# Supplementary material for: GNAI2 Is a Risk Factor for Gastric Cancer: Study of Tumor Microenvironment (TME) and Establishment of Immune Risk Score (IRS)
Source: PubMed Central journal article supplement (PMC9586761; doi:10.1155/2022/1254367), 2022-10-14
Supplement: 1254367.f1.pdf [file 1254367.f1.pdf]

FigS1

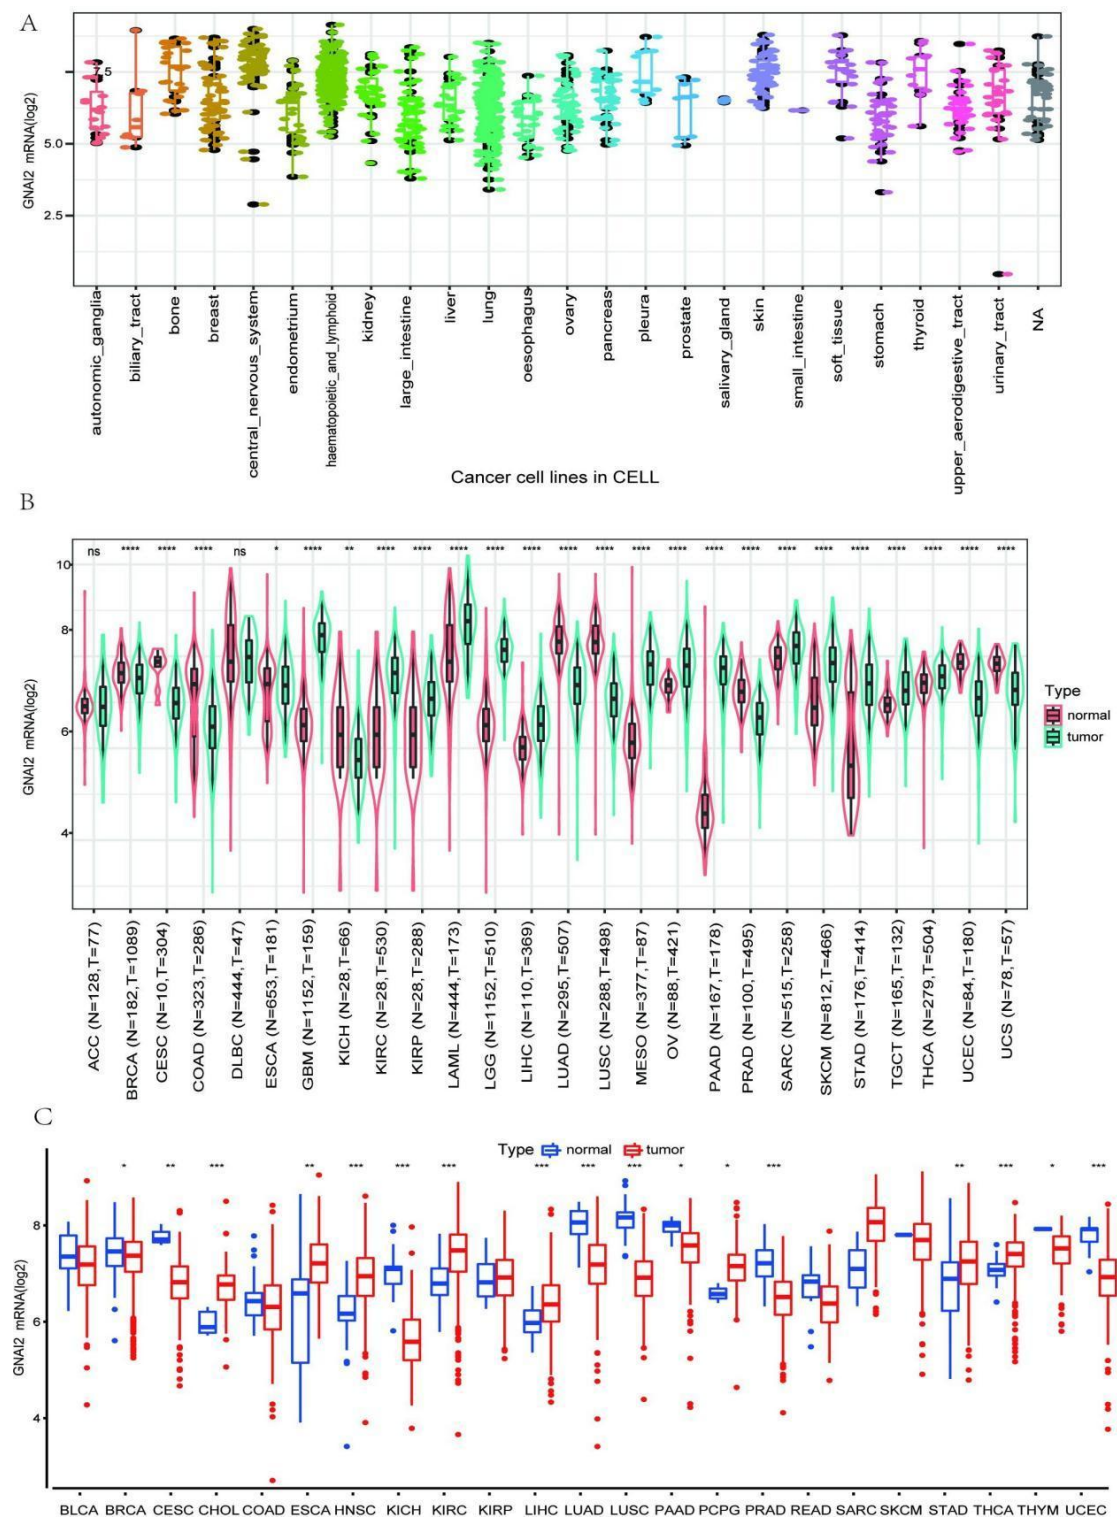

Figure S1: Expression of GNAI2 in pan-cancer. (A) Expression of GNAI2 in the CCLE database. (B) Expression of GNAI2 in TCGA combined with GTEx in pan-cancerous tissues. Asterisk indicates a statistically significant p-value (\* $P < 0.001$  ; \*\* $P < 0.01$  ; \* $P < 0.05$ ) following the Mann-Whitney U test. (C) Expression of GNAI2 in TCGA in pan-cancerous tissues.

FigS2

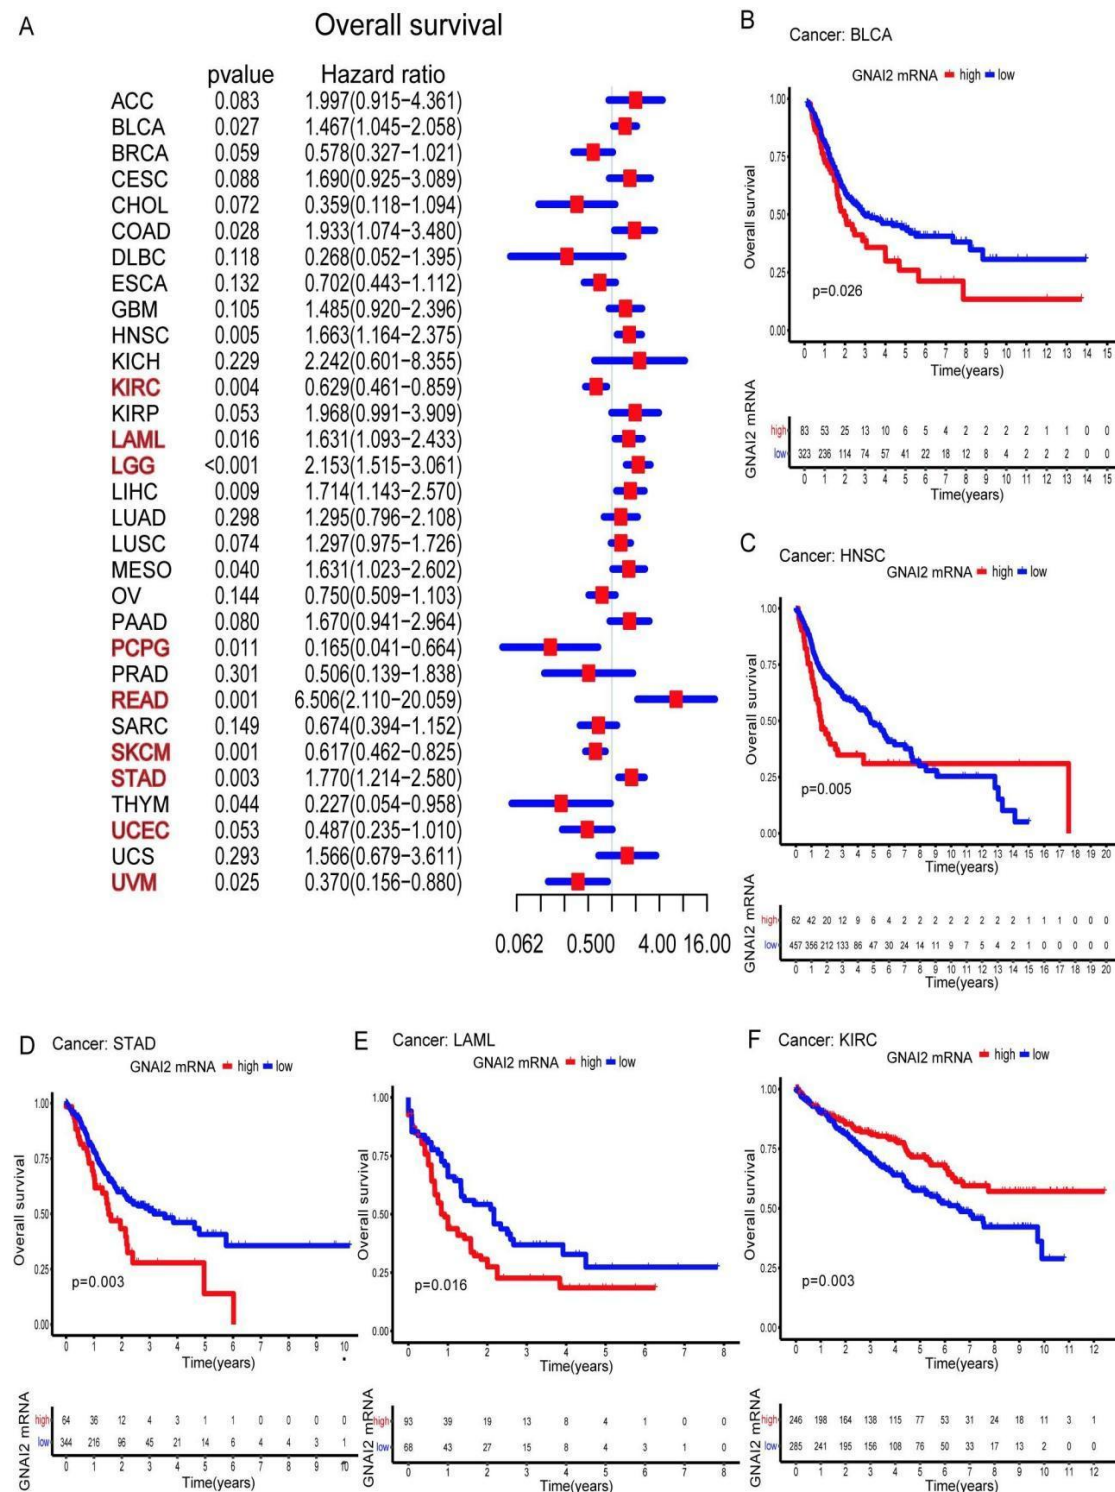

Figure S2: Prognostic analysis of GNAI2 for overall survival in pan-cancers. (A) Prognostic analyses of GNAI2 in pan-cancers using a univariate Cox regression model. A hazard ratio >1 indicates a risk factor and hazard ratio <1 represents a protective factor. (B-G) Prognostic analyses of GNAI2 in pan-cancers using the Kaplan-Meier method and log-rank test. Only cancers in which GNAI2 was a significant prognostic biomarker are shown.

FigS3

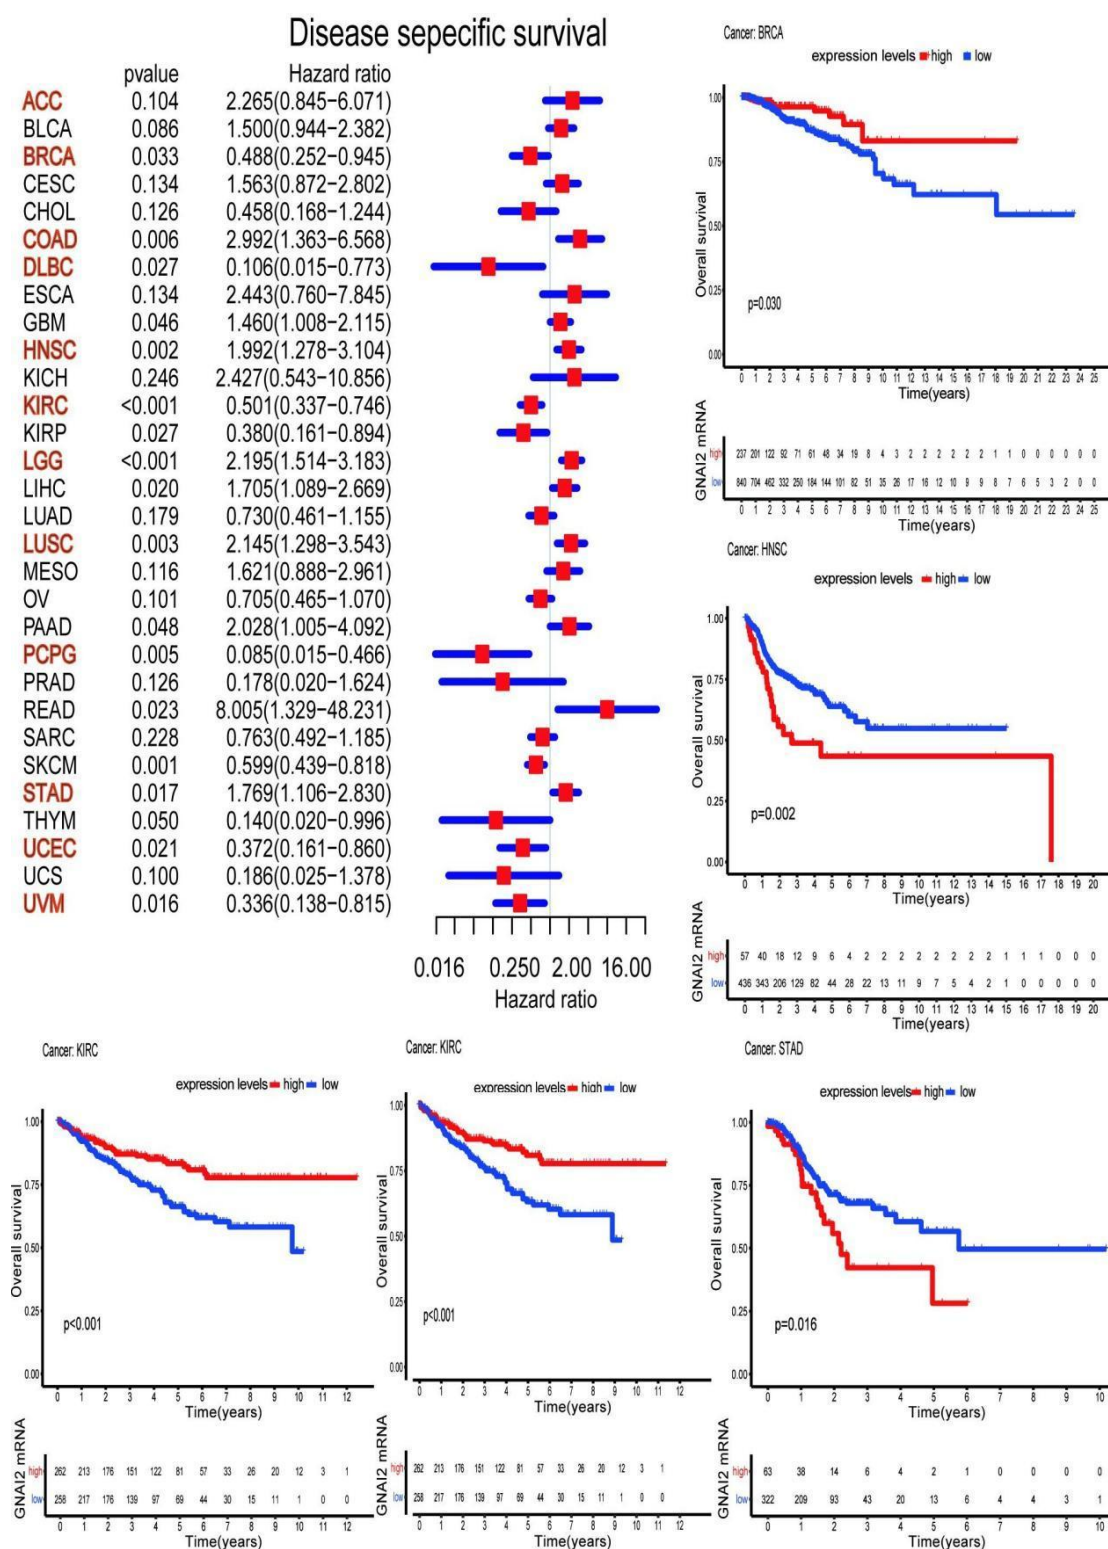

Figure S3: Prognostic analysis of GNAI2 for disease-specific survival in pan-cancers. (A) Prognostic analyses of GNAI2 in pan-cancers using a univariate Cox regression model. A hazard ratio >1 indicates a risk factor and hazard ratio <1 represents a protective factor. (B-G) Prognostic analyses of GNAI2 in pan-cancers using the Kaplan-Meier method and log-rank test. Only cancers in which GNAI2 was a significant prognostic biomarker are shown.

FigS4

A

## Progression free survival

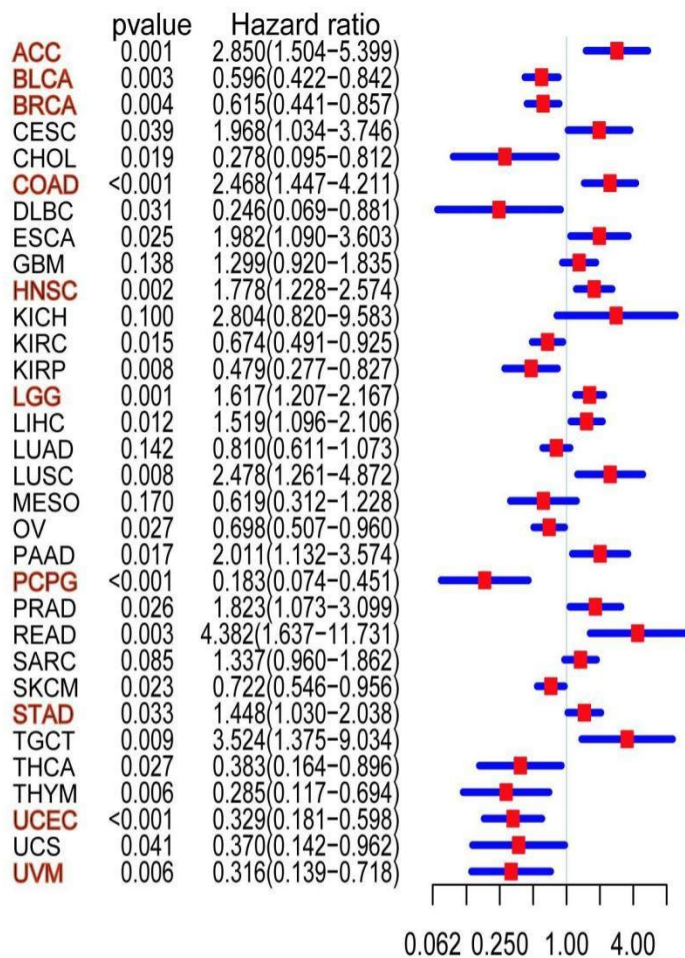

B

Cancer: ACC

GNAI2 mRNA high low

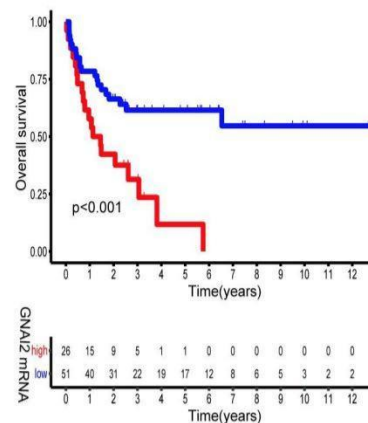

C

Cancer: CHOL

GNAI2 mRNA high low

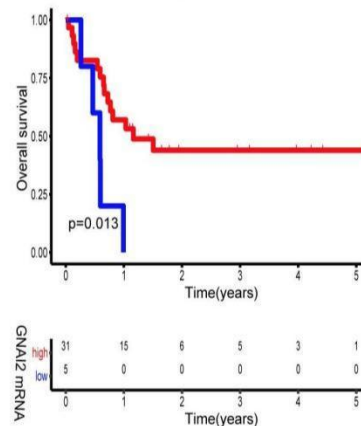

D Cancer: PCPG

GNAI2 mRNA high low

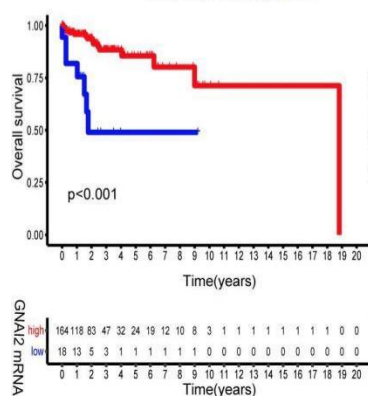

E Cancer: STAD

GNAI2 mRNA high low

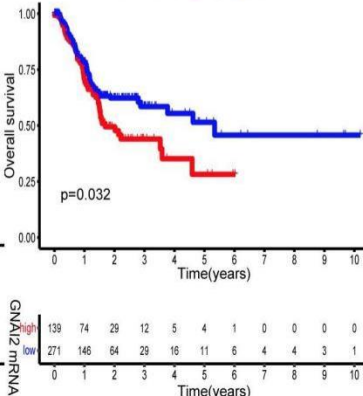

F Cancer: ESCA

GNAI2 mRNA high low

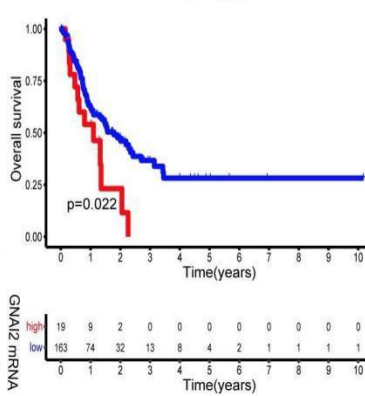

Figure S4: Prognostic analysis of GNAI2 for progression-free survival in pan-cancers. (A) Prognostic analyses of GNAI2 in pan-cancers using a univariate Cox regression model. A hazard ratio >1 indicates a risk factor and hazard ratio <1 represents a protective factor. (B-G) Prognostic analyses of GNAI2 in pan-cancers using the Kaplan-Meier method and log-rank test. Only cancers in which GNAI2 was a significant prognostic biomarker are shown.

FigS5

A

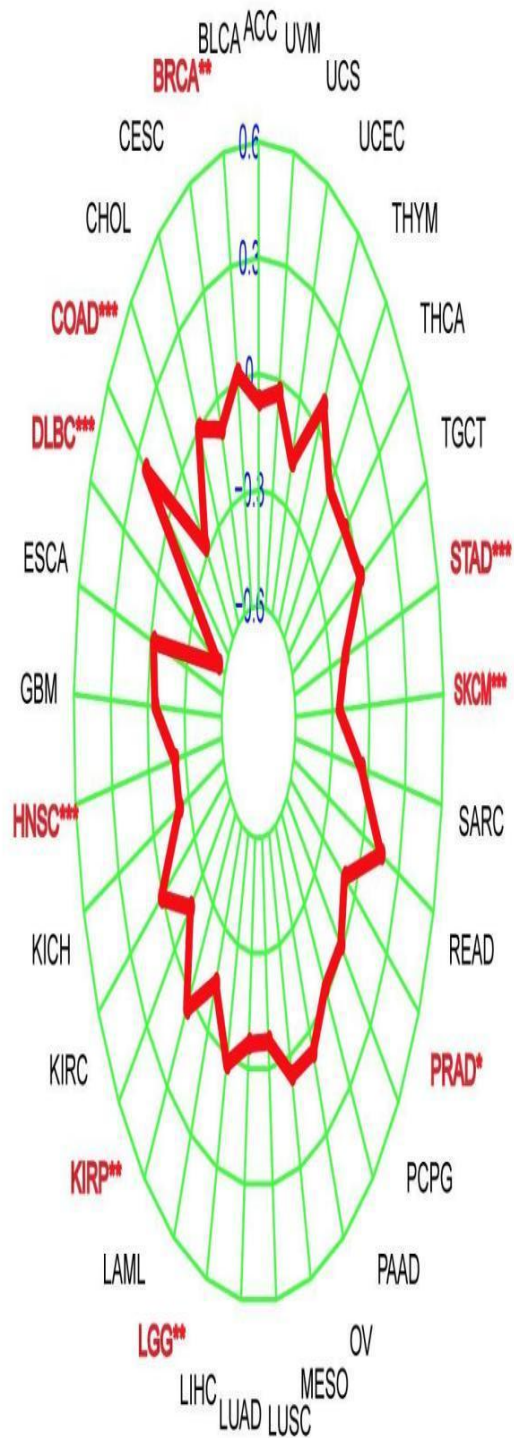

B

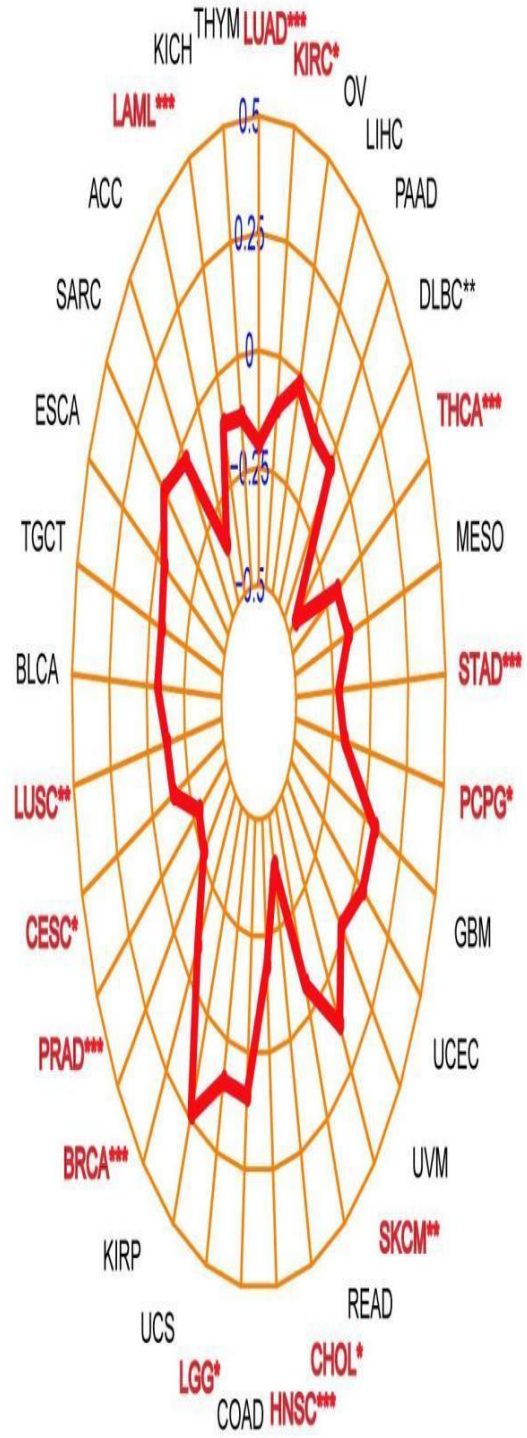

Figure S5: Correlations between GNAI2 with TMB and MSI in pan-cancers. (A) Correlation between GNAI2 and TMB in pan-cancers. (B) Correlation between GNAI2 and MSI in pan-cancers. Asterisks indicate a significant statistical p-value calculated from Spearman correlation analysis (\*P < 0.05; \*\*P < 0.01; \*\*\*P < 0.001)

FigS6

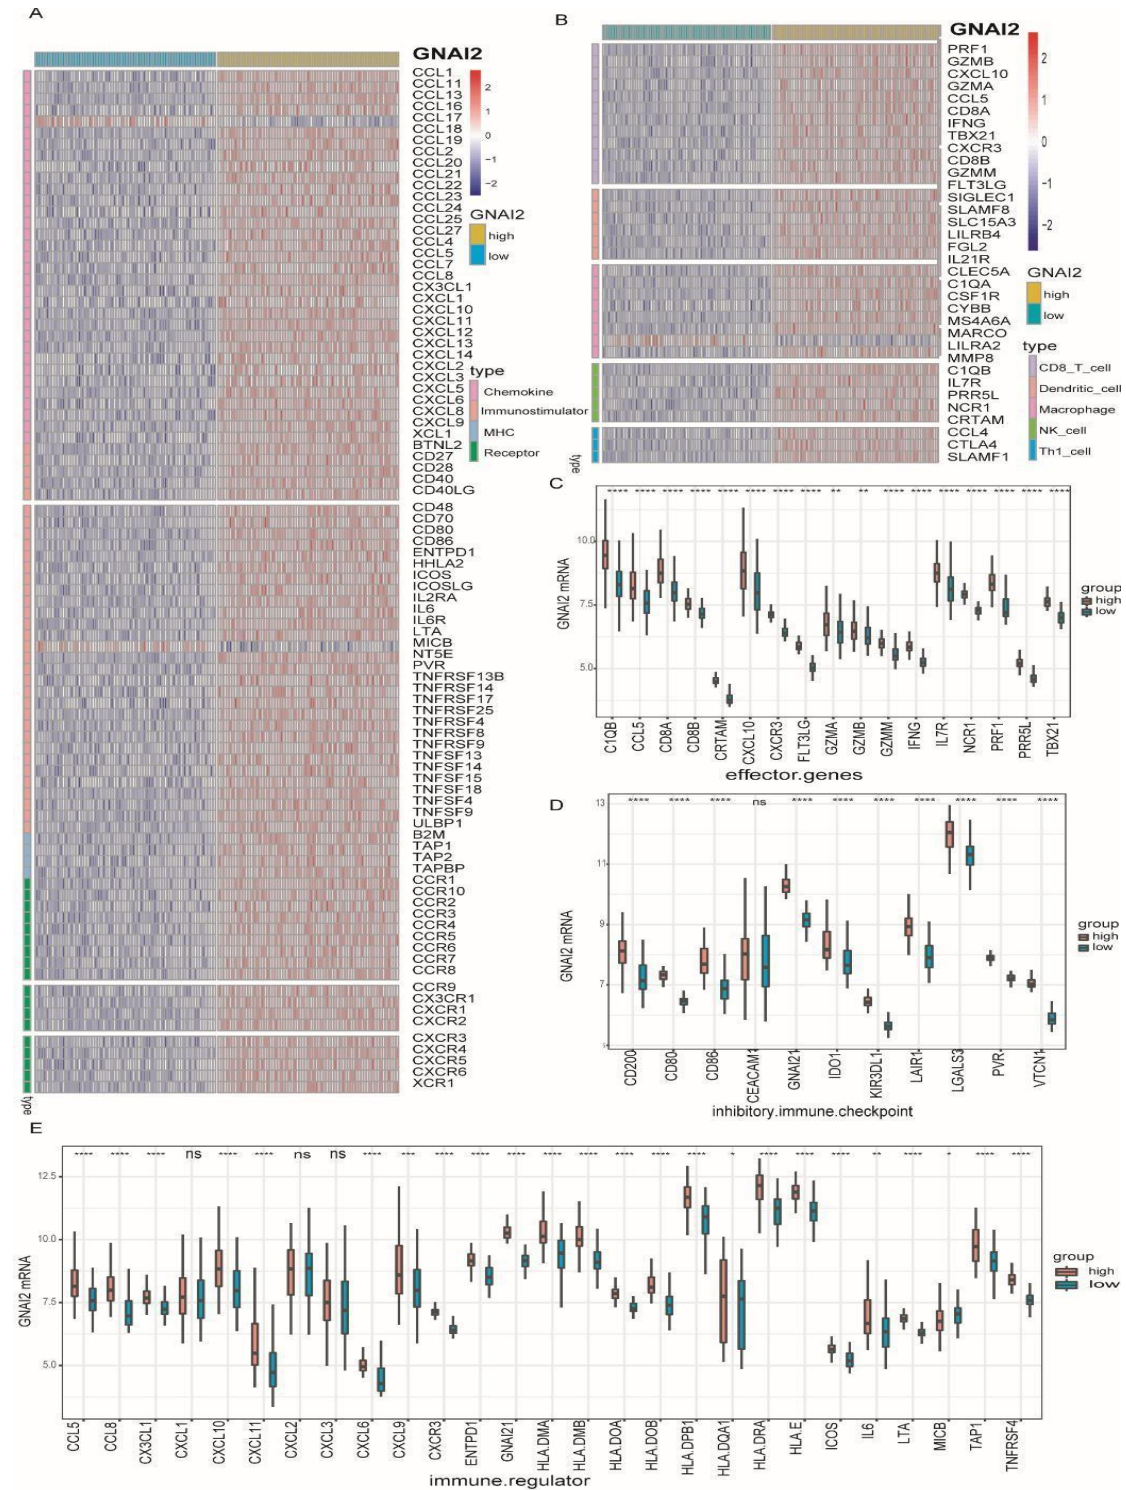

Figure S6: Correlation between immunomodulators and immunological status and GNAI2 in the GSE29272 cohort. (A) Differences in expression of 105 immunomodulators (chemokines, receptors, MHC and immunostimulatory factors) in GC between high- and low-GNAI2 groups. (B) Differences in effector genes of the above tumor-associated immune cells between high- and low-GNAI2 groups. (C-D) Correlation between GNAI2 and effect genes and inhibitory immune checkpoints in GC.

**A**

**B**

**C**

**D**

**E**

**F**

**G**

**H**

**I**

**J**

**K**

**L**

**M**

**N**

**O**

**P**

**Q**

**R**

**S**

**T**

**U**

**V**

**W**

**X**

**Y**

**Z**

**AA**

**AB**

**AC**

**AD**

**AE**

**AF**

**AG**

**AH**

**AI**

**AJ**

**AK**

**AL**

**AM**

**AN**

**AO**

**AP**

**AQ**

**AR**

FigS8

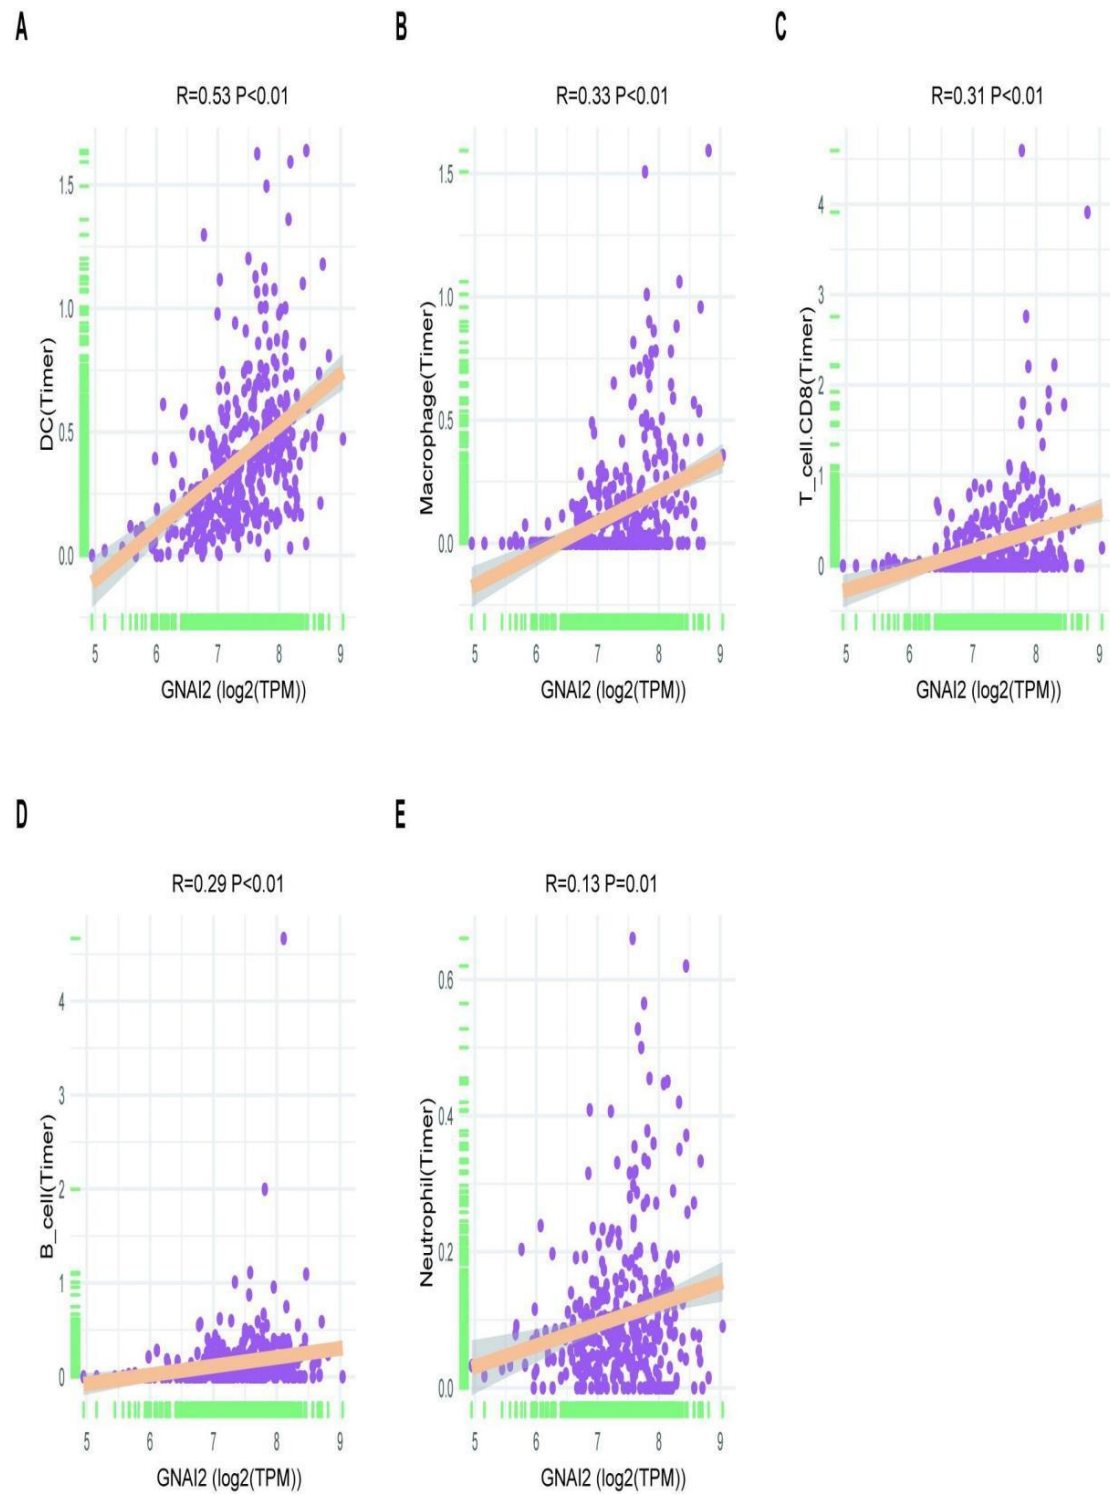

Figure S8: Correlations between GNAI2 and tumor-associated immune cells calculated with the TIMER algorithm. The p-value was calculated from Spearman correlation analysis.

FigS9

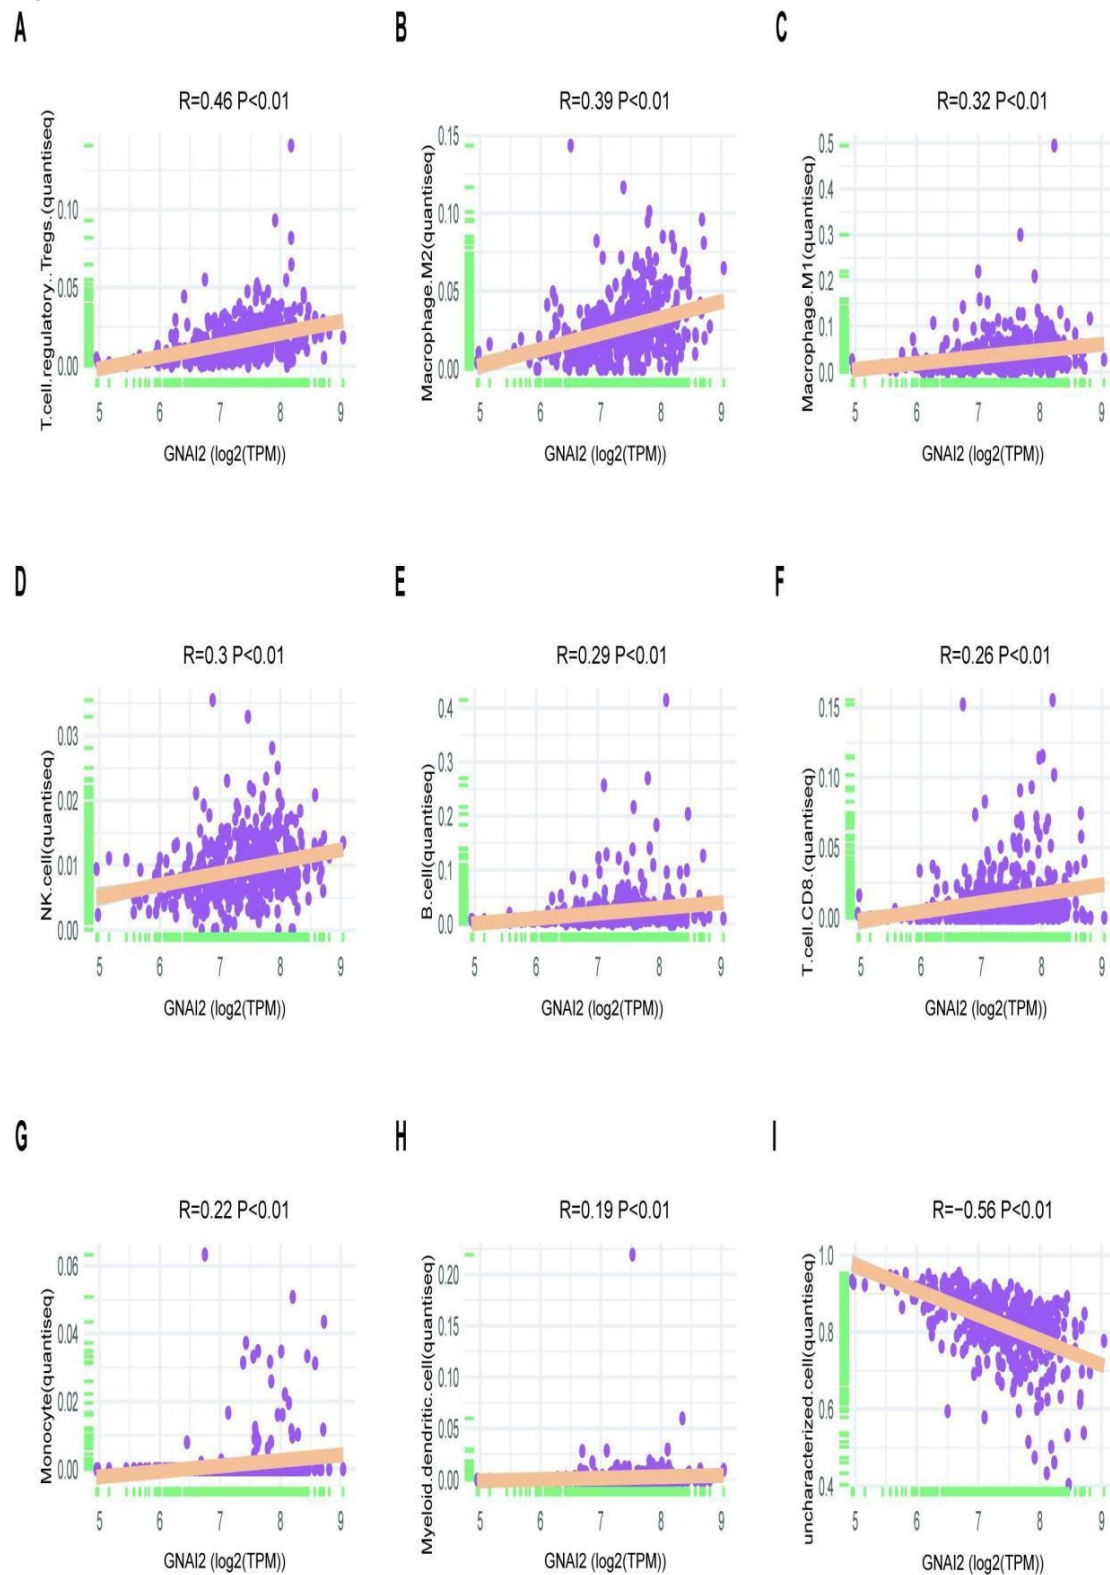

Figure S9: Correlations between GNAI2 and tumor-associated immune cells calculated with the quanTiseq algorithm. The p-value was calculated from Spearman correlation analysis.

FigS10

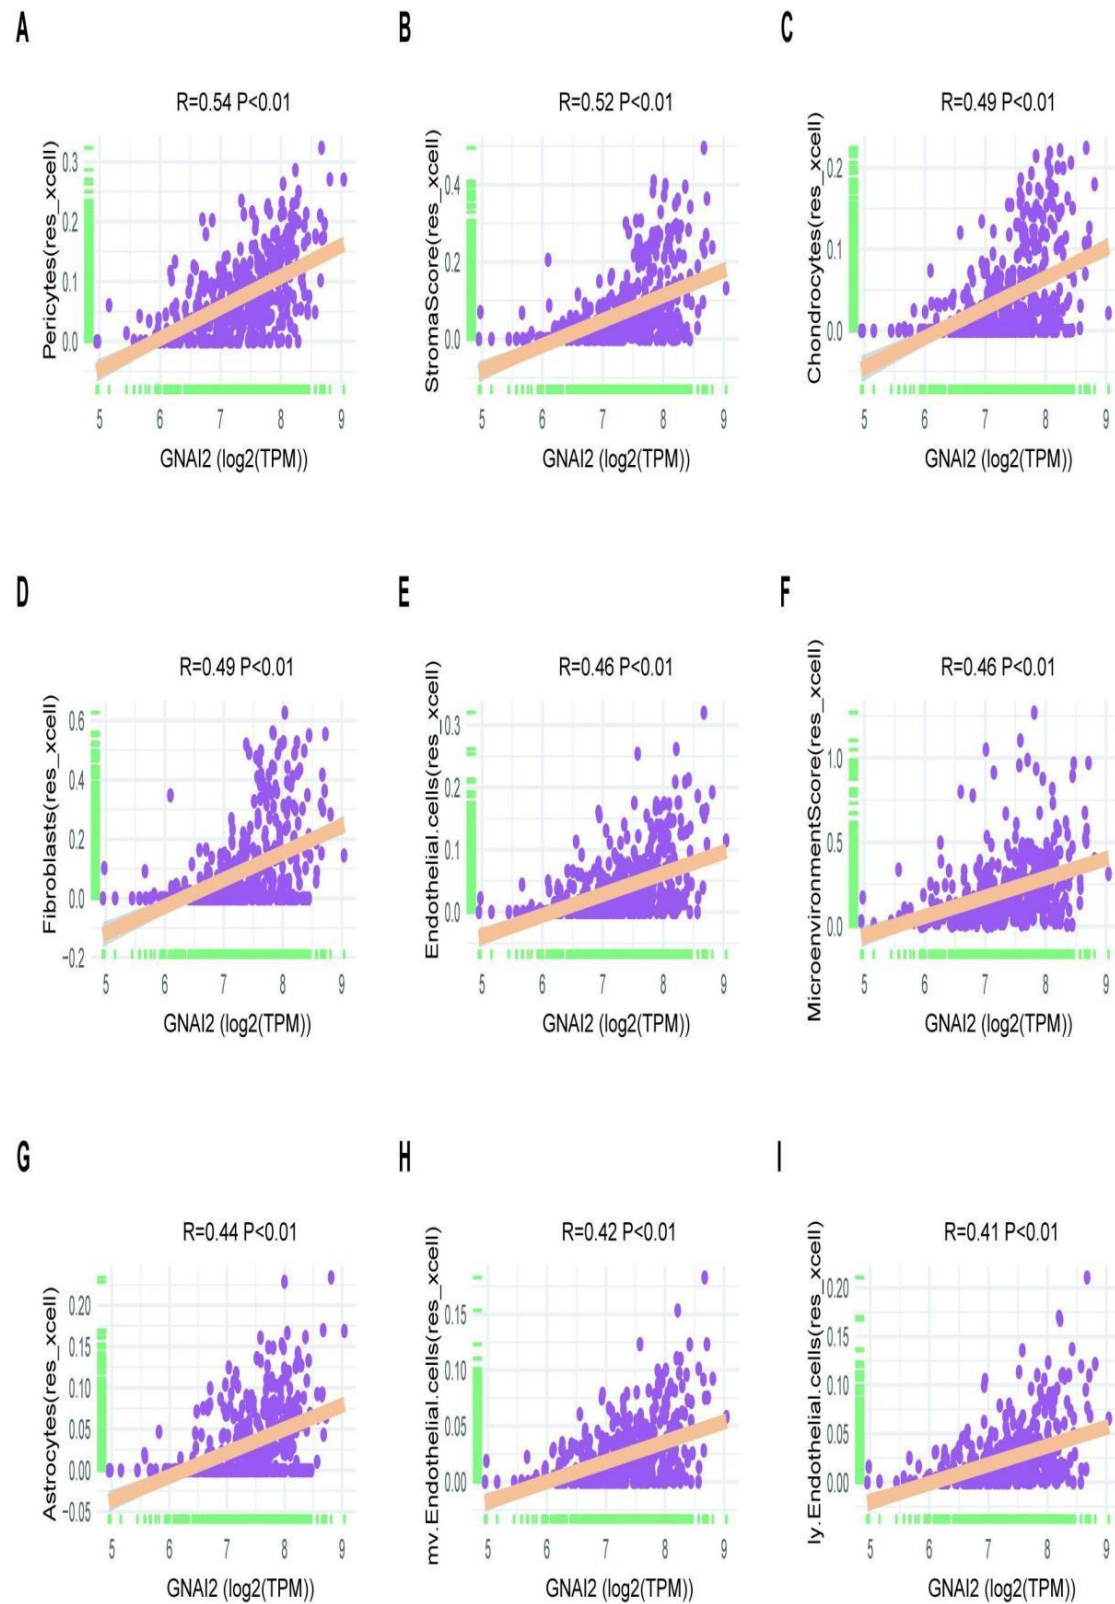

Figure S10: Correlations between GNAI2 and tumor-associated immune cells calculated with the xCell algorithm. The p-value was calculated from Spearman correlation analysis.

FigS11

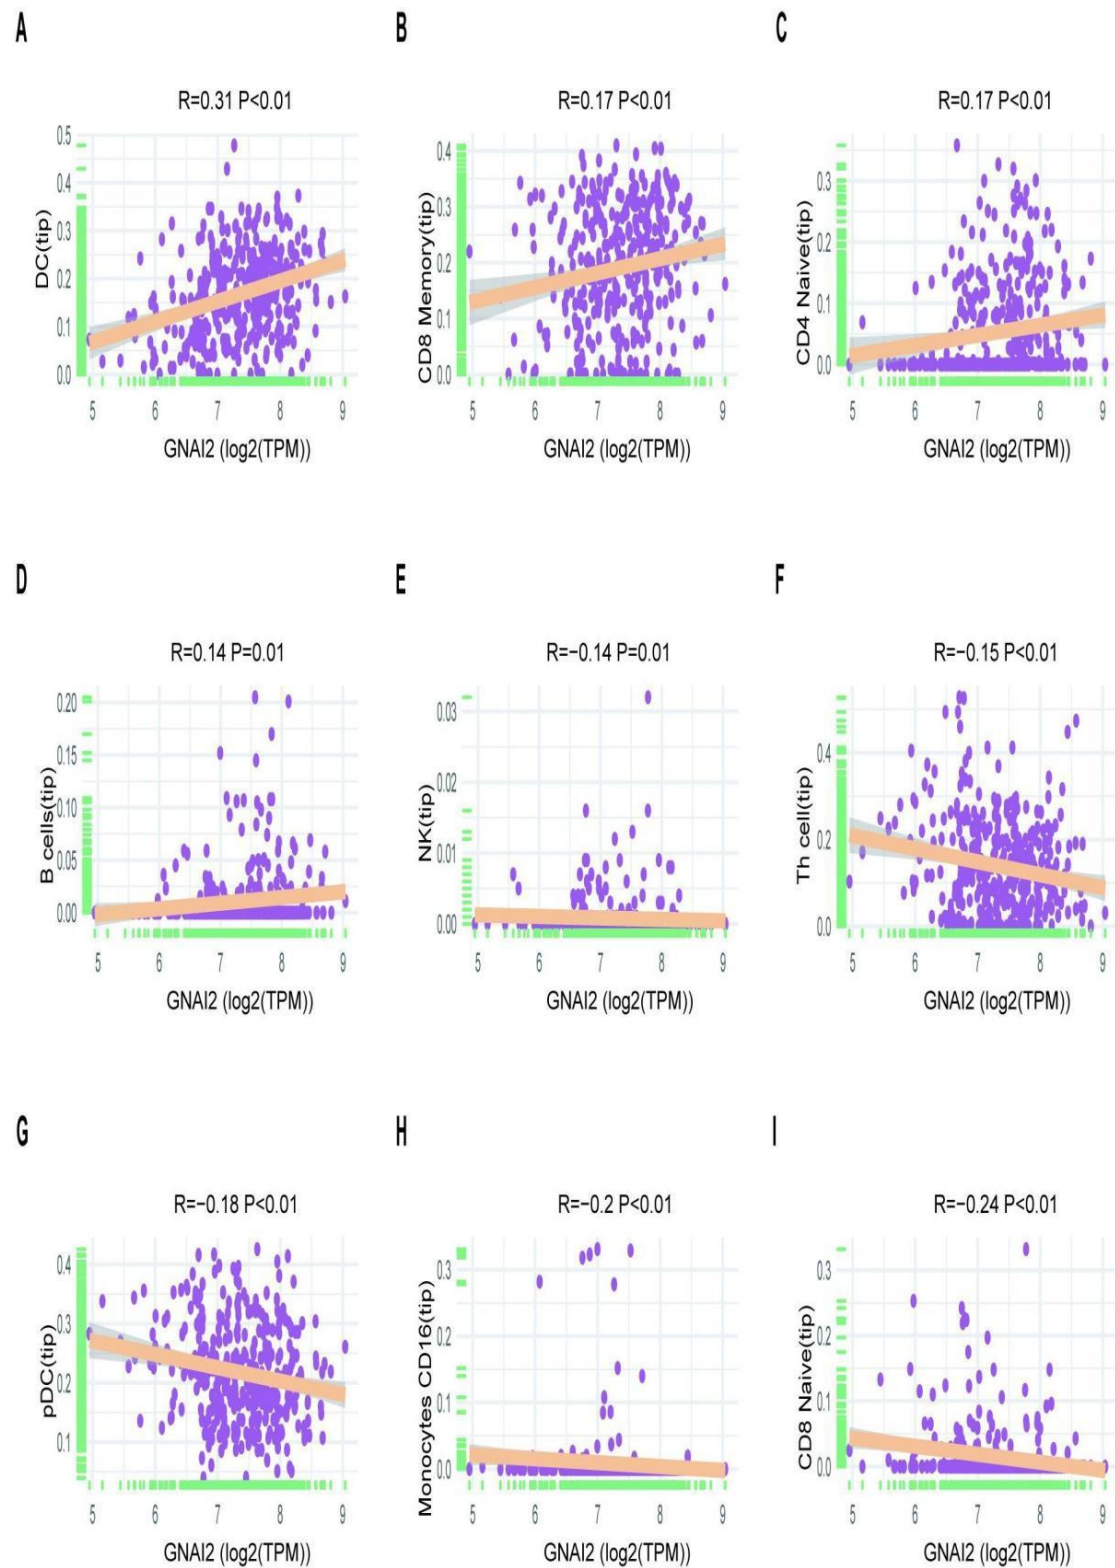

Figure S11: Correlations between GNAI2 and tumor-associated immune cells calculated with TIP algorithm. The p-value was calculated from Spearman correlation analysis.

FigS12

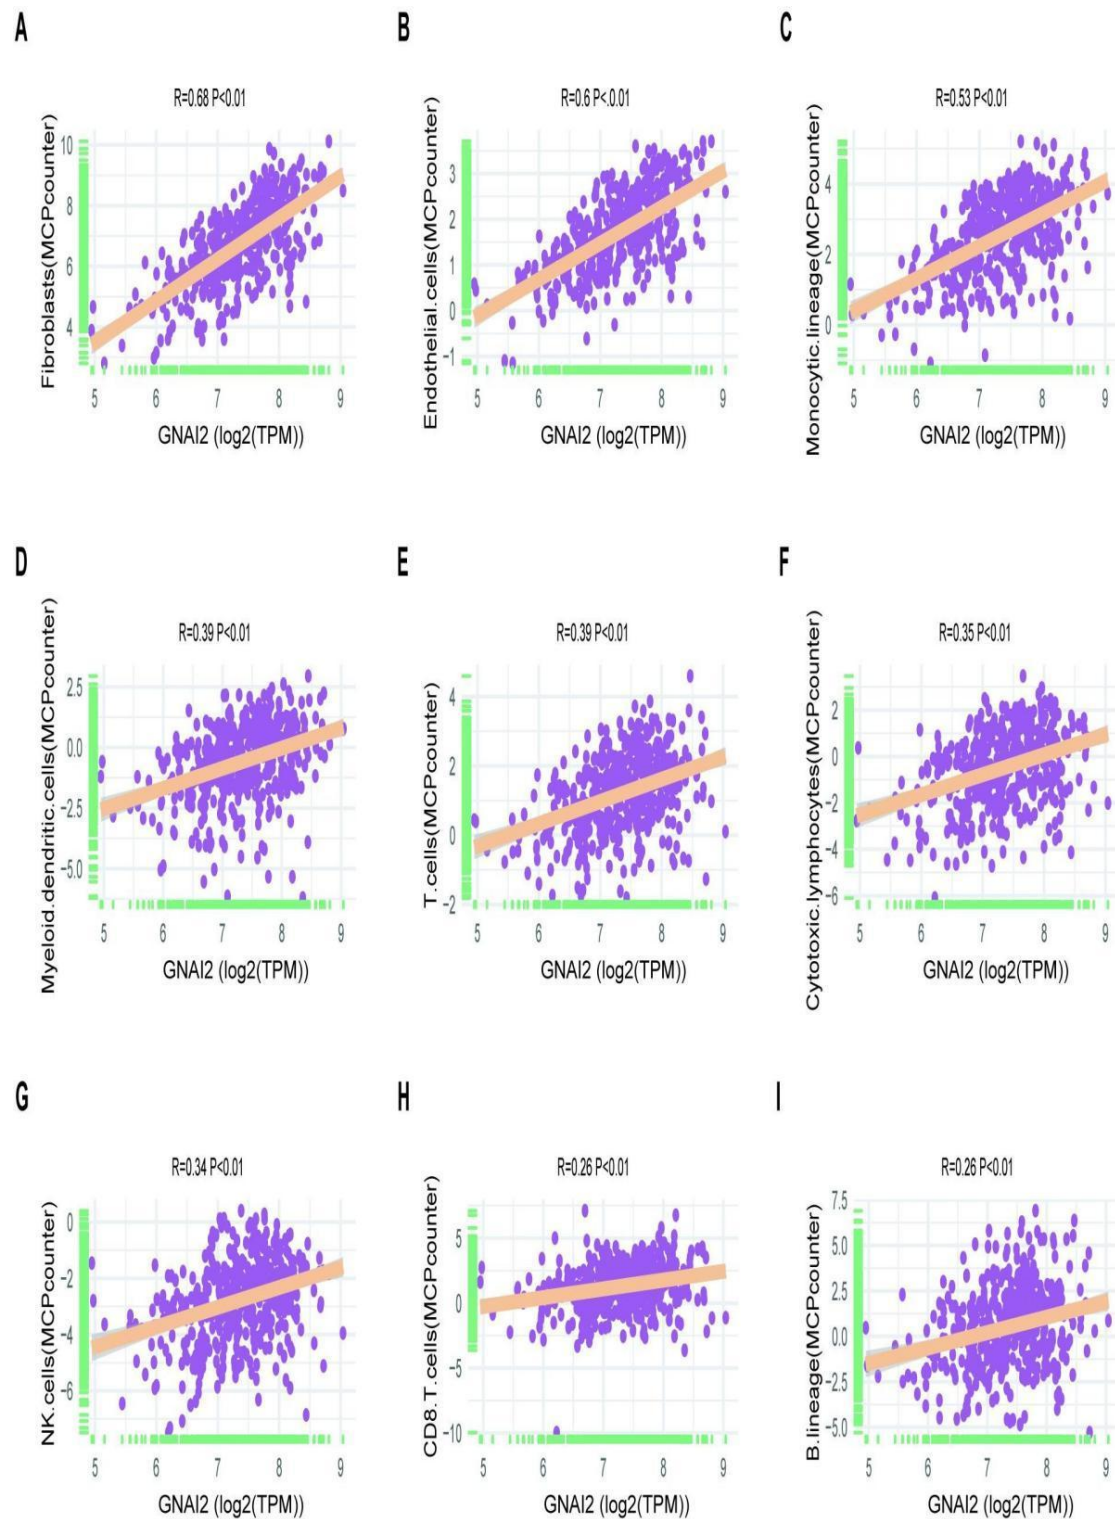

Figure S12: Correlations between GNAI2 and tumor-associated immune cells calculated with MCP-counter algorithm. The p-value was calculated from Spearman correlation analysis.

FigS13

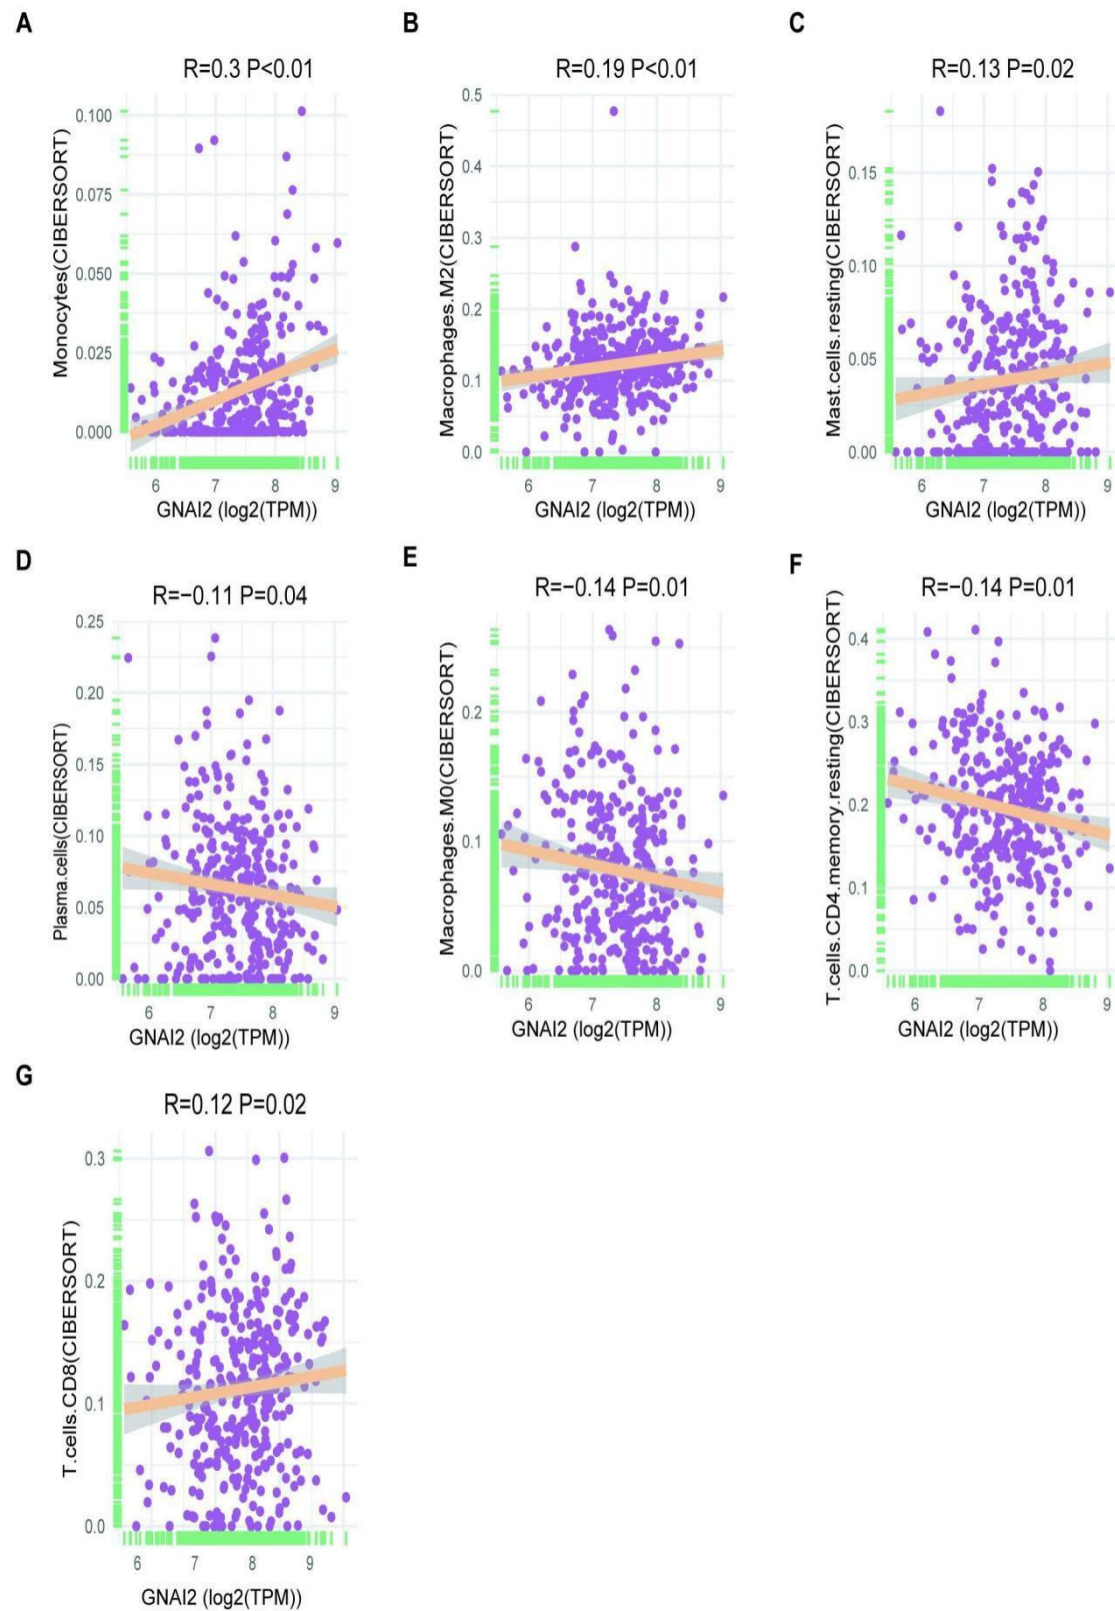

Figure S13: Correlations between GNAI2 and tumor-associated immune cells calculated with the CIBERSORT-ABS algorithm. The p-value was calculated from Spearman correlation analysis

FigS14

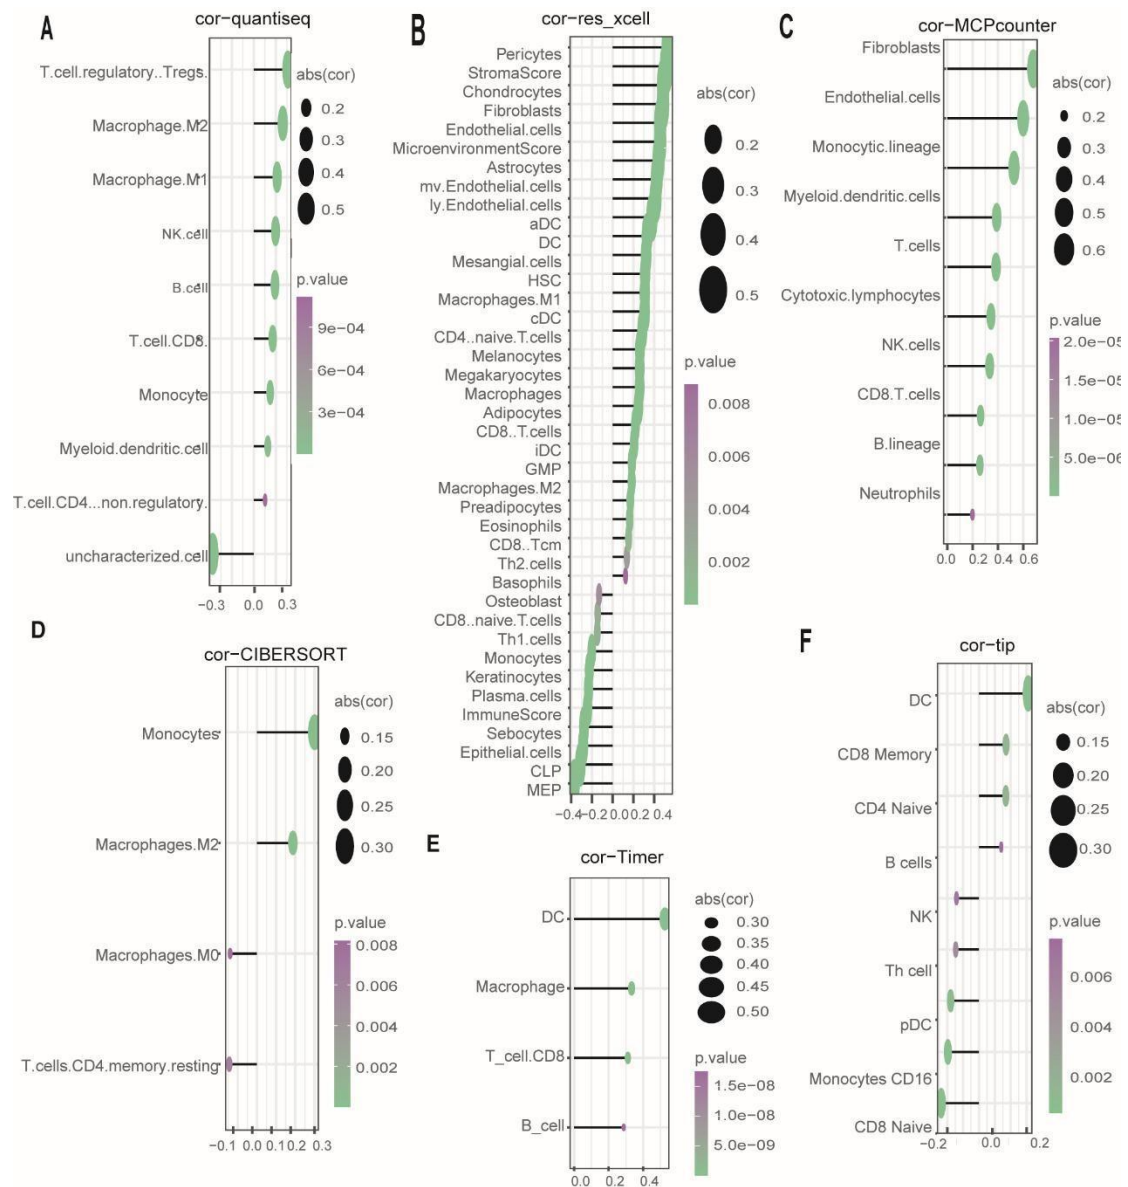

Figure S14: Six algorithms to calculate the immune correlation between GNAI2 and tumor

FigS15

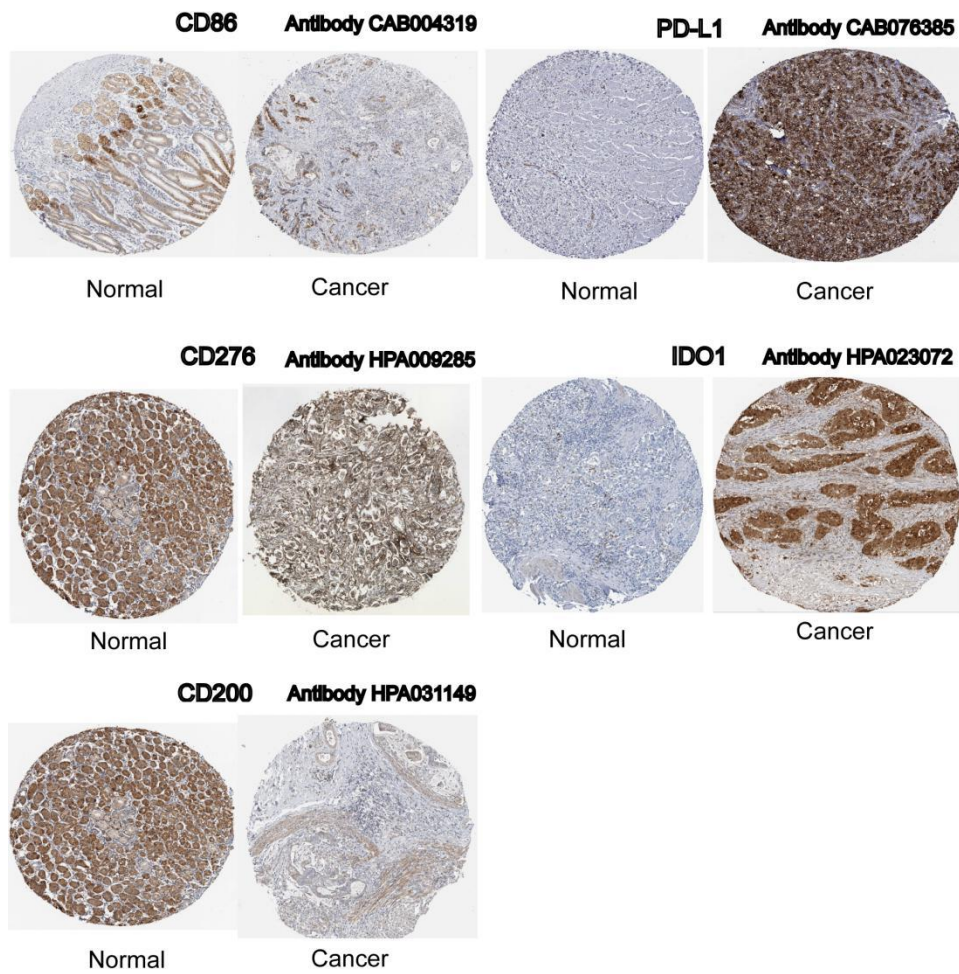

Figure S15: Immunohistochemistry staining of CD86,CD276,CD200,PD-L1,IDO1 in the normal stomach tissue and stomach cancer from the HPA database

FigS16

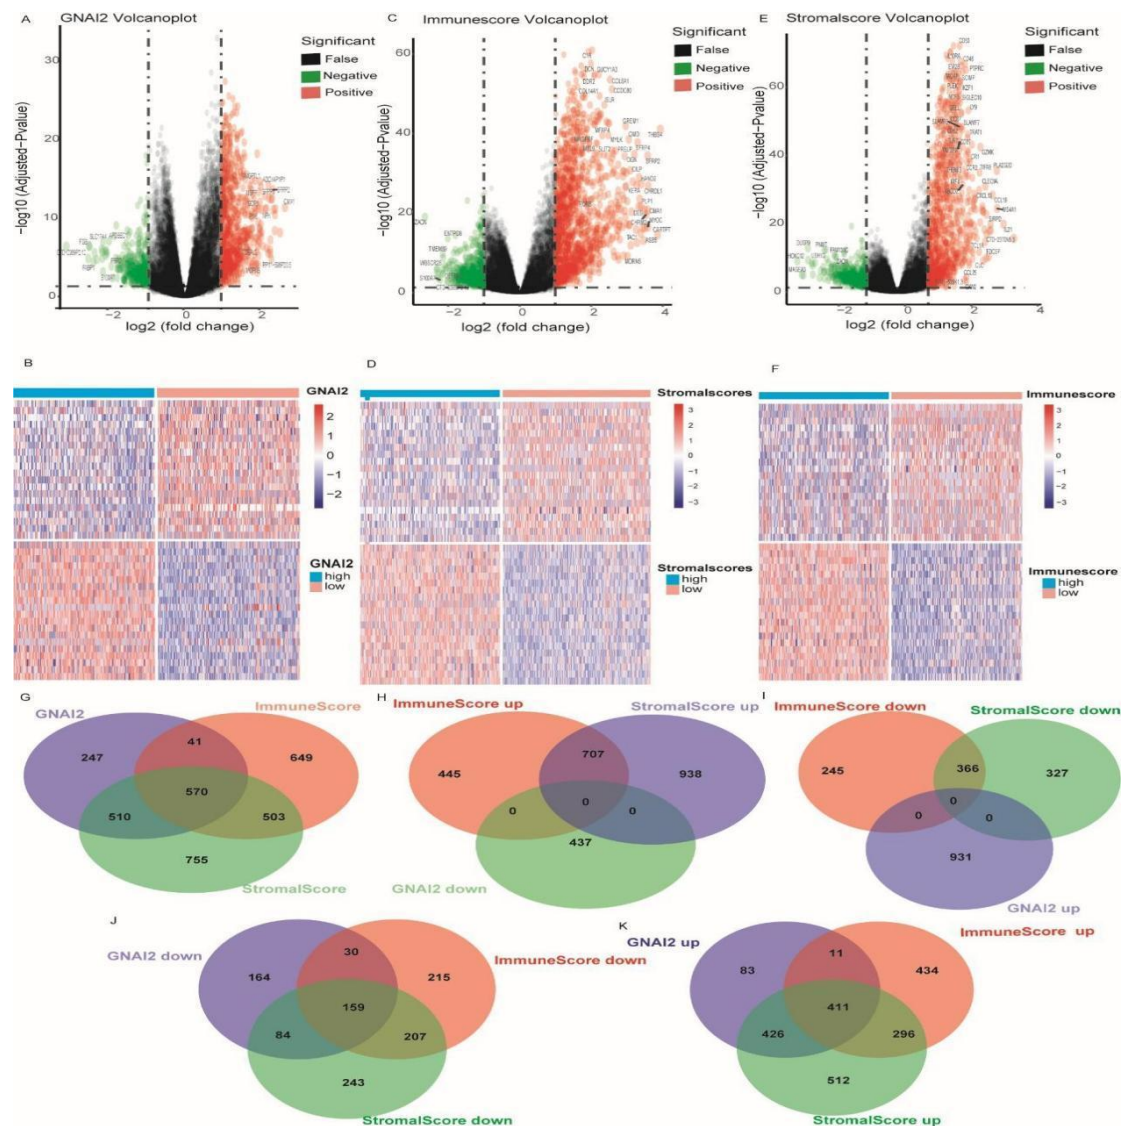

Figure S16: Differentially-expressed RNA between the immune score group and the quality evaluation group in the GNAI2 group. (A-F) Differentially-expressed RNA among the GNAI2 group, immune/stromal group in the volcano map and heatmap. Set the standard for determining differentially-expressed RNA to the adjusted P-value < 0.05 and  $|\log_{2}FC| > 0.8$ . (G) There are 570 common immune-related differentially-expressed RNAs shown in the VENN diagram. (H-I) There was no overlap between the high-GNAI2 group and low-immune stromal score group. Similarly,, there was no overlap between low-GNAI2 group and high-immune/stromal score group (J)There were 159 common RNAs between the low-GNAI2 group and low-immune/stromal score group (K)There were 411 common RNAs between the high-GNAI2 and high-immune/stromal score group

Fig S17:

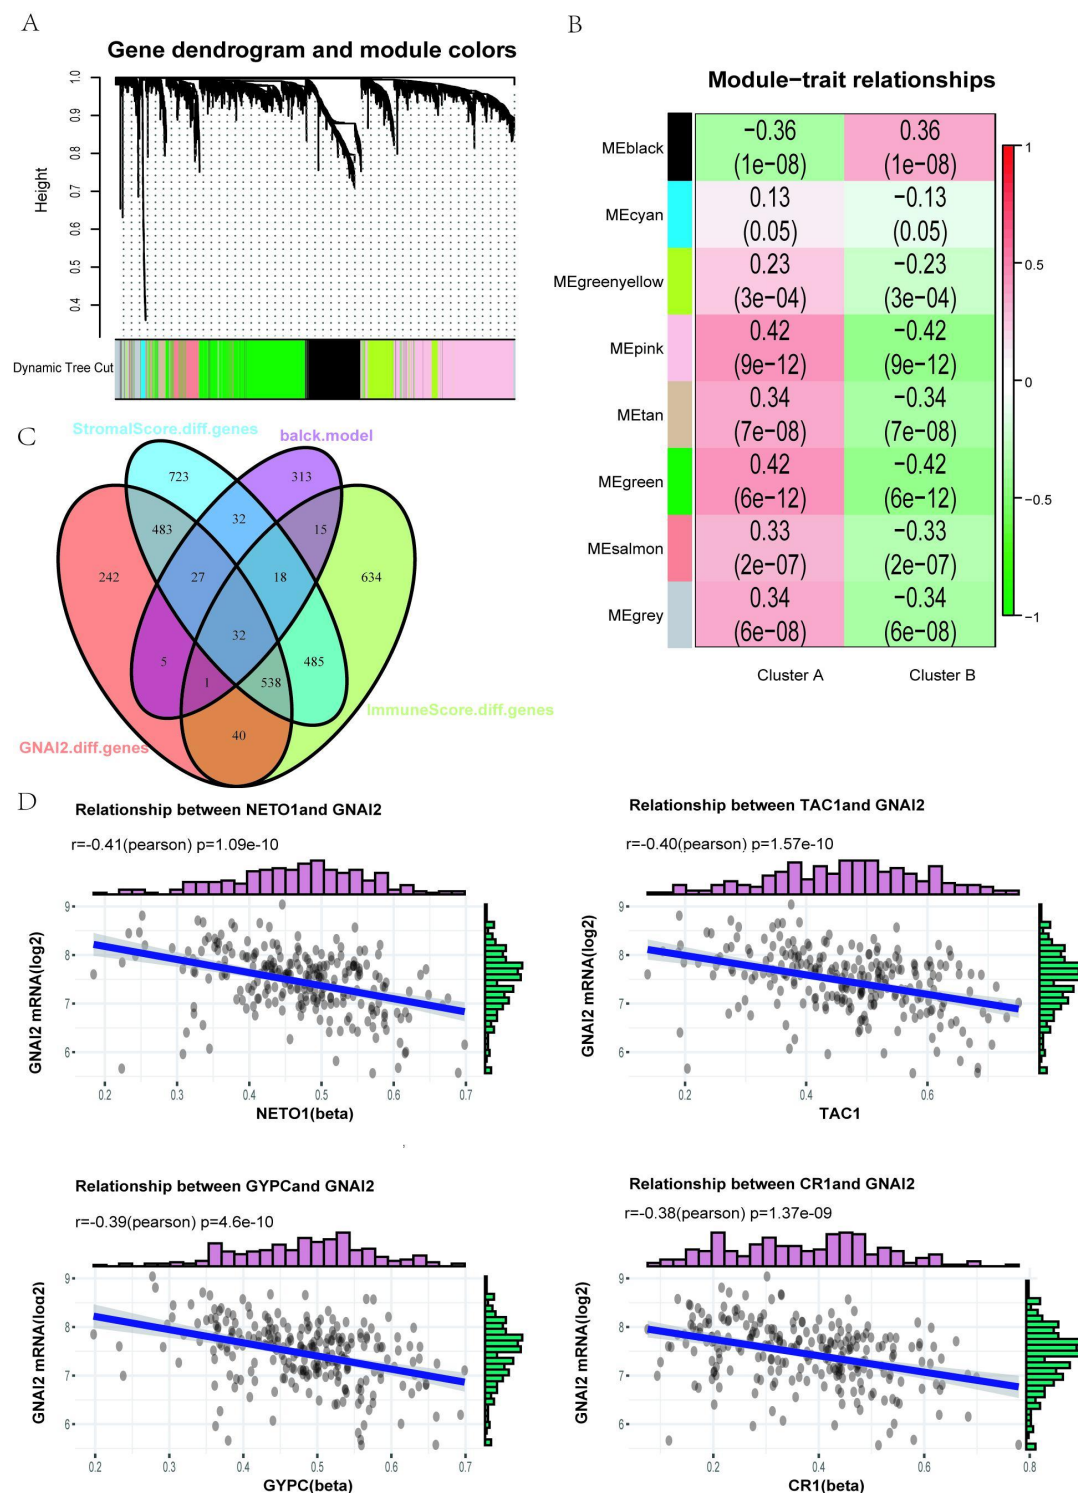

Fig S17: Integration of epigenetic change and gene expression between Cluster-A and -B patients. (A) Dendrogram indicating expression of different gene modules in patients involved in WGCNA analysis. (B) Correlation between module eigengenes and the two Clusters (A vs.B). (C) Venn diagram showing the overlap of genes in the black module with GNAI2, immune scores, high and low stroma scores. (D) Local regression curves (Spearman rank correlation) between expression of GNAI2 and 4 oncogenes identified in the black module.

FigS18

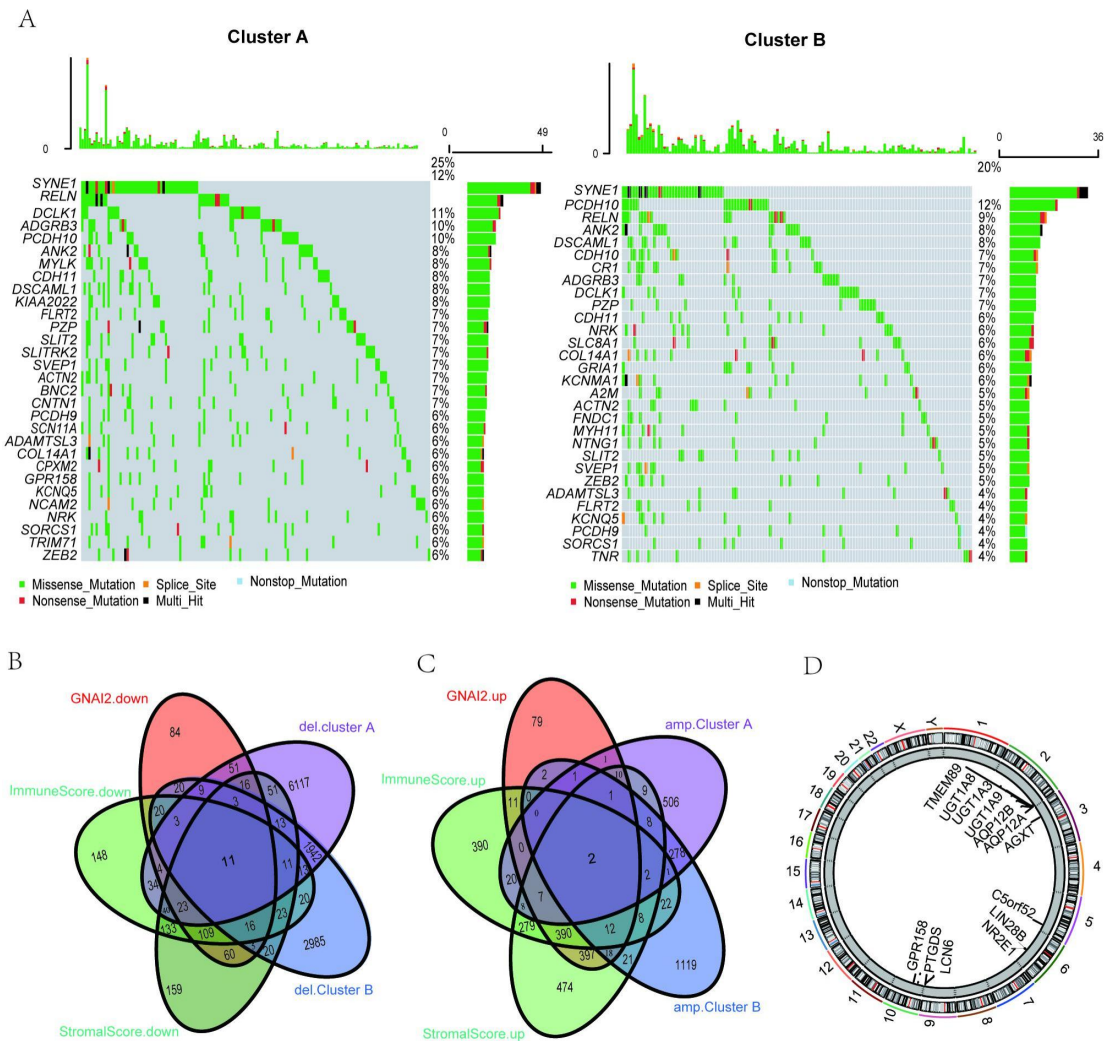

FigS18: Comparisons of somatic variations and CNV between two cluster patterns associated with a GNAI2-associated immune microenvironment. Waterfall plots showed the top 30 mutated in Cluster A and Cluster B . Each column represented individual patients. The upper barplot showed TMB, The number on the right indicated the mutation frequency in each gene. The right barplot showed the proportion of each variant type. (B-C) In the Cluster A and Cluster B, the significantly amplified or deleted genes overlapped with the expression of GNAI2, the immune score, and the differentially-expressed genes in the high stroma score group and the low stroma score group, respectively. Each circle in the Venn diagram represents a set, and the numbers in the overlapping region represent the common genes between the sets. (D) The location of CNV alteration of GNAI2-associated immune microenvironment regulators on 23 chromosomes using TCGA-STAD cohort.

FigS19

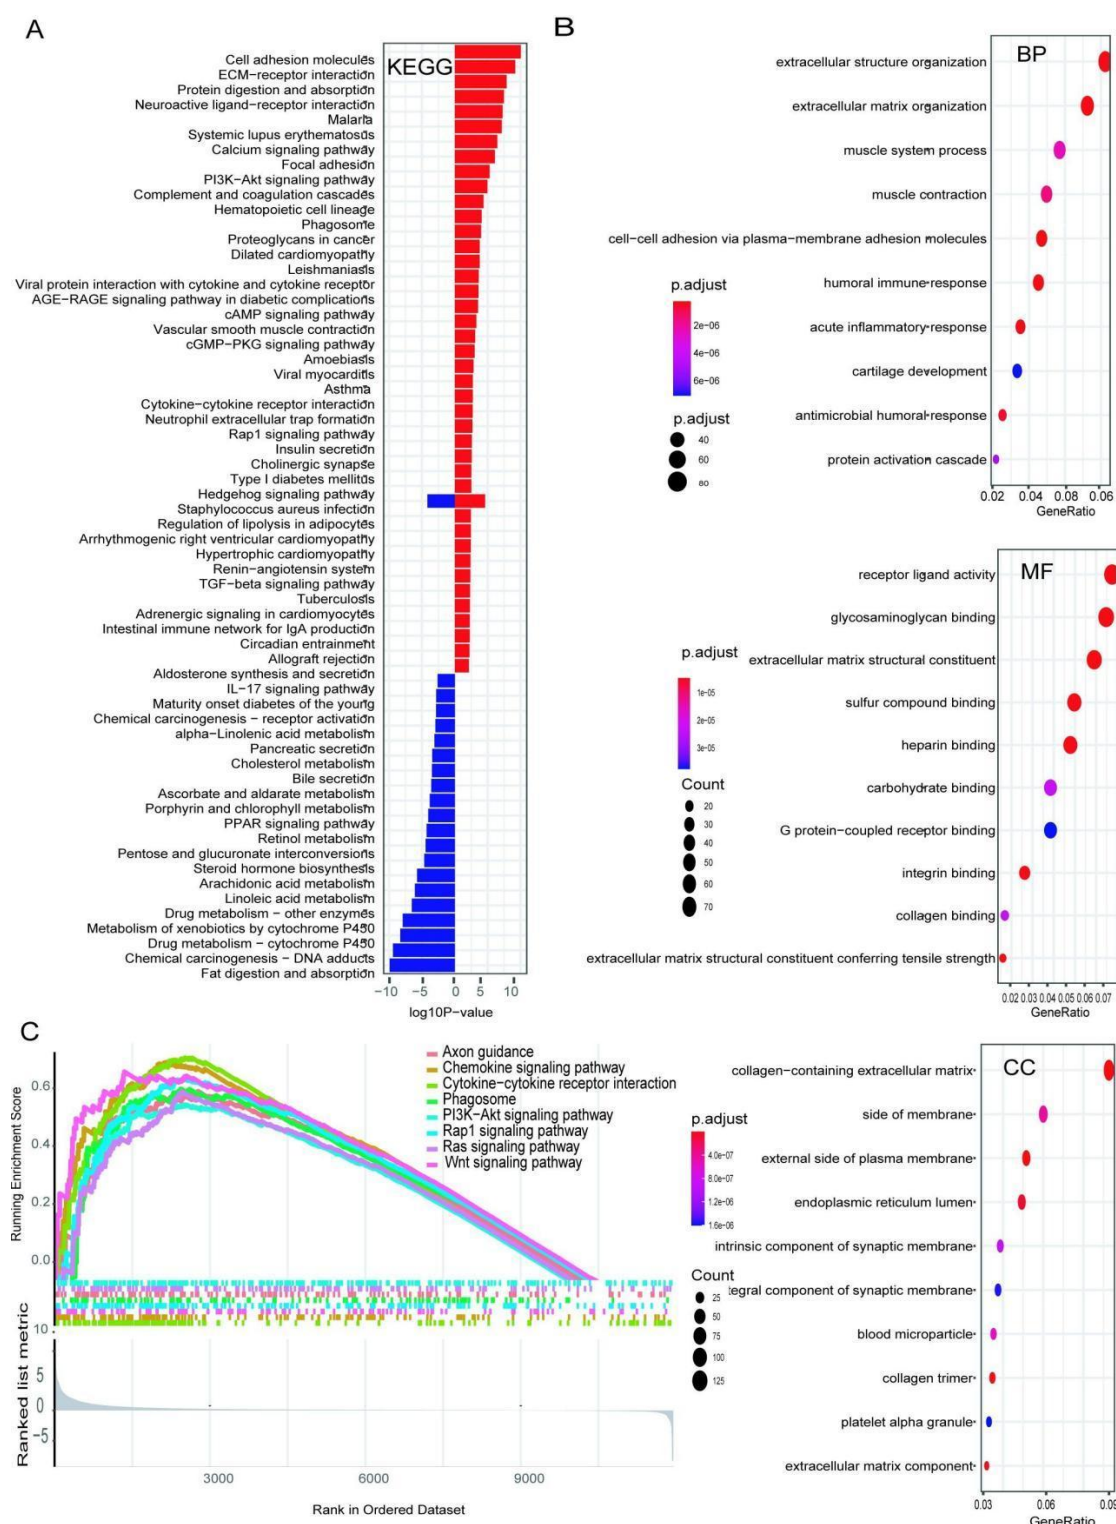

Figure S19: Gene enrichment analysis of the GNAI2-related immune microenvironment (A) 570 common differentially-expressed RNAs were analyzed by KEGG. (B) The biological processes, cellular compositions and molecular functions of the 570 common differentially-expressed RNAs. (C) GSEA analysis of the high- and low-GNAI2 groups.

FigS20

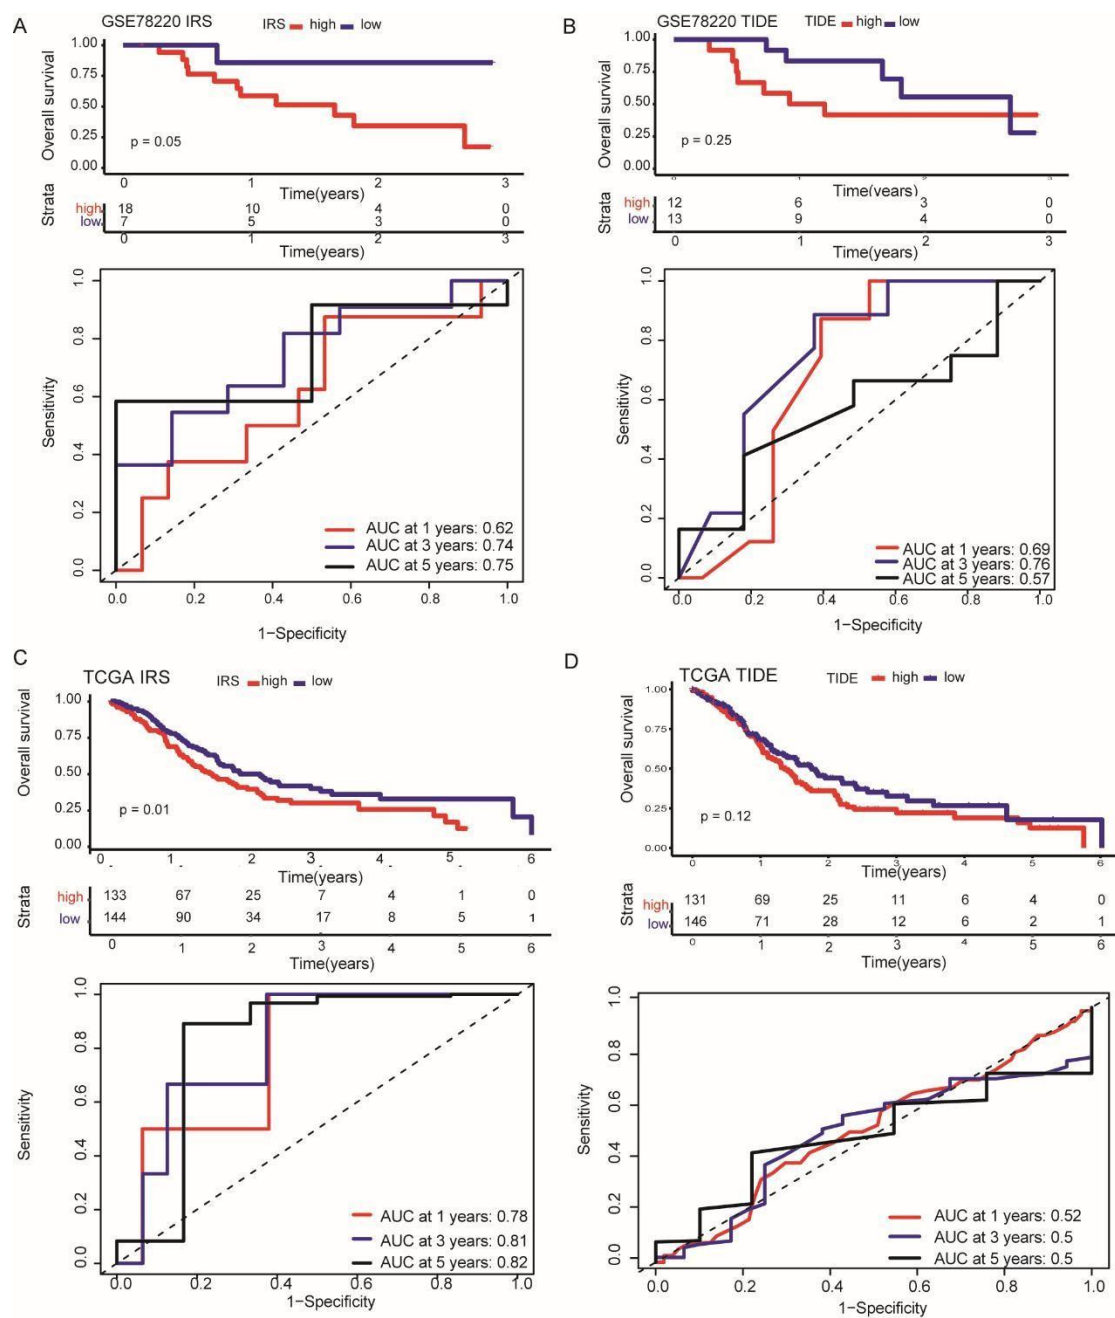

Figure S20: Comparison of the accuracy of the IRS and TIDE algorithms for predicting survival probability of GSE78220 and TCGA datasets. (A-D) Kaplan-Meier curve analysis was used to analyze the survival of patients with high and low TIDE, and high and low IRS. Time-dependent ROC curves were used to compare the 1-, 3- and 5-year overall survival between high and low TIDE, and high and low IRS.

FigS21

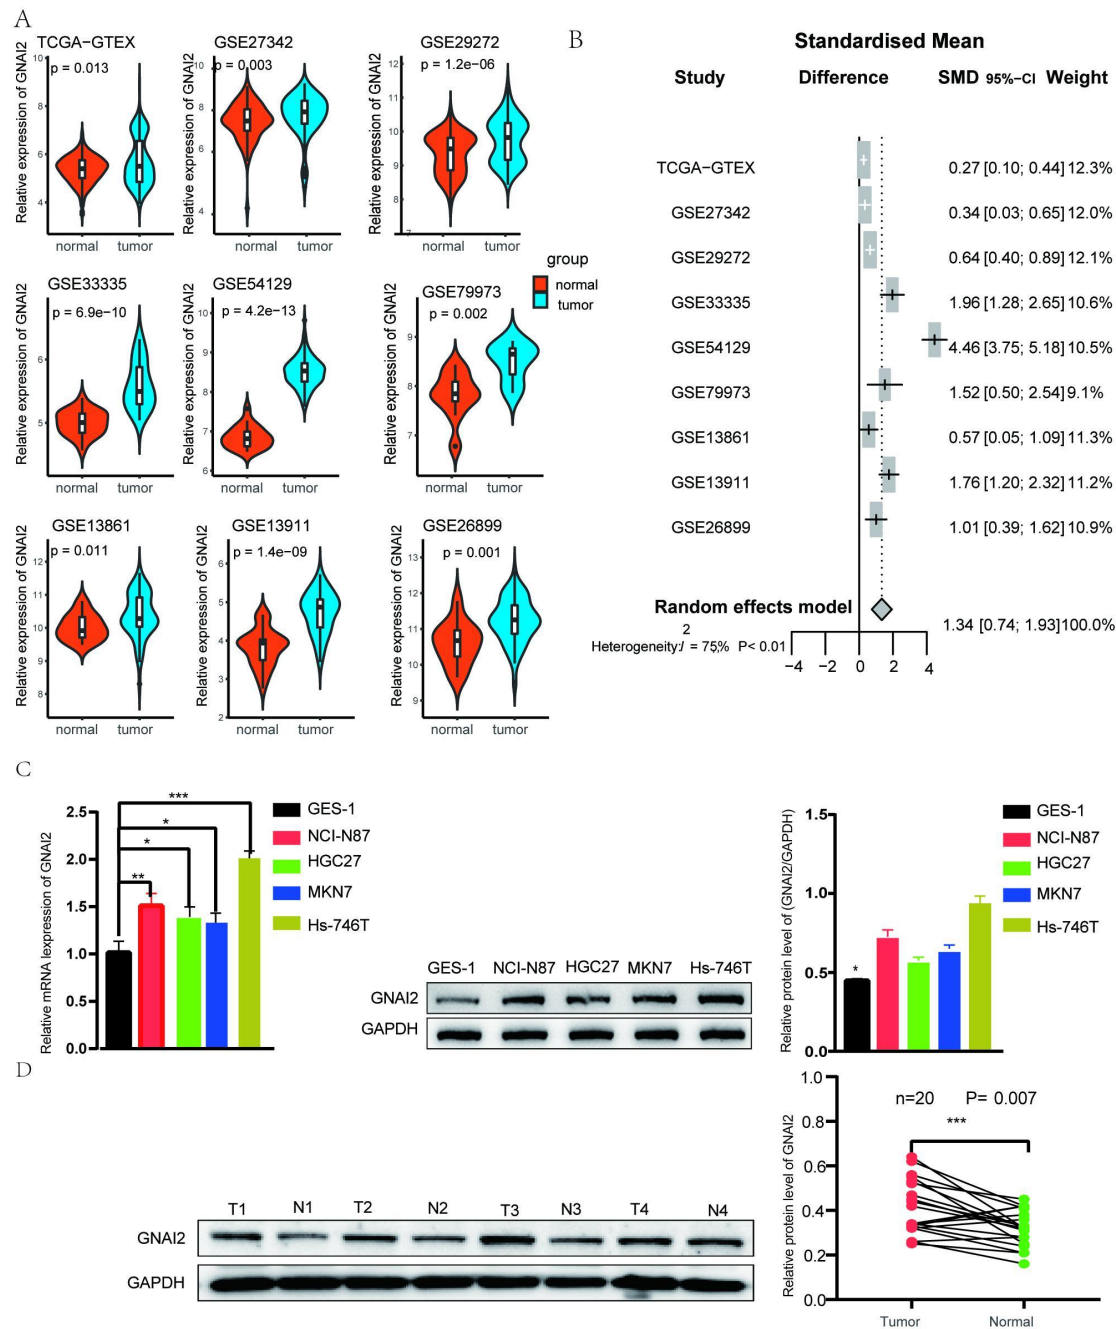

Figure S21: Expression of GNAI2 in GC. (A) Forest map of GNAI2 expression data from GEO , TCGA, and GTEx database. The 9 datasets were: TCGA-GTEX, GSE27342, GSE29272, GSE33335, GSE54129, GSE79973, GSE13861, GSE13911, and GSE26899. (B) MATE analysis of GNAI2 expression data from GEO , TCGA, and GTEx database. (C) Expression of GNAI2 mRNA in 5 cell lines was detected by quantitative RT-PCR (QPCR). The five cell lines are human gastric cancer cell lines Hs-746T, HGC27, MKN-7, NCI-N87 and the normal human cell line GES-1. (D) Quantitative RT-PCR (QPCR) was used to detect the expression of GNAI2 mRNA in 20 cases of gastric cancer and matched paracancerous tissues

Table-S1: Basic information of 5 datasets included in this study.

| Cohort            | Platform                                       | "Number of patients" | Stage                    | Sex                      | Histology                           | Survival data | Therapy                                     |
|-------------------|------------------------------------------------|----------------------|--------------------------|--------------------------|-------------------------------------|---------------|---------------------------------------------|
| GSE62254(ACRG)    | "Affymetrix Human Genome U133 Plus 2.0 Array"  | 300                  | "I/II:127<br>III/IV:173" | "Female:101<br>Male:199" | Diffuse:135;Intestinal:146;Mixed:19 | OS/RFS        | Partially pharmaceutical Therapy            |
| GSE84437          | "Illumina HumanHT-12 V3.0 expression beadchip" | 433                  | NA                       | "Female:137<br>Male:296" | NA                                  | OS            | NO                                          |
| TCGA: STAD        | Illumina RNAseq                                | 347                  | "I/II:154<br>III/IV:180" | "Female:123<br>Male:224" | Diffuse:61;Intestinal:157;Mixed:117 | OS            | Partially pharmaceutical Therapy            |
| GSE78220          | Illumina HiSeq 27                              | NA                   | NA                       | NA                       | NA                                  | OS            | aPD1/aPDL1 immunotherapy                    |
| IMvigor210 cohort | Illumina HiSeq                                 | 348                  | NA                       | Male:272; Female:76      | NA                                  | OS            | PD-L1/blockade(attezolizumab) immunotherapy |

Table-S2: Correlations between GNAI2 and 105 immunomodulators in STAD

|          | genelow.GNAI2 group | Mean        | high.GNAI2 group | Mean        | logFC       | pValue | fdr |
|----------|---------------------|-------------|------------------|-------------|-------------|--------|-----|
| CCL27    | 0.198283654         | 0.133503865 | -0.570684243     | 0.161680477 | 0.186085077 |        |     |
| CCL25    | 4.519030769         | 3.725616908 | -0.278534045     | 0.046426226 | 0.060255315 |        |     |
| HHLA2    | 7.957810577         | 6.61713285  | -0.266165314     | 0.000000734 | 0.00000166  |        |     |
| CCL28    | 7.539424038         | 6.676147826 | -0.175438416     | 0.00000135  | 0.00000293  |        |     |
| CCL20    | 9.327296635         | 8.362130435 | -0.157588453     | 0.00036607  | 0.00060352  |        |     |
| CCL15    | 7.038878846         | 6.326771498 | -0.153876163     | 0.000828073 | 0.001329275 |        |     |
| TNFRSF25 | 7.501345192         | 6.971638164 | -0.105651639     | 0.00000838  | 0.0000165   |        |     |
| CXCL3    | 8.707185577         | 8.207442512 | -0.085273732     | 0.016547316 | 0.023750266 |        |     |
| CXCL5    | 9.013638942         | 8.636780676 | -0.061616007     | 0.425314747 | 0.455161396 |        |     |
| CXCL14   | 10.07152933         | 9.720167633 | -0.051229669     | 0.144563813 | 0.169584473 |        |     |
| CXCL2    | 8.388357212         | 8.1721657   | -0.037669842     | 0.273978406 | 0.305862229 |        |     |
| ULBP1    | 3.597575962         | 3.513294686 | -0.034200558     | 0.584250791 | 0.61447066  |        |     |
| TNFSF15  | 6.637985096         | 6.506433816 | -0.028878373     | 0.22574077  | 0.255003462 |        |     |
| CXCL1    | 9.711139904         | 9.542875845 | -0.025216548     | 0.62161335  | 0.648178023 |        |     |
| TNFSF13  | 9.701897596         | 9.564438164 | -0.020586728     | 0.113512538 | 0.135769899 |        |     |
| PVR      | 10.80381106         | 10.65364106 | -0.020193734     | 0.094157078 | 0.115264789 |        |     |
| CCR6     | 6.877121635         | 6.785707246 | -0.019305673     | 0.312668086 | 0.34058488  |        |     |
| RAET1E   | 2.661504808         | 2.627615942 | -0.018487749     | 0.974860052 | 0.974860052 |        |     |
| TNFRSF14 | 10.35389663         | 10.30069082 | -0.007432725     | 0.504191612 | 0.534881536 |        |     |
| CXCL16   | 11.9163399          | 11.86571353 | -0.006142324     | 0.955939427 | 0.963839753 |        |     |
| CCR9     | 2.291754327         | 2.291559903 | -0.000122398     | 0.893188805 | 0.923466391 |        |     |
| CXCL17   | 7.489306731         | 7.490864734 | 0.000300093      | 0.925981505 | 0.94141453  |        |     |
| CXCL6    | 5.631483654         | 5.675575362 | 0.011251593      | 0.92208105  | 0.94141453  |        |     |
| ICOSLG   | 8.777329808         | 8.854442512 | 0.012619358      | 0.152497301 | 0.17718734  |        |     |
| TAP1     | 12.00930817         | 12.14783478 | 0.016546149      | 0.27577742  | 0.305862229 |        |     |
| TAP2     | 10.96102981         | 11.10198164 | 0.018433864      | 0.089892508 | 0.111906999 |        |     |
| TAPBP    | 12.99917163         | 13.17520628 | 0.019405859      | 0.003992914 | 0.006014019 |        |     |
| B2M      | 15.61940721         | 15.8864942  | 0.024461088      | 0.001513101 | 0.00230748  |        |     |
| NT5E     | 9.719791346         | 10.0245343  | 0.044537967      | 0.094479335 | 0.115264789 |        |     |
| CD276    | 10.82666827         | 11.22740531 | 0.05243521       | 8.02E-09    | 2.22E-08    |        |     |
| ENTPD1   | 10.27824519         | 10.79447826 | 0.07069954       | 3.91E-13    | 3.72E-12    |        |     |
| CCL16    | 1.080375            | 1.136049275 | 0.072493251      | 0.329535444 | 0.35578163  |        |     |
| MICB     | 7.322393269         | 7.712868116 | 0.074952183      | 0.000704458 | 0.001145919 |        |     |
| IL6R     | 7.819674038         | 8.295417391 | 0.085206103      | 0.0000234   | 0.0000425   |        |     |
| TNFSF9   | 6.093557692         | 6.509642512 | 0.095293533      | 0.052593251 | 0.067299973 |        |     |
| CXCL11   | 6.899454327         | 7.376824155 | 0.096517581      | 0.018713621 | 0.026242089 |        |     |
| CXCL10   | 8.15645             | 8.721715942 | 0.096670631      | 0.006113721 | 0.008986434 |        |     |
| CXCR6    | 6.646695192         | 7.2205657   | 0.119474675      | 0.0000125   | 0.0000235   |        |     |
| CCL24    | 3.576532692         | 3.891095652 | 0.121614817      | 0.098280706 | 0.118715308 |        |     |
| CXCR2    | 4.672330288         | 5.086289855 | 0.122471418      | 0.031374714 | 0.043008035 |        |     |
| SIGLEC15 | 3.737168269         | 4.070463285 | 0.123247482      | 0.04602792  | 0.060255315 |        |     |

|                 |             |             |             |             |             |
|-----------------|-------------|-------------|-------------|-------------|-------------|
| CXCL9           | 9.571663462 | 10.4297285  | 0.123860025 | 0.0000387   | 0.0000684   |
| CX3CL1          | 8.647605288 | 9.466442029 | 0.130521615 | 1.07E-08    | 2.77E-08    |
| CCL18           | 7.885143269 | 8.673317874 | 0.137447017 | 0.000322962 | 0.000539744 |
| CXCR4           | 9.850681731 | 10.8603942  | 0.140780993 | 6.43E-17    | 2.23E-15    |
| CD40            | 7.768252885 | 8.572115942 | 0.142061197 | 1.08E-10    | 4.88E-10    |
| CD80            | 4.790249519 | 5.286908213 | 0.142323473 | 0.000239251 | 0.000405398 |
| CCL58.929795673 | 9.908557488 | 0.150047877 | 7.82E-11    | 3.67E-10    |             |
| CCR1            | 7.316397596 | 8.12313285  | 0.150902761 | 2.31E-11    | 1.35E-10    |
| ICOS5.016339423 | 5.603392271 | 0.159665524 | 0.0000165   | 0.0000305   |             |
| CCL47.008720673 | 7.872555072 | 0.167680817 | 3.06E-09    | 9.84E-09    |             |
| CCL35.682352885 | 6.395152174 | 0.17049026  | 0.0000242   | 0.0000435   |             |
| CXCR3           | 6.375266346 | 7.186921256 | 0.172888263 | 9.12E-09    | 2.45E-08    |
| CD86            | 7.179828846 | 8.098959903 | 0.173787191 | 1.51E-14    | 2.62E-13    |
| XCL13.218545192 | 3.635729469 | 0.175836128 | 0.004606834 | 0.00685407  |             |
| TNFSF4          | 5.950250962 | 6.726086957 | 0.176816913 | 3.28E-09    | 1.03E-08    |
| IL2RA           | 6.071259615 | 6.869898068 | 0.178292827 | 6.75E-09    | 1.91E-08    |
| CCL22           | 6.391015865 | 7.232609179 | 0.178470927 | 1.03E-09    | 3.79E-09    |
| CCL11           | 6.713287981 | 7.64832657  | 0.188124594 | 2.33E-09    | 7.69E-09    |
| CCL28.410541346 | 9.583770531 | 0.188394703 | 4.28E-19    | 5.22E-17    |             |
| TNFRSF4         | 5.976675962 | 6.816593237 | 0.18970757  | 7.31E-17    | 2.23E-15    |
| BTNL2           | 0.285359615 | 0.325741063 | 0.19094442  | 0.279782722 | 0.307508938 |
| TNFSF13B        | 6.219943269 | 7.117875362 | 0.194545249 | 1.34E-12    | 1.17E-11    |
| CD48            | 7.44538125  | 8.536786473 | 0.197347369 | 3.32E-14    | 4.5E-13     |
| CCR5            | 6.505534615 | 7.464770048 | 0.198430199 | 2.32E-12    | 1.77E-11    |
| KLRC1           | 2.245726923 | 2.577240097 | 0.198644437 | 0.021538052 | 0.029859572 |
| CXCR1           | 3.621472596 | 4.156871981 | 0.19892186  | 0.017224184 | 0.024434308 |
| CXCL12          | 8.600514904 | 9.872871014 | 0.199046644 | 1.68E-17    | 1.03E-15    |
| TNFRSF18        | 5.071080288 | 5.824315459 | 0.199795381 | 1.09E-09    | 3.83E-09    |
| CD28            | 5.536580769 | 6.374438164 | 0.203302905 | 7.89E-10    | 3.01E-09    |
| CCR3            | 2.221198077 | 2.563623188 | 0.206846172 | 0.052957356 | 0.067299973 |
| TNFRSF17        | 4.003758654 | 4.645885507 | 0.21459859  | 0.001003216 | 0.001569132 |
| CD40LG          | 4.350635096 | 5.062644928 | 0.218665285 | 0.00000141  | 0.00000303  |
| TNFSF18         | 1.835611538 | 2.13641401  | 0.218930469 | 0.054222882 | 0.068197851 |
| TMIGD2          | 2.743511538 | 3.202047826 | 0.222971213 | 0.000977191 | 0.001548277 |
| CD70            | 3.952286538 | 4.655983092 | 0.236398274 | 0.00000367  | 0.00000733  |
| CD27            | 6.469114423 | 7.656231401 | 0.243066204 | 2.62E-12    | 1.88E-11    |
| KLRK1           | 5.007294712 | 5.988545894 | 0.258174368 | 4.03E-09    | 1.23E-08    |
| TNFRSF9         | 4.819384615 | 5.78595942  | 0.263707264 | 3.9E-11     | 2.07E-10    |
| CXCL13          | 7.212778365 | 8.669927053 | 0.265464762 | 1.85E-09    | 6.27E-09    |
| TNFRSF8         | 4.234486538 | 5.090518357 | 0.265625527 | 7.23E-11    | 3.53E-10    |
| CCR10           | 4.329586058 | 5.224645894 | 0.271104162 | 4.53E-15    | 9.21E-14    |
| CX3CR1          | 4.710705288 | 5.705911594 | 0.276514318 | 2.32E-11    | 1.35E-10    |
| TNFRSF13C       | 3.734849038 | 4.535950242 | 0.280354883 | 0.0000677   | 0.000116379 |
| CCR7            | 5.781938942 | 7.062145411 | 0.288553153 | 2.69E-13    | 2.99E-12    |

|                 |             |             |             |             |             |  |
|-----------------|-------------|-------------|-------------|-------------|-------------|--|
| IL6             | 5.384786538 | 6.584602899 | 0.290207282 | 7.31E-08    | 0.000000182 |  |
| CCL26           | 3.176739904 | 3.889987923 | 0.292218702 | 0.0000529   | 0.0000922   |  |
| CCL84.598076923 | 5.653436232 | 0.298097421 | 4.27E-09    | 1.27E-08    |             |  |
| CCR8            | 3.216197115 | 3.95876715  | 0.299695383 | 7.03E-08    | 0.000000179 |  |
| CCR4            | 4.486741827 | 5.54438744  | 0.305359904 | 7.02E-11    | 3.53E-10    |  |
| TNFSF14         | 3.2589375   | 4.03762657  | 0.309105801 | 4.92E-10    | 1.94E-09    |  |
| XCL22.795720673 | 3.46373913  | 0.309110053 | 0.00000364  | 0.00000733  |             |  |
| CCL21           | 7.243339423 | 9.062372947 | 0.323233882 | 2.6E-16     | 6.35E-15    |  |
| CCR2            | 4.502656731 | 5.701731401 | 0.340623583 | 2.27E-13    | 2.77E-12    |  |
| LTA             | 3.561123558 | 4.520178261 | 0.344047176 | 1.84E-12    | 1.5E-11     |  |
| CCL14           | 5.431953846 | 6.951679227 | 0.355890292 | 3.96E-13    | 3.72E-12    |  |
| CCL13           | 3.703959615 | 4.903180676 | 0.404649555 | 1.77E-10    | 7.43E-10    |  |
| CCL72.037554327 | 2.698871498 | 0.405517761 | 0.001154478 | 0.001782864 |             |  |
| CXCR5           | 4.288045192 | 5.684474879 | 0.406706971 | 2.08E-11    | 1.34E-10    |  |
| CCL10.45849375  | 0.625084058 | 0.447148141 | 0.035239724 | 0.047769404 |             |  |
| XCR1            | 2.25205     | 3.122742512 | 0.471574757 | 0.00000115  | 0.00000256  |  |
| CCL19           | 4.810107692 | 6.906471981 | 0.521879735 | 1.79E-14    | 2.73E-13    |  |
| CCL17           | 2.320450962 | 3.339785507 | 0.525350242 | 2.65E-11    | 1.47E-10    |  |
| TNFRSF13B       | 2.857602404 | 4.134934783 | 0.533059376 | 1.1E-09     | 3.83E-09    |  |
| CCL23           | 1.801689423 | 2.696814493 | 0.581905946 | 0.000000086 | 0.000000206 |  |

Table-S3(CTLA4):Correlation between GNAI2 and CTLA4 in pan-cancers

| type | cor          | p.value     |
|------|--------------|-------------|
| ACC  | 0.350721268  | 0.001764784 |
| BLCA | 0.311535246  | 1.31E-10    |
| BRCA | 0.169509894  | 1.77E-08    |
| CESC | 0.193885762  | 0.000676584 |
| CHOL | 0.45350749   | 0.005471503 |
| COAD | 0.492575566  | 6.91E-19    |
| DLBC | 0.54284543   | 0.0000807   |
| ESCA | 0.365728834  | 0.000000413 |
| GBM  | 0.175088814  | 0.027282863 |
| HNSC | 0.401700177  | 1.66E-21    |
| KICH | 0.450947489  | 0.000144775 |
| KIRC | 0.246371731  | 9.07E-09    |
| KIRP | 0.281048077  | 0.00000125  |
| LAML | 0.110098857  | 0.149298514 |
| LGG  | 0.160165202  | 0.000281631 |
| LIHC | 0.180667524  | 0.000487603 |
| LUAD | 0.37747701   | 8.1E-19     |
| LUSC | 0.400469227  | 1.32E-20    |
| MESO | 0.309457116  | 0.00353836  |
| OV   | 0.315600937  | 3.26E-11    |
| PAAD | 0.372970937  | 0.000000294 |
| PCPG | -0.06534547  | 0.387516836 |
| PRAD | 0.332817413  | 2.87E-14    |
| READ | 0.422148644  | 0.0000307   |
| SARC | 0.388387066  | 1.02E-10    |
| SKCM | 0.409827145  | 2.66E-20    |
| STAD | 0.426688665  | 9.55E-20    |
| TGCT | 0.078262418  | 0.372401675 |
| THCA | 0.301828191  | 4.48E-12    |
| THYM | -0.125359767 | 0.174322691 |
| UCEC | 0.163666125  | 0.02813931  |
| UCS  | 0.116317831  | 0.388877543 |
| UVM  | 0.127524546  | 0.262723851 |

Table-S3(PD-L1):Correlation between GNAI2 and PD-L1 in pan-cancers

| type | cor         | p.value     |
|------|-------------|-------------|
| ACC  | 0.055502654 | 0.631627382 |
| BLCA | 0.344495496 | 8.77E-13    |
| BRCA | 0.227955139 | 2.51E-14    |
| CESC | 0.228476502 | 0.0000581   |
| CHOL | 0.378173763 | 0.022956409 |
| COAD | 0.547528123 | 9.03E-24    |
| DLBC | 0.540674457 | 0.0000873   |
| ESCA | 0.373261547 | 0.000000228 |
| GBM  | 0.303415838 | 0.000101158 |
| HNSC | 0.366356378 | 6.73E-18    |
| KICH | 0.534842508 | 0.00000372  |
| KIRC | 0.252047345 | 0.000000004 |
| KIRP | 0.427882967 | 3E-14       |
| LAML | 0.089226671 | 0.243042545 |
| LGG  | 0.325211346 | 5E-14       |
| LIHC | 0.229441346 | 0.00000851  |
| LUAD | 0.433732828 | 6.04E-25    |
| LUSC | 0.426461218 | 2E-23       |
| MESO | 0.14915866  | 0.167936806 |
| OV   | 0.361019    | 1.95E-14    |
| PAAD | 0.38102885  | 0.000000155 |
| PCPG | 0.053827879 | 0.476727674 |
| PRAD | 0.482751294 | 2.91E-30    |
| READ | 0.515544123 | 0.00000017  |
| SARC | 0.17127041  | 0.00581455  |
| SKCM | 0.307807817 | 1.1E-11     |
| STAD | 0.5017664   | 8.75E-28    |
| TGCT | 0.027916174 | 0.750679278 |
| THCA | 0.290718536 | 2.84E-11    |
| THYM | 0.331485344 | 0.000230872 |
| UCEC | 0.251373985 | 0.000664399 |
| UCS  | 0.033986974 | 0.801826694 |
| UVM  | 0.137921734 | 0.225459389 |

Table-S3(PD-1):Correlation between GNAI2 and PD-1 in pan-cancers

| type | cor          | p.value     |
|------|--------------|-------------|
| ACC  | 0.251025184  | 0.02765841  |
| BLCA | 0.33244609   | 5.86E-12    |
| BRCA | 0.290464127  | 1.18E-22    |
| CESC | 0.109444033  | 0.05663851  |
| CHOL | 0.519660874  | 0.001161704 |
| COAD | 0.462795187  | 1.38E-16    |
| DLBC | 0.587496314  | 0.0000142   |
| ESCA | 0.262338708  | 0.000360203 |
| GBM  | 0.386758019  | 0.000000476 |
| HNSC | 0.390562484  | 2.54E-20    |
| KICH | 0.226936186  | 0.066891866 |
| KIRC | 0.166673405  | 0.000115707 |
| KIRP | 0.188676182  | 0.001295579 |
| LAML | 0.080813404  | 0.290530587 |
| LGG  | 0.347559707  | 6.31E-16    |
| LIHC | 0.468161111  | 1.69E-21    |
| LUAD | 0.483941451  | 1.78E-31    |
| LUSC | 0.167780328  | 0.000168925 |
| MESO | 0.258439924  | 0.015652709 |
| OV   | 0.510100126  | 2.47E-29    |
| PAAD | 0.561742833  | 3.42E-16    |
| PCPG | 0.08991005   | 0.234002275 |
| PRAD | 0.484870316  | 1.5E-30     |
| READ | 0.434451937  | 0.0000169   |
| SARC | 0.339393164  | 2.25E-08    |
| SKCM | 0.41866067   | 3.36E-21    |
| STAD | 0.27338436   | 1.57E-08    |
| TGCT | 0.267937747  | 0.001895796 |
| THCA | 0.154868088  | 0.000484432 |
| THYM | -0.032621221 | 0.724693445 |
| UCEC | 0.287922263  | 0.0000888   |
| UCS  | 0.322606816  | 0.01438527  |
| UVM  | 0.200767337  | 0.076041986 |

Table-S3(LAG-3):Correlation between GNAI2 and LAG-3 in pan-cancers

| type | cor          | p.value     |
|------|--------------|-------------|
| ACC  | 0.194862742  | 0.089457364 |
| BLCA | 0.322166244  | 2.78E-11    |
| BRCA | 0.102168906  | 0.000725789 |
| CESC | 0.180367521  | 0.001589659 |
| CHOL | 0.241395499  | 0.156093821 |
| COAD | 0.527301629  | 7.2E-22     |
| DLBC | 0.40669041   | 0.004556815 |
| ESCA | 0.321399903  | 0.0000103   |
| GBM  | 0.13761797   | 0.083657973 |
| HNSC | 0.300021597  | 3.1E-12     |
| KICH | 0.536488272  | 0.00000343  |
| KIRC | 0.234372002  | 4.78E-08    |
| KIRP | 0.292902558  | 0.000000418 |
| LAML | 0.003579157  | 0.962724175 |
| LGG  | 0.153746606  | 0.000493416 |
| LIHC | 0.187534445  | 0.000291898 |
| LUAD | 0.301305286  | 3.16E-12    |
| LUSC | 0.339943804  | 6.16E-15    |
| MESO | -0.104586036 | 0.335020268 |
| OV   | 0.442996721  | 1.04E-21    |
| PAAD | 0.303082872  | 0.0000392   |
| PCPG | 0.002823924  | 0.970242816 |
| PRAD | 0.269500508  | 1.1E-09     |
| READ | 0.398002723  | 0.0000935   |
| SARC | 0.120517883  | 0.053179939 |
| SKCM | 0.291299004  | 1.45E-10    |
| STAD | 0.321559683  | 2.06E-11    |
| TGCT | 0.077641047  | 0.376221276 |
| THCA | 0.266546935  | 1.21E-09    |
| THYM | -0.370818193 | 0.000033    |
| UCEC | 0.257966845  | 0.000471862 |
| UCS  | 0.222713379  | 0.09587603  |
| UVM  | 0.156438771  | 0.168577565 |

Table-S4: Comparisons of the effector genes of tumor associated immune cells between GNAI2 groups

| genelow.GNAI2 group | Mean        | high.GNAI2 group | Mean        | logFC       | pValue      | fdr | TILs.type      |
|---------------------|-------------|------------------|-------------|-------------|-------------|-----|----------------|
| C1QA                | 10.19819856 | 11.32584251      | 0.151304042 | 2.26E-17    | 3.96E-16    |     | Macrophage     |
| C1QB                | 11.00768077 | 12.07939324      | 0.134037452 | 5.39E-14    | 2.36E-13    |     | NK_cell        |
| CCL47.008720673     | 7.872555072 | 0.167680817      | 3.06E-09    | 5.11E-09    |             |     | Th1_cell       |
| CCL58.929795673     | 9.908557488 | 0.150047877      | 7.82E-11    | 1.52E-10    |             |     | CD8_T_cell     |
| CD8A                | 7.138725    | 8.270964734      | 0.21238919  | 2E-11       | 4.66E-11    |     | CD8_T_cell     |
| CD8B                | 5.375137981 | 6.224290821      | 0.21160768  | 0.000000812 | 0.00000109  |     | CD8_T_cell     |
| CLEC5A              | 5.208039423 | 5.939525121      | 0.189607219 | 0.00000679  | 0.00000849  |     | Macrophage     |
| CRTAM               | 3.374136058 | 4.381327536      | 0.376849921 | 9.29E-09    | 1.36E-08    |     | NK_cell        |
| CSF1R               | 9.167404808 | 10.21715024      | 0.156407572 | 5.17E-16    | 3.62E-15    |     | Macrophage     |
| CTLA4               | 5.442105288 | 6.094402899      | 0.16332001  | 0.000000283 | 0.000000397 |     | Th1_cell       |
| CXCL10              | 8.15645     | 8.721715942      | 0.096670631 | 0.006113721 | 0.006686883 |     | CD8_T_cell     |
| CXCR3               | 6.375266346 | 7.186921256      | 0.172888263 | 9.12E-09    | 1.36E-08    |     | CD8_T_cell     |
| CYBB                | 9.498722596 | 10.38698551      | 0.128971603 | 1.37E-11    | 3.7E-11     |     | Macrophage     |
| FGL2                | 8.995864904 | 10.26741498      | 0.1907391   | 1.19E-15    | 6.94E-15    |     | Dendritic_cell |
| FLT3LG              | 6.285259615 | 7.163284541      | 0.188648913 | 3.15E-21    | 1.1E-19     |     | CD8_T_cell     |
| GZMA                | 6.465986538 | 7.083527536      | 0.131597485 | 0.0000608   | 0.0000687   |     | CD8_T_cell     |
| GZMB                | 6.579435096 | 7.263755072      | 0.142751836 | 0.0000576   | 0.0000672   |     | CD8_T_cell     |
| GZMM                | 3.421966346 | 4.580202899      | 0.420585938 | 3.96E-13    | 1.39E-12    |     | CD8_T_cell     |
| IFNG2.700511538     | 3.167035266 | 0.22990022       | 0.015157836 | 0.016076492 |             |     | CD8_T_cell     |
| IL21R               | 5.691545673 | 6.83514058       | 0.264150507 | 3.42E-14    | 1.71E-13    |     | Dendritic_cell |
| IL7R                | 6.784334135 | 7.640292754      | 0.171420693 | 3.92E-09    | 6.23E-09    |     | NK_cell        |
| LILRA2              | 3.102561058 | 4.047504348      | 0.383573028 | 1.8E-11     | 4.5E-11     |     | Macrophage     |
| LILRB4              | 7.192247115 | 8.261148792      | 0.199899826 | 7.12E-13    | 2.08E-12    |     | Dendritic_cell |
| MARCO               | 3.473273558 | 4.673281643      | 0.428139943 | 0.00000148  | 0.00000192  |     | Macrophage     |
| MMP8                | 1.768528846 | 2.093381643      | 0.243285601 | 0.248723222 | 0.256038611 |     | Macrophage     |
| MS4A6A              | 8.4077125   | 9.318733816      | 0.148420604 | 5.43E-13    | 1.73E-12    |     | Macrophage     |
| NCR1                | 1.722503365 | 2.263765217      | 0.394217538 | 0.0000242   | 0.0000292   |     | NK_cell        |
| PRF1                | 6.848000962 | 7.743855556      | 0.177369138 | 7.66E-11    | 1.52E-10    |     | CD8_T_cell     |
| PRR5L               | 7.595307692 | 7.672862802      | 0.014656548 | 0.411429335 | 0.411429335 |     | NK_cell        |
| SIGLEC1             | 7.546057692 | 8.595807729      | 0.187910083 | 4E-11       | 8.74E-11    |     | Dendritic_cell |
| SLAMF1              | 4.907245192 | 5.727775362      | 0.223061555 | 9.82E-10    | 1.8E-09     |     | Th1_cell       |
| SLAMF8              | 8.199399519 | 9.13441401       | 0.155793922 | 2.79E-13    | 1.09E-12    |     | Dendritic_cell |
| SLC15A3             | 8.854234135 | 9.724678261      | 0.135282996 | 9.51E-17    | 1.11E-15    |     | Dendritic_cell |
| SPON2               | 9.897459135 | 10.79503865      | 0.125238298 | 1.52E-16    | 1.33E-15    |     | NK_cell        |
| TBX21               | 3.809260577 | 4.651284058      | 0.288118069 | 1.03E-09    | 1.8E-09     |     | CD8 T cell     |

Table-S5(XCELL): Infiltration level of tumor associated immune cells in STAD estimated by using xCell algorithms.

| sample          | aDC         | Adipocytes  | Astrocytes  | B.cells     | Basophils   | CD4..memory.T.cells | CD4..naive.T.cells | CD4..T.cells | CD4..Tcm    | CD4..Tem   | CD8..naive.T.cells | CD8..T.cells | CD8..Tcm    | CD8..Tem | cDC         | Chondrocytes | Class.switched.memory.B.cells | CLP         | CMPDC    | Endothelial.cells | Eosinophils | Epithelial.cells | Erythrocytes | Fibroblasts | GMP         | Hepatocytes | HSC         | iDC         | Keratinocytes | ly.Endothelial.cells | Macrophages | Macrophages.M1 | Macrophages.M2 | Mast.cells  | Megakaryocytes | Melanocytes | Memory.B.cells | MEP         | Mesangial.cells | Monocytes   | MPP         | MSC      | mv.Endothelial.cells | Myocytes    | naive.B.cells | Neurons     | Neutrophils | NK.cells    | NKT      | Osteoblast  | pDC      | Pericytes   | Plasma.cells | Platelets   | Preadipocytes | pro.B.cells | Sebocytes   | Skeletal.muscle | Smooth.muscle | Tgd.cells   | Th1.cells   | Th2.cells   | Tregs       | ImmuneScore | StromaScore | MicroenvironmentScore |             |
|-----------------|-------------|-------------|-------------|-------------|-------------|---------------------|--------------------|--------------|-------------|------------|--------------------|--------------|-------------|----------|-------------|--------------|-------------------------------|-------------|----------|-------------------|-------------|------------------|--------------|-------------|-------------|-------------|-------------|-------------|---------------|----------------------|-------------|----------------|----------------|-------------|----------------|-------------|----------------|-------------|-----------------|-------------|-------------|----------|----------------------|-------------|---------------|-------------|-------------|-------------|----------|-------------|----------|-------------|--------------|-------------|---------------|-------------|-------------|-----------------|---------------|-------------|-------------|-------------|-------------|-------------|-------------|-----------------------|-------------|
| TCGA-3M-AB46-01 | 0.030395645 | 0           | 0.077225588 | 0.017495712 | 4.31E-18    | 0.003659172         | 6.66E-18           | 0            | 3.08E-18    | 1.76E-18   | 0.035309156        | 2.91E-19     | 0           | 6.38E-18 | 0.002052711 | 0.010331626  | 0.000169149                   | 0.024159492 | 2.95E-18 | 0                 | 3.8E-18     | 0                | 0.539219463  | 1.34E-19    | 0.01103119  | 0           | 0.001683498 | 0.102575621 | 2.48E-18      | 0.07783177           | 0           | 0              | 0.00100523     | 0.001967425 | 0.002107976    | 0.000455063 | 8.15E-19       | 0.001140819 | 0.06448832      | 0.069706952 | 9.08E-19    | 2.72E-18 | 9.78E-18             | 0           | 1.2E-19       | 0.002758769 | 0.002985857 | 3.79E-21    | 0        | 0.014269333 | 0        | 0.00190446  | 0.008177954  | 0.005543001 | 0             | 3.41E-18    | 0.00390723  | 0.050655828     | 9.28E-19      | 0.284137551 | 9.58E-18    | 0.132729954 | 0.111911178 | 3.18E-18    | 0.013069125 | 0.005515595           | 0.01858472  |
| TCGA-3M-AB47-01 | 0.238193547 | 7.36E-20    | 0.04302646  | 0.063195    | 0           | 0.00888752          | 0.010548747        | 0            | 0.003323972 | 0.00916876 | 0.00321168         | 0.030330446  | 0.034250653 | 1.61E-18 | 0.026427591 | 0.134183721  | 0.031201884                   | 0.009312937 | 5.54E-19 | 0.008144245       | 0.153955924 | 0                | 0.39691118   | 0           | 0.146049065 | 7.64E-19    | 0.000240377 | 0.417082231 | 0             | 0.028389175          | 0.105224181 | 0.01063238     | 0.027470993    | 0.017865    | 2.94E-19       | 0.018351359 | 0              | 0.018794341 | 0.051216235     | 0.032106043 | 0           | 0        | 0                    | 0.078784286 | 1.74E-20      | 0.000979183 | 0.003963011 | 0           | 0        | 0.091742236 | 4.22E-18 | 4.36E-18    | 0.030900621  | 0.032035305 | 0             | 0           | 3.62E-18    | 0.027529645     | 0             | 0.431592163 | 5.74E-18    | 0.045680087 | 0.075725675 | 1.35E-17    | 0.074868047 | 0.150002495           | 0.224870542 |
| TCGA-B7-5816-01 | 0.275648289 | 0.050643492 | 0.142124083 | 0.035954696 | 0.145251568 | 0.001125054         | 0                  | 4.91E-18     | 4.57E-18    | 1.31E-18   | 0                  | 2.04E-18     | 0.032533034 | 0        | 0.033555935 | 0.107072374  | 0.031941947                   | 1.28E-19    | 3.09E-18 | 0.019793025       | 0.027355466 | 0                | 0.60923296   | 0           | 0.134480523 | 0           | 0.003876548 | 0.043532327 | 0.181693593   | 0.078322244          | 0.019242731 | 0.063247859    | 0.065562448    | 0.022640451 | 0.004934305    | 1.1E-20     | 0.004398415    | 6.73E-21    | 0.057805894     | 0.073530242 | 0.089208564 | 7.78E-18 | 0.16764947           | 0.015794136 | 0.004001102   | 9.93E-20    | 0           | 0.017265644 | 5.62E-18 | 0.018176894 | 0        | 0.064189335 | 0.205134108  | 0.013667575 | 4.37E-18      | 0           | 0.000135549 | 0.050832541     | 0             | 0.163524932 | 0.004458904 | 0.10898497  | 0.09432177  | 0.003621006 | 0.153602728 | 0.10623974            | 0.259842468 |

TCGA-B7-5818-01 0.27555429 0.004254294 0 0.05889465 0.165204193 1.67E-20  
0.023942794 0 9.67E-19 0.005112109 0.006171208 0.021866983 0.067245585  
0.00032949 0.019220224 3.68E-18 0.02663479 0 1.47E-18 0.011966992  
0.013191011 8.72E-19 0.441040315 0 0.009286456 8.22E-19 0.000297525  
0.050845605 0.062987631 0.034014799 0.00671416 0.10579323 0.067275548  
0.060495242 0 0 0.008541505 0.016884161 0.074030266 0.007546961  
0.006255226 0 0.218465695 0.023181221 3.66E-19 0 0.000122338 0 0  
0.081184629 0.022082065 0.057767455 0.120613745 0.009413994 0 1.8E-19  
0.010381465 0.026394939 2.37E-18 0.111695064 0 0.214689677 0.103270645  
2.18E-18 0.136518054 0.013365881 0.149883935

TCGA-B7-A5TI-01 0.22274316 0.00906572 0.023891494 0.035582347 0.035137138  
0.001435646 0 6.81E-19 0 4E-19 4.96E-19 2.14E-19 0.005710677 0  
0.010767612 0.018769221 0.018851456 0.011813454 0 0.004593387 0.077960513  
0.007301892 0.556053448 3.09E-19 0.011493733 1.45E-18 0.008641938 0.181867402  
0.02883435 0.041664544 0.060524974 0.024806215 0.020754143 0.038816245  
9.4E-20 0.0066402 0.001287169 0.013235914 0.070606454 0.010767058  
4.44E-19 0 0.158630357 0.039618088 0.00181852 0.001090125 0.000484387 0  
0 0.020780856 0 0.008203237 0.122773512 0.0240253 0 0 4.94E-18  
0.02287755 1.01E-18 0.340185634 4.42E-18 0.086710168 0.098171635 1.03E-17  
0.048189227 0.049259983 0.09744921

TCGA-B7-A5TJ-01 0 0 0 0 0.033530455 0.000933377 2.24E-18 0 0.022943546  
0.017254558 1.2E-21 0 2.11E-19 0 0.021158831 0.00983765 0.021594688  
0.002966406 0 0.008448754 0.008112487 0.015539968 0.651863499 3.26E-19  
0.023617595 0 0.004869032 0.070447539 0.21758279 0.078043352 0.015015203  
0.013230577 0.017761548 0.010266622 0.004779279 0.002238238 2.36E-18  
0.006158447 0.054748653 0.042452027 8.86E-18 0 0 0.007779374 2.92E-19 0  
0.001231595 0 1.97E-18 0.030116846 3E-18 0.005194289 0.057331988  
0.009761914 2.96E-18 0 0 0.048795928 0 0.294678619 0 0.087958655  
0.018536785 0 0.027999052 0.015865041 0.043864093

TCGA-B7-A5TK-01 0.442025637 0.00625201 0.081543031 0.058337538 0.08388605  
0.019131166 0.002760242 1.42E-18 0 0 0.031242479 0.165653559 0.204843936  
0.091119485 0.123482023 0.026258351 0.036243352 0.017844989 0 0.047051286  
0.041167566 1.74E-18 0.554010585 0 0.102194746 6.94E-20 0 0.12709797  
0.289732501 0.095079998 0.026659418 0.085607678 0.097675095 0.004917336  
0.001299522 0.005322801 0.009030975 7.17E-18 0.067248213 0.024606386  
0.028353852 1.03E-19 0.002878993 0.019806996 0 0 0.003152165 8.85E-20  
0.022417846 0.066153616 0 0.127126771 0.067678743 0.014068493 0  
1.49E-17 0 0.043264947 2.44E-19 0.410807278 8.05E-19 0.229515603 0.282215713  
6.78E-18 0.272480853 0.074807161 0.347288015

TCGA-B7-A5TN-01 0.101581303 0.005805712 0.107406463 5.35E-19 0 0 0.000644187  
3.22E-19 0.003070083 0 0.005177856 0 0.000638326 0 2E-20 0.033108255  
0.027111632 1.82E-19 2.01E-19 1.04E-18 0.01170837 0.004983002 0.639237775 0  
0.143500456 0 0.000785578 0.18440518 0 0.079563584 0.016417961  
0.016134337 0.028340737 0.020650839 0.001553791 0.000968603 0.004483793

|                 |             |             |             |             |             |             |             |             |
|-----------------|-------------|-------------|-------------|-------------|-------------|-------------|-------------|-------------|
|                 | 9.65E-19    | 0.074312261 | 0.074884477 | 1.38E-18    | 3.64E-19    | 0.134351132 | 0.006307584 | 0           |
|                 | 0           | 0.001028936 | 0           | 1.63E-18    | 0.033078857 | 0           | 0.001216617 | 0.096656649 |
|                 | 8.02E-19    | 0           | 0           | 0.043269125 | 0           | 0.294530138 | 0           | 0.065318347 |
|                 | 9.45E-20    | 0.015114086 | 0.080507269 | 0.095621355 |             |             |             |             |
| TCGA-BR-4187-01 | 0.173743351 | 0.0047429   | 0.057120669 | 0.015030658 | 0.016817987 |             |             |             |
|                 | 0.017137273 | 0           | 8.16E-18    | 4.51E-18    | 0           | 0.001885785 | 0.013379143 | 0.065965314 |
|                 | 0.344544797 | 0.140684298 | 0.002635896 | 0           | 0.017471391 | 0.054176098 | 0.116180391 |             |
|                 | 0.021328215 | 0.288731846 | 0           | 0.355178321 | 0.181465705 | 0.015075727 | 0.551153855 |             |
|                 | 0.909920146 | 0.029706948 | 0.045419463 | 0.070026095 | 0.063563646 | 0.049646303 |             |             |
|                 | 0.013966989 | 0.004548916 | 5.52E-19    | 0           | 0.05269946  | 0.020882275 | 0.104924445 | 0           |
|                 | 0           | 0.055927569 | 0           | 0           | 0.005673008 | 0.016505822 | 1.81E-17    | 0           |
|                 | 0.012595162 | 0.004031812 | 0.00370686  | 0           | 0.114690533 | 0           | 0.026757032 |             |
|                 | 2.48E-18    | 0.537222724 | 1.63E-18    | 1.73E-18    | 0.083380138 | 0           | 0.206224976 | 0.238050806 |
|                 | 0.444275782 |             |             |             |             |             |             |             |
| TCGA-BR-4191-01 | 0.230110126 | 8.59E-24    | 0.02865607  | 0.100300171 | 0.093720865 |             |             |             |
|                 | 0.025730055 | 0.034094319 | 5.12E-18    | 7.39E-18    | 1.87E-18    | 0.002686794 | 0.031076892 |             |
|                 | 0.045317933 | 5.48E-19    | 0.433147818 | 0.013563914 | 0.009838549 | 0.016093884 |             |             |
|                 | 3.91E-19    | 0.046562843 | 0.069303676 | 0.007341106 | 0.457140455 | 0           | 1.2E-19     |             |
|                 | 0.055667069 | 0.005335104 | 0.218543166 | 0.537904401 | 0.019954836 | 0.027990273 |             |             |
|                 | 0.136354048 | 0.073774728 | 0.074885056 | 0.004453521 | 0.003566669 | 0.002964041 |             |             |
|                 | 0.04323173  | 0.0623514   | 7.95E-21    | 0.065524642 | 2.38E-19    | 1.82E-18    | 0.032624984 |             |
|                 | 3.52E-19    | 0.005704842 | 0.000990831 | 0.013250671 | 0           | 0.04410866  | 7.94E-18    |             |
|                 | 0.064537935 | 0.029372368 | 0.012776049 | 8.27E-19    | 0           | 0           | 0.025207725 | 2.77E-19    |
|                 | 0.353087554 | 0.008296463 | 0.059047766 | 0.11087021  | 0.006733109 | 0.269909263 |             |             |
|                 | 0.034651838 | 0.304561101 |             |             |             |             |             |             |
| TCGA-BR-4201-01 | 0.187901756 | 0.004774368 | 0.054936134 | 0.036280915 | 0.056217889 |             |             |             |
|                 | 0.021058556 | 9.14E-20    | 1.18E-18    | 0           | 6.64E-18    | 0.017328219 | 0.001806128 | 0.019640908 |
|                 | 8.05E-18    | 0.11227976  | 0.093165677 | 0.002552196 | 0.016360256 | 0           | 0.022914294 |             |
|                 | 0.014979855 | 0           | 0.507906569 | 0.0000811   | 0.036185794 | 0.085199051 | 0           |             |
|                 | 0.195655169 | 0.321870685 | 0.098528422 | 0.0081877   | 0.052508506 | 0.035555992 |             |             |
|                 | 0.019825975 | 0.000278487 | 0           | 0.002849694 | 0.008386672 | 0.07120582  | 5.05E-18    |             |
|                 | 0.074539203 | 1E-19       | 0.214312554 | 0.003721015 | 1.49E-19    | 0.002280539 | 0.000836539 |             |
|                 | 0.019225074 | 9.26E-19    | 4.19E-19    | 0           | 0.064175331 | 1.72E-18    | 0.009412158 | 1.68E-18    |
|                 | 8.94E-18    | 0.056957302 | 0           | 0.503643505 | 2.14E-18    | 0.033566729 | 0.213250941 |             |
|                 | 1.24E-18    | 0.138368404 | 0.027970009 | 0.166338413 |             |             |             |             |
| TCGA-BR-4253-01 | 0.381366841 | 0           | 0           | 0.176711935 | 0.165839685 | 0.102966998 |             |             |
|                 | 0.017893834 | 0.011099963 | 0           | 0           | 0.027898225 | 0.204585364 | 0.319012402 |             |
|                 | 0.09084937  | 0.206274059 | 0           | 0.057985599 | 0.026686815 | 7.1E-19     | 0.034500809 |             |
|                 | 0.01437072  | 0           | 0.423514761 | 5.1E-22     | 0           | 0           | 0.001125253 | 0.040314706 |
|                 | 0.160943446 | 0.042003426 | 0.004045715 | 0.166661373 | 0.105202025 | 0.062095134 |             |             |
|                 | 0.009219424 | 0           | 5.5E-20     | 0.027475083 | 0.070253155 | 6.81E-19    | 0.052532542 |             |
|                 | 2.62E-18    | 0           | 0.00298121  | 2.66E-19    | 0.011404579 | 0           | 0.016702226 | 0.022064225 |
|                 | 0.006473121 | 0           | 0.183692883 | 0.001616472 | 0.013275325 | 0           | 3.31E-18    | 0.018769696 |
|                 | 0.028704755 | 0           | 0.288344276 | 0.02351061  | 0.181925506 | 0.500300672 | 3.35E-19    |             |

|                 |             |             |             |             |             |             |             |             |   |
|-----------------|-------------|-------------|-------------|-------------|-------------|-------------|-------------|-------------|---|
| 0.462718574     | 0.00718536  | 0.469903934 |             |             |             |             |             |             |   |
| TCGA-BR-4255-01 | 0.206943022 | 0.003880143 | 0.025646437 | 0.056964568 | 0.000574667 |             |             |             |   |
|                 | 0.00816854  | 0           | 8.21E-19    | 0           | 0           | 0.005471037 | 0.044806367 | 0.048172231 | 0 |
|                 | 0.099735904 | 0.218245031 | 0.008718476 | 0.021482403 | 0           | 0.013004118 | 0.055364877 |             |   |
|                 | 2.2E-21     | 0.399820433 | 0           | 0.289890324 | 0.018435484 | 0.002531859 | 0.253299416 |             |   |
|                 | 0.175262193 | 0.030331187 | 0.024947848 | 0.052692979 | 0.052112717 | 0.027524127 |             |             |   |
|                 | 0.000843744 | 0.008212178 | 0.000155499 | 0.006050778 | 0.070061458 | 0.016289465 |             |             |   |
|                 | 0.023518107 | 0           | 0           | 0.020102206 | 0.011205703 | 5.9E-21     | 0.005047132 | 0.00377088  |   |
|                 | 0           | 0.005831056 | 0           | 0.002484604 | 0.091398756 | 0.013060201 | 4.99E-20    | 0           |   |
|                 | 1.14E-17    | 0.016515647 | 0           | 0.54171138  | 3.65E-18    | 0.032862218 | 0.168507707 | 0           |   |
|                 | 0.130400509 | 0.174567672 | 0.30496818  |             |             |             |             |             |   |
| TCGA-BR-4256-01 | 0.384045563 | 0.018410353 | 0.068550311 | 0.022725123 | 0.267274035 |             |             |             |   |
|                 | 0.020780239 | 0           | 0           | 3.33E-18    | 4.4E-18     | 0.000332523 | 0           | 0.050244456 | 0 |
|                 | 0.083863403 | 0.074814128 | 0.004098953 | 1.07E-17    | 0.200958916 | 0.053046985 |             |             |   |
|                 | 0.096730402 | 9.73E-20    | 0.417066312 | 0.001011742 | 0.213090427 | 0.30031211  |             |             |   |
|                 | 0.002744958 | 0.176714182 | 0.512161111 | 0.051974755 | 0.04948993  | 0.114403826 |             |             |   |
|                 | 0.095075676 | 0.044792946 | 0.015518029 | 0.000321615 | 0.01362726  | 5.37E-18    |             |             |   |
|                 | 0.000876031 | 0.018884645 | 0.208502901 | 0.050401361 | 0.015261122 | 0.054480831 | 0           |             |   |
|                 | 1.34E-19    | 0.001104181 | 0.04496348  | 0           | 5.8E-19     | 2.56E-19    | 0.039297206 | 0.047814716 |   |
|                 | 0           | 0           | 1.01E-17    | 0.020131542 | 0.041861293 | 0.000115889 | 0.491186051 | 0           |   |
|                 | 0.033312058 | 0.254234575 | 1.85E-17    | 0.306106897 | 0.164115591 | 0.470222488 |             |             |   |
| TCGA-BR-4257-01 | 0.194043926 | 0.001606943 | 0.019126267 | 0.040958798 | 0.070433174 |             |             |             |   |
|                 | 0.031222873 | 0.000518813 | 1.46E-20    | 1.09E-18    | 0           | 1.02E-19    | 0.007111267 | 0.04853859  |   |
|                 | 4.21E-19    | 0.159148598 | 0.015510127 | 0.015056074 | 0.009046021 | 0           | 0.0293106   |             |   |
|                 | 0.013683856 | 6.77E-19    | 0.544699449 | 0.001031725 | 0           | 0           | 0.002193856 | 0.023633176 |   |
|                 | 0.260014248 | 0.070947102 | 0.005384785 | 0.120544057 | 0.067670341 | 0.074319879 |             |             |   |
|                 | 0.001550871 | 6.01E-21    | 0.005959377 | 0.009556778 | 0.061549401 | 0.016923612 |             |             |   |
|                 | 0.060828651 | 0           | 0.066891786 | 0.001385323 | 1.11E-19    | 0           | 0.0000839   | 0.013657584 |   |
|                 | 0.001428407 | 0.009899519 | 0           | 0.05986891  | 0.047667664 | 0.004218622 | 0           |             |   |
|                 | 1.65E-18    | 0.009152382 | 0.049592373 | 0.001781386 | 0.39063159  | 0.010929443 |             |             |   |
|                 | 0.069825173 | 0.178248987 | 0.000206756 | 0.183593491 | 0.0076454   | 0.19123889  |             |             |   |
| TCGA-BR-4267-01 | 0.166453399 | 2.94E-19    | 3.2E-18     | 0.05350522  | 0.007450496 | 0.013361982 |             |             |   |
|                 | 0           | 0.001937906 | 0.017929049 | 0.011044014 | 0.003043112 | 0.015594233 | 0.032126541 |             |   |
|                 | 1.12E-18    | 0.073908244 | 0           | 0.016481342 | 0.01717098  | 0           | 0.011269496 | 0.000804365 |   |
|                 | 0.001044958 | 0.599639185 | 4.36E-19    | 2.14E-18    | 0           | 0.003360599 | 0.029238417 |             |   |
|                 | 0.036197855 | 0.05631259  | 0.003626531 | 0.029067243 | 0.015165169 | 0.026130968 |             |             |   |
|                 | 0.008356443 | 0.002448493 | 5.75E-19    | 0.0         |             |             |             |             |   |

|                 |             |             |             |             |             |             |             |
|-----------------|-------------|-------------|-------------|-------------|-------------|-------------|-------------|
|                 | 0.072567262 | 3.64E-18    | 0.35342656  | 0           | 0.261160171 | 0.034047103 | 0.012395906 |
|                 | 0.351891473 | 0.886119393 | 0.028545463 | 0.041808104 | 0.078611398 | 0.046304724 |             |
|                 | 0.04731025  | 1.35E-19    | 0.01272368  | 0           | 6.88E-20    | 0.053139359 | 1.07E-19    |
|                 | 1.15E-17    | 0           | 0.020879028 | 0.011946012 | 0           | 0.007463721 | 0.020372655 |
|                 | 0           | 0.043778656 | 0.008723064 | 0.019718922 | 0           | 4.05E-17    | 1.47E-17    |
|                 | 0.054268499 | 0           | 0.664682567 | 0           | 1.48E-17    | 0.196413975 | 0           |
|                 | 0.217203516 | 0.189593543 | 0.406797059 |             |             |             |             |
| TCGA-BR-4280-01 | 0.196013144 | 1.08E-18    | 1.37E-17    | 0.054382756 | 0.107892302 | 0.03090668  |             |
|                 | 6.98E-19    | 7.22E-20    | 1.54E-18    | 0           | 0.009142169 | 0.021715457 | 0.048651154 |
|                 | 0           | 0.07873     |             |             |             |             |             |
|                 | 2.87E-18    | 0.012760813 | 0.01783309  | 0           | 0.011947817 | 9.02E-21    | 4.62E-18    |
|                 | 0.479431257 |             |             |             |             |             |             |
|                 | 1.01E-18    | 0           | 1.11E-17    | 0.000288647 | 0.003509047 | 0.081096561 | 0.04357674  |
|                 | 0.001202837 | 0.031684767 | 0.028995783 | 0.024445122 | 0.003920323 | 0           | 9.27E-19    |
|                 | 0.017343347 | 0.077112131 | 0           | 0.003847301 | 0           | 5.45E-18    | 0.001826847 |
|                 | 0.004994265 |             |             |             |             |             |             |
|                 | 0.002455793 | 0.000916113 | 0.003158828 | 1.01E-17    | 0.022496836 | 0.019656928 |             |
|                 | 0.059711195 | 0.035103182 | 0.038284749 | 0           | 3.67E-18    | 0.005364058 | 0.038468283 |
|                 | 0           | 0.236925383 | 0           | 0.168311017 | 0.161834559 | 0.01805894  | 0.087104833 |
|                 | 5.44E-19    |             |             |             |             |             |             |
|                 | 0.087104833 |             |             |             |             |             |             |
| TCGA-BR-4292-01 | 0.217793881 | 6.43E-19    | 0           | 0.089114026 | 0.144962665 | 0.032654101 |             |
|                 | 0.012286345 | 0.005060984 | 0           | 0           | 0.0069685   | 0.010649948 | 0.076779865 |
|                 | 0           |             |             |             |             |             |             |
|                 | 0.041627694 | 0           | 0.024829223 | 0.023485962 | 0           | 0.016718555 | 0           |
|                 | 0           |             |             |             |             |             |             |
|                 | 0.482612766 |             |             |             |             |             |             |
|                 | 1.07E-20    | 4.31E-18    | 0           | 0.002556377 | 3.56E-20    | 0.102378931 | 0.043984667 |
|                 | 0.002014223 |             |             |             |             |             |             |
|                 | 0.039869529 | 0.03486322  | 0.025600766 | 0.006148944 | 0           | 4.06E-19    | 0.021038348 |
|                 | 0.083751711 | 8.52E-20    | 0.00653227  | 0           | 0           | 0.002298129 | 3.56E-19    |
|                 | 0.005260182 |             |             |             |             |             |             |
|                 | 0.000460277 | 0.007087285 | 0.007719878 | 0.028485681 | 0.008580608 | 0.074525861 |             |
|                 | 0.030988006 | 0.020164552 | 0.001661641 | 0           | 0.010922269 | 0.038831884 | 2.85E-19    |
|                 | 0.22705468  | 0.008022932 | 0.15682829  | 0.176916914 | 0           | 0.12593428  | 2.47E-18    |
|                 | 0.12593428  |             |             |             |             |             |             |
| TCGA-BR-4294-01 | 0.049260942 | 0           | 2.43E-18    | 7.1E-19     | 0.133859168 | 7.92E-19    | 1.52E-17    |
|                 | 0           | 6.33E-18    | 0.002329251 | 1.31E-18    | 2.29E-17    | 5.87E-18    | 0.021518071 |
|                 | 2.15E-17    | 0           |             |             |             |             |             |
|                 | 0.01854868  | 0           | 0           | 0.001824202 | 2.72E-18    | 0.168684263 | 4.06E-20    |
|                 | 0           |             |             |             |             |             |             |
|                 | 0.085755767 |             |             |             |             |             |             |
|                 | 0.035090518 | 0.106674975 | 1.46E-18    | 0.007215108 | 0.012170276 | 0.006474107 |             |
|                 | 3.22E-20    | 0.024109145 | 0.012624897 | 0           | 0.003481645 | 0           | 0.069505128 |
|                 | 0           |             |             |             |             |             |             |
|                 | 0.034897464 | 2.37E-17    | 0.032572295 | 5.74E-19    | 0.007657354 | 0           | 0.067042012 |
|                 | 0.003198458 | 0           | 0           | 0.04756377  | 0.003518789 | 0           | 0.022038781 |
|                 | 1.29E-17    | 0           | 0           |             |             |             |             |
|                 | 0.002775212 | 0           | 0.576275578 | 1.7E-17     | 0.045022316 | 1.41E-17    | 0           |
|                 | 0.03812995  |             |             |             |             |             |             |
|                 | 0.000912101 | 0.039042051 |             |             |             |             |             |
| TCGA-BR-4357-01 | 0.250868689 | 1.84E-19    | 0.079620256 | 0.12432389  | 0.142556735 |             |             |
|                 | 0.030602859 | 1.02E-20    | 0           | 4.44E-18    | 0           | 0.010745559 | 0.011698997 |
|                 | 0.021556782 | 0           |             |             |             |             |             |
|                 | 0.093477241 | 0.010730254 | 0.019107144 | 0.020060475 | 1.09E-18    | 0.022916626 |             |
|                 | 0.00174095  | 8.45E-20    | 0.473678392 | 0           | 3.37E-18    | 0           | 0.00339156  |
|                 | 0.026167427 |             |             |             |             |             |             |
|                 | 0.25456963  | 0.051953512 | 0.000707288 | 0.109304834 | 0.068780925 | 0.056374913 |             |
|                 | 0.001696552 | 0           | 0.00839256  | 0.024826806 | 0.038372096 | 0.015028391 | 0.035673062 |
|                 | 0           | 0           | 0           | 5.87E-19    | 7.89E-19    | 0.000356535 | 0.000376607 |
|                 | 1.36E-17    | 6.07E-19    | 0           |             |             |             |             |
|                 | 0.063431552 | 2.81E-19    | 0.032606439 | 1E-18       | 0           | 0.017081382 | 0.037176028 |
|                 | 0.00120336  | 0.365039097 | 0.000871351 | 0.096971186 | 0.202489702 | 5.44E-18    |             |

0.203993712 0.000870475 0.204864187  
 TCGA-BR-4361-01 0.235980692 8.93E-20 0.117709708 0.05509746 0.037478963  
 0.052269262 0.004902215 0.013939932 4.98E-19 0 0.02161709 0.062287253  
 0.103272686 6.64E-19 0.067359799 0.060235679 0.019121149 0.029141476 0  
 0.01393564 3.74E-19 0 0.381625292 0.001071852 2.86E-18 0.029585245 0  
 0.084398599 0.065960607 0.033862215 0 0.091039469 0.072579979 0.03380681  
 0.004966818 0 0 0.003380188 0.087867892 0.000589189 0.026168122  
 3.62E-18 8.92E-18 0 0 0.000489181 0.001286314 0.000270326 0 0 0  
 0.039344733 0 0.006970096 3.88E-19 0 0.004114689 0.018821016 0  
 0.445077082 0.015227892 0.021344185 0.301452043 0.03234548 0.178470013  
 1.66E-18 0.178470013  
 TCGA-BR-4362-01 0.242571956 0 0 0.136141026 0.132462286 0.037891153 0  
 3.13E-19 0 0 0.011148384 0.019378751 0.07459485 0.002825849 0.055333102  
 0 0.032685664 0.005793934 4.03E-18 0.01235427 0.012047256 6.71E-18  
 0.542063458 3.57E-19 0 6.5E-18 0.000933423 0.018446922 0.060357496  
 0.057584208 0.004735953 0.055202551 0.042256029 0.028050448 0.009770691 0  
 0.000340888 0.023046549 0.067734225 0.002360937 0.039725093 0 2.52E-18  
 0.006166602 0 0.007992913 0.000540705 0.00525437 2.63E-18 0.016463944 0  
 0.055978145 0.050645624 0.040103303 0 0 0.01511619 0.031231687  
 4.87E-19 0.333341379 1.93E-18 0.107058089 0.328000143 0 0.185217835  
 0.006023628 0.191241463  
 TCGA-BR-4363-01 0.237315404 0.00797831 0.072302084 0.118743851 0.013171151  
 0.02236659 0.025514541 0.001047989 1.65E-19 1.21E-18 0.012641257 0.048925541  
 0.063927553 1.47E-19 0.043281133 0.072320302 0.045450925 0.019428332 0  
 0.005520444 0.0000201 0 0.289336324 0 0.060105672 0.032802201  
 8.05E-21 0.071551009 0 0.017094907 0 0.062048931 0.034077011 0.041751811  
 0.009791065 0 0.01163079 0.009178465 0.044757099 0.009480688 0.038738857  
 0 0.020070052 1.11E-18 0.003297514 0.001085159 0.001846793 0.00155432  
 2.04E-18 0.012479335 4.63E-18 0.025511173 0.004776293 0.019871696 2.29E-19  
 3.05E-19 0.002458876 0.014181104 1.02E-19 0.487708514 0.004392809 0.043716523  
 0.19638417 0 0.190913999 0.03405202 0.22496602  
 TCGA-BR-4366-01 0.09030217 0 5.11E-19 0.011164601 0.084323327 0.012139284 0  
 0 7.87E-18 0 0.021441172 0.009409176 0.004239436 0 0.017597767  
 0.000175766 0.002834282 0.028802959 0 0 9.92E-19 0 0.442197967 0 0  
 9.53E-18 0.008420345 0.028915078 0.074166855 0.031351875 0 0.046863692  
 0.027509641 0.034908287 0 0.001112915 1.75E-18 0.009043654 0.040711116  
 0.006667862 0.01350542 4.87E-18 0 0 0.003517315 2.91E-20 0.002309724 0  
 0 6.07E-18 0 0.00292735 1.31E-17 0.013095192 0 1.25E-17 0 0.029003737  
 0 0.320374289 0.005757882 0.000784443 0.057196981 6.19E-20 0.053961926  
 4.96E-19 0.053961926  
 TCGA-BR-4367-01 0.232844989 4.16E-20 0 0.068294521 0.040924889 0.050492244  
 0.010478019 0 4.64E-19 0 0.003463659 0.027053883 0.078308663 1.12E-18  
 0.095434995 0.054883463 0.011924457 0.01447659 0 0.021423752 0.042328496  
 0 0.550793007 0.000202857 0.071005582 0.046853036 0.004011711 0.152370887

|                 |             |             |             |             |             |             |
|-----------------|-------------|-------------|-------------|-------------|-------------|-------------|
|                 | 0.190558632 | 0.062507502 | 0.018405941 | 0.110409965 | 0.084964463 | 0.049993237 |
|                 | 0.013684484 | 0.004750864 | 3.46E-19    | 0.014062841 | 0.045982803 | 0.016352433 |
|                 | 0.056586834 | 0           | 0           | 0.011778545 | 3.55E-19    | 0.003393298 |
|                 | 0.000931638 | 0.011314334 | 7.75E-18    | 0           | 0           | 0.060463794 |
|                 | 0.038932638 | 0.013708837 | 0           | 2.22E-18    | 1.34E-17    | 0.041024028 |
|                 | 0           | 0.511178785 | 0           | 0.053033242 | 0.208855288 | 0.003026718 |
|                 | 0.205845183 | 0.056667039 | 0.262512222 |             |             |             |
| TCGA-BR-4368-01 | 0.343511316 | 0           | 0           | 0.108148095 | 0.073398635 | 0.0425948   |
|                 | 0.006139049 | 0.001693403 | 0           | 7.76E-18    | 0.020514032 | 0.074344372 |
|                 | 0.083230514 | 0.016114996 | 0.108674251 | 0.040859202 | 0.01952079  | 0.019554641 |
|                 | 4.75E-19    | 0.027427273 | 0.039878256 | 0.00342023  | 0.404778807 | 0.000603927 |
|                 | 0.138747201 | 0.062633875 | 0           | 0.112799024 | 0.170069354 | 0.053672493 |
|                 | 0.013180879 | 0.055775541 | 0.046740795 | 0.018499731 | 0.022077211 | 0.000718048 |
|                 | 1.2E-18     | 0.017769974 | 0.054770152 | 0.028131541 | 0.032633317 | 2.44E-18    |
|                 | 0           | 0.020181858 | 0.003681921 | 0.023014725 | 0.000874295 | 0.000141058 |
|                 | 0.003565468 | 3.27E-18    | 0           | 0.056161222 | 0           | 0.00949745  |
|                 | 0.005619006 | 0           | 0.001959607 | 0.009815242 | 3.02E-19    | 0.561418455 |
|                 | 0           | 0.023417306 | 0.358117018 | 0           | 0.219483979 | 0.089312728 |
|                 | 0.308796708 |             |             |             |             |             |
| TCGA-BR-4369-01 | 0.14489358  | 4.07E-19    | 0.0171313   | 0.071558926 | 0.091375574 |             |
|                 | 0.011526129 | 0.015474225 | 1.07E-18    | 4.39E-19    | 1.64E-17    | 0.01289164  |
|                 | 0.031752484 | 3.43E-19    | 1.72E-18    | 0.199495552 | 0.071719507 | 0.005528757 |
|                 | 0.013628579 | 0           | 0.013354917 | 1.12E-18    | 0           | 0.358087799 |
|                 | 0.000611747 | 0           | 5.94E-21    | 0.020561549 | 0.096641856 | 0.113605838 |
|                 | 0.024868423 | 6.75E-20    | 0.02401277  | 0.013878531 | 0.031402523 | 0.01065764  |
|                 | 0           | 1.72E-18    | 0.015930782 | 0.076358258 | 0.051003295 | 0.010222564 |
|                 | 0           | 0           | 9.78E-19    | 0.00317449  | 0.001210823 | 0.00359919  |
|                 | 0.00761039  | 0           | 0.035868319 | 0           | 0.090356744 | 0.056086242 |
|                 | 0.029311742 | 0           | 8.54E-18    | 0           | 0.011106183 | 7.2E-18     |
|                 | 0.389559962 | 2.15E-19    | 0.00748934  | 0.127214435 | 1.33E-18    | 0.112779794 |
|                 | 7.64E-19    | 0.112779794 |             |             |             |             |
| TCGA-BR-4370-01 | 0.204313708 | 0           | 0.088733981 | 0.059319278 | 0           | 0.02400912  |
|                 | 0.022122522 | 0.001795377 | 0           | 0           | 0.006473761 | 0.021494923 |
|                 | 0.041676962 | 4.61E-19    | 0.121118524 | 0.050605121 | 0.036015197 | 0.000744418 |
|                 | 0           | 0.033985714 | 0.024928321 | 0.003111683 | 0.492798353 | 0           |
|                 | 0.103189436 | 0.087403289 | 0.001789005 | 0.16033565  | 0.370802489 | 0.090393157 |
|                 | 0.007960479 | 0.038369301 | 0.028076177 | 0.012094984 | 0.008153594 | 0.000559675 |
|                 | 0.001274458 | 1.64E-20    | 0.004283895 | 0.014736362 | 0.072762383 | 2.94E-19    |
|                 | 0           | 0.003042699 | 5.66E-18    | 0.001284348 | 0.001210502 | 0.024523824 |
|                 | 0.002335847 | 0           | 0           | 0.036108041 | 0.018241147 | 0.011118996 |
|                 | 0.001353007 | 0.0000913   | 6.21E-18    | 0.065146723 | 0.002626873 | 0.569573962 |
|                 | 0.001511358 | 5.98E-19    | 0.126747984 | 0.004498684 | 0.177234615 | 0.064058879 |
|                 | 0.241293494 |             |             |             |             |             |
| TCGA-BR-4371-01 | 0.111689429 | 0           | 0           | 0.027940188 | 0.07229217  | 0.027597153 |
|                 | 0.00602769  | 0           | 0.003382424 | 0           | 0.013343885 | 0.022726306 |
|                 | 0.028329491 | 0           | 0.080591953 | 5.11E-18    | 0.017699184 | 0.028637959 |
|                 | 1.19E-18    | 0.009954003 | 4.63E-18    | 0           | 0.485085407 | 0           |
|                 | 0           | 0           | 5.18E-19    | 0           | 0.022842049 | 0.107152842 |
|                 | 0.060997551 | 0           | 0.00527065  | 0.003981329 | 0.008995345 | 0.005422792 |
|                 | 0.000174829 | 4.01E-18    | 0           | 0.058810959 | 0           | 0.003021025 |
|                 | 0           | 2.07E-17    | 0           | 0.000774174 | 0.002057049 | 0.00147934  |
|                 | 0.003075457 | 5.38E-18    | 1.33E-17    | 0           | 0.014208918 | 0           |
|                 | 0.017680293 |             |             |             |             |             |

|                 |             |             |             |             |             |             |             |             |
|-----------------|-------------|-------------|-------------|-------------|-------------|-------------|-------------|-------------|
|                 | 0.013329883 | 0           | 0           | 0.033493422 | 8.08E-18    | 0.402850111 | 0.008005432 | 0.063579701 |
|                 | 0.146951399 | 0.000309737 | 0.051606947 | 2.31E-18    | 0.051606947 |             |             |             |
| TCGA-BR-6452-01 | 0.229689732 | 0.002018335 | 1.28E-18    | 0.051729194 | 0.007686465 |             |             |             |
|                 | 0.018974531 | 0.021200276 | 0.00633592  | 9.46E-19    | 0           | 0           | 0.006094201 | 0.064452226 |
|                 | 0.007287444 | 0.053427915 | 0.000638063 | 0.036896131 | 0.008600738 | 2.72E-19    |             |             |
|                 | 0.018503227 | 0.004139027 | 0.001997422 | 0.569776873 | 8.79E-20    | 0.053084336 | 0           |             |
|                 | 0.001485564 | 0.064937163 | 0.10565854  | 0.055860134 | 0.003841858 | 0.052687274 |             |             |
|                 | 0.040860547 | 0.019379187 | 0.004331123 | 0.000788894 | 0.001358946 | 0.01932426  |             |             |
|                 | 0.06717558  | 0.038204419 | 0.007288262 | 3.98E-18    | 0.060237221 | 0.004328398 |             |             |
|                 | 0.000406852 | 0.00187442  | 0           | 6.9E-21     | 0.019516355 | 0.027963185 | 0           | 0.069184369 |
|                 | 0.029186734 | 0.018462087 | 4.56E-20    | 4.12E-20    | 1.1E-19     | 0.027657112 | 1.88E-18    |             |
|                 | 0.354965967 | 0.006502014 | 0.116133563 | 0.143498419 | 0           | 0.112321985 | 0.029620849 |             |
|                 | 0.141942834 |             |             |             |             |             |             |             |
| TCGA-BR-6453-01 | 0.405888945 | 0.019796465 | 0.041721701 | 0.793370289 | 0.010498953 |             |             |             |
|                 | 0.014322728 | 0.102985463 | 2.63E-18    | 4.63E-19    | 2.81E-17    | 0.007135596 | 0.107847725 |             |
|                 | 0.163217304 | 1.22E-19    | 0.362926919 | 0.070068352 | 0.126667234 | 1.47E-21    | 0.010733232 |             |
|                 | 0.07865527  | 0.12084241  | 0.006215847 | 0.46806426  | 0           | 0.194360923 | 0           |             |
|                 | 0.012210333 | 0.420670218 | 0.762066891 | 0.047226718 | 0.083456359 | 0.056876197 |             |             |
|                 | 0.04698304  | 0.08224766  | 0.011692838 | 0.012486196 | 0.001750134 | 0.409465792 |             |             |
|                 | 0.119115425 | 0.046070099 | 0.009628455 | 2.18E-17    | 3.62E-19    | 0.090043287 | 6.09E-19    |             |
|                 | 0.159877488 | 0.003499802 | 5.7E-19     | 0           | 0.133974568 | 9.24E-18    | 0.078132993 |             |
|                 | 0.072307633 | 0.023907945 | 6.17E-18    | 2.78E-18    | 0.068901651 | 0.039609499 | 1.86E-21    |             |
|                 | 0.057644257 | 1.04E-17    | 0.103536181 | 0.054609681 | 0           | 0.709524414 | 0.167499899 |             |
|                 | 0.877024312 |             |             |             |             |             |             |             |
| TCGA-BR-6453-11 | 0.253507503 | 0.013911136 | 0           | 0.212209552 | 0.106944595 | 0.000207135 |             |             |
|                 | 0           | 0           | 0.003464226 | 1.66E-18    | 0           | 0.015678463 | 0.048197887 | 0.163177511 |
|                 | 0.03239285  | 0.070846976 | 0           | 0.002873122 | 0.015385445 | 0.017890402 | 0.004029007 |             |
|                 | 0.555592432 | 0           | 0.052729973 | 0           | 0.028455799 | 0.169780251 | 0.200909877 |             |
|                 | 0.053941191 | 0.011067589 | 0.001657475 | 0.009297951 | 0.021973551 | 0.004221284 |             |             |
|                 | 0.000339545 | 0           | 0.120866715 | 0.097535361 | 0.017904942 | 0.040617056 | 1.05E-17    | 0           |
|                 | 0.022285052 | 0.000245516 | 0           | 0.003943264 | 0.010034626 | 3.39E-19    | 0.070491859 |             |
|                 | 1.37E-18    | 0.099183174 | 7.45E-18    | 0.095007506 | 0           | 0.041067481 | 0           | 0.030904094 |
|                 | 0.297946859 | 0           | 0.064550858 | 0.01072349  | 7.32E-18    | 0.202555272 | 0.042265755 |             |
|                 | 0.244821028 |             |             |             |             |             |             |             |
| TCGA-BR-6454-01 | 0.255956286 | 0           | 0           | 0.196193617 | 0.112077378 | 2.18E-21    | 0.047575261 |             |
|                 | 9.82E-19    | 2.11E-18    | 2.64E-19    | 0.001235514 | 0.109574428 | 0.194901679 | 0.026191301 |             |
|                 | 0.012798394 | 0.018697843 | 0.085901267 | 0           | 2.2E-18     | 0.006845387 | 0.008756582 |             |
|                 | 2.06E-18    | 0.569971471 | 0           | 0.034412727 | 4.18E-18    | 0.009811799 | 0.048751511 |             |
|                 | 2.74E-19    | 0.045424451 | 0.007505638 | 0.007604429 | 0.015174551 | 0.033168394 |             |             |
|                 | 1.33E-19    | 0.001056116 | 0           | 0.087794388 | 0.059506249 | 0.028851169 | 3.1E-18     |             |
|                 | 9.92E-18    | 0           | 0.012178314 | 0           | 0           | 6.19E-20    | 0           | 0.009121897 |
|                 | 0.092855059 | 0.084269522 | 0.042170704 | 5.56E-19    | 0           | 0.003612083 | 0.04051704  |             |
|                 | 1.34E-18    | 0.264634991 | 0.015817097 | 0.110767645 | 0.088044813 | 0           | 0.213478574 |             |
|                 | 0.021584655 | 0.235063228 |             |             |             |             |             |             |

TCGA-BR-6454-11 0.335267639 0.007252664 0.01153942 0.428533884 0.051989142  
1.9E-20 0.035480044 0 0.02505995 8.37E-19 0 0.062349097 0.090457087 0  
0.079532279 0.027070438 0.158813935 1.65E-19 0 0.017281674 0.020401042  
0.015019094 0.644070827 0 0.190855517 2.29E-18 0.007543152 0.133745205  
0.063435358 0.063239717 0.015326291 0.009105392 0.01556248 0.009659373  
0.002635624 0.005076932 0.003336398 0.190183812 0.048031076 0.020883012  
0.015425298 4.09E-18 0 0.020892832 0 0.028944779 0.004277081 0.003430639  
3.88E-19 0.099528607 8.75E-20 0.086204023 0.088824787 0.108676586 3.53E-18  
0.004531892 0.014830113 0.042442148 0.000611472 0.261837893 3.97E-18  
0.057858369 0.019645733 1.3E-17 0.369187136 0.109254611 0.478441747

TCGA-BR-6455-01 0.232405836 0.007235085 0.047909711 0.068941238 0.075489364 0  
0.01273838 2.55E-18 3.74E-18 6.8E-18 0.000541457 0.062410501 0.10047415  
3.76E-19 0.099272318 0.029197994 0.026101113 0.01455828 0 0.016921717  
0.030221021 0.000109668 0.301887814 1.2E-19 0.087425853 0 0.003390824  
0.137791981 0.104294186 0.022630583 0.019159118 0.051661624 0.052524207  
0.020558826 0.006303805 0.004474083 0.00041004 0.026241031 0.109976116 0  
1.17E-18 0 0.090956167 0.028733332 0.007182537 0.001879629 0 0  
4.52E-18 0.060253451 0.023650531 0.02709169 0.087435132 0.039422351  
1.78E-18 1.69E-19 0.00236339 0.005708212 0 0.202627084 3.79E-18 0.199577649  
0.143168877 0 0.137565702 0.062440979 0.200006681

TCGA-BR-6456-01 0.247356519 0.004819678 0.125142379 0.013149243 0.010225227 0  
0.015540163 0 2.45E-19 0 0 0 0.00848772 1.94E-18 0.03077566  
0.103090185 0.027901742 1.61E-19 7.89E-20 0.011758927 0.073738544 0.034857676  
0.533768343 1.42E-19 0.205837133 0 0 0.164159407 0.045780408 0.044434732  
0.039264383 0.04122927 0.04070125 0.025589653 0 0.000944018 0.010641011  
3.34E-18 0.03966332 0.038107009 0.000527827 0 0.169007195 0.04220817 0  
0 0.007301766 0 0 0.061361067 0 0.002572168 0.228686822 0  
2.09E-19 1.45E-20 0 0.024594105 1.02E-19 0.180154877 0.00699039 0.060812836  
0.033156885 3.91E-19 0.067681962 0.142197678 0.20987964

TCGA-BR-6457-01 0.316857649 0.020573605 0.138050482 0.074425332 6.14E-18 0  
0.029154963 6.82E-18 1.77E-18 3.39E-18 2.06E-20 0.007784897 0.026704154  
1.15E-18 0.115949454 0.221406188 0.025783585 0 0 0.012834088 0.175482573  
0.006149198 0.447994891 0 0.526498613 0 0.003935564 0.420595216  
0.064221776 0.024888952 0.109858466 0.016655907 0.029368358 0.020305745  
1.55E-18 0.019001137 0.018093612 0.075363141 0.055264885 0.056167145  
9.11E-18 4.14E-19 0.019820525 0.097250632 0.01364288 0 0.008676869 0  
6.57E-18 0.164956014 8.7E-19 0.007296663 0.286371884 0.022900345 0  
0.059679664 4.75E-19 0.024700481 0.0019372 0.21577961 0 0.046797952 0  
0 0.078566282 0.361277396 0.439843677

TCGA-BR-6457-11 0.111127108 0.005318354 3.21E-18 0.160231318 0.039732483 0  
0.012154578 0 0.009785119 0.048184484 0.003144116 0.071243774 0.104089774  
9.45E-19 0.255064186 0.029419218 0.035732211 7.97E-20 0.002733889 0.012824344  
0.037592675 0.009335149 0.532413592 0 0.056638677 9.04E-19 0.035704603  
0.135149469 0.279617753 0.051872134 0.02152925 0.009745963 0.015787125

|                 |             |             |             |             |             |             |             |             |
|-----------------|-------------|-------------|-------------|-------------|-------------|-------------|-------------|-------------|
|                 | 0.031861192 | 0.004182314 | 0.003876423 | 2.16E-18    | 0.073599722 | 0.05912687  |             |             |
|                 | 0.017730898 | 0.010581932 | 0           | 0           | 0.028374585 | 0.001140111 | 6.23E-18    | 0.001347378 |
|                 | 0.003793455 | 1.82E-18    | 0.042288565 | 0.007935535 | 0.073497062 | 0.047431177 |             |             |
|                 | 0.156108489 | 6.18E-19    | 0.068030833 | 7.38E-18    | 0.033704584 | 7.36E-18    | 0.250540875 |             |
|                 | 2.83E-18    | 0.032627689 | 0.031319385 | 0           | 0.187958833 | 0.049774853 | 0.237733686 |             |
| TCGA-BR-6458-01 | 0.328533981 | 0.006041045 | 0.049294703 | 0.081811814 | 0.063856632 |             |             |             |
|                 | 0.00560435  | 0.045379488 | 0           | 0.001713655 | 0.005961375 | 0           | 0.053251093 |             |
|                 | 0.059764916 | 1.36E-18    | 0.063540216 | 0.072322436 | 0.013126392 | 4.31E-21    | 1.32E-18    |             |
|                 | 0.01279702  | 0.033075951 | 0.00114482  | 0.44788196  | 0           | 0.159551789 | 0           | 0           |
|                 | 0.087207718 | 5.59E-19    | 0.040721441 | 0.021779536 | 0.061356866 | 0.061766832 |             |             |
|                 | 0.039630576 | 0.005129273 | 0           | 0.000892783 | 0.014094342 | 0.047780528 | 0.013771827 |             |
|                 | 0.009232557 | 0           | 0.084597637 | 0.018744863 | 0.001568334 | 0.005554266 | 0.000377379 |             |
|                 | 3.22E-18    | 0           | 0.048033006 | 0           | 0.011918572 | 0.162416833 | 0.015513973 | 4.03E-19    |
|                 | 4.94E-19    | 0.005692028 | 0.013127139 | 0           | 0.316596439 | 0.021725008 | 0.074538501 |             |
|                 | 0.068974624 | 0.001543081 | 0.149815628 | 0.099334393 | 0.249150021 |             |             |             |
| TCGA-BR-6458-11 | 0.238745185 | 2.14E-20    | 5.04E-18    | 0.204462374 | 0.024871434 | 0.007956557 |             |             |
|                 | 0.038683174 | 6.65E-19    | 0.000982179 | 0.033906771 | 1.23E-19    | 0.065214323 | 0.104581244 |             |
|                 | 0           | 0.060319679 | 0           | 0.044693496 | 4.67E-20    | 0.008493727 | 0.012242982 | 0.013743759 |
|                 | 0.011221517 | 0.59302784  | 0           | 0           | 0.018179914 | 0.005432354 | 0.08081635  |             |
|                 | 0.048852623 | 0.051291531 | 0.014170381 | 0.010004486 | 0.010308753 | 0.01101977  |             |             |
|                 | 0.018705253 | 0.004762433 | 0.004311314 | 0.073099514 | 0.057348527 | 0           | 0.007785474 |             |
|                 | 1.1E-17     | 0.012878184 | 0.009530629 | 0.000154261 | 0           | 0.002054301 | 7.76E-22    |             |
|                 | 4.93E-18    | 0.028688438 | 0.01263435  | 0.026369108 | 1.35E-18    | 0.111602384 | 7.18E-19    |             |
|                 | 9.37E-19    | 2.72E-18    | 0.033559301 | 1.5E-18     | 0.332274938 | 0.002030396 | 0.031490704 |             |
|                 | 0.019260806 | 0.000202338 | 0.219757605 | 0.00687188  | 0.226629485 |             |             |             |
| TCGA-BR-6563-01 | 0.358614413 | 0.010080163 | 0.059714204 | 0.300651239 | 1.61E-19    |             |             |             |
|                 | 1.21E-20    | 0.050821755 | 9.71E-19    | 3.58E-19    | 0           | 0.014044129 | 0.170226251 | 0.183941579 |
|                 | 0.00071014  | 0.188994807 | 0.130008892 | 0.080023275 | 0.001018077 | 0.01099261  |             |             |
|                 | 0.023613967 | 0.09669637  | 0.000645391 | 0.433891505 | 0           | 0.327614359 | 0.007219207 |             |
|                 | 0.008964865 | 0.387376516 | 0.134703808 | 0.04053131  | 0.058563811 | 0.074001219 |             |             |
|                 | 0.061848348 | 0.048299782 | 0.009844353 | 0.010116008 | 0.006911806 | 0.160476731 |             |             |
|                 | 0.076597071 | 0.055737475 | 0.008066259 | 0           | 7.71E-18    | 0.054698023 | 3.6E-19     |             |
|                 | 0.029613522 | 0.004548461 | 3.18E-19    | 0           | 0.070601204 | 0           | 0.026751765 | 0.05134915  |
|                 | 0.039564949 | 1.48E-18    | 1.13E-18    | 3.6E-18     | 0.038002234 | 0.000228362 | 0.353640641 | 0           |
|                 | 0.043572291 | 0.015634662 | 2.17E-17    | 0.391365786 | 0.217195446 | 0.608561232 |             |             |
| TCGA-BR-6564-01 | 0.281439587 | 0           | 0.055716711 | 2.38E-19    | 4.75E-20    | 0           | 0.02446828  |             |
|                 | 8.33E-18    | 0.014926535 | 9.75E-19    | 0           | 0.014715096 | 0.013749944 | 5.11E-18    | 0.045759063 |
|                 | 0.199386771 | 0.028947275 | 2.27E-19    | 0.006682827 | 0.006476027 | 0.147653262 |             |             |
|                 | 0.004968196 | 0.371933438 | 0           | 0.435318908 | 5.49E-18    | 0.004256213 | 0.453402807 | 0           |
|                 | 0.018237175 | 0.107647238 | 0.0000194   | 0.029087417 | 0.006485997 | 0           | 0.01428618  |             |
|                 | 0.011251908 | 0           | 0.049928398 | 0.035504885 | 0           | 9.21E-19    | 0.253262777 | 0.085783416 |
|                 | 0.012803803 | 4.39E-18    | 0.011449556 | 0           | 7.1E-19     | 0.162932698 | 2.03E-17    | 2.19E-18    |
|                 | 0.249966092 | 0.006680073 | 2.42E-18    | 2E-17       | 0           | 0.013873197 | 0.001146189 |             |
|                 | 0.261256826 | 2.3E-18     | 0.031287717 | 0.036764374 | 1.11E-17    | 0.017452502 | 0.291486085 |             |

0.308938587

TCGA-BR-6564-11 0.263035971 0.024033074 0.03278102 0.15385737 0.079755765 0  
0.016976992 6.54E-19 0.016343531 0 2.13E-21 0.023812033 0.067022201 0  
0.137868642 0.06007925 0.07975 1.05E-18 0.010484974 0.010644905 0.0685954  
0.011724671 0.503060884 0 0.17495241 0 0.035679907 0.273526253  
0.062886352 0.039279057 0.040439607 0.004585458 0.019695481 0.023629085  
0.003808689 0.003909122 1.07E-20 0.083454397 0.050403855 0.041906863 0  
2.64E-19 0 0.048407657 4.43E-19 3E-18 0.003871556 0.007826505 7.19E-18  
0.081600369 0 0.125289786 0.097406322 0.076141157 0 0.042537225  
2.38E-18 0.02178945 0 0.198403131 2.24E-19 0.026786902 0.027095755 0  
0.144173088 0.133790442 0.27796353

TCGA-BR-6565-01 0.258931358 0.003358895 0.107105561 0.108832717 0.053398707  
0.006701286 1.88E-20 1.57E-18 0 3.87E-18 0.001424034 0.031095707 0.028937306  
0.006937713 0.019656707 0.018756177 0.025294914 0 3.32E-18 0.01869242  
0.010821832 0.000867358 0.516569853 0 0.095854525 0 0.003197508  
0.031307875 0.132179933 0.046994051 0.006176187 0.057132086 0.056838592  
0.034262492 0.001072135 0 0.00191215 0.030465492 0.08256899 0.034025748  
0.006901822 2.9E-18 0.016159692 0.012115835 1.16E-19 0.003329953 0.000252245  
0 0 0.080225818 0 0.037933469 0.152571988 0.020417207 1.62E-18 0  
0.005257752 0.022224206 0 0.255676926 1.22E-18 0.178511086 0.115230978 0  
0.149729496 0.055017626 0.204747122

TCGA-BR-6566-01 0.232634434 0.007474993 0.089770792 0.057514661 0.12299449 0  
1.79E-19 1.45E-18 5.88E-19 6.02E-19 0.00200544 0 0.064868414 0 0.03770029  
0 0.047292907 2.01E-20 0 0.012297293 0 2.44E-18 0.607996059 0  
0.071464666 0 0.001180308 0.047700083 0.061296514 0.070981591 0.004472126  
0.089180269 0.087337584 0.03989918 0.000385906 0 0 0.016966539  
0.096586789 0.019198876 0.006511096 1.3E-17 0.313374244 0.009427293  
7.59E-19 0 0 0 5.46E-19 0.088376934 0 0.043107518 0.106848697  
0.038379248 0 1.44E-17 0.00244162 0.06720485 0 0.05270185 9.69E-18  
0.231748453 0.116616518 1.26E-18 0.110592817 0.03946983 0.150062646

TCGA-BR-6705-01 0.272357135 0.254188959 0.169870776 0 0 5.04E-18 0.025276026  
5.37E-18 0.000143542 2.69E-18 9.31E-19 1.93E-18 1.14E-19 0 0.056978844  
0.224333115 0.008827753 6.34E-20 0 0.005368774 0.319992115 0.004882911  
0.370759121 0 0.417323176 0 0.001244273 0.454776517 0.019483342  
0.026867719 0.210537643 2.23E-18 0 0.020314276 0 0.012498535 0.014597787  
0 0.068219359 0.046469048 7.91E-18 5.31E-19 0.043692352 0.1828767  
0.0000910 0.003264103 2.8E-18 1.2E-17 0.154075478 1.61E-19 0 0.323361288  
0 1.5E-18 0.083130837 8.23E-18 0.012886486 0.002527718 0.10464038 0  
0.079831483 7.56E-18 0 0.006834456 0.495752125 0.502586582

TCGA-BR-6706-01 0.445997757 0.012013393 0.073245522 0.120707836 0.101022769 0  
0.074109308 6.63E-18 0 2.59E-18 0.009119895 0.21940893 0.232451041  
0.073973283 0.064350659 0.117071974 0.05744287 0 0 0.021628583  
0.09781121 0.00208268 0.419089895 0 0.312504903 0 0.001338625  
0.217621224 0.062051891 0.029852669 0.056629643 0.053730722 0.058540576

0.018430464 0 0.003034802 0.006857341 0.014566309 0.066662296 0.035750811  
 2.49E-18 1.18E-18 0.04496519 0.061525533 1.35E-18 6.64E-19 0.000761737 0  
 9.56E-18 0.14731189 0 0.083441967 0.231307175 0.062782109 0 1.8E-17 0  
 0.010409241 0 0.17501463 2.14E-19 0.178787687 0.067207758 0 0.278372501  
 0.211164753 0.489537254  
 TCGA-BR-6707-01 0.30944985 0.004903406 0.018694043 0.091882945 0.159113918  
 4.24E-22 0.029532315 3.34E-19 3.46E-18 0 0.025521932 0.130830255 0.183698775  
 0.034473126 0.041813611 0.009188303 0.031412417 0 9.39E-19 0.015799543  
 0.035493498 0 0.4101378 0 0.027748613 3.51E-19 0.002483805 0.100156327  
 0.090219304 0.022806864 0.024835563 0.074063384 0.059327188 0.028002622  
 0.000704302 0 0.001817639 0.03738285 0.132271314 0 0 0.153265555  
 0.037621581 7.74E-19 1.31E-18 0.000671149 1.53E-18 1.94E-18 0.067631943 0  
 0.070478446 0.115589908 0.027779916 0 2.59E-19 0.016064008 0.009798533 0  
 0.075724321 8.57E-18 0.292147461 0.174447301 1.32E-17 0.208853619 0.034072758  
 0.242926378  
 TCGA-BR-6709-01 0.389158334 0 0.0930314 0.213091972 0.1284365 0.008799881  
 0.084068212 9.26E-19 0 7.67E-18 0.014512689 0.174425143 0.211480776  
 0.028438478 0.117169225 0.069818829 0.070900081 1.31E-19 0 0.051005665  
 0.039257943 1.17E-18 0.058762626 8.3E-19 0.151970399 0 0.001924465  
 0.051570754 0.419589284 0.000818944 0.013417561 0.136483697 0.117116165  
 0.031653765 0.003150288 0 0.004716185 0.0477251 0.042428331 0.033853978  
 0.063006076 6.01E-18 0.162138376 0.028170667 6.12E-19 0.011005857 0.00086633  
 0 6.87E-18 0.075205118 1.76E-18 0.062021795 0.101918418 0.030685022  
 1.53E-18 0 0.019989165 0.000799031 0 0.24401885 5.77E-19 0.122209759  
 0.239313742 3.59E-18 0.427441895 0.095614171 0.523056066  
 TCGA-BR-6710-01 0.073589255 7.32E-20 6.86E-18 0.031759456 0.014060895 0  
 1.26E-19 1.94E-18 0.017565605 0.005256336 0 0.016223191 0.024738692  
 8.47E-19 0.006233574 0.003026494 0.012779691 1.35E-19 0.002967098 5.37E-20  
 0.044028515 0.00213035 0.590910173 3.02E-19 0.091650303 0 0.009748793  
 0.143353389 0 0.048415708 0.025031792 6.56E-19 0.00488118 0.004282836  
 0.005474999 0.005137916 5.23E-19 0 0.043957156 0.003506519 9.49E-18  
 5.18E-18 0 0.022308333 0.008489159 1.38E-19 0.005304045 0.002916907 0  
 0.026291319 0.037621263 0.007468824 0.042459798 0.058808046 0 3.46E-18  
 5.5E-18 0.028897838 4.02E-18 0.3618595 0 0.022465657 0 0 0.039003269  
 0.067839409 0.106842678  
 TCGA-BR-6801-01 0.015468366 0.00452042 0.070267856 0 0.010335403 4.37E-19  
 2.84E-19 0 0.003999718 4.32E-18 6E-20 0 0 5.12E-18 0.042521934  
 0.069806892 0.008592562 0.003236327 0 0.001399018 0.031126515 0.004799112  
 0.620920806 7.09E-20 0.113206938 1.04E-18 0.001373355 0.12965294 0.332172203  
 0.095415111 0.018247466 0.013159875 0.02481933 0.000977583 3.02E-20  
 0.001249379 0.001732694 0 0.059264665 0.045666688 2.47E-18 0 0.016998767  
 0.02212697 0.001473957 0 0.001528255 0 0 0.089989424 1.21E-18 0  
 0.140782674 0.010881387 1.91E-18 0 1.7E-17 0.075257829 0 0.339356694 0  
 0.072234316 0.009366969 1.54E-18 0.012905337 0.074426937 0.087332274

TCGA-BR-6802-01 0.322349625 0.002384883 0.028805933 0.119862798 0.110039229  
0.001497969 0.019912132 1.53E-18 0 0 0.00437895 0.037832155 0.104699243  
0.023808934 0.0259142 0.005692917 0.064540447 0 0 0.011893318  
0.032595156 6.15E-19 0.673193861 0 2.23E-19 0 0.000545482 0.035918745 0  
0.150801188 0.01991771 0.030765393 0.041786583 0.01470176 0.000581843  
0.002073741 0.003064854 0.024005214 0.054053105 0.058452623 0 3.41E-18  
0.059693872 0.022158656 2.23E-19 0.00148067 0 0 1.41E-19 0.061672914 0  
0.065794091 0.094406606 0.034611394 8.39E-19 0 0.009953637 0.049831247  
7.89E-19 0.1845276 5.87E-20 0.165404117 0.18261759 0 0.133957004  
0.017490019 0.151447024

TCGA-BR-6802-11 0.17851119 0.015423835 5.92E-18 3.01E-19 0.021435932 0.008110486  
1.2E-17 2.63E-18 2.31E-17 0 0.033426594 0.09731614 0.143698321 0.000480933  
0.286370328 7.51E-21 0 0.026670173 0.02456134 0.02265862 0.021935347 0  
0.518455611 0.001466548 0.102191687 0 3.97E-19 0.375188839 0.324500711  
0.04904951 0.016062582 0.013021913 0.006536681 0.012876534 3.13E-20  
0.00181641 0.011637134 0 0.169655854 9.22E-18 0.018031399 1.46E-17  
0.017249754 0.018716065 0.005318603 7.51E-18 0.018929756 0.001373844 0  
0.031707331 0 0.092656049 0 0.086078573 5.85E-18 0 8.93E-18 0.03712455  
0 0.418500901 9.81E-19 0.039480541 0.168371571 1.43E-17 0.101601277  
0.069775435 0.171376712

TCGA-BR-6803-01 0.29324725 0.017086902 0.071115176 0.076383067 0 1.6E-19  
0.04021687 2.35E-18 1.56E-18 0 0 0.043643164 0.068019586 1.56E-18  
0.054770874 0.172710235 0.046140422 0 0 0.010851586 0.146820701  
1.26E-20 0.457870642 0 0.409862882 0 0.002340218 0.445176895 0.009479  
0.03185706 0.096262097 0.007536117 0.01700139 0.02142617 7E-19  
0.019411904 0 0.040392482 0.053737659 0.031131635 5.39E-18 1.36E-17  
5.57E-18 0.0816596 0.009929932 5.13E-18 0.009070235 0 0 0.078709885 0  
0 0.208912249 0.007657455 1.54E-18 2.23E-18 1.59E-18 0.020795377 1.93E-19  
0.331226528 5.7E-18 0.055984866 0.074334316 7.28E-19 0.092275956 0.286885243  
0.379161199

TCGA-BR-6852-01 0.403866551 0.005233939 0.056848761 0.140582872 0.17953726  
0.001817995 0.042976086 1.24E-18 0 3.22E-18 0.006752503 0.149187116  
0.214487307 0.101223865 0.114237086 0.0343215 0.032025448 1.08E-19  
8.64E-18 0.039607983 0.028075871 0 0.613664627 1.23E-18 0.058581215 0 0  
0.012148157 0.310318379 0.097839919 0.014102913 0.078776213 0.08553336  
0.031967736 0.003912848 0 0.004094989 0.03437435 0.043602623 0.040752289  
0.025795437 3.12E-19 0.140918389 0.025834241 0 0.002882344 0 3.17E-19  
1.99E-19 0.042485828 0 0.123831266 0.124026513 0.037681511 1.39E-18  
2.68E-19 0.016653584 0.056393901 1.26E-19 0.081918413 0.009518609 0.279888738  
0.154112759 0 0.291908313 0.045945512 0.337853825

TCGA-BR-6852-11 0.153106883 0 0 0.281853343 0.10975593 0.011515241  
0.026869256 6.78E-19 0 0.01606392 8.14E-21 0.062045858 0.126159411 0  
0.183197105 5.37E-19 0.086603126 3.04E-19 4.49E-19 0.03179174 0.025261364  
0.004343133 0.618674709 0 0.017237307 0 0.006490293 0.069391825

|                 |             |             |             |             |             |             |             |
|-----------------|-------------|-------------|-------------|-------------|-------------|-------------|-------------|
|                 | 0.464046359 | 0.057252592 | 0.017760617 | 0.020091502 | 0.021616556 | 0.011614744 |             |
|                 | 0.007595412 | 0.001088575 | 0.00455643  | 0.09010376  | 0.092139569 | 2.27E-18    |             |
|                 | 0.053206345 | 5.72E-19    | 0           | 0.026286152 | 0.001255548 | 8.27E-19    | 0.00031685  |
|                 | 0.003746711 | 0           | 0.035127318 | 0.018347918 | 0.061357417 | 0.009374691 | 0.180095072 |
|                 | 1.08E-18    | 0.001035644 | 0.008399563 | 0.046292414 | 2.53E-19    | 0.256831036 | 0.008525658 |
|                 | 0.098808493 | 0.102209423 | 0.002053852 | 0.309782695 | 0.021249336 | 0.331032031 |             |
| TCGA-BR-7196-01 | 0.38509734  | 0.006744916 | 0.070670637 | 0.080162061 | 0.070141082 | 0           |             |
|                 | 0.040937338 | 0           | 4.77E-19    | 2.73E-18    | 0.00105293  | 0.057135236 | 0.072283121 |
|                 | 7.61E-20    | 0.101859601 | 0.176923903 | 0.008064346 | 7.63E-19    | 1.68E-18    | 0.015956243 |
|                 | 0.149418069 | 0           | 0.39982511  | 1.9E-19     | 0.322462806 | 0           | 0.004263193 |
|                 | 0.060862633 | 0.018402771 | 0.092180021 | 0.032439801 | 0.03125778  | 0.020730654 | 0           |
|                 | 0.020607563 | 0.011575269 | 0.021980649 | 0.075772055 | 0.036580682 | 0.014391639 |             |
|                 | 7E-19       | 0.047372477 | 0.085891142 | 0.014075828 | 0.007934583 | 0.000954745 | 0           |
|                 | 1.22E-18    | 0.08428287  | 7.98E-18    | 0.012410001 | 0.173574677 | 0.027455806 | 5.25E-18    |
|                 | 0.040685115 | 1.36E-17    | 0.005549085 | 0.001701965 | 0.246571505 | 0           | 0.082452378 |
|                 | 0.062756105 | 1.47E-18    | 0.133389987 | 0.239312895 | 0.372702882 |             |             |
| TCGA-BR-7197-01 | 4.37E-19    | 0.002786619 | 0.03427867  | 1.11E-18    | 0.038025707 | 0           |             |
|                 | 0.009937711 | 1.96E-18    | 2.97E-21    | 4.73E-18    | 2.06E-18    | 0.004181444 | 5.82E-18    |
|                 | 0.022185316 | 0.049726832 | 0.005815855 | 0.009751766 | 0           | 5.64E-20    | 0.012980322 |
|                 | 0.525054938 | 0           | 0.16482917  | 0           | 0.003948893 | 0.108587488 | 0.086344997 |
|                 | 0.037298932 | 0.011600787 | 0.001520388 | 0.008425748 | 0.005368555 | 0.00064708  | 0           |
|                 | 0.004896387 | 0           | 0.059252315 | 0.045226896 | 1.39E-17    | 0           | 0.015366629 |
|                 | 3.12E-18    | 1.11E-19    | 0.003109673 | 3.34E-19    | 0           | 0.11924966  | 0           |
|                 | 0           | 0           | 0           | 0.010555921 | 0           | 0.227327441 | 0           |
|                 | 5.39E-18    | 0.004232608 | 0.090298055 | 0.094530664 |             |             |             |
| TCGA-BR-7703-01 | 0.12026107  | 0           | 0           | 0.040985967 | 0.041101372 | 0           | 0           |
|                 | 0.016751627 | 0.028183879 | 0.005405156 | 0.015387869 | 0.033166635 | 0           | 0.013180045 |
|                 | 2.46E-21    | 0.040284074 | 0           | 2.48E-18    | 0.002656772 | 3.13E-19    | 0           |
|                 | 0.007794816 | 2.62E-19    | 0.002405182 | 0.04505385  | 1.86E-18    | 0.059607903 | 0.004641084 |
|                 | 0.014192416 | 0.01787566  | 0.00978347  | 0.002630724 | 0.001067828 | 0.001400894 |             |
|                 | 0.014826836 | 0.125040527 | 0.021344647 | 9.16E-18    | 0           | 0.04578573  | 0.011283438 |
|                 | 3.54E-19    | 1.68E-18    | 0.000627766 | 1.19E-18    | 1.59E-18    | 0.113434753 | 9.67E-18    |
|                 | 0.043256131 | 0.025240964 | 6.87E-19    | 0           | 2.78E-19    | 0.029342997 | 0           |
|                 | 9.53E-18    | 0.247915107 | 0.049812563 | 0           | 0.050569165 | 0.003897408 | 0.054466573 |
| TCGA-BR-7703-11 | 0.147063959 | 0.00011496  | 1.33E-18    | 0.181350411 | 0.023540299 |             |             |
|                 | 0.002378222 | 0.032165572 | 0           | 0           | 0.013627162 | 1.33E-19    | 0.0622002   |
|                 | 0           | 0.033864687 | 0.001149417 | 0.051821696 | 8.61E-20    | 0.00174867  | 0.006340373 |
|                 | 0.042489183 | 0.010020076 | 0.602872568 | 6.06E-21    | 0.017959165 | 2.13E-19    | 0.006440705 |
|                 | 0.094299652 | 0.072502043 | 0.046976674 | 0.030198169 | 0.013804859 | 0.019871419 |             |
|                 | 0.010408825 | 0.018954871 | 0.003353233 | 0           | 0.045938443 | 0.067527918 | 6.59E-22    |
|                 | 0.011477771 | 2.42E-18    | 2.7E-18     | 0.032089959 | 0           | 0           | 0.000695973 |
|                 | 0.031880032 | 0.022139905 | 0.018944988 | 0.012443678 | 0.132588688 | 1.96E-19    | 0           |
|                 | 0.033665908 | 1.5E-18     | 0.298396338 | 0.00679298  | 0.069871205 | 0.024983501 |             |
|                 | 8.83E-19    | 0.205786366 | 0.030281654 | 0.23606802  |             |             |             |

TCGA-BR-7704-01 0.286673446 4.84E-20 0 0.134029068 0.194178579 1.59E-20  
0.081656369 2.82E-18 0.012718002 0.010463453 0.010061861 0.086994186  
0.141024622 0.024332758 0.152458027 1.2E-19 0.07895058 8.98E-19 0  
0.026258062 0.01157272 0 0.459466783 0 0 0 0 0.06568587  
0.188155449 0.026708096 0.018352909 0.038298804 0.05501251 0 0 0  
0.011992175 0.034986631 0.077284877 0 0 1.18E-17 0.468137592 0.025176445  
0 0 0.01080544 3.54E-19 0 0.142483092 1.37E-17 0.075011838 0.039737003  
0.036549035 9.03E-19 5.14E-19 0.030952733 0.022410435 0 3.83E-18 0  
0.312791866 0.039174971 3.91E-18 0.190386747 0.00578636 0.196173107  
TCGA-BR-7704-11 0.164235397 0.052141493 0.07107729 3.65E-19 0.033321379  
1.98E-19 0.004931582 6.2E-19 0.011465742 1.36E-18 0 0.016014297 0.004507548  
4.51E-19 0.036130255 0.102806414 0.005192283 0 0.013654818 9.84E-21  
0.053920806 0.015556338 0.384842505 6.89E-20 0.423556777 0 0.014959516  
0.48191961 0.002505498 0.022117424 0.042010867 1.53E-18 0.000179693  
0.010621025 1.39E-20 0.005895718 0.002977736 0 0.043915168 0.032684646 0  
8.32E-19 0 0.046835029 0.021628576 0 0.016939846 0.002061922 5.61E-20  
0.110906825 0 0 0.149647104 0.016686317 1.08E-17 0.143176872 1.41E-17  
0.010589696 0.003093291 0.319664086 0 0 2.28E-18 0 0.022421705  
0.264809538 0.287231242  
TCGA-BR-7707-01 0.200374813 0.002465617 0.012213666 0.004188743 0.169829207  
0.0000644 8E-19 0 4.14E-19 6.22E-19 0.004036373 1.24E-18 0.030959581  
6.16E-19 0.038500161 5.71E-20 0.010781963 0.008428655 1.21E-17 0.012230986  
0.018379222 1.12E-18 0.692946545 9.82E-20 0.007716107 7.14E-19 0.001028609  
0.002190408 0.155710747 0.140980515 0.018528628 0.01595998 0.030623195 0  
0.000873852 0 0.000440941 0.006970524 0.110361496 0.040731411 0 0  
0.244988618 0.028676539 0 0.000492282 0.0000137 0 0 0.028111535  
8.3E-18 0.041324726 0.06309234 0.0123881 4.86E-19 0 0.016909561  
0.073079618 1.18E-19 0.135832472 0 0.304052174 0.202167218 6.98E-18  
0.02216904 0.014280473 0.036449514  
TCGA-BR-7715-01 0.050864338 0.004503814 0.059313169 0 0.040105827 1.03E-19 0  
1.79E-18 0 1.04E-17 0 0 2.89E-19 1.53E-17 0.054313652 0.068003927  
1.34E-18 0.004390243 0 2.15E-19 0.046288287 0 0.338995486 0 0.150387924  
7.31E-18 0.003997967 0.175366815 0.195959516 0.020544424 0.027671548  
0.009326556 0.021293163 0.009672864 1.76E-19 1.74E-20 0.012898888 0  
0.100383542 0.022470041 5.38E-18 0 0.137629648 0.026105911 0 1.47E-18  
0.006977167 0.001002064 2.16E-17 0.096852427 0.015470248 3.55E-19 0.212371274  
9.8E-20 0 0 0 0.008950815 9.17E-19 0.298598529 1.79E-17 0.111177271  
0.187722198 0 0.006885747 0.100590013 0.107475759  
TCGA-BR-7715-11 0.420436367 0.001560337 1.42E-18 0.976964977 0.021313135  
0.098394319 0.151310851 5.95E-20 0.03080593 5.3E-18 0.017915448 0.227088643  
0.263470392 0.049289042 0.34186484 0.014107416 0.291539374 0.006920089  
0.009916967 0.068137718 0.028805362 0.000208778 0.369413501 0 0.15121964  
0.02506509 0.008621209 0.225201463 0.737671715 0.024100321 0.018787867  
0.034651116 0.054225064 0.005953103 0.030196234 0.002770841 0.000461998

|                 |             |             |             |             |             |             |             |
|-----------------|-------------|-------------|-------------|-------------|-------------|-------------|-------------|
| 0.42647527      | 0.102590517 | 0.007758371 | 0.07822514  | 0           | 1.72E-18    | 0.038023499 | 0           |
| 0.092986387     | 0.001830813 | 0.02476147  | 0           | 0.087747863 | 0           | 0.131888608 |             |
| 0.000564222     | 0.143535637 | 1.44E-18    | 9.47E-19    | 0.095672763 | 0.029335189 | 0           |             |
| 0.279126314     | 0           | 0.088855011 | 0.078684931 | 0           | 0.96015605  | 0.090792669 |             |
| 1.05094872      |             |             |             |             |             |             |             |
| TCGA-BR-7716-01 | 0.344213343 | 0.00402791  | 0.052625734 | 0.110646711 | 0.065836774 | 0           |             |
| 0.002860204     | 0           | 0           | 0.006286757 | 0.077000411 | 0.126828993 | 0.000614887 |             |
| 0.025344387     | 0.028504087 | 0.035130445 | 1.11E-19    | 0           | 0.019705915 | 0.005632934 |             |
| 0.007940347     | 0.568052624 | 1.12E-19    | 0.00476819  | 1E-18       | 0.015337889 | 0.070679615 |             |
| 0.061299911     | 0.04729408  | 0.00319797  | 0.066797994 | 0.068745515 | 0.045413556 | 0           |             |
| 0.000527012     | 0.009671894 | 0.036081891 | 0.058036479 | 0.024762663 | 0           | 0           |             |
| 0.112239211     | 0.00931046  | 0           | 0.010492208 | 0.000111051 | 7.99E-20    | 4.26E-18    |             |
| 0.047713966     | 0           | 0.076120542 | 0.071824656 | 0.036992629 | 2.96E-18    | 2.24E-19    |             |
| 0.00388272      | 0.038622302 | 3.99E-19    | 0.213094813 | 4.24E-20    | 0.132026346 | 0.088306716 |             |
| 0.023947242     | 0.188060918 | 0.007214517 | 0.195275435 |             |             |             |             |
| TCGA-BR-7716-11 | 0.136257753 | 0.004833799 | 2.93E-18    | 0.092220707 | 0.047165119 |             |             |
| 1.92E-19        | 0.003265192 | 2.63E-18    | 0           | 0.016728519 | 2.98E-21    | 0.056022707 | 0.081074784 |
| 0               | 0.07079179  | 0.02930175  | 0.037174175 | 0.000126417 | 0.007783768 | 0.012471074 |             |
| 0.030004479     | 0.006899728 | 0.619363671 | 0           | 0.181270577 | 0           | 0.007102296 |             |
| 0.155126784     | 0.166905175 | 0.053930646 | 0.022075034 | 0.006526078 | 0.006623364 |             |             |
| 0.012029471     | 0.007054172 | 0.002825222 | 0           | 0.019253074 | 0.068005463 | 0           |             |
| 0.025550108     | 0           | 0           | 0.03235051  | 0           | 3.37E-18    | 0.005802527 | 0.006317645 |
| 0.045062725     | 0           | 0.033531596 | 0.049535584 | 0.069698661 | 0           | 0           | 5.35E-18    |
| 0.0403366       | 4.47E-18    | 0.369052679 | 3.33E-19    | 0.06659783  | 0.03852204  | 0           |             |
| 0.142041479     | 0.108054427 | 0.250095907 |             |             |             |             |             |
| TCGA-BR-7717-01 | 0.137872211 | 0           | 0.067602374 | 0.055951356 | 0.07040361  | 0           | 0           |
| 0               | 0           | 0.004392651 | 2.02E-19    | 0           | 4.61E-18    | 0.006872618 | 0.072315772 |
| 0.00052266      | 0           | 4.43E-19    | 0.040860261 | 0           | 0.611657959 | 0           | 0.061950187 |
| 0.007749007     | 0.133830603 | 3.24E-18    | 0.064416829 | 0.030058133 | 0.005313874 |             |             |
| 0.018810455     | 0.00578567  | 5.11E-21    | 0.000991732 | 0.004597131 | 0.052345412 |             |             |
| 0.10975268      | 0.041553563 | 1.9E-18     | 8.33E-18    | 0.144994555 | 0.029019118 | 1.02E-18    |             |
| 1.14E-18        | 0.001353605 | 4.43E-19    | 0           | 0.068528757 | 0           | 0.002929761 | 0.100301064 |
| 0.012280474     | 0           | 3.22E-18    | 0.046536664 | 0.048717951 | 0.002207151 | 0.214697099 |             |
| 1.87E-18        | 0.171633931 | 0.093954655 | 0           | 0.040843487 | 0.051405224 | 0.092248711 |             |
| TCGA-BR-7717-11 | 0.283842501 | 0.009321109 | 4.88E-18    | 0.878804948 | 0.11324856  |             |             |
| 0.052299712     | 0.058697261 | 4.71E-18    | 0           | 2.09E-17    | 0.003526516 | 0.15416274  |             |
| 0.224931099     | 0.008898604 | 0.335415801 | 0.017014725 | 0.210034762 | 0.006357775 |             |             |
| 0.003728332     | 0.047141558 | 0.025511769 | 1.97E-18    | 0.448570458 | 8.56E-21    | 0.186133782 |             |
| 0               | 0.009053975 | 0.249267948 | 0.713816654 | 0.030575136 | 0.022049921 | 0.00682697  |             |
| 0.023853583     | 0.006470864 | 0.011418155 | 0           | 0.001948607 | 0.388760445 | 0.097422337 |             |
| 0.002833049     | 0.097431511 | 0           | 1.47E-17    | 0.03625988  | 0.001669187 | 0.103347585 |             |
| 0.005732775     | 0.01011449  | 0           | 0.06669141  | 3.81E-17    | 0.144855974 | 0.009854114 |             |
| 0.14045978      | 1.46E-19    | 0           | 0.096760509 | 0.032805425 | 0           | 0.330696423 | 0           |
| 0.070223791     | 0.152907459 | 0           | 0.803933581 | 0.11048333  | 0.914416911 |             |             |

TCGA-BR-7722-01 0.144786696 0.004508933 0.023866638 0.043305901 1.38E-18  
4.62E-19 0.015272694 5.24E-19 0.037639761 0.029885979 0.012733633 0.021617337  
0.011367463 4.51E-18 0.061885528 0.039149974 0.041026045 4.35E-20 0.013320695  
0.007349112 0.033024927 0.010080601 0.653656488 0 0.039767349 1.9E-19  
0.003363434 0.13789514 0.042949276 0.051382776 0.029559215 0.030232853  
0.015705852 0.028266839 0.010436723 0.005135999 0.000865979 0.005650259  
0.080334962 0.041068172 5E-18 0 0 0.025589541 0.000461047 0  
0.001850784 0 8.32E-18 0.072522359 0 0.017140676 0.070820446 0.004012772  
0 0 0 0.01438971 0 0.223511557 3.4E-18 0.061739732 3.51E-18  
2.87E-18 0.082015018 0.038650604 0.120665622

TCGA-BR-7723-01 0.266422116 0.032325485 0.064084075 0.115697812 0.134682548 0  
0.037501939 3.16E-19 0 1.66E-18 0.018498029 0.058498296 0.034694908  
5.76E-18 0.052842677 0.030621797 0.021439793 0 0 0.017660562 0.023193813  
1.33E-18 0.146490576 0 0.088859683 0 0.009048163 0.026853967 0.1784019  
0.002793533 0.013252031 0.019895698 0.02173304 0.007298442 0.012406296  
7.11E-20 0.010947489 0.027472697 0.068938214 0.016869093 0.01200583 0  
0.034806137 0.013083916 0.00872402 0.01112565 0.007216528 0 0  
0.002954088 0.036173942 0.018721774 0.174131287 0.052930472 0 0  
0.022490024 0.000141921 4.66E-21 0.309542852 0.009808415 0.100793676  
0.087770756 0 0.157442997 0.07218949 0.229632487

TCGA-BR-7851-01 0.203408919 0.006651053 0.059908571 0.086080362 0.060829337  
0.012121961 0 2.05E-19 0 2.56E-18 0.004789664 1.08E-19 0.034337543  
0.000463807 0.033477962 0.043600132 0.025190508 0.009948818 0 0.01068549  
0.020511164 3.6E-20 0.58187392 0 0.12843038 0 0.000515047 0.029793929  
0.155464088 0.06530487 0.009970593 0.027425 0.030166188 0.020415973  
0.006187986 0.002911608 0.000529888 0.04205349 0.055219496 0.003485521  
0.008511968 4.58E-18 0.010651692 0.019408075 0.006592966 0.004392627  
0.000448746 1.72E-20 0 0.037058398 0.001978983 0.034673404 0.085459082  
0.019330581 0 1.97E-19 0.011503655 0.032308698 2.19E-18 0.245421167  
3.41E-18 0.154347695 0.127252025 0 0.092593871 0.077796298 0.170390169

TCGA-BR-7851-11 0.135145241 0.016464663 0 0.088889639 0.049900865 0  
5.67E-19 5.22E-20 0.002883614 1.56E-17 0.000750255 0 0.030553253 1.43E-18  
0.066931837 0.031105678 0.03480932 0 0.006564889 0.010467727 0.006437646  
0.006612489 0.540235054 0.000392798 0 0 0.034410547 0.106171476  
0.180921961 0.057772709 0.008447866 0.001303429 0.011017304 0.021561853  
0.002650679 0.003799302 3.2E-19 0.051723402 0.03367126 0.008915506  
0.001624353 8.76E-18 0 0.007503741 0 0.000327924 0.001383151 0.007082475  
1.88E-18 0.071742912 3.52E-18 0.06984452 1.29E-17 0.05482352 4.12E-19  
0.028320433 0 0.026299539 5.16E-18 0.2056563 6.45E-19 0.024236688  
0.037132853 9.53E-18 0.079087195 0.011451154 0.090538349

TCGA-BR-7901-01 0.260456013 0.007208574 0.097171797 1.86E-18 0.039240386 0 0  
4.97E-19 0 0 0 2.57E-18 0.002743218 3.92E-18 0.048716659 0.073449634 0  
0.002703188 0 0.015148811 0.066875445 0.000103393 0.585976054 6.58E-19  
0.138059019 0 0.004554779 0.171307088 0.106915218 0.044009948 0.037885108

|                 |                 |             |             |             |             |             |
|-----------------|-----------------|-------------|-------------|-------------|-------------|-------------|
| 0.035275769     | 0.034820297     | 0.0133412   | 1.83E-18    | 0.011183605 | 0.010157138 | 0           |
| 0.01824002      | 0.053234636     | 0.013958786 | 0           | 0.027682605 | 0.030713903 | 0           |
| 9.69E-19        | 0.001775341     | 0.00111594  | 3.61E-18    | 0.041600871 | 0           | 0.014805121 |
| 0.182715704     | 0.003575645     | 1.26E-18    | 0           | 4.9E-18     | 0.038322185 | 3.85E-19    |
| 0.303092613     | 3.11E-18        | 0.05667772  | 0.036309521 | 3.21E-18    | 0.043735132 | 0.106071519 |
| 0.149806652     | TCGA-BR-7957-01 | 0.162411263 | 0.007121629 | 0.07710817  | 7.53E-19    | 3.72E-18    |
| 3.11E-19        | 5.36E-20        | 7.71E-18    | 3.37E-18    | 0           | 0           | 1.03E-18    |
| 0.000898489     | 0               | 0.079098849 | 0.173653332 | 0           | 0.003387469 | 0.003494818 |
| 0.001214335     | 0.165272076     | 1.3E-18     | 0.378682681 | 0           | 0.377737895 | 0.010282375 |
| 0.002178979     | 0.329329706     | 0.033226582 | 0.04492155  | 0.094141418 | 0.001621298 | 0.007804394 |
| 0.008850185     | 0.005839309     | 0.00998084  | 0.006004744 | 1.9E-17     | 0.061920747 | 0.025230536 |
| 0               | 3.35E-19        | 0.001345853 | 0.09964658  | 0.008308865 | 2.65E-18    | 0.004080147 |
| 2.26E-22        | 1.65E-17        | 0.031760497 | 0           | 0           | 0.178358199 | 0           |
| 3.11E-18        | 0.117015203     | 5.62E-18    | 0.010183459 | 0.003368879 | 0.420889234 | 1.02E-17    |
| 0.081890621     | 0.029953737     | 0           | 0.005783295 | 0.2750658   | 0.280849095 |             |
| TCGA-BR-7958-01 | 0.435004014     | 0.004387182 | 0.068453782 | 0.140957669 | 0.156158103 |             |
| 0.016617666     | 0.041466133     | 1.14E-18    | 4.06E-18    | 0           | 0.015809648 | 0.16060809  |
| 0.197004889     | 0.053108963     | 0.142885328 | 0.032205296 | 0.071597558 | 0.003406709 | 0           |
| 0.052410621     | 0.024911993     | 0           | 0.482487986 | 1.66E-18    | 0.076759273 | 0           |
| 0               | 0.033169876     | 0.197218496 | 0.036150802 | 0.007053174 | 0.073071851 | 0.053646338 |
| 0.019723517     | 0.006237558     | 0           | 0.005687697 | 0.032786132 | 0.080109822 | 0.041419799 |
| 0.008065258     | 1.76E-18        | 0.05768029  | 0.023981526 | 1.22E-19    | 0.0000767   | 0.0000872   |
| 0               | 7.52E-18        | 0.103891217 | 1.48E-18    | 0.13201104  | 0.135548697 | 0.013990298 |
| 1.9E-18         | 3.21E-19        | 0.000204566 | 0.02092178  | 0           | 0.172777792 | 0.004755237 |
| 0.198383662     | 0.203951767     | 8.7E-20     | 0.294234032 | 0.053029224 | 0.347263256 |             |
| TCGA-BR-7959-01 | 0.153952924     | 2.78E-19    | 0.103028662 | 7.87E-20    | 0.023180864 | 0           |
| 0               | 1.42E-18        | 0           | 2.84E-18    | 0           | 0           | 0           |
| 0.067286341     | 0.141823421     | 3.13E-19    | 0.004182139 | 0.000548014 | 0.002273477 | 0.074781911 |
| 0.008808706     | 0.457785119     | 0           | 0.273056295 | 7.1E-20     | 0.002958969 | 0.168161082 |
| 0.09678307      | 0.034542246     | 0.031177418 | 0.017081138 | 0.025015205 | 0.007615687 | 6.37E-21    |
| 0.005460076     | 0.007429101     | 0           | 0.06753771  | 0.061491795 | 0.018653305 | 0           |
| 0               | 0.033706818     | 0.008257619 | 0           | 0.005348037 | 0.00327704  | 0           |
| 0.031102352     | 2.12E-18        | 0           | 0.222543847 | 0           | 4.66E-18    | 2.4E-17     |
| 0               | 0.036556259     | 1.18E-18    | 0.29803728  | 0           | 0.050415895 |             |
| 0.015682524     | 1.33E-19        | 0.033395778 | 0.173919103 | 0.207314881 |             |             |
| TCGA-BR-8058-01 | 0.386007564     | 0.007155469 | 0.030785521 | 0.275611385 | 0.020432136 |             |
| 0.027573294     | 0.067006517     | 0.002687817 | 0           | 1.79E-18    | 0           | 0.077441938 |
| 0.135961236     | 1.23E-21        | 0.123029263 | 0.099357509 | 0.098506626 | 0.003211775 | 0           |
| 0.024225842     | 0.042577352     | 0.022994924 | 0.498162005 | 0           | 0.120201251 | 0.004431792 |
| 0.0029871       | 0.154943547     | 0.02065036  | 0.031937924 | 0.016100012 | 0.059464047 | 0.046002194 |
| 0.052130511     | 0.007027862     | 0.004997781 | 0.007079309 | 0.106044626 | 0.046302011 |             |
| 0.026101231     | 0.02060688      | 8.46E-20    | 0.092385986 | 0.018185293 | 0           | 0.018721669 |
| 0.001439189     | 0.001612227     | 2.44E-18    | 0.048080125 | 0           | 0.097181852 | 0.13008384  |
| 0.01687854      | 0               | 0           | 0           | 0.01651241  | 2.15E-19    | 0.280657005 |
| 0.015537903     | 0.041987874     | 0.071903569 | 0           | 0.327781948 | 0.084967036 | 0.412748984 |

TCGA-BR-8059-01 0.114445966 7.36E-20 0.077001119 1.44E-18 3.87E-19 0 0  
9.28E-19 5.35E-18 0 0.001794097 0.000239729 2.3E-18 6.62E-19 0.009832782  
0.049495905 2.42E-20 0.017877331 0 0.00200837 0.056567317 0 0.614621907  
2.96E-19 0.13844422 1.44E-19 0.000623849 0.119324417 0.055389792 0.05532498  
0.024885276 0.011730691 0.010712144 0.004015096 2.94E-19 0.001381293  
0.000425463 0 0.04048786 0.036850373 1.35E-19 9.33E-19 0.179058783  
0.031058069 0.002764282 4.61E-19 0.001221938 1.23E-20 0 0.075121741 0  
0.003404375 0.122391945 0.004063225 0 4.88E-18 2.88E-18 0.040068556 0  
0.466808411 0 0.121280391 0.029567888 4.5E-18 0.009319193 0.097505768  
0.106824961

TCGA-BR-8060-01 0.230425919 0 0.076204122 0.054689424 0.128040988 0.009644163  
1.04E-17 2.33E-18 4.74E-18 0 0.003032329 9.53E-19 9.38E-19 1.37E-17 0.10455697  
0.033309591 0.044098873 0.003134286 0 0.021284073 0.065147054 1.65E-18  
0.053837403 0 0.172623571 4.06E-18 0.006525343 0.127862865 0.267436415 0  
0.02242318 0.040904202 0.039083422 0.007158412 0.005218692 4.91E-20  
0.00246742 0.00379489 0.047592173 0.040132296 0.01541361 3.57E-18 0  
0.032125171 0.002850874 7.31E-19 0.059400661 0.000332707 0 0 0  
0.020109154 0.072665926 0.02948978 1.91E-18 0.037988956 0.02863861  
0.001452489 0 0.43056174 0.012414605 0.114044177 0.096252471 2.23E-18  
0.091895139 0.118885313 0.210780452

TCGA-BR-8060-11 0.116448471 0.013998891 1.88E-18 0.03548483 0.067712069 0  
6.16E-19 6.26E-18 7.52E-22 6.63E-18 0.005131061 0.019150817 0.01489015  
1.43E-18 0.035119484 0.073761481 0.023411884 0.003867235 0.007895773 0  
0.049122741 0.000142222 0.353352885 1.31E-19 0.347688517 0 0.011755932  
0.450865308 0 0.017584902 0.030684772 1.97E-18 1.36E-19 0 0.001114395  
0.00518752 0 3.97E-19 0.038973503 0.021562231 0.004004165 1.36E-17 0  
0.027390366 0.023273359 0 0.016352874 0.0106362 9.48E-18 0.073697661  
4.4E-18 0 0.044892065 0.017956154 0 0.077521019 0 0.015724034  
3.74E-19 0.492275233 8.16E-18 0.006426127 5.31E-18 0 0.047021752 0.205405074  
0.252426826

TCGA-BR-8077-01 0.255670693 2.23E-19 0 0.010657706 0.100786276 1.48E-19  
1.21E-20 5.7E-19 0 5.06E-21 0.026657351 0.080668514 0.057449948 0  
0.080458546 0.004756801 0.005667709 0.011258 0 0.028538337 0.053537749  
1.95E-18 0.448751396 0.003136711 0.026642049 0.004048504 0.012564615  
0.118839139 0.125316684 0.027893881 0.030139772 0.037009873 0.049021426  
0.007074741 0.001724163 0.002380659 8.2E-20 6.3E-19 0.099452394 0.061667594  
0.021545777 3.73E-18 0 0.037120206 7.25E-19 2.83E-19 0.001697245 0.005544837  
1.49E-18 0.113874585 5.54E-18 0.088863311 0.031901602 0.01717311 1.04E-18  
5.47E-19 9.45E-18 0.029371265 2.57E-18 0.259796181 7.19E-18 0.158404838  
0.090149403 0.010911337 0.123792804 0.040089899 0.163882704

TCGA-BR-8078-01 0.170666055 0.005895467 0.014864175 0.064697739 0.120418793  
0.024412653 2.67E-19 9.15E-20 5.08E-19 2.15E-18 0.004559496 0.041095882  
0.113034171 0.000569678 0.07686338 0.013299116 0.031383073 0.012742228  
2.49E-19 0.015156652 0.002798484 1.24E-18 0.528250478 0 0.088481497 0 0

|                 |                 |                     |               |               |                           |
|-----------------|-----------------|---------------------|---------------|---------------|---------------------------|
| 0.027738287     | 0.227752146     | 0.07114164          | 0.002194371   | 0.06912812    | 0.048093055               |
| 0.026150458     | 0.004807009     | 3.7E-20             | 0.002022976   | 0.007035843   | 0.057424564               |
| 0.018659236     | 0.030366209     | 7.11E-19            | 0.029326003   | 0.002769951   | 0.00080534                |
| 0.001926407     | 0.000124235     | 0.001752345         | 0.004120217   | 0.012236765   | 0 0.07817684              |
| 0.054167424     | 0.008220111     | 0.000713044         | 2.42E-19      | 0.009442308   | 0.033285243 0             |
| 0.302514578     | 0.00877614      | 0.109099319         | 0.20227432    | 3.21E-18      | 0.154082782               |
| 0.048587724     | 0.202670506     |                     |               |               |                           |
| TCGA-BR-8080-01 | 0.20837063      | 7.45E-21            | 0.057029738   | 0.169027224   | 0.010629361               |
| 7.68E-20        | 0.006884149     | 1.6E-19             | 0 1.18E-17    | 4.64E-20      | 0.016857125 0.031103308 0 |
| 0.109668664     | 0.174548521     | 0.048918378         | 0.003534512   | 2.39E-20      | 0.015437667               |
| 0.154699273     | 0.018288545     | 0.445994679         | 0 0.317656698 | 0.00051299    | 0.005679925               |
| 0.281185293     | 0.35897352      | 0.046572821         | 0.096203646   | 0.020453096   | 0.024127953               |
| 0.019082473     | 0.001155941     | 0.008300291         | 0.000716665   | 0.054465187   | 0.042854816               |
| 0.04140908      | 0.027022717     | 0 2.17E-18          | 0.081827604   | 0 0.003329286 | 0.001751733               |
| 2.43E-20        | 0 0.028431277   | 0 0 0.168495395     | 0.015345431   | 3.24E-18      | 0.071183177               |
| 0 0.035965319   | 0 0.310067759   | 2.36E-18            | 0.036310145   | 0.058395927   | 0                         |
| 0.17882821      | 0.236177985     | 0.415006195         |               |               |                           |
| TCGA-BR-8081-01 | 0.441591111     | 0.019740698         | 0.032950893   | 0.239241075   | 0.158578326               |
| 0.020614246     | 0.023557023     | 0 0 7.42E-19        | 0.00660017    | 0.020955481   | 0.072587903               |
| 0 0.090162084   | 0.038883261     | 0.067753065         | 0.007028504   | 7.11E-19      | 0.032047656               |
| 0.033290741     | 6.48E-18        | 0.462142528         | 1.71E-19      | 0.166590128   | 1.06E-18 0.003665887      |
| 0.054159069     | 0.146684274     | 0.049869216         | 0.013563745   | 0.112823827   | 0.111209811               |
| 0.031609119     | 0.010629081     | 0 0.004188647       | 0.073594458   | 0.064990003   | 0.008426858               |
| 0.016141132     | 0 0.071634775   | 0.027702196         | 0 0.027954751 | 0.000130816   |                           |
| 2.63E-19        | 0 0.075343267   | 0 0.073443469       | 0.054928593   | 0.036828194   | 0 0                       |
| 0.018771199     | 0.039762402     | 2.09E-20            | 0.249289667   | 1.56E-18      | 0.152898907 0.139443376   |
| 0.006213694     | 0.287892168     | 0.109810784         | 0.397702952   |               |                           |
| TCGA-BR-8284-01 | 0.314768193     | 0.001316024         | 0.069107165   | 0.070858538   | 0.062461956               |
| 0.019213029     | 0.030594906     | 4.86E-20            | 4.51E-18      | 1E-19         | 0.007694196 0.11972075    |
| 0.19190303      | 0.013861485     | 0.049305435         | 0.098004365   | 0.036369547   | 0.01463341                |
| 1.32E-18        | 0.019689236     | 0.068354946         | 0.002319938   | 0.426433081   | 0 0.126836965             |
| 2.73E-18        | 0.004893183     | 0.202346022         | 0.052151705   | 0.027750378   | 0.034331686               |
| 0.057088489     | 0.049393929     | 0.038906713         | 0 0.003244224 | 0.003756409   | 0.00888661                |
| 0.067555618     | 0.014571331     | 0 3.49E-19          | 5.19E-18      | 0.040113661   | 0 0 0.001034815           |
| 3.92E-20        | 0 0.046790388   | 0 0.034124335       | 0.12069663    | 0.009852754   | 0                         |
| 4.05E-18        | 2.57E-18        | 0.021336576         | 0 0.263449676 | 0.014532697   | 0.10418458                |
| 0.143626003     | 5.15E-18        | 0.179784634         | 0.098253968   | 0.278038601   |                           |
| TCGA-BR-8286-01 | 0.181328034     | 0 0 0 0 0.006708181 | 2.07E-19      | 6.64E-20      |                           |
| 4.08E-18        | 3.25E-18        | 0.006043113         | 0.006478134   | 0.017255101   | 0 0.167237006             |
| 0.006839284     | 0.011398588     | 0.01693115          | 0.007449043   | 0.0326913     | 0.058123606               |
| 0.000693082     | 0.570815264     | 0.000630421         | 0.012304275   | 0.014649863   | 0.001282748               |
| 0.223220051     | 0.325000017     | 0.07609849          | 0.027776586   | 0.009785565   | 0.010739668               |
| 0.016197087     | 0.005164388     | 0.006974211         | 0 0.001194349 | 0.083293071   | 0.042047714               |
| 0.013374955     | 0 0 0.024135492 | 3.85E-21            | 0 0.000807762 | 0.003433999   | 0                         |

|                 |             |             |             |             |             |             |             |             |
|-----------------|-------------|-------------|-------------|-------------|-------------|-------------|-------------|-------------|
|                 | 0.008621288 | 1.53E-17    | 0.033485429 | 0.060873117 | 0.005813196 | 2.56E-20    | 0           | 0           |
|                 | 0.037555574 | 0           | 0.419560162 | 2.64E-18    | 0.086181478 | 0.218418715 | 0           | 0.047747616 |
|                 | 0.03521394  | 0.082961556 |             |             |             |             |             |             |
| TCGA-BR-8289-01 | 0.097817832 | 0.003909171 | 0.066369533 | 0.00838022  | 1.07E-18    |             |             |             |
|                 | 0.0000257   | 4.78E-19    | 0           | 0           | 0           | 0.011234585 | 0           | 0           |
|                 | 0.121944297 | 1.65E-21    | 0.021384099 | 0.002255315 | 1.38E-18    | 0.009813822 | 4.71E-19    |             |
|                 | 0.483367402 | 0           | 0.192449936 | 0           | 0           | 0.116968002 | 0           | 0.041322633 |
|                 | 0.01255314  | 0.024362566 | 0.01131943  | 0.013780819 | 0.000156055 | 7.96E-20    |             |             |
|                 | 0.00071312  | 0.11181715  | 0.007927128 | 1.6E-18     | 0           | 1.6E-18     | 0.014627761 |             |
|                 | 0.004441313 | 0.000855924 | 0.00136727  | 0           | 8.06E-19    | 0.058124853 | 0.061159153 | 0           |
|                 | 0.098392014 | 0.007454123 | 0           | 8.95E-20    | 0.010952858 | 0.027433243 | 3.85E-18    |             |
|                 | 0.362667759 | 8.61E-18    | 0.129629381 | 0.100174679 | 0           | 0.023142786 | 0.103086465 |             |
|                 | 0.126229251 |             |             |             |             |             |             |             |
| TCGA-BR-8291-01 | 0.242344944 | 0.000971187 | 0.024929678 | 0.003220681 | 0.011118724 | 0           |             |             |
|                 | 0.015676519 | 0           | 0.000908113 | 1.02E-19    | 0           | 0.034549425 | 0.054228072 | 0           |
|                 | 0.316987477 | 0.109589372 | 0.007763863 | 0.000438545 | 0.002338818 | 0.054236566 |             |             |
|                 | 0.140060466 | 0.030534662 | 0.480593697 | 5.05E-20    | 0.356741122 | 0.013650669 |             |             |
|                 | 0.008030686 | 0.407339615 | 0.4979761   | 0.027896084 | 0.07286782  | 0.047365555 |             |             |
|                 | 0.024367652 | 0.072128738 | 0.000812492 | 0.009953122 | 2.2E-18     | 1.48E-18    | 0.021227498 |             |
|                 | 0.045905825 | 0.041178889 | 0           | 0           | 0.063489367 | 0           | 1.72E-18    | 0.002143299 |
|                 | 5.58E-18    | 0.002531419 | 3.62E-18    | 0           | 0.085275604 | 0.005008235 | 9.12E-20    | 0.05943074  |
|                 | 0           | 0.015608538 | 0           | 0.385133042 | 0           | 0.010976199 | 0.01149878  | 2.89E-20    |
|                 | 0.141265514 | 0.248886387 | 0.390151902 |             |             |             |             |             |
| TCGA-BR-8295-01 | 0.008522835 | 0.005925267 | 0.020329003 | 0.042088749 | 0.147561658 |             |             |             |
|                 | 1.98E-19    | 8.62E-18    | 0           | 5.77E-19    | 5.64E-18    | 1.04E-18    | 0           | 0           |
|                 | 0.004660397 | 3.9E-18     | 3.81E-18    | 0.033825613 | 0           | 0.308575387 | 1.2E-18     | 1.53E-17    |
|                 | 2.4E-17     | 0.015634087 | 0.103182666 | 1.34E-18    | 0.016823904 | 0.01991114  | 0           |             |
|                 | 0.002305765 | 0           | 0.01378894  | 0           | 0.000945122 | 0.009858935 | 0.137609226 |             |
|                 | 0.009114571 | 0           | 1.6E-17     | 0           | 0.023438232 | 0.009942281 | 0.025657694 | 0.003362756 |
|                 | 1.25E-18    | 1.13E-17    | 0.099193905 | 0.069702826 | 2.24E-19    | 0.106121733 | 0.011585783 | 0           |
|                 | 3.17E-18    | 0.01238148  | 0.006061357 | 0           | 0.219603918 | 0           | 0.22888571  | 0.063288888 |
|                 | 0           | 0.037251792 | 0.01987544  | 0.057127232 |             |             |             |             |
| TCGA-BR-8296-01 | 0.32631699  | 0.0000474   | 0.007587468 | 0.488990598 | 0.050583167 |             |             |             |
|                 | 0.025408642 | 0.081843988 | 1.45E-20    | 0.027842099 | 0           | 0.001798581 | 0.024422875 |             |
|                 | 0.058565285 | 0           | 0.037359831 | 0.010487827 | 0.147530818 | 0.000569261 | 0.000138463 |             |
|                 | 0.012058111 | 0.05675081  | 0.008015913 | 0.606241404 | 0           | 0.06294656  | 0           |             |
|                 | 0.002231691 | 0.140975381 | 1.34E-18    | 0.046953247 | 0.039276537 | 0.007277472 |             |             |
|                 | 0.017575302 | 0.015526065 | 0.014290529 | 0.013117162 | 0.005307174 | 0.209348505 |             |             |
|                 | 0.046704825 | 0.007524891 | 3.32E-19    | 4.52E-18    | 0.028930379 | 0.032941556 | 0           |             |
|                 | 0.063913698 | 0.00134206  | 0           | 2.14E-18    | 0.063967907 | 0           | 0.027074336 | 0.106898314 |
|                 | 0.011534728 | 1.38E-20    | 2.41E-17    | 0.037164558 | 0.035829433 | 1.31E-19    | 0.171167113 |             |
|                 | 3.31E-19    | 0.068519793 | 0.024841929 | 1.88E-19    | 0.370036999 | 0.05987239  | 0.429909389 |             |
| TCGA-BR-8297-01 | 0.142739175 | 0           | 0.018831466 | 0.052463427 | 3.26E-18    | 4.5E-20     | 0           |             |
|                 | 9.71E-19    | 0           | 0           | 0.00357064  | 1.45E-20    | 0.004508521 | 3.73E-18    | 0.014938002 |

|                 |             |             |             |             |             |             |
|-----------------|-------------|-------------|-------------|-------------|-------------|-------------|
| 0.142446174     | 0.019167402 | 0.007956256 | 0.000385981 | 0           | 0.036235802 | 0           |
| 0.391102393     | 0           | 0.371903481 | 0           | 0.001066    | 0.284029318 | 2.11E-18    |
| 0.026853109     | 0           | 0.003930833 | 0.000191207 | 7.84E-19    | 0.010121271 | 0           |
| 0.048935489     | 0.024662748 | 0           | 0           | 1.37E-18    | 0.017514394 | 0.035177675 |
| 0.007398444     | 0           | 0           | 0.058018251 | 0           | 7.01E-18    | 0.072370981 |
| 4.71E-19        | 0           | 2.05E-18    | 0.015565662 | 0           | 0.545983826 | 0           |
| 6.74E-18        | 0.034975618 | 0.204069641 | 0.23904526  |             |             |             |
| TCGA-BR-8361-01 | 0.214802575 | 3.51E-19    | 4.37E-18    | 0.067466028 | 0.177094447 | 0.028555607 |
| 0               | 3.45E-19    | 0           | 4.88E-18    | 0.005971355 | 0.075459741 | 0.11079376  |
| 0.016293974     | 0.015270233 | 0.047162944 | 0.014784745 | 0           | 0.004185782 | 0.009981459 |
| 2.85E-18        | 0.430832333 | 2.8E-18     | 0.073133769 | 0           | 0.002371854 | 0.025144736 |
| 3.92E-18        | 0.062011208 | 0.007712416 | 0.008702809 | 0.022976656 | 0.00890163  |             |
| 0.007681383     | 1.24E-19    | 1.03E-19    | 0.023364482 | 0.083062095 | 0.014838726 | 0           |
| 1.05E-17        | 0.011554932 | 0.010319314 | 0           | 0.000314995 | 3.91E-20    | 1.83E-17    |
| 0.033786081     | 0.026875864 | 0.087457641 | 0.014296187 | 3.73E-20    | 0           | 0.010860416 |
| 0.026512637     | 0           | 0.229722856 | 0.00320333  | 0.143530149 | 0.15883209  | 0.000497907 |
| 0.108997162     | 0.041557614 | 0.150554776 |             |             |             |             |
| TCGA-BR-8362-01 | 0.272854722 | 0           | 0.011283837 | 0.008558646 | 0.008470344 | 0.008005557 |
| 0.002086689     | 5.92E-20    | 0.000444026 | 0.015217981 | 0           | 0.009177633 | 0.047376804 |
| 4.28E-19        | 0.041858804 | 0.070191712 | 0.00390594  | 3.52E-21    | 0.002849616 | 0.015459636 |
| 0.032912956     | 0.01593546  | 0.547612611 | 0.000190566 | 0.179420966 | 0.011665693 |             |
| 0.005215743     | 0.203024899 | 0.05840597  | 0.064162255 | 0.022711782 | 0.042267042 |             |
| 0.052782537     | 0.032679799 | 0.005370512 | 0.002380503 | 0           | 0           | 0.029406355 |
| 0.053415306     | 0.008317567 | 6.01E-19    | 0           | 0.012291905 | 2.44E-19    | 0           |
| 0.007055707     | 9.13E-19    | 0.032206596 | 3.7E-19     | 0.000183375 | 0.092203616 | 0.002864717 |
| 5.18E-19        | 3.17E-18    | 0           | 0.031919062 | 0           | 0.332598428 | 0.001522024 |
| 0.091529055     | 0.0022785   | 0.074761469 | 0.106166961 | 0.18092843  |             |             |
| TCGA-BR-8363-01 | 0.260661994 | 0.00034742  | 0.007520103 | 0.197234884 | 0.213537308 |             |
| 0.049547432     | 0.04130788  | 3.04E-20    | 0           | 1.73E-18    | 0.011943507 | 0.116683209 |
| 0.204284533     | 0.015301399 | 0.160977866 | 0.021691364 | 0.071570258 | 0.009989482 | 0           |
| 0.037279919     | 0.042909516 | 4.71E-18    | 0.341593962 | 5.32E-19    | 0.121003507 | 0           |
| 0.002712168     | 0.028286802 | 0.485239955 | 0.027363366 | 0.02098733  | 0.041042194 |             |
| 0.04518184      | 0.012843229 | 0.004508423 | 0           | 0.003650785 | 0.020990427 | 0.073937752 |
| 0.041766686     | 0.006953828 | 0           | 0.000592742 | 0.036040667 | 0.004279287 | 0           |
| 0               | 0.018739011 | 0           | 0.098950838 | 0.036856048 | 0.060418243 | 9.21E-19    |
| 0.027021552     | 0.021007687 | 0.001211281 | 0.336553389 | 0.009279025 | 0.125183001 |             |
| 0.356211599     | 0           | 0.26913497  | 0.082130221 | 0.351265191 |             |             |
| TCGA-BR-8364-01 | 0.219248915 | 0           | 0.074504791 | 0.069632085 | 1.03E-17    | 2.57E-19    |
| 0.012922888     | 3.72E-20    | 0.01329839  | 0           | 0           | 0.025433414 | 0.032689155 |
| 0.19022778      | 0.169316795 | 0.044843102 | 0           | 0.007673381 | 0.022019293 | 0.064957242 |
| 0.014629447     | 0.417269946 | 0           | 0.488959705 | 0.006328244 | 0.002642518 | 0.32867858  |
| 0.297412966     | 0.029380453 | 0.036561677 | 0.019893772 | 0.022910077 | 0.018255322 |             |
| 0.005171389     | 0.00987674  | 5.2E-18     | 0.013422928 | 0.004344658 | 0.056781179 |             |
| 0.007193072     | 6.35E-19    | 0           | 0.027073485 | 0.012901481 | 0.003452844 | 0.007817233 |

2.5E-19 4.72E-18 0.016613411 1.58E-18 0.009395172 0.178878954 0.004487505  
 1.89E-19 0.019339678 8.13E-18 0.016340322 0 0.428482936 5.85E-19 0.00331805  
 0.001916466 0 0.109314982 0.276958473 0.386273455  
 TCGA-BR-8365-01 0.24214146 0.002427732 0.056448537 0.025724478 0 1.19E-18  
 0.016587213 1.22E-18 0.006091869 1.89E-19 0 0.042490952 0.029131604  
 3.91E-19 0.041504234 0.163653842 0.033367443 0.001741059 0.006604463  
 0.006621724 0.121481255 0 0.211203071 3.06E-21 0.443346747 0.00794121  
 0.004380837 0.461890342 3.24E-18 0.009687859 0.070776944 0 0.010087272  
 0.010058213 0 0.019007967 0.001502032 0 0.01781714 0.055692228 0  
 1.53E-19 0 0.048468826 0.020994511 7.78E-18 0.017073943 1.48E-20 7.41E-18  
 0.068924394 8.85E-19 0 0.170060583 0.006668121 7.54E-19 0.02515688  
 1.24E-17 0.0000829 0.000813348 0.483158894 0 3.23E-19 0.026621791 0  
 0.049891436 0.283627866 0.333519302  
 TCGA-BR-8366-01 0.459828885 0.013833537 0.049879604 0.256596424 0.066264133  
 0.017891931 0.086921658 0 0 1.67E-19 0.011266412 0.129671418 0.215174454  
 0.043557602 0.170743775 0.058169795 0.073081947 0.002356219 0 0.039120559  
 0.03303476 0.011748254 0.6583094 1.08E-19 0.129347681 3.59E-18 0  
 0.095874613 0.230358857 0.106652771 0.019337473 0.116762299 0.116593777  
 0.02194123 0.007215553 0.002165869 0.001029249 0.080776685 0.019917169  
 0.029991 0.028231239 3.24E-19 0.006523893 0.026400733 3.77E-18 0.016761046  
 0.000208545 1.27E-18 1.54E-18 0.072403309 0 0.107648066 0.065322635  
 0.03927263 0 5.22E-19 0.00379658 0.045859659 0 0.321627713 2.74E-18  
 0.144024936 0.109878675 0 0.392897164 0.088107989 0.481005153  
 TCGA-BR-8367-01 0.12622417 1.02E-18 0.016482539 3.35E-21 0 0.000543945  
 0.004348332 3.68E-19 0.006904049 0 1.41E-20 0.011295936 0.013804243  
 3.12E-18 0.090213236 0.107418004 0.016120502 7.29E-19 0.001264356 0.009992099  
 0.058055337 0.00503309 0.50128533 0 0.20910904 0.020092373 0.008451128  
 0.176557703 0.115471744 0.042292256 0.037519659 0.00819004 0.013313631  
 0.025665682 0.00807658 0.008507934 0 0 0.030910131 0.042461914  
 0.000553238 7.86E-19 0 0.021490602 0.007276795 4.35E-20 0.006637625 0  
 1.47E-18 2.93E-18 5.68E-18 4.86E-19 0.116279539 0 9.63E-20 0.09309513  
 3.55E-18 0.019840982 2.28E-18 0.388316537 2.09E-18 0.017301756 0.039505332 0  
 0.028760654 0.133582188 0.162342843  
 TCGA-BR-8368-01 0.102426949 6.39E-19 5.23E-18 0.034702688 0.090465757 0.02146405  
 0.002329527 0.004026789 0 0 0.003603385 0.003784962 0.039224499 0  
 0.015917383 0 0.036227689 0.011800412 3.57E-19 4.69E-23 0.011913007  
 5.69E-19 0.495505535 0 0 0 0.00157191 0.036722901 0.005298185  
 0.049293926 0.007918639 0.002593636 0.010436253 0.016066169 0.004101263 0  
 0 0.011107501 0.101734052 0.011534207 1.24E-17 0 3.21E-17 0.014329962  
 1.43E-20 0 0.000504516 6.59E-19 1.54E-19 0.051110645 0.026417393 0.017186675  
 0.020231049 0.015555656 4.95E-19 0 0.013465253 0.030872876 5.64E-18  
 0.256014347 0.009043401 0.123784137 0.244744612 0 0.032806225 0.005956504  
 0.038762728  
 TCGA-BR-8369-01 0.060869904 0.055566247 1.02E-17 0.084440486 0.004361147 0

2.22E-19 0 0.009561855 8.46E-18 0 0 0 0 0.012265004 0.063081816  
 0.037630803 0.007725283 7.97E-19 0 0.043156159 0.002647058 0.550612179  
 3.1E-19 0.23343837 1.28E-18 0.006656586 0.163932842 0.015656023 0.060035584  
 0.033463127 0 0.002020784 0.011618899 0.013606232 0.006469507 0  
 0.030111053 0.035010805 0.029455888 0 1.26E-17 0 0.016596442 0  
 0.007830553 0.004100545 0.003451861 4.45E-18 0.020735622 6.04E-18 0  
 0.056396005 0.006140043 0 0.032600668 1.49E-19 0.029891384 7.42E-19  
 0.387495761 0 0.020443598 0.118968766 0 0.069430425 0.166080388  
 0.235510813  
 TCGA-BR-8371-01 0.228177093 0.006261582 0.064675127 0.409952932 0 0  
 0.046235641 0 0.024870042 3.01E-17 0.006578678 0.047364065 0 2.75E-19  
 0.035125715 0.126963351 0.104027985 0.01157252 0 0.003146355 0.040672303  
 0 0.192196181 6.26E-19 0.381035619 9.31E-18 0.003856704 0.393484358 0  
 0.013407143 0.038661923 0 0.00000429 0.0045244 0 0.014551141  
 0.003655758 0.179627643 0.025708336 0.027019494 0 1.02E-17 0 0.024700491  
 0.026918575 0.065277834 0.016728428 1.22E-18 0 0.176451201 1.6E-18 0  
 0.080555403 0.001823721 5.48E-18 0.032539568 5.89E-18 0.003295857 0.006223708  
 0.496883831 0 0.007036927 0 8.49E-18 0.306975568 0.213984752 0.52096032  
 TCGA-BR-8372-01 0.288566664 5.64E-20 0 0.086616075 0.186510829 0.054206625 0  
 2.68E-18 2.18E-17 0 0.010429544 0.043107284 0.11881868 8.1E-18 0.140386047  
 3.74E-18 0.027833679 0.034894184 0 0.0304278 0 0 0.330706186 0  
 0.003416814 0 4.72E-19 0.019473127 0.097715843 0.030031468 0.002786306  
 0.079217697 0.05268894 0.032104466 0 8.99E-20 0 0.019581541 0.09690794  
 0 0.005855367 0 4.4E-17 0.004942693 0.006982645 0.003284773 0.000567223  
 0 1.98E-18 0.014005311 0.038317158 0.069618144 0 0.011468104 2.58E-18 0  
 0.014281019 0.026318207 1.37E-17 0.43573994 0.017848278 0.154464997  
 0.297966668 8.05E-19 0.163482815 0.001708407 0.165191222  
 TCGA-BR-8373-01 0.094802292 0 0.128731839 1.56E-19 0.035460934 0 0.003138188  
 2.08E-18 0 0 0 7.68E-20 0 0 0.041728583 0.108603872 0.002774558 0  
 0 0.001420352 0.012320788 0.010390496 0.513147379 0 0.087662718  
 2.97E-18 0.009623164 0.116624269 0 0.048876683 0.008949129 0 0.013341704  
 0.009509648 0.012338553 0.004486533 2.58E-18 0 3.55E-18 0.085089435 0  
 3.07E-19 0 0 0 0.004297637 0.00842661 2.08E-18 0.003224141 7.9E-19  
 0.043946135 0.125734022 0.001660018 0 2.23E-18 4.41E-18 0.019709105 0  
 0.21090776 0 0 0.013308192 0.025499139 0.021717341 0.049991753  
 0.071709094  
 TCGA-BR-8380-01 0.190308486 0.003509937 0.07741452 1.18E-19 4.03E-19 0 0  
 8.18E-20 0.003359237 0 1.93E-19 0 2.85E-19 3.73E-18 0.047063181 0.193322113  
 0.008656104 0.001603835 0.000724275 0.003501133 0.048177349 0.000675121  
 0.304258153 0 0.416617385 0 0.00609766 0.263352488 0.030390525  
 0.025712581 0.033122057 2.25E-20 0.005771808 0.007631208 1.65E-18 0.011837638  
 0 0 0.026222025 0.031439555 0.001468085 0 0 0.024313891 0.02421234  
 5.26E-19 0.009926073 0.002643728 0 0.06928354 4E-18 3.29E-18 0.121466973  
 0.004854576 0 0.033639567 0 0.006013794 0 0.428000886 4.9E-18

|                 |             |             |             |             |             |             |             |
|-----------------|-------------|-------------|-------------|-------------|-------------|-------------|-------------|
|                 | 0.027511547 | 0.033632088 | 8.23E-19    | 0.005525378 | 0.234152336 | 0.239677713 |             |
| TCGA-BR-8381-01 | 0.356082228 | 0.004503395 | 0.064447142 | 0.254343347 | 0.084886658 |             |             |
|                 | 0.023304341 | 0.081724482 | 1.46E-20    | 0           | 0           | 0.009535378 | 0.155265671 |
|                 | 0.039561278 | 0.050032666 | 0.045909182 | 0.110209392 | 0.010323131 | 0           | 0.021607804 |
|                 | 0.009925365 | 0           | 0.434955048 | 4.81E-20    | 0.07121687  | 1.24E-18    | 0.00042905  |
|                 | 0.125210652 | 0.034823837 | 0.037274543 | 0.007937798 | 0.057681003 | 0.045541801 |             |
|                 | 0.030765082 | 0.003269946 | 0           | 0.002157983 | 0.098790702 | 0.068555761 | 0.01470807  |
|                 | 0           | 4.6E-18     | 0.118764992 | 0.009805968 | 0           | 0.005281705 | 0.000585116 |
|                 | 7.45E-19    | 0.031049963 | 0           | 0.117450332 | 0.046238134 | 0.037314897 | 0           |
|                 | 0.013770562 | 0.025310917 | 1.03E-18    | 0.302547384 | 0.001460537 | 0.095995041 |             |
|                 | 0.240063406 | 7.29E-18    | 0.328111848 | 0.042822815 | 0.370934663 |             |             |
| TCGA-BR-8382-01 | 0.160773243 | 0.003148177 | 0.086158695 | 0.052491752 | 0.071212132 |             |             |
|                 | 0.005923996 | 0           | 7.41E-19    | 0           | 7.85E-20    | 0           | 0.001425954 |
|                 | 0.047054725 | 0.025779328 | 0.036325589 | 1.17E-19    | 0           | 0.00572447  | 0.013340761 |
|                 | 0.585100327 | 0           | 0.073724941 | 3.86E-19    | 0.0000938   | 0.039038299 | 0.126940769 |
|                 | 0.114156814 | 0.009267177 | 0.025216322 | 0.028009044 | 0.010618491 | 0.003214429 |             |
|                 | 3.08E-20    | 0.001161444 | 0.003120698 | 0.060674868 | 0.024322033 | 0.012509273 | 0           |
|                 | 0.145039812 | 0.012482667 | 7.19E-19    | 1.23E-18    | 0.000954698 | 0.002884483 | 0.000562523 |
|                 | 0.052054836 | 0           | 0.035265301 | 0.065350931 | 0.019845464 | 3.48E-19    | 3.24E-19    |
|                 | 1.52E-19    | 0.063343892 | 0           | 0.203576651 | 0           | 0.112878302 | 0.137487048 |
|                 | 0.069352804 | 0.045106939 | 0.114459743 |             |             |             |             |
| TCGA-BR-8384-01 | 0.29691543  | 0.003524916 | 0.051981271 | 0           | 1.42E-18    | 0           | 0.019919561 |
|                 | 0           | 0.020552242 | 0           | 0.00343347  | 0.086814466 | 0.040290586 | 4.57E-18    |
|                 | 0.138899898 | 3.07E-21    | 9.95E-20    | 0.008465999 | 0.018415824 | 0.138772512 | 0.004235694 |
|                 | 0.134110231 | 0           | 0.516918338 | 0.020852659 | 0.00420103  | 0.42308314  | 0.096956473 |
|                 | 0.004624085 | 0.072853104 | 0.001122443 | 0.010128431 | 0.010343706 | 0.006695612 |             |
|                 | 0.018821279 | 0           | 4.5E-18     | 0.006717314 | 0.032548189 | 0.014000963 | 0           |
|                 | 0.062359455 | 0.022199055 | 3.09E-18    | 0.014031466 | 0.0025302   | 3.4E-18     | 0.070864389 |
|                 | 4.74E-18    | 0           | 0.127589865 | 1.6E-18     | 0.000876582 | 0.08348294  | 0           |
|                 | 6.16E-20    | 0.461146135 | 0           | 5.61E-18    | 0.027093995 | 0           | 0.089210134 |
|                 | 0.418818017 |             |             |             |             |             | 0.329607883 |
| TCGA-BR-8483-01 | 0.003174915 | 0.00380414  | 0.014508817 | 4.84E-19    | 0           | 0           | 9.92E-19    |
|                 | 0.024964666 | 1.64E-19    | 1.92E-19    | 0           | 0           | 9.06E-20    | 0           |
|                 | 0.000654423 | 0           | 0           | 2.7E-18     | 0.001696416 | 0.619461305 | 0           |
|                 | 1.67E-19    | 0.063425792 | 0.027930011 | 0.04914597  | 2.64E-19    | 0           | 0           |
|                 | 0.002647576 | 0           | 0.000836076 | 0           | 0.091624111 | 0.031816    | 2E-19       |
|                 | 0           | 0.002816717 | 0           | 2.65E-18    | 0.101670819 | 0           | 1.07E-18    |
|                 | 0           | 0           | 0           | 0.021693887 | 0           | 0.277156559 | 9.63E-19    |
|                 | 2.89E-19    | 0.002895995 | 0.024684773 | 0.027580768 |             |             |             |
| TCGA-BR-8484-01 | 0.287357463 | 1.36E-20    | 1.06E-17    | 0.172675175 | 0.010537127 | 0.035224593 |             |
|                 | 0.053438406 | 0.021275475 | 0.005794627 | 0           | 0.006588952 | 0.054464772 | 0.070649488 |
|                 | 0.006803706 | 0.121972931 | 0.016       |             |             |             |             |

|                 |             |             |             |             |             |             |             |
|-----------------|-------------|-------------|-------------|-------------|-------------|-------------|-------------|
| 0.050325211     | 0.051259765 | 0.012919215 | 0.006980728 | 8.28E-22    | 0.03885083  |             |             |
| 0.046656049     | 0.012896371 | 0.016656964 | 1.61E-18    | 2.12E-17    | 0.005762771 | 3.46E-19    |             |
| 0.003281993     | 0.003589046 | 0.001363448 | 0           | 0.000176403 | 7.57E-19    | 0.036629658 |             |
| 0.054698005     | 0.027858742 | 0           | 0           | 0           | 0.018459026 | 0           | 0.32508125  |
| 0.013809284     | 0.064033872 | 0.005746436 | 0.26189142  | 0.045990177 | 0.307881597 |             |             |
| TCGA-BR-8485-01 | 0.146808414 | 4.32E-20    | 0.10164216  | 0.041076383 | 0.075899366 |             |             |
| 0.013981347     | 2.84E-20    | 6.82E-20    | 0           | 2.71E-18    | 0.002903098 | 0.03231377  | 0.053775977 |
| 0               | 0.037585925 | 0.05051266  | 0.003571323 | 0.00737077  | 2.63E-19    | 0.00381816  |             |
| 0.032857626     | 0.002222276 | 0.462039134 | 0           | 0.036157034 | 0           | 0.016059839 |             |
| 0.130685419     | 0.040219979 | 0.033163358 | 0.013477353 | 0.005040853 | 0.014687091 |             |             |
| 0.016355032     | 0.002648549 | 0.002031559 | 8.26E-19    | 0.011697122 | 0.038969462 |             |             |
| 0.042454286     | 2.32E-18    | 6.57E-18    | 0           | 0.010831733 | 4.47E-19    | 0.002006164 | 0.001121632 |
| 5.84E-20        | 1.32E-17    | 0.01230178  | 1.11E-17    | 0.075750506 | 0.086304005 | 0.025084048 | 0           |
| 1.65E-20        | 3.48E-19    | 0.031094491 | 1.15E-19    | 0.323772124 | 0.003164428 | 0.084044882 |             |
| 0.099116129     | 1.24E-18    | 0.058079995 | 0.03450733  | 0.092587325 |             |             |             |
| TCGA-BR-8486-01 | 0.168145819 | 6.1E-19     | 0.076503833 | 0           | 0.056236539 | 0.007441399 |             |
| 0.022257103     | 5.76E-19    | 0.009376763 | 0.002272627 | 0           | 0           | 0.018427093 | 0.001844622 |
| 0.046498991     | 0.028875127 | 0.003099598 | 0           | 0           | 0.008928541 | 0.130674711 |             |
| 0.014234988     | 0.549023912 | 1.84E-19    | 0           | 0           | 0.008278354 | 0.209958836 | 0.068781195 |
| 0.038504285     | 0.050557061 | 0.012501372 | 0.023992538 | 0.019260569 | 0.001745858 |             |             |
| 0.001571332     | 0           | 0           | 0.05828463  | 0.03459265  | 0           | 0           | 0.066003367 |
| 1.19E-18        | 0.000572888 | 0.001950463 | 2.59E-18    | 0.036229192 | 0           | 0.020344047 |             |
| 0.116038286     | 0.015025965 | 0           | 0           | 4.17E-18    | 0.040612679 | 3.27E-18    | 0.208877682 |
| 0.007905092     | 0.057879176 | 0.080953446 | 0.004784572 | 0.026240814 | 0.065337355 |             |             |
| 0.09157817      |             |             |             |             |             |             |             |
| TCGA-BR-8487-01 | 0.156203987 | 0.006070782 | 0           | 0.055238731 | 0.06439732  | 0.006349287 |             |
| 0               | 2.74E-18    | 0           | 0.009453281 | 0.017597186 | 0.0037525   | 0.00502802  | 0.005926184 |
| 0               | 0.009383779 | 0.044009638 | 0.008496257 | 0           | 0.002492161 | 1.18E-18    | 1.44E-19    |
| 0.5652769       | 1.25E-19    | 0           | 3.41E-18    | 0.002031611 | 0.004852923 | 0.012182759 |             |
| 0.050848519     | 0.003688323 | 0.072264455 | 0.049523937 | 0.02834806  | 0.009424396 | 0           |             |
| 0               | 0.017481467 | 0.07350626  | 0.003591954 | 1.28E-19    | 8.02E-19    | 0.036533677 |             |
| 0.002136509     | 0.00265234  | 1.43E-18    | 0.000496639 | 0           | 0.000587482 | 0.047859274 | 0           |
| 0.041330409     | 0.032950811 | 0.014394461 | 0           | 1.83E-19    | 0.011211988 | 0.031879801 | 0           |
| 0.283317367     | 2.15E-18    | 0.15629807  | 0.073940001 | 6.85E-19    | 0.095839817 | 0.003035391 |             |
| 0.098875208     |             |             |             |             |             |             |             |
| TCGA-BR-8588-01 | 0.280281533 | 0.000563202 | 0.075206688 | 0.1228593   | 0.035794833 |             |             |
| 0.004062748     | 0           | 3.32E-18    | 0           | 0           | 0.002860588 | 0.025682992 | 0.054310381 |
| 2.64E-18        | 0.06466337  | 0.083421067 | 0.020499977 | 0.010109399 | 3.9E-20     | 0.012330283 |             |
| 0.053906147     | 0.005152221 | 0.515520035 | 0           | 0.116931492 | 5.45E-20    | 0.005841104 |             |
| 0.191004429     | 0.044593029 | 0.052522999 | 0.026148598 | 0.030631936 | 0.031886524 |             |             |
| 0.027174358     | 0.005142617 | 0.005411815 | 0.006232496 | 0.057065269 | 0.068964124 |             |             |
| 0.027463797     | 0.020588699 | 0           | 1.49E-18    | 0.028035228 | 0           | 0.006990543 | 0.000710694 |
| 0.003560793     | 5.08E-18    | 0.046528455 | 4.11E-20    | 0.020915189 | 0.050390578 | 0.020391233 |             |
| 0               | 0.041382307 | 0.003625112 | 0.036834665 | 0.003220632 | 0.392830338 | 0           |             |

|                 |             |             |             |             |             |             |             |
|-----------------|-------------|-------------|-------------|-------------|-------------|-------------|-------------|
|                 | 0.042502458 | 0.1460825   | 0           | 0.15063256  | 0.085700421 | 0.236332981 |             |
| TCGA-BR-8589-01 | 0.215173103 | 0           | 0           | 0.09376136  | 0.212744973 | 0.027580942 |             |
|                 | 0.017762451 | 0           | 1.31E-18    | 3.77E-17    | 0.019586542 | 0.153152416 | 0.220529669 |
|                 | 0.013924191 | 0.295964554 | 7.26E-19    | 0.041188286 | 0.0314988   | 0           | 0.032910924 |
|                 | 0.011274307 | 0           | 0.463655296 | 6.31E-19    | 0           | 7.43E-18    | 0.005091374 |
|                 | 0.312836915 | 0.033143513 | 0.004754308 | 0.098320078 | 0.065640253 | 0.031919485 |             |
|                 | 0.00465404  | 0           | 0           | 0.012509482 | 0.076148577 | 0.000572032 | 0           |
|                 | 4.56E-19    | 1.85E-17    | 0.008885909 | 0           | 0.003545006 | 0.0000223   | 3.74E-20    |
|                 | 0           | 0.055530082 | 0.028817798 | 0.089367731 | 0.04403069  | 0.014303439 | 2.14E-18    |
|                 | 0           | 0.008334642 | 0.025383206 | 0           | 0.220586036 | 0.015922783 | 0.111656588 |
|                 | 0.26979092  | 7.76E-18    | 0.255199212 | 0.005637153 | 0.260836365 |             |             |
| TCGA-BR-8590-01 | 0.272747284 | 3.57E-19    | 0.046025909 | 0.102343766 | 0           | 0.010788107 |             |
|                 | 0.030893391 | 0.00190176  | 0.001237237 | 0           | 0.000745498 | 0.020093484 | 0.051383851 |
|                 | 3.56E-18    | 0.10109849  | 0.117866567 | 0.030831209 | 2.17E-22    | 7.87E-20    | 0.020531284 |
|                 | 0.026361045 | 0.021867841 | 0.581462766 | 0           | 0.168605972 | 0.016726191 | 0.005728904 |
|                 | 0.163612946 | 0.090871167 | 0.055466234 | 0.012639629 | 0.046017094 | 0.030244294 |             |
|                 | 0.084536507 | 0.011019822 | 0.006584822 | 0.001040473 | 0.021006914 | 0.044761121 |             |
|                 | 0.069739002 | 0.008885522 | 1.48E-19    | 0           | 0.013301184 | 5.03E-21    | 0.004820917 |
|                 | 0.001813801 | 0           | 0           | 0.016926732 | 2.72E-18    | 9.77E-20    | 0.071862881 |
|                 | 0.007626487 | 0.000398101 | 0.026737212 | 1.37E-18    | 0.028790392 | 5.93E-19    | 0.402512477 |
|                 | 0           | 0.037977133 | 0.048330487 | 2.47E-18    | 0.155107048 | 0.097483509 | 0.252590557 |
| TCGA-BR-8591-01 | 0.232263891 | 0.001935341 | 0.004568457 | 0.070664866 | 0.060567274 |             |             |
|                 | 0.022713631 | 8.51E-19    | 0.00125911  | 7.7E-19     | 0           | 6.52E-20    | 0.000919626 |
|                 | 0.009080969 | 0.012368682 | 0.057924131 | 0.018131571 | 0.026064694 | 0.001566482 | 0           |
|                 | 0.014253593 | 0.032623649 | 1.19E-18    | 0.590490749 | 0           | 0.041806298 | 0           |
|                 | 0.002159649 | 0.039857176 | 0.087348434 | 0.074805432 | 0.020076811 | 0.02767585  | 0.034628597 |
|                 | 0.019383666 | 0.014593101 | 0.001425044 | 0.003133034 | 0.018682217 | 0.06752739  | 0.030070171 |
|                 | 4.24E-20    | 0           | 0.030036647 | 0.024037454 | 0.00088491  | 0.001745071 | 0.0000627   |
|                 | 8.3E-20     | 1.07E-19    | 0.015707393 | 4.45E-20    | 0.050663998 | 0.078918738 | 0.032358237 |
|                 | 0           | 1.14E-19    | 0.007269    | 0.031253481 | 0           | 0.374619589 | 7.17E-19    |
|                 | 0.08949428  | 0.187636811 | 0.001605386 | 0.086244098 | 0.038182644 | 0.124426742 |             |
| TCGA-BR-8592-01 | 0.246480702 | 0.01470579  | 0.083576987 | 0.158477388 | 0           | 0           |             |
|                 | 0.020651353 | 0           | 0.017418502 | 0           | 0.001661668 | 0.029688281 | 0.020057887 |
|                 | 1.09E-18    | 0.065959742 | 0.122850728 | 0.058730996 | 0           | 0.006186317 | 0.004832588 |
|                 | 0.085943143 | 3.32E-19    | 0.249006482 | 0           | 0.444822737 | 0.01729412  | 0.006432977 |
|                 | 0.320571412 | 5.1E-18     | 0.014780672 | 0.057803299 | 1.42E-18    | 0.014069856 | 0.016085129 |
|                 | 0           | 0.014394031 | 0           | 0.060298578 | 0.015969488 | 0.037692028 | 1.32E-19    |
|                 | 4.5E-19     | 0           | 0.044044942 | 0.01701552  | 0.005321995 | 0.013197611 | 0           |
|                 | 0           | 0.043404031 | 4.12E-18    | 0           | 0.127546105 | 0.0121671   | 3.47E-19    |
|                 | 0.039486885 | 3.29E-18    | 0.007224201 | 0           | 0.43371737  | 0           | 2.06E-19    |
|                 | 0.017545905 | 0           | 0.128665504 | 0.272735835 | 0.401401339 |             |             |
| TCGA-BR-8676-01 | 0.173793368 | 0.000820653 | 0           | 0.027540726 | 0.080922889 | 0.006092414 |             |
|                 | 0           | 0           | 3.75E-18    | 8.8E-18     | 0.02948525  | 0.119060335 | 0.117496999 |
|                 | 0.02307555  | 0.115273424 | 0           | 0.010190061 | 0.018266715 | 1.28E-18    | 0.012921049 |
|                 | 0.028172082 |             |             |             |             |             |             |

|                 |             |             |             |             |             |             |             |             |             |
|-----------------|-------------|-------------|-------------|-------------|-------------|-------------|-------------|-------------|-------------|
|                 | 9.3E-20     | 0.329943256 | 7.64E-19    | 0           | 0           | 0           | 0.088714285 | 0.145692402 | 0.026339057 |
|                 | 0.009757352 | 0.062838789 | 0.048882115 | 0.020005483 | 0.006175083 | 0           | 1.53E-19    |             |             |
|                 | 0.005774195 | 0.153926314 | 8.01E-18    | 0.03793546  | 5.74E-19    | 4.29E-18    | 0.034252624 |             |             |
|                 | 0.016725422 | 4.1E-19     | 0.002411166 | 0           | 0           | 0.048395209 | 9.46E-19    | 0.059223812 | 0           |
|                 | 0.02625734  | 4.57E-18    | 0           | 0.01863981  | 0.00632077  | 6.06E-19    | 0.394464988 | 0           |             |
|                 | 0.200192167 | 0.369924583 | 2.39E-18    | 0.177647627 | 0.014496367 | 0.192143995 |             |             |             |
| TCGA-BR-8677-01 | 0.327519366 | 0.159666237 | 0.039702872 | 0.012304257 | 0.077041479 |             |             |             |             |
|                 | 1.59E-18    | 0.01883618  | 1.29E-18    | 7.55E-19    | 0           | 0.014630312 | 0.112759197 | 0.123714885 |             |
|                 | 0.004995252 | 0.030087952 | 0.121742787 | 0.000330752 | 0.001338085 | 0           | 0.013165761 |             |             |
|                 | 0.167379741 | 9.81E-19    | 0.402273265 | 0           | 0.212215014 | 1.43E-18    | 0.007673499 |             |             |
|                 | 0.253142014 | 0.076448022 | 0.041341335 | 0.105543699 | 0.007565158 | 0.027065743 |             |             |             |
|                 | 0.011504022 | 0.000719051 | 0.008936028 | 3.18E-18    | 0           | 0.039819931 | 0.06315715  | 0           |             |
|                 | 2.55E-19    | 5.74E-18    | 0.094786371 | 0           | 1.39E-18    | 0.000531823 | 0           | 0           | 0.03996665  |
|                 | 1.26E-17    | 0.001919835 | 0.103684112 | 0.010673614 | 0           | 0.002228741 | 2.96E-18    |             |             |
|                 | 0.015485535 | 0           | 0.23131222  | 3.53E-19    | 0.065125398 | 0.107471649 | 1.84E-17    |             |             |
|                 | 0.097675616 | 0.269630496 | 0.367306112 |             |             |             |             |             |             |
| TCGA-BR-8678-01 | 0.102946942 | 0.005685167 | 0.020707035 | 1.36E-21    | 0.153397883 |             |             |             |             |
|                 | 0.003365734 | 3.44E-18    | 0           | 0           | 1.01E-17    | 0.002352721 | 0.011071004 | 0           | 2.15E-18    |
|                 | 0.010248958 | 0.095447007 | 9.52E-19    | 0.018411732 | 0           | 7.15E-19    | 0.007335569 | 0           |             |
|                 | 0.397424885 | 0           | 0.012759737 | 0           | 0.000852685 | 0           | 0.000547734 | 0.06087158  |             |
|                 | 0.004170332 | 1.55E-19    | 0.006273506 | 2.25E-19    | 0           | 8.52E-21    | 0.010928267 | 0.002434269 |             |
|                 | 0.062710644 | 0.026785967 | 3.8E-18     | 0           | 0.073315019 | 0.003208394 | 0           | 0.002710283 |             |
|                 | 0.005252684 | 2.64E-18    | 1.47E-17    | 9.28E-19    | 0.046568178 | 0.013422371 | 0.076203873 |             |             |
|                 | 0.00905263  | 0           | 0           | 0.016722771 | 0.031036567 | 0           | 0.184122568 | 0           | 0.096475827 |
|                 | 0.239611416 | 0           | 0.007380669 | 0.012890237 | 0.020270906 |             |             |             |             |
| TCGA-BR-8679-01 | 0.08319871  | 0           | 0.006339295 | 0           | 0.024648989 | 0.000919646 | 0           | 0           |             |
|                 | 0           | 0           | 0.003181062 | 0           | 0           | 0           | 0.010313247 | 0.038644794 | 1.15E-18    |
|                 | 0.018751885 |             |             |             |             |             |             |             |             |
|                 | 6.81E-19    | 0.002826684 | 0.02018454  | 1.09E-19    | 0.545125468 | 0           | 0.082637329 | 0           |             |
|                 | 0.005834986 | 0.141168041 | 0.071421735 | 0.059300585 | 0.014932659 | 0.018954875 |             |             |             |
|                 | 0.019460102 | 0.01671061  | 0.004544118 | 0.003262785 | 0.000751673 | 1.13E-17    |             |             |             |
|                 | 0.036042465 | 0.004283023 | 0           | 0           | 1.57E-18    | 0.009381702 | 0           | 0           | 0.001619001 |
|                 | 0.00016776  | 6.88E-18    | 0.007342041 | 0           | 0.00092891  | 0.085753691 | 0.010190628 | 0           |             |
|                 | 0.024570688 | 0           | 0.032532152 | 2.65E-21    | 0.410490971 | 0           | 0.05733474  | 0.115440157 |             |
|                 | 8.97E-18    | 0.017662292 | 0.051410934 | 0.069073226 |             |             |             |             |             |
| TCGA-BR-8680-01 | 0           | 0.004588441 | 2.7E-18     | 0.013461254 | 0.069211054 | 0.002948484 |             |             |             |
|                 | 6.05E-18    | 0           | 2.01E-18    | 7.21E-18    | 0.012190456 | 4.46E-19    | 0           | 0           | 0.008011785 |
|                 | 1.72E-18    | 0.007230189 | 0.016152935 | 0           | 1.2E-18     | 1.42E-17    | 0           | 0.605865161 | 0           |
|                 | 0           | 0.000135742 | 0.003126049 | 0.045652561 | 0.071576234 | 1.2E-18     | 1.25E-19    | 0           |             |
|                 | 0.004522536 | 0.013167502 | 0           | 0.001437851 | 0.008000298 | 0.091219316 | 0.03997408  |             |             |
|                 | 0           | 0           | 0.0643661   | 0           | 0.004392879 | 0.006448633 | 0.000337291 | 1.52E-19    |             |
|                 | 1.45E-17    | 0.037429675 | 0.008745805 | 0.006113213 | 0.027773107 | 0.004716921 | 0           | 0           |             |
|                 | 0.017789327 | 0.04837615  | 8.54E-19    | 0.258207741 | 0           | 0.168694011 | 0.201386019 | 0           |             |
|                 | 0.017752504 | 0.002294221 | 0.020046725 |             |             |             |             |             |             |
| TCGA-BR-8682-01 | 0.197301727 | 0           | 0           | 0.048227087 | 0           | 3.73E-23    | 0.006124605 |             |             |

|                 |             |             |             |             |             |             |             |             |
|-----------------|-------------|-------------|-------------|-------------|-------------|-------------|-------------|-------------|
|                 | 6.05E-19    | 0.030433641 | 0           | 0           | 0.013659414 | 0.017584122 | 0           | 0.172109652 |
|                 | 0.094277819 | 0.032104465 | 0           |             | 0.012172808 | 0.030259036 | 0.045974793 | 0.021132645 |
|                 | 0.499651165 | 0           | 0.26761153  | 0.01023687  | 0.013882635 | 0.203689514 | 0.23990631  |             |
|                 | 0.052836661 | 0.0223572   |             | 0.023464102 | 0.024990578 | 0.051526285 | 0.012896048 |             |
|                 | 0.005192727 | 8.71E-20    | 0.004231674 | 0.009260739 | 0.050425137 | 0.011572381 | 0           | 0           |
|                 | 0.025303158 | 0           | 0.007206945 | 0.003635189 | 0.002988196 | 9.02E-18    | 0           | 1.08E-18    |
|                 | 4.03E-19    | 0.040846353 | 0           | 0.000273764 | 0.068705516 | 0           | 0.04171147  | 0           |
|                 | 0.360235569 | 0           | 0           | 0.006119297 | 2.37E-20    | 0.10946594  | 0.156793162 | 0.266259102 |
| TCGA-BR-8683-01 | 0.204041236 | 1.15E-20    | 0.08168179  | 6.44E-20    | 0.026062392 | 0.003591193 |             |             |
|                 | 0.00358805  | 2.63E-18    | 0.006878704 | 4.94E-18    | 0.001149023 | 0.017456419 | 0.007842978 |             |
|                 | 0           | 0.051994018 | 0.040931725 | 0.004686251 | 1.18E-21    | 2.32E-19    | 0.007829635 |             |
|                 | 0.104918053 | 0.012565547 | 0.572086046 | 2.04E-21    | 0.075271638 | 0           | 0.003811788 |             |
|                 | 0.194979992 | 0.017666403 | 0.06397882  | 0.044139393 | 0           | 0.009968508 | 0.007119367 |             |
|                 | 0.003321847 | 0.004675397 | 0           | 3.07E-18    | 0.004114786 | 0.050049315 | 1.97E-18    |             |
|                 | 6.56E-19    | 0           | 0.03721344  | 1.43E-18    | 1.81E-18    | 0.001588859 | 0.003193331 | 1.59E-18    |
|                 | 0.038132137 | 1.95E-18    | 0           | 0.227505461 | 0           | 0           | 6.73E-18    | 0.037069086 |
|                 | 3.39E-18    | 0.346326271 | 0.001424267 | 0.000965315 | 0.041650518 | 0.011774574 |             |             |
|                 | 0.029577852 | 0.090094846 | 0.119672697 |             |             |             |             |             |
| TCGA-BR-8686-01 | 0.395107827 | 0.002196928 | 0           | 0.209363292 | 0.102909323 | 0.007992836 |             |             |
|                 | 0.042298393 | 0           | 0.018973072 | 2.78E-18    | 0.00425819  | 0.121435392 | 0.125765235 |             |
|                 | 0.01787353  | 0.071460418 | 0.05627114  | 0.029093767 | 0.001741514 | 0.007934951 |             |             |
|                 | 0.017741977 | 0.120008827 | 0.002018769 | 0.35864842  | 0           | 0.201633511 | 5.94E-19    |             |
|                 | 0.005833667 | 0.240044875 | 0.015890707 | 0.018602874 | 0.071752496 | 0.023659392 |             |             |
|                 | 0.031231345 | 0.014271138 | 0.012144453 | 0.006521065 | 0.000291716 | 0.062953859 |             |             |
|                 | 0.046110721 | 0.001448703 | 0.015969074 | 9.88E-19    | 0           | 0.057260588 | 0.001832793 |             |
|                 | 0.027253295 | 0.000930394 | 0           | 0           | 0.0529782   | 0           | 0.038865289 | 0.083836765 |
|                 | 0.028654392 | 0           | 0           | 1.12E-18    | 0.002144808 | 0.002180916 | 0.347694474 | 0           |
|                 | 0.030911055 | 0.1181577   | 1.28E-20    | 0.268221566 | 0.161919633 | 0.430141199 |             |             |
| TCGA-BR-8687-01 | 0.103461615 | 0.003741591 | 1.75E-18    | 0           | 0.013308088 | 4.63E-21    | 0           | 0           |
|                 | 0.011680636 | 0.003190839 | 0           | 0.00246253  | 0           | 3.88E-18    | 0.015355627 | 0.035341409 |
|                 | 0.010335816 | 0.003591874 | 0           | 0.000496167 | 0.004495216 | 0.002535748 | 0.52445326  |             |
|                 | 0           | 0.055664388 | 0           | 0.002665482 | 0.066777622 | 0           | 0.045052371 | 0.009728772 |
|                 | 0.008519692 | 0.006698534 | 0.014677925 | 0.006280816 | 0.001723236 | 0           | 0           |             |
|                 | 0.023847439 | 0.009845131 | 0           | 0           | 9.08E-19    | 0.001772713 | 0.003061662 | 1.65E-18    |
|                 | 0.008110834 | 4.33E-19    | 2.61E-18    | 0.029367204 | 0.007581315 | 0.000167669 | 0.027488301 |             |
|                 | 0.013732688 | 0.001194062 | 0           | 3.27E-19    | 0.022026479 | 1.71E-18    | 0.445591562 | 0           |
|                 | 0.039372828 | 0.026996108 | 0           | 0.013529968 | 0.031950597 | 0.045480566 |             |             |
| TCGA-BR-8690-01 | 0.303820396 | 0.007929204 | 0.107019488 | 0.088020754 | 0.142679025 | 0           |             |             |
|                 | 0.022827261 | 0           | 1.27E-18    | 0           | 0.017029311 | 0.100183224 | 0.121102489 | 0.01105785  |
|                 | 0.031986439 | 0.021814799 | 0.018568415 | 0.00651851  | 0           | 0.013631538 | 2.01E-18    |             |
|                 | 1.12E-18    | 0.527957334 | 0           | 0.042306315 | 4.38E-18    | 0.002103653 | 0.082908432 |             |
|                 | 0.021784169 | 0.056948949 | 5.39E-21    | 0.067623383 | 0.087307746 | 0.0000599   |             |             |
|                 | 0.003609909 | 0           | 0.002812045 | 0.019301368 | 0.082228387 | 0.051591232 | 5.48E-18    |             |
|                 | 7.15E-18    | 0.088551109 | 0           | 0           | 0.004092397 | 0.002600898 | 8.53E-19    | 0.123104074 |

|                 |             |             |             |             |             |             |             |             |             |
|-----------------|-------------|-------------|-------------|-------------|-------------|-------------|-------------|-------------|-------------|
|                 | 0           | 0.073602102 | 0.043139946 | 0.020979016 | 0           | 0           | 0.004554501 | 0.040735028 |             |
|                 | 9.91E-20    | 0.252751856 | 0           | 0.258381282 | 0.079664396 | 0           | 0.182045872 | 0.025117759 |             |
|                 | 0.207163632 |             |             |             |             |             |             |             |             |
| TCGA-BR-A44T-01 | 0.378935415 | 1.17E-19    | 0.049897892 | 1.225672967 | 4.74E-17    | 0.040621267 |             |             |             |
|                 | 0.176654607 | 0           | 0           | 4.62E-17    | 0.024356338 | 0.190659221 | 0.176051025 | 0.010928309 |             |
|                 | 0.164137226 | 0.072014184 | 0.264959097 | 0.007834292 | 0           | 0.022129797 | 0.001575828 |             |             |
|                 | 2.91E-18    | 0.234260625 | 1.68E-19    | 0.281827181 | 1.4E-18     | 0           | 0.221790565 | 0.126715127 |             |
|                 | 0.013101366 | 0.010192597 | 0.003227798 | 0.009948638 | 0           | 0.004306902 | 0.020966045 |             |             |
|                 | 0           | 0.492788463 | 0.023067844 | 0.017567146 | 6.62E-18    | 0           | 0           | 0.006303212 |             |
|                 | 0.006766159 | 0.223601119 | 0.020945542 | 1.05E-18    | 1.4E-17     | 0.156879304 | 0           |             |             |
|                 | 0.02083214  | 0.06402802  | 0           | 4.36E-19    | 1.57E-17    | 0.099179006 | 0.019317837 | 0           |             |
|                 | 0.362785689 | 0           | 0.037860224 | 0.055336929 | 0           | 0.96399779  | 0.141701504 |             |             |
|                 | 1.105699294 |             |             |             |             |             |             |             |             |
| TCGA-BR-A44U-01 | 0.049634881 | 0.008957624 | 0.046591024 | 1.52E-19    | 0.001952018 | 0           |             |             |             |
|                 | 1.92E-18    | 6.69E-19    | 4.12E-18    | 1.19E-18    | 0.008891891 | 1.03E-18    | 0           | 5.32E-18    | 0.00494374  |
|                 | 0.024870751 | 0.004651905 | 0.00665401  | 0           | 1.59E-19    | 0.009814089 | 6.21E-19    |             |             |
|                 | 0.555120685 | 0           | 0.012657342 | 0           | 0.002421172 | 0.078550096 | 1.63E-18    | 0.054768001 |             |
|                 | 0.016103723 | 0.014321957 | 0.02146203  | 0.003483247 | 0.000237584 | 0.000387635 |             |             |             |
|                 | 0.000611495 | 3.26E-18    | 0.108283146 | 0.023204397 | 7.81E-19    | 0           | 0.05147807  |             |             |
|                 | 0.004962645 | 2.02E-19    | 0           | 0.001445032 | 0           | 1.9E-17     | 0.102569772 | 0           | 0           |
|                 | 0.033988939 | 0.005598612 | 9.73E-19    | 1.4E-17     | 1.04E-17    | 0.04760444  | 0           | 0.315244836 |             |
|                 | 0           | 0.119936034 | 0.058140922 | 0           | 0.00970636  | 0.015714528 | 0.025420888 |             |             |
| TCGA-BR-A452-01 | 0.023175177 | 0.000752163 | 0.010093121 | 0.060508818 | 0.024304924 | 0           |             |             |             |
|                 | 0           | 0           | 3.82E-18    | 0           | 0.026311381 | 0.083156613 | 0.021170363 | 2.75E-19    | 0.004288215 |
|                 | 0.025517675 | 0.01761195  | 0.027101178 | 1.05E-17    | 0           | 2.03E-18    | 7.71E-21    | 0.585262879 |             |
|                 | 0           | 5.75E-18    | 6.13E-18    | 0.001277226 | 0.016594915 | 0.024911452 | 0.090741055 |             |             |
|                 | 0.004997846 | 7.17E-20    | 0.000096    | 0           | 0           | 0.002614269 | 0.038037297 | 0.120407344 |             |
|                 | 0.052995171 | 0           | 4.02E-18    | 0.10772423  | 0.00929461  | 0.002517682 | 0.003295537 |             |             |
|                 | 0.011449385 | 9.15E-19    | 0           | 0.027311423 | 0           | 0.014025993 | 0.074562189 | 0.003483465 |             |
|                 | 0           | 0           | 0.031115483 | 0.058070348 | 0           | 0.18356189  | 0           | 0.138238786 | 0.14967211  |
|                 | 0           | 0.095776954 | 0.000376081 | 0.096153035 |             |             |             |             |             |
| TCGA-BR-A453-01 | 0.233436773 | 0.047231336 | 0.111477257 | 0           | 0           | 0           | 4.95E-20    | 0           |             |
|                 | 1.49E-18    | 0           | 0.014521697 | 0.036023885 | 0.002492614 | 1.01E-17    | 0.082037502 |             |             |
|                 | 0.205673756 | 5.38E-18    | 0.001374665 | 0.025735371 | 0.014892009 | 0.125021541 |             |             |             |
|                 | 4.96E-18    | 0.070472766 | 0           | 0.626769299 | 0.005938973 | 0.0000971   | 0.388552769 |             |             |
|                 | 0.163338891 | 0.001794728 | 0.091174471 | 0.008299718 | 0.01900038  | 0           | 0.002445344 |             |             |
|                 | 0.016495175 | 0.011245357 | 0           | 0.050643917 | 0.004644242 | 0.000292347 | 9.03E-19    |             |             |
|                 | 0.099550307 | 0.069176664 | 0.034990924 | 0           | 0.026743494 | 1.38E-19    | 1.09E-17    |             |             |
|                 | 0.203832928 | 0           | 0           | 0.263498561 | 8.29E-20    | 0           | 0.034785185 | 7.08E-18    | 0           |
|                 | 0.008172068 | 0.487337022 | 0           | 0.069023822 | 0.073081124 | 3.06E-18    | 0.041302202 |             |             |
|                 | 0.399511088 | 0.44081329  |             |             |             |             |             |             |             |
| TCGA-BR-A4CR-01 | 0.046379915 | 0           | 0           | 0.005937531 | 0.0950329   | 1.92E-20    | 0           |             |             |
|                 | 1.65E-18    | 1.63E-17    | 0           | 0.004277331 | 3.09E-18    | 6.92E-18    | 8.06E-18    | 0.006633256 | 0           |
|                 | 0.035995386 | 0.008889    | 0           | 0           | 0.00010615  | 2.2E-18     | 0.210116775 | 9.7E-19     |             |

5.57E-19 0 0.002705853 0.009185614 0 0.009020523 0.001992562 0  
 0.000646281 0.0021831 0.004152798 8.54E-21 0 3.29E-18 0.043691775  
 0.022008439 2.25E-17 3.41E-18 9.45E-18 4.73E-20 0 0.00168916 0.054746158  
 3.91E-19 4.62E-17 0 0.011216832 0.000711675 0.202439157 0.009258019  
 6.42E-18 0 0.017238861 0.011000301 7.66E-18 0.261816184 1.59E-18 0.137515715  
 0.101733787 0 0.006726886 0.0000531 0.006779961  
 TCGA-BR-A4CS-01 0.040671451 0.00333905 0 0 0.022369189 1.65E-19 0.013596603  
 7.7E-18 2.04E-19 0.03948446 0.001223728 0.000879412 0 0 0.0054178  
 0.041922124 4.52E-18 0.006051724 1.41E-18 0.00200949 0.059421617 1.04E-19  
 0.536230497 1.66E-19 0.012754221 1.67E-18 0.013682034 0.14792165 0.098551246  
 0.049299523 0.041915448 0.014432676 0.003548174 0.015787138 0.003300633  
 0.005328237 0.011125113 0 0.073025041 0.023150828 0.01838225 0  
 0.101246628 0.043600881 0 0 0.001220715 0.003560479 4.26E-18 0.119853557  
 0 0.031642646 0.045490274 0.001898555 0 0 2.22E-18 0.042485076  
 3.59E-19 0.381897004 0 0.119007246 0.005865719 0 0.028376627 0.037757444  
 0.066134071  
 TCGA-BR-A4IU-01 0.297930738 1.05E-18 0.033462837 0.336569147 3E-17 0  
 0.026336915 3.82E-18 0.000594132 0 0.004184607 0.051842516 0.033494017 0  
 0.124404551 0.119710415 0.076805008 0.003117721 0.008293677 0.013862743  
 0.041184595 0 0.361973088 0 0.385553241 0.019655435 1.84E-20 0.335468006  
 4.11E-18 0.022633666 0.027795946 0.003418978 0.016050226 0.018538391  
 0.008449041 0.023067136 2.91E-18 0.158602439 0.028499382 0.017734438  
 2.32E-18 0 0 0.023207234 0.018230262 0.037103133 0.008806651 0  
 1.58E-17 0.030702314 3.64E-18 1.88E-18 0.07107274 9.67E-20 0.003606284  
 0.043363726 4.62E-18 0.015261708 0 0.511797728 0 0 0.090683668 0  
 0.27609495 0.213368918 0.489463868  
 TCGA-BR-A4IV-01 0.073543345 0.137345736 0.102328694 1.64E-19 0 0 0  
 6.76E-18 0 0 0.002871947 0.017003887 0 1.28E-18 0.097943763 0.214290284  
 0.0015736 0.00334468 0.00882921 0.016648941 0.122973129 9.19E-21  
 0.081389988 0 0.557625061 0.006041425 0.002112744 0.37969027 0.304128962  
 0.000868048 0.075684607 5.87E-19 0.005091262 0.00552096 0 0.018240932 0  
 4.05E-18 0.007743346 0.017866953 0.009149161 0 0 0.067623612 0.039369851  
 0 0.016998602 0.000435849 0 0.057595789 3.97E-18 1.8E-17 0.144058145  
 7.42E-19 9.32E-19 0.059418724 0 0.002725793 0 0.540293851 0 0  
 0.063682497 0 0.028825226 0.408971963 0.437797189  
 TCGA-BR-A4IY-01 0.32946543 0.006723598 0.149094182 0.111957438 0.060690123  
 0.008940987 0.015802981 0 0.005966104 0 0.007372637 0.034914425  
 0.044531377 0.027927082 0.077691546 0.014504828 0.047830828 0.003040697 0  
 0.048153291 0.001767961 0 0.582675721 5.18E-19 0.171640761 0 2.2E-19  
 0.004893439 0.422571165 0.232933534 0.0000022 0.036413371 0.047418838  
 0.00530405 0.010728919 3.6E-21 1.11E-22 0.007875367 0.041965051 0.009241998  
 0.028926466 0 0.206386024 0.014388736 0 0.00399011 0 0 5.68E-19  
 0.063396168 0 0.043897001 0.123112448 0.026732466 0 5.73E-19 0.004889199  
 0.090199223 0 0.26853792 0.009706101 0.126977088 0.18462347 0.006036152

[illegible]

|                 |             |             |             |             |             |             |             |             |
|-----------------|-------------|-------------|-------------|-------------|-------------|-------------|-------------|-------------|
|                 | 0.051113373 | 0.025805952 | 0.023710277 | 0.013603679 | 0.005393686 | 0.008522002 |             |             |
|                 | 0.000698263 | 0           | 0.020451697 | 0.054491595 | 0.005259515 | 0           | 0           | 0.04076358  |
|                 | 0.001231125 | 1.19E-18    | 0.004133297 | 8.87E-19    | 0           | 0.05277016  | 0           | 0           |
|                 | 0.003070986 | 2.68E-18    | 7.61E-19    | 3.54E-18    | 0.053981769 | 0.005139106 | 0.463229672 |             |
|                 | 1.06E-17    | 0.01681045  | 0.093065766 | 0           | 0.038971981 | 0.216965814 | 0.255937795 |             |
| TCGA-BR-A4J6-01 | 0.039048983 | 0           | 0           | 0.039763672 | 0.003671021 | 7.59E-20    | 0.007951332 |             |
|                 | 1.27E-18    | 0.012923394 | 0.002526938 | 0.009650958 | 0.02254301  | 0.013665534 |             |             |
|                 | 1.23E-18    | 0.033064544 | 0.060307602 | 0.028094493 | 0.005084771 | 0           | 0.000449011 |             |
|                 | 2.01E-19    | 0.001241989 | 0.629385926 | 5.07E-19    | 0.138654041 | 0           | 0.003345868 |             |
|                 | 0.138405225 | 0.00178857  | 0.087356475 | 0.005284164 | 0.003997651 | 0.004132406 |             |             |
|                 | 0.00968116  | 0.005378712 | 0.001949187 | 0.005776366 | 2.27E-18    | 0.058776862 |             |             |
|                 | 0.029558324 | 0           | 3.14E-18    | 0.007669152 | 0           | 0.008474397 | 0           | 0.004080293 |
|                 | 3.83E-19    | 0           | 0.011007682 | 0           | 0           | 0.011614296 | 0.039570216 | 0           |
|                 | 0.043485119 | 0.006345312 | 0.457990087 | 4.39E-18    | 0.055680222 | 0           | 0           | 0.04891603  |
|                 | 0.069327021 | 0.118243051 |             |             |             |             |             |             |
| TCGA-BR-A4J7-01 | 0.3286776   | 0           | 0.040269097 | 0.017101689 | 0           | 1.11E-18    | 0.036422932 |             |
|                 | 2.83E-18    | 0           | 2.03E-18    | 0.030643645 | 0.199948571 | 0.14885102  | 0.072769906 |             |
|                 | 0.039073261 | 0.126489735 | 0           | 0.011788594 | 6.78E-19    | 0.01068911  | 0.050647928 |             |
|                 | 2.22E-18    | 0.288798483 | 0           | 0.419730749 | 0           | 0.001958697 | 0.350355526 | 0           |
|                 | 0.016457064 | 0.040577837 | 0.010495392 | 0.024726953 | 0.007232597 | 0.002136048 |             |             |
|                 | 0.010078617 | 0           | 8.36E-19    | 0.01500705  | 0.046228562 | 0.021268867 | 1.2E-18     | 2.9E-18     |
|                 | 0.025820482 | 0.00517487  | 2.33E-18    | 0.009271009 | 1.56E-19    | 6.09E-18    | 0.047430612 | 0           |
|                 | 0.015337497 | 0.123089593 | 0.002235661 | 5.08E-19    | 0           | 0           | 0.014278686 | 0           |
|                 | 0.462499771 | 0           | 0.057521081 | 0.013094986 | 9.93E-18    | 0.174426451 | 0.235189338 |             |
|                 | 0.40961579  |             |             |             |             |             |             |             |
| TCGA-BR-A4J8-01 | 0.166229281 | 0.007751538 | 0.075228752 | 7.83E-19    | 4.15E-19    | 0           | 0           |             |
|                 | 6.52E-19    | 0.004194636 | 0           | 0.006087413 | 0.000754173 | 0           | 8.3E-19     | 0.006437656 |
|                 | 0.120411703 | 2.68E-20    | 0.00529459  | 0.000258645 | 7.38E-20    | 0.060638144 | 4.48E-20    |             |
|                 | 0.558149066 | 8.95E-21    | 0.162852607 | 0           | 0.001102295 | 0.286622553 | 6.54E-20    |             |
|                 | 0.041171826 | 0.046453344 | 0           | 0.00901315  | 0.007052007 | 1.98E-18    | 0.011488207 |             |
|                 | 0.002430517 | 0           | 0.036514664 | 0.038007698 | 2.21E-18    | 0           | 0.004489563 | 0.031609735 |
|                 | 0           | 2.15E-18    | 0.00785592  | 3.08E-19    | 1.96E-17    | 0.079864613 | 0           | 0           |
|                 | 0.122001501 | 0           |             |             |             |             |             |             |
|                 | 2.48E-18    | 0           | 3.21E-18    | 0.019400023 | 0           | 0.290450008 | 1.82E-17    | 0.111757316 |
|                 | 4.26E-20    | 0           | 0.000502782 | 0.115621145 | 0.116123927 |             |             |             |
| TCGA-BR-A4J9-01 | 0.233441867 | 3.07E-19    | 0.032834029 | 0.115334325 | 5.91E-19    | 0           |             |             |
|                 | 0.01064174  | 6.57E-18    | 0.007044906 | 0           | 0.005057047 | 0.034963058 | 0.00078575  |             |
|                 | 1.77E-18    | 0.024978814 | 0.169343114 | 0.056162355 | 0.004703082 | 0           | 0.003163602 |             |
|                 | 0.067607586 | 0           | 0.154213088 | 6.87E-20    | 0.409146984 | 0           | 5.48E-19    | 0.435283338 |
|                 | 2.2E-17     | 0.01186675  | 0.048839037 | 0           | 0.002257919 | 0.002644317 | 1.15E-18    |             |
|                 | 0.024556731 | 3.7E-18     | 0.037158057 | 0.013741864 | 0.026168017 | 0           | 0           | 0           |
|                 | 0.028350526 | 0.038835973 | 0.001669828 | 0.019550656 | 0           | 0           | 0.04604538  |             |
|                 | 3.84E-18    | 2.46E-18    | 0.158689996 | 0.012803914 | 3.69E-19    | 1.38E-18    | 4.97E-18    | 0.005382781 |
|                 | 0           | 0.616389019 | 0           | 0.006676455 | 0.054773256 | 0           | 0.102307323 | 0.238377285 |
|                 | 0.340684609 |             |             |             |             |             |             |             |

TCGA-BR-A4PD-01 0.194170715 3.4E-19 0 0.084208144 0.081568121 0 7.88E-19 0  
0.01776647 0 0.009411709 0.007304634 0.022364693 7.72E-18 0.046868755  
1.02E-19 0.076482673 0.005644693 1.43E-18 0.013318093 0.024932914 0.004727319  
0.566785661 9.96E-19 0 5.76E-18 0.009328643 0.086582999 0.184839018  
0.047246255 0.013698481 0.035179115 0.042633606 0.026069478 0.001308076  
0.00882886 2.62E-19 0.042862889 0.032228081 0.025652623 0.009056328 0 0  
0.013971737 5.07E-19 0 0.000910316 1.7E-20 2.57E-18 0.056246769 0  
0.051566616 0.001599708 0.028314238 0 0 1.92E-19 0.024207117 0  
0.297177416 0.000177417 0.111236071 0.057918291 1.53E-20 0.10340114  
0.012466457 0.115867596

TCGA-BR-A4PE-01 0.212776057 0.002511798 0.012232791 0.060139114 0.083394271  
0.019297389 0.031734982 0 0.003283581 0.005259089 0 0.002612022  
0.034550298 0 0.069247202 1.32E-18 0.046019047 0.006588406 0 0.018421274  
0.014505802 0.000778731 0.454840167 1.76E-19 0.011276673 0 0 0.001258247  
0.114052486 0.035260515 0.007924649 0.068376961 0.066363552 0.003957613  
0.003291536 0.002865401 0.004981259 0.011453075 0.077747531 0.006531631  
0.003590556 6.27E-19 0.09870147 0.012010584 7.15E-19 3.58E-19 0.000388256  
5.54E-20 2.52E-18 0.06573924 2.55E-18 0.024618893 0.118961374 0.008690585  
9.01E-21 7.2E-18 0.00874077 0.037051016 0 0.317515162 0 0.189968678  
0.139386656 0 0.104806795 0.014147137 0.118953932

TCGA-BR-A4PF-01 0.159866067 1.46E-19 6.36E-18 0.047583396 0.080460832 0.028793892  
1.62E-19 0.003166203 0 0.021148984 0.003101471 0.018515089 0.051647307 0  
0.02410908 0 0.029172371 0.016369444 3.49E-18 0.007473076 1.45E-18  
6.47E-19 0.422828619 0 0 9.87E-18 0.004189363 0.016072366 0.034019523  
0.033177228 0 0.087121331 0.0732791 0.030617113 0.014300797 0.000832018  
0 0 0.047786243 0.018454003 0.016746935 0 0 1.36E-18 0.000607  
0.003192081 0 0.046961116 1.82E-18 0.011577916 0 0.037276119 0.043842283  
0.006097087 0.000964607 5.08E-18 0.004771551 0.017614009 9.64E-18 0.279034031  
1.96E-19 0.019627615 0.265079105 0.013769488 0.161245296 7.97E-19 0.161245296

TCGA-BR-A4QI-01 0.186032817 4.42E-19 2.53E-19 0.013333267 0.052726364 0  
1.82E-18 3.23E-18 0.016305566 0.017862834 0.004908321 0.006550596 0.02417118  
1.04E-17 0.013994248 0.005743803 0.010728081 0.011873183 0 0.006272659  
2.27E-18 1.39E-19 0.549004783 2.37E-19 0.021751726 0 0.005837532 0.023870784  
0 0.060047741 0.000488705 0.020533041 0.020077474 0.015017167 0.0061469  
0 1.19E-18 0.003358639 0.043907017 0.018749256 9.07E-19 1.44E-18 0  
5.95E-19 0.005508274 7.29E-19 0.001582038 0.000156501 0 0.132780889  
8.04E-18 0.015607343 0.027125759 0.011467819 0 0 0 0.026252904 0  
0.330418284 1.5E-17 0.110381873 0.106971669 0.004126107 0.035328643  
0.010875863 0.046204506

TCGA-BR-A4QL-01 0.078635338 0.001390632 0.016070942 0.030266042 4.21E-19  
0.009386488 0 0 0.016556092 0.015457133 0.033456216 0.025575686  
0.032697126 0.002007011 0.002257036 0.001310112 0.028508548 0.018850108  
1.03E-18 0.001203142 0 0 0.500439002 0 3.12E-18 0 0.000164855  
0.010179495 0 0.067242752 0 0.012709695 0.019718852 0.003633365

|                 |             |             |             |             |             |             |             |
|-----------------|-------------|-------------|-------------|-------------|-------------|-------------|-------------|
| 0.005609189     | 0           | 0.001282123 | 0.012191889 | 0.113339991 | 0.017137818 | 5.48E-20    |             |
| 0.00039382      | 0.008463998 | 0           | 0.010758164 | 0           | 0.001650376 | 1.15E-18    | 0.006552051 |
| 0.062748454     | 0           | 0.019627801 | 9.54E-20    | 0.015013107 | 7.16E-20    | 0           | 0.012351853 |
| 0.059228527     | 0.001825734 | 0.231385209 | 0           | 0.246559078 | 0.113383673 | 1.74E-18    |             |
| 0.054610536     | 0.000695316 | 0.055305852 |             |             |             |             |             |
| TCGA-BR-A4QM-01 | 0.213943739 | 0           | 0.019623672 | 0.393638944 | 7.13E-19    | 0.008002667 |             |
| 0.024984017     | 6.03E-18    | 0.014336547 | 0           | 0.026427888 | 0.092315696 | 0.13066006  |             |
| 0.010154121     | 0.02112948  | 0           | 0.118699268 | 0.013581731 | 1.23E-19    | 0.003423968 | 0           |
| 2.76E-18        | 0.532888434 | 6.4E-19     | 0           | 2.87E-18    | 0.006740069 | 0.056547978 | 6.76E-18    |
| 0.062263687     | 0.005149721 | 0.014636753 | 0.01781903  | 0.008872351 | 0.00136485  |             |             |
| 0.001743991     | 0           | 0.232962846 | 0.065364517 | 0.019332148 | 0           | 0           | 0.000546063 |
| 0.000681509     | 0           | 0.000785809 | 0           | 0           | 0.063144242 | 0           | 0.057860443 |
| 0.001351211     |             |             |             |             |             |             |             |
| 0.037464317     | 4.35E-20    | 0           | 0.033466592 | 0.049109471 | 0           | 0.245514518 | 8.28E-18    |
| 0.131203053     | 0.057382794 | 0           | 0.336920141 | 0           | 0.336920141 |             |             |
| TCGA-CD-5798-01 | 0.306582744 | 0.008523366 | 0.082583612 | 0           | 0           | 0           | 3.74E-20    |
| 0               | 2.45E-18    | 0           | 0.000808042 | 1.43E-19    | 0           | 0           | 0.222897637 |
| 0.101423792     | 0.012589743 |             |             |             |             |             |             |
| 0.000786337     | 0           | 0.052417309 | 0.079385294 | 0.003115089 | 0.610863057 | 4.49E-19    |             |
| 0.31052174      | 6.01E-19    | 0           | 0.175337242 | 0.392468495 | 0.122212079 | 0.056539279 |             |
| 0.04278366      | 0.057392242 | 0.00757742  | 1.34E-19    | 0.010809934 | 0.003511953 | 7.7E-18     |             |
| 0.063306486     | 0.067684501 | 0.065553707 | 7.27E-18    | 0.189438195 | 0.054844484 |             |             |
| 0.003428146     | 3.6E-18     | 0.00490893  | 9.07E-19    | 6.89E-18    | 0.131708684 | 0           | 0.01901194  |
| 0.199427043     | 0           | 0           | 0           | 0.064474912 | 2.26E-19    | 0.350672657 | 6.7E-18     |
| 0.043122011     | 0.090039967 | 1.27E-17    | 0.109246509 | 0.1992152   | 0.308461709 |             |             |
| TCGA-CD-5799-01 | 0.031090141 | 0.012558296 | 0.054698458 | 0           | 0.025529313 | 0           | 0           |
| 0               | 9.14E-19    | 0.006553518 | 0           | 4.95E-19    | 1.96E-18    | 0.01252669  | 0.042205347 |
| 0.001187786     | 0.002093332 | 2.89E-18    | 0           | 0.027177098 | 1.08E-19    | 0.598385404 | 0           |
| 0.013733021     | 1.41E-18    | 0.007085194 | 0.0538459   | 0.216833394 | 0.049575014 |             |             |
| 0.020519763     | 0.022553735 | 0.020540371 | 0.040873795 | 1.2E-19     | 0.0022236   |             |             |
| 0.000600485     | 0.006618368 | 0.120094556 | 0.028926705 | 0           | 0           | 0.086302943 |             |
| 0.024332903     | 0.0000199   | 0           | 0.001351736 | 0.002273074 | 0           | 0.048502823 |             |
| 3.25E-19        | 0.005464487 | 0.073647586 | 0.019409252 | 5.85E-19    | 3.69E-19    | 0.00582829  |             |
| 0.027836995     | 0           | 0.229314597 | 9.51E-19    | 0.1334322   | 0.090146248 | 0           | 0.016551206 |
| 0.026734208     | 0.043285413 |             |             |             |             |             |             |
| TCGA-CD-5800-01 | 0.058140664 | 0.004261266 | 0.083393258 | 0.038667509 | 0.093823388 | 0           |             |
| 0               | 3.29E-18    | 3.55E-18    | 0           | 0.00122864  | 3.85E-19    | 1.33E-18    | 0           |
| 0.015372022     |             |             |             |             |             |             |             |
| 0.01048174      | 2.96E-19    | 3.37E-18    | 0.002249966 | 0.007263648 | 0           | 0.573353006 | 0           |
| 0.000848981     | 0           | 0.014444512 | 0.050350421 | 0.113725892 | 0.06449424  | 0.009464529 |             |
| 0.009051411     | 0.016270485 | 0.020109229 | 0           | 8.25E-21    | 0.00906642  | 0.018581374 |             |
| 0.124174404     | 0.0388631   | 0           | 1.07E-18    | 0.117264082 | 0.017648429 | 0           | 0.00591369  |
| 0.003310804     | 0.00290772  | 1.52E-17    | 0.103602701 | 0.013082196 | 0           | 0.052866054 |             |
| 0.021203474     | 1.02E-17    | 2.32E-17    | 0.019490238 | 0.033279034 | 1.61E-19    | 0.059049063 | 0           |
| 0.221680064     | 0.038821127 | 1.95E-18    | 0.035251071 | 0.006186947 | 0.041438018 |             |             |
| TCGA-CD-5801-01 | 0.349797495 | 0.00753435  | 0           | 0.133062638 | 0.130557353 | 0.010068156 |             |
| 0.04352563      | 0           | 0           | 0.022139926 | 0.007458064 | 0.203241004 | 0.297174219 |             |

|                 |             |             |             |             |             |             |
|-----------------|-------------|-------------|-------------|-------------|-------------|-------------|
| 0.080612397     | 0.098604844 | 0.011110327 | 0.042974399 | 0.001688375 | 0           | 0.022617617 |
| 0               | 0.002504341 | 0.585388852 | 0           | 0.061584571 | 6.77E-21    | 1.49E-19    |
| 0.045160602     | 0.196166376 | 0.071781773 | 0.00682151  | 0.053240214 | 0.043174361 | 0.021949664 |
| 0.004165794     | 0           | 0.003277048 | 0.043828616 | 0.066904289 | 0           | 4.08E-19    |
| 1.72E-18        | 0.154738325 | 0.008250722 | 6.67E-20    | 0           | 0.00093457  | 0           |
| 0.093178471     | 1.15E-17    | 0.069915918 | 0.092721258 | 0.022605839 | 5.14E-19    | 3.69E-19    |
| 0.012155683     | 0.050515061 | 3.13E-18    | 0.121914318 | 2.11E-18    | 0.257229579 | 0.211521912 |
| 0.005447208     | 0.279221072 | 0.034559461 | 0.313780532 |             |             |             |
| TCGA-CD-5803-01 | 0.572409787 | 0.005687255 | 0.090877279 | 0.280443703 | 0.008447332 |             |
| 0.011525648     | 0.125216052 | 0           | 1.37E-19    | 0           | 0.002500708 | 0.200778631 |
| 0.26922853      | 0.030108472 | 0.177530509 | 0.107437774 | 0.093620826 | 0           | 3.28E-18    |
| 0.08250546      | 0.161662446 | 0.005974151 | 0.420010854 | 2.18E-19    | 0.316309627 | 7.92E-18    |
| 0.001705153     | 0.36784678  | 0.541742357 | 0.027609828 | 0.095130932 | 0.047870891 | 0.060711928 |
| 0.007972061     | 6.59E-19    | 0.013587486 | 0.005856185 | 0.115992189 | 0.045524171 |             |
| 0.031515291     | 0.032973687 | 9.36E-19    | 0.048867438 | 0.091583081 | 1.96E-18    | 0.04053104  |
| 0.002043981     | 0           | 0           | 0.0615295   | 0           | 0.050164998 | 0.210556851 |
| 0.002298846     | 4.59E-18    | 0           | 0           | 0.015710714 | 0           | 0.279636587 |
| 5.94E-20        | 0.111625435 | 0.049638067 | 1.95E-18    | 0.433697682 | 0.241829664 | 0.675527345 |
| TCGA-CD-5804-01 | 0.227493247 | 0.010062118 | 0.123192456 | 0.013749835 | 0.06307599  | 0           |
| 0.003457075     | 0           | 0.008553112 | 3.26E-18    | 0.002735548 | 0.001370228 | 1.06E-20    |
| 4.09E-19        | 0.005996249 | 0.087072737 | 0.017054118 | 0           | 3.48E-19    | 0.000683373 |
| 0.107188693     | 3.91E-18    | 0.589153467 | 1.59E-18    | 0.104889027 | 0           | 0.012507013 |
| 0.149284223     | 1.13E-18    | 0.043449973 | 0.081962618 | 0.060785008 | 0.065643429 |             |
| 0.033032878     | 0           | 0.006790232 | 0.005790236 | 0.002581691 | 0.074501842 | 0.032563726 |
| 0.065931451     | 0           | 0.083862196 | 0.071987968 | 2.78E-19    | 8.06E-19    | 0.002908687 |
| 0.006005143     | 1.49E-18    | 0.091832551 | 0           | 0.015009191 | 0.147796549 | 0.003471357 |
| 0               | 1.2E-19     | 3.38E-18    | 0.038371151 | 2.95E-19    | 0.124615292 | 0           |
| 0.149959185     | 0.005668    | 0           | 0.099016692 | 0.111069919 | 0.210086611 |             |
| TCGA-CD-5813-01 | 0.340049131 | 0.02979699  | 0.129472917 | 0.174434494 | 0.105700512 |             |
| 6.98E-19        | 0.042073485 | 2.73E-18    | 2.6E-19     | 9.35E-19    | 0           | 0.069636183 |
| 0.093157392     | 5.27E-18    | 0.269091339 | 0.141760514 | 0.045587242 | 0           | 0           |
| 0.049277428     | 0.261580413 | 0.012295319 | 0.384853907 | 8.43E-19    | 0.300585446 | 0           |
| 0.005750095     | 0.41497309  | 0.618762944 | 0.022468136 | 0.167044652 | 0.059775913 | 0.042529397 |
| 0.074972631     | 0.000601605 | 0.005749493 | 0.011937631 | 0.100505019 | 0.073744454 | 0.038724981 |
| 0.045286086     | 1.28E-18    | 0.148461737 | 0.153416001 | 0           | 0.019483259 | 0.002674711 |
| 3.63E-21        | 0           | 0.122002629 | 0           | 0.003206365 | 0.200528334 | 0.016264436 |
| 6.72E-18        | 0.052449824 | 9.73E-19    | 0.014492048 | 0.002769624 | 0.141243075 | 8.3E-18     |
| 0.123948213     | 0.014710862 | 0           | 0.274204685 | 0.295981425 | 0.57018611  |             |
| TCGA-CD-8524-01 | 0.270348198 | 0.0000973   | 0.041174806 | 0.027025516 | 6.9E-18     | 0           |
| 0.025458674     | 9.08E-20    | 0           | 0.016569988 | 0.001509528 | 0.044507497 | 0.034598221 |
| 0               | 0.012385996 | 0.109316024 | 0.003604371 | 0.007163901 | 0           | 0.003626939 |
| 0.05504668      | 0           | 0.646144156 | 0           | 0.137086533 | 1.28E-20    | 0           |
| 0.155663584     | 1.2E-18     | 0.060565688 | 0.036618982 | 0.013931629 | 0.032930195 | 0.01101204  |
| 0               | 0.000848329 | 0.009171279 | 0.005480135 | 0.038322543 | 0.053713905 | 2.91E-18    |
| 0               | 0.047976354 | 0.031277368 | 0           |             |             |             |

|                 |             |             |             |             |             |             |             |             |
|-----------------|-------------|-------------|-------------|-------------|-------------|-------------|-------------|-------------|
|                 | 0.002381828 | 0.00232515  | 0           | 0           | 0.069581387 | 5.61E-18    | 0.000723806 | 0.098692472 |
|                 | 0.011348123 | 0           | 7.98E-20    | 0           | 0.026262043 | 0           | 0.27580668  | 0.066919123 |
|                 | 0.031783193 | 0           | 0.059394388 | 0.096115233 | 0.155509621 |             |             |             |
| TCGA-CD-8525-01 | 0.223054598 | 0.015283959 | 0.090183595 | 0.168995578 | 0.120244759 |             |             |             |
|                 | 1.19E-18    | 1.09E-18    | 0           | 1.16E-19    | 0           | 0.022346804 | 0.040243619 | 0.059576764 |
|                 | 1.1E-18     | 0.002869316 | 0.046125459 | 0.026138153 | 0.008335857 | 1.63E-18    | 0.00682084  |             |
|                 | 0.045193277 | 0           | 0.572738845 | 1.76E-18    | 0.008595722 | 0           | 0.010722983 | 0.051484235 |
|                 | 0.074943486 | 0.069125504 | 0.032473753 | 0.03353616  | 0.058936902 | 0.003091518 |             |             |
|                 | 0.004904309 | 0           | 0.007312092 | 0.056659717 | 0.09139344  | 0.070663682 | 0.022871797 |             |
|                 | 0           | 0.044505162 | 0.032327474 | 0           | 0.013277027 | 0.003708697 | 4.06E-20    | 0           |
|                 | 0.017419271 | 0           | 0.107613676 | 0.04340362  | 0.044485513 | 0           | 0           | 0.040651179 |
|                 | 0.04286361  | 0.004493313 | 0.24849617  | 0           | 0.326518747 | 0.012411866 | 0           |             |
|                 | 0.184914868 | 0.034536479 | 0.219451347 |             |             |             |             |             |
| TCGA-CD-8526-01 | 0.202774865 | 0.005567517 | 0.096673729 | 0.081270015 | 0.117751594 |             |             |             |
|                 | 0.000280303 | 0           | 3.17E-18    | 3.29E-18    | 4.2E-18     | 0.006194884 | 1.17E-20    | 0.002160492 |
|                 | 0           | 0.023872072 | 0.013932139 | 0.002802608 | 4.48E-20    | 2.84E-19    | 0.007915584 | 0.058959972 |
|                 | 8.9E-19     | 0.418158978 | 1.48E-18    | 0.045674585 | 9.74E-19    | 0.002085044 | 0.075448168 |             |
|                 | 0.030236965 | 0.018229967 | 0.028716402 | 0.002641519 | 0.014853246 | 0.002840529 |             |             |
|                 | 0.005196612 | 0           | 0.000448616 | 0.023316442 | 0.106107382 | 0.050979297 | 6.95E-18    |             |
|                 | 1.05E-17    | 0           | 0.050146494 | 0.002879455 | 0.025032194 | 0.002619505 | 2.03E-18    |             |
|                 | 8.23E-18    | 0.053648781 | 0           | 0.000385227 | 0.098048168 | 0.021510971 | 2.43E-18    |             |
|                 | 1.53E-19    | 0.006688172 | 0.015611744 | 6.27E-19    | 0.246638521 | 0           | 0.210841782 |             |
|                 | 0.153909672 | 0           | 0.064682487 | 0.055101036 | 0.119783524 |             |             |             |
| TCGA-CD-8527-01 | 0.096828897 | 0.000129847 | 0.002320208 | 0.017420459 | 0.046069541 | 0           |             |             |
|                 | 0           | 1.87E-18    | 0           | 0           | 0.021681173 | 0.020117767 | 0.019705457 | 0           |
|                 | 1.32E-18    | 0.026703457 | 0.008528457 | 0.009713829 | 0           | 2.38E-19    | 1.92E-19    | 0           |
|                 | 0.558237292 | 0           | 0.020929718 | 0           | 0.007354147 | 0.030354664 | 1.31E-18    | 0.055086873 |
|                 | 0.000782684 | 0.016222897 | 0.030211893 | 0.013169705 | 0.010867443 | 0           | 0.005067848 | 0.000889605 |
|                 | 0.104452795 | 0.036198638 | 3.93E-18    | 3.6E-18     | 0.041845648 | 9.36E-20    | 0.004889466 |             |
|                 | 0.001963133 | 0.002863734 | 0           | 0           | 0.080121566 | 2.34E-18    | 0.032182254 | 0.033997561 |
|                 | 0.011350724 | 0           | 6.22E-20    | 0.004973158 | 0.043701306 | 7.34E-20    | 0.299068324 |             |
|                 | 1.03E-18    | 0.173615939 | 0.062954772 | 6.12E-18    | 0.04308571  | 0.010529783 | 0.053615493 |             |
| TCGA-CD-8528-01 | 0.118187848 | 0           | 1.64E-18    | 0.019990211 | 0.072412618 | 0.011899831 | 0           |             |
|                 | 3.06E-18    | 0           | 1.67E-18    | 0           | 1.45E-19    | 0.010405633 | 0           | 0.032699712 |
|                 | 3.6E-19     | 0.003280436 | 0.015771511 | 0           | 0.005545169 | 0.000776293 | 2.11E-18    | 0.59894596  |
|                 | 0           | 0.056859909 | 2.06E-19    | 0.004801412 | 0.003046499 | 0.025444062 | 0.070425452 |             |
|                 | 0.002429384 | 0.02920657  | 0.021169948 | 0.038893377 | 0.008352853 | 0.001177543 |             |             |
|                 | 0.00300853  | 0.0217601   | 0.100306726 | 0.026436093 | 0.004835088 | 0           | 0.107391569 |             |
|                 | 0.002518981 | 0.001589031 | 0           | 0           | 0.008974021 | 2.56E-18    | 0.013293911 | 0           |
|                 | 0.013377253 | 0.08314723  | 0.000534885 | 0           | 0.054647662 | 0.028291625 | 0.041433211 |             |
|                 | 0.002031227 | 0.279318664 | 2.54E-18    | 0.061378242 | 0.214867693 | 4.18E-18    | 0.051269274 |             |
|                 | 0.028818101 | 0.080087375 |             |             |             |             |             |             |
| TCGA-CD-8529-01 | 0.344112758 | 1.29E-21    | 0.108666197 | 0.269183932 | 0.027352915 |             |             |             |
|                 | 0.001088818 | 0.062134455 | 0           | 0.008336867 | 1.78E-18    | 0           | 0.021206307 | 0.054216967 |

|                 |             |             |             |             |             |             |             |
|-----------------|-------------|-------------|-------------|-------------|-------------|-------------|-------------|
|                 | 6.67E-19    | 0.089622293 | 0.038933928 | 0.076310616 | 0.001761245 | 0           | 0.02609467  |
|                 | 0.128599939 | 0.012539946 | 0.502744634 | 2.51E-20    | 0.101899265 | 0.000157541 |             |
|                 | 0.008403686 | 0.179967826 | 0.149559319 | 0.070193265 | 0.073673447 | 0.100756374 |             |
|                 | 0.084092299 | 0.064367204 | 0.003396842 | 0.004727892 | 0.008350312 | 0.099872074 |             |
|                 | 0.030653547 | 0.040847427 | 0.029990983 | 0           | 0.017985449 | 0.073112563 | 0           |
|                 | 0.029377699 | 0.00049622  | 3.34E-19    | 0           | 0.058883035 | 0           | 0.044298816 |
|                 | 0.042435591 | 0           | 0.014292905 | 1.7E-19     | 0.040823989 | 0.00253618  | 0.197028865 |
|                 | 0.035318493 | 0.015441286 | 7.7E-18     | 0.308779369 | 0.115249602 | 0.424028971 |             |
| TCGA-CD-8530-01 | 0.173991775 | 9.84E-19    | 0.034485904 | 2.61E-18    | 5.72E-19    | 0           | 1.18E-18    |
|                 | 2.06E-18    | 0           | 1.05E-18    | 0.006225647 | 8.25E-19    | 2.16E-19    | 0           |
|                 | 0.08933202  | 0.156993854 | 0           | 0.01807806  | 0.005714955 | 0.009445035 | 0.254022833 |
|                 | 3.2E-19     | 0.40986677  | 0           | 0.256747307 | 0.009387312 | 0.000530254 | 0.439857174 |
|                 | 0.095155171 | 0.02763206  | 0.135708305 | 0.016068876 | 0.023834362 | 0.014878621 | 0.001656391 |
|                 | 0.008894737 | 5.37E-19    | 0           | 0.078920709 | 0.02928486  | 0           | 1.3E-17     |
|                 | 0           | 0.123174824 | 0.006467419 | 3.66E-18    | 0.001618677 | 0           | 8.4E-18     |
|                 | 0.025123045 | 3.58E-18    | 0           | 0.18821977  | 0           | 6.81E-18    | 0.002131815 |
|                 | 0           | 0.037555477 | 0           | 0.414514981 | 9.84E-19    | 0.050905387 | 0.035288675 |
|                 | 0           | 0.018113535 | 0.25538507  | 0.273498605 |             |             |             |
| TCGA-CD-8531-01 | 0.400459052 | 0           | 6.2E-21     | 0.977568172 | 0           | 0.036454944 | 1.83E-19    |
|                 | 0           | 6.15E-18    | 0.012519367 | 2.64E-20    | 0.024894007 | 2.69E-18    | 0.166858119 |
|                 | 1.72E-18    | 0.237991513 | 0.131290121 | 0           | 0.056069247 | 0.03807226  | 0           |
|                 | 0.005394158 | 0           | 0.009917435 | 1.51E-17    | 0           | 3.08E-18    | 0.589785187 |
|                 | 0           | 0.020032083 | 0.065747465 | 0.034351546 | 0.035925363 | 0.050966923 | 3.44E-20    |
|                 | 0.004773702 | 0.291461613 | 0.089676715 | 1.78E-17    | 0.039250801 | 0.087705063 | 0.236659095 |
|                 | 0.049658    | 0.013605385 | 0.101404587 | 0.001879377 | 1.65E-18    | 0           | 0.14763188  |
|                 | 0           | 0.021598189 | 0.185926732 | 0.119863219 | 0           | 0           | 0.196848896 |
|                 | 0           | 0.020761347 | 0.136282196 | 0.007717893 | 0.253021101 | 0.12875599  | 1.01E-17    |
|                 | 0.793068405 | 0.023994848 | 0.817063253 |             |             |             |             |
| TCGA-CD-8532-01 | 0.26288679  | 0           | 1.27E-19    | 0.207691783 | 0.048428432 | 0.03233599  |             |
|                 | 0.074971365 | 0.013951962 | 0.008112593 | 0.020553905 | 0.007397521 | 0.063672403 |             |
|                 | 0.150809638 | 0.007554791 | 0.142332399 | 0.032845538 | 0.083667293 | 0.004324603 | 0           |
|                 | 0.021466759 | 0.015387287 | 0.012994753 | 0.607306527 | 0           | 0.038374433 | 4.28E-20    |
|                 | 0.010616892 | 0.093102478 | 0.1003929   | 0.064086865 | 0.009451224 | 0.035062999 |             |
|                 | 0.029162552 | 0.036023769 | 0.002803848 | 0.004646722 | 0.003087331 | 0.090782898 |             |
|                 | 0.06744585  | 0.04284475  | 0.007674336 | 1.71E-20    | 0           | 0.011687411 | 0           |
|                 | 1.35E-19    | 0.001745146 | 0           | 9.92E-19    | 0.035296607 | 2.72E-18    | 0.103507831 |
|                 | 0.040189815 | 0.037409136 | 0.001314938 | 0           | 0           | 0.028267578 | 7.58E-19    |
|                 | 0.280167994 | 0.009028174 | 0.049139838 | 0.071094474 | 3.65E-18    | 0.243545895 | 0.02688086  |
|                 | 0.270426755 |             |             |             |             |             |             |
| TCGA-CD-8533-01 | 1.53E-18    | 0           | 1.13E-17    | 0           | 0.058489129 | 3.57E-19    | 5.25E-19    |
|                 | 4.95E-18    | 0           | 8.55E-18    | 0           | 0.017236443 | 2.36E-18    | 0           |
|                 | 0.003675469 | 0.071442696 | 0.012632399 | 0.005076672 | 6.92E-18    | 0.004475631 | 0           |
|                 | 0.006169455 | 0.339693154 | 8.26E-19    | 0.084948797 | 1.73E-18    | 0.010436903 | 0.010181657 |
|                 | 0.163546293 | 0.022992021 | 5.44E-20    | 6.74E-19    | 0           | 0.00146264  | 0.000328065 |
|                 | 0           | 8.4E-19     | 0           | 0.076826597 | 0.051981106 | 1.25E-18    | 3.97E-18    |
|                 | 0           | 7.86E-19    | 0.000617814 | 1.24E-18    | 0.05110032  | 6.89E-19    | 0           |
|                 | 0.005216594 | 0.048926488 | 0.042803658 | 0.179343775 | 0.004247473 | 8.97E-19    | 0           |
|                 | 0.007859112 | 0.010025913 | 3.63E-18    | 0.252438108 | 0.009595678 |             |             |

|                 |             |             |             |             |             |             |             |
|-----------------|-------------|-------------|-------------|-------------|-------------|-------------|-------------|
|                 | 0.111355774 | 0.011427846 | 7.11E-18    | 0.018806396 | 0.042474398 | 0.061280794 |             |
| TCGA-CD-8534-01 | 0.254272014 | 9.32E-19    | 0           | 0.077164554 | 0           | 1.11E-21    | 0.003730053 |
|                 | 1.11E-19    | 0.002398298 | 0           | 0.004138455 | 0.017834609 | 0.023990839 | 6.85E-20    |
|                 | 0.046702731 | 0.030021711 | 0.02480558  | 0.006296151 | 0.008496669 | 0.018222612 |             |
|                 | 0.049802417 | 0.00931082  | 0.465386581 | 0           | 0.099270976 | 2E-20       | 0.005321254 |
|                 | 0.147303041 | 0.111482129 | 0.03414287  | 0.036105447 | 0.007537514 | 0.013006995 |             |
|                 | 0.013307691 | 0.004191935 | 0.003309702 | 6.77E-18    | 0.018728012 | 0.058399012 |             |
|                 | 0.017680061 | 0.003715173 | 1.27E-18    | 0           | 0.02268788  | 2.14E-20    | 0.009122148 |
|                 | 0.002994332 | 0.002520526 | 0           | 0           | 0           | 0.001428878 | 0.015506033 |
|                 | 0.001065014 | 4.24E-18    | 9.05E-19    | 0.016540743 | 1.3E-18     | 0.417704538 | 0           |
|                 | 0.037946567 | 0           | 0.093665162 | 0.074536696 | 0.168201858 |             | 0.062879639 |
| TCGA-CD-8535-01 | 0.042576924 | 0           | 0           | 0.002118543 | 0.072105376 | 0.007203985 |             |
|                 | 7.34E-19    | 5.12E-19    | 2.9E-18     | 6.09E-18    | 4.55E-20    | 4.11E-20    | 0           |
|                 | 1.78E-17    | 0.025688097 |             |             |             |             |             |
|                 | 0.033097971 | 0.010075714 | 0.034151823 | 1.76E-18    | 2.57E-19    | 0.013982517 | 4.02E-19    |
|                 | 0.405498119 | 0           | 0.000337003 | 0           | 0.001563574 | 0.008815211 | 0.074469168 |
|                 | 0.046242628 | 0.002913752 | 2.24E-19    | 0.011040224 | 0           | 0           | 0           |
|                 | 2.62E-19    | 0.001422967 |             |             |             |             |             |
|                 | 0.079105372 | 0.022793065 | 2.14E-18    | 1.76E-18    | 0           | 0.002576828 | 0.002014724 |
|                 | 0.000982167 | 0.004868507 | 0           | 0           | 0.01272726  | 0.086304013 | 0           |
|                 | 0.109780824 |             |             |             |             |             |             |
|                 | 0.011188945 | 0           | 0           | 0.016316276 | 0.014322013 | 5.42E-18    | 0.422842802 |
|                 | 8.09E-18    |             |             |             |             |             |             |
|                 | 0.115499619 | 0.161711543 | 0           | 0.001412362 | 0.00715976  | 0.008572122 |             |
| TCGA-CD-8536-01 | 0.24213134  | 0.006460878 | 0.023330626 | 0.050989072 | 0.141658133 |             |             |
|                 | 0.023432548 | 6.1E-18     | 0           | 9.17E-18    | 1.65E-18    | 0.013100063 | 0.006639537 |
|                 | 0.063315002 |             |             |             |             |             |             |
|                 | 1.38E-19    | 0.035723227 | 0           | 0.027414971 | 0.006717315 | 2.03E-19    | 0.019426416 |
|                 | 1.35E-18    | 0           | 0.658326509 | 9.9E-19     | 0.09821341  | 7.08E-19    | 3.58E-20    |
|                 | 0.015673523 |             |             |             |             |             |             |
|                 | 0.23587092  | 0.103750928 | 0.000875694 | 0.019896842 | 0.022424704 | 0.006879084 |             |
|                 | 0.00237948  | 6.92E-19    | 1.33E-19    | 0.027320005 | 0.108130904 | 0.028966139 | 0.009539274 |
|                 | 0           | 0.12572881  | 0           | 0           | 0           | 0.000300127 | 1.72E-19    |
|                 | 0           | 0.027115846 | 5.08E-18    |             |             |             |             |
|                 | 0.047709233 | 0.005470932 | 0.027214689 | 0           | 2.94E-19    | 0.012123672 | 0.066758612 |
|                 | 4.11E-19    | 0.327671846 | 0           | 0.139195391 | 0.270506628 | 0           | 0.072580414 |
|                 | 0.052337144 |             |             |             |             |             |             |
|                 | 0.124917558 |             |             |             |             |             |             |
| TCGA-CD-A486-01 | 0.121031975 | 0.028824681 | 0.067660121 | 0.03801492  | 0.082898295 |             |             |
|                 | 6.33E-20    | 0           | 0           | 0           | 0           | 0.002713895 | 5.02E-19    |
|                 | 7.62E-19    | 0           | 0           | 0.025185672 |             |             |             |
|                 | 0.027403668 | 0.022112284 | 6.76E-18    | 0.004687333 | 0.003035304 | 0.013738997 |             |
|                 | 0.474435159 | 4.27E-19    | 0.007958295 | 9.09E-19    | 0.008971545 | 0.02855366  | 0.081134971 |
|                 | 0.038682365 | 0.00792002  | 0.076148445 | 0.073512945 | 0.030827221 | 0           | 0           |
|                 | 0.012010055 | 3.35E-19    | 0.032846711 | 2.72E-19    | 0.030773508 | 0           | 0.241001309 |
|                 | 0.004380396 | 0           | 0           | 0.003060414 | 0.01104     |             |             |

|                 |             |             |             |             |             |             |             |             |
|-----------------|-------------|-------------|-------------|-------------|-------------|-------------|-------------|-------------|
|                 | 0.017627717 | 0.010443627 | 0.017914837 | 0           | 0           | 0.012029548 | 0           | 0.036599475 |
|                 | 0.016150879 | 0.088182576 | 0           | 4.53E-18    | 6.93E-18    | 0.008714639 | 0.010410659 |             |
|                 | 0.004031744 | 0.017803184 | 0           | 0           | 0.128750972 | 0           | 0           | 0.069188712 |
|                 | 0.004272767 | 4.74E-18    | 2.14E-17    | 0.027019605 | 4.08E-18    | 0.569488138 | 2.51E-18    |             |
|                 | 0.009889305 | 0.062630912 | 0           | 0.117635047 | 0.133126003 | 0.25076105  |             |             |
| TCGA-CD-A48A-01 | 0.067151227 | 0.003376899 | 0.008754678 | 0.03150351  | 0.002276306 | 0           |             |             |
|                 | 1.51E-18    | 0           | 0.017988352 | 1.08E-18    | 0.019900539 | 0.002563888 | 0           | 0           |
|                 | 0.022887621 | 0.029056013 | 0.004467139 | 0           | 0.002138493 | 0           | 0.00115027  |             |
|                 | 0.490888777 | 7.85E-20    | 0.026668305 | 0           | 0.000904952 | 0.062446315 | 0.211557728 |             |
|                 | 0.04226101  | 0.004561936 | 0.058882531 | 0.035382646 | 0.045132834 | 0           | 0.001889398 |             |
|                 | 3.96E-23    | 1.74E-19    | 0.08469909  | 0.022212585 | 1.1E-19     | 7E-18       | 0           | 0.000600235 |
|                 | 0.002111646 | 0           | 0.005185783 | 0           | 0           | 0.073639621 | 0           | 0.000292298 |
|                 | 0.008859166 | 0           | 2.22E-21    | 0.007596732 | 0.015850502 | 1.73E-18    | 0.31252715  |             |
|                 | 2.11E-18    | 0.128237675 | 0.035060393 | 3.94E-19    | 0.064159128 | 0.015022602 | 0.079181731 |             |
| TCGA-CD-A48C-01 | 0.143990015 | 0.007314113 | 0.05169828  | 0.029267797 | 0.013088024 |             |             |             |
|                 | 0.005102274 | 0           | 3.68E-18    | 4.92E-18    | 0           | 0.017946392 | 0.024038048 | 0.019458711 |
|                 | 9.12E-19    | 0.023166725 | 0.026169101 | 0.012035137 | 0.018490611 | 0           | 0.007478436 |             |
|                 | 1.05E-18    | 0           | 0.617759678 | 0           | 0.056129403 | 1.12E-18    | 0.001775266 | 0.029423611 |
|                 | 0.090802705 | 0.066492419 | 0.004120705 | 0.033002989 | 0.035178482 | 0.007084842 |             |             |
|                 | 0.006702152 | 0.003225851 | 0           | 0.01640251  | 0.076224506 | 0.044599691 | 6.46E-20    | 0           |
|                 | 7.08E-18    | 7.38E-19    | 8.01E-19    | 0           | 0.000925397 | 0           | 6.98E-18    | 0.042861422 |
|                 | 0.014914185 | 0.047974882 | 0.00582694  | 1.64E-20    | 2.1E-20     | 0.013550697 | 0.034789302 |             |
|                 | 3.05E-19    | 0.381994714 | 0           | 0.095790534 | 0.216367999 | 0           | 0.066992948 | 0.031721758 |
|                 | 0.098714706 |             |             |             |             |             |             |             |
| TCGA-CD-A4MG-01 | 0.237292141 | 0.000960387 | 0.099313393 | 0.13228023  | 0.006957384 |             |             |             |
|                 | 0.001955988 | 0           | 0           | 0.0005039   | 0           | 0.013962655 | 0.008983634 | 0.001804371 |
|                 | 0.032191663 | 0.018879062 | 0.01653209  | 0.019852404 | 6.83E-19    | 0.0164987   |             |             |
|                 | 0.038722152 | 0           | 0.471292728 | 0           | 0.071511874 | 0           | 0.001360536 | 0.058530983 |
|                 | 0.113419023 | 0.065354928 | 0.025149411 | 0.062061882 | 0.052507275 | 0.030563839 |             |             |
|                 | 0.003695143 | 0.001470424 | 0.000681009 | 0.057184492 | 0.08329441  | 0           | 0.024128874 |             |
|                 | 2.35E-18    | 0.104678436 | 0.031104739 | 1.82E-19    | 0.012817828 | 0.004476631 | 0           |             |
|                 | 9.34E-19    | 0.036891636 | 0           | 0.009593245 | 0.03802467  | 0.015190599 | 0.000754582 |             |
|                 | 4.07E-19    | 0.037720235 | 0.045719281 | 0.0012435   | 0.259868357 | 0           | 0.161638164 |             |
|                 | 0.100222392 | 3.13E-18    | 0.165098976 | 0.055597206 | 0.220696182 |             |             |             |
| TCGA-CD-A4MH-01 | 0.116200181 | 0           | 0.071199719 | 0.04746006  | 0.033363902 | 3.62E-20    | 0           |             |
|                 | 1.54E-18    | 0           | 5.45E-19    | 0.01885911  | 0.042650341 | 0.003871162 | 4.21E-18    | 0.01517586  |
|                 | 0.042999724 | 0.004791948 | 0.005940466 | 0.002197525 | 1.52E-21    | 0           | 0           | 0.417734591 |
|                 | 0.001311386 | 0.000763784 | 0.054051254 | 0.011559446 | 0.070456443 | 1.22E-17    |             |             |
|                 | 0.031018841 | 2.3E-19     | 0.000307217 | 0.018815758 | 0.000914343 | 0.005115732 | 0           |             |
|                 | 0.003716464 | 0.030116327 | 0.037689224 | 0.043996116 | 0.004268885 | 0           | 0           |             |
|                 | 8.57E-19    | 0           | 0           | 0.007968366 | 0.01119724  | 0           | 0.01328775  | 4.71E-18    |
|                 | 0.082879224 | 0.020220517 | 0           | 0           | 0.01232795  | 0.025098014 | 0           | 0.209510784 |
|                 | 0.061512236 | 0.123547201 | 1.29E-18    | 0.073999649 | 0.000381892 | 0.074381541 |             |             |
| TCGA-CD-A4MI-01 | 0.38971676  | 0.004998579 | 0.12585099  | 0.207224846 | 4.92E-19    |             |             |             |

|                 |             |             |             |             |             |             |
|-----------------|-------------|-------------|-------------|-------------|-------------|-------------|
| 0.01064133      | 0.038459696 | 4.99E-19    | 0           | 2.03E-18    | 0.024600765 | 0.143017745 |
| 0.144329208     | 0.051000931 | 0.043486855 | 0.067495821 | 0.08680753  | 0.010112452 | 0           |
| 0.02056791      | 0.026032282 | 0.001897843 | 0.340527858 | 0           | 0.223312238 | 0.003636281 |
| 3.15E-20        | 0.214286254 | 0.047358475 | 0.03351052  | 0.022509161 | 0.128932907 |             |
| 0.12396234      | 0.019972559 | 0.012524374 | 0.005645922 | 0.0071102   | 0.070451508 |             |
| 0.037068941     | 0.045665987 | 0.023079054 | 1.35E-19    | 0.016512654 | 0.010686349 |             |
| 1.88E-18        | 0.00892107  | 0.006454148 | 3.82E-19    | 0           | 0.039300413 | 0           |
| 0.094684732     | 0.028300381 | 0           | 1.18E-18    | 0           | 0.016509542 | 0.00234312  |
| 1.49E-18        | 0.08775458  | 0.145587193 | 2.93E-18    | 0.358163119 | 0.12717155  | 0.485334669 |
| TCGA-CD-A4MJ-01 | 0.054911302 | 0.004321894 | 0.022836129 | 0.01176517  | 0.015189546 |             |
| 0.009538721     | 2.39E-19    | 0           | 0.0000518   | 3.94E-19    | 0.007486571 | 0           |
| 3.79E-19        | 0.03071408  | 0.018488637 | 0.012876742 | 0.016935102 | 8.19E-20    | 0.001874947 |
| 0               | 0.002211185 | 0.679575637 | 5.71E-19    | 0.036071645 | 0           | 3.9E-19     |
| 0.13508304      | 0.138479057 | 0.002356758 | 0.004816855 | 0.011785719 | 0.000925651 |             |
| 0.003655633     | 0.000682562 | 0           | 0.000655009 | 0.069071407 | 0.00875956  | 0           |
| 2.65E-19        | 0.1447753   | 0.002762817 | 0           | 0.002917048 | 0.0000551   | 3.8E-19     |
| 2.94E-19        | 0.05673897  | 0           | 0.013249532 | 0.067753814 | 0.004273085 | 0.004993735 |
| 3.88E-19        | 0.005369319 | 0.071900303 | 3.91E-19    | 0.178407523 | 0.004144504 | 0.138927257 |
| 0.08195716      | 0.00073483  | 0.01621586  | 0.02019677  | 0.036412629 |             |             |
| TCGA-CG-4301-01 | 0.237257039 | 0           | 0.022877649 | 0.046204959 | 0           | 0.019163637 |
| 0.006620211     | 1.01E-19    | 2.61E-19    | 0           | 0.01428447  | 0.030170215 | 0.013116961 |
| 3.77E-18        | 0.079280522 | 0.005469345 | 0.004404072 | 0.01744423  | 0           | 0.02275898  |
| 0.015156988     | 0.00107864  | 0.568773632 | 1.08E-20    | 0           | 0.049617516 | 0           |
| 0.132798359     | 0.05577182  | 0.005352656 | 0.050973898 | 0.026806695 | 0.035076393 |             |
| 0.013337486     | 0.002885539 | 0.010350219 | 1.82E-19    | 0.061028512 | 0.00512334  |             |
| 0.024417112     | 0           | 0.031637721 | 2.76E-20    | 0           | 0.007981524 | 0.002593551 |
| 2.89E-18        | 0           | 4.77E-19    | 0.00347059  | 5.17E-18    | 0           | 2.28E-19    |
| 0               | 0.507301996 | 0.00496113  | 0.003454546 | 0.04097329  | 0.015284126 | 0.126257582 |
| 0.007578494     | 0.133836076 |             |             |             |             |             |
| TCGA-CG-4304-01 | 0.177527924 | 1.7E-20     | 0.040662566 | 0.132975693 | 0.06265471  |             |
| 0.0143418       | 0.017949064 | 1.27E-20    | 0.007232621 | 1.83E-18    | 0.017248766 | 0.028819496 |
| 0.02345754      | 0           | 0.098011786 | 0.020575303 | 0.031749197 | 0.007522813 | 0           |
| 0.022343168     | 0.011875816 | 0           | 0.478377711 | 5.7E-23     | 0           | 0.050987205 |
| 0.079023679     | 0.28806128  | 0.048648465 | 0.011454061 | 0.030054909 | 0.032344666 |             |
| 0.030798626     | 0.011227766 | 0.010487943 | 0           | 0.047681285 | 0.025109515 | 0.007767429 |
| 0.046496168     | 9.72E-18    | 1.4E-18     | 0.006500498 | 3.38E-19    | 0.000497294 | 0           |
| 0               | 5.71E-20    | 8.95E-18    | 0.021016409 | 2.67E-18    | 0.039222819 | 0.006674049 |
| 1.36E-17        |             |             |             |             |             |             |
| 2E-18           | 0.05723322  | 0           | 0.332568367 | 0           | 0.025130976 | 0.054953299 |
| 0.015009741     |             |             |             |             |             |             |
| 0.207531046     | 0.005937908 | 0.213468954 |             |             |             |             |
| TCGA-CG-4305-01 | 0.285065253 | 0.002815546 | 0.021169954 | 0.098096982 | 0.113382331 |             |
| 0.024299483     | 0.030582237 | 3.56E-20    | 0           | 0           | 0.008613387 | 0.063029193 |
| 0.10414183      |             |             |             |             |             |             |
| 2.52E-18        | 0.093048997 | 0.023803866 | 0.031968525 | 0.012399832 | 0           | 0.033595426 |
| 2.66E-24        | 9.25E-19    | 0.574439333 | 3.6E-19     | 0.024641232 | 8.34E-19    | 0.005227744 |
| 0.12058201      | 0.330606389 | 0.088051844 | 0.000789576 | 0.082412837 | 0.055686397 |             |

|                 |             |             |             |             |             |             |                                  |
|-----------------|-------------|-------------|-------------|-------------|-------------|-------------|----------------------------------|
|                 | 0.043894359 | 0.008009402 | 0.000739709 | 0.001387912 | 0.023366859 | 0.071266732 |                                  |
|                 | 0.003304621 | 0.030267505 | 0           | 0.072216441 | 1.46E-19    | 2.66E-19    | 0.01313041 0                     |
|                 | 0.002891491 | 0           | 0.010305952 | 0           | 0.060405791 | 0.004246171 | 0.012623632                      |
|                 | 4.62E-20    | 0           | 6.68E-19    | 0.044414867 | 0.003184382 | 0.36154529  | 1.33E-17 0.033320316             |
|                 | 0.221927222 | 0           | 0.212201891 | 0.013728389 | 0.22593028  |             |                                  |
| TCGA-CG-4306-01 | 0.090887802 | 0           | 0           | 0.085440186 | 0.075327163 | 0.030001352 |                                  |
|                 | 1.66E-18    | 9.5E-19     | 4.52E-19    | 1.38E-18    | 0.016839668 | 0.002959283 | 0.024024436 7.4E-19              |
|                 | 0.122425603 | 0.002065351 | 0.041068048 | 0.023912766 | 2.6E-20     | 0.015591594 |                                  |
|                 | 0.001415367 | 2.24E-18    | 0.562398716 | 0.000765456 | 0           | 0.018801204 | 0.001937827                      |
|                 | 0.034295027 | 0.282732516 | 0.080025712 | 0.0000262   | 0.042354233 | 0.026265211 |                                  |
|                 | 0.019178493 | 0.012745155 | 0.000454018 | 0.002759047 | 0.014645941 | 0.071281712 |                                  |
|                 | 0.018754307 | 0.064965518 | 0           | 0.003136976 | 0           | 1.89E-19    | 0.003929056 0.00038924           |
|                 | 0.015100664 | 0           | 0.003908708 | 9.61E-18    | 0.03708325  | 4.09E-19    | 0.020350143                      |
|                 | 0.005589908 | 0.001277687 | 0.00542774  | 0.065860897 | 0.001796478 | 0.476575924 | 0                                |
|                 | 0.053683408 | 0.231770032 | 0           | 0.159437755 | 0.000707684 | 0.160145439 |                                  |
| TCGA-CG-4436-01 | 0.002067003 | 1.34E-18    | 1.05E-17    | 0.02735385  | 0.090295599 | 0.021629243 |                                  |
|                 | 7.47E-19    | 1.45E-18    | 1.33E-19    | 0           | 0.007076638 | 0           | 0.002282382 3.65E-18 0.129701896 |
|                 | 0           | 0.016167679 | 0.022296026 | 0           | 0.006327086 | 2.33E-20    | 1.07E-19 0.415282726             |
|                 | 1E-18       | 0           | 0           | 0.027576161 | 0.346502064 | 0.0456007   | 0.000211732                      |
|                 | 0.024783384 | 0.011142745 | 0.027066595 | 0.000929276 | 8.65E-20    | 0           | 0.00145265                       |
|                 | 0.090828958 | 0           | 0.046986115 | 7.75E-18    | 6.56E-18    | 2E-19       | 0 2.66E-20 0.000205075           |
|                 | 0.045534574 | 0           | 0.026063907 | 0           | 0.042509419 | 1.83E-17    | 0.009616879 0                    |
|                 | 1.13E-17    | 0.006114322 | 0.052787226 | 0           | 0.380588725 | 0.019641644 | 0.085948466                      |
|                 | 0.191849531 | 0           | 0.10127619  | 6.83E-19    | 0.10127619  |             |                                  |
| TCGA-CG-4437-01 | 0.306309052 | 0.004883743 | 0.01925412  | 0.156661488 | 0.101541461 | 0           |                                  |
|                 | 1.46E-20    | 1.1E-18     | 0           | 3.57E-18    | 4.69E-19    | 0.014177462 | 0.078623795 1.01E-19             |
|                 | 0.039481089 | 0.023251127 | 0.05738918  | 0.000662977 | 0           | 0.021710278 | 0.022325181                      |
|                 | 0.002100109 | 0.594992875 | 3.19E-19    | 0.064846868 | 1.18E-17    | 0.000650005 | 0.067279262                      |
|                 | 0.208362299 | 0.062392868 | 0.014450553 | 0.072099349 | 0.056410036 | 0.056247136 |                                  |
|                 | 0.00466528  | 0           | 0.001516351 | 0.035267912 | 0.095435693 | 0.018958066 | 0.032103066                      |
|                 | 1.18E-17    | 0.149506664 | 0.023939576 | 0           | 0.0034908   | 0           | 0.017124295 3.25E-18             |
|                 | 0.060234735 | 2.67E-18    | 0.053603423 | 0.105075245 | 0.02011931  | 0           | 2.64E-19                         |
|                 | 0.024699698 | 0.026337513 | 1.72E-18    | 0.171038624 | 0.004538478 | 0.251460606 |                                  |
|                 | 0.030548531 | 0           | 0.213760884 | 0.046027896 | 0.259788779 |             |                                  |
| TCGA-CG-4438-01 | 0.231450568 | 1.18E-19    | 0           | 0.066653559 | 0.157987737 | 0.038022981 | 0                                |
|                 | 1.05E-18    | 0           | 3.2E-18     | 0.009489471 | 0.034623216 | 0.060546091 | 0 0.050326128 0                  |
|                 | 0.012293732 | 0.022555193 | 0           | 0.011444502 | 0           | 0           | 0.516226968 5.41E-19 0           |
|                 | 4.04E-18    | 0.003880987 | 0.010478781 | 0.166393406 | 0.049484628 | 0           | 0.072765745                      |
|                 | 0.052913481 | 0.040105539 | 0.004013801 | 0           | 0           | 0.015067485 | 0.038595498                      |
|                 | 0.017898714 | 0.001090972 | 4.75E-18    | 0           | 4.82E-18    | 0           | 0.006937583 0.002014975          |
|                 | 2.45E-20    | 2.67E-18    | 2E-18       | 0           | 0.098492922 | 0.03473893  | 0.007423006 0                    |
|                 | 4.87E-18    | 0.01305121  | 0.028627414 | 7.09E-18    | 0.323559604 | 0           | 0.061405077                      |
|                 | 0.300306436 | 4.82E-19    | 0.127061197 | 5.92E-20    | 0.127061197 |             |                                  |
| TCGA-CG-4440-01 | 0.103255975 | 0           | 3.82E-19    | 0.019109011 | 0.11004418  | 0.009642782 | 0                                |

9.62E-20 6.47E-19 0 0.007371367 1.48E-18 0 1.73E-18 0.053380242 1.2E-17  
 0.007564828 0.02181067 2.86E-19 0 0.005245092 0 0.279664318 1.07E-19 0  
 2.51E-18 0.00818525 0.020827186 0.055846121 0.040421543 0.001838093  
 0.024897806 0.010881325 0.027832919 0.012470711 0 0 0.009219304  
 0.114466075 0.010560834 0.012161972 0 2.39E-17 0.004751815 0.003005293  
 0.002135834 0 0.015092527 2.34E-17 1.52E-20 0 0.001776503 0 0.003406685  
 0 2.24E-18 0.013145613 0.007836571 3.15E-18 0.358295915 3.73E-17 0.194493375  
 0.186950075 1.37E-17 0.055821351 0.002622546 0.058443897  
 TCGA-CG-4441-01 0.165788717 0.009521209 0.058713109 0.003112284 0.038079379  
 8.25E-20 5.19E-19 7.47E-19 5.86E-20 0.002703813 0 1.62E-19 0.008702411 2.6E-18  
 0.022662373 0 0.01182885 0 6.19E-19 0.004247288 0.030744409 0.001835403  
 0.530862656 1.83E-18 0.025665502 1.88E-19 0.003840299 0.134320589 0.046476625  
 0.055486344 0.018022957 0.023616969 0.019525137 0.040866498 4.98E-19  
 0.001178697 0.003239753 3.15E-18 0.043565017 0.034791654 0.011486079  
 1.42E-19 0.219031612 0.017506137 0 0 0.000656062 0.014268735 5.79E-18  
 0.028347209 0 0.002990239 0.165405677 0.026002675 1.99E-18 0 0  
 0.031300182 0 0.167160275 2.42E-18 0.102975204 0.052235709 1.4E-18  
 0.039044505 0.03296556 0.072010065  
 TCGA-CG-4442-01 0.120207035 0 0 0.018466008 0.103918392 0.024026248  
 2.31E-18 0 0 1.76E-18 0.013582052 0 0.006775111 0 0.053909231 0  
 0.013263281 0.02454194 0 0.000747886 3.67E-19 5.88E-18 0.59333254  
 3.64E-20 1.53E-17 5.78E-18 0 0.008609825 0.050111821 0.098730404 0  
 0.012690974 0.011378596 0.013681884 0.010201364 0 0 0.001018534  
 0.068342733 0.015794459 0.012776374 1.02E-18 1.48E-17 8.01E-19 0.00739712  
 0.006644588 0.000301208 0.007166021 9.53E-18 1.48E-17 0 0.02085291 0  
 0.018596902 2.39E-19 1.74E-17 0.007292993 0.037219947 3.87E-18 0.544553784  
 5.84E-19 0.033647096 0.317176498 0 0.041365752 7.86E-18 0.041365752  
 TCGA-CG-4443-01 0.065125291 0 2.91E-18 0 0.072487905 0.017493262 0 6.8E-20  
 0.033281916 0 0.002725878 0.003664772 0 3.26E-20 0.039778447 0.028551876  
 0.006571742 0 0 2.36E-19 0.062061334 0 0.372216713 4.85E-19 0  
 1.61E-17 0 0.093627939 0.096203002 0.05510832 0.029906193 0.018566263  
 0.011289096 0.020317388 0.004655588 0.000135285 0.023848757 0 0.056262146  
 0 0.000000373 0 0 0.042319781 0.009161903 0.000877987 0.006511438  
 4.72E-21 1.22E-18 5.22E-18 0.037737053 0 0.089061316 0.01326638 6.58E-20 0  
 0 0.01258431 3.05E-18 0.362633904 0 0.084913152 0.00581471 0.011791477  
 0.017924664 0.031030667 0.048955331  
 TCGA-CG-4444-01 0.16062332 0 1.01E-18 0.136962121 0.047006792 0.019450638 0  
 3.81E-19 9.2E-19 3.59E-18 0.003723624 0 0.011424909 5.48E-20 0.135175492  
 0.02309016 0.014336259 0.01986325 0 0.017225806 0.013481125 3.04E-19  
 0.44247423 0.00068576 1.2E-18 0.037795296 0 0.117135366 0.340613755  
 0.039200612 0.00601911 0.032828387 0.014708765 0.044549157 0.011915539  
 0.000858205 3.3E-18 0.038409247 0.069608485 9.75E-20 0.041374751 0 0  
 0.004949134 0.001990595 0.010852172 0.000708977 0.01190779 0 0.02407391  
 2.23E-18 0.009204886 2.47E-19 0.035251521 1.79E-20 0 0.003220311 0.026446167

0 0.371388453 9.31E-19 0.083922137 0.156148094 0.003390252 0.168142929  
 0.006740562 0.174883491  
 TCGA-CG-4449-01 0.138145609 0 0.085140635 1.99E-18 0.084923783 0.001331787 0  
 6.17E-18 0 2.32E-19 0.003052525 4.51E-18 7.29E-19 0 0.112430986 0.117045712  
 5.39E-18 0.024512821 0 0.028463022 0.09754348 0 0.513486379 0  
 0.010283679 4.88E-19 0.005638815 0.26300599 0.455589959 0.080384486  
 0.03353034 0.035875776 0.032265037 0.013839209 0.008250618 0.001198513 0  
 0 0.062727476 2.36E-19 0.015844647 4.6E-19 0 0.035267474 0 2.72E-18  
 0.002907111 0.001144641 0 2.46E-17 0 6.14E-18 0.118841776 0 1.89E-18  
 0.008477659 6.16E-18 0.064176728 0 0.383939858 0 1.54E-18 0.139823562  
 1.02E-17 0.059719136 0.05391358 0.113632716  
 TCGA-CG-4460-01 0.14365845 6.53E-19 6.62E-19 0.017845931 0.168271757 1.1E-19 0  
 2.49E-18 4.03E-19 5.8E-19 0.00314898 0 4.14E-19 1.2E-18 0.056604542 0  
 0.000135087 0.035250583 1.02E-18 0.023833677 1.02E-19 2.16E-19 0.404542929  
 9.48E-20 0 5.67E-18 0 0.029045135 0.30969356 0.039552134 0 0.007591429  
 0.01048094 0.015424216 0.007711084 4.56E-19 0 5.64E-19 0.050624574  
 0.001182 1.93E-18 0 0 2.2E-18 0.001044409 0.001876578 0.005928086 0 0  
 0 3.27E-18 5.74E-21 4.43E-18 0.018430125 3.91E-18 0 0.000854686 0.025376509  
 6.89E-18 0.472529477 0 0.108887959 0.081243072 0 0.037988081 3.77E-19  
 0.037988081  
 TCGA-CG-4462-01 0.118710814 0.001628702 0.043134321 2.46E-19 0 0.007226342  
 0.045478643 6.2E-18 0 1.43E-19 0 0 3.16E-19 2.83E-18 0.285748812  
 0.099873464 0 5.62E-19 4.05E-19 0.053061105 0.153071674 0 0.478063269  
 1.06E-20 0.29770185 0.055809545 0.004827045 0.363083154 0.889361985  
 0.044427549 0.076600657 0.076469927 0.047704708 0.080020795 0.010392838  
 0.021328778 0.003200186 3.19E-18 0.008736185 0.037640813 0.25579856  
 1.32E-18 9.87E-19 0.075173974 1.1E-18 0 0.003357618 0.125190136 0 0  
 1.29E-17 3.82E-18 0.171757373 1.98E-18 1.29E-18 0.077948905 2.75E-18 0.046844649  
 0 0.446636791 0 2.67E-19 0.001683536 0.003922665 0.347275044 0.226201113  
 0.573476157  
 TCGA-CG-4465-01 0.214451196 0.00287641 0.001041385 0.061167717 0.068443662  
 0.032965343 3.31E-18 0 0 0 0.007582839 0 0.03918712 2.98E-19  
 0.067887888 0.009294661 0.023256327 0.025741612 3.63E-19 0.013854596  
 0.006064197 0 0.489560192 0.000870968 0 0 0.004818966 0.014819456  
 0.081876688 0.046905341 0.003267174 0.12026802 0.075868172 0.06976595  
 0.010195959 0.00034318 0 0.015236069 0.072405233 0.003099696 0.04423745  
 5.36E-19 0 0.0000572 0.001746709 0.002297496 0 0.014713112 0  
 0.010536646 8.87E-18 0.027928667 0.036992509 0.019224362 0 0 0.001471058  
 0.043228594 0 0.379888562 2.96E-18 0.080017135 0.233611502 6.27E-20  
 0.176291237 0.004470303 0.18076154  
 TCGA-CG-4466-01 8.21E-19 0 2.79E-18 0.00358158 0.154550879 0.016694051  
 7.37E-18 1.22E-19 1.68E-17 4.19E-18 0.007108105 4.52E-18 3.5E-18 0 0.047227086  
 0 0.000507064 0.029786454 1.37E-18 0 0 1.28E-19 0.442674221 3.14E-18 0  
 0 0 0.006544198 0.301788281 0.059000457 0 0 2.06E-20 0.004765648

0.000361579 4.83E-19 4.89E-18 0.001207213 0.088623923 0.002412511 0  
 6.83E-18 1.72E-17 0 0.000585163 0.002383809 0.002781909 9.09E-20 3.09E-17 0  
 2.3E-17 0.018513541 0 0.009041672 0 3.27E-18 0.010424214 0.048567283 0  
 0.302048758 2.35E-17 0.104971924 0.263269124 0 0.002628772 0 0.002628772  
 TCGA-CG-4469-01 0.211948938 1.92E-18 0 0.052022283 0.022770244 0.023740071  
 0.010725479 0.000465666 4E-19 4.22E-19 0.01358616 0.017353114 0.009486894  
 1.24E-18 0.090652156 1.98E-18 0.01268355 0.024206515 3.18E-18 0.047471121  
 0.010292866 6.35E-18 0.512721819 1.6E-19 0 0 0.003680662 0.036041795  
 0.477805183 0.077212958 0.004946547 0.024292151 0.017181561 0.027343559  
 0.010075978 0 0 0.002067393 0.042152893 0 0.084626805 0 1.28E-17  
 0.000969491 5.02E-21 0.004325354 0.000800856 0.013901584 1.57E-19 5.26E-18  
 5.64E-18 0.015586216 0.001449688 0.003177276 0.018788298 0 0.002113953  
 0.047893553 0 0.29521253 0.011392441 0.017774647 0.171798031 0.003904039  
 0.166805801 0.005146433 0.171952234  
 TCGA-CG-4472-01 0.287899277 4.6E-19 8.96E-18 0.090589168 0 0.032312961  
 0.028758052 0.000866746 0 0 0.002889102 0.036713446 0.053356609  
 2.68E-20 0.311360159 0.100506573 0.037324603 0.008011444 0.013268434  
 0.072934951 0.005149926 9.26E-21 0.483950309 0 0.15559265 0.087137997  
 2.81E-19 0.320878547 0.728436832 0.052609712 0.005539239 0.091486636  
 0.043022035 0.057727413 0.039495692 0.006015882 2.27E-18 0.000826094  
 0.039596404 0.013236531 0.032027872 1.99E-18 0 1.98E-18 4.21E-21 0.00146369  
 0.004828685 0 0 0 5.02E-18 0.009046733 8.67E-18 0.001361208 0  
 1.49E-19 0 0.028244598 0 0.508873327 1.55E-18 1.15E-18 0.051835546 0  
 0.242743007 0.080371288 0.323114294  
 TCGA-CG-4474-01 0.173555996 0 0.037317199 0.143509304 0 0.032834577  
 0.025538174 0.000157676 5.65E-19 0.000284564 0.005398537 0.025918019  
 0.051086052 3.05E-20 0.094834951 0.03110191 0.063823975 0.00872617 0  
 0.015321027 0 0.000230179 0.484764244 0.000912623 5.9E-19 0.036065934  
 0.008245504 0.120019629 0.16949604 0.064909018 0 0.084947846 0.038914444  
 0.060955056 0.01831082 0.000207841 0 0.052922503 0.070568342 0.018959675  
 0.024117322 3.72E-20 0 0 0 0.008085143 0.001046908 0.002126195 0  
 0.016282147 0 0.042741823 0.047519348 0.023469487 0 1.88E-18 7.71E-19  
 0.043338651 3.89E-19 0.353133463 0.008717712 0.036932295 0.074295499  
 0.007117152 0.209758926 2.95E-19 0.209758926  
 TCGA-CG-4475-01 0.100864668 0.004201291 0.058836313 0 0.039439704 0.003779427  
 0 4.11E-19 0 0 0.006203189 0 0 1.22E-17 0.049324145 0.06283957  
 5.77E-19 0.00699202 0 0.006261325 0.080188634 0 0.436909251 0  
 0.060048429 0.029547043 0.001839246 0.119355359 0.130630954 0.029077973  
 0.037184942 0.030721126 0.014012881 0.026596175 0.002441434 0.003541992  
 0.004339809 1.47E-18 0.039684538 0.003428562 0.052818645 1.06E-17 0.06686719  
 0.030500174 0 0 0.004983943 0.009027504 6.21E-18 6E-19 0 0  
 0.152541899 0.003036511 0 1.15E-18 1.09E-17 0.04120475 0 0.504588645 0  
 0.023521037 0.081404844 0 0.067513356 0.072219177 0.139732534  
 TCGA-CG-4476-01 0.240203301 2.62E-19 5.33E-19 0.123926694 0 0.028343221

|                 |             |             |             |             |             |             |             |
|-----------------|-------------|-------------|-------------|-------------|-------------|-------------|-------------|
| 0.026391189     | 1.28E-19    | 0           | 2.79E-18    | 0.010466937 | 0.024014188 | 0.033347081 | 0           |
| 0.255144875     | 0.061969146 | 0.032627848 | 0.008013227 | 2.96E-18    | 0.033973654 |             |             |
| 0.016903987     | 0.018543197 | 0.390938088 | 0           | 0.06781882  | 0.139095741 | 0           |             |
| 0.256372889     | 0.216152995 | 0.021796905 | 0.009453755 | 0.061706161 | 0.034164836 |             |             |
| 0.058885114     | 0.017248224 | 0.005942177 | 2.25E-18    | 0.037289422 | 0.026238512 |             |             |
| 7.62E-20        | 0.027447427 | 0           | 0           | 6.92E-19    | 0.001595446 | 0.003567933 | 0.001949551 |
| 0               | 0           | 0           | 0.004977895 | 2.01E-17    | 0.000489435 | 1.05E-20    | 6.24E-18    |
| 0.020970738     | 0           | 0.489806445 | 3.68E-19    | 0           | 0.068193593 | 0           | 0.205872731 |
| 0.042361404     | 0.248234135 |             |             |             |             |             |             |
| TCGA-CG-4477-01 | 0.276067645 | 2.03E-18    | 1.78E-19    | 0.158146909 | 0.134904    | 0.064936745 |             |
|                 | 1.25E-18    | 2.71E-19    | 1.36E-19    | 6.43E-18    | 0.006003569 | 0.044220089 | 0.064974182 |
|                 | 1.05E-17    | 0.12971304  | 0           | 0.026279593 | 0.034777773 | 1.83E-18    | 0.021251389 |
|                 | 0.012032525 | 8.32E-18    | 0.561510202 | 0           | 1.95E-18    | 2.95E-19    | 3.99E-19    |
|                 | 0.175755686 | 0.206154876 | 0.011419303 | 0.051145478 | 0.044942252 | 0.011216672 |             |
|                 | 4.02E-21    | 0           | 4.47E-19    | 0.025890905 | 0.042495876 | 0.012124643 | 0.034571471 |
|                 | 1.98E-17    | 0           | 0.003835121 | 0           | 0.005670957 | 0.000728986 | 0.022020823 |
|                 | 4.57E-18    | 0           | 0.068489739 | 0           | 0.026384533 | 0           | 0           |
|                 | 1.49E-18    | 0.363058407 | 0           | 0           | 0.311002004 | 0.010137271 | 0.220904106 |
|                 | 0.006016262 |             |             |             |             |             |             |
|                 | 0.226920369 |             |             |             |             |             |             |
| TCGA-CG-5716-01 | 0.203863293 | 2.14E-18    | 7.64E-18    | 0.386145395 | 0.030579304 | 0           |             |
|                 | 0.035128703 | 6.83E-19    | 0.010257859 | 0.002716379 | 1.89E-19    | 0.020281216 | 0.049740114 |
|                 | 2.91E-18    | 0.073427331 | 1.72E-18    | 0.155200887 | 1.8E-20     | 1.43E-19    | 0.013473867 |
|                 | 0.03119283  | 0.012852294 | 0.643364462 | 5.86E-20    | 0           | 2.39E-18    | 0.004327306 |
|                 | 0.055710677 | 0.077379252 | 0.064045342 | 0.015906433 | 0.005438528 | 0.006958826 |             |
|                 | 0.014874834 | 0.012378513 | 0.007470493 | 7.68E-19    | 0.169077121 | 0.088836498 | 0           |
|                 | 0.003801568 | 0           | 8.69E-18    | 0.028963244 | 0           | 0.003210904 | 0.000406047 |
|                 | 0.004238777 |             |             |             |             |             |             |
|                 | 0           | 0.055206108 | 0.014027254 | 0.019478781 | 0.030956567 | 0.118009151 | 0           |
|                 | 0.035874784 | 0.045753216 | 0.050559028 | 2.25E-18    | 0.29221709  | 0           | 0.107097568 |
|                 | 0.05724101  | 0           | 0.305740107 | 0.015596415 | 0.321336522 |             |             |
| TCGA-CG-5717-01 | 0.35377592  | 0.000488468 | 0.000444354 | 0.158121551 | 0.095386604 |             |             |
|                 | 0.001114316 | 0.003200014 | 1.35E-18    | 0.038091422 | 0           | 0.002016939 | 0.003400958 |
|                 | 0.049409518 | 0           | 0.123130828 | 0.00662848  | 0.060201947 | 0.000008    | 0.002364349 |
|                 | 0.022788799 | 0.045451302 | 0.004590144 | 0.770267815 | 0           | 0.007318883 | 2.1E-18     |
|                 | 0.114923757 | 0.051611867 | 0.381317428 | 0.03341427  | 0.002143292 | 0.011942308 |             |
|                 | 0.008990842 | 0.00568311  | 0.008473881 | 0           | 0.053784246 | 0.039989972 | 0.007277125 |
|                 | 0.029831166 | 0           | 0           | 0.037886227 | 0.000907368 | 0.014751848 | 0.000263285 |
|                 | 0.011658264 | 1.42E-18    | 0           | 0           | 0.028084841 | 0           | 0.006784155 |
|                 | 0.016096108 |             |             |             |             |             |             |
|                 | 2.56E-18    | 0.00016023  | 0.369644756 | 4.29E-18    | 0.243596329 | 1.36E-19    | 0.059387003 |
|                 | 0.000664355 | 0           | 0.158811522 | 0.026629326 | 0.185440848 |             |             |
| TCGA-CG-5718-01 | 0.207359666 | 0           | 0.041700473 | 0.045928372 | 0.136559247 | 0           | 0           |
|                 | 2.36E-18    | 0           | 0           | 6.76E-19    | 2.5E-19     | 0.005467087 | 1.49E-18    |
|                 | 0.019624603 | 1.63E-18    |             |             |             |             |             |
|                 | 0.035482405 | 3.52E-19    | 0           | 0.003905602 | 0.048544411 | 0.002262734 | 0.574561186 |
|                 | 0.004153117 | 4.4E-19     | 0.016481564 | 0.067360896 | 0.009905772 | 0.047609672 |             |
|                 | 0.038165995 | 0.03204943  | 0.041887425 | 0.023903966 | 0.000125382 | 0           | 0.013413412 |

|                 |             |             |             |             |             |             |             |             |   |
|-----------------|-------------|-------------|-------------|-------------|-------------|-------------|-------------|-------------|---|
|                 | 0.006539734 | 0.077695164 | 0.037516083 | 0.040231316 | 0           | 0.118522813 | 0.042249473 |             |   |
|                 | 1.64E-21    | 9.64E-19    | 0.000181805 | 0.024604961 | 7.57E-18    | 0.066523661 | 9.85E-18    |             |   |
|                 | 0.022586789 | 0.235223903 | 0.02652924  | 0           | 0           | 0.0000664   | 0.034725532 | 0           | 0 |
|                 | 0           | 0.212823361 | 0.003901467 | 2.48E-18    | 0.099405198 | 0.026348764 | 0.125753962 |             |   |
| TCGA-CG-5719-01 | 0.139257373 | 0.007827585 | 0.127762414 | 6.39E-21    | 0.04604892  | 0           |             |             |   |
|                 | 0.004113585 | 0           | 0.005184595 | 0.005161305 | 3.02E-20    | 4.05E-19    | 0.011406594 | 0           |   |
|                 | 0.074855223 | 0.148267396 | 0.023654957 | 0.000248979 | 0           | 0.007288012 | 0.175668336 |             |   |
|                 | 0           | 0.636136962 | 0           | 0.252687586 | 0           | 0.002333286 | 0.252451239 | 0.237433479 |   |
|                 | 0.070320949 | 0.111325969 | 0.028695219 | 0.02292249  | 0.04318121  | 0           | 0.00868566  |             |   |
|                 | 0.003946601 | 5.61E-20    | 0.075844457 | 0.042989654 | 0.028097971 | 8.63E-20    | 0.087786982 |             |   |
|                 | 0.110024741 | 0           | 0           | 0.000904803 | 0.002540362 | 4.41E-18    | 0.05764634  | 7.86E-19    |   |
|                 | 0.022743306 | 0.232757185 | 0.004347916 | 2.87E-18    | 0           | 5.11E-18    | 0.042160354 |             |   |
|                 | 4.03E-19    | 0.162594004 | 0           | 0.11586683  | 0.035580196 | 1.33E-17    | 0.044414376 |             |   |
|                 | 0.218091754 | 0.26250613  |             |             |             |             |             |             |   |
| TCGA-CG-5720-01 | 0.249927096 | 0.012819056 | 0.029964691 | 0.054908802 | 0.1116799   |             |             |             |   |
|                 | 5.43E-20    | 2.94E-20    | 2.59E-20    | 0           | 3.27E-19    | 0           | 0           | 0.029822288 | 0 |
|                 | 0.02134126  | 0.007419916 | 0.005625421 | 0.011751815 | 0.021805827 | 0.08258433  | 0           |             |   |
|                 | 0.568639719 | 0           | 0.029674134 | 0           | 0.012195646 | 0.131725522 | 0.254344319 |             |   |
|                 | 0.083471427 | 0.056886926 | 0.027342427 | 0.03564361  | 0.046926153 | 0.001882549 |             |             |   |
|                 | 0.006242038 | 0.00171956  | 0.035267377 | 0.119752212 | 0.033259149 | 0.077364606 | 0           |             |   |
|                 | 0.000140853 | 0.065160878 | 1.88E-21    | 6.16E-20    | 0           | 0.027439054 | 0           | 0.066013761 |   |
|                 | 0.004738428 | 0.027603085 | 0.069775846 | 0.028985113 | 0           | 0           | 0           | 0.067869947 |   |
|                 | 7.83E-19    | 0.169028205 | 0           | 0.125732496 | 0.058614369 | 0           | 0.140495509 | 0.06253876  |   |
|                 | 0.203034269 |             |             |             |             |             |             |             |   |
| TCGA-CG-5720-11 | 0.283142857 | 0.004878664 | 7.38E-20    | 0.393411246 | 0.089486218 | 0           |             |             |   |
|                 | 0.015949118 | 0           | 0.015119449 | 2.36E-18    | 7.34E-19    | 0           | 0.064752968 | 3.15E-19    |   |
|                 | 0.150121273 | 0.00436061  | 0.116664535 | 3.77E-19    | 0.003056394 | 0.028842439 |             |             |   |
|                 | 0.011276517 | 0.017259286 | 0.629905871 | 6.94E-19    | 0.027647248 | 0           | 0.026808146 |             |   |
|                 | 0.062290982 | 0.297581205 | 0.062249877 | 0.007594563 | 0.014352732 | 0.026879025 |             |             |   |
|                 | 0.026129557 | 0.005244331 | 0.000734435 | 0.00207775  | 0.212492119 | 0.083336458 |             |             |   |
|                 | 0.01163659  | 0.004099253 | 6.64E-18    | 1.28E-18    | 0.017827404 | 0           | 0.009488223 |             |   |
|                 | 0.001230963 | 3.47E-19    | 8.4E-19     | 0.083776223 | 0.004638442 | 0.11773422  | 0.056537276 |             |   |
|                 | 0.118564269 | 0           | 0.045348076 | 0.041382362 | 0.037932353 | 0           | 0.132411149 |             |   |
|                 | 4.73E-18    | 0.126344488 | 0           | 0           | 0.308806191 | 0.021901215 | 0.330707406 |             |   |
| TCGA-CG-5721-01 | 0.423223331 | 0.006188203 | 0.041408228 | 0.178200545 | 0.221781596 |             |             |             |   |
|                 | 0.026950524 | 0.041399277 | 3.97E-18    | 0           | 0           | 0           | 0.163347225 | 0.266164711 |   |
|                 | 0.07976436  | 0.26709077  | 0.002741498 | 0.103514557 | 6E-20       | 1.21E-18    | 0.065677453 |             |   |
|                 | 0.02418862  | 0.012172992 | 0.467047792 | 4.39E-19    | 0.062489405 | 0           | 1.24E-19    |             |   |
|                 | 0.016012472 | 0.618486494 | 0.050654465 | 0.008368359 | 0.101584561 | 0.095798929 |             |             |   |
|                 | 0.019477939 | 9.59E-21    | 1.27E-18    | 0.004115933 | 0.049753716 | 0.077487307 | 0.041019533 |             |   |
|                 | 0.030716787 | 5.98E-19    | 0.049710691 | 0.032691031 | 0.002159601 | 0.002184851 |             |             |   |
|                 | 0.0000135   | 1.13E-19    | 4.76E-18    | 0.097498409 | 0.00692206  | 0.175940903 | 0.064370888 |             |   |
|                 | 0.020085022 | 1.39E-19    | 3.2E-19     | 0.019432823 | 0.014194915 | 0           | 0.221161068 |             |   |
|                 | 0.016796061 | 0.322549945 | 0.202792053 | 0           | 0.367799708 | 0.046433114 | 0.414232822 |             |   |

TCGA-CG-5722-01 0.388341313 0.011480384 1.04E-18 0.362689902 0.17132146  
0.012885832 0.045933446 1.39E-18 4.58E-19 7.8E-18 0.01682965 0.152829268  
0.247763468 0.055930555 0.212510348 0.048734164 0.140800863 0.011282962  
0.009967738 0.032833064 0.077335195 1.33E-19 0.561545247 2.34E-19 0.113451961  
0 0.001548775 0.198335301 0.464326702 0.05970684 0.027089098 0.019104522  
0.018196898 0.024300466 4.6E-19 5.93E-19 0.004642774 0.153288027 0.140116373  
0.021539218 0.005211822 1.03E-19 0 0.062588058 0 0.040320749 0.001131269  
1.26E-19 2.09E-18 0.100845775 0.005639123 0.123260943 0.104124722 0.040261222  
0 2.38E-19 0.034771073 0.042713315 0 0.20127886 0 0.196016602  
0.271201868 0 0.381779052 0.101133771 0.482912823

TCGA-CG-5722-11 0.131536449 0.000842219 0 0.122638787 0.001530693 0  
0.020529402 0 0.013212584 0.034066458 0 0.081336595 0.092121221 0  
0.208062951 0.04127376 0.077996117 5.4E-20 0 0.012777291 0.044705191  
0.021814344 0.618851229 0 0.219657311 0 0.005250974 0.14449328  
0.233614516 0.0510155 0.019847068 0.003967712 0.008029629 0.009968452 0  
0.002208514 1.83E-20 0.025514119 0.035032445 0.001362412 0.027407794 0 0  
0.033928818 0.003082014 5.68E-18 0.011374349 0.006731473 0 0.054184296  
0.00228074 0.013321154 0.154496569 0.073178119 6.69E-19 0.044696586  
2.18E-18 0.039146916 2.66E-18 0.297650833 2.86E-19 0.040438399 0.005270037  
4.2E-18 0.18444933 0.13260236 0.317051691

TCGA-CG-5723-01 0.370554974 0.002212375 0.03022844 0.083918466 0.13622364  
0.0110858 4.43E-19 2.78E-18 0 4.82E-19 0.016121915 0.051092377 0.117233651  
0 0.110184037 0 0.047460469 0.008131794 1.18E-19 0.053778511 0.005552747  
0 0.546728276 5.02E-19 0.008082219 0 9.84E-19 0.017799788 0.457613103  
0.077562396 0.005353532 0.083468412 0.074667487 0.012502123 0 0  
0.002031295 1.44E-19 0.089967356 0.030026001 0.064591781 0 0.080142953  
0.012792774 0 2.46E-18 0.002211967 0.012983593 1.44E-18 0.010397611  
3.58E-18 0.082944887 0 0.037349692 0 0 0.014356831 0.071685058  
9.24E-21 0.397338246 0 0.228677479 0.208446032 1.06E-18 0.233222093  
0.00792367 0.241145763

TCGA-CG-5724-01 0.252615908 0.006488197 0.049129091 0.01447289 0.179948562  
2.59E-20 0 0 2.74E-19 1.03E-18 0.000481415 1.6E-19 1.93E-18 0 0.063763646  
0.00331823 0.014000813 0.000717677 4.17E-18 0.03348233 0.012046745  
5.27E-18 0.753840528 3.33E-19 0 4.19E-19 0.000875964 0 0.397382436  
0.161813293 0.006542062 0.019398258 0.024924133 0 0 0 0.000693469  
0.002329003 0.10278116 0.075176239 0.037619932 7.1E-19 0.127483379  
0.021101316 0 0 6.16E-21 0.001695592 8.5E-18 0.062241439 0.029832595  
0.014224763 0.067956361 0.002459243 0 5.05E-18 0.016046479 0.067107911 0  
0.171005183 0 0.212015521 0.126169954 0 0.071112667 0.009267471  
0.080380138

TCGA-CG-5725-01 0.048085482 0.005874252 0.00552827 0 0.145196978 1.67E-20  
4.34E-18 1.97E-18 0 0 0.007401205 0.023146018 0.009715724 0 0.021623234  
0 1.96E-20 8.45E-19 0 7.62E-20 0.030400323 0 0.347627119 0 0.03186601  
1.32E-18 0.001930389 0.051637591 0.067996879 0.049770151 0.024105151

|                 |             |             |             |             |             |             |             |             |
|-----------------|-------------|-------------|-------------|-------------|-------------|-------------|-------------|-------------|
|                 | 6.41E-19    | 0.00238572  | 0.00056758  | 0           | 1.93E-19    | 0.007903422 | 1.24E-18    | 0.107271596 |
|                 | 0.051656289 | 1.15E-17    | 0           | 0.029880692 | 0.025318666 | 0.001252062 | 0.001089932 |             |
|                 | 0.006769639 | 1.22E-18    | 0           | 0.030458409 | 0.037388616 | 1.62E-18    | 0.107118519 |             |
|                 | 0.008077216 | 0           | 1.07E-18    | 0.008650392 | 0.011994614 | 4.1E-19     | 0.285655    | 0           |
|                 | 0.195429686 | 0.047360745 | 0           | 0.015430679 | 0.034070292 | 0.049500971 |             |             |
| TCGA-CG-5726-01 | 0.085729183 | 6.14E-20    | 4.32E-19    | 0.001432119 | 0.064513558 | 2.86E-21    |             |             |
|                 | 1.33E-18    | 6.35E-18    | 1.52E-18    | 0           | 0           | 0           | 0           | 0.047489058 |
|                 | 6.91E-18    | 0.042545722 |             |             |             |             |             |             |
|                 | 0.00641345  | 0           | 0           | 0.001906921 | 0           | 0.58106072  | 0           | 0           |
|                 | 0.002132273 |             |             |             |             |             |             |             |
|                 | 0.028632165 | 0.022020667 | 0.053871304 | 0.004195707 | 0.003527829 | 0.003042383 |             |             |
|                 | 0.016473947 | 0.001065846 | 0           | 5.65E-19    | 0           | 0.124588344 | 0.024951945 | 0           |
|                 | 0           |             |             |             |             |             |             |             |
|                 | 1.57E-17    | 0.013015398 | 0.001014884 | 8.13E-21    | 0.000366339 | 0.00034105  | 4.62E-17    |             |
|                 | 0.06482775  | 0.04095786  | 0.002735519 | 0.037998178 | 0.01226767  | 2.48E-18    | 0           |             |
|                 | 0.011512663 | 0.037254683 | 4.81E-19    | 0.214405202 | 0           | 0.201145826 | 0.090905292 |             |
|                 | 4.59E-19    | 0.004244562 | 0.000953461 | 0.005198023 |             |             |             |             |
| TCGA-CG-5728-11 | 0.3900344   | 0.001073966 | 6.9E-19     | 0.877444044 | 0.075070304 |             |             |             |
|                 | 0.022611237 | 0.098870372 | 0           | 0.029899158 | 1.4E-17     | 0           | 0.131980455 | 0.190341457 |
|                 | 0.022127833 | 0.18192601  | 0           | 0.309389253 | 0           | 0.005162017 | 0.042853619 |             |
|                 | 0.017295346 | 0.018789584 | 0.560683863 | 0           | 0.067420176 | 0           | 0.008969026 |             |
|                 | 0.119784797 | 0.291655016 | 0.042193086 | 0.013933411 | 0.025289268 | 0.026291811 |             |             |
|                 | 0.008207604 | 0.02020762  | 0.000551942 | 0.004835641 | 0.350345806 | 0.078236115 |             |             |
|                 | 0.008305564 | 0.019564607 | 0           | 1.61E-18    | 0.021872853 | 0           | 0.085416086 | 0.001109412 |
|                 | 0           | 5.3E-19     | 0.073978503 | 6.72E-18    | 0.07120867  | 0.059133078 | 0.168181318 | 0           |
|                 | 0.027582079 | 0.066949691 | 0.041346783 | 7.19E-20    | 0.178496566 | 0           | 0.131845756 |             |
|                 | 0.014474588 | 6.05E-18    | 0.757419464 | 0.042894744 | 0.800314208 |             |             |             |
| TCGA-CG-5730-11 | 0.191733222 | 0.005341509 | 0           | 0.109658326 | 0.133463434 | 3.17E-20    |             |             |
|                 | 7.91E-19    | 7.32E-19    | 0           | 2.36E-18    | 2.82E-21    | 1.01E-18    | 0.030494316 | 0           |
|                 | 0.129975841 |             |             |             |             |             |             |             |
|                 | 0.03231971  | 0.066507608 | 0           | 0.011976078 | 0.008728897 | 0.014446154 | 0.009376722 |             |
|                 | 0.553368161 | 1.76E-19    | 0.04146361  | 0           | 0.040511117 | 0.108607039 | 0.128349083 |             |
|                 | 0.068846607 | 0.014939955 | 0.006273077 | 0.021997317 | 0.0232625   | 0.004446042 | 0           |             |
|                 | 0           | 0.071779385 | 0.075486514 | 0.023976459 | 0           | 0           | 0.015904171 | 1.4E-20     |
|                 | 0           |             |             |             |             |             |             |             |
|                 | 0.003309037 | 0.007064063 | 1.15E-17    | 0.070199269 | 6.07E-18    | 0.125749667 | 0.053885459 |             |
|                 | 0.092237915 | 0           | 0.034094667 | 4.54E-18    | 0.032796608 | 0           | 0.18188032  | 0           |
|                 | 0.072333698 | 0.01544423  | 6.39E-18    | 0.097031419 | 0.030625637 | 0.127657055 |             |             |
| TCGA-CG-5732-01 | 0.223704972 | 0.030524642 | 0           | 0.311804773 | 0.081809713 | 9.03E-19    |             |             |
|                 | 0.017158696 | 2.1E-18     | 0.009157139 | 0           | 0.001382717 | 0.026205396 | 0.066703124 | 0           |
|                 | 0.05640495  | 1.65E-18    | 0.091990139 | 0.002688326 | 8.25E-19    | 0.01437026  | 0.003446378 |             |
|                 | 0.002122622 | 0.571174413 | 0           | 1.29E-18    | 1.9E-18     | 0.021881653 | 0.020882785 |             |
|                 | 0.124317566 | 0.054503916 | 0.003522576 | 0.012868224 | 0.013465802 | 0.036998255 |             |             |
|                 | 0.0000504   | 0.001271659 | 0.010713253 | 0.138342924 | 0.069985248 | 0.015443406 |             |             |
|                 | 0.002972804 | 0           | 0.014210711 | 0.007678903 | 4.08E-19    | 0.005076171 | 0.000892733 |             |
|                 | 0.011124325 | 1.31E-17    | 0.062270307 | 0.042160945 | 0.03319739  | 0.004887616 |             |             |
|                 | 0.066565907 | 0           | 0           | 0.033987366 | 0.039549771 | 0           | 0.144620417 | 1.79E-18    |
|                 | 0.081359425 | 0.026665966 | 0           | 0.254345854 | 0.01698551  | 0.271331364 |             |             |
| TCGA-CG-5733-11 | 0.284748846 | 0           | 0           | 0.502619823 | 0.036212712 | 5.62E-20    | 0.040268828 |             |

4.69E-18 4.53E-18 0.004986 0.000854441 0.109225522 0.166111667 0.008434561  
 0.148655101 0 0.153829653 0 0.017124212 0.022786844 0.042038899  
 0.005767214 0.596255525 2.22E-19 0.016785416 0 0.006719589 0.166414866  
 0.244234224 0.045727307 0.032237011 0.019125635 0.023436408 0.003970917  
 0.022004411 0.003684785 0.008581522 0.23301096 0.091163631 1.12E-19  
 0.020869149 2.16E-18 0.232996045 0.034577481 0 0.023035234 0.001641755 0  
 3.02E-18 0.093357385 1.32E-17 0.084101202 0.006647974 0.17511943 0  
 4.81E-18 0.014523765 0.038148463 5.06E-19 0.185300138 1.49E-17 0.128775169  
 0.020550725 0 0.468265732 0.029412158 0.49767789  
 TCGA-CG-5734-01 0.300147072 0 0.012831501 0.208473162 0.161633854 0.004046247  
 0.023713669 1.3E-19 0 0.003502437 0 0.007994036 0.094752907 0  
 0.249969457 0 0.096091007 0 6.83E-19 0.04961291 0.066580255 0.030845584  
 0.674000525 0.00218347 0 4.06E-19 0.013393864 0.088300627 0.549323145  
 0.075245502 0.040661792 0.088719509 0.063222877 0.032609161 0.004353067  
 0.000785235 0.002317348 0.077326658 0.078697899 0.030388951 0.040791114  
 7.69E-18 0.031339416 0.044859946 0 0 0.000266937 0.028383559 0  
 0.049619726 0 0.132052935 0.083834753 0.097128981 0 9.2E-18 0.014035936  
 0.076490219 0 0.106747373 0 0.119815168 0.006668017 0.037042918  
 0.306115293 0.033290128 0.339405421  
 TCGA-CG-5734-11 0.168723277 0.101398742 3.09E-17 0.03577688 0.178402744 0 0  
 0 0 1.49E-17 5.41E-22 8.15E-18 0.011738046 2.3E-17 0.073696769 0.033170408  
 0.027091727 0 0.005071737 0.007643636 0.034928188 0.006170236 0.616324471  
 4.47E-19 0.037653548 0 0.045565026 0.171835043 0.190749036 0.082339801  
 0.031428465 0.003122695 0.014796869 0.025319712 0.003364407 0.003777166  
 3.1E-19 0.036399535 0.079992605 0.014944006 0.029667683 2.06E-17 1.27E-17  
 0.02945015 0 0 0.002087233 0.014616035 3.61E-19 0.09179862 1.12E-17  
 0.13419617 0.019662072 0.072078001 0 0.056973237 6.46E-18 0.049743313 0  
 0.13951508 2.67E-17 0.06701027 0 3.77E-18 0.066907715 0.086990239  
 0.153897954  
 TCGA-D7-5577-01 0.313725052 0.006843661 0.003383668 0.077965457 0.162881666  
 0.002901133 0.020571177 6.69E-18 0 0 0.012602001 0.065601795 0.144113794  
 0.015649119 0.072390343 0.002328872 0.043785104 0.000986534 0 0.027381951  
 0 1.27E-19 0.659729197 1.85E-19 0.00359004 4.05E-20 0.001526545 0.038482717  
 0.188998217 0.095503099 0.004159348 0.114699975 0.101225013 0.040235813  
 0.003051993 0 0.00452658 0.012752671 0.092258115 0.007853168 0.010106651  
 4.49E-20 0.079414713 0.005525011 7.01E-21 0.00577962 0 0 0.065602804  
 0 0.091994276 0.072085126 0.005594253 0 3.44E-19 0.007442873 0.048651867  
 1.17E-18 0.16681784 1.02E-18 0.286304873 0.161259101 1.86E-18 0.199205215  
 0.00521685 0.204422065  
 TCGA-D7-5578-01 0.242688521 0.001485868 0.038376614 0.111864159 0.059160738 0  
 0 2.03E-18 9.66E-18 1.7E-19 0 4.04E-18 0.010561333 0 0.070415419  
 0.039303722 0.044304751 0.00142272 1.46E-19 0.011837854 0.075401824  
 6.29E-20 0.575067851 1.85E-19 0.105325241 0 0.010374713 0.162230606  
 0.174574928 0.060743513 0.040363707 0.022112254 0.033461153 0.035066974 0

|                 |             |               |             |             |             |             |             |
|-----------------|-------------|---------------|-------------|-------------|-------------|-------------|-------------|
|                 | 0.007606789 | 0.002558298   | 0.057007589 | 0.135811025 | 0.034085134 | 0.008306458 |             |
|                 | 6.63E-18    | 0.004600801   | 0.053192951 | 0           | 3.98E-19    | 0.000284383 | 0.003660739 |
|                 | 0.166811575 | 2.56E-19      | 0.011356312 | 0.099626228 | 0.051234528 | 0           | 0.00132233  |
|                 | 0.06641678  | 1.15E-19      | 0.167316482 | 2.64E-17    | 0.175387443 | 0.031124891 | 0           |
|                 | 0.105187643 | 0.091106466   | 0.196294109 |             |             |             |             |
| TCGA-D7-6518-01 | 0.275412356 | 0.004909064   | 0.133074361 | 0           | 0.015673904 | 6.55E-19    |             |
|                 | 0.010915279 | 6.42E-18      | 5.98E-19    | 0           | 0           | 8.48E-19    | 1.46E-18    |
|                 | 5.01E-18    | 0.096936355   | 0.206198876 | 0.015710887 | 0.004194127 | 0.001967907 | 0.012189192 |
|                 | 0.21301958  | 0.009717106   | 0.377865541 | 2.4E-20     | 0.348488557 | 3.13E-19    | 0.005057244 |
|                 | 0.40607055  | 0.227478691   | 0.032973108 | 0.137043517 | 0.021053883 | 0.037641659 | 0.005153909 |
|                 | 1.16E-19    | 0.012706311   | 0.015843579 | 0           | 0.054151127 | 0.050670833 | 0.005723954 |
|                 | 8.03E-19    | 0.060609762   | 0.122881295 | 0.005693455 | 0           | 0.010701885 | 0.002078076 |
|                 | 5.84E-19    | 0.137573021   | 0           | 1.28E-18    | 0.213157368 | 0.01547419  | 4.5E-18     |
|                 | 0           | 6.43E-18      | 0.044113874 | 0           | 0.285206431 | 8.89E-19    | 0.082957667 |
|                 | 2.72E-18    | 0             | 0.033841474 | 0.2832086   | 0.317050074 |             |             |
| TCGA-D7-6519-01 | 0.110062339 | 0.006704729   | 0.006828383 | 0           | 0.032872149 | 8.73E-20    | 0           |
|                 | 0           | 2.61E-18      | 7.68E-18    | 0.00365916  | 0           | 0.017471082 | 2.1E-18     |
|                 | 0.040929916 | 0.019111822   | 0.005000091 | 0.003181693 | 0.003173455 | 0.006610843 | 0           |
|                 | 0.00331144  | 0.710271521   | 8.56E-19    | 2.86E-18    | 3.41E-18    | 0           | 0.107784944 |
|                 | 0.098559295 | 0.135515698   | 0.000709518 | 0.008190094 | 0.010587226 | 0.01042999  | 0.001454479 |
|                 | 0           | 0.00400214    | 0           | 0.070114588 | 0.080032334 | 0           | 3.78E-18    |
|                 | 0.167834105 | 0             | 1.1E-19     | 0           | 0.001176678 | 1.71E-19    | 0           |
|                 | 0.023873496 | 3.5E-18       | 0           | 0.026334444 | 0.00104379  | 1.42E-18    | 1.54E-19    |
|                 | 0           | 0.039897789   | 3.18E-19    | 0.245331595 | 9.57E-18    | 0.151979758 | 0.097177624 |
|                 | 6.84E-18    | 0.013044571   | 0.003352364 | 0.016396935 |             |             |             |
| TCGA-D7-6520-01 | 0.168732261 | 0.011465943   | 0.0746727   | 0.004298663 | 0.001872779 |             |             |
|                 | 5.21E-20    | 0.005339749   | 1.08E-18    | 0.001457015 | 3E-19       | 0           | 4.45E-19    |
|                 | 2.86E-19    | 7.07E-19      | 0.011304817 | 0.090655644 | 0.017413431 | 0.001179429 | 0           |
|                 | 0           | 0.003829494   | 0.004096919 | 0.617231599 | 2.13E-19    | 0.1339325   | 0           |
|                 | 0.003450447 | 0.139166787   | 6.48E-19    | 0.051459033 | 0.010306867 | 0.03640718  | 0.047460598 |
|                 | 0.043565141 | 3.89E-20      | 0.0022079   | 0.012125764 | 2.66E-19    | 0.043307061 | 0.072155761 |
|                 | 0.003636838 | 7.09E-18      | 0.090979276 | 0.006556276 | 0           | 2.89E-20    | 0.002488931 |
|                 | 0.000338211 | 3.6E-18       | 0.066959577 | 0.025951607 | 0.00239956  | 0.164551139 | 0.008972645 |
|                 | 1.82E-19    | 0             | 0           | 0.034843826 | 0           | 0.255830677 | 0           |
|                 | 0.048075728 | 0.02460643    | 0           | 0.032518542 | 0.074613969 | 0.10713251  |             |
| TCGA-D7-6521-01 | 0.344034733 | 0.020399622   | 0.068463749 | 0.182659964 | 1.14E-18    |             |             |
|                 | 1.85E-19    | 0.03010816    | 0           | 1.7E-18     | 0.000363894 | 0           | 0.038131454 |
|                 | 0.080472448 | 0             | 0.037546035 | 0.073826575 | 0.045787281 | 0           | 0.000955279 |
|                 | 0.015024196 | 0.055038044   | 0.00846878  | 0.497878502 | 8.51E-20    | 0.142227192 | 2.85E-20    |
|                 | 0.008539294 | 0.234666156   | 0.015833401 | 0.033024719 | 0.035250328 | 0.064801273 | 0.045132141 |
|                 | 0.085346982 | 0.007451394</ |             |             |             |             |             |

TCGA-D7-6522-01 0.404377191 0.011950339 0.065809385 0.560101213 0.091789119 0  
0.122274781 0 0 0 0 0.118546485 0.201466999 0.019807683 0.493447548  
0.109031161 0.201453994 0 0.019806056 0.09417314 0.164311849 0.03281704  
0.439188997 1.34E-21 0.363116128 0.009778175 0.010715227 0.353976626  
1.013254981 0.02961511 0.109858537 0.127381245 0.114846578 0.069215925  
0.017201102 0.007665768 0.006415996 0.305170804 0.100622265 0.058769965  
0.102778189 2.47E-18 0.121536798 0.12309981 0 0.055056167 0.001127061  
3.86E-20 3.64E-19 0.091476119 0 0.126177112 0.174060047 0.026279724  
4.94E-18 0.009831258 0.044166979 0.021363634 0.004001277 0.079990816  
9.24E-20 0.111669414 0.013310941 0 0.701998943 0.269689157 0.9716881

TCGA-D7-6524-01 0.193097918 0.002467337 0.092382736 1.16E-18 0 0 0.01032548  
1.76E-17 0 3.37E-18 0 1.42E-18 2.25E-20 3.61E-18 0.071577529 0.083946072  
0.017313512 0 0 0.010835408 0.186100077 0.009428383 0.687114604 0  
0.188490317 4.65E-19 0.002284089 0.286363927 0.060901482 0.099213568  
0.119320981 0.020512979 0.023276664 0.029650327 0 0.015866781 0.007384497  
0 0.04413898 0.052621711 0.052333222 6.17E-19 0.119268206 0.101202963  
0.000197263 1.29E-17 0.000436898 0.035210222 7.68E-18 0.049129033 0 0  
0.177119308 5.91E-19 2.74E-19 1.75E-17 4.39E-18 0.072262007 0.001392299  
0.243216417 0 0.046399033 0.001300924 0 0.085546809 0.188528866  
0.274075674

TCGA-D7-6525-01 0.192941957 0.009966154 0.033735627 0.022537782 0.036873935 0  
0.002196092 0 0 0 0 0 0.01075897 0 0.025757852 0.039479088  
0.021159219 0.021131011 0 0.016237799 5.05E-19 0.002537882 0.659028466  
4.47E-19 0.067580489 2.35E-18 0 0.043309196 0.191846759 0.08858654  
0.002780137 0.028546448 0.039717204 0.007268876 0.001864866 3.41E-23  
0.000243196 5.69E-19 0.074082543 0.057706107 0.00939609 0 0.126222484  
0.007274082 0.000351753 0 0 0.001083524 7.94E-18 0.06443408 0.040895637  
0.007667231 0.078480386 0.012690685 3.29E-18 3.53E-19 7.27E-19 0.033377012 0  
0.332991264 0 0.195800476 0.000830973 3.76E-19 0.054802927 0.038773322  
0.093576249

TCGA-D7-6526-01 0.086234191 0 0 0.015085761 0.062653657 0 5.33E-18 0 0  
3.23E-18 0 2.76E-18 0 0 0.021411963 0.000103265 0.005651648 7.49E-20  
3.41E-18 0.000519845 0 0.004118066 0.621619204 4.12E-19 0.032728415 0  
0.006370981 0.059231074 0.074538775 0.068503448 1.09E-19 0 0.01094619  
0.000184715 9.97E-24 0.000479464 0 0.006871022 0.079705757 0.011669233  
4.58E-19 0 0 0 2.71E-19 0.00947465 0.001052907 0.013626002 0  
0.099461191 9.83E-18 3.13E-19 0.073482738 0.009469677 0 0 6.11E-19  
0.058036699 0 0.207165376 0 0.105339028 0.078689305 0 0.022233116  
0.016364207 0.038597323

TCGA-D7-6527-01 0.171103224 0 0.019916104 0.01002364 0.08543746 0 0 0  
0.010938722 0.00693407 7.24E-19 2.08E-18 1.45E-19 2.27E-20 0.029402146  
0.017953248 0.001466284 0.02550488 1.78E-21 0.006561797 0.071195477 0  
0.534201256 0 0.080214052 2.87E-18 0.009203544 0.15707189 0.039755745  
0.045289094 0.045594025 0.004390587 0.008222517 0.007928195 0.002808695

0.003660749 0.001822959 0.010742679 0.088158792 0.012714832 5.1E-19  
 6.44E-19 0.033715973 0.043634033 0.001195655 1.75E-19 0.00097904 0.005800949  
 1.75E-18 0.039082571 0.006099751 1.73E-19 0.061397269 0.038969326 0  
 0.008005903 0 0.051794455 0.000288437 0.23518772 1.14E-18 0.121299974  
 0.045200424 1.25E-17 0.01972378 0.075704765 0.095428544  
 TCGA-D7-6528-01 0.013520157 1.76E-21 0 0 0.082735962 4.2E-20 3.63E-18 0 0  
 0 0 1.54E-19 2.03E-19 0 0.027762121 0.008309351 0.009238329 0.012140731  
 0 1.32E-20 0 1.19E-18 0.560592032 1.22E-18 0 1.45E-18 0.003680819  
 0.008547092 0.180995234 0.062737036 0 0 0.012105402 0.002673417  
 0.000561112 1.83E-20 0.00340848 0 0.107037501 0.045621308 4.78E-18  
 1.23E-20 0.013404676 0.00692724 0.002752047 1.38E-19 0.0000119 0 1.2E-18  
 0.096987091 0.019309656 0.003119363 0.124221233 0.009702684 0 0  
 0.011325759 0.039506322 4.05E-19 0.165774807 0.010217865 0.136666205  
 0.052490896 0 0.000374075 8.8E-22 0.000374075  
 TCGA-D7-6815-01 0.080776548 0.002159898 0.040334158 0.006656633 0.004999739  
 0.002742092 0.004206602 0 0.004147628 0 0 0 0.004042711 0  
 0.047389033 0.038974053 0.014809075 4.5E-21 0 0.004130187 0 0.005116738  
 0.581370522 1.8E-19 0.01425235 0 0.008553827 0.054744164 0.106970109  
 0.059364896 0 0.012238475 0.014045413 0.023323588 0.006898332 0  
 5.77E-19 9.76E-19 0.056665856 0.038417657 0.000730211 6.92E-19 3.52E-19  
 2.69E-18 0 6.33E-19 0.001145485 0.001140974 1.25E-19 0.072707492 8.97E-20  
 0.007793163 0.071890244 0.018980189 0 0 4.07E-18 0.037688285 1.32E-19  
 0.269946666 0 0.072988455 0.038470651 0.0049314 0.0246077 0.008206124  
 0.032813824  
 TCGA-D7-6817-01 0.127868217 0.00059782 9.78E-18 0.196085202 6.97E-19 0.003664881  
 0.029882557 9.84E-20 0.005524756 4.65E-19 0 0.001990848 0.038889314  
 2.06E-18 0.053519737 0.000633335 0.091754263 0.00159319 0 0.003793281  
 5.95E-19 0.022048566 0.629535049 0 2.39E-18 0 0.009804732 0.048085567  
 0.05126821 0.077232589 0.001596025 0.004026962 0.001752988 0.030174754  
 0.011509861 0.002095298 0 0.08263115 0.042039915 0.020505211 0.002280415  
 0 0 4.22E-19 0 0.009087143 0.00033362 0 3E-18 0.019741878 0  
 0.010119294 0.032432106 0.028120346 0 0.012800344 0.008576289 0.040940423  
 7.07E-19 0.181172636 1.2E-20 0.058404503 0.033145479 4.03E-18 0.161156756  
 0.00029891 0.161455666  
 TCGA-D7-6818-01 0.132219648 0.003570845 0.168919101 0.000712102 0.1145951  
 7.89E-20 0 5.95E-18 0 2.91E-18 2.05E-19 0 0 0 0.062728869 0.021555291  
 0.07350486 0 0.00758499 0.009789424 0.114919242 0.013795574 0.36035017  
 0.001194637 0.144793546 0.00656132 0.016679553 0.103099883 0.173450464  
 0.020403791 0.065523905 0.071055484 0.066352831 0.050764796 0.006784106  
 1.69E-19 0.020646022 4.33E-19 0.053436667 0.029107451 0.153000533 1.18E-18  
 0.112019749 0.058054728 0 0 0.037175303 0.015537202 0 0.012356499 0  
 0.005972203 0.270354832 0.002183184 0 4.55E-18 0.003785392 0.030247772  
 0.003099231 0.137762515 0 0.150789606 1.71E-19 1.56E-17 0.180449617  
 0.131641817 0.312091433

TCGA-D7-6820-01 0.099605164 3.56E-20 2.33E-18 0.008897942 0.129936039 1.67E-19  
0.004012088 1.73E-18 0.020172297 8.46E-19 2.7E-18 0 2.47E-19 1.26E-18  
0.035955355 0 0.015915999 4.46E-19 2.28E-18 0.013348046 0.070096806  
0.007537546 0.603169958 4.09E-18 0 0 0.003672481 0.026187533 0.238600846  
0.087855112 0.034285032 0.023706171 0.026940637 0.052332006 0.001440331  
5.64E-22 0.005257299 0.002185324 0.055805661 0.019013769 0.003825357  
1.48E-18 0.055881038 0.053497463 2.71E-20 0 0.001230605 0.016207665  
6.36E-18 0.045973831 0.048200827 0.006691178 0.121450643 0.017015998 0  
0.00392985 0.00658446 0.049722891 0 0.089447158 1.09E-17 0.108978356  
0.111581915 0 0.049975372 0.035048403 0.085023775

TCGA-D7-6822-01 0.093368747 0.001311455 0 0 0.084985377 1.87E-19 2.7E-19  
8.27E-19 0 9.4E-18 0.006081717 0.034508604 0.021237266 1.77E-18 0.045353782  
0 0.009692201 0.01067785 0 0 0 0.005362013 0.569660249 0 0 0  
0.00077058 0.016575937 0.007141008 0.056754717 0.000232857 0.011437357  
0.017474336 0.001985833 0.003589093 5.72E-20 0.027002158 0.000935976  
0.028952368 0.017157923 0 0 0.054976751 6.8E-21 0.000395744 0.004032306  
0.000392687 0.010894105 0 0.011761431 0.011047015 0.01410589 0.154711095  
0.018962106 2.32E-18 0 0.001650019 0.065069405 1.97E-18 0.314051847  
2.36E-17 0.127094086 0.147761712 2.65E-18 0.043860782 0.000655728 0.044516509

TCGA-D7-8570-01 0.421495914 0 0.047800696 0.208582196 0.104652663 0.026061355  
0.08691175 1.67E-18 1.33E-19 0 0.001926461 0.077131221 0.136713495  
0.027857588 0.222388474 0.002134197 0.058007092 0.006527679 1.42E-20  
0.065157725 0.027682016 0.003511291 0.348799328 0 0.064685525 0  
0.00151289 0.026038357 0.289192145 0.01377886 0.011296746 0.174507241  
0.106822953 0.076880508 0.01854206 3.75E-20 0.0061949 0.06165149  
0.075575569 0 0.027072172 1.87E-19 0.16202186 0.019787791 0 0.004247649  
0.000323874 0 0 0.140002032 0 0.092046021 0.127617392 0.02894189  
1.41E-18 0 0 0.011116846 0 0.161873825 0.010501737 0.169142483  
0.107549983 0.030132025 0.383002604 0.04618377 0.429186374

TCGA-D7-8572-01 0.164460707 0.009641711 0.148149827 0.047178619 0.109085277  
0.003120869 2.4E-21 0 0 2.23E-19 0 0.005920099 0.007174215 5.06E-18  
0.026699313 0.042930182 0.018292676 0.007753715 1.3E-18 0.009302357  
0.024073282 1.47E-18 0.502946761 6.98E-19 0.139079254 2.83E-18 0.006363271  
0.032386578 0.107214263 0.040130819 0.004666605 0.028919693 0.03785897  
0.011016108 0.005353331 0 0.00642934 1.43E-19 0.064140168 0.070276129  
0.013894804 6.99E-18 0.108686484 0.015711531 1.74E-19 0.001854059 0.000440895  
0.005684583 1.14E-18 0.009538609 0 0.026409343 0.128099288 0.016346377 0  
1.23E-18 0.003337898 0.028877293 0.00125594 0.290218311 0 0.078494625  
0.075789097 1.33E-19 0.077502324 0.086397124 0.163899448

TCGA-D7-8573-01 0.084259463 0 9.06E-18 0.030854826 0.092625209 0.005776137  
2.9E-18 2.54E-18 3.71E-20 1.62E-17 0.004420762 0 0 0 0.088208748 0  
0.012609011 0.022267893 0 0.002058974 0.000474701 0.010799717 0.583828967  
2.17E-20 1.88E-17 0 0.001258393 0.017199232 0.141337673 0.09739016  
0.003533955 0.0000726 0.002432644 0.003562709 0.003660624 0.000600152

8.55E-20 0.016413536 0.095495651 5.61E-20 1.08E-17 0 5.93E-18 0.003216006 0  
 0.009933272 0.000236845 0.003400388 2.63E-17 0.131729273 0.013637971  
 0.011007724 0.07445045 0.011342062 3.86E-18 0 0.009824332 0.055292682 0  
 0.269417289 0 0.160298602 0.185637417 0 0.033898061 0.000237351  
 0.034135412  
 TCGA-D7-8574-01 0.395226611 0 0.00408921 0.885131834 2.06E-17 0.049551867  
 0.142477315 0 0 2.84E-17 0.001884621 0.200047767 0.189539557 0.051076157  
 0.146895826 0.101172124 0.332995316 0.004511839 0.006976956 0.013031255  
 0.048621488 0 0.232818751 0 0.310203266 0.007706332 0.001208555  
 0.271811211 0.003259374 0.012862835 0.021515375 0.017060124 0.020865737  
 0.02634106 0.015374653 0.007619697 0 0.380480197 0.00015548 0.048332238  
 0.004904872 0 0 0.028496135 0 0.06126129 0.00198332 2.32E-18  
 3.13E-18 0.052476277 0 0.004205232 0.076540895 0.024948893 0 0.031127879  
 0.035630116 0.01046729 1.29E-18 0.281685393 4.81E-18 5.14E-19 0.030567411 0  
 0.75703367 0.179412377 0.936446047  
 TCGA-D7-8575-01 0.170724343 2.92E-19 1.06E-18 0.14914983 0.016083823 0.007861785  
 0.001682077 4.02E-20 0.029843763 5.42E-20 2.4E-19 0.003251072 0.028899183  
 4.04E-18 0.117245717 0 0.06772979 0 0.001689112 0.023904694 1.51E-18  
 0.015043373 0.621492271 0 0.042482468 0 0.004030846 0.002380306  
 0.2343333 0.054720273 9.6E-20 0.078998043 0.042488173 0.052699139  
 0.022409073 0.004653474 0 0.016930634 1.03E-18 0.025876463 0.038818661  
 2.82E-18 3.76E-19 0 1.09E-18 0.008889681 0.000671791 0.00120371 3.25E-19 0  
 0 0.014810627 0.044531412 0.024013024 0.0035011 0.034876016 0  
 0.032180817 1.12E-17 0.285547172 0.003669989 0.002941448 0 0.016428941  
 0.221852305 0.021241234 0.243093539  
 TCGA-D7-8576-01 0.127398362 0.00034541 0 0.021314412 0 0.0000709  
 0.001531704 0 0 1.72E-18 0.001295801 0.001202388 0.00470601 6.72E-19  
 0.03720184 0.021075993 0.021551239 0.018304702 0.002949812 0.010258452  
 0.064323293 0.004052168 0.613366682 0 0.039872418 0 0.007140586  
 0.132593003 0.073154193 0.05061907 0.032817389 0.044679889 0.02708961  
 0.06500514 0.01097975 0.006919211 0.003194257 0 0.081398577 0.013190393  
 0.001669354 1.81E-19 1.02E-18 0.038907083 0.000966675 0 0.000119244  
 0.002068202 7.24E-18 0.034870192 0.017854868 0.009086836 0.077881777  
 0.020394961 0 0 0 0.023564101 7.61E-20 0.302893887 0 0.046812585  
 0.068948378 0 0.064149744 0.052270561 0.116420304  
 TCGA-D7-8578-01 0.182344495 0.005972861 0.160692611 0.031988848 0 0 0  
 1.3E-18 0 3.09E-18 0 5.36E-19 0.003445711 1.26E-18 0.010054393 0.068890834  
 0.055589422 0.001500404 0 0.000985581 0.00167125 0.018019121 0.587655427  
 0.000531617 0.155941524 3.89E-19 0.008530389 0.155740274 0.012885888  
 0.046099478 0.003090084 0.015836158 0.013823032 0.021813152 3.81E-19  
 0.002303618 0.009552213 0.015649587 0.01873944 0.076754572 0 0  
 0.085668721 0.000118833 0 8.81E-19 0.001565368 0 1.59E-19 0.052315056 0  
 0.023136876 0.199531813 0.004873951 3.04E-18 0 0 0.027092963 1.3E-18  
 0.318502229 1.35E-18 0.03499111 0 0 0.044553139 0.081792818 0.126345956

TCGA-D7-8579-01 0.132837241 0 6.15E-19 0.024090687 0 6.6E-20 0.010567374  
3.32E-18 0.0104797 2.84E-18 0 0.004987186 0.010885132 2.94E-18 0.160159631  
0.115668414 0.022574515 1.19E-18 0 0.021590089 0.080408575 0.027983072  
0.538983818 0 0.335690914 0.071940083 0.008952117 0.268967978 0.367980557  
0.053148108 0.038102754 8.98E-20 0.009357037 0.017904473 0.01177116  
0.016979155 0 0.005036645 0.04176106 0.026633755 0.049499689 0 0  
0.044560344 0.015923905 0 0.004326681 0.01362918 5.32E-18 0.041758831  
6.92E-18 7.79E-19 0.123441525 0.001420458 9.29E-20 0.026568118 0 0.024146051  
3.3E-19 0.356277023 1.14E-17 0.00533883 0.019042859 0 0.102367375  
0.208049744 0.31041712

TCGA-D7-A4YT-01 0.047057277 5.2E-21 0 8.18E-20 0.094301656 4.7E-21 0 0  
1.85E-19 4.55E-18 2.06E-19 0 5.01E-20 0 0.004077846 0.008145413 0.005369237  
0 0 2.09E-19 0 0 0.335401218 0 2.12E-17 9.01E-18 0.000357485  
0.035143837 0.005984674 0.028387776 0.002620677 5.05E-19 0.000235176  
0.001590052 0.0072439 0 0.00561006 0 0.038655473 0.020212915 0  
1.49E-18 0.062073849 0 2.6E-19 0 0.008286401 2.33E-19 0 0.044484481  
0.019132617 0 0.09619802 0.004768087 0 0 0 0.024184679 0  
0.312401962 0 0.120525373 0.119153322 3.88E-18 0.004829266 1.06E-17  
0.004829266

TCGA-D7-A4YU-01 0.451698828 0 2.91E-18 0.404823593 0.063302962 0.039550624  
0.053853158 0 0 2.72E-18 0.003702852 0.090957507 0.110245639 0.026543681  
0.092412373 0.027604244 0.11625645 0.012913328 8.35E-19 0.035648233  
0.021980332 0.000351033 0.418576303 0.000359781 0.090925184 4.13E-20  
0.001926661 0.081349489 0.111016354 0.042647939 0.01113251 0.038843233  
0.049930776 0.013263264 0.0268187 0.003599228 2.92E-18 0.091938973  
0.036866486 0.013600818 0.022931466 0 0 0.008305483 0.002285338  
0.050907837 0.000637995 0.001107701 1.28E-18 6.22E-20 3.64E-18 0.070105407  
0.055183256 0.058840382 0.000999272 5.7E-19 0.02237037 0.01449249 0  
0.356837065 0.038355171 0.123796072 0.15640118 2.18E-19 0.414320977  
0.056452758 0.470773735

TCGA-D7-A4YV-01 0.241898751 7.2E-19 0 0.166975402 0.033992521 0.018106516  
0.044053589 1.58E-21 0 7.63E-20 0.010419267 0.129191506 0.148680986  
0.022607652 0.181237207 0.025638042 0.076862698 0.013707564 1.38E-18  
0.02590884 0.017487763 0.007249377 0.411803974 0.00000286 0.036221378  
0.030513981 0 0.059070382 0.310159505 0.041968902 0.009661952 0.037482814  
0.030825792 0.042113794 0.011303724 0.003388746 0 0.044661529 0.010791287  
2.65E-19 0.018624873 7.06E-18 0 0.007570465 1E-19 0.024522223 0.00195029  
0 0 8.94E-19 0 0.046732489 0 0.015457773 0.002108622 9.21E-18 0  
0.006488213 0 0.458356392 0.014491029 0.031820216 0.140603285 9.52E-18  
0.264491024 0.026854571 0.291345595

TCGA-D7-A4YX-01 0.213428787 0.000939351 0 0.059683532 0.139599211 0.018626772  
0.026207397 4.24E-19 1.41E-18 0 0.014595019 0.058294292 0.092621747  
0.00496113 0.063019279 0 0.045372271 0.014329557 0 0.013814799  
0.001488495 1.23E-20 0.562691729 1.35E-18 0 0 0.001258793 0.012044757

|                 |             |             |             |             |             |             |             |             |
|-----------------|-------------|-------------|-------------|-------------|-------------|-------------|-------------|-------------|
|                 | 0.099459508 | 0.054608522 | 0.003958708 | 0.042882922 | 0.036508488 | 0.016990845 |             |             |
|                 | 0.00470881  | 0.001066554 | 0.002288661 | 0.005543199 | 0.081353008 | 1.01E-18    | 0           | 0           |
|                 | 0.030519677 | 0.004865069 | 1.39E-19    | 0.003113944 | 0.0000761   | 0           | 4.91E-20    |             |
|                 | 0.050640332 | 0.012182203 | 0.057728522 | 0.061729268 | 0.009712821 | 1.03E-18    |             |             |
|                 | 9.15E-18    | 0.004312991 | 0.031303301 | 0           | 0.251684289 | 0.014822986 | 0.142920571 |             |
|                 | 0.180336313 | 0.00774628  | 0.11958957  | 0.001213923 | 0.120803493 |             |             |             |
| TCGA-D7-A4YY-01 | 0.243463596 | 0.003919114 | 0           | 0.054164238 | 0.0275293   | 0.009399902 |             |             |
|                 | 0.001737482 | 0           | 0.015517879 | 0.005223209 | 0.002117165 | 0.008049602 | 0.047168376 |             |
|                 | 1.05E-19    | 0.032265965 | 0.015637841 | 0.070157179 | 0.009637597 | 3.02E-19    | 0.012764343 |             |
|                 | 0           | 0.004738343 | 0.574332275 | 0           | 0.051742618 | 0           | 3.13E-20    | 0.092903376 |
|                 | 0.144172725 | 0.070700559 | 0           | 0.106487071 | 0.078455987 | 0.047350506 | 0.00390717  |             |
|                 | 0.00057581  | 0.001817673 | 0.013965178 | 0.043496163 | 0.030376483 | 0.001354222 |             |             |
|                 | 3.17E-18    | 0.045804094 | 0           | 0.00078607  | 0           | 0.000364534 | 5.3E-20     | 0           |
|                 | 0           | 0.043127627 | 0.026270337 | 0.004114072 | 8.73E-19    | 0           | 0           | 0.03259609  |
|                 | 2.35E-18    | 0.389664734 | 6.64E-18    | 0.106840519 | 0.057081757 | 0.009082842 | 0.127643326 |             |
|                 | 0.027830866 | 0.155474192 |             |             |             |             |             |             |
| TCGA-D7-A4ZO-01 | 0.2980403   | 0           | 0.028985354 | 0.206462974 | 0.00880348  | 0.006614587 |             |             |
|                 | 0.028141711 | 0           | 0.011749641 | 0           | 0.005018781 | 9.38E-21    | 0.016237532 | 4.99E-18    |
|                 | 0.11928262  | 0.039579614 | 0.065728406 | 0.001014088 | 0.000570547 | 0.021326191 |             |             |
|                 | 0.140434333 | 0.018389493 | 0.712396707 | 0           | 0.031282413 | 0.003514633 | 0.009590606 |             |
|                 | 0.181137781 | 0.071014462 | 0.106712097 | 0.079948531 | 0.015648164 | 0.012800328 |             |             |
|                 | 0.0277054   | 0.015555976 | 0.03133956  | 5.38E-19    | 0.097312502 | 0.019282018 |             |             |
|                 | 0.04080429  | 0.047694108 | 5.66E-20    | 0           | 0.078921647 | 0           | 0.027559724 | 0.001289176 |
|                 | 0.007682371 | 0           | 0.014432707 | 4.63E-18    | 0.009312681 | 0.067649061 | 0.011116491 |             |
|                 | 0.008386123 | 0.018322407 | 2.24E-18    | 0.065956412 | 1.44E-18    | 0.312503564 | 1.16E-18    |             |
|                 | 0.014039082 | 0.011551339 | 2.88E-18    | 0.221839517 | 0.085858373 | 0.30769789  |             |             |
| TCGA-D7-A6EV-01 | 0.077740435 | 3.8E-20     | 0           | 0.014577368 | 0.071204588 | 0           | 3.68E-19    | 0           |
|                 | 0.00678836  | 1.08E-19    | 0.00564884  | 0           | 2.02E-18    | 4.62E-19    | 0.012417861 | 0           |
|                 | 0.029820096 | 0.001913607 | 0           | 0.004309096 | 0           | 0           | 0.638993839 | 1.05E-19    |
|                 | 1.75E-18    | 0.003353966 | 0.017059637 | 0.056860297 | 0.067288204 | 0.001406995 |             |             |
|                 | 0.008751438 | 0.014353633 | 0.010520004 | 0.012024296 | 0.00024036  | 9.21E-20    |             |             |
|                 | 0.004722014 | 0.096288757 | 0.027098724 | 0           | 0           | 0.019197603 | 6.86E-19    | 4.08E-19    |
|                 | 0.000234463 | 0           | 6.66E-19    | 0.040762177 | 0.004456243 | 7.05E-21    | 0.037538593 |             |
|                 | 0.012809049 | 4.06E-18    | 0           | 0.012296093 | 0.038154242 | 0           | 0.155575221 | 2.07E-18    |
|                 | 0.104758478 | 0.145135748 | 2.57E-19    | 0.026441465 | 1.9E-20     | 0.026441465 |             |             |
| TCGA-D7-A6EX-01 | 0.082431513 | 0.004357516 | 0           | 0.020678721 | 0.093450214 | 0.00410947  |             |             |
|                 | 4.65E-18    | 2.99E-20    | 0.026261236 | 0           | 0.001993718 | 0.002718271 | 0           | 0           |
|                 | 0.018126619 | 0.064598213 | 0.009986422 | 4.24E-19    | 0.000981004 | 2.37E-18    | 0           |             |
|                 | 0.20441509  | 0           | 0.12783675  | 8.78E-21    | 0.00000709  | 0.029359684 | 0.03388984  |             |
|                 | 0.022126314 | 0.008366261 | 2.51E-19    | 0.001409509 | 0           | 0.003336893 | 0.000662342 |             |
|                 | 0.000652405 | 6.31E-19    | 0.066548341 | 0.008261014 | 1.17E-18    | 3.06E-18    | 0.085769124 |             |
|                 | 0.004561525 | 0.00957685  | 2.9E-18     | 0.043048357 | 1.11E-18    | 3.19E-19    | 0.009633262 |             |
|                 | 0.002998673 | 0.001044474 | 0.215599374 | 0.009801859 | 0           | 3.14E-20    | 0.021198228 |             |
|                 | 0.002897792 | 0           | 0.451899591 | 1.2E-17     | 0.119445618 | 0.121749462 | 0.016220833 |             |

|                 |             |             |             |             |             |             |             |
|-----------------|-------------|-------------|-------------|-------------|-------------|-------------|-------------|
|                 | 0.018476593 | 0.066097133 | 0.084573726 |             |             |             |             |
| TCGA-D7-A6EY-01 | 0.386479495 | 0.004371849 | 0.001576042 | 0.41590572  | 0.062241792 |             |             |
|                 | 0.017774809 | 0.026582206 | 0.003312059 | 3.96E-18    | 2.05E-17    | 0.000749336 | 0.02987532  |
|                 | 0.086883496 | 0.004769722 | 0.081250181 | 0.009691642 | 0.109355794 | 0.00846204  |             |
|                 | 5.01E-19    | 0.021822814 | 0.010133554 | 0           | 0.599254241 | 0           | 0.080089711 |
|                 | 0.001254144 | 0.039697258 | 0.053364345 | 0.081735695 | 0.006793241 | 0.037569122 |             |
|                 | 0.036668345 | 0.013556151 | 0.010647844 | 0.001559324 | 0.002939204 | 0.1545948   |             |
|                 | 0.053472749 | 0.035304156 | 0.019689203 | 0           | 0           | 0.014780511 | 0           |
|                 | 0.000031    | 0.003221313 | 2.42E-18    | 0.041790991 | 1.58E-17    | 0.074988336 | 0.069155428 |
|                 | 0.017789432 | 0           | 0           | 0.037794025 | 0.025710036 | 0           | 0.363346301 |
|                 | 0.155995208 | 9.94E-18    | 0.361362264 | 0.047297557 | 0.408659821 |             | 0.138704724 |
| TCGA-D7-A6EZ-01 | 0.345950477 | 0.003387271 | 7.9E-19     | 0.064197329 | 0.181893966 |             |             |
|                 | 0.021930282 | 1.39E-19    | 1.38E-18    | 0           | 0           | 0.011952414 | 0.03798323  |
|                 | 0.013276742 | 0.092957985 | 0           | 0.027652014 | 0.002796115 | 0           | 0.032690737 |
|                 | 0.021614938 | 0           | 0.325998562 | 5.32E-19    | 0.024947365 | 1.63E-18    | 0.0000387   |
|                 | 0.017208847 | 0.282654023 | 0.021044799 | 0.011247569 | 0.075819224 | 0.068711622 |             |
|                 | 0.019637459 | 0.002938    | 0           | 0.00398775  | 0.004122382 | 0.079605452 | 0           |
|                 | 0           | 0.183050153 | 0.014921961 | 0.003541752 | 0.005620435 | 0.000138071 | 0           |
|                 | 1.32E-18    | 0.031690561 | 0.007834895 | 0.06890326  | 0.059737584 | 0.015673913 |             |
|                 | 5.22E-18    | 1.46E-19    | 0.015668174 | 0.011091568 | 0           | 0.273644655 | 3.52E-19    |
|                 | 0.29096168  | 0           | 0.157975249 | 0.024974787 | 0.182950036 |             | 0.242618792 |
| TCGA-D7-A6F0-01 | 0.190825779 | 0.0000435   |             | 0.031297658 | 0.04396666  | 0.139703902 |             |
|                 | 1.37E-19    | 0           | 4.2E-18     | 0           | 0           | 0.009151366 | 0.004495672 |
|                 | 0.013035137 | 0.011959888 | 0           | 0           | 0.022584238 | 0.003433715 | 0           |
|                 | 1.01E-18    | 0           | 0           | 0.016606886 | 0.040748913 | 0.234422803 | 0.025965879 |
|                 | 0.021233434 | 0.02881744  | 0.015199297 | 0.003414002 | 0           | 0.00429066  | 0.003741881 |
|                 | 0.088951859 | 0.036789324 | 1.46E-18    | 0           | 0           | 0.011702114 | 0           |
|                 | 0.00377625  | 0           | 6.53E-18    | 0.025296069 | 0.049570381 | 0.054587412 | 0.077776632 |
|                 | 0.02560984  | 1.21E-17    | 0           | 0.014545357 | 0.012177946 | 7.72E-19    | 0.269646515 |
|                 | 0.229242403 | 0.126173004 | 4.48E-18    | 0.063796005 | 0.001738627 | 0.065534631 | 0           |
| TCGA-D7-A6F2-01 | 0.149798918 | 0           | 4.17E-19    | 0.059756065 | 0.032712801 | 0.000117187 |             |
|                 | 0.003921199 | 0           | 0.026924389 | 0.059911534 | 0.002579303 | 0.018036438 | 0.029887504 |
|                 | 0           | 0.070367214 | 7.63E-21    | 0.02119819  | 0.0066297   | 5.72E-21    | 0.012659505 |
|                 | 0.048297136 | 0.406967554 | 0.000102397 | 0.007335542 | 0.028625287 | 5.05E-19    | 0           |
|                 | 0.085815219 | 0.297176087 | 0.028161557 | 0.002790674 | 0.047520449 | 0.026735909 |             |
|                 | 0.041704572 | 0.007080714 | 0           | 0.001632973 | 0.012451483 | 0.034479345 | 0.006750865 |
|                 | 0.003907592 | 0           | 0           | 0           | 0.000313648 | 0.000798704 | 2.88E-19    |
|                 | 1.11E-18    | 0.018518404 | 0           | 0.014802733 | 0           | 4.02E-18    | 4.36E-18    |
|                 | 3.93E-18    | 0.354086466 | 0           | 0.106173596 | 0.057958792 | 0.004135573 | 0.131505266 |
|                 | 0.003667771 | 0.135173037 |             |             |             |             |             |
| TCGA-D7-A747-01 | 0.320538537 | 3.64E-19    | 0.010217187 | 0.284984016 | 0           | 0.003641599 |             |
|                 |             |             |             |             |             |             |             |

|                 |             |             |             |             |             |             |             |             |             |
|-----------------|-------------|-------------|-------------|-------------|-------------|-------------|-------------|-------------|-------------|
|                 | 0.290742884 | 2.11E-18    | 0.013477997 | 0.003126212 | 0.010927798 | 0.026700705 |             |             |             |
|                 | 0.005980248 | 0.008754712 | 0.007589216 | 0           | 0.108833482 | 0.018218472 | 0.037342913 |             |             |
|                 | 2.2E-19     | 0           | 0           | 5.85E-19    | 0.013673238 | 0.042782486 | 0.013034711 | 0.002290524 |             |
|                 | 2.59E-18    | 0.023516611 | 4.5E-18     | 0           | 0.0281849   | 0.01438968  | 0           | 0           | 2.96E-19    |
|                 | 0.010065751 | 0           | 0.605433953 | 0           | 5.66E-18    | 0.156814964 | 0           | 0.262465666 |             |
|                 | 0.195017959 | 0.457483624 |             |             |             |             |             |             |             |
| TCGA-D7-A748-01 | 0.313318624 | 0.120986844 | 0.111383834 | 0.062300403 | 2.43E-18    |             |             |             |             |
|                 | 0.003004722 | 0.006067752 | 0           | 3.48E-19    | 0.00919189  | 0.002635699 | 8.52E-20    |             |             |
|                 | 0.003646392 | 1.92E-18    | 0.268393935 | 0.122764237 | 0.022360599 | 3.65E-19    | 0.003501981 |             |             |
|                 | 0.04106963  | 0.063133433 | 0.010944444 | 0.609942899 | 0           | 0.126797061 | 0.043359521 |             |             |
|                 | 0.004363239 | 0.1356187   | 0.179725896 | 0.108755718 | 0.042306942 | 0.144660744 |             |             |             |
|                 | 0.094410263 | 0.098809455 | 0.012981227 | 0.002753023 | 0.014137181 | 0.012192033 |             |             |             |
|                 | 0.050625603 | 0.069046003 | 0.12265325  | 1.54E-18    | 0.01002222  | 0.029441617 | 0           |             |             |
|                 | 1.23E-19    | 0.002047949 | 0.020813899 | 5.62E-18    | 0.081256892 | 0           | 0.035945808 |             |             |
|                 | 0.037516798 | 0.001800247 | 0           | 0           | 1.91E-18    | 0.04582706  | 0           | 0.335818378 | 0           |
|                 | 0.042102301 | 6.91E-21    | 0.023405766 | 0.276949065 | 0.155458669 | 0.432407734 |             |             |             |
| TCGA-D7-A74A-01 | 0.129742724 | 1.01E-18    | 3.16E-18    | 0.033158525 | 0.04918925  | 0.011605111 |             |             |             |
|                 | 1.28E-18    | 1.36E-18    | 0           | 0.005173061 | 0.013777256 | 0.009321236 | 0.0310058   | 0           |             |
|                 | 0.041810148 | 0           | 0.02655185  | 0.017804089 | 0           | 0.003214878 | 1.59E-19    | 7.57E-19    |             |
|                 | 0.668460599 | 0           | 0           | 0           | 1.54E-20    | 0.01090357  | 0           | 0.129489955 | 2.37E-19    |
|                 | 0.001860964 | 0.001617335 | 0.000407062 | 0.00047642  | 1.61E-19    | 0.017420914 |             |             |             |
|                 | 0.088880348 | 0.013478581 | 7.57E-19    | 0           | 3.41E-18    | 0           | 3.63E-20    | 1E-19       | 0.002166707 |
|                 | 0           | 3.06E-18    | 0.026016763 | 0           | 0.017674485 | 0           | 0.014230822 | 0           | 0           |
|                 | 0.036641913 | 8.03E-18    | 0.266370361 | 1.13E-17    | 0.150654985 | 0.132451936 | 2.36E-18    |             |             |
|                 | 0.030734467 | 5.85E-19    | 0.030734467 |             |             |             |             |             |             |
| TCGA-EQ-8122-01 | 0.034921704 | 0.001695747 | 0.043013336 | 2.88E-18    | 0.030678252 | 0           |             |             |             |
|                 | 3.4E-19     | 5.85E-19    | 0           | 4.41E-18    | 1.12E-18    | 1.34E-18    | 7.15E-19    | 1.16E-17    | 0.010535266 |
|                 | 0.06582613  | 0           | 0.007041124 | 2.63E-18    | 0           | 0.068390866 | 0           | 0.574057599 | 0           |
|                 | 0.118226525 | 0           | 0.006101191 | 0.120677951 | 0.069431767 | 0.068709742 | 0.030919957 |             |             |
|                 | 0.001517962 | 0.01034494  | 0.003608743 | 0           | 0.004289936 | 0.004905195 | 0           |             |             |
|                 | 0.065709505 | 0.027858498 | 0           | 0           | 0.004671219 | 0.039289779 | 0           | 0           | 0.003252355 |
|                 | 0.001360248 | 1.46E-17    | 0.056083779 | 0           | 0           | 0.113567102 | 0           | 3.22E-18    | 0.003131044 |
|                 | 0           | 0.068385899 | 0.002488756 | 0.314296076 | 2.99E-17    | 0.123739254 | 0.04965155  |             |             |
|                 | 1.67E-17    | 0.001918807 | 0.094156569 | 0.096075376 |             |             |             |             |             |
| TCGA-EQ-A4SO-01 | 0.041666224 | 1.87E-19    | 3.72E-18    | 0.014985825 | 0.018054988 | 0.007373219 |             |             |             |
|                 | 2.58E-18    | 0.00376369  | 0.01136347  | 1.08E-19    | 0.008303274 | 9.19E-20    | 0.009672358 |             |             |
|                 | 5.24E-19    | 0.015616059 | 8.91E-18    | 0.046575846 | 0.023136132 | 1.72E-18    | 0.000824636 | 0           |             |

TCGA-F1-6177-01 0.132658113 0.000430435 4.7E-18 0.007465222 0.0716076  
4.34E-21 5.28E-18 0 0.023413261 0.017938487 0 0 0 2.78E-18 0.01735742  
2.86E-19 0.020536799 0 2.2E-18 0.011060973 0 1.73E-19 0.554920095  
2.17E-19 5.1E-18 2.24E-18 0.001200915 8.1E-20 0.117751137 0.075684808  
0.002510348 0.008964155 0.013667071 0.02298166 0 0 0.002623164  
0.004253025 0.079476602 0.008615196 1.62E-18 5.29E-18 0.092175808 0.007991603  
2.8E-19 7.05E-19 0.000044 0 0 0.144104561 0.00193229 0.005723574  
0.095587579 0.016053967 0 0 7.1E-20 0.06711621 0 0.059404975 0  
0.196429522 0.059395034 3.52E-19 0.0183269 0.000215218 0.018542117  
TCGA-F1-6874-01 0.207826005 0.0000139 0.059886581 0.023561593 0.12712482  
0.002759408 0.000906777 6.35E-20 0.005964551 0 0 0 0.015144225  
0.010249587 0.040857868 0 0.026377817 0 0 0.010840771 0.102520441  
1.15E-19 0.522480941 2.19E-19 3.97E-18 0 0.00727477 0.020541518 0.092012744  
0.036481041 0.04625318 0.029240026 0.035452063 0.020246624 0.003095481  
0.001201981 0.004785702 1.4E-19 0.010092071 0.015790772 0.026499087  
5.02E-18 0.003102767 0.039229087 3.33E-19 0 0.000498634 0.034136448 0  
0.030506002 0 0.047834758 0.166448855 0.015758108 0 0 2.33E-19  
0.037643793 3.14E-19 0.166989546 0.000879297 0.079245467 0.027627888  
0.026194443 0.084915604 0.051267158 0.136182761  
TCGA-F1-6875-01 0.013969483 0.003647981 0.000662735 8.74E-19 0.116815769 0  
0.00909759 1.87E-20 0.046383657 8.01E-19 1.6E-18 0.014708611 1.65E-18  
4.72E-18 0.000841248 0.016998875 0.024424483 0.005305903 8.03E-19 2.37E-19  
0.024620699 0 0.449465688 0 3.38E-19 7.11E-19 0.001325936 0.039731399  
0.007313747 0.03911936 0.016534087 3.55E-19 0.007818357 4.75E-20 2.03E-21 0  
0.008814468 0 0.074857501 0.041147793 0 5.59E-18 0.009532602 0.028279198  
0.004190358 0 0.005648702 0 1.42E-17 0.005736858 0.09185283 0  
0.182355967 0.008533403 3.14E-18 0 0.002594195 0.006649252 9.07E-19  
0.211478254 0 0.122414825 0.020539338 9.02E-19 0.009805741 0.01413434  
0.023940081  
TCGA-F1-A448-01 0.098979868 0 0.061466707 0.15998396 0 0.00729877  
0.000878323 0 0.005106564 0.026532209 0 0 0.013949684 0 0.136010729  
0.032640992 0.064732023 0.008397348 0 0.020434972 0.092654849 0.00292637  
0.575992487 0 0.045723168 1.13E-19 0.005842076 0.131302626 0.375226549  
0.079091536 0.047341003 0.027642983 0.023637684 0.028650442 0.005606564  
0.002853737 0 0.059519641 0.045685927 0.047571719 0.086986027 3.15E-19  
6.2E-19 0.048903738 0 0.015583962 0.000796968 0.01942845 1.46E-18  
0.036453895 2.63E-19 0.020385488 0.060237524 0.021145348 0 0.011136519  
9.65E-20 0.066730624 1.85E-21 0.209624491 0 0.053831296 0.092572181  
0.010760706 0.21533955 0.069189008 0.284528559  
TCGA-F1-A72C-01 0.175985325 0.012033994 0.07646512 0.094944032 0.091300974  
0.002100121 3.74E-19 4.43E-19 6.12E-19 0 0.002551113 1.79E-20 0.029241897 0  
0.028690273 0.013108752 0.02077062 0.01072287 3.66E-18 0.002896627  
0.007518824 0 0.522270007 3.63E-19 0.002029041 0 0.004359142 0.128130213  
0.139201823 0.045234239 0.015724255 0.032926806 0.03398519 0.033173553

0.000347313 0.0001702 0.004873113 0.028039963 0.079211581 0.019010023  
 1.73E-18 0 0.140568286 0.008619355 0 0.00842822 0.001774936 0  
 1.25E-17 0.028082175 0 0.054562617 0.024294612 0.031997586 1.55E-18  
 5.16E-19 0.000206466 0.03267342 0 0.295605627 2.12E-18 0.186172793  
 0.077975558 0 0.087409852 0.010790929 0.098200781  
 TCGA-FP-7735-01 0.220901405 0.011258052 0.016635994 0.095327172 0.08052849 0  
 0.006632131 3.1E-19 0.005979159 1.79E-18 0 0.005457737 0.013911259 0  
 0.041666425 0.000522577 0.035179247 0.003626745 0 0.006244489 0.111019454  
 0.0031888 0.611578651 0.000516895 1.17E-19 0.003949734 0.016427579  
 0.188493368 0.147072225 0.055103867 0.068042954 0.023291814 0.02099366  
 0.028759083 0 0.006251992 0.003876638 0.071537093 0.087730431 0.014082782  
 0.01022379 0 0.170265082 0.073298784 1.75E-18 0.005857051 0.001530283  
 3.47E-20 4.96E-18 0.097594171 2.73E-18 0.058552341 0.101623758 0.012364776 0  
 0 0 0.025070959 0 0.173772585 3.35E-18 0.105750722 0.021589134  
 1.35E-17 0.095822534 0.061138753 0.156961287  
 TCGA-FP-7735-11 0.104993108 0.021038324 0.047411595 0 6.13E-21 0 4.76E-18 0  
 1.68E-20 0 0.000773287 0.000705226 1.39E-17 0 0.104999142 0.14580302  
 2.78E-17 0.009325098 0.021797984 0 0.077178012 0 0.006994852 0  
 0.490990488 0 0.004184892 0.530802387 0.115965856 7.49E-19 0.041497828  
 6.95E-19 0.000905158 0.0044471 1.11E-19 0.014671042 0.007916485 0  
 0.052894939 0 0 1.44E-18 0.117315701 0.059856254 0.049376115 3.35E-18  
 0.043859677 0.003164111 3.94E-17 0.208329399 0 0 0.187808208 0 0  
 0.055854775 7.5E-19 0 0.005831743 0.533120897 7.07E-18 0.03880716  
 2.31E-18 9.56E-19 0.002579558 0.294603412 0.29718297  
 TCGA-FP-7829-01 0.032955294 0.001241254 0.03209917 0 0.030674843 1.99E-20  
 4.87E-19 2.81E-18 0 9.82E-20 2.94E-19 2.86E-20 5.66E-19 0 0.06112806  
 0.002816374 0.015168254 0.001466696 0 0.006914648 0.03955168 0  
 0.608180724 0 0.018638958 0 0.003082303 0.064794414 0.284769223  
 0.074665254 0.019073484 0.037381272 0.030147637 0.0239172 0 0.002589262  
 0.001615534 0.007034207 0.072066234 0.021549668 0.007849472 0 0.135738097  
 0.026299547 0 0 0.0000468 0.002279276 0 0.069492193 0 0.001216755  
 0.105122658 0.006560101 1.73E-18 0 0 0.052164273 0 0.181421418  
 1.83E-18 0.081736508 0.10341726 0 0.036283112 0.029715946 0.065999058  
 TCGA-FP-7829-11 0.031274609 0.064402692 0.064799586 0 0.040397131 0  
 1.13E-18 0 0 0 2.08E-18 0 0 0.067874563 0.126304816 0  
 1.85E-19 0.009300802 0.003325624 0.109174973 0 0.219202355 2.67E-19  
 0.554831618 1.66E-18 0.005155417 0.541271401 0.246035497 0.101887757  
 0.068284565 1.14E-18 0.004545855 0.003244786 0 0.01383707 0.006963369  
 2.01E-17 0.007179528 0.003618929 0 1.44E-18 0.010109585 0.075390431  
 0.032049103 0 0.02237257 0.006030145 3.78E-17 0.058031048 2.59E-17  
 3.31E-17 0.196187716 5.6E-20 9.69E-20 0.00130631 0 0.090886655 0.010388064  
 0.507244299 0 0.00421436 0 4.87E-18 0.006237179 0.364204641 0.370441821  
 TCGA-FP-7916-01 0.462062701 2.38E-19 0.019730369 0.224133914 0.030252077  
 0.015644102 0.067399554 3.29E-21 8.35E-19 1.53E-20 0.000135745 0.136355638

|  |             |                 |             |                 |             |                 |
|--|-------------|-----------------|-------------|-----------------|-------------|-----------------|
|  | 0.182258145 | 0.025063384     | 0.077677749 | 0.059837111     | 0.04507545  | 0.004891183     |
|  | 4.05E-19    | 0.022479911     | 0.046057149 | 0.010207117     | 0.525820941 | 0               |
|  | 0.110318804 | 0.022752533     | 0.001289606 | 0.146063639     | 0           | 0.042261396     |
|  | 0.027144402 | 0.043291577     | 0.053219276 | 0.021868567     | 0.010624076 | 0.006311619     |
|  | 0           | 0.058478354     | 0.029778228 | 0.021324903     | 0.018382967 | 0               |
|  | 0           | 0.025689881     | 3.49E-19    | 0.013959792     | 0.002221876 | 8.33E-19        |
|  | 0           | 0.024734338     | 5.62E-20    | 0.087208911     | 0.061958654 | 0.053051962     |
|  | 0           | 3.46E-18        | 0           | 0.020749522     | 0           | 0.329479437     |
|  | 0.023056714 | 0.060502385     | 0.085590428 | 0               | 0.3103168   | 0.078187976     |
|  | 0.388504777 | TCGA-FP-7998-01 | 0.481864473 | 2.2E-19         | 0.061736129 | 0.223175057     |
|  | 0.092121283 | 0.032577392     | 0.122959006 | 0.001704341     | 0           | 0               |
|  | 6.18E-20    | 0.242065927     | 0.280906288 | 0.104441318     | 0.182499414 | 0.037727848     |
|  | 0.098939799 | 0               | 6.7E-19     | 0.042045728     | 0.08696734  | 0.01156785      |
|  | 0.295000357 | 7.73E-19        | 0.204272188 | 7.47E-19        | 0.002656309 | 0.136468176     |
|  | 0.148413838 | 0.014648407     | 0.039643484 | 0.112409405     | 0.104592959 | 0.042767424     |
|  | 0.012905294 | 0.005561094     | 0.007265653 | 0.018090912     | 0.025785415 | 0.025477222     |
|  | 0.029584299 | 1.8E-18         | 0           | 0.044953026     | 0           | 0.013197138     |
|  | 0.000527397 | 1.28E-22        | 0           | 0.030633461     | 3.85E-18    | 0.121875459     |
|  | 0.147051327 | 0.044351888     | 0           | 0               | 8.68E-19    | 0.006654679     |
|  | 0           | 0.25025583      | 0.038345196 | 0.044543942     | 0.149600845 | 0.006794922     |
|  | 0.450305267 | 0.145619764     | 0.595925031 | TCGA-FP-8099-01 | 0.18874376  | 0.00502875      |
|  | 0.016322376 | 0.071056386     | 0.05221104  | 0.000602994     | 0           | 0               |
|  | 0.016261042 | 0.008668019     | 7.36E-19    | 7.73E-19        | 1.06E-19    | 0               |
|  | 0.001299943 | 0.046155448     | 0.030602643 | 0.006065946     | 0           | 0.003393705     |
|  | 1.77E-18    | 0.00491821      | 0.583025522 | 5.84E-21        | 0.087192828 | 5.74E-18        |
|  | 0.001578658 | 0.046250505     | 0           | 0.062052314     | 0           | 0.020860788     |
|  | 0.025758992 | 0.016285003     | 0.006081782 | 0               | 0.005662852 | 1.03E-19        |
|  | 0.032992832 | 0.034053155     | 3.75E-20    | 0               | 0.015067169 | 1.31E-19        |
|  | 1.41E-18    | 0               | 0.000337665 | 0               | 0           | 0.045470167     |
|  | 0.015648618 | 0.004978908     | 0.131364662 | 0.021021838     | 1.7E-18     | 1.64E-19        |
|  | 1.9E-18     | 0.028138439     | 1.71E-20    | 0.19107191      | 0.004856558 | 0.051174155     |
|  | 0.034331597 | 0.001905902     | 0.070873914 | 0.046110789     | 0.116984703 | TCGA-FP-8209-01 |
|  | 0.369951198 | 0               | 0.062388974 | 0.543271834     | 0           | 0.015922088     |
|  | 0.151462802 | 0.01888368      | 0.005770938 | 5.63E-18        | 0.00183358  | 0.159748667     |
|  | 0.148417784 | 0               | 0.396556812 | 0.150296435     | 0.199733387 | 0               |
|  | 0.012346243 | 0.041472364     | 0.135341601 | 0.016619325     | 0.06270422  | 0               |
|  | 0.550339814 | 0.015812842     | 0.001814626 | 0.399724134     | 0.235425438 | 0               |
|  | 0.065761756 | 0.007099167     | 0.014328553 | 0.00744476      | 0.014776432 | 0.014591199     |
|  | 2.83E-19    | 0.183739255     | 0           | 0.036555543     | 0.025549029 | 3.62E-17        |
|  | 0           | 0.071436802     | 0.014346347 | 0.084665872     | 0.015305556 | 0               |
|  | 0           | 0.082260049     | 0           | 0.011007618     | 0.171466767 | 2.22E-19        |
|  | 0           | 0.063340735     | 3.47E-18    | 1.24E-20        | 4.93E-19    | 0.358180156     |
|  | 3.45E-20    | 0               | 0.019046295 | 2.93E-18        | 0.551613665 | 0.342840708     |
|  | 0.894454373 | TCGA-FP-8210-01 | 0.415737129 | 0               | 0.041676703 | 0.494051186     |
|  | 3.85E-17    | 0.014228121     | 0.106410518 | 0               | 0           | 4.8E-18         |
|  | 0           | 0.114846266     | 0.136089007 | 6E-19           | 0.310842864 | 0.154083138     |
|  | 0.138482705 | 0               | 0.004892056 | 0.048869311     | 0.145175623 | 0.014020514     |
|  | 0.376282202 | 0               | 0.385623925 | 0.025274525     | 0.00104841  | 0.380009138     |
|  | 0.36054052  | 0.03121305      | 0.085268038 | 0.020072466     | 0.025656441 | 0.017000266     |
|  | 0.003378248 | 0.023452389     | 1.13E-18    | 0.199621746     | 0.038260447 | 0.057145862     |
|  | 0.005109162 |                 |             |                 |             |                 |

|                 |             |             |             |             |             |             |             |                        |
|-----------------|-------------|-------------|-------------|-------------|-------------|-------------|-------------|------------------------|
|                 | 3.57E-17    | 0           | 0.082999988 | 0.000990044 | 0.090493081 | 0.007901371 | 0           | 8E-18                  |
|                 | 0.079180541 | 0           | 0.004439368 | 0.131207861 | 0.001720672 | 0           | 0.060906849 |                        |
|                 | 1.98E-18    | 0.015164536 | 0           | 0.311134916 | 0           | 0           | 0.046639883 | 1.33E-18 0.466898102   |
|                 | 0.265399774 | 0.732297876 |             |             |             |             |             |                        |
| TCGA-FP-8211-01 | 0.074992928 | 1.05E-20    | 7.84E-18    | 0.029603596 | 0.00995902  | 0.00790027  |             |                        |
|                 | 0.0063168   | 7.26E-19    | 0.012590278 | 0.027557061 | 0.002277255 | 0.036912811 |             |                        |
|                 | 0.068746158 | 0           | 0.050902454 | 0           | 0.03390386  | 0.011587327 | 0.000997591 |                        |
|                 | 0.002892969 | 0.002867567 | 0.003461638 | 0.662418189 | 4.43E-20    | 4.54E-18    | 0           |                        |
|                 | 0.001526197 | 0.063038233 | 0.095782512 | 0.103813165 | 0.005637173 | 0.003517713 |             |                        |
|                 | 0.007042237 | 0.006803974 | 0.004258793 | 0.000398059 | 0           | 0.002696543 | 0.076482249 |                        |
|                 | 0.024435802 | 0           | 0           | 1.02E-17    | 0.006370226 | 0           | 0           | 0.000683734 1.57E-19 0 |
|                 | 0.051878825 | 4.23E-19    | 0.007070043 | 0.068363948 | 0.004090435 | 3.59E-21    | 0           |                        |
|                 | 1.89E-20    | 0.051143207 | 0           | 0.247308968 | 1.62E-19    | 0.14122994  | 0.042632981 | 0                      |
|                 | 0.053765014 | 0.001433783 | 0.055198797 |             |             |             |             |                        |
| TCGA-FP-8631-01 | 0.038093769 | 0.002613701 | 0.074274315 | 6.43E-19    | 1.07E-17    | 1.25E-19    | 0           |                        |
|                 | 0           | 0.022300275 | 2.98E-19    | 0.001054087 | 0           | 3.96E-18    | 3.22E-18    | 0.001195416            |
|                 | 1.01E-17    | 3.06E-18    | 0.006617883 | 0.002788268 | 5.08E-19    | 0.011966645 | 0.001533172 |                        |
|                 | 0.663743323 | 5.39E-20    | 2.01E-17    | 0           | 1.03E-19    | 0.156938795 | 0           | 0.076406862            |
|                 | 0.008672699 | 0.000622809 | 0.003642329 | 0.012844157 | 0           | 0.001467216 | 0.001958752 |                        |
|                 | 5.55E-18    | 0.049470183 | 0.063865192 | 3.06E-18    | 0           | 0.097258479 | 0.00639114  | 0                      |
|                 | 1.97E-18    | 0.000845991 | 0           | 3.16E-18    | 0.024480158 | 0           | 9.54E-19    | 0.087250503            |
|                 | 0.005676202 | 4.51E-19    | 1.35E-17    | 0           | 0.041959286 | 1.08E-19    | 0.280543427 | 0                      |
|                 | 0.028026063 | 0.088572015 | 0           | 0.001437321 | 0.007290173 | 0.008727494 |             |                        |
| TCGA-FP-A4BE-01 | 0.27087806  | 4.04E-19    | 0           | 0.079789789 | 0.156206409 | 0.031719266 |             |                        |
|                 | 0.012381204 | 0.002612874 | 0           | 0           | 0.011532169 | 0.028937584 | 0.081245504 |                        |
|                 | 0.01286944  | 0.061790128 | 0           | 0.051790059 | 0.000233887 | 2.25E-18    | 0.021743186 |                        |
|                 | 0.002613871 | 1.39E-18    | 0.53246804  | 0           | 0           | 0           | 0.002423028 | 0.023254679            |
|                 | 0.072532468 | 0.054153462 | 0.005094324 | 0.077976989 | 0.068440775 | 0.039113813 |             |                        |
|                 | 0.007142503 | 0           | 0.001366521 | 0.005730637 | 0.07577424  | 0.005540625 | 1.27E-18    |                        |
|                 | 4.42E-18    | 0.059799029 | 0.007384577 | 3.76E-19    | 0           | 0           | 0           | 1.14E-18 0.058491706   |
|                 | 1.21E-17    | 0.077229108 | 0.038763283 | 0.023437227 | 1.42E-18    | 9.08E-18    | 0.007146689 |                        |
|                 | 0.028604887 | 3.87E-20    | 0.240631253 | 0.005723356 | 0.16222085  | 0.205287307 |             |                        |
|                 | 0.015086282 | 0.145468617 | 0.001306936 | 0.146775553 |             |             |             |                        |
| TCGA-FP-A4BF-01 | 0.391787657 | 0.004586162 | 0.124766236 | 0.129747747 | 0.137844762 |             |             |                        |
|                 | 0.02842842  | 0.049872446 | 0           | 0           | 0.01369853  | 0.018268095 | 0.150946696 |                        |
|                 | 0.200903669 | 0.043964575 | 0.070414943 | 0.04656014  | 0.016624832 | 0.007513529 | 0           |                        |
|                 | 0.035881641 | 0           | 2.71E-19    | 0.556554836 | 3.83E-20    | 0.051375989 | 2.95E-18    | 0.000693618            |
|                 | 0.071079694 | 0.195159604 | 0.052304787 | 0.004609295 | 0.112040398 | 0.103896656 |             |                        |
|                 | 0.016830659 | 0.007224655 | 9.07E-20    | 0.007456661 | 0.023917832 | 0.061348265 |             |                        |
|                 | 0.036338885 | 0.027124624 | 0           | 0.125008129 | 1.35E-19    | 0           | 0.000807217 | 0.001546744            |
|                 | 0           | 0.003834963 | 0.051038889 | 0           | 0.099605024 | 0.095366485 | 0.03905541  | 0                      |
|                 | 0.009257406 | 0.034348328 | 0           | 0.225289798 | 0.013728025 | 0.190344835 | 0.107713262 |                        |
|                 | 0.000311798 | 0.311200482 | 0.027981076 | 0.339181558 |             |             |             |                        |
| TCGA-FP-A8CX-01 | 0.141749585 | 7.12E-19    | 2.21E-18    | 0.079489177 | 0.017594448 | 0.000368153 |             |                        |

|                 |             |             |             |             |             |             |             |             |  |
|-----------------|-------------|-------------|-------------|-------------|-------------|-------------|-------------|-------------|--|
| 0               | 1.08E-19    | 0.020908785 | 0.030340323 | 0.004539589 | 0.001481553 | 0.017649621 |             |             |  |
| 7.03E-19        | 0.018681273 | 0           | 0.036915069 | 0           | 6.2E-19     | 0.006307651 | 0.006296915 |             |  |
| 0.006372578     | 0.654086922 | 0           | 0           | 0           | 0.013803457 | 0.036950399 | 0.0529399   |             |  |
| 0.063045523     | 0.006083504 | 0.026912536 | 0.015194041 | 0.038022761 | 0.005767107 |             |             |             |  |
| 0.002791586     | 0           | 0.030209238 | 0.069481025 | 0.010047539 | 0           | 0           | 0           | 0.010049584 |  |
| 1.79E-20        | 3.44E-20    | 0.000109332 | 0.000332629 | 5.77E-18    | 0.077376052 | 0           | 0.027851104 |             |  |
| 0.028597376     | 0.049468667 | 0           | 4.66E-19    | 5.99E-19    | 0.046288982 | 0           | 0.172239976 | 0           |  |
| 0.101617135     | 0.045387682 | 0           | 0.084442155 | 0.003148458 | 0.087590612 |             |             |             |  |
| TCGA-FP-A9TM-01 | 0.166109728 | 0           | 0           | 0.783668674 | 0           | 0.020847275 | 0.025750817 |             |  |
| 1.39E-19        | 2.96E-20    | 6.68E-18    | 0.004266133 | 8.83E-20    | 0.030008111 | 0           | 0.035040142 | 0           |  |
| 0.180052307     | 0.008735126 | 1.57E-21    | 0.001858262 | 1.34E-18    | 0           | 0.58500997  |             |             |  |
| 0.002254747     | 1.49E-19    | 1.44E-18    | 7.04E-19    | 0.017806544 | 0.11054041  | 0.059487475 | 0           |             |  |
| 1.05E-20        | 0           | 0.011144324 | 0.012628435 | 0.002858861 | 0           | 0.322564608 | 0.029160178 |             |  |
| 0               | 1.76E-18    | 0           | 6.94E-18    | 0           | 7.8E-19     | 0.135297765 | 0.000496664 | 1.42E-19    |  |
| 1.43E-17        | 0.010713532 | 0           | 0.026799574 | 6.36E-19    | 0.022267522 | 0           | 0           | 0.096790182 |  |
| 0.030817485     | 0           | 0.238541498 | 2.76E-18    | 0.033226415 | 0.085859084 | 0           | 0.532103581 |             |  |
| 7.46E-19        | 0.532103581 |             |             |             |             |             |             |             |  |
| TCGA-HF-7131-01 | 0.116551308 | 7.08E-19    | 0           | 0.016025928 | 0.008769545 | 0.003923566 | 0           |             |  |
| 5.85E-19        | 2.05E-19    | 0.013307833 | 0.000930169 | 0.014204807 | 0.031395542 | 0           |             |             |  |
| 0.08949769      | 7.26E-19    | 0.017600054 | 0.002977191 | 1.46E-20    | 0.007002573 | 0.05438095  |             |             |  |
| 0.015924516     | 0.707801962 | 0.00220594  | 0           | 0           | 0.013253589 | 0.101223271 |             |             |  |
| 0.164802182     | 0.100193502 | 0.024297643 | 0.010052769 | 0.01033095  | 0.044528438 |             |             |             |  |
| 0.005727609     | 0.008340999 | 9.28E-18    | 0           | 0.064686182 | 0.011519381 | 0.020839608 |             |             |  |
| 3.19E-18        | 6.75E-18    | 0.022707135 | 0           | 0           | 0           | 0.01454426  | 0           | 0.044975338 |  |
| 4.47E-18        | 0.024231591 | 0.079215089 | 0.024058489 | 9E-19       | 0           | 1.93E-19    | 0.056910679 |             |  |
| 6.65E-18        | 0.203279867 | 2.95E-22    | 0.050974039 | 0.068188611 | 0.006945279 | 0.069548047 |             |             |  |
| 0.027190475     | 0.096738522 |             |             |             |             |             |             |             |  |
| TCGA-HF-7132-01 | 0.250854969 | 0           | 0.019528341 | 0.230663172 | 0.012653091 | 0.020537738 |             |             |  |
| 0.057489621     | 0.002903474 | 0           | 0.009315169 | 0.0000575   | 0.053476472 | 0.116415355 |             |             |  |
| 0.006711157     | 0.096719274 | 0.017193984 | 0.072763986 | 0.007050465 | 0           | 0.022079255 |             |             |  |
| 0.016700456     | 0.02116341  | 0.568703611 | 0.000920421 | 0.061466661 | 0.015222388 |             |             |             |  |
| 0.003501366     | 0.105099762 | 0.160189797 | 0.056339452 | 0.005879682 | 0.036724858 |             |             |             |  |
| 0.043201378     | 0.020001906 | 0.011996952 | 0.000994783 | 1.61E-19    | 0.090552275 |             |             |             |  |
| 0.049475249     | 0.016258556 | 0.009519553 | 0           | 0           | 0.012893144 | 0           | 0.008436358 |             |  |
| 0.000731662     | 2.61E-19    | 2.02E-19    | 0.033911341 | 0           | 0.027505662 | 0.002570342 |             |             |  |
| 0.039998522     | 2.2E-19     | 0           | 1.54E-19    | 0.046071208 | 0           | 0.262840894 | 0.016575427 |             |  |
| 0.062361178     | 0.057154089 | 0           | 0.259018097 | 0.039083558 | 0.298101656 |             |             |             |  |
| TCGA-HF-7133-01 | 0.203373328 | 0.000618761 | 0.019808553 | 0.06961025  | 0.055066052 |             |             |             |  |
| 0.011341833     | 0.000875262 | 0.001367338 | 7.25E-19    | 2.57E-18    | 1.18E-22    | 0.001697743 |             |             |  |
| 0.03861405      | 0           | 0.122382424 | 0           | 0.021962002 | 0.008823392 | 0.008412961 |             |             |  |
| 0.038759696     | 0.028137234 | 0.003719862 | 0.570838768 | 0.000339895 | 0.017852857 |             |             |             |  |
| 0.013564595     | 0.003028398 | 0.05620423  | 0.507077953 | 0.051465337 | 0.014446806 |             |             |             |  |
| 0.042509128     | 0.049257987 | 0.020029718 | 0.007819427 | 0           | 0.002121817 | 0.019599616 |             |             |  |
| 0.059601058     | 0.045675335 | 0.047568864 | 0           | 4.79E-18    | 0.013274747 | 0.005618278 |             |             |  |

|                 |             |             |             |             |             |             |             |             |             |
|-----------------|-------------|-------------|-------------|-------------|-------------|-------------|-------------|-------------|-------------|
|                 | 8.58E-22    | 0.003732113 | 0.004986396 | 0           | 0.008514607 | 0.024661977 | 0.02743189  |             |             |
|                 | 0.002536087 | 0.030440913 | 0           | 0           | 0.009175144 | 0.039936953 | 1.84E-18    | 0.297332839 |             |
|                 | 0.03152259  | 0.070250794 | 0.123014806 | 0           | 0.145359136 | 0.023304426 | 0.168663562 |             |             |
| TCGA-HF-7134-01 | 0.092857418 | 7.5E-19     | 2.49E-19    | 0.0315393   |             | 0.065365357 | 0.003454726 |             |             |
|                 | 0.00857872  | 0           | 0           | 6.84E-19    | 0           | 7.35E-19    | 0.003420682 | 3.61E-19    | 0.042215102 |
|                 | 0.017258734 | 8.68E-19    | 4.6E-19     | 0.002216148 | 0.111546863 | 0.002856486 | 0.572511797 |             |             |
|                 | 3.38E-20    | 4.95E-18    | 0           | 0.003554982 | 0.059229111 | 0.077581605 | 0.067741715 |             |             |
|                 | 0.049186636 | 0.008555066 | 0.007962225 | 0.02597238  |             | 0.002817529 | 0.001385683 |             |             |
|                 | 9.87E-20    | 0.013552981 | 0.038898923 | 0.023353842 | 0.002527804 | 0           | 4.84E-18    |             |             |
|                 | 0.050897368 | 2.47E-20    | 0           | 0.001060659 | 0.010086981 | 2.47E-18    | 0.018020848 |             |             |
|                 | 0.001406281 | 0.01036147  | 0.140614079 | 0.033842664 | 5.96E-19    | 0.003046351 | 0           |             |             |
|                 | 0.048628353 | 0           | 0.114599097 | 0.009872804 | 0.079421899 | 0.052616588 | 0           |             |             |
|                 | 0.040399543 | 0.055773431 | 0.096172974 |             |             |             |             |             |             |
| TCGA-HF-7136-01 | 0.091475191 | 0.000874384 | 0.082815974 | 0           | 0.054488513 | 0.000810767 |             |             |             |
|                 | 0           | 1.05E-18    | 0           | 0           | 0.002084463 | 1.09E-18    | 0           | 0           | 0.016201441 |
|                 | 0           | 0           | 0           | 0.007969348 | 0.002044833 | 0.596402634 | 0           | 0.059674901 | 0           |
|                 | 0.00672605  | 0.103760307 | 0.012645139 | 0.051591923 | 0.006861143 | 0.000756139 |             |             |             |
|                 | 0.020994256 | 0.003673221 | 0.007853306 | 0.0000961   | 1.09E-18    | 2.22E-18    | 0.026193355 |             |             |
|                 | 0.122057243 | 0           | 3.28E-18    | 0           | 0.004195654 | 0           | 0.002355169 | 0.003032567 |             |
|                 | 0.001231197 | 0           | 0           | 0.008812222 | 0.024136129 | 0.177345348 | 0.005326607 | 0           | 0           |
|                 | 3.29E-18    | 0.031063676 | 0           | 0.207270393 | 0           | 0.037628492 | 0.0669009   | 1.03E-20    |             |
|                 | 0.00792365  | 0.034259316 | 0.042182966 |             |             |             |             |             |             |
| TCGA-HF-A5NB-01 | 0.136451593 | 0           | 6.97E-18    | 0.016763337 | 0.198875079 | 0.001110276 |             |             |             |
|                 | 1.16E-17    | 7.46E-18    | 0.007230144 | 3.94E-18    | 0.003415722 | 1.63E-20    | 0.007422418 |             |             |
|                 | 1.04E-17    | 0.003043989 | 0           | 0.012487223 | 0.013343061 | 9.18E-18    | 0.00017281  | 0           | 0           |
|                 | 0.617292324 | 0           | 1.06E-17    | 3.42E-18    | 0.002059426 | 9.87E-19    | 1.48E-18    | 0.080369955 | 0           |
|                 | 0.004807843 | 0.007513829 | 0.015434649 | 0.010966725 | 0           | 6.02E-19    | 2.09E-19    |             |             |
|                 | 0.037124585 | 0.020653374 | 1.9E-17     | 0           | 0           | 3.75E-19    | 0.0018514   | 0.000359702 |             |
|                 | 0           | 1.44E-17    | 0.02777339  | 0           | 0.004140844 | 0.029662871 | 0.013555476 | 3.65E-18    |             |
|                 | 2.72E-17    | 0.011259867 | 0.041565978 | 3.44E-18    | 0.285980614 | 0           | 0.110415408 |             |             |
|                 | 0.085203534 | 2.39E-18    | 0.021807143 | 5.29E-18    | 0.021807143 |             |             |             |             |
| TCGA-HJ-7597-01 | 0.161079087 | 0           | 2.43E-18    | 0.107765947 | 0.102403893 | 0.006515177 |             |             |             |
|                 | 4.75E-19    | 6.3E-19     | 0           | 4.19E-18    | 0.012738753 | 0.024907493 | 0.033842637 | 0.008515419 |             |
|                 | 0.003686639 | 2.94E-18    | 0.08658649  | 0.001349998 | 3.21E-19    | 0.00014322  | 8.63E-19    |             |             |
|                 | 9.85E-19    | 0.494196218 | 0           | 4.86E-18    | 3.36E-19    | 4.4E-20     | 1.13E-18    | 0.00922035  |             |
|                 | 0.055043001 | 0.005044881 | 0           | 0.005507492 | 0.001319283 | 0.008251644 | 2.5E-19     | 0           |             |
|                 | 0.045235275 | 0.045221649 | 0.089746486 | 1.39E-18    | 0           | 0           | 0.004841536 | 2.43E-21    |             |
|                 | 0.009786792 | 0.000399789 | 4.2E-19     | 1.46E-18    | 0.044589694 | 0.008399653 | 0.081204996 |             |             |
|                 | 0.026022635 | 0.011226383 | 0           | 0           | 0.011925511 | 0.008483409 | 0           | 0.326413892 | 0           |
|                 | 0.151477001 | 0.104337026 | 6.94E-18    | 0.094045537 | 2.86E-18    | 0.094045537 |             |             |             |
| TCGA-HU-8238-01 | 0.165517438 | 0           | 5.02E-18    | 0.086758867 | 0.049563411 | 0.00224642  |             |             |             |
|                 | 1.63E-18    | 9.05E-19    | 0           | 7.68E-19    | 0.006303519 | 0           | 0.015794901 | 1.74E-18    | 0.075598503 |
|                 | 0           | 0.013778372 | 0.015558727 | 0.015179775 | 0.012095376 | 0.039737831 | 0.00590985  |             |             |
|                 | 0.687435814 | 0.002647462 | 0           | 0.012088275 | 0.008887476 | 0.065304992 | 0.336098868 |             |             |

|                 |             |             |             |             |             |             |             |             |             |   |  |
|-----------------|-------------|-------------|-------------|-------------|-------------|-------------|-------------|-------------|-------------|---|--|
| 0.118029287     | 0.026018212 | 0.021692318 | 0.031609638 | 0.029216929 | 0.020404136 |             |             |             |             |   |  |
| 0.007865107     | 2.21E-19    | 0.050422863 | 0.122321461 | 0.031083534 | 0.015994385 | 0           |             |             |             |   |  |
| 1.07E-18        | 0.029638918 | 0           | 0.002451482 | 0.002094078 | 0.006450132 | 0           | 0.045363598 |             |             |   |  |
| 1.45E-17        | 0.025535397 | 0.036601201 | 0.027058969 | 0           | 3.13E-18    | 0.016643705 |             |             |             |   |  |
| 0.07622795      | 1.92E-19    | 0.232332708 | 4.11E-18    | 0.086965074 | 0.115061316 | 0           |             |             |             |   |  |
| 0.112870043     | 0.019868915 | 0.132738958 |             |             |             |             |             |             |             |   |  |
| TCGA-HU-8238-11 | 0.069120103 | 0.004617901 | 1.43E-17    | 0.077684433 | 0.097001915 | 0           |             |             |             |   |  |
| 1.42E-18        | 0           | 0.001938528 | 0           | 0.001827653 | 1.2E-19     | 0.030816347 | 0           | 0.034723782 |             |   |  |
| 0               | 0.043884298 | 0           | 0.001008973 | 0           | 7.09E-20    | 1.49E-20    | 0.575756902 | 0           | 0           | 0 |  |
| 0.048546955     | 0.046011709 | 0.094653671 | 0.059284706 | 0.005711851 | 0.004281972 |             |             |             |             |   |  |
| 0.012346416     | 0.030495507 | 0.001234352 | 0.001024047 | 1.44E-18    | 0.05551845  |             |             |             |             |   |  |
| 0.032939603     | 0.006144691 | 4.26E-18    | 2.94E-18    | 7.65E-18    | 0.000822323 | 0           | 0           |             |             |   |  |
| 0.001762043     | 0           | 0           | 0.088952389 | 0.027875032 | 0.127014983 | 0.01063844  |             |             |             |   |  |
| 0.060916259     | 5.91E-19    | 0           | 0           | 0.026035302 | 0           | 0.142933812 | 1.39E-18    | 0.040171916 |             |   |  |
| 0.003111954     | 1.14E-18    | 0.055467172 | 0.00230895  | 0.057776122 |             |             |             |             |             |   |  |
| TCGA-HU-8243-01 | 0.061622374 | 0.000294348 | 0           | 0.008951357 | 0.143543217 | 5.03E-22    |             |             |             |   |  |
| 3.24E-18        | 0           | 0           | 9.62E-19    | 0           | 7.41E-21    | 2.8E-20     | 0           | 0.010495912 | 3.21E-18    |   |  |
| 0.002836535     | 0.012479921 | 0           | 0           | 0.061082764 | 8.13E-19    | 0.521535431 | 0           |             |             |   |  |
| 5.15E-19        | 1.1E-18     | 0.010677404 | 0.02329531  | 0.007675505 | 0.029416943 | 0.035055457 |             |             |             |   |  |
| 0.00603834      | 0.00882771  | 0.017431351 | 0.005359965 | 0.000917786 | 0.002414945 |             |             |             |             |   |  |
| 0.015423848     | 0.097324228 | 0.006228539 | 0           | 0           | 0           | 0.03797867  | 0.0000848   | 0           |             |   |  |
| 0.00208907      | 0.005678495 | 2.96E-18    | 0.083539262 | 0.013286803 | 0.032113352 |             |             |             |             |   |  |
| 0.055758482     | 0.012614488 | 0           | 2.72E-18    | 0.006356166 | 0.035712049 | 0           | 0.247511432 |             |             |   |  |
| 0               | 0.137460122 | 0.043450268 | 4.76E-19    | 0.017352104 | 0.030688556 | 0.04804066  |             |             |             |   |  |
| TCGA-HU-8244-01 | 0.007131268 | 0           | 2.87E-18    | 0.01123152  | 0.055857457 | 0.000714823 | 0           |             |             |   |  |
| 0               | 0           | 0           | 0.001246494 | 0           | 0           | 9.7E-18     | 0.030823511 | 5.64E-19    | 0.014091438 |   |  |
| 0.000303167     | 0           | 6.62E-21    | 0           | 0           | 0.624073028 | 3.74E-19    | 0           | 0           | 0.005340862 |   |  |
| 0.006034153     | 0.100575677 | 0.090356915 | 0.001090711 | 0           | 0.000746502 | 0.013577721 |             |             |             |   |  |
| 0.006072048     | 0.000888027 | 0           | 0.005118554 | 0.074324528 | 0           | 5.79E-18    | 0           |             |             |   |  |
| 1.26E-17        | 0           | 0.004123889 | 0.00240795  | 0.000478725 | 0.001544257 | 2.8E-18     |             |             |             |   |  |
| 0.041599338     | 0.011885711 | 0.009183903 | 0.06034013  | 0.020112343 | 2.6E-19     | 0           |             |             |             |   |  |
| 0.006857998     | 0.036132321 | 1.68E-18    | 0.179768583 | 0           | 0.138754221 | 0.0954658   | 0           |             |             |   |  |
| 0.012565217     | 0           | 0.012565217 |             |             |             |             |             |             |             |   |  |
| TCGA-HU-8249-01 | 0.064495314 | 6.64E-20    | 0           | 0.023142254 | 0.105933524 | 0.015285885 |             |             |             |   |  |
| 0.005829208     | 0           | 0.011132915 | 0.009059709 | 0.005407926 | 0.008687    | 0.033560093 |             |             |             |   |  |
| 0.004736758     | 0.033007709 | 1.18E-18    | 0.015759261 | 0.013598262 | 1.37E-18    | 0.004553273 |             |             |             |   |  |
| 0.036643853     | 5.1E-18     | 0.509235104 | 0           | 2.86E-18    | 0           | 0.001037781 | 0.025192845 |             |             |   |  |
| 0.281163714     | 0.046286606 | 0.024628607 | 0.000917229 | 0.00620637  | 1.27E-19    |             |             |             |             |   |  |
| 9.03E-20        | 0           | 0           | 0.004066155 | 0.118852889 | 0.055310202 | 5.22E-18    | 5.44E-18    |             |             |   |  |
| 5.57E-20        | 0.029001088 | 1.03E-18    | 0           | 0.001625486 | 3.94E-18    | 1.77E-18    | 0.093216439 | 0           |             |   |  |
| 0.15831202      | 0.133114783 | 0.013286554 | 0           | 0           | 0.016630196 | 0.082692103 | 3.6E-18     |             |             |   |  |
| 0.230217544     | 0.024042069 | 0.250472467 | 0.10238327  | 3.44E-18    | 0.024866504 |             |             |             |             |   |  |
| 0.018321927     | 0.04318843  |             |             |             |             |             |             |             |             |   |  |
| TCGA-HU-8602-01 | 0.298001717 | 1.7E-19     | 1.74E-18    | 0.056793629 | 0.194969406 | 0.038302374 |             |             |             |   |  |

|                 |             |             |             |             |             |             |             |
|-----------------|-------------|-------------|-------------|-------------|-------------|-------------|-------------|
| 0               | 0.002087443 | 1.45E-18    | 5.05E-18    | 0           | 0.005100779 | 0.070632377 | 5.88E-19    |
| 0.110381221     | 0           | 0.033520941 | 0.01061136  | 0           | 0.026206233 | 0.025972    | 8.44E-18    |
| 0.418382343     | 5.44E-19    | 0           | 0           | 0.002048923 | 0.002758296 | 0.254227747 | 0.072137674 |
| 0.009453463     | 0.067835699 | 0.066928344 | 0.010704592 | 0.010210808 | 4.27E-20    |             |             |
| 1.44E-18        | 0.007787385 | 0.051757657 | 0.004788037 | 0.046937749 | 0           | 0           | 0.02726031  |
| 0.000340168     | 0           | 0.00015288  | 0.014423122 | 0           | 0.008459861 | 0.036231156 |             |
| 0.077071208     | 0.054549428 | 0.00481866  | 1.15E-18    | 0.004481353 | 0.020100185 |             |             |
| 0.010355573     | 1.93E-19    | 0.307365606 | 0.018805753 | 0.267710592 | 0.18783143  |             |             |
| 0.025804742     | 0.153063641 | 0.012986    | 0.166049641 |             |             |             |             |
| TCGA-HU-8604-01 | 0.302192272 | 5.25E-22    | 0.103832997 | 0.139824704 | 0.15590758  |             |             |
| 0.015781311     | 0.031545307 | 2.75E-19    | 8.23E-19    | 6.74E-20    | 0.014320123 | 0.062447181 |             |
| 0.119634437     | 0.028507793 | 0.047527068 | 0           | 0.03563526  | 0           | 1.85E-18    | 0.015841489 |
| 0.058615512     | 2.6E-19     | 0.379499251 | 0           | 0.078912683 | 0           | 0.003278373 | 0.037681875 |
| 0.046882359     | 0.026125744 | 0.023633461 | 0.086944799 | 0.065861351 | 0.040329451 | 0           |             |
| 3.91E-19        | 0.002309441 | 0.030401025 | 0.085276145 | 0.009319454 | 0.010599763 |             |             |
| 5.52E-18        | 0.089068231 | 0.035794959 | 9.41E-19    | 0           | 0.000109349 | 0.001523478 |             |
| 0.004688606     | 0.055614568 | 0           | 0.081988214 | 0.122453494 | 0.052307211 | 0           |             |
| 4.22E-19        | 0.004651099 | 0.041141426 | 0.001376252 | 0.155189044 | 0           | 0.251457944 |             |
| 0.19667001      | 0           | 0.214580013 | 0.068764098 | 0.283344111 |             |             |             |
| TCGA-HU-8608-01 | 0.383340637 | 6.98E-20    | 0           | 0.231479935 | 0.16325184  | 0.054888555 |             |
| 0.054362722     | 0.018515764 | 1.03E-18    | 0           | 0           | 0.125507009 | 0.199293796 | 0.038434297 |
| 0.234170657     | 0.000499963 | 0.087251031 | 3.58E-19    | 1.17E-18    | 0.048131478 | 0.087667378 |             |
| 8.11E-19        | 0.41857098  | 2.03E-19    | 0           | 0           | 0.003417001 | 0.003916034 | 0.327845545 |
| 0.022950229     | 0.028208911 | 0.100611781 | 0.086590359 | 0.06187159  | 0.013101975 | 0           |             |
| 0.0000373       | 0.048690485 | 0.036547648 | 0.012665261 | 0.029178441 | 7.01E-19    | 0           |             |
| 0.053511689     | 0           | 0.003902287 | 5.15E-20    | 0.003006901 | 3.22E-18    | 0.084555303 |             |
| 0.029883879     | 0.13058612  | 0.134140264 | 0.067701058 | 0           | 0.053624553 | 0.011654526 |             |
| 0.025229736     | 5.68E-18    | 0.144355476 | 0.021915118 | 0.147209285 | 0.237751125 |             |             |
| 0.077085112     | 0.379688856 | 0.043833689 | 0.423522545 |             |             |             |             |
| TCGA-HU-8610-01 | 0.360382585 | 0           | 0.053900801 | 0.035761403 | 0.0168893   | 0.024417978 |             |
| 0.045282485     | 0.024358882 | 0.025851426 | 0.036953267 | 4.06E-20    | 0.008517136 |             |             |
| 0.020678895     | 0.007429834 | 0.208214295 | 0.027695235 | 0.025823993 | 0.003911341 | 0           |             |
| 0.043889927     | 0.173005613 | 0.014812242 | 0.580065821 | 0           | 0           | 1.91E-19    | 0.002486959 |
| 0.08969323      | 0.363687815 | 0.088532942 | 0.074236565 | 0.055251663 | 0.06047693  |             |             |
| 0.021912038     | 0.010591038 | 0.002770634 | 0.012025664 | 0.002685739 | 0.021871617 |             |             |
| 0.012761677     | 0.071979944 | 9.74E-18    | 1.8E-18     | 0.08704245  | 7.57E-21    | 0           | 0.000930773 |
| 0.000869069     | 0.004506947 | 0.048197649 | 0.015322152 | 0.017621087 | 0.146815912 |             |             |
| 0.00385495      | 0           | 0.023994566 | 0           | 0.063588076 | 0           | 0.149763402 | 0           |
| 0               | 0.074455508 | 0.180358834 | 0.086502806 | 0.26686164  |             |             |             |
| TCGA-HU-A4G2-01 | 0.156976247 | 1.3E-18     | 1.4E-18     | 5.06E-19    | 0.031413973 | 0.010642645 |             |
| 1.07E-18        | 1.95E-19    | 0           | 4.32E-18    | 0.016023425 | 0.021879128 | 0.040255062 | 0           |
| 0.066490584     | 4.37E-19    | 0.005073586 | 0.026733784 | 4.64E-18    | 0.006210035 | 0.160843409 |             |
| 0               | 0.570486668 | 0           | 1.46E-18    | 0           | 0.003198102 | 0.180954421 | 0.080615699 |
| 0.048923368     | 0.099181898 | 0.023002912 | 0.030701762 | 0.008189373 | 9.52E-19    |             |             |

|                 |             |             |             |             |             |             |             |             |             |
|-----------------|-------------|-------------|-------------|-------------|-------------|-------------|-------------|-------------|-------------|
|                 | 0.005529292 | 5.54E-19    | 0           | 0.087972673 | 2.22E-19    | 0           | 0           | 8.58E-18    | 0.074770761 |
|                 | 0.002469664 | 3.69E-20    | 0.00129297  | 0           | 5.36E-19    | 0.014120967 | 1.01E-18    | 0.036329415 |             |
|                 | 0.007162806 | 0.007567066 | 0           | 0           | 6.13E-18    | 0.032485994 | 0           | 0.332941541 |             |
|                 | 6.05E-18    | 0.116606803 | 0.188555164 | 2.4E-20     | 0.034061384 | 0.080421704 | 0.114483088 |             |             |
| TCGA-HU-A4G3-01 | 0.075100081 | 1.53E-20    | 3.83E-18    | 0.012278608 | 0.002191054 | 0.004068619 |             |             |             |
|                 | 1.01E-18    | 0           | 0.009523501 | 0.0000387   | 0.006380664 | 0           | 0.002978847 | 2.13E-18    |             |
|                 | 0.03500131  | 4.95E-20    | 0.013392975 | 0.008971328 | 0.00610867  | 0.000659599 |             |             |             |
|                 | 0.034985128 | 0.009728934 | 0.659424076 | 0.000938001 | 0           | 0.020417286 | 0.007828961 |             |             |
|                 | 0.090167763 | 0.032396965 | 0.097119291 | 0.023798641 | 0.007728723 | 0.00503756  |             |             |             |
|                 | 0.031157305 | 0.022815603 | 0.005374519 | 0           | 0.00596132  | 0.068796604 | 0.018920945 |             |             |
|                 | 0.000909225 | 4E-18       | 5E-18       | 0.019638836 | 0.006824958 | 2.95E-19    | 0.00011734  |             |             |
|                 | 0.003518585 | 0           | 0.017775148 | 0           | 0.004672982 | 0.029953284 | 0.024764911 |             |             |
|                 | 3.66E-19    | 6E-18       | 2.54E-18    | 0.046550836 | 5.26E-18    | 0.37205007  | 0           | 0.058270516 |             |
|                 | 0.055904615 | 0           | 0.038426185 | 0.017492564 | 0.055918749 |             |             |             |             |
| TCGA-HU-A4G3-11 | 0.051189915 | 0.016633672 | 0.01139295  | 1.62E-18    | 0           | 2.43E-18    | 0           |             |             |
|                 | 4.09E-18    | 4.45E-21    | 1.96E-17    | 0.006890198 | 0.009283929 | 2.71E-18    | 0           | 0.075417093 |             |
|                 | 0.154276042 | 7.99E-18    | 0.014689927 | 0.015193491 | 3.27E-19    | 0.045576677 | 0           | 0           | 0           |
|                 | 0.491239778 | 1.09E-19    | 0.001897419 | 0.424885694 | 0.0267094   | 0           | 0.030694849 | 0           |             |
|                 | 2.18E-18    | 9.49E-19    | 0.001149597 | 0.014155042 | 0           | 0           | 0.003774135 | 7.99E-19    | 0           |
|                 | 0           | 0.022292269 | 0.042576609 | 0           | 0.041680645 | 0.000296522 | 1.74E-17    | 0.20517727  |             |
|                 | 0           | 1.54E-17    | 0.102096032 | 0           | 2.23E-18    | 0.028134418 | 0           | 0           | 0           |
|                 | 0.007245194 | 0.011225968 | 0           | 0.007153366 | 0.276725063 | 0.283878429 |             |             |             |
| TCGA-HU-A4G6-01 | 0.079559416 | 0           | 5.95E-18    | 0.014116043 | 0.06502088  | 0.005535514 |             |             |             |
|                 | 2.69E-18    | 0           | 0           | 1.46E-17    | 0           | 1.84E-19    | 3.02E-19    | 2.84E-18    | 0.073062451 |
|                 | 0.007783546 | 0.021638426 | 0           | 0.000403859 | 7.57E-19    | 0.002587839 | 0.548597859 |             |             |
|                 | 7.69E-19    | 0           | 1.67E-17    | 0.001028597 | 0.028028706 | 0.086960653 | 0.055777989 |             |             |
|                 | 0.005285683 | 0.00222335  | 0.00179165  | 0.00354461  | 0.001532105 | 0.000600852 |             |             |             |
|                 | 6.05E-19    | 0.011652837 | 0.087544416 | 6.37E-18    | 0           | 9.33E-19    | 2.71E-17    | 0.002273162 |             |
|                 | 0.003362962 | 0.003901476 | 0.000757967 | 0.000205086 | 0           | 0.139306665 | 0.034313702 |             |             |
|                 | 0.010430794 | 0.020970536 | 0.012221225 | 2.54E-18    | 0           | 0           | 0.023644996 | 0           |             |
|                 | 0.276186035 | 0           | 0.136064885 | 0.152080045 | 0           | 0.014045521 | 3.79E-19    | 0.014045521 |             |
| TCGA-HU-A4G8-01 | 0.290237766 | 4.08E-19    | 0           | 0.229144965 | 0.066213792 | 0.030969888 |             |             |             |
|                 | 0.000610776 | 0.002917362 | 0           | 0           | 0.012338464 | 0.024363611 | 0.047885259 | 0           |             |
|                 | 0.022572056 | 4.91E-19    | 0.057149996 | 0.022577032 | 0           | 0.012340002 | 0.008639722 | 0           |             |
|                 | 0.521829914 | 3.5E-19     | 0           | 0           | 0           | 0.001126018 | 0.054024509 | 0.064963854 |             |
|                 | 0.005694674 | 0.026347382 | 0.037891696 | 0.006592033 | 0.006392001 | 0           | 2E-20       |             |             |
|                 | 0.070065986 | 0.058198155 | 0.017295788 | 7.33E-20    | 0           | 3.62E-18    | 0.00744261  | 0           |             |
|                 | 0.032263187 | 0.000108997 | 3.73E-19    | 8.92E-18    | 0           | 8.51E-18    | 0.035896425 | 0.044371824 |             |
|                 | 0.016985833 | 0.003376901 | 0           | 0.025321948 | 0.037269178 | 0           | 0.273096232 |             |             |
|                 | 0.017377394 | 0.096962797 | 0.166525294 | 1.75E-18    | 0.201003549 | 0.004319861 |             |             |             |
|                 | 0.20532341  |             |             |             |             |             |             |             |             |
| TCGA-HU-A4G9-01 | 2.64E-19    | 1.39E-18    | 0           | 0.031618629 | 1.6E-19     | 0.010596397 | 8.23E-19    |             |             |
|                 | 0.007646566 | 0.002059679 | 2.58E-18    | 0.006570164 | 1.14E-19    | 0.007975622 | 1.53E-18    |             |             |
|                 | 0.006368496 | 9.51E-19    | 0.032836675 | 0.011884524 | 3.55E-19    | 5.01E-20    | 1.63E-18    |             |             |

|                 |             |             |             |             |             |             |             |             |
|-----------------|-------------|-------------|-------------|-------------|-------------|-------------|-------------|-------------|
|                 | 0.005089038 | 0.539633676 | 1.77E-19    | 0           | 0           | 0.00132577  | 0.008525109 | 0.013012843 |
|                 | 0.059585909 | 0.001751827 | 0.00188008  | 0           | 0           | 0.008377401 | 0.012901728 | 0.000214405 |
|                 | 0           | 0.008836464 | 0.071247731 | 0           | 0           | 1.07E-18    | 1.29E-17    | 0           |
|                 | 0.004783196 | 0.000124252 | 0.00259921  | 0           | 0           | 0.018974571 | 0.039426159 | 0.0100227   |
|                 | 0.004019916 | 0.012969251 | 0.020843591 | 0.03239575  | 0.009862836 | 0.019476367 | 0           |             |
|                 | 0.210732083 | 0           | 0.071399255 | 0.165302017 | 0           | 0.041156834 | 1.51E-18    | 0.041156834 |
| TCGA-HU-A4GC-01 | 0.115256889 | 0           | 6.71E-19    | 0.000299522 | 0.028108755 | 0.004091442 | 0           |             |
|                 | 4.45E-18    | 4.26E-19    | 3.07E-19    | 0.015079008 | 0.00275084  | 0.023678656 | 0           | 0.018231735 |
|                 | 0.023059826 | 0.018742856 | 0.011676387 | 1.45E-18    | 0.001643975 | 0.000444132 |             |             |
|                 | 2.56E-19    | 0.640415465 | 0           | 6.85E-18    | 0           | 0.014214823 | 0.139283807 | 0.062099883 |
|                 | 0.059648395 | 0.007174245 | 0.010505378 | 0.007824442 | 0.014320722 | 0           | 0.004589994 |             |
|                 | 6.63E-18    | 0.004991399 | 0.088230267 | 0.020466717 | 0           | 1.85E-19    | 0           | 0.002778068 |
|                 | 2.48E-20    | 0           | 0.001149001 | 0.000218761 | 5.68E-18    | 0.034636636 | 0           | 0.037748624 |
|                 | 2.76E-18    | 0.015620746 | 0           | 0           | 1.6E-18     | 0.030835262 | 3.72E-18    | 0.382698267 |
|                 | 9.27E-18    | 0.14936844  | 0.104664872 | 2.77E-19    | 0.010278984 | 0.000222066 | 0.01050105  |             |
| TCGA-HU-A4GC-11 | 0.093792393 | 0.02849527  | 0.016471768 | 0           | 2.05E-18    | 0           | 1.52E-18    | 0           |
|                 | 2.12E-19    | 0           | 0.018302901 | 0.007961194 | 2.43E-18    | 0           | 0.101160119 | 0.154376619 |
|                 | 0.023837428 | 0.015516894 | 0.000458898 | 0.052441131 | 6.5E-18     | 0.001242726 | 0           |             |
|                 | 0.51903018  | 0           | 0.000283404 | 0.470512489 | 0.06319083  | 0           | 0.037385497 |             |
|                 | 2.03E-18    | 0.001611538 | 0.001922153 | 3.31E-19    | 0.01943653  | 0.008632553 | 1.7E-17     |             |
|                 | 0.019423534 | 0           | 0           | 9.93E-19    | 0.003155163 | 0.028515248 | 0.036857635 | 0           |
|                 | 0.061811019 | 0           | 3.35E-17    | 0.157827287 | 1.94E-17    | 0           | 0.128437222 | 0           |
|                 | 4.36E-18    | 6.13E-20    | 0.010361944 | 0.664764281 | 1.18E-17    | 0.027492162 | 0.026473393 |             |
|                 | 5.3E-19     | 0.005613395 | 0.29998329  | 0.305596685 |             |             |             |             |
| TCGA-HU-A4GD-01 | 0.004232637 | 1.7E-18     | 1.16E-17    | 0.03572027  | 0.0704203   | 0           |             |             |
|                 | 3.48E-18    | 2.69E-18    | 1.5E-18     | 1.14E-17    | 0.014151536 | 3.72E-19    | 0           | 0           |
|                 | 0.00295759  | 0           | 7.54E-19    | 0           | 0           | 0.572839667 | 0           | 7.03E-18    |
|                 | 0.00509493  | 0           | 0.058714362 | 1.65E-18    | 0           | 1.29E-19    | 0.010905194 | 0.009731402 |
|                 | 1.79E-18    | 0.014976041 | 0.104032734 | 0.014034059 | 2.01E-18    | 5.77E-18    | 7.08E-18    |             |
|                 | 3.13E-18    | 0.010883161 | 0.002602799 | 0.004828744 | 0           | 0           | 0.039616605 | 4.74E-18    |
|                 | 0.006828393 | 0           | 0.02221329  | 0           | 2.91E-18    | 0.018671599 | 0.043654168 | 3.6E-18     |
|                 | 0.192307696 | 4.92E-18    | 0.155427909 | 0.076031887 | 0           | 0.030301115 | 4.36E-18    |             |
|                 | 0.030301115 |             |             |             |             |             |             |             |
| TCGA-HU-A4GF-01 | 0.14623999  | 0           | 7.85E-18    | 0           | 0.051133792 | 0.006450399 | 0           | 9E-19       |
|                 | 0           | 1.4E-18     | 0.005850007 | 0           | 1.66E-19    | 0           | 0.03103386  | 9.04E-19    |
|                 | 0.012961124 | 7.15E-18    | 0.002533483 | 0.052661182 | 0           | 0.571266454 | 0           | 0           |
|                 | 3.11E-18    | 0.006346545 | 0.035911458 | 2.77E-19    | 0.065666137 | 0.032898205 | 0           |             |
|                 | 0.008032588 | 0.009949858 | 0.003044216 | 0.005757518 | 4.61E-18    | 0.002231195 |             |             |
|                 | 0.063253424 | 0.014564863 | 0.013029759 | 0           | 5.69E-18    | 0           |             |             |

|                 |             |             |             |             |             |             |             |             |
|-----------------|-------------|-------------|-------------|-------------|-------------|-------------|-------------|-------------|
| 0.011652302     | 0.022528196 | 0           | 0.004958918 | 0           | 0.006447674 | 0.648354821 | 0           | 0           |
| 5.34E-18        | 0.004358253 | 0           | 0.123100415 | 0.074847924 | 0.001648112 | 0.001714085 |             |             |
| 0.003068181     | 0.005982605 | 0.006410111 | 0.001360401 | 8.7E-19     | 0.00820832  |             |             |             |
| 0.014250041     | 0.015726078 | 3.08E-19    | 0           | 1.41E-17    | 7.05E-20    | 0           | 9.83E-19    | 0.000307701 |
| 0.003649394     | 3.79E-19    | 0.034774126 | 0.009101442 | 0.00675708  | 0.014139916 |             |             |             |
| 0.025340742     | 9.78E-19    | 3.93E-18    | 0.016822861 | 0.044063016 | 0           | 0.186000001 | 0           |             |
| 0.095938653     | 0.084505962 | 0           | 0.029017901 | 9.47E-19    | 0.029017901 |             |             |             |
| TCGA-HU-A4GH-11 | 0.042156569 | 0.076167178 | 0.027560645 | 0           | 0           | 4.57E-18    | 3.88E-18    |             |
| 9.92E-18        | 0           | 0           | 0.001548145 | 0           | 1.62E-17    | 7.56E-18    | 0.046310263 | 0.15030562  |
| 0.008517328     | 0.005568048 | 0           | 0.129460272 | 2.2E-18     | 0.029421447 | 4.17E-20    |             |             |
| 0.56019507      | 2.02E-19    | 0.00825702  | 0.630275963 | 0.051528895 | 7.24E-20    | 0.110248177 |             |             |
| 0               | 0           | 0.001370263 | 1.31E-18    | 0.022220519 | 0           | 0           | 0.007532361 | 0.017063422 |
| 0.005042224     | 0           | 4.17E-17    | 0.077678252 | 0.044199502 | 2.11E-17    | 0.034085452 |             |             |
| 0.011008002     | 0           | 0.113285514 | 2.89E-17    | 1.34E-17    | 0.142296037 | 9.04E-18    | 1.28E-17    |             |
| 0.123196912     | 0           | 2.46E-19    | 0.001314927 | 0.549881086 | 4.79E-18    | 0           | 7.82E-19    | 0           |
| 0.010700151     | 0.38291126  | 0.393611411 |             |             |             |             |             |             |
| TCGA-HU-A4GJ-01 | 0.447342115 | 0           | 8.1E-18     | 1.425920248 | 0           | 0.164955239 | 0.259725962 |             |
| 0.066276877     | 1.56E-18    | 1.69E-17    | 0.014716601 | 0.250497959 | 0.272211849 | 0.07990274  |             |             |
| 0.179255083     | 0.009185605 | 0.417405092 | 0.003920783 | 0.001604839 | 0.035855598 |             |             |             |
| 0.033632344     | 0.001403596 | 0.328195113 | 0.000162463 | 0.058562628 | 0.008315927 |             |             |             |
| 0.000242658     | 0.109408634 | 0.171937839 | 0.024710408 | 0.019175091 | 0.013962186 |             |             |             |
| 0.016167923     | 0.006590128 | 0.0427377   | 0.008412777 | 0           | 0.480387601 | 0.036467229 |             |             |
| 0               | 1.92E-18    | 0           | 2.56E-17    | 0.033063013 | 1.68E-18    | 0.21482884  | 0.001112688 | 0           |
| 7.09E-18        | 0.052450088 | 4.51E-18    | 0.037582261 | 0.038055248 | 0.114009135 | 0           |             |             |
| 0.019600432     | 0.156541177 | 0.018633867 | 5.82E-19    | 0.171915608 | 4.7E-19     | 0.077761644 |             |             |
| 0.161470349     | 0           | 1.224436108 | 0.046097486 | 1.270533594 |             |             |             |             |
| TCGA-HU-A4GN-01 | 0.145928347 | 0           | 0           | 0.035350886 | 0.173070135 | 0.007046257 | 0           |             |
| 2.74E-18        | 0           | 0           | 0.008680852 | 0           | 0.007353463 | 1.98E-19    | 0.023227358 | 1.19E-19    |
| 0.022089737     | 0.004114995 | 0           | 0.001342506 | 0.00518763  | 0           | 0.682012331 |             |             |
| 2.37E-19        | 2.84E-18    | 3.4E-18     | 0.004290448 | 0           | 0.03674924  | 0.12857604  | 0.003554318 |             |
| 0.002491444     | 0.005319951 | 0.005881152 | 0.011383814 | 0           | 0.003838962 | 0.017882157 |             |             |
| 0.077727343     | 0.009723101 | 1.13E-17    | 8.55E-18    | 0.04527555  | 0.011259536 | 0.002272671 |             |             |
| 0.004826217     | 0           | 0           | 4.02E-17    | 0.030242059 | 1.18E-18    | 0.026415589 | 0.033463688 |             |
| 0.010313776     | 1.16E-18    | 0.000934196 | 0.019969087 | 0.067830249 | 0           | 0.231107721 | 0           |             |
| 0.180037404     | 0.203523833 | 0           | 0.033712433 | 0.002593815 | 0.036306248 |             |             |             |
| TCGA-HU-A4GN-11 | 0.059716335 | 0.022408238 | 0.030604088 | 1.13E-18    | 0.000518245 |             |             |             |
| 2.79E-18        | 0           | 0           | 1.93E-18    | 0           | 0.006752921 | 8.17E-19    | 1.42E-17    | 0           |
| 0.111482571     | 3.03E-18    | 0.0102392   | 0.003996347 | 7.5E-19     | 0.006699746 | 0           |             |             |
| 0.281125617     | 0           | 0.377107519 | 0           | 0.013928817 | 0.278098659 | 0.026290383 |             |             |
| 0.021910351     | 0.011957806 | 5.88E-19    | 4.58E-20    | 0.001773344 | 0           | 0.007182259 |             |             |
| 0.003962697     | 0           | 0.017260194 | 0.025136694 | 0.004022508 | 6.1E-19     | 0.003716252 |             |             |
| 0.005526913     | 0.031564534 | 0           | 0.028953755 | 0.009384282 | 0           | 0.140248023 |             |             |
| 1.34E-18        | 0.021196621 | 0.052709556 | 3.2E-20     | 0           | 0.053084347 | 1.72E-18    | 0.006684791 |             |
| 0.007453385     | 0.555375697 | 0           | 0.002905939 | 0.0070007   | 1.83E-19    | 0.00893786  |             |             |

0.203107752 0.212045612

TCGA-HU-A4GP-01 0.118284382 0 3.58E-18 0.0434323 0.052288536 6.29E-21  
2.93E-18 0 1.03E-18 5.35E-18 0.009399246 0 0 5.3E-19 0.028629353  
1.43E-18 0.024664089 0.008497605 0 0.000617489 0.065202154 0.011535014  
0.658785911 0 0 0 0.004943805 0.088243173 0.004409073 0.067466387  
0.036203852 0.008548111 0.01431972 0.010877805 0.005612976 0.010958367 0  
0.034033745 0.048678875 0.009403751 6.92E-19 0 1.17E-18 0.030827323  
2.06E-18 0.004065407 0.000212461 0.003009639 0 0.021838022 0 0.007352727  
0.101482582 0.008217046 3.54E-19 0.000166466 0.012196345 0.040480858  
4.47E-19 0.22009405 0 0.045365382 0.176426386 0 0.048503686 0.032601077  
0.081104763

TCGA-HU-A4GP-11 0.084197355 0.042698555 0.038274211 1.23E-17 0.000240239  
5.79E-19 3.69E-19 0 0.006300696 5.39E-18 0.015886523 0.023771547 9.89E-19 0  
0.104707083 0.143831752 0 0.00957137 0.02514769 0.007260115 0.075254845  
0 0 0 0.496748892 0.011079471 0.004677235 0.423928642 0.200144083  
1.46E-19 0.047946245 1.23E-18 0 0.007221322 0.00575179 0.012569894 0 0  
0.015018374 0.006936249 0.004809576 0 0 0.051401357 0.039320949  
5.59E-18 0.057436848 0.008344939 0 0.149220296 1.59E-17 0 0.130726943  
5.43E-19 1.46E-19 0.046601871 0 0 5.11E-19 0.621301756 0 0.014881351  
0.006279832 0 0.033291978 0.307351146 0.340643124

TCGA-HU-A4GQ-01 0.169911008 0 0.027273186 1.36E-19 0.059675953 0.005222317 0  
0 2.58E-18 2.19E-18 0.002528535 5.2E-19 0.000106396 0 0.027416366  
0.033903331 0.009936693 0.023771661 1.26E-19 0.009803217 4.66E-19 1.83E-18  
0.523382082 2.6E-19 0.115367152 3.24E-18 0.002586046 0.053408332 0.116969654  
0.07035833 0.004580666 0.020610727 0.02999242 0.002466201 0 2.5E-19  
0.003820147 0 0.069816511 0.023224421 0.004097277 0 0 0 0.004579877  
6.47E-19 0.002213186 0 2.14E-18 0.069688319 0 0.036401789 0 0.006576961  
5.98E-18 0 0 0.038127588 0.004062873 0.497042826 0 0.069353479  
0.263249271 0 0.023007481 0.057683576 0.080691057

TCGA-HU-A4GT-01 0.092000341 2.99E-19 0 0.018785947 0.051576632 0.012207412  
3.24E-19 4.81E-19 1.66E-17 7.22E-18 0.009225474 7.62E-19 0.004922664 4.02E-18  
0.010506573 0 0.009766292 0.026172071 0 0.003910053 0 8.99E-19  
0.590364105 1.79E-21 0 0 0.002253674 0.013335374 0.06046257 0.07630019  
0.00209454 0.022621929 0.030885016 0.014441855 0.008495477 0 0  
0.01158581 0.109310661 0.005928955 0 5.2E-18 1.06E-17 0 0.000250372 0  
0.00017289 0 1.42E-17 0.063126872 0.018125697 0.016538427 2.03E-18  
0.028976992 0 0 0.006689011 0.074212369 0 0.268714049 5.72E-18  
0.129358743 0.18218893 0 0.035875604 1.5E-19 0.035875604

TCGA-HU-A4GU-01 0 0 0 0.003113624 0.061620539 0.007018041 1.94E-18  
2.88E-19 0.0000902 4.42E-18 9.52E-21 0 1.94E-19 7.72E-18 0.018860137 0  
0.018004181 0.025702797 4.04E-18 0.001249919 0 2.24E-18 0.569677807 0  
1.85E-17 0 0 0 0.236259468 0.058355529 4.07E-19 0.011592432 0.016835232  
0.02330366 0.00342863 6.46E-20 0.003373419 1.93E-18 0.05326361 0.012316491  
0 2.28E-19 0.016441229 1.67E-19 4.22E-19 0 0.000547879 3.04E-19 2.01E-18

0.070656265 0.042885663 0.006680935 0.046751345 0.020734345 0 0  
 0.003133877 0.043715605 6.35E-19 0.317458124 4.26E-20 0.102730289 0.116390024  
 4.72E-20 0.01292307 9.23E-18 0.01292307  
 TCGA-HU-A4GX-01 0.197499123 0 8.77E-18 0.115632928 0.067111301 0.019471015  
 7.53E-19 0 1.57E-17 4.78E-18 0.032942805 0.125129998 0.185024778 0.027973581  
 0.007206423 1.96E-18 0.036468081 0.012436457 1.17E-18 6.26E-20 0 1.64E-19  
 0.505297405 4.1E-19 0 1.96E-19 0 0.033297899 1.77E-17 0.038555286  
 0.000219007 0.033671197 0.037058837 0.021532114 0.004879505 0 0  
 0.026155705 0.105488726 0.000168056 0 0 3.08E-18 2.04E-19 0.001988073  
 7.02E-19 0.000435647 0 0 0.054665428 0 0.05710278 7.3E-18 0.062687954  
 2.35E-18 0 0.005061208 0.01383282 0 0.320847104 1.07E-17 0.148103829  
 0.184020171 1.89E-17 0.186209086 0 0.186209086  
 TCGA-HU-A4GY-01 0.473873091 0 0.031648751 0.799858007 1.13E-19 0.08454376  
 0.234981094 0.049259052 2.34E-20 0 0.015669952 0.179013213 0.168674689  
 0.03451183 0.300281448 0.050494847 0.156741678 0.0017334 0 0.076785777  
 0.071459376 0 0.305704287 1.3E-20 0.218500588 0.001122638 0 0.262291166  
 0.543121907 0.022413733 0.039364446 0.108404376 0.072156315 0.066901803  
 0.010535235 0.009081969 0 0.307227711 0 0.012767933 0.043023368  
 5.58E-18 0 0.041460698 1.55E-18 0.114611847 0.005019638 0 0 0.003360635  
 6.46E-18 0.020673123 0.007781161 0 0.000455663 0.051353948 0.053740868  
 0.010645943 0 0.300157695 0 0.017874801 0.035976824 2.69E-18 0.844586019  
 0.144979982 0.989566001  
 TCGA-HU-A4GY-11 0.078508272 0.043658347 0.036737713 0 0 2.01E-18 0 0  
 0.000884558 6.89E-18 0.008754098 0 4.91E-19 0 0.0661508 0.153737501 0  
 0.016850432 0.018978602 0 0.17450491 4.29E-19 0 4.22E-21 0.52711194 0  
 0.003852193 0.649406646 0.092511874 1.14E-18 0.123252822 2.11E-18 0  
 0.002145417 4.85E-19 0.028989725 0.005422835 2.03E-17 0.021631428 7.85E-19  
 1.05E-18 2.87E-17 9.56E-18 0.100267788 0.042359806 0 0.043179405 0  
 3.65E-17 0.159911177 2.05E-18 0 0.139913299 0 0 0.057222617 0 0  
 0.009049133 0.6145729 1.31E-17 0.020609667 0.004905375 6.91E-18 2.7E-17  
 0.372637598 0.372637598  
 TCGA-HU-A4H0-01 0.274593275 2.65E-18 4.66E-18 0.085969759 0.140463869 0.033759821  
 0.006670755 3E-20 4.1E-19 5.77E-18 0.008609174 0.056310241 0.059269306  
 0.023118726 0.077377355 7.66E-18 0.047210742 0.009801449 0 0.013032747  
 0.011539602 0.000934252 0.519253032 1.14E-18 0 4.32E-18 0 0.040362756  
 0.077658081 0.064804858 0.009993058 0.038026202 0.031683646 0.031413618  
 0.01266856 0.00037684 1.7E-18 0.011617276 0.083602761 0.002962982 0 0  
 1.05E-17 0.010941911 0.001593149 1.91E-20 0.00000395 0 0 0.064086909  
 0.010764542 0.056277904 0.056777849 0.00909851 0 5.39E-18 0.004739793  
 0.033095298 2.72E-18 0.20526995 0.028049791 0.123824294 0.240902526  
 1.52E-18 0.137961174 0.005769801 0.143730975  
 TCGA-HU-A4H2-01 0.174333171 3.69E-19 0 0.114186847 0.01610712 0.001276238 0  
 1.08E-18 0.021341675 2.22E-18 0.00651977 0.014098121 0.037160228 7.89E-19  
 0.023428366 0 0.031594819 0.014750574 0 0.005163262 0 0.013950371

0.590302662 2.02E-19 4.2E-18 0 0.000115504 0.062792929 3.48E-19 0.058870476  
 0 0.009422949 0.008263199 0.012381475 0.020319155 0.001201399 0.004057345  
 0.058684467 0.08800405 0.004280843 0 0 0.057706537 0 3.72E-18 0  
 0.000546849 2.53E-18 0 0.076875849 1.64E-18 0.015384845 0.061474666  
 0.01536293 0 0 0.021706247 0.047488412 0 0.193907311 2.59E-18  
 0.130742418 0.127687585 0 0.118093803 2.28E-18 0.118093803  
 TCGA-HU-A4H3-01 0.142252052 0 1.23E-18 0.022393901 0.03600928 0.015455568  
 1.28E-18 0 6.28E-20 0 0.025481535 0.010959341 0.017479211 0.013786179  
 0.002376238 0 0.019252448 0.019916502 5.33E-20 0.001858525 6.36E-19  
 7.82E-19 0.621221549 0.00032705 1.04E-19 2.26E-18 2.34E-20 0.004129227  
 0.036047507 0.123022785 0 0.013489536 0.013975981 0.009931688 0.009197427  
 0 0 0.007617557 0.078372372 0.054244412 0.000648648 0 1.42E-18 0 0  
 0.000429385 0.000420519 0.002510646 0.016063813 0.034174573 0 0.046593266  
 0 0.010638729 0.002418692 0 0.008198188 0.04061449 0 0.355152083 0  
 0.159864342 0.137926913 0 0.051414558 3.7E-19 0.051414558  
 TCGA-HU-A4H4-01 0.312268099 1.6E-20 0 0.13925103 0.140258742 0.016084842  
 0.017247609 0 0 0 0.016060189 0.064454161 0.077506881 0.006702876  
 0.031317535 0 0.059106698 0.021681006 3.29E-18 0.014911589 0.05053679 0  
 0.548773093 0 1.99E-18 9.35E-19 0.0000299 0.041931817 0.051840358  
 0.045369293 0.028371846 0.041163346 0.036991777 0.011328783 0.006886066  
 0.004754413 0.002423364 0.050918895 0.080794492 0.008015383 5.11E-20  
 1.82E-18 0.014535694 0.034551704 0 0.003862863 0.000190688 6.02E-19  
 1.62E-17 0.034895502 0 0.060207738 0.043705803 0.028002911 2.68E-19  
 1.47E-17 0.017801273 0.037571295 0 0.236236069 0.011851095 0.184575233  
 0.165214737 2.2E-18 0.177777461 0.025268395 0.203045857  
 TCGA-HU-A4H5-01 0.039039188 0 3.33E-18 0.023869825 0.079797257 0.00504549  
 0.021096329 0 0 0 0.010657365 0.01148142 0.006007997 4.8E-18  
 0.049870177 4.2E-19 0.023032743 0.020547564 0 0 0.021389373 1.04E-19  
 0.494720118 4.69E-19 2.6E-19 0 0 0.050091193 0.129302877 0.055493353  
 0.010821855 0.008788808 0.015360086 0.006916664 6.19E-21 0 0 0.009767914  
 0.050935224 0.015003507 1.92E-18 0 6.27E-18 0.016102165 0.000830824  
 1.66E-19 0.002284057 0.0021568 0 0 0.006366728 0.002458807 0.058539784  
 0.02789078 0 0 0.008740412 0.033911998 0 0.281259922 1.99E-17  
 0.07836294 0.086868913 9.57E-18 0.030864569 0.010694686 0.041559255  
 TCGA-HU-A4H6-01 0.193864518 2.72E-20 3.55E-18 0.311636687 0 0.002758633  
 4.07E-19 0 1.05E-17 6.1E-18 0.007058626 0 0.01818734 0 0.032619758  
 2.06E-18 0.044908077 0.0143457 9.32E-20 0.000861345 0.091900442 9.53E-21  
 0.630414822 0 0 3.2E-19 0.000512713 0.157000949 0.024554302 0.074534183  
 0.053038805 0.010420539 0.017736884 0.005196884 0.011045068 0.008328675  
 4.36E-18 0.146303032 0.081104303 0.025309397 0.009180554 0 0 0.046652352  
 1.22E-19 0.029845156 0.000583118 0.012114579 4.28E-18 0.018526522 0  
 0.014778521 0.017945468 0.048305846 2.62E-19 1.4E-17 0.045025962 0.050507057  
 4.98E-18 0.341523582 1.17E-17 0.12973729 0.090017069 0 0.23683918  
 0.045950221 0.282789401

TCGA-HU-A4H8-01 0.101702343 1.41E-18 2.34E-17 0.044958584 0.088641056 0.011557879  
0 0 0 0 0.003835059 0.002984116 0.003563992 0 0.031477105  
7.15E-19 0.035518707 0.009145839 0 0.003165256 0.000233782 0 0.554392397  
8.84E-19 0 0 0.000990727 0.021207834 0.050035722 0.075280559 0.004058384  
0.009977434 0.010031454 0.015963781 0.009053299 0.004056917 0 0.013666485  
0.063971353 0 0 6.58E-18 1.36E-17 0.004750123 0.001305049 0.002467089  
0.000299781 2.26E-21 1.28E-17 7.5E-19 0.00141478 0.021388033 0.00485734  
0.011585108 0.008103583 1.97E-18 0.021725333 0.033944094 6.07E-18 0.254520557  
4.13E-18 0.10181074 0.116245475 2.36E-19 0.046759126 0.000116891 0.046876017

TCGA-HU-A4HB-01 0.338175653 1.21E-18 9.96E-19 0.88477143 0 0.047979171  
0.072843461 0.000245489 0 0 0.007945556 0.041783825 0.113758267  
0.014434218 0.091814163 1.53E-18 0.149833169 0.00209749 0.004128684  
0.021537895 0.001165396 0.003782648 0.527345673 0.001124378 0 0.025351615  
0.020071165 0.060994038 0.13944819 0.048878251 0.005680742 0.024604201  
0.024437407 0.03171385 0.028859633 0.005301331 0 0.354445745 0.050457901  
0.005425349 0.0000754 0 4.23E-18 0.00552599 4.19E-19 0.15267876  
0.0000769 0 0 0.042388112 8.4E-18 0.069252112 0.010310511 0.075559351  
0 1.49E-18 0.110164223 0.027308265 0 0.190162545 0 0.037334985  
0.077770095 0 0.670440359 0.000582698 0.671023057

TCGA-HU-A4HB-11 0.087009815 0.063756205 0.033312393 0 0 1.39E-18 5.79E-19 0  
2.56E-19 0 0.012638199 0 0 0 0.061078554 0.129808058 0 0.015219073  
0.015079866 1.47E-18 0.073373657 0 0.000566285 0 0.476245946 0  
0.003276094 0.493660427 0.030237114 3.95E-19 0.063099101 7.89E-19 0 0 0  
0.019803614 0 0 0.008198635 0.002907606 1.01E-18 0 1.58E-18 0.044436058  
0.030569515 0 0.047112615 0.002239987 0 0.132522558 4.1E-17 6.42E-18  
0.098470127 0 9.19E-19 0.016269851 0 2.42E-20 0.001462874 0.652617464 0  
0.003881013 0.021889476 0 0.001493325 0.306687904 0.308181229

TCGA-HU-A4HD-01 0.075310073 0 0 1.53E-19 0.017317188 0 0 0 0 2.7E-18  
5.45E-19 5.56E-20 2.2E-18 5.19E-18 0.009746489 0.011874368 0.008565255  
0.017161291 0.000439046 0.004936521 0.002578195 0.003999316 0.625411256 0  
0.001007229 4.13E-18 0.006964591 0.068562205 0.110271202 0.051067898  
0.005718765 0.005751769 0.011755805 0.008195911 0.005276777 0.00205899 0  
2.78E-19 0.076498891 0.034861128 7.14E-19 0 0 0.008044839 0 6.33E-20  
0.000487934 0.005390082 2.61E-17 0.131230623 0 7.27E-20 0.006451627  
0.002888945 2.87E-21 4.24E-18 3.98E-18 0.051117121 2.3E-18 0.314083756  
1.41E-17 0.103527932 0.056134164 0 0.016902977 0.001792712 0.018695689

TCGA-IN-7806-01 0.059701673 0.007554354 5.47E-19 0.029269487 0.054757565 3.3E-20  
7.29E-19 2.01E-18 0.010993756 7.99E-19 2.4E-19 3.63E-18 0 6.59E-18 0.004440743  
0.018984871 0.034130474 0.002254734 0 0 6.18E-19 6.85E-21 0.623402489 0  
0.015713722 2.41E-18 0.004430563 0.098808092 0.019347449 0.164731748  
0.008793845 0.001565188 0.005357169 0.01533554 0.002554223 0.000132538  
0.003221837 0.034849092 0.065106896 0.012183889 5.13E-18 0 0.030382974  
0.002072286 0 0 0.005003957 0 0 0.035868313 0.027889962 0.013026233  
0.045528179 2.09E-19 0 8.99E-20 0 0.106445463 0 0.132104211 0

|                 |             |             |             |             |             |             |             |             |
|-----------------|-------------|-------------|-------------|-------------|-------------|-------------|-------------|-------------|
| 0.05541257      | 1.38E-18    | 1.32E-18    | 0.022259266 | 0.011634038 | 0.033893304 |             |             |             |
| TCGA-IN-7806-11 | 0.029011411 | 0.00556908  | 0           | 0           | 0.086249222 | 0           | 0           | 3.6E-18     |
| 0.030288179     | 1.49E-18    | 0.000338394 | 0           | 7.86E-19    | 0           | 0.148679665 | 0.022425532 |             |
| 0.028235058     | 1.91E-19    | 1.3E-18     | 0.000772065 | 0.002616606 | 2.73E-20    | 0.790991403 | 0           |             |
| 0.014686413     | 0           | 0.0000593   | 0.077664716 | 0.025965446 | 0.429909478 | 0.010503878 |             |             |
| 0               | 8.87E-20    | 0           | 0.006598153 | 0           | 1.04E-19    | 2.68E-19    | 0.014468029 | 7.74E-19    |
| 1.47E-18        | 0           | 1.54E-17    | 0.020326459 | 0.010008022 | 0           | 0.001749127 | 0.009036012 | 0           |
| 0               | 0.00659216  | 0.005433655 | 0.002730831 | 0.00245951  | 0.016796256 | 0           | 0           |             |
| 0.382308324     | 3.18E-18    | 0.302532495 | 1.14E-18    | 0.062950282 | 0.000152972 | 0           |             |             |
| 0.010937487     | 0.011436049 | 0.022373536 |             |             |             |             |             |             |
| TCGA-IN-7808-01 | 0.374729095 | 3.46E-21    | 0           | 1.020464141 | 0.121612954 | 0.08563527  |             |             |
| 0.238745645     | 0.02358161  | 0.058919685 | 7.18E-18    | 0.010668187 | 0.256661037 |             |             |             |
| 0.228464749     | 0.033791532 | 0.170250397 | 1.96E-18    | 0.259736197 | 0           | 1.55E-18    |             |             |
| 0.035425509     | 0.019855683 | 0           | 0.320665956 | 2.12E-18    | 0.081521696 | 0           | 0.004539525 |             |
| 0.13788685      | 0.321189705 | 0.010665938 | 0.014393883 | 0.01049991  | 0.009061347 |             |             |             |
| 0.010489215     | 0.012919546 | 0.007983955 | 0.010220708 | 0.388019349 | 0.01871199  |             |             |             |
| 0.011366569     | 0           | 1.5E-18     | 1.39E-18    | 0.02418349  | 1.13E-18    | 0.166621035 | 0.003364941 |             |
| 0               | 0           | 0.125408492 | 0           | 0.056599773 | 0.066856289 | 0.028967925 | 9.83E-19    |             |
| 2.84E-18        | 0.134071939 | 0.008098222 | 0           | 0.198983426 | 0           | 0.068322565 | 0.02968636  |             |
| 0               | 0.906367836 | 0.05068869  | 0.957056526 |             |             |             |             |             |
| TCGA-IN-8462-01 | 0.18220298  | 0           | 0.019458732 | 0           | 0.015352908 | 3.29E-19    | 0           | 0           |
| 0.002544255     | 0           | 0.000423886 | 0           | 0           | 4.5E-18     | 0.047402038 | 0.091055447 |             |
| 0.039709191     | 0.001572309 | 4.12E-20    | 0.004527766 | 0.012028627 | 0.001288603 |             |             |             |
| 0.830540353     | 1.19E-19    | 0.043014008 | 0           | 0.004415221 | 0.2157814   | 1.43E-18    |             |             |
| 0.342463745     | 0.023095513 | 0           | 0.002797541 | 0           | 0           | 0.004921215 | 1.65E-18    |             |
| 3.89E-18        | 0.05176614  | 0.064013532 | 0.00257078  | 3.2E-19     | 0           | 0.009092233 |             |             |
| 0.001377856     | 0           | 0.001569447 | 0.008630669 | 0           | 0.066004432 | 5.92E-18    | 0           |             |
| 0.02082745      | 0.002231064 | 3.76E-19    | 0           | 0           | 0.293363373 | 5.74E-20    | 0.30607647  | 0           |
| 0.060765998     | 0           | 0           | 0.011345212 | 0.027521317 | 0.03886653  |             |             |             |
| TCGA-IN-8462-11 | 0.103272717 | 0           | 1.02E-17    | 0.014070741 | 0.137766955 | 4.5E-19     |             |             |
| 1.05E-17        | 7.3E-18     | 0.031511155 | 3.09E-18    | 0           | 1.46E-18    | 4.35E-19    | 1.13E-17    | 0.160655509 |
| 0.017370041     | 0.037951522 | 0.005500307 | 0           | 0.006125375 | 0           | 0.002456062 |             |             |
| 0.780514918     | 0           | 0           | 2.67E-18    | 5.46E-20    | 0.03714325  | 6.38E-19    | 0.402219465 |             |
| 0.000243074     | 0           | 0           | 0           | 0.006416275 | 0.001859574 | 2.44E-18    | 0           | 0.01052419  |
| 4.08E-18        | 1.14E-17    | 0           | 1.98E-18    | 0.013786589 | 4.79E-18    | 0.000990338 | 0.010429497 | 0           |
| 0               | 0           | 0.003991807 | 3.11E-19    | 0.0000968   | 0.000894882 | 5.36E-18    | 0           | 0.370260686 |
| 0               | 0.309244393 | 0           | 0.046437199 | 0.018399116 | 3.01E-19    | 0.026331967 | 0           |             |
| 0.026331967     |             |             |             |             |             |             |             |             |
| TCGA-IN-8663-01 | 0.093536864 | 0           | 3.4E-19     | 1.39E-20    | 0.050499448 | 0.003045287 | 0           | 0           |
| 0.0033          |             |             |             |             |             |             |             |             |

|                 |             |             |             |             |             |             |             |
|-----------------|-------------|-------------|-------------|-------------|-------------|-------------|-------------|
| 0.0000578       | 0.000941231 | 0           | 7.19E-21    | 0           | 0.000738455 | 0.05283995  | 0.006471546 |
| 0               | 4.68E-19    | 0.003316586 | 0.051018506 | 9.52E-18    | 0.352024759 | 2.81E-20    | 0.040326235 |
| 0.190418837     | 0           | 0.019399032 | 0.002942569 | 0.022341601 |             |             |             |
| TCGA-IN-8663-11 | 0.00695256  | 0           | 2.93E-18    | 0.00630858  | 0.074907208 | 2.53E-19    |             |
|                 | 3.96E-19    | 1.71E-18    | 0.011327211 | 0           | 0.003177592 | 6.68E-19    | 2.92E-18    |
|                 | 0.130226138 | 1.9E-18     | 0.029637181 | 0.006231668 | 5.82E-21    | 1.24E-20    | 0           |
|                 | 0.74237064  | 7.6E-19     | 0           | 0           | 0.032716016 | 0.039018305 | 0.41797756  |
|                 | 7.25E-19    | 0           | 1.39E-18    | 0           | 0.013407454 | 0           | 1.63E-20    |
|                 | 3.03E-18    | 1.8E-17     | 0           | 0           | 0.015114774 | 5.06E-19    | 0.002428254 |
|                 | 5.67E-19    | 0.002002908 | 6.98E-18    | 0           | 0.017901754 | 0           | 0.000772007 |
|                 | 1.31E-17    | 0.374810731 | 0           | 0.056869407 | 0.009583788 | 0           | 0.019831262 |
|                 | 0.019831262 |             |             |             |             |             |             |
| TCGA-IN-A6RI-01 | 0.042239748 | 0           | 5.09E-18    | 0.00828141  | 0.102370454 | 1.59E-19    | 0           |
|                 | 1.11E-18    | 0           | 5.42E-18    | 0.002963848 | 5.03E-18    | 4.84E-18    | 0           |
|                 | 0.008550284 | 0.022445667 | 0           | 0           | 0.003217514 | 3.3E-19     | 0.566815123 |
|                 | 4.72E-18    | 0.005996106 | 0.011237454 | 0.108085024 | 0.061087061 | 0.00970852  |             |
|                 | 0.013567841 | 0.022290263 | 0.027795427 | 0.004564538 | 0.003043496 | 3.47E-19    |             |
|                 | 0.008856255 | 0.067591538 | 0           | 1.14E-20    | 2.97E-19    | 4.11E-18    | 0.009829966 |
|                 | 0.003381427 | 0.000730935 | 0.005233926 | 1.63E-17    | 0.026887999 | 0.048992578 |             |
|                 | 0.00348061  | 0           | 0.017772559 | 8.06E-20    | 0           | 0.019586003 | 0.0367628   |
|                 | 0.232785921 | 1.12E-17    | 0.182687009 | 0.112920556 | 0           | 0.021098477 | 0.001608757 |
|                 | 0.022707234 |             |             |             |             |             |             |
| TCGA-IN-A6RJ-01 | 0.11174762  | 1.09E-18    | 0           | 0.026782382 | 0.08905055  | 0           | 0           |
|                 | 1.82E-18    | 0.027486193 | 1.12E-18    | 0.002284889 | 4.38E-18    | 2.5E-18     | 1.54E-17    |
|                 | 0           | 0.038548901 | 0.000932484 | 0           | 0.003034868 | 0           | 0.002184988 |
|                 | 1.28E-17    | 6.9E-18     | 8.38E-19    | 0.019647966 | 0.00745184  | 0.415368546 | 0.001339766 |
|                 | 5.67E-19    | 0.000662688 | 0.001776545 | 0.006714101 | 0.001412639 | 0           | 0           |
|                 | 0.010227766 | 0.000921321 | 0           | 0           | 0.001660506 | 0.005363648 | 0           |
|                 | 0.006327918 | 3.89E-18    | 0           | 8.7E-18     | 0           | 0           | 0.002544843 |
|                 | 0.007591212 | 0.364672641 | 0           | 0.242168653 | 1.94E-17    | 0.128578441 | 0.01059821  |
|                 | 0.030643718 | 6.94E-18    | 0.030643718 |             |             |             |             |
| TCGA-IN-A6RL-01 | 0.150864622 | 7.92E-20    | 0           | 0.050142356 | 0.101184963 | 1.86E-19    | 0           |
|                 | 7.95E-18    | 0           | 2.11E-17    | 2.63E-21    | 3.3E-18     | 0           | 2.6E-17     |
|                 | 0.005559774 | 0           | 0.004027485 | 0.000339838 | 0           | 0.691009614 | 1.14E-19    |
|                 | 0.003730554 | 0.101057923 | 0.086386097 | 0.101095429 | 0.0066777   | 0.008921442 |             |
|                 | 0.019662008 | 0.003037204 | 0.007814217 | 0.000588199 | 2.3E-18     | 0.020349492 |             |
|                 | 0.058307408 | 0.035467527 | 3.33E-20    | 0           | 0           | 0.004725612 | 0           |
|                 | 0.00035127  | 0.004219519 | 3.47E-17    | 0.026154544 | 0           | 0.008206349 | 7.71E-20    |
|                 | 0.020380842 | 6.68E-18    | 8.36E-19    | 0           | 0.033072616 | 0           | 0.363361091 |
|                 | 0.029568701 | 1.39E-19    | 0.050083345 | 0.000169919 | 0.050253265 |             |             |
| TCGA-IN-A6RO-01 | 0.073685011 | 1.53E-18    | 0           | 0.013994198 | 0.03812277  | 0.012101565 | 0           |
|                 | 0           | 3.61E-19    | 1.23E-17    | 1.45E-20    | 0           | 0           | 3.28E-18    |
|                 | 0.017261437 | 5.89E-19    | 0.002608308 | 6.12E-20    | 0.005146361 | 0.627985068 | 0           |
|                 | 0           | 0.002716479 | 0.          |             |             |             |             |

|                 |             |             |             |             |             |             |             |             |
|-----------------|-------------|-------------|-------------|-------------|-------------|-------------|-------------|-------------|
|                 | 0.00619164  | 0           | 0.004137128 | 0.001104743 | 0           | 0.005811309 | 0.084434452 |             |
|                 | 0.022117854 | 1.82E-18    | 4.95E-18    | 3.39E-18    | 2.45E-19    | 0.003642059 | 0.002843016 |             |
|                 | 0.000487882 | 1.32E-19    | 1.3E-17     | 0.120936089 | 0.017172799 | 0.013846325 | 0.127863204 |             |
|                 | 0.011550273 | 1.88E-20    | 0           | 0.002707193 | 0.018872248 | 0           | 0.129220157 | 0.011004031 |
|                 | 0.118643389 | 0.168266953 | 3.93E-18    | 0.01725733  | 8.05E-19    | 0.01725733  |             |             |
| TCGA-IN-A6RR-01 | 0.12951954  | 0           | 0           | 0.013484667 | 0.035106254 | 1.15E-19    | 0           | 0           |
|                 | 0.018763065 | 0.011180247 | 0.022408221 | 0.019725686 | 0.008560719 | 1.03E-18    |             |             |
|                 | 0.018047494 | 0           | 0.005365991 | 0.014263462 | 0           | 0.002087189 | 0.027601712 |             |
|                 | 1.16E-19    | 0.704660044 | 4.58E-19    | 0           | 5.04E-18    | 0           | 0.064667492 | 0.026312264 |
|                 | 0.083536341 | 0.028886635 | 0.005113774 | 0.011290353 | 0.005328633 | 0.006249283 |             |             |
|                 | 0.008750702 | 0           | 0.008276917 | 0.081987984 | 0.027195474 | 0.00000921  | 0           | 0           |
|                 | 0.01938781  | 0.000519811 | 0.000427929 | 0.001169247 | 0.003420096 | 5.55E-18    |             |             |
|                 | 0.025112914 | 1.42E-17    | 0.022637334 | 0           | 0.01727639  | 0           | 0           | 0.034352895 |
|                 | 0.265053327 | 0           | 0.107443373 | 0.024517313 | 1.63E-19    | 0.033393268 | 0.013800856 |             |
|                 | 0.047194124 |             |             |             |             |             |             |             |
| TCGA-IN-A6RS-01 | 0.144420516 | 0           | 3.16E-17    | 0.015695024 | 0.11239013  | 0.018755744 | 0           |             |
|                 | 0           | 1.29E-18    | 3.17E-17    | 9.3E-20     | 0.004473119 | 0.046000599 | 4.61E-18    | 0.046632418 |
|                 | 0.01228006  | 0.034633649 | 6.17E-18    | 0.011203733 | 0.06602579  | 5.08E-19    | 0.599315922 |             |
|                 | 0           | 0           | 6.36E-20    | 0.003089602 | 0.051244405 | 0.216613999 | 0.17636791  | 0.027321065 |
|                 | 0.016604975 | 0.026992086 | 0.001133899 | 0           | 0           | 8.73E-18    | 0           | 0.056759167 |
|                 | 0.001883593 | 0.010732749 | 3.08E-18    | 0           | 0.033495618 | 0.000375723 | 0.001451991 |             |
|                 | 0.0000658   | 0.010004755 | 1.33E-17    | 0.113323296 | 5E-19       | 0.039684086 | 0.054232799 |             |
|                 | 0.017754668 | 0           | 7.4E-18     | 0           | 0.121127884 | 3.42E-18    | 0.26905834  | 0           |
|                 | 0.223872368 | 4.43E-18    | 0.04580957  | 0.033012895 | 0.078822465 |             |             |             |
| TCGA-IN-A7NR-01 | 0.282453909 | 0.009169781 | 5.55E-18    | 0.137447879 | 0.01222762  |             |             |             |
|                 | 0.002478165 | 5.5E-21     | 8.65E-19    | 0.007099378 | 2.75E-18    | 0.005346924 | 0.002017184 |             |
|                 | 0.02058055  | 0           | 0.049767133 | 5.66E-19    | 0.030865117 | 0.004150666 | 9.92E-20    |             |
|                 | 0.015533719 | 0.005708774 | 0.004846168 | 0.770178662 | 4.22E-20    | 0.010769184 |             |             |
|                 | 1.71E-18    | 9.28E-19    | 0.099985804 | 0.084510149 | 0.313375043 | 0.012095065 | 0.00092529  |             |
|                 | 0.003075702 | 1.26E-18    | 0.002815297 | 0.005002234 | 0.000442787 | 0.059645236 |             |             |
|                 | 0.047925802 | 0.020585642 | 0.003931773 | 6.65E-18    | 1.07E-19    | 0.008376336 | 0           |             |
|                 | 0.006524692 | 0.001337078 | 0           | 1.43E-17    | 0.034113548 | 9.2E-19     | 0.000379565 |             |
|                 | 6.49E-20    | 0.012095911 | 0           | 0           | 0.00916871  | 0.247749151 | 0           | 0.408764376 |
|                 | 2.34E-18    | 0.092688431 | 0.020813418 | 8.12E-18    | 0.111678207 | 0.01282387  | 0.124502077 |             |
| TCGA-IN-A7NT-01 | 0.151105593 | 0.008333148 | 0.015175181 | 0.016849843 | 0.073338727 |             |             |             |
|                 | 0.002096978 | 0           | 4.42E-20    | 0.006468947 | 7.52E-19    | 0.003622529 | 0.000197265 | 0           |
|                 | 0.015606501 | 0           | 0.019734578 | 0.001817211 | 9.71E-19    | 0.002182191 | 1.5E-18     |             |
|                 | 0.023507997 | 0.694031443 | 7.09E-19    | 0.039688295 | 0           | 1.66E-18    | 0.005388023 |             |
|                 | 0.044293662 | 0.325745838 | 0.001208136 | 0.016733419 | 0.015982589 | 0.009323373 |             |             |
|                 | 0.007109424 | 0           | 0.000888309 | 0           | 0.077293824 | 0.018470812 | 0.013593787 |             |
|                 | 1.18E-18    | 0.149774115 | 0.00433966  | 5.97E-19    | 0.001350886 | 0.000956331 | 0.000287716 |             |
|                 | 0           | 0.034891182 | 0           | 0.00176431  | 0.018646787 | 0.006954805 | 2.29E-18    | 4.78E-19    |
|                 | 0.000859902 | 0.273714065 | 2.98E-19    | 0.352601281 | 9.91E-19    | 0.165345191 | 0.059390426 |             |
|                 | 0           | 0.053641094 | 0.024010722 | 0.077651816 |             |             |             |             |

TCGA-IN-A7NU-01 0.315433448 0.004733917 0 0.030324666 0.046157923 1.15E-20  
0.003339468 6.36E-19 0.01861085 0.008794177 0.006802717 0.006857586  
0.024178045 0 0.064213137 0.025950841 0.020820686 0.020362632 0.001195146  
0.03514236 0.011934214 0 0.691229433 4E-20 0.050565786 1.55E-18  
5.69E-19 0.096740856 0.243931984 0.155366786 0.017356337 0.024967629  
0.041387643 0 0.006217318 0.00536711 2.27E-20 0 0.061660042 0.131451056  
0.042467016 0 4.78E-19 0.011387564 0 2.78E-19 0.000344913 0.00216322  
4.08E-19 0.05238413 0 0.016472447 0 0.01336281 0 0 4.09E-18  
0.066716868 2.67E-20 0.383890622 0 0.125199201 0 0.004534039 0.098759863  
0.033616959 0.132376821

TCGA-IN-AB1V-01 0.045841884 1.22E-18 0 0.066613279 0.108172507 1.62E-18  
1.77E-17 6.1E-18 0.028610782 7.53E-18 0 1.95E-18 1.35E-17 0 0.01218539 0  
0.040598379 0 0 0 3.06E-18 0.000395126 0.800938689 2.59E-18 0 0  
1.99E-18 0.052234062 4.15E-20 0.360856079 0 6.9E-19 8.19E-19 0 0.002499472  
0.003036797 0 0.016210453 0 2.01E-18 1.08E-17 1.54E-17 0 0 0.001347665  
0.015742255 0.000653735 0.00426743 1.92E-17 0 0 0.001429131 7.66E-18  
0.006455887 0 1.14E-17 1.14E-18 0.307744104 1.06E-17 0.287270305 8.66E-19  
0.027181465 0.005823393 0 0.049183538 2.14E-18 0.049183538

TCGA-IN-AB1V-11 0.034105051 1.02E-20 3.37E-18 0 0.110964789 0 2.29E-18  
4.58E-18 0.046797336 1.5E-19 0.000225997 2.62E-18 0 3.11E-18 0.131831617  
0.05125667 0.019135822 0 0.000459753 0 2.13E-18 0 0.679327887 0  
0.077565429 2.5E-18 1.4E-18 0.095088827 0.006011197 0.357889281 0.006319183  
0 9.44E-20 1.35E-19 0.02135716 0.001364406 0 1.38E-18 4.23E-18 2.42E-18  
4.56E-18 7.32E-18 0 0.000643548 0.017944883 6.46E-19 0.002133895 0.005016998  
0 0 0 0.005312643 3.19E-18 0 0.015160096 8.93E-18 0 0.336965343 0  
0.400185142 9.09E-19 0.025086037 0.010213165 0 0.017582772 0.038782714  
0.056365486

TCGA-IN-AB1X-01 0.215542542 0 0 0.126843816 0.123046711 0.011700756  
0.019151891 0.000184698 0.003224054 2.11E-18 0.010431714 0.087313964  
0.117677593 0.030905957 0.028506971 3.1E-18 0.054126989 0.000324024 0  
0.009218427 0 0.000392876 0.717756206 0 0 5.16E-19 0.00229771  
9.46E-19 0.024838643 0.253604583 0 0.014073629 0.017117329 0.013105578  
0.012323159 0 0 0.008960361 0.00437208 0.03156953 0.014564623 0  
2.01E-18 5.13E-19 0 0.01057539 3.99E-21 0 0 0 0 0.047197699  
0.037289812 0.035056452 8.76E-19 2.08E-18 0.011078894 0.1804691 4.66E-18  
0.188742999 4.68E-19 0.06057317 0.149822906 1.23E-18 0.176610128 0  
0.176610128

TCGA-IN-AB1X-11 0.030649999 5.73E-21 0 0 0.034734125 3.78E-20 0 1.93E-18  
0.032476538 0 0.001903664 2.15E-18 0 0 0.120091024 0.072077464  
0.027257551 0.003385602 0.002333897 0.001673742 0.001947943 0.002251707  
0.759620119 0 0.057889712 9.28E-18 0 0.106505582 0.027734623 0.401606873  
0.010538822 0 0 5.26E-20 0.0086211 0.001460417 0 1.22E-17 0 0 0  
0 0 0.007234163 0.00962462 0 0.002029619 0.011373741 0 0  
5.68E-18 0.0017038 1.52E-18 0 0.019421016 4.72E-18 6.24E-19 0.34611831 0

|                 |             |             |             |             |             |             |             |             |
|-----------------|-------------|-------------|-------------|-------------|-------------|-------------|-------------|-------------|
|                 | 0.301183426 | 1.84E-18    | 0.035107861 | 0.005678195 | 0           | 0.01594686  | 0.029918827 |             |
|                 | 0.045865687 |             |             |             |             |             |             |             |
| TCGA-IP-7968-01 | 0.181556163 | 0.001243655 | 0.099044758 | 0.006102758 | 0.015186717 |             |             |             |
|                 | 0.009798561 | 0.013624705 | 6.96E-19    | 0           | 7.57E-19    | 0.000839247 | 0.02490628  |             |
|                 | 0.032156798 | 0.005766711 | 0.048567284 | 0.034392896 | 0           | 0.004181402 | 0.000911588 |             |
|                 | 0.002817706 | 0.080689679 | 0.00085096  | 0.564537223 | 0           | 0.053477109 | 8.27E-20    |             |
|                 | 0.003704356 | 0.103994217 | 0.028749942 | 0.059232264 | 0.036549783 | 0.005259052 |             |             |
|                 | 0.009635775 | 0.003444126 | 0.002553987 | 0.001816583 | 0.001326505 | 0           | 0.069685753 |             |
|                 | 0.054948144 | 4.64E-20    | 0           | 0.00178347  | 0.034497971 | 5.45E-19    | 5.85E-20    | 0.001156087 |
|                 | 0.001367206 | 7.63E-19    | 0.033694205 | 0           | 0.007116447 | 0.173407832 | 0.00311065  | 0           |
|                 | 3.14E-18    | 0           | 0.023082141 | 7.5E-20     | 0.164681102 | 2.14E-18    | 0.043722333 | 0.077330856 |
|                 | 0.005256328 | 0.029238634 | 0.067705222 | 0.096943855 |             |             |             |             |
| TCGA-IP-7968-11 | 0.145505268 | 2.35E-20    | 7.99E-21    | 0           | 0.129612398 | 0           | 0           | 0           |
|                 | 4.98E-18    | 0           | 0           | 2.21E-18    | 3.67E-18    | 6.74E-18    | 0.072660504 | 0.084002684 |
|                 | 0.004644458 |             |             |             |             |             |             |             |
|                 | 3.94E-19    | 0.002391415 | 0.015535724 | 0.042154329 | 0.003128583 | 0.819392768 | 6.8E-19     |             |
|                 | 0.092076663 | 0           | 0           | 0.24725168  | 0.304899674 | 0.386747139 | 0.027342335 | 0           |
|                 | 0.004379418 | 2.62E-19    | 0.003271093 | 0.010672174 | 4.3E-18     | 0           | 0.019807082 |             |
|                 | 0.032673654 | 0.011461388 | 0           | 0           | 0.037410375 | 1.51E-19    | 1.86E-18    | 0.001843324 |
|                 | 0.015514306 | 0           | 1.07E-18    | 0           | 4.73E-19    | 0           | 0.005927307 | 0           |
|                 | 8.55E-18    |             |             |             |             |             |             |             |
|                 | 0.377779467 | 3.34E-18    | 0.330994286 | 7.7E-19     | 0.03111621  | 0           | 0           | 0.032607396 |
|                 | 0.067115496 | 0.099722892 |             |             |             |             |             |             |
| TCGA-KB-A6F7-01 | 0.243390865 | 0           | 8.2E-18     | 0.074461611 | 0.33416634  | 5.09E-21    |             |             |
|                 | 9.83E-19    | 0           | 1.76E-18    | 0           | 0.001262425 | 0           | 0.036723117 | 6.48E-18    |
|                 | 0.079853277 |             |             |             |             |             |             |             |
|                 | 0.014712582 | 0.01335587  | 8.92E-18    | 0.021285955 | 0.00078128  | 0           | 0.414355295 |             |
|                 | 6.72E-18    | 2.11E-17    | 2.07E-17    | 0.012141778 | 2.44E-18    | 0.258164583 | 0.017096245 |             |
|                 | 0.000512911 | 0.056870863 | 0.05526757  | 0.018481671 | 0           | 5.61E-19    | 0.002545774 |             |
|                 | 0.024264966 | 0.065598335 | 0.003246247 | 5.3E-19     | 5.1E-18     | 9.29E-18    | 0.007319023 |             |
|                 | 0.001001468 | 0.013207175 | 0           | 0           | 0           | 0.065960332 | 0.014608549 | 0.0938123   |
|                 | 0.023800222 | 0.0161907   | 0           | 0           | 0.011600471 | 0.018580627 | 1.92E-18    | 0.209044103 |
|                 | 0           | 0.263850386 | 0.167087922 | 0           | 0.101745619 | 0.00039064  | 0.102136259 |             |
| TCGA-KB-A93G-01 | 0.170250136 | 6.28E-20    | 0.233667767 | 7.72E-19    | 1.53E-19    | 0           | 0.054989923 |             |
|                 | 1.83E-18    | 0.004505686 | 0           | 8.85E-20    | 0           | 0           | 0.158191972 | 0.179705187 |
|                 | 0.018705461 | 0           | 1.63E-19    | 0.017804302 | 0.1924483   | 0.000114208 | 0.329991423 | 0           |
|                 | 0.28321157  | 1.03E-18    | 0.003295488 | 0.163673311 | 0.389810567 | 0.018155034 |             |             |
|                 | 0.121637193 | 0.023715271 | 0.034374669 | 0.01073247  | 1.01E-19    | 0.00175945  |             |             |
|                 | 0.008939275 | 6.43E-19    | 0           | 0.000145004 | 0.159448595 | 0           | 0.094101654 | 0.092265303 |
|                 | 0.006639169 | 2.62E-18    | 0.000903329 | 0.040260852 | 0           | 0.037919118 | 0           | 5.2E-18     |
|                 | 0.270701719 | 1.28E-20    | 0           | 0.107337729 | 2.65E-18    | 0.028286249 | 0.00679833  |             |
|                 | 0.15676909  | 0           | 0.025014527 | 0.006841292 | 0.015250011 | 0.160895485 | 0.237829935 |             |
|                 | 0.39872542  |             |             |             |             |             |             |             |
| TCGA-KB-A93H-01 | 0.051573886 | 7.47E-19    | 8.54E-18    | 2.08E-22    | 0.077953848 | 2.94E-19    |             |             |
|                 | 2.22E-20    | 5.61E-18    | 2.6E-18     | 0           | 0.026438001 | 0.056680007 | 0.030291977 | 0           |
|                 | 0.002366193 | 0           | 0.007555526 | 0.016638563 | 3.53E-18    | 0           | 4.67E-20    | 0           |
|                 | 0.485997834 |             |             |             |             |             |             |             |
|                 | 1.51E-18    | 4.53E-19    | 4.76E-18    | 0.004244099 | 4.19E-19    | 0           | 0.047026285 | 0.00129907  |

0.008023394 0.01462574 0.004842932 0.00197659 0.002312322 7.36E-19  
 7.03E-19 0.076647499 0 1.93E-18 0 5.84E-18 3.17E-19 0.000387578 2.76E-18  
 0.001532777 0 2.56E-17 0.013923268 0 0.007240563 0.007225182 0.012029421  
 0 2.95E-18 0.016223291 0.026034547 7.09E-18 0.242593284 0 0.131794533  
 0.130855509 0 0.044453328 6.24E-19 0.044453328  
 TCGA-KB-A93J-01 0.217364796 3.72E-19 2.26E-18 0.108857483 0.00825809 0.003973271  
 0.025403414 0 0.007618167 7.7E-21 0.002775053 0.042670952 0.054296661  
 0.020372903 0.079978338 0 0.063124345 0.00317739 0 0.018510662  
 0.002745004 0.007962741 0.588422678 0 0 0.000691143 2.28E-19 0.008468472  
 0.150749039 0.049942219 0.009669704 0.094420978 0.081988928 0.047630788  
 0.006866686 0 0 0.022005213 0.041014345 3.9E-20 0.023646908 0  
 5.29E-19 0.005411204 0 0.00612548 0.000422979 0.001998758 0.011944149  
 0.051811956 2.23E-19 0.10587565 0.041598743 0.007703211 0.002456511 0  
 4.31E-19 0.017922582 1.95E-18 0.341813566 0.016488487 0.120940944 0.02794014  
 3.16E-19 0.211252994 0.001372502 0.212625496  
 TCGA-MX-A5UG-01 0.371053951 0 0.08787945 0.498330502 0 0.009991605  
 0.112144692 0 4.26E-19 0 0 0.040080579 0.072891806 0 0.132336997  
 0.114527233 0.178507134 4.96E-19 0.001944211 0.015625075 0.1260135  
 0.010045183 0.49921208 0 0.302258871 0.024187669 0.002985364 0.257159152  
 0 0.05048674 0.082464694 0.010487465 0.029405071 0.015785518 0.01088111  
 0.023973719 4.87E-18 0.214903685 0.002893648 0.054896976 0.020977933 0 0  
 0.060879736 1.63E-18 0.037890534 0.002354048 0 1.37E-17 0.023381283  
 3.62E-18 5.89E-19 0.10330658 0.013771396 0 0.037201648 0 0.030038144 0  
 0.234618572 0 0.002757535 0.011648686 0 0.404285232 0.214136185  
 0.618421417  
 TCGA-MX-A5UJ-01 0.160397714 0 0.052638324 0.036704172 0.028682201 1.1E-19  
 1.31E-19 0 0 1.24E-18 0.004334637 0 1.14E-18 0 0.016943956 0.037320494  
 0.018199437 0.008290682 4.53E-19 0.004917124 0.079301186 0 0.540203146  
 7.61E-21 0.134428432 6.69E-19 0.009254366 0.210538481 0.093996052 0.053250314  
 0.049957213 0.008981811 0.015145505 0.006744642 0.000850858 0.004183251  
 0.000979918 0.021069778 0.093222832 0.04722992 5.31E-19 6.67E-18 0.047447577  
 0.055777501 1.86E-19 0.007039634 0.000467674 0.001385824 0 0.046580864 0  
 0 0.075755059 0.01016556 0 0.054775835 9.35E-19 0.029303864 0.004659983  
 0.340204736 0 0.124454552 0.069103267 0 0.035226527 0.106864809  
 0.142091336  
 TCGA-MX-A663-01 0.145922463 0.098229318 0.166503009 4.55E-18 0.022964573  
 1.81E-20 8.91E-18 1.07E-18 0 2.09E-17 0.00025145 5.12E-18 5.58E-18 0 0  
 0.181383486 6.62E-18 0.000397076 0 0 0.139508254 0.000933776 0.433373061  
 9.61E-19 0.234031248 0 0.033093107 0.335225189 5.24E-18 0.025757652  
 0.086146558 0 0.007403887 0.011468928 4.2E-19 0.013256948 0 1.26E-17  
 0.069510237 0.05247437 0.024350065 3.96E-20 2.94E-18 0.079645435 0.011727189  
 2.59E-18 0.003680828 0.005132438 0 0.043430275 1.07E-18 0 0.214188237 0  
 0 0.035032309 1.62E-18 0.016511028 1.07E-19 0.272622622 0 0.087702981  
 0.016420167 1.91E-18 0.02027752 0.23588441 0.25616193

TCGA-MX-A666-01 0.067853923 2.4E-19 0 0.429997156 2.48E-18 0.005530059  
1.14E-18 2.73E-18 0 2.6E-17 0.01313405 0.001048488 0 1.32E-18 0.00275593  
2.65E-18 0.04612526 0.014641087 0.006642402 0 0.034921271 0.002583146  
0.500164573 0.002606804 0 0.003517883 0.011622677 0.023974056 0.00872092  
0.042750451 0.014710188 2.75E-21 0 0.012972371 0.017028523 0.005099636  
0.001067577 0.155215104 0.082924751 0.028021138 0 7.97E-19 0 0.029423383  
0.002874675 0.096719377 0.000991261 0 0 0.018778184 0.008598904  
0.003538312 0.010815737 0.027730768 0 7.95E-19 0.078686979 0.028506826  
9.78E-19 0.303955205 3.81E-18 0.112774258 0.152503101 0 0.300438208  
0.017460636 0.317898844

TCGA-R5-A7O7-01 0.125553911 0.001215411 0.042669894 0.020968331 0.128512184 0  
2.79E-19 1.19E-18 0 0 0.005289186 0 0 1.74E-18 0.009603812 0.012102507  
0.001111487 0.029646174 0 0 0.112951444 2.32E-18 0.572884716 0  
8.68E-18 0 0.003670147 0.160484677 9.56E-19 0.062711021 0.045418962  
0.003780797 0.012449768 0.002167791 0.007209311 0.0000896 0.000940604  
0.005040426 0.087873444 0.02443847 1.3E-17 3.79E-19 0.01138791 0.060631015  
0 8.68E-19 0.001179632 0 4.18E-20 0.072338187 7.7E-18 0.000948031  
0.12549837 0.021710461 0 0 0.003183985 0.076798509 0 0.214244936 0  
0.15024041 0.171625409 0 0.021305626 0.057083427 0.078389053

TCGA-R5-A7ZE-01 0 0 2.04E-17 0 0.055810559 1.28E-19 0 3.95E-18 3.36E-17  
3.99E-18 0 0 3.94E-21 5.44E-19 0.023734709 0 5.33E-19 0.003230361  
3.98E-18 7.62E-19 0.030908587 0 0.780240867 0 0 0 5.51E-20 0.007879494  
0.03332726 0.352909742 0.020944603 0 0 0 0 0.002857844 1.92E-18 0  
0.084084055 0.013215973 0 7.24E-19 6.48E-18 0.030155081 8.85E-19 0  
0.000553695 0.01636808 1.04E-17 0.031150445 1.84E-17 0.013042854 0  
0.001867059 2.03E-19 1.94E-17 0.006568567 0.363060366 0 0.255081649 0  
0.164619436 0.129434839 0 0.010912053 0.015454293 0.026366347

TCGA-R5-A7ZF-01 0 0 3.62E-19 6.25E-19 0.087471351 0.004443322 0 2.29E-20 0  
3.26E-17 0.010752249 0 1.54E-18 0 0.006692919 0 0.008170493 0.02586396  
1.11E-17 1.24E-18 0.004395227 4.9E-19 0.588908853 6.44E-19 1.24E-17 6.31E-19  
0.001287704 0.002341587 0.040020476 0.13263422 0.004821472 3.49E-19 0 0  
2.68E-19 0.000923801 0.000806421 2.63E-19 0.109234192 0.009541477 0 0 0  
0.010886587 0.005538775 0.000880069 0.001388793 0 1.66E-17 0.030680566  
0.031582384 0.038390851 0.000630017 0.00629393 1.3E-18 7.46E-18 0.011342942  
0.069612689 3.57E-19 0.306566005 4.56E-17 0.257729876 0.229530117 0  
1.31E-17 0.002197613 0.002197613

TCGA-R5-A7ZI-01 0.501772073 6.62E-20 3.07E-18 0.225754573 0.194804231 0.004635434  
0.03673624 0 1.02E-17 1.33E-18 0.030921629 0.138670981 0.214724537  
0.023613599 0.11093176 0 0.081607215 0.020445765 0 0.047577487  
0.016910064 0 0.35653889 0 0 0 0.002331791 0.019810551 0.175464871  
0.027467742 0.008478943 0.120554978 0.13779579 2.11E-19 0.018360159 0  
0.006413628 0.077799517 0.133037721 0.010467264 0.015147663 0 1.94E-19  
0.027735253 2.26E-18 0 0.000820285 0 7.22E-20 0.145273483 2.25E-18  
0.090101974 0.040831552 0.055618263 0 1.83E-18 0.023486763 0.037214749 0

0.225515281 0 0.342328932 0.282554229 0.008018986 0.377377227 0.008455032  
 0.385832259  
 TCGA-R5-A7ZR-01 0.089299724 2.36E-19 1.35E-17 0.048287015 0.010826153 0.004876563  
 0 0 7.84E-18 0 0.014712009 6.48E-19 0.015970982 3.96E-18 0.014860825 0  
 0.024783569 0.012743609 0 0.001210791 0 0.002158987 0.581701252 0  
 4.4E-18 0 0.014914704 0.046107962 0.073440316 0.055183982 0.004472925  
 0.014994117 0.018086179 0.010765221 0 0.00222314 0 0.036372885  
 0.098369573 0.016724886 0 8.58E-18 1.49E-17 0 0 0 0.000876284  
 0.004278229 0 0.029503183 0 0.017085045 0 0.049692843 2.7E-18 0 0  
 0.028511443 0 0.270138608 3.43E-18 0.188206199 0.094805929 6.73E-18  
 0.047286092 2.32E-18 0.047286092  
 TCGA-R5-A805-01 0.176772897 1.53E-19 0.02113376 0.070404154 0.044959652  
 0.002295458 2.02E-20 2.13E-18 0 0 6.38E-20 0 0.003071983 0 0.066688659  
 0.001744333 0.040983542 0.006783697 0.001050985 0.026453915 0.087687199 0  
 0.6443294 0.002329966 0 0.00394415 0.0048198 0.083650023 0.338630118  
 0.078434736 0.036069998 0.046726555 0.033668068 0.032791813 0.011938159  
 0.003129451 1.2E-19 0.023070587 0.022948938 0.040538299 0.213433111  
 1.52E-17 0 0.031892478 0.002194038 0 0.000142186 0.106626256 0 0  
 1.26E-17 0.058025223 0.067883693 0.008715182 3.16E-18 1.86E-20 6.46E-19  
 0.060704912 0 0.289237279 0.010293989 0.003974023 0.044560358 7.53E-19  
 0.317054766 0.0438436 0.360898366  
 TCGA-RD-A7BS-01 0.263424951 4.71E-21 0.026085239 0.182309668 0.05674078  
 1.47E-20 0 0 0.002371797 8.84E-19 0.002781476 0 0.019100598 0  
 0.016039382 0.044017745 0.026708509 0.014271026 0.000219105 0.004454849  
 0.024243249 1.23E-19 0.811453378 1.65E-19 0.04211388 0 0.004464685  
 0.136474951 0 0.339410599 0.022233591 0.007090836 0.011686992 0  
 0.008091179 0.009144932 0.000606497 0.084748375 0.054068409 0.067360271  
 0.018934634 0 3.52E-18 0.015736963 0 0.021210848 0.002120919 0.006121749  
 0 0.009777282 0 0.028917744 0 0.014802781 6.39E-20 0 0.010215338  
 0.27950323 0.000924223 0.330707216 6.51E-18 0.089218884 0.029433815  
 5.16E-18 0.151335278 0.033178565 0.184513842  
 TCGA-RD-A7BT-01 0.100096699 0 9.19E-18 0.016098162 0.048348812 0.017411973 0  
 2.2E-18 6.03E-19 0 0.006583671 1.18E-20 0.000559853 1.51E-17 0.015143781 0  
 0.006882687 0.025116796 3.52E-18 0.0000364 0 0 0.531849356 4.03E-19 0  
 1.33E-17 0.005020331 0.043623399 9.05E-18 0.060003014 0.001135508 0.002611118  
 0.013721019 0.013523704 0.000500094 3.83E-20 4.51E-18 0.013319694 0.13609193  
 0.004434789 0 0 1.54E-17 0 3.8E-20 3.5E-20 0.002350209 0.004443875  
 5.26E-18 0.116484002 0.008438844 0.011532425 0.009666133 0.023905622  
 3.33E-18 0 0 0.035192904 0 0.27108484 0 0.157306975 0.151102587  
 2.26E-18 0.015793092 0 0.015793092  
 TCGA-RD-A7BW-01 0.404250894 0.007670011 0.119216355 0 3.2E-18 0 0.023993725  
 0 5.31E-18 0 0.031973426 0.215988238 0.14796464 0.040392046 0.141554308  
 0.195765624 0.008549558 0.0106764 0.003034129 0.021831179 0.105116453  
 1.09E-19 0.315981833 0 0.392111781 0.006572498 4.37E-21 0.398553517

|                 |             |             |             |             |             |             |                   |
|-----------------|-------------|-------------|-------------|-------------|-------------|-------------|-------------------|
|                 | 0.053521973 | 0.011996546 | 0.07282793  | 0.052565214 | 0.042964243 | 0.020140319 |                   |
|                 | 2.09E-20    | 0.018353575 | 0.010235074 | 3.15E-18    | 0.019505813 | 0.081081506 | 0.018068899       |
|                 | 6.34E-19    | 0           | 0.042753302 | 0.013695494 | 0           | 0.016354483 | 5.77E-20 6.85E-21 |
|                 | 0.172743453 | 0           | 0.000899826 | 0.174080034 | 1.25E-18    | 0           | 1.07E-17 1.31E-17 |
|                 | 0.010796614 | 0.000373188 | 0.484212946 | 0           | 0.051475918 | 0.080639501 | 1.15E-19          |
|                 | 0.205635688 | 0.252449122 | 0.45808481  |             |             |             |                   |
| TCGA-RD-A7C1-01 | 0.307192773 | 3.09E-19    | 4.4E-19     | 0.101556734 | 0.197766479 | 1.65E-20    | 0                 |
|                 | 7.69E-18    | 3.79E-18    | 2.29E-18    | 0.03146601  | 0.05360805  | 0.061294086 | 0                 |
|                 | 0.068720959 | 1.99E-18    | 0.030973404 | 0.02906593  | 1.2E-18     | 0.019340983 | 0.036609982       |
|                 | 1.85E-18    | 0.42755188  | 8.65E-20    | 0           | 0           | 0.00340911  | 0.056901322       |
|                 | 0.11133566  | 0.033437471 | 0.024125108 | 0.073483836 | 0.073266928 | 0.047500895 | 0.008526725       |
|                 | 0.004835018 | 0.002984411 | 0.026844479 | 0.140723473 | 0.012658333 | 0.044025885 | 6.18E-18          |
|                 | 0.084815594 | 0.030014368 | 1.78E-19    | 0           | 0.000789084 | 0.030075843 | 1.72E-17          |
|                 | 0.02077271  | 5.17E-18    | 0.092492572 | 1.87E-19    | 0.019038294 | 0           | 0.004403838       |
|                 | 0.040129    | 0.029433123 | 0.000166504 | 0.269274324 | 4.59E-20    | 0.278091829 | 0.198948375       |
|                 | 0           | 0.220412038 | 0.018304991 | 0.238717029 |             |             |                   |
| TCGA-RD-A8MV-01 | 0.402087467 | 0           | 3.89E-18    | 0.299661407 | 0.121685425 | 0.012286539 |                   |
|                 | 0.036434479 | 8.01E-20    | 0.008769199 | 1.76E-18    | 0.010603246 | 0.056920874 | 0.118624682       |
|                 | 0           | 0.053021259 | 2.41E-18    | 0.067112688 | 0.006395633 | 1.17E-18    | 0.020608142       |
|                 | 0.031163382 | 1.16E-18    | 0.599181398 | 0           | 2.87E-18    | 0           | 0.00609292        |
|                 | 0.076184669 | 0.015535608 | 0.061313414 | 0.020227409 | 0.047324936 | 0.047727005 | 0.038705641       |
|                 | 0.013519396 | 0.012532645 | 6.19E-18    | 0.113570392 | 0.053483835 | 0.016424554 |                   |
|                 | 0.094381834 | 6.86E-19    | 4.47E-18    | 0.021844075 | 0           | 0.030590596 | 0                 |
|                 | 0.02652481  | 0           | 0.018404489 | 1.25E-17    | 0.106784548 | 0.042790356 | 0.043620254       |
|                 | 1.81E-19    | 0           | 0.02607103  | 0.043527948 | 7.05E-19    | 0.209697764 | 0                 |
|                 | 0.116289794 | 0.090375988 | 0           | 0.372627599 | 0.015581691 | 0.388209291 |                   |
| TCGA-RD-A8MW-01 | 0.303854054 | 0.003677827 | 0.092328874 | 0.151413691 | 0.147097137 |             |                   |
|                 | 0.007366412 | 1.61E-18    | 1.86E-18    | 0.011221124 | 0.004993186 | 0.002046414 | 0.019509158       |
|                 | 0.034533545 | 0           | 0.07757883  | 0.024664839 | 0.057996717 | 0.008525436 | 3.94E-18          |
|                 | 0.029313751 | 0.031313317 | 3.88E-19    | 0.456051474 | 0           | 0.124655223 | 1.23E-19          |
|                 | 0.009069524 | 0.048295262 | 0.225921863 | 0.033029379 | 0.016445627 | 0.106230751 |                   |
|                 | 0.086758383 | 0.025235201 | 0.007505529 | 0           | 0.006669477 | 0.031821064 | 0.054981379       |
|                 | 0.024812586 | 0.049831928 | 2.02E-19    | 0.083988044 | 0.0159958   | 7.17E-19    | 1.08E-17          |
|                 | 0.001077101 | 0           | 0           | 0.032842014 | 0           | 0.086887177 | 0.139145717       |
|                 | 0.076586772 | 2.35E-18    | 0           | 0.04271064  | 0.059758037 | 0.004740696 | 0.284996127       |
|                 | 0           | 0.094564694 | 0.077058655 | 0.026807421 | 0.242536539 | 0.079823183 | 0.322359722       |
| TCGA-RD-A8N0-01 | 0.359275845 | 0           | 0           | 0.799773358 | 4.28E-17    | 0.089092032 | 0.091035311       |
|                 | 0.003738546 | 0.021826103 | 0           | 0.039171302 | 0.181550234 | 0.211192019 | 0.017066724       |
|                 | 0.138955722 | 0.06165796  | 0.235027726 | 0.007193991 | 0.001737749 | 0.022673786 |                   |
|                 | 0.021338886 | 5.44E-21    | 0.47163736  | 0           | 0.136799954 | 0.033188188 | 1.8E-19           |
|                 | 0.222585281 | 0.067005463 | 0.028541879 | 0.015315702 | 0.008814912 | 0.009573938 |                   |
|                 | 0.008251402 | 0.031965374 | 0.006677562 | 5.35E-18    | 0.308591297 | 0.023292636 |                   |
|                 | 0.008410117 | 1.55E-19    | 8.48E-18    | 0           | 0.011641539 | 8.02E-19    | 0.067137573       |
|                 | 0.004365948 | 0           | 0           | 0.007197623 | 3.09E-18    | 0.024091179 | 0                 |
|                 | 0.09276615  | 1.66E-18    | 0.018685337 |             |             |             |                   |

|                 |             |             |             |             |             |             |             |             |
|-----------------|-------------|-------------|-------------|-------------|-------------|-------------|-------------|-------------|
|                 | 0.034762597 | 0.02584482  | 0           | 0.392467269 | 0           | 0.000183984 | 0.09576277  | 0           |
|                 | 0.699010807 | 0.07906942  | 0.778080227 |             |             |             |             |             |
| TCGA-RD-A8N1-01 | 0.378223762 | 4.21E-19    | 0.032798817 | 0.414221316 | 3.43E-19    | 0.04248365  |             |             |
|                 | 0.127599255 | 0.031145139 | 0.062872263 | 9.78E-19    | 0.003636692 | 0.117086192 |             |             |
|                 | 0.12629536  | 0.033913764 | 0.109428771 | 0.013868261 | 0.113658777 | 0           | 1.89E-19    |             |
|                 | 0.045980036 | 0.023571737 | 0.030182147 | 0.472702249 | 0           | 0.083572879 | 0.008575272 |             |
|                 | 0.002655394 | 0.115409929 | 0.236230411 | 0.033201874 | 0.014539254 | 0.037713513 |             |             |
|                 | 0.031007587 | 0.023319602 | 0.018319033 | 0.004082811 | 3.77E-20    | 0.146143739 |             |             |
|                 | 0.035484617 | 0.028937587 | 0.022755463 | 0           | 7.55E-18    | 0.014152811 | 0           | 0.039358779 |
|                 | 0.001074998 | 1.73E-19    | 2.56E-18    | 0.017862284 | 4.06E-19    | 0.027748668 | 0.032810637 |             |
|                 | 0.026865415 | 9.67E-20    | 0.01103819  | 0.032245308 | 0.022045082 | 0           | 0.354166613 | 0           |
|                 | 0.039019368 | 0.102827919 | 0           | 0.47826856  | 0.053572308 | 0.531840868 |             |             |
| TCGA-RD-A8N2-01 | 0.27214608  | 0           | 0.021446316 | 0.016960935 | 7.35E-20    | 0           | 0.024787995 |             |
|                 | 0.002332807 | 0.020576595 | 0           | 0.013302002 | 0.06636937  | 0.016125568 | 1.51E-18    |             |
|                 | 0.221224053 | 0.16292411  | 0.013805565 | 0.011947653 | 0.00871864  | 0.01770458  |             |             |
|                 | 0.044578744 | 0.001156567 | 0.032626918 | 0           | 0.464039626 | 0.008331417 | 0.001266301 |             |
|                 | 0.366523541 | 0.013412177 | 0.001181747 | 0.029840198 | 0.005715873 | 0.010138068 |             |             |
|                 | 0.00841635  | 0           | 0.012577308 | 0           | 4.65E-18    | 0           | 0.011699064 | 0.007755657 |
|                 | 0.01361971  | 0.03019836  | 1.82E-19    | 0.025895281 | 0.001371095 | 8.05E-18    | 0.008096368 |             |
|                 | 1.17E-18    | 9.75E-19    | 0.040094268 | 0           | 0.012690454 | 0.005116279 | 0           | 0           |
|                 | 0.689069171 | 0           | 0           | 0.04436428  | 1.13E-19    | 0.079577923 | 0.254309185 | 0.333887108 |
| TCGA-RD-A8N4-01 | 0.311430264 | 0.002133738 | 3.14E-18    | 0.028778429 | 0.162126709 | 0           |             |             |
|                 | 0.002383658 | 0           | 0.020955034 | 2.3E-18     | 0.015130876 | 0.04379543  | 0           | 5.29E-18    |
|                 | 0.05059658  | 0.153127042 | 0.020362638 | 0.000837064 | 1.53E-18    | 0.010898626 |             |             |
|                 | 0.061095032 | 0           | 0.090277738 | 0           | 0.440638931 | 0           | 0.006884578 | 0.351958824 |
|                 | 0.004942426 | 3.42E-20    | 0.043820098 | 0           | 0.010865131 | 0.000159104 | 0           | 0.009143396 |
|                 | 0           | 8.63E-20    | 0.008010031 | 0.02244849  | 0           | 0           | 0.033863153 | 0.016625906 |
|                 | 5.52E-20    | 0.03104657  | 1.99E-20    | 6.47E-18    | 0.09966587  | 2.5E-17     | 8.24E-18    | 0.042369308 |
|                 | 0.009090551 | 1.04E-18    | 0           | 3E-17       | 0           | 0           | 0.582590887 | 0           |
|                 | 0.01883816  | 2.07E-18    | 0.055648323 | 0.25193385  | 0.307582174 |             |             |             |
| TCGA-RD-A8N5-01 | 0.037619501 | 0           | 0.132621697 | 6.54E-19    | 4.61E-18    | 3.31E-19    | 0.00092965  |             |
|                 | 3.13E-18    | 4.67E-20    | 0           | 2.96E-19    | 1.16E-18    | 0           | 0           | 0.131329214 |
|                 | 0.020043879 | 0.001802748 | 0           | 0.011509621 | 0.121656835 | 0.000540835 | 0.547064556 |             |
|                 | 0           | 0.143521459 | 0           | 0.004363114 | 0.186777784 | 0.415837698 | 0.065111017 |             |
|                 | 0.06782895  | 0.030612102 | 0.035941356 | 0.022989462 | 0           | 0.007203126 | 0.006921302 |             |
|                 | 0           | 0.008473884 | 0.04014024  | 0.152520301 | 3.53E-19    | 0.030222784 | 0.060027804 |             |
|                 | 9.98E-19    | 0           | 0.000805645 | 0.041987849 | 6.16E-18    | 0.053765032 | 0           | 1.89E-18    |
|                 | 0.082063512 | 0.001199663 | 0           | 0.040439463 | 1.89E-18    | 0.061799411 | 0.00267382  |             |
|                 | 0.358687329 | 0           | 0.033287024 | 0.008182885 | 0           | 0.158113805 | 0.132589147 |             |
|                 | 0.290702952 |             |             |             |             |             |             |             |
| TCGA-RD-A8N6-01 | 0.087212283 | 0.005223488 | 0.048611054 | 0           | 0.05843464  | 0           |             |             |
|                 | 1.08E-18    | 0           | 0.008839084 | 0           | 0.001101843 | 7.27E-21    | 0           | 0           |
|                 | 0.054847554 | 0           | 0.0104984   | 2.01E-20    | 0.001239891 | 1.05E-18    | 0           | 0.482190638 |
|                 | 2.23E-19    | 0.122368742 | 0           | 0.010868528 | 0.096624706 | 0.051627048 | 0.030326451 |             |

|                 |             |             |             |             |             |             |             |             |             |
|-----------------|-------------|-------------|-------------|-------------|-------------|-------------|-------------|-------------|-------------|
|                 | 4.99E-20    | 0.002998411 | 0.010282653 | 0           | 5.5E-19     | 0.000870184 | 1.84E-18    | 2.68E-18    |             |
|                 | 0.021100711 | 0.035190192 | 0           | 0           | 0           | 7.24E-19    | 0.001025497 | 0           | 0.0119767   |
|                 | 0.000316799 | 0           | 0           | 0           | 0.006327463 | 0.086918139 | 0.015448509 | 3.26E-18    | 0           |
|                 | 0.027283533 | 1.91E-18    | 0.464693404 | 7.22E-18    | 0.028439303 | 0.071967795 | 4.78E-18    |             |             |
|                 | 0.003036734 | 0.063796115 | 0.066832849 |             |             |             |             |             |             |
| TCGA-RD-A8N9-01 | 0.332131686 | 5.16E-20    | 0.075958371 | 0.04483188  | 0           | 0           | 0.039925396 |             |             |
|                 | 0.001288953 | 0           | 1.26E-17    | 0.011690868 | 0.052729208 | 0.027254189 | 0           | 0.052435773 |             |
|                 | 0.103094425 | 0.034084292 | 0.007132231 | 0.002434269 | 0.018717552 | 0.17466162  |             |             |             |
|                 | 0.002301611 | 0.350588561 | 4.8E-21     | 0.264820969 | 0.031156786 | 0.002892979 |             |             |             |
|                 | 0.31993363  | 0.036185937 | 0.022008873 | 0.092793349 | 0.046248679 | 0.044062003 |             |             |             |
|                 | 0.040719604 | 0.007754039 | 0.011444101 | 0           | 0           | 0.044894124 | 0.030574669 |             |             |
|                 | 0.000508034 | 0           | 0           | 0.087532434 | 0           | 0           | 0.002281156 | 0           | 0.014460642 |
|                 | 1.66E-18    | 0.148855014 | 0.01827014  | 3.46E-20    | 0.089089032 | 8.18E-18    | 0.025316103 |             |             |
|                 | 0.001276344 | 0.363108373 | 0           | 0.075647105 | 0.041172672 | 5.44E-19    | 0.116253305 |             |             |
|                 | 0.219741294 | 0.335994599 |             |             |             |             |             |             |             |
| TCGA-RD-A8NB-01 | 0.305673382 | 1.45E-19    | 7.58E-19    | 0.131138794 | 0.036852887 | 0.01202961  |             |             |             |
|                 | 0.016446421 | 0.007259996 | 0           | 0           | 0.007679699 | 0.023720802 | 0.059550261 |             |             |
|                 | 0.000327475 | 0.052793342 | 0.046051816 | 0.069119956 | 0.008229027 | 8.85E-20    |             |             |             |
|                 | 0.019938213 | 0.043020676 | 1.62E-19    | 0.569028508 | 1.84E-20    | 0.115685891 | 0           |             |             |
|                 | 0.002912541 | 0.135613054 | 0.080724962 | 0.07489473  | 0.024078412 | 0.019763212 |             |             |             |
|                 | 0.037975987 | 0.002022301 | 0.012692397 | 0.009645345 | 1.65E-18    | 0.030152586 |             |             |             |
|                 | 0.049480001 | 0.02419182  | 0.022841239 | 1.8E-20     | 0           | 0.024676946 | 7.58E-20    |             |             |
|                 | 0.019445514 | 0.000543585 | 0.00583265  | 0           | 0.019457559 | 2.17E-18    | 0.050314954 |             |             |
|                 | 0.031778464 | 0.009655543 | 0.004584015 | 0.019289094 | 0           | 0.029544365 | 0           |             |             |
|                 | 0.545297079 | 2.06E-18    | 0.07011696  | 0.226741347 | 2.9E-18     | 0.162124868 | 0.079353284 |             |             |
|                 | 0.241478152 |             |             |             |             |             |             |             |             |
| TCGA-SW-A7EA-01 | 0.121410972 | 0.003171378 | 0.064571585 | 0.027504061 | 0.097924274 |             |             |             |             |
|                 | 0.005621092 | 0           | 0           | 0           | 0.018244335 | 0.007215096 | 0.053267166 | 0.008698848 |             |
|                 | 0.021526755 | 2E-18       | 0.024766712 | 0.004872701 | 0           | 7.35E-20    | 0           | 7.47E-18    |             |
|                 | 0.715259823 | 1.47E-18    | 0.039507829 | 0           | 0           | 2.35E-19    | 0           | 0.116363256 | 5.95E-19    |
|                 | 0.023410555 | 0.029140406 | 0.006913121 | 0.002933924 | 5.35E-21    | 9.39E-21    | 0           |             |             |
|                 | 0.066680181 | 0.055641678 | 0           | 1.18E-18    | 0.087355258 | 0           | 0           | 5.2E-20     | 0.000181598 |
|                 | 5.25E-20    | 3.37E-18    | 0.038483365 | 0           | 0.065416546 | 0.054413248 | 0.015545325 | 0           |             |
|                 | 3.24E-19    | 0.001405339 | 0.037519915 | 4.67E-19    | 0.231576744 | 0           | 0.204467485 |             |             |
|                 | 0.227717842 | 0           | 0.040709091 | 0.021339603 | 0.062048694 |             |             |             |             |
| TCGA-SW-A7EB-01 | 0.2355604   | 0           | 0.014409014 | 0.197131105 | 0.062800329 | 0.003492363 |             |             |             |
|                 | 0.001955049 | 8.18E-20    | 0.007397351 | 1.32E-17    | 0.013013291 | 0           | 0.013973612 | 0           |             |
|                 | 0.007209698 | 0           | 0.021742918 | 0.003554022 | 0           | 0.001744215 | 6.89E-19    | 1.68E-19    |             |
|                 | 0.569138133 | 0           | 0           | 0           | 0.03240839  | 0.065728321 | 2.72E-18    | 0.04166849  |             |
|                 | 0.006018747 | 0           | 0.010548526 | 0.009279731 | 0.001389515 | 0.000874934 | 0           |             |             |
|                 | 0.105717873 | 0.103163815 | 0.037405835 | 0.019747315 | 1.49E-18    | 1.54E-17    | 1.49E-19    | 0           |             |
|                 | 0.038649683 | 0.002267592 | 9.26E-20    | 0           | 0.023397754 | 1.92E-17    | 0.021593233 |             |             |
|                 | 0.010088118 | 0.027813377 | 0           | 0           | 0.028570943 | 0.032748133 | 8.69E-19    | 0.275775794 |             |
|                 | 1.06E-17    | 0.129339551 | 0.055271274 | 0           | 0.146674767 | 3.45E-19    | 0.146674767 |             |             |

TCGA-VQ-A8DT-01 0.02601053 0 2.35E-18 0.014264047 0.002893744 0.006119861 0  
0.0000585 3.3E-19 3.18E-20 0.008391508 0.001322895 0.011641042 4.83E-19  
0.014522327 3.31E-19 0.012501431 0.017702009 0 0.00035818 0 0.002671663  
0.671408789 0.000121091 0 0 0.002447193 0.034985304 0.040271021  
0.09920578 0.000984465 0.007267279 0.006482931 0.009420956 0.0120958  
0.00324372 0 0.010331729 0.089109995 0.0000924 2.12E-19 0 1.39E-17 0  
0 0 0.000588706 0.003976686 1.06E-19 0.010875323 9.12E-18 0.007971051  
1.19E-17 0.013747646 0.001937131 1.71E-18 0.009299472 0.070041798 0  
0.257712607 3.64E-18 0.079692002 0.145359351 9.84E-18 0.028010065 0  
0.028010065

TCGA-VQ-A8DU-01 0.064050011 0.004603138 0.079887566 1.4E-19 0.045131458  
4.83E-20 0 0 0 1.01E-17 0.010690486 0.01471207 0 0 0.014100151  
0.048226454 0.004185104 0.018861833 0 2.11E-18 0.000605263 7.61E-20  
0.519552364 3.74E-22 0 9.45E-19 0.00441275 0.136184417 0 0.036610632  
0.011821236 1.64E-18 0.007781979 6.32E-19 0.004767936 0.001167481 0.000667539  
0 0.067121399 0.062061563 5.8E-18 3.44E-18 4.79E-18 0.00067241 1.98E-18  
1.22E-20 0.003641299 0 2.59E-19 0.019053806 0 0.01180387 0.001402277  
0.005605685 0 0 0.018616942 0.031681319 3.28E-18 0.444624861 1.9E-17  
0.111716012 0.1594472 5.9E-18 0.012986671 0.0026042 0.015590871

TCGA-VQ-A8DV-01 5.71E-19 0.036962043 7.63E-18 0 0.03293748 1.24E-19 2.66E-18  
7.16E-19 1.31E-17 0 0.010601912 0.012050427 1.65E-18 7.57E-18 0.00164675  
1.03E-18 2.3E-19 0.016242218 0 0 0.019740227 0 0.332684087 0.003564456  
0 0 0.105951338 0.074325023 0 0.023390815 0.014908064 0 0  
0.001384384 0.008602025 0 6.67E-19 0.00614617 0.100690088 0.018904108  
0.013230533 3.78E-18 0 0.015907757 0.009301407 0.001844428 0.005901464  
0.005373103 1.03E-17 0.022285547 0.001712759 0.020259325 2.5E-17 0.018884718  
0 8.93E-19 0.014866612 0.007039667 0 0.3584285 0 0.122882018  
0.128160504 0 0.026170726 0.028351135 0.054521861

TCGA-VQ-A8DZ-01 0.050980202 0.005383993 0 6.57E-19 0.091479331 0 1.85E-19 0  
7.49E-19 0 0.012732903 0 0 0 0.00947156 0.007279517 0 0.010076869  
2.64E-18 0.002270636 0.055497149 0.003166909 0.642673041 5.05E-19 0  
1.92E-19 0.013375468 0.045839501 0.101812954 0.085600544 0.036802321  
0.008228104 0.012656969 0.020917728 0.007055432 0.00279811 0.001381227  
0.00242922 0.118094479 0.053680676 0 0 0 0.041505429 0.00055624  
1.58E-20 0.00104271 0.006649462 4.3E-18 0.061419556 0.002877582 0.003811729  
0.038029166 0.00981244 9.72E-19 7.73E-19 0 0.033861894 0 0.226483092  
8.34E-18 0.115402395 0.013979116 0 0.018247029 0.030440571 0.0486876

TCGA-VQ-A8EO-01 0.130677863 0 5.03E-18 0.037935889 1.13E-18 0.003239838 0 0  
0.020608041 0.035428564 0.004157859 0 2.98E-19 4.49E-18 0.052434056  
4.02E-18 0.038444208 0.009802856 4.15E-19 0.008442391 0.032047106 0.00221963  
0.507820689 0 0 0 0.00259438 0.034901813 0.060531553 0.039684285  
0.020044616 0.028759168 0.027934843 0.028647042 0.004082566 0.004017718  
9.78E-18 0.002713308 0.059513728 0.00256949 0.031174363 0 2.34E-17  
0.026962674 0.002020386 0.001171105 0.001581182 0.012504706 8.12E-19

|                 |             |             |             |             |             |             |             |             |             |          |
|-----------------|-------------|-------------|-------------|-------------|-------------|-------------|-------------|-------------|-------------|----------|
|                 | 0.07041896  | 0           | 0.008388327 | 0.015259307 | 0.019069865 | 7.97E-20    | 0           | 2.55E-18    |             |          |
|                 | 0.02677742  | 0           | 0.297279241 | 4.37E-18    | 0.09100754  | 0.056564226 | 0.00134524  |             |             |          |
|                 | 0.083412476 | 0.016023553 | 0.099436029 |             |             |             |             |             |             |          |
| TCGA-VQ-A8E2-01 | 0.062457349 | 0.01076777  | 0.152803585 | 3.12E-18    | 0.12885442  | 0           | 0           |             |             |          |
|                 | 0           | 0           | 9.54E-18    | 0.002903971 | 0           | 0           | 0           | 0.018893135 | 0.079746759 | 3.18E-18 |
|                 | 0           | 0           | 0.039613164 | 6.87E-19    | 0.369867884 | 0           | 0.02909753  | 9.39E-18    | 0.003367125 |          |
|                 | 0.115174812 | 0.024179129 | 0.021555007 | 0.022740948 | 1.53E-19    | 0.004877729 |             |             |             |          |
|                 | 0.001591547 | 8.34E-21    | 0           | 0.004759809 | 2.74E-18    | 0.054548282 | 0.098957511 | 0           | 0           |          |
|                 | 0.063927973 | 0.031032925 | 0           | 0           | 0.008971167 | 0           | 0           | 0.01460193  | 0.004130334 |          |
|                 | 0.049724192 | 0.09701     | 0.001177427 | 0           | 2.72E-19    | 0           | 0.01504335  | 1.85E-19    |             |          |
|                 | 0.337867904 | 9.8E-18     | 0.10053964  | 0.097875101 | 1.07E-17    | 2.65E-18    | 0.039739232 |             |             |          |
|                 | 0.039739232 |             |             |             |             |             |             |             |             |          |
| TCGA-VQ-A8E3-01 | 0.255078474 | 0           | 2.43E-17    | 0.089776222 | 0.229842659 | 0.019454201 |             |             |             |          |
|                 | 7.43E-21    | 0           | 8.34E-18    | 4.75E-18    | 0.00716228  | 0.025226778 | 0.073377261 | 0           |             |          |
|                 | 0.028949882 | 1.29E-18    | 0.057026072 | 0           | 0           | 0.007729323 | 0.014470228 | 0           |             |          |
|                 | 0.595443371 | 5.84E-19    | 6.76E-19    | 0           | 0.001561818 | 0.026428929 | 0           | 0.064173901 |             |          |
|                 | 0.009964627 | 0.016318475 | 0.02242316  | 0.016754671 | 0.01468876  | 0           | 0           |             |             |          |
|                 | 9.18E-21    | 0.077772831 | 0           | 0           | 0           | 8.91E-18    | 0.009012005 | 0           | 0.000217396 |          |
|                 | 0.001153607 | 0           | 1.78E-18    | 0.010986609 | 0           | 0.042015361 | 0.039944558 | 0.018959763 |             |          |
|                 | 7.53E-19    | 0           | 0.024076438 | 0.033026012 | 1.1E-17     | 0.29607301  | 0.003202915 |             |             |          |
|                 | 0.232895093 | 0.173702677 | 0           | 0.102493038 | 0.007235114 | 0.109728152 |             |             |             |          |
| TCGA-VQ-A8E7-01 | 0.020486968 | 7.93E-19    | 1.51E-19    | 1.92E-18    | 0.015101817 | 0           | 6.68E-18    | 0           |             |          |
|                 | 0.007956107 | 4.99E-18    | 0.000792806 | 3.39E-19    | 2.39E-19    | 5.47E-19    | 0.013206648 |             |             |          |
|                 | 0.007098153 | 2.51E-20    | 0.003785109 | 6.28E-19    | 0.000143444 | 0.015848128 | 0.019059448 |             |             |          |
|                 | 0.684426699 | 0           | 0           | 3.54E-18    | 0.00567589  | 0.067388631 | 0.102392176 | 0.225992348 |             |          |
|                 | 0.010184511 | 0           | 0.005220824 | 0.002938008 | 0.008657221 | 0.004493565 | 3.36E-18    | 0           |             |          |
|                 | 0.054069778 | 0.04604422  | 9.08E-19    | 0           | 2.2E-18     | 0.01458531  | 6.92E-19    | 9.09E-19    |             |          |
|                 | 0.001153737 | 0.000921724 | 0           | 0.037247943 | 1.1E-18     | 0           | 0.048926106 | 0.002521565 |             |          |
|                 | 3.99E-19    | 7.35E-20    | 0           | 0.143594543 | 0           | 0.205700809 | 3.14E-18    | 0.068274204 |             |          |
|                 | 0.065686498 | 1.41E-18    | 0.019187891 | 0.007924064 | 0.027111955 |             |             |             |             |          |
| TCGA-VQ-A8P2-01 | 0.009815822 | 0           | 3.95E-18    | 0.004706    | 0.036385005 | 0.012628656 | 0           |             |             |          |
|                 | 9.16E-20    | 0           | 1.06E-17    | 0.012925709 | 0           | 0.002771061 | 2.64E-18    | 0.015602165 | 0           |          |
|                 | 0.013920752 | 0.025334888 | 0           | 0           | 0.004117135 | 0           | 0.511023855 | 0.000328555 | 0           |          |
|                 | 0           | 0.000244173 | 0.023718572 | 0.078533923 | 0.097980966 | 0.003434577 | 0.005348592 |             |             |          |
|                 | 0.005689966 | 0.00335201  | 0.004513497 | 0.001373845 | 0           | 0.003250649 | 0.118930885 |             |             |          |
|                 | 0.031351469 | 0           | 8.82E-19    | 0           | 0.008474809 | 0.00034541  | 2.67E-19    | 0.000846629 |             |          |
|                 | 1.61E-18    | 0           | 0.019909669 | 0.014854361 | 0.004534053 | 0           | 0.01533416  | 0           | 0           |          |
|                 | 0.027715545 | 0.045442358 | 9.91E-19    | 0.25152638  | 7.19E-18    | 0.157996573 | 0.216663526 |             |             |          |
|                 | 0           | 0.009712059 | 0.002058568 | 0.011770627 |             |             |             |             |             |          |
| TCGA-VQ-A8P3-01 | 0.099992635 | 0.002949765 | 0.041516223 | 8.3E-19     | 0.047700002 |             |             |             |             |          |
|                 | 2.97E-22    | 5.52E-19    | 0           | 0           | 0           | 0.017787994 | 0.021127783 | 0.035591277 | 0.016690815 |          |
|                 | 0.013908678 | 0.034927738 | 0.010950092 | 0.010933027 | 2.43E-18    | 1.14E-18    | 0.054891443 |             |             |          |
|                 | 0           | 0.635501534 | 3.02E-19    | 0.049905532 | 2.85E-18    | 0.003140797 | 0.165887059 | 0           |             |          |
|                 | 0.125484071 | 0.041505604 | 0.000476878 | 0.011631697 | 0.000519835 | 0.012285357 |             |             |             |          |

|                 |             |             |             |             |             |             |             |
|-----------------|-------------|-------------|-------------|-------------|-------------|-------------|-------------|
| 0.006755034     | 0           | 0           | 0.079672035 | 0.033144016 | 8.74E-18    | 0           | 0.025545544 |
| 0.033294702     | 0           | 0           | 0.0015627   | 0           | 5.77E-19    | 0.026760808 | 0.016592181 |
| 0.061067449     | 0.012441456 | 0           | 2.17E-17    | 0.007840704 | 0.056328951 | 0.00010579  |             |
| 0.37161231      | 1.1E-17     | 0.135493538 | 0.139659889 | 0           | 0.022593345 | 0.05387337  |             |
| 0.076466715     |             |             |             |             |             |             |             |
| TCGA-VQ-A8P5-01 | 0.180454508 | 0.002701309 | 0.04210475  | 0.019962936 | 0.097473042 | 0           |             |
|                 | 6.71E-18    | 1.47E-18    | 0           | 0           | 0.004363942 | 0           | 9.69E-19    |
|                 | 0.015976829 | 0.003448298 |             |             |             |             |             |
|                 | 0.004864245 | 0.010025894 | 0           | 0.00169899  | 0.00939651  | 0           | 0.555425443 |
|                 | 1.17E-18    | 0.032192202 | 5.17E-18    | 0.004006178 | 0.060397553 | 0.04241817  | 0.057425203 |
|                 | 0.005565733 | 0.031466868 | 0.024541936 | 0.009089616 | 0.004294185 | 0.000989584 |             |
|                 | 0.0064228   | 0.012431332 | 0.118472798 | 0.015823743 | 2.74E-19    | 0           | 0.122883098 |
|                 | 0.00768389  | 0.001028069 | 0.002257376 | 0.000684431 | 0           | 0           | 0.050676881 |
|                 | 0.003827562 | 0.040624024 | 0.090327927 | 0.002722509 | 0           | 1.02E-17    | 0.001976203 |
|                 | 0.036906992 | 6.93E-20    | 0.299323356 | 0           | 0.193276276 | 0.157773909 | 4.93E-18    |
|                 | 0.038281986 | 0.02214501  | 0.060426996 |             |             |             |             |
| TCGA-VQ-A8P8-01 | 0.156054168 | 2.52E-19    | 0.000630448 | 0.343300331 | 0           | 0.004784614 |             |
|                 | 1.67E-22    | 0           | 0           | 0.005176695 | 0           | 0.012934503 | 0           |
|                 | 0.032319301 | 0.033508549 |             |             |             |             |             |
|                 | 0.083701425 | 0.005237807 | 0.000100252 | 0.002583615 | 0.06242994  | 0           | 0.635583027 |
|                 | 0           | 0           | 0.01184696  | 0.003538206 | 0.136671871 | 5.32E-18    | 0.082966758 |
|                 | 0.037461937 |             |             |             |             |             |             |
|                 | 9.95E-19    | 0.003899404 | 0.010112557 | 0.01072421  | 0.020573771 | 0           | 0.151155086 |
|                 | 0.054465545 | 0.021307766 | 3.23E-18    | 0           | 0           | 0.030161312 | 0.000243602 |
|                 | 0.035353603 |             |             |             |             |             |             |
|                 | 0.001425534 | 0           | 1.72E-17    | 0.018622107 | 1.14E-17    | 0.013102443 | 0.016586183 |
|                 | 0.040560548 | 0.000101335 | 0.006071598 | 0.014929196 | 0.055585129 | 0           | 0.430559807 |
|                 | 0           | 0.032642427 | 0.092340776 | 0           | 0.23773877  | 0.03121497  | 0.26895374  |
| TCGA-VQ-A8PB-01 | 0.080654241 | 0           | 0.01867663  | 0.032036361 | 0.023976688 | 0.024837437 |             |
|                 | 5.25E-19    | 0.008885792 | 0           | 0           | 0.017192691 | 0.017079724 | 0.037799795 |
|                 | 0.006686369 |             |             |             |             |             |             |
|                 | 0.015969216 | 0           | 0.022627721 | 0.016313069 | 3.81E-19    | 0           | 0.016070513 |
|                 | 2.63E-19    |             |             |             |             |             |             |
|                 | 0.599438663 | 1.35E-20    | 0           | 2.89E-18    | 4.29E-21    | 0.019178982 | 0.038895754 |
|                 | 0.104472451 |             |             |             |             |             |             |
|                 | 0.006872186 | 0.0121118   | 0.010274127 | 0.004839092 | 0.012198632 | 0.001478981 | 0           |
|                 | 0.00617707  | 0.073207305 | 0.013420661 | 0.008375307 | 1.62E-19    | 4E-19       | 0.003554548 |
|                 | 0.001415315 | 0.003633754 | 0.000466907 | 0.001330963 | 0.004443805 | 0.004518047 |             |
|                 | 6.5E-19     | 0.020422967 | 0.008596366 | 0.012639613 | 0.000871036 | 3.91E-18    | 0.012018257 |
|                 | 0.059873994 | 0           | 0.399220692 | 0           | 0.14652267  | 0.25704825  | 0           |
|                 | 0.064308257 |             |             |             |             |             |             |
|                 | 0.008035257 | 0.072343513 |             |             |             |             |             |
| TCGA-VQ-A8PC-01 | 0.266049764 | 3.64E-19    | 1.76E-18    | 0.183805698 | 0.031288506 | 0.001428231 |             |
|                 | 0.000609116 | 2.11E-18    | 0           | 2.35E-18    | 0.000492831 | 0.001829631 | 0.011296503 |
|                 | 0           |             |             |             |             |             |             |
|                 | 0.079943286 | 1.03E-18    | 0.052748903 | 0.000807386 | 0.001299234 | 0.014370114 |             |
|                 | 0.022253786 | 0.011944015 | 0.648103943 | 0           | 1.43E-18    | 0.028309097 | 0.004533356 |
|                 | 0.097589991 | 6.18E-20    | 0.060491154 | 0.013822413 | 0.0399793   | 0.047950436 |             |
|                 | 0.024441318 | 0.018365298 | 0.005580365 | 0           | 0.046801151 | 0.018994028 | 0.035426061 |
|                 | 0.024865461 | 0           | 0           | 0.009009526 | 3.34E-19    | 0.02032748  | 0.000920065 |
|                 | 0.004036795 |             |             |             |             |             |             |
|                 | 0           | 0.015079277 | 1.19E-18    | 0.00637909  | 0.035191163 | 0.051584152 | 6.23E-19    |
|                 | 2.13E-18    | 4.26E-19    | 0.038617952 | 2.64E-18    | 0.378215425 | 1.21E-19    | 0.038508796 |
|                 | 0.051008736 | 0           | 0.199464208 | 0.011126893 | 0.2105911   |             |             |

TCGA-VQ-A8PD-01 0.375651461 0 0.047078372 0.416204906 0 0.018996102  
0.131203738 0.021351037 0.002212164 5.78E-18 0.001629927 0.076940241  
0.110518037 0.01810278 0.109918076 0.034829062 0.133964372 0.001122554  
8.47E-19 0.013125822 0.099563121 0.006791915 0.612251607 0 0.001694246  
0.019132009 0.000850324 0.204845482 1.51E-18 0.061129326 0.059980041  
0.010076431 0.022730605 0.017693093 0.013644516 0.018217499 0 0.138212671  
0.004957929 0.023881411 0.009807518 0 0 0.046583971 1.02E-18 0.039095842  
0.000327532 0.001507096 0 0.007455043 0 0.024048372 0.038765614  
0.021162809 0 0 0.004324677 0.042075732 0 0.267116238 0 0.02514757  
0.058226299 2.15E-18 0.379632989 0.050628683 0.430261673

TCGA-VQ-A8PE-01 0.233730488 4.26E-20 1.73E-18 0.165911864 0.082903337 0.006129788  
2.41E-20 0 1.22E-19 8.51E-18 0.010128684 0.007774245 0.017812843 7.51E-19  
0.026492229 1.82E-18 0.035749956 0.005026414 3.84E-19 0.01088564 0.000925472  
9.31E-20 0.541107762 0 0 1.02E-17 0.014458292 0.020992786 0.056486351  
0.040889454 0.001194574 0.00883573 0.018893575 0.008091629 0.008336988 0  
5.15E-22 0.045755561 0.064484592 0.048807731 0 3.72E-18 0.018549196  
0.00092616 0 0.028305736 0.001012103 0 6.37E-18 0.043093645 0.000822323  
0.048222285 0.065941074 0.04086553 2.19E-18 0 0.026677811 0.030543462 0  
0.273976311 1.44E-17 0.123759994 0.15850052 9.65E-19 0.134496311 0.000462736  
0.134959048

TCGA-VQ-A8PF-01 0.408620473 0 0.028219845 0.184805894 0.088412538 0.010697625  
0.098587394 0 6.56E-19 1.71E-18 0.007142283 0.140645538 0.150250997  
0.040348959 0.207882692 0.010282807 0.090069971 0.002349988 7.85E-19  
0.051272329 0.10109394 0.006064309 0.450338645 1.84E-20 0.008014817  
0.012846551 0.002466305 0.125049091 0.205479643 0.024472062 0.059241535  
0.083993036 0.076634002 0.040019388 0.012006886 0.011720784 0.003127908  
0.023504079 0.06490867 0.009154991 0.027419863 9.65E-19 0 0.056530436  
1.66E-18 0 0 1.15E-22 0 0.077565338 3.45E-18 0.10254769 0.109611774  
0.047956076 5.11E-21 6.7E-18 0 0.014348553 1.4E-18 0.199790278 0  
0.135544662 0.149421775 0.000820676 0.337471903 0.054554378 0.392026281

TCGA-VQ-A8PH-01 0.085001204 8.57E-20 4.17E-19 0.095332784 0.021948114 0.001822194  
0 0 2.72E-18 6.15E-18 0.03721628 0.055413664 0.023946112 0 0.004976739  
0 0.015005324 0.014505379 0 0 0 0 0.452613855 3.61E-20 1.77E-17 0  
0.009135728 0.062251077 2.89E-18 0.028922141 0 0 0.005074377 0.009485916  
0.008136975 2.71E-20 0 0.039449946 0.129416859 0.048772756 0 0  
3.68E-18 0 6.97E-21 0.004612202 0.001824385 1.91E-20 1.56E-17 0.097447052  
0.019181229 0.065815615 0.001391144 0.027063936 0 1.74E-17 0.008186097  
0.028599343 3.65E-18 0.273238193 0 0.131666307 0.268259456 7.18E-18  
0.105922282 8.91E-18 0.105922282

TCGA-VQ-A8PJ-01 0.025825404 1.36E-18 3.97E-18 0 0.02892018 0 0 1.58E-18  
0.015234083 0.002842402 0.01309295 0.012795262 0.00422126 0 0.007458275  
0 0.003991247 0.008224097 0 3.99E-21 0.024139481 0.0046304 0.693833047  
1.08E-19 1.09E-18 4.82E-18 0.009549148 0.027421309 0.0183851 0.083462089  
0.015079916 0.000380825 0.002008368 0.006059807 0.007189594 0.005818639

9.88E-19 0.004301554 0.064295777 0.012858532 0 7.64E-19 9.22E-18 0.014090255  
 0 0.003099766 0.000614424 0 2.19E-18 0.035168277 4.43E-18 0.001341914  
 0.064413608 0.015711768 1.63E-18 0 0.00150824 0.056965027 0 0.224781008  
 0 0.074697116 0.050260921 1.18E-17 0.016664053 0.012069741 0.028733794  
 TCGA-VQ-A8PK-01 0.094162776 0.003190689 0.024528123 0.001261994 0.027038275  
 0.00136274 0 0 2.23E-18 0 0.006682848 0 0.007416927 0.000959459  
 0.016014966 0.000447583 0.019307709 0.004362222 0 0 0 0.010477629  
 0.613615491 0 9.67E-18 0 0.001362488 0.013259657 0.071539872 0.061144757  
 0 0.012553983 0.005468456 0.0253912 0 7.19E-21 0.006049393 1.56E-19  
 0.026299824 0.02215767 0 0 8.68E-18 0 1.01E-19 0 0.001090643  
 1.08E-19 0 0.030731142 4.87E-18 0.026718991 0.072912435 0.025345574 3.3E-21  
 0 0.004719594 0.083032594 0 0.280327111 5.86E-18 0.096179776 0.122895819  
 1.07E-18 0.016195737 0.001595344 0.017791081  
 TCGA-VQ-A8PM-01 0.214371963 6.36E-19 0.003806186 0.241375521 7.38E-18 0.009600458  
 0.026453488 0.0043337 0.00713797 5.03E-18 0.012907516 0.042954995  
 0.04813929 0 0.054312867 0.009491779 0.091293719 0.001257571 0  
 0.00537092 0.069113363 8.2E-20 0.528646922 0 0 0.022024726 0.016790897  
 0.165455103 3.57E-18 0.030394315 0.032395994 0.008886415 0.018100956  
 0.032787358 0.008259733 0.00547657 0 0.082125802 0.040595541 0.021477835  
 0 0 0 0.026118367 0.005947368 0.006516821 0.001088283 3.74E-21  
 9.29E-19 0.015147257 2.83E-19 0.008966316 0.002668578 0.063379391 0 0  
 2.97E-19 0.041567148 1.74E-18 0.356840803 2.84E-18 0.044673864 0.09799982 0  
 0.207454189 0.034556682 0.242010871  
 TCGA-VQ-A8PO-01 0.239303033 0.001611797 0.038068154 0.233018411 0.098133024  
 0.02069375 0.010716939 1.53E-19 0 0 0.012874196 0.045452382 0.094980825  
 0.01747214 0.021349631 0.002650397 0.089141497 0 9.42E-19 0.01052526  
 0.000596648 0 0.580738435 0 0 6.42E-19 0.002150986 0.005726128  
 0.045530598 0.090754262 0.004116976 0.041050533 0.037895173 0.019891119  
 0.007765758 2.23E-20 0.000500991 0.096175634 0.07727321 0.003592322  
 2.82E-18 0 0.087264059 0.005001402 0 0.014491792 0.00000944 0 0  
 0.04370241 0 0.044282222 0.071964721 0.031652567 0 0 0.027149383  
 0.059722152 3.96E-19 0.123884502 8.39E-18 0.193861179 0.185138453 0  
 0.22520823 0.001104223 0.226312452  
 TCGA-VQ-A8PP-01 0.243195369 0.00029019 0.010371821 0.087112454 0.039536468  
 0.013121689 0.016064897 0.006771932 0.006475875 2.3E-18 0.005855776  
 0.023909078 0.037125375 0.004296171 0.027444856 0.003047553 0.0789619  
 0.000658478 0 0.005220394 0 0.00225416 0.663711999 0 0.057353037  
 6.64E-19 1.46E-21 0.031079378 0 0.157843755 4.4E-20 0.017533835 0.009361104  
 0.011505618 0.019027895 9.99E-19 0.001568986 0.003107183 0.021063529  
 0.007727591 0.002967075 0 0.029792465 0 0 0.017915828 0.000071  
 9.42E-20 0 0.020387119 3.72E-18 0.030892326 0.048717058 0.013338984  
 0.014930245 6.51E-18 0.005506479 0.070702025 0 0.416983382 1.78E-18  
 0.045625832 0.176589572 0 0.109864548 0.028821613 0.138686162  
 TCGA-VQ-A8PQ-01 0.423419239 0 0 0.918238127 0 0.107208464 0.400888189

|                 |             |             |             |             |             |             |             |             |             |
|-----------------|-------------|-------------|-------------|-------------|-------------|-------------|-------------|-------------|-------------|
| 0.122696771     | 0.047125765 | 8.93E-18    | 0.005340706 | 0.188598329 | 0.169023841 |             |             |             |             |
| 0.013047801     | 0.204027854 | 0.061818879 | 0.235837194 | 0           | 0.000362676 | 0.024555749 |             |             |             |
| 0.044860461     | 0.015099646 | 0.390981923 | 1.18E-19    | 0.141615124 | 0.003113606 |             |             |             |             |
| 0.002949307     | 0.143252519 | 0.149595137 | 0.026116057 | 0.029072971 | 0.019226553 |             |             |             |             |
| 0.014381558     | 0.020853784 | 0.021448635 | 0.018621593 | 8.17E-19    | 0.342135969 | 0           |             |             |             |
| 0.016359214     | 0.004632385 | 1.36E-18    | 0           | 0.02555847  | 4.95E-19    | 0.172030579 |             |             |             |
| 0.003471861     | 0           | 2.25E-18    | 0.057362335 | 2.57E-17    | 0.063193491 | 0.074835151 | 0           |             |             |
| 1.03E-18        | 2.89E-18    | 0.036403556 | 0.00847073  | 4.47E-18    | 0.203819632 | 1.1E-17     | 0           | 0           |             |
| 0               | 0.876330797 | 0.093237793 | 0.96956859  |             |             |             |             |             |             |
| TCGA-VQ-A8PU-01 | 0.039162821 | 0           | 1.36E-17    | 0           | 0.005892181 | 4.99E-19    | 0           | 0           |             |
| 0.030749453     | 0.006257032 | 0.004666201 | 0.001846001 | 0           | 2.48E-18    | 0.006752002 | 0           |             |             |
| 0.008254605     | 0.002512573 | 8.43E-19    | 2.88E-19    | 0.006178459 | 0.009904488 | 0.634569339 |             |             |             |
| 2.35E-19        | 0           | 1.53E-17    | 0           | 0.057331603 | 0           | 0.067253098 | 0.011984261 | 2.21E-20    |             |
| 1.67E-18        | 0.009349606 | 0.004427979 | 0.00341107  | 4.03E-18    | 1.82E-18    | 0.036257281 |             |             |             |
| 0.003621057     | 0           | 0           | 1.77E-17    | 0.00189632  | 0.000908237 | 9.31E-19    | 0.000573829 |             |             |
| 0.006721119     | 0           | 0.041037753 | 0           | 0.000443135 | 0.041210086 | 0.006049627 |             |             |             |
| 5.08E-19        | 0           | 0           | 0.039880091 | 6.42E-18    | 0.288962139 | 0           | 0.04305229  | 0.074697204 |             |
| 1.86E-18        | 0.015266392 | 0.00308923  | 0.018355621 |             |             |             |             |             |             |
| TCGA-VQ-A8PX-01 | 0.105784255 | 0           | 0           | 0.079236925 | 0.020310228 | 0.007880346 |             |             |             |
| 0.014730383     | 0.02235183  | 0.019957487 | 0           | 0.003273632 | 0.017861589 | 0.026031133 |             |             |             |
| 0.004954807     | 0.013639954 | 0           | 0.040108299 | 0.001316983 | 5.29E-19    | 0.000807193 |             |             |             |
| 0.000724145     | 1.15E-19    | 0.613268608 | 1.92E-21    | 0           | 7E-19       | 0.004057656 | 0.014099549 |             |             |
| 0               | 0.047794198 | 0.006181168 | 0           | 0.00984508  | 0.01083755  | 0.018846598 |             |             |             |
| 0.005893781     | 1.36E-18    | 0.023623845 | 0.044620364 | 0.002706048 | 0.003069228 | 1.6E-18     |             |             |             |
| 1.15E-17        | 0.00045528  | 0           | 0.004637209 | 0.002099765 | 0.006140556 | 6.76E-18    | 0           |             |             |
| 0.04787713      | 0.011901293 | 0.051515506 | 0.031102929 | 0           | 0           | 0.00554931  |             |             |             |
| 0.030489165     | 0           | 0.188056679 | 2.35E-18    | 0.070222929 | 0.103933725 | 0.002996322 |             |             |             |
| 0.098875946     | 0.000362073 | 0.099238019 |             |             |             |             |             |             |             |
| TCGA-VQ-A91A-01 | 0.105305705 | 0.001910141 | 0.127189647 | 1.98E-19    | 0.006507321 | 0           |             |             |             |
| 2.99E-19        | 0           | 3.16E-20    | 0.008468299 | 0           | 0           | 0           | 1.06E-17    | 0.106718144 | 0.094159379 |
| 0.006122595     | 0.0000584   | 0           | 0.014460043 | 0.125867315 | 0.000403175 | 0.576506169 |             |             |             |
| 9.92E-21        | 0.179022419 | 1.61E-19    | 0.000440625 | 0.16932053  | 0.356468972 | 0.066552219 |             |             |             |
| 0.060676843     | 0.028416366 | 0.028931541 | 0.008374586 | 0.005174603 | 0.006268275 |             |             |             |             |
| 0.002519765     | 6.43E-19    | 0.022357169 | 0.001480924 | 0.084884243 | 6.17E-19    | 0.151856301 |             |             |             |
| 0.062141033     | 9.83E-19    | 0           | 0.00011612  | 0.005542972 | 0           | 0.041305226 | 0           |             |             |
| 3.72E-19        | 0.199122041 | 0.005743485 | 0           | 8.76E-19    | 5.85E-18    | 0.074291504 | 0           |             |             |
| 0.236291963     | 0           | 0.078881653 | 0.058968563 | 0           | 0.092587601 | 0.153399937 |             |             |             |
| 0.245987538     |             |             |             |             |             |             |             |             |             |
| TCGA-VQ-A91D-01 | 0.166295174 | 3.89E-21    | 6.68E-19    | 0.023443051 | 0.087420216 | 0.012542752 |             |             |             |
| 5.69E-18        | 0           | 0.029815996 | 0.013469505 | 0.007649397 | 3.83E-21    | 0           | 0.00259375  |             |             |
| 0.017884363     | 0.01852789  | 0.025725365 | 3.78E-19    | 0           | 0.002924844 | 0           | 0           |             |             |
| 0.638305357     | 1.16E-18    | 2.02E-18    | 4.77E-19    | 0           | 0           | 0           | 0.098778272 | 0.001834351 |             |
| 0.028022541     | 0.025657404 | 0.010279462 | 0.007986919 | 4.46E-21    | 0.002244746 |             |             |             |             |
| 0.000236727     | 0.030947211 | 0.030197489 | 0.015670762 | 0           | 0.062483263 | 0.001241938 |             |             |             |

|                 |             |             |             |             |             |             |             |
|-----------------|-------------|-------------|-------------|-------------|-------------|-------------|-------------|
|                 | 0.000177144 | 0.00164551  | 0.000120897 | 0.000331662 | 9.52E-18    | 0.027997357 | 0           |
|                 | 0.032796764 | 0.038110147 | 0.010524677 | 5.12E-19    | 0           | 0.012299088 | 0.040208864 |
|                 | 0.309381953 | 1.36E-18    | 0.189436852 | 0.063911486 | 1.29E-18    | 0.052253186 | 1.01E-18    |
|                 | 0.052253186 |             |             |             |             |             |             |
| TCGA-VQ-A91E-01 | 0.134924731 | 2.09E-18    | 6.65E-18    | 0.183084124 | 0.006395387 | 0.018656708 |             |
|                 | 0.01300512  | 0.006147549 | 0.00736974  | 0           | 0.00855296  | 0.040854646 | 0.066273345 |
|                 | 0.007441415 | 0.012104868 | 0           | 0.069049467 | 0.004693957 | 0           | 0.001944265 |
|                 | 0.015654979 | 0.623726525 | 0           | 9.23E-18    | 0           | 0           | 0.000657584 |
|                 | 0.001594022 | 0.003686104 | 0.010040724 | 0.015680326 | 0.008658254 | 0.003598107 | 0           |
|                 | 0.046573142 | 0.054031214 | 0.000130953 | 0.013213653 | 0           | 1.5E-17     | 0           |
|                 | 0.014687744 | 0.000102858 | 0.003231094 | 0.004693046 | 0.011687644 | 2.83E-20    |             |
|                 | 0.028041359 | 0.013894974 | 0.053227177 | 0.002131428 | 3.23E-18    | 0.020462443 |             |
|                 | 0.026390616 | 3.03E-18    | 0.249180362 | 5.6E-18     | 0.094407439 | 0.197892113 | 0           |
|                 | 0.187445143 | 5.66E-18    | 0.187445143 |             |             |             |             |
| TCGA-VQ-A91K-01 | 0.208958718 | 0           | 0.028574194 | 0.033935634 | 0.018675945 | 0.001072551 |             |
|                 | 6.81E-19    | 0.000262024 | 0.030504604 | 0.027836247 | 0.009347688 | 0.006227436 |             |
|                 | 0.029218953 | 4.9E-19     | 0.029645592 | 0.018214302 | 0.044204431 | 0.001383848 | 0           |
|                 | 0.015765078 | 1.99E-18    | 0.017500473 | 0.683090343 | 1.13E-19    | 0.047123074 | 1.73E-19    |
|                 | 0.001511258 | 0.029032498 | 0.074786401 | 0.080585142 | 0.003099146 | 0.051174698 |             |
|                 | 0.051968194 | 0.037803993 | 0.003167418 | 0           | 0.004094438 | 0.015711605 | 0.033037886 |
|                 | 0.049718786 | 0.012873515 | 0           | 0           | 0           | 9.49E-20    | 0           |
|                 | 0           | 0.029000105 | 0.157540708 | 0.003862698 | 0.012106852 | 4.62E-18    | 1.07E-18    |
|                 | 0.033338917 | 0           | 0.260539468 | 0           | 0.063071999 | 0.065601392 | 0.008079379 |
|                 | 0.093937517 | 0.023561537 | 0.117499054 |             |             |             |             |
| TCGA-VQ-A91N-01 | 0.055440751 | 0           | 0           | 0.024628534 | 0.038195586 | 0.006484314 |             |
|                 | 8.33E-19    | 0.001446967 | 2.18E-19    | 0           | 0.01197721  | 0           | 0.010832859 |
|                 | 8.35E-18    | 0.019699842 | 0.032377658 | 1.07E-17    | 0           | 0           | 0.00167005  |
|                 | 3.02E-19    | 0           | 0           | 0.00284194  | 0.009502033 | 0           | 0.089785046 |
|                 | 0.00080708  | 0.005084761 | 0.002453972 | 0.009364441 | 0.0064138   | 1.43E-18    |             |
|                 | 0.010661449 | 0.045974101 | 0.026124862 | 0           | 5.22E-18    | 1.33E-17    | 7.23E-19    |
|                 | 0.003873873 | 0.002352989 | 0.001701049 | 0           | 0           | 0.020379158 | 0.006229839 |
|                 | 0.030697655 | 0.012255088 | 0           | 0.02293304  | 0.00706334  | 0.053533591 | 0           |
|                 | 0.211422833 | 9.61E-19    | 0.108688879 | 0.11689864  | 6.54E-18    | 0.02641208  | 0           |
|                 | 0.02641208  |             |             |             |             |             |             |
| TCGA-VQ-A91Q-01 | 0.028944474 | 0           | 0.02610039  | 0.002943499 | 0.006691504 | 0.001045658 |             |
|                 | 0           | 4.48E-19    | 0.037599168 | 0           | 0.000693699 | 0.000598179 | 8.16E-19    |
|                 | 0.025748956 | 0.000389796 | 0.004427387 | 0.008379898 | 2.76E-19    | 0.064684549 |             |
|                 | 0.008293111 | 0.59906309  | 0           | 0.131246439 | 0.005378249 | 0.002933249 | 0.073014775 |
|                 | 0.004798682 | 0.067966027 | 0.043377107 | 3.57E-20    | 0.002055665 | 0.001142006 |             |
|                 | 0.016940537 | 0.011432987 | 0           | 0           | 0.00716815  | 0.060544498 | 7.39E-19    |
|                 | 0.030831189 | 0           | 7.92E-20    | 0.007093494 | 0.000593327 | 3.71E-18    | 7.72E-20    |
|                 | 0.109892956 | 0.00955361  | 0.002679357 | 8.59E-19    | 1.07E-18    | 0.042293027 | 0           |
|                 | 0.244226957 | 6.72E-19    | 0.013679034 | 0.025334612 | 0           | 0.019579102 | 0.097965494 |
|                 | 0.117544596 |             |             |             |             |             |             |

TCGA-VQ-A91S-01 0.144311013 0 1E-17 0.013450629 0.0814282 0.00072239 0  
1.26E-20 1.02E-18 2.6E-18 0.016088993 0.042641771 0.045302183 0 0.03699189  
1.24E-19 4E-20 0.019117697 0 0.001103938 0.01459586 0.009111284  
0.569503156 0 2.55E-18 0 0.005520061 0.119427495 0.014479544 0.05970106  
0.008510775 0.016616171 0.032680635 0.005734102 0.003008804 0.001065637  
3.49E-18 4.13E-18 0.039860204 0.015648426 0 0 5.98E-18 0.010200251 0  
0.007391681 0.000477039 0.00366476 1.78E-17 0.055162375 0 0.031487392  
0.089813598 0.012580122 0 0 0 0.014347873 0 0.174593424 4.63E-18  
0.073794956 0.169278652 1.63E-18 0.059731572 0.00729793 0.067029502  
TCGA-VQ-A91U-01 0.170021644 5.66E-19 0 0.111021048 0.048364823 0.026740521  
2.67E-19 0 0.003684412 0 0.021668096 0.05720302 0.056879583 0.002758246  
0.018759686 0 0.030025073 0.003217248 1.78E-18 0.009363419 0.022423171 0  
0.506116714 2.88E-19 2.98E-18 3.86E-19 0.000248225 0.058953622 0.03842837  
0.05488559 0.016587485 0.017743702 0.016030043 0.003985557 0.00993261  
0.001391309 2.68E-18 0.028843299 0.054643905 0.026329202 3.74E-19 1.87E-19  
9.69E-18 0.012842267 0 0.006383901 0.002385176 0.00047492 0 0.04044637  
0 0.049344185 0 0.040492993 1.99E-20 0 3.56E-20 0.037479314 3.53E-18  
0.312592568 0 0.072192931 0.171725947 0.001849514 0.137159145 0.011211586  
0.14837073  
TCGA-VQ-A91V-01 0.031863003 0 2.1E-17 0.00423088 0.0106971 0.001911386  
7.56E-19 0.003276021 0.007178073 9.53E-19 0.007957 0.001740649 0.004019601 0  
0.006651712 0 0.010152445 0.006315459 0 0 0 0.003459462 0.699169819  
0 0 0 0.001441355 0.027830165 0.004265501 0.127145404 0.005035201  
0.002321784 0.001094158 0.00993281 0.012647631 0.002623063 2.25E-18  
0.000530352 0.015633403 0.011694678 0.001136256 2.82E-18 1.41E-17 0.000114325  
0.003161787 0.001548508 0.000974314 0.005193192 0 0.004311403 1.02E-19  
0.002616818 0 0.02287305 0.003752453 3.47E-19 0.002271782 0.043693735 0  
0.281310245 0 0.061271895 0.048007973 4.34E-18 0.022670584 0 0.022670584  
TCGA-VQ-A91W-01 0.168977838 0 0 0.065471622 0.015555755 0.022101965  
0.033942697 0.022486263 0.035730229 0.016225781 0.0032166 0.009837983  
0.030244131 3.9E-19 0.123782359 1.29E-18 0.034934455 0.012132005 3.42E-19  
0.008112198 0.017925335 0.004418308 0.450451191 8.12E-21 1.23E-18 2.71E-18 0  
0.045801428 2.37E-18 0.035330982 0.009689587 0.039509891 0.036305715  
0.022325652 0.013940605 0.002357523 8.86E-19 0.009822276 0.07405455 0  
0.023045695 0 2.94E-18 0.013270191 0 0.005227811 0.000461881 0.001594515  
2E-18 0.070006436 0.011996671 0.006748598 0.097664679 0.004933327 0  
3.02E-18 0 0.021189034 2.8E-18 0.201232245 9.4E-18 0.124122982 0.13863568  
0 0.125611386 0.008962667 0.134574054  
TCGA-VQ-A91X-01 4.8E-18 1.74E-18 1.16E-18 0.034085121 0 0.004137266 3.19E-19  
2.21E-18 0.021271509 0 0.003097877 0.003472675 0 1.79E-17 0.026074507 0  
0.019374431 0.01422273 0 1.41E-19 2.82E-18 0.002991268 0.571032574  
3.87E-19 0 4.03E-18 0 0.013241671 0.086466728 0.054531408 4.88E-19 0  
0.000697137 0.0000782 0.002235742 0 1.19E-18 0.017136823 0.082712686 0  
0 0 0 1.05E-17 0.001799068 0.009810874 0.000581411 0 1.09E-17

|                 |             |             |             |             |             |             |             |             |
|-----------------|-------------|-------------|-------------|-------------|-------------|-------------|-------------|-------------|
|                 | 0.210281585 | 2.3E-19     | 0.00502982  | 0.013876966 | 0.016846043 | 8.6E-19     | 0           | 0           |
|                 | 0.033686703 | 0           | 0.195990386 | 0           | 0.097069684 | 0.179224937 | 0           | 0.028523204 |
|                 | 2.28E-18    | 0.028523204 |             |             |             |             |             |             |
| TCGA-VQ-A91Y-01 | 0.336877826 | 0.01177882  | 0.087410335 | 0.103660846 | 1.73E-18    |             |             |             |
|                 | 0.007513249 | 0.053887609 | 0.014315232 | 0.003367736 | 0           | 0.01013385  | 0.057314618 |             |
|                 | 0.045710809 | 3E-19       | 0.037531958 | 0.065770594 | 0.067578229 | 0.00558407  | 0           |             |
|                 | 0.017365407 | 0.025998445 | 0.010275507 | 0.484347506 | 0           | 0.23945906  | 0.024068678 |             |
|                 | 0           | 0.149782549 | 0.072947835 | 0.047818668 | 0.017016251 | 0.042331466 | 0.040697162 |             |
|                 | 0.01738639  | 0.000916374 | 0.007364248 | 0.001273059 | 0.024105242 | 0           | 0.020782916 |             |
|                 | 0.008399527 | 0           | 0           | 0.009743135 | 1.94E-18    | 0.005838349 | 0.004594256 | 1.01E-20    |
|                 | 1.2E-18     | 0.017382719 | 0           | 0.013690581 | 0.151392655 | 0.012876995 | 0.005141169 | 0           |
|                 | 9.55E-18    | 0.034202481 | 0           | 0.436775198 | 7.13E-18    | 0.030077397 | 0.06895889  | 9.8E-19     |
|                 | 0.169719317 | 0.138618163 | 0.30833748  |             |             |             |             |             |
| TCGA-VQ-A91Z-01 | 0           | 1.38E-18    | 0           | 0           | 0.125723569 | 1.1E-19     | 0           | 5.06E-19    |
|                 | 0.005704746 | 0.003102994 | 0           | 2.18E-17    | 0.010146685 | 0.000544401 | 0.00637393  |             |
|                 | 1.73E-18    | 0           | 0           | 0           | 0.000456052 | 0.548845528 | 1.28E-18    | 1.11E-18    |
|                 | 0.000204008 | 1.62E-19    | 0.04262793  | 0.07727394  | 0           | 1.18E-18    | 0           | 0.00033686  |
|                 | 0.00958351  | 0           | 8.2E-19     | 2.51E-18    | 0.061773568 | 0.023781957 | 0           | 0           |
|                 | 3.96E-18    | 0.000132355 | 0.00048079  | 0.003664179 | 0           | 1.63E-17    | 0.019374529 |             |
|                 | 0.041868775 | 7.73E-21    | 0.052915078 | 0.011676523 | 4.94E-18    | 0           | 0.007100029 |             |
|                 | 0.063170867 | 0           | 0.267948444 | 0           | 0.092163319 | 0.132607314 | 0           | 0.008761704 |
|                 | 1.24E-18    | 0.008761704 |             |             |             |             |             |             |
| TCGA-VQ-A922-01 | 0.070687517 | 0.003292638 | 0.228539908 | 1.26E-19    | 1.01E-21    | 0           |             |             |
|                 | 0.006284598 | 0           | 0.004362108 | 1.33E-17    | 0           | 0.007788168 | 1.56E-18    | 0           |
|                 | 0.026303218 | 0.011555774 | 0.002860022 | 0           | 0.004610486 | 0.11351408  | 0.010206444 |             |
|                 | 0.512145224 | 0           | 0.063341325 | 1.33E-19    | 0.001165627 | 0.217470808 | 0.129177641 |             |
|                 | 0.0430314   | 0.051270518 | 0           | 0.003184435 | 3.46E-19    | 0.009453095 | 0.000926139 |             |
|                 | 0.003553848 | 1.4E-17     | 0.043821329 | 0.047126998 | 4.38E-18    | 2.74E-19    | 4.04E-18    |             |
|                 | 0.057346789 | 2.26E-18    | 2.02E-18    | 0.012927013 | 0           | 0           | 0.027254812 | 0           |
|                 | 0.211316182 | 0           | 6.64E-18    | 9.33E-18    | 0           | 0.027374199 | 5.18E-19    | 0.188264754 |
|                 | 0.100688959 | 0.057343449 | 0           | 0.021372129 | 0.090074021 | 0.111446151 |             |             |
| TCGA-VQ-A923-01 | 0.394667652 | 1.01E-20    | 0.014379344 | 0.223677172 | 0.035666676 |             |             |             |
|                 | 0.008353729 | 0.103349434 | 0.000146173 | 0.006671043 | 0           | 0.020468574 | 0.174433328 |             |
|                 | 0.148659006 | 0.070777989 | 0.061879711 | 0           | 0.091660319 | 0           | 0           | 0.016615268 |
|                 | 0.050937145 | 0.00400939  | 0.48604139  | 0           | 0           | 0.014019702 | 0.001386418 |             |
|                 | 0.138891958 | 1.84E-18    | 0.031412363 | 0.025551129 | 0.01599191  | 0.020208715 |             |             |
|                 | 0.010998943 | 0.013534513 | 0.018940024 | 0           | 0.053298142 | 0.030384838 | 0.006965451 |             |
|                 | 0.006189972 | 0           | 2.94E-18    | 0.029128331 | 9.09E-19    | 0.018763515 | 0.000698368 | 0           |
|                 | 1.26E-18    | 0.05320592  | 0           | 0.055916384 | 0.087722805 | 0.020739704 | 0.004860535 |             |
|                 | 3.61E-17    | 0           | 0.014256816 | 0           | 0.207088089 | 0           | 0.117450576 | 0.127063656 |
|                 | 2.43E-18    | 0.30306515  | 0.025468573 | 0.328533723 |             |             |             |             |
| TCGA-VQ-A924-01 | 0.198681638 | 0.004194395 | 0.03787385  | 0.035664315 | 0.097596267 |             |             |             |
|                 | 0.014997497 | 0           | 5.43E-20    | 0           | 1.53E-18    | 0.010885665 | 0.011915625 | 0.042895462 |
|                 | 0.010559575 | 0.044914471 | 0           | 0.028792156 | 0.01259752  | 2.34E-18    | 0.019072888 | 0           |

|                 |             |             |             |             |             |             |             |
|-----------------|-------------|-------------|-------------|-------------|-------------|-------------|-------------|
| 9.52E-19        | 0.63185731  | 9.34E-19    | 0.015899118 | 0           | 0           | 0.01043818  | 0.168860768 |
| 0.084881126     | 0.002541349 | 0.035809133 | 0.035230719 | 0.019854012 | 0.004954825 |             |             |
| 0.000107285     | 0.005080826 | 0.012279405 | 0.062509793 | 0.02781702  | 0           | 9E-19       |             |
| 0.024036546     | 0           | 0.000505908 | 0           | 0.000726315 | 5.31E-19    | 0           | 0.028528298 |
| 2.98E-18        | 0.053529121 | 0.069158904 | 0.009316374 | 0           | 1.86E-19    | 0.019767434 |             |
| 0.047958867     | 2.21E-19    | 0.307705519 | 4.59E-20    | 0.133284722 | 0.275807559 | 0           |             |
| 0.071611191     | 0.010046757 | 0.081657947 |             |             |             |             |             |
| TCGA-VQ-A925-01 | 0.043008448 | 3.66E-19    | 6.65E-18    | 0.011660917 | 0.022535541 | 0.001562957 |             |
| 6.37E-20        | 0           | 2.75E-20    | 0           | 0.007155068 | 0           | 0.002879833 | 1.36E-18    |
| 0.000978875     | 0.009639543 | 0           | 0           | 0.003718362 | 0.002821765 | 0.654690421 | 0           |
| 1E-19           | 0           | 0           | 0.077524933 | 0.019504985 | 0.093140222 | 0.006832073 | 0           |
| 0.001591048     | 0.007257805 | 0.003361353 | 0.00403172  | 2.37E-18    | 0.003921817 |             |             |
| 0.039589942     | 0.018242837 | 6.27E-18    | 0           | 3.97E-18    | 0           | 0.005328776 | 0.007212176 |
| 0.00256484      | 0.002873313 | 0           | 0.005363154 | 1.74E-17    | 0.001478893 | 1.09E-19    |             |
| 0.014539231     | 0.00298231  | 0           | 0           | 0.051493866 | 0           | 0.326563219 | 0           |
| 0.180407999     | 0           | 0.013811565 | 0.001859181 | 0.015670746 |             |             |             |
| TCGA-VQ-A927-01 | 0.036787118 | 2.78E-18    | 0.000788119 | 0.03009117  | 4.99E-18    | 0           |             |
| 0.000167852     | 0           | 0.021433748 | 0.008073777 | 0.003487583 | 0.004945282 | 0.008607522 |             |
| 0               | 0.018129151 | 0           | 0.012130669 | 0.000927054 | 0.000312485 | 0.002696614 |             |
| 0.079146241     | 0.014345814 | 0.65439306  | 0           | 0           | 6.79E-19    | 0.009499534 | 0.159990275 |
| 0.057161251     | 0.084059535 | 0.062112956 | 0.002065791 | 0.002096376 | 0.011273367 |             |             |
| 0.004971815     | 0.025422032 | 0           | 0           | 0.004659153 | 0.009548329 | 6.8E-20     | 7.05E-19    |
| 4.08E-18        | 0.040058367 | 0           | 0           | 0.000698396 | 0           | 2.22E-18    | 0.003575928 |
| 0.00577455      | 0.018291234 | 0.045361343 | 0.008981728 | 0.031517565 | 0           | 0.050493386 |             |
| 0               | 0.336979699 | 0           | 0.019508871 | 0.026131126 | 0           | 0.03941099  | 0.03957312  |
| 0.078984111     |             |             |             |             |             |             |             |
| TCGA-VQ-A928-01 | 0.104165349 | 0           | 0.079734936 | 0.028144195 | 7.66E-19    | 0           | 0.002685328 |
| 8.14E-20        | 0.032443234 | 0.011582057 | 0.000237225 | 0.020795045 | 4.87E-19    | 0           |             |
| 0.018951627     | 0.009582804 | 0.012276307 | 0.004095944 | 0.008372037 | 0.000402031 |             |             |
| 0.050598532     | 0.004192145 | 0.402692039 | 0.000253372 | 0.049597664 | 0.000129478 |             |             |
| 0.000246079     | 0.056158609 | 0           | 0.044677898 | 0.026756659 | 0.000533428 | 0.006401755 |             |
| 0.002124176     | 0.011425216 | 0.003245574 | 0.001803237 | 0           | 0.044345207 | 0.00586489  |             |
| 0.009700848     | 1.11E-18    | 0.170055051 | 0.031301532 | 2.34E-18    | 0.00534304  | 0.006485032 |             |
| 0.000369552     | 0           | 0.030341623 | 0           | 5.34E-21    | 0.167528322 | 0.007252614 | 0           |
| 1.03E-19        | 0.000751951 | 0.03150357  | 0           | 0.266777522 | 0           | 0.050391985 | 0.067442476 |
| 2.91E-18        | 0.050374972 | 0.050098098 | 0.10047307  |             |             |             |             |
| TCGA-VQ-A92D-01 | 0.043057999 | 0           | 0.001563853 | 0.005767391 | 0.049688662 | 1.72E-20    | 0           |
| 0               | 0.012160417 | 0           | 2.71E-20    | 5.93E-20    | 0           | 0           | 0.002984166 |
| 0.00166461      | 0.008108522 | 0           | 7.07E-19    | 0.006296807 | 0.002149831 | 0.722884361 |             |
| 1.35E-18        | 4.25E-19    | 0           | 0.002904557 | 0.022357716 | 0.010354948 | 0.088920924 |             |
| 0.006470584     | 1.32E-20    | 0.000918792 | 0.004320268 | 0.002665563 | 0.001461891 |             |             |
| 0.000874059     | 0.004381755 | 0.026178548 | 0.037888644 | 0           | 0           | 0.050865655 |             |
| 0.00755521      | 1.68E-19    | 0.010361754 | 0.00039864  | 8.25E-20    | 0           | 0.085647582 | 0           |
| 0.002989703     | 0.144723824 | 0.01054428  | 0           | 0           | 2.53E-19    | 0.04773339  | 0           |

|                 |             |             |             |             |             |             |             |             |
|-----------------|-------------|-------------|-------------|-------------|-------------|-------------|-------------|-------------|
|                 | 0.208360796 | 0           | 0.058442081 | 0.057721155 | 4.38E-18    | 0.00705519  | 0.003148404 | 0.010203593 |
| TCGA-VQ-A94O-01 | 0.078631999 | 0.004886398 | 0.009901286 | 0.001329181 | 0.110489122 |             |             |             |
|                 | 0.004075706 | 0.023543543 | 0           | 0           | 0           | 0.005947813 | 6.1E-20     | 0           |
|                 | 0.003847041 | 0.006481552 | 0.002855709 | 0.003319031 | 0           | 0           | 0.024776149 | 0           |
|                 | 0.481656816 | 1.62E-19    | 0           | 0           | 0.01603603  | 0.063001585 | 0           | 0.035226429 |
|                 | 0.008447859 | 2.93E-18    | 0.000929089 | 0.005013079 | 0.002841631 | 5.86E-21    | 0           |             |
|                 | 0.001448535 | 0.066111493 | 0.027168204 | 0           | 7.97E-18    | 0           | 0.016528974 | 0           |
|                 | 0.001846088 | 0.001435609 | 0           | 0           | 0.102542157 | 0.020491042 | 0.072731283 |             |
|                 | 0.065130752 | 0.015607948 | 3.06E-19    | 0           | 3.56E-19    | 0.029565201 | 0           | 0.219574923 |
|                 | 9.48E-19    | 0.086676421 | 0.145602025 | 5.2E-19     | 0.002780542 | 0.014831273 | 0.017611815 |             |
| TCGA-VQ-A94P-01 | 0.24471302  | 4.37E-19    | 0.005639468 | 0           | 0.016780967 | 0           | 0.013176389 |             |
|                 | 0           | 0.010434134 | 0           | 0.014774542 | 0.063508274 | 0.009655813 | 1.91E-18    | 0.064731969 |
|                 | 0.200275883 | 0           | 0.00170721  | 0.001576375 | 0.011108158 | 0.208773808 | 0.006271097 |             |
|                 | 0.086754172 | 2.1E-19     | 0.48818684  | 1.03E-18    | 0.00505728  | 0.422223649 | 0.113941113 |             |
|                 | 0.004442419 | 0.170168442 | 0.002767827 | 0.017783503 | 0.005956781 | 0.001963644 |             |             |
|                 | 0.025784834 | 2.62E-18    | 4.07E-18    | 0.005464252 | 0.003931678 | 0.042115825 | 0           | 0           |
|                 | 0.110612747 | 0.003193735 | 0           | 0.022891117 | 0.005155786 | 3.72E-18    | 0.065929395 |             |
|                 | 5.73E-18    | 4.38E-18    | 0.118668594 | 6.94E-21    | 0.001491235 | 0.079114268 | 0           | 0.004070907 |
|                 | 4.73E-18    | 0.619351694 | 0           | 0.014501298 | 0.053542474 | 1.16E-19    | 0.088593741 |             |
|                 | 0.348480324 | 0.437074065 |             |             |             |             |             |             |
| TCGA-VQ-A94R-01 | 0.268387935 | 0           | 0.009131459 | 0.021041315 | 0.058973207 | 0.000422354 |             |             |
|                 | 0.003986258 | 9.42E-19    | 0.022208535 | 1.13E-18    | 0.013133717 | 0.025007509 | 0.00280854  |             |
|                 | 0           | 0.024299524 | 0.080714198 | 0.042979245 | 0.001979011 | 0           | 0.008325579 |             |
|                 | 0.017870474 | 0.006154065 | 0.437367384 | 1.05E-19    | 0.047159163 | 8.27E-19    | 0.005258221 |             |
|                 | 0.180622832 | 0           | 0.024435266 | 0.011925855 | 0.001858633 | 0.011008756 | 0           |             |
|                 | 0.005254277 | 0.006245457 | 0           | 4.83E-19    | 0.043238615 | 0.02896304  | 4.06E-18    | 0           |
|                 | 0.014684939 | 1.14E-18    | 0           | 0.003460234 | 9.77E-19    | 1.06E-17    | 0.035430637 | 0           |
|                 | 6.27E-21    | 0.083364708 | 0.003182954 | 0           | 0           | 4.5E-18     | 0.011536964 | 1.03E-18    |
|                 | 0.346671735 | 3.19E-18    | 0.093238755 | 0.035386743 | 0           | 0.045094253 | 0.032514818 |             |
|                 | 0.077609071 |             |             |             |             |             |             |             |
| TCGA-VQ-A94T-01 | 0.003611624 | 2.3E-18     | 3.92E-19    | 1.41E-19    | 0.050215708 | 0.004680115 | 0           |             |
|                 | 0           | 2.64E-18    | 6.35E-18    | 0.005391361 | 3.44E-19    | 5.91E-21    | 1.01E-17    | 0.009008355 |
|                 | 0.015168417 | 0.013303662 | 2.79E-19    | 1.66E-19    | 0.055759898 | 0           | 0.603230526 | 0           |
|                 | 1.25E-18    | 0.002078031 | 0.052114376 | 0.02036833  | 0.082966361 | 0.022937354 |             |             |
|                 | 0.006331669 | 0           | 0.014856081 | 0.007987624 | 0.001538049 | 0           | 0           | 0.06107624  |
|                 | 0           | 4.28E-18    | 0           | 0.022044413 | 0.003301852 | 1.11E-18    | 0.000332781 | 2.19E-19    |
|                 | 4.05E-18    | 0.019601087 | 0.019791659 | 0           | 0.092772202 | 0.022459138 | 0           | 0.018005581 |
|                 | 0.003824483 | 0.069706362 | 2.3E-18     | 0.439290223 | 0           | 0.178810414 | 0.072380184 |             |
|                 | 1.68E-18    | 0.009546195 | 0.027879949 | 0.037426144 |             |             |             |             |
| TCGA-VQ-A94U-01 | 0.098490248 | 0           | 0.006110117 | 0           | 2.94E-18    | 0           | 5.73E-18    | 2.69E-19    |
|                 | 0.021405832 | 0           | 0.009206552 | 4.87E-19    | 0           | 0           | 0.008123616 | 0.071588307 |
|                 | 0.028553467 | 0.002929573 | 0           | 0           | 0.092416874 | 0.005652997 | 0.532737909 |             |
|                 | 3.31E-22    | 0.096818074 | 0           | 0.002264247 | 0.223446021 | 0.005979664 | 0.042594955 |             |

|                 |             |             |             |             |             |             |             |
|-----------------|-------------|-------------|-------------|-------------|-------------|-------------|-------------|
| 0.079046306     | 6.24E-20    | 0.008087485 | 0.001848847 | 2.02E-20    | 0.01126785  | 4.13E-18    | 0           |
| 0.039753037     | 0.038713427 | 0           | 5.64E-18    | 0           | 0.055924823 | 9E-19       | 0.01882555  |
| 2.63E-18        | 0           | 0           | 3.57E-19    | 0           | 0.0506137   | 0           | 0           |
| 0.041156959     | 9.38E-18    |             |             |             |             |             |             |
| 0.023602272     | 7.39E-19    | 0.372121241 | 1.07E-17    | 0.107084526 | 4.12E-18    | 1.9E-18     |             |
| 0.003768665     | 0.094617474 | 0.098386139 |             |             |             |             |             |
| TCGA-VQ-AA64-01 | 0.037284739 | 0.008962574 | 0.148524239 | 0.00622621  | 2.34E-19    |             |             |
| 6.47E-19        | 0           | 3.58E-18    | 0.008178188 | 9.92E-19    | 0.004559261 | 0.008927379 | 1.96E-18    |
| 2.13E-18        | 0.004817539 | 0.027779207 | 0.04065735  | 0.013524272 | 0           | 3.43E-19    |             |
| 0.034678977     | 0           | 0.481236236 | 0           | 0.030929578 | 1.16E-18    | 3.45E-18    | 0.140227111 |
| 3.41E-18        | 0.044640501 | 0.022765108 | 0.000753158 | 0.004996681 | 0.007365344 | 0           |             |
| 0.001877998     | 0           | 0           | 0.02135346  | 0.005129403 | 0           | 3.68E-19    | 0.256484233 |
| 0.020410547     | 0           | 0.002339177 | 0.001174018 | 0           | 0           | 0.027022817 | 0           |
| 0.000140812     |             |             |             |             |             |             |             |
| 0.160949878     | 0.007493979 | 3.91E-18    | 3.43E-19    | 5.53E-18    | 0.02733958  | 0           | 0.428845398 |
| 1.68E-19        | 0.032443401 | 0.061683449 | 1.72E-18    | 0.010604498 | 0.037285564 | 0.047890063 |             |
| TCGA-VQ-AA68-01 | 0.161015399 | 0           | 8.07E-18    | 0.092735991 | 0.005307721 | 0.027221695 |             |
| 8.32E-20        | 0           | 0.019059466 | 0           | 0.002852582 | 0.020244439 | 0.036764508 | 4.39E-19    |
| 0.08450386      | 1.01E-17    | 0.053187586 | 0.000366396 | 0           | 0.006023761 | 0           | 0.016185924 |
| 0.715929846     | 0.0000505   | 0           | 0.003247462 | 3.28E-20    | 0.04974879  | 0.042140042 |             |
| 0.120226428     | 0.002786485 | 0.007356861 | 0.010220008 | 0.009254932 | 0.0173464   |             |             |
| 0.003028468     | 1.42E-18    | 0.03474442  | 0.066579957 | 0.036644305 | 0.003286736 | 0           |             |
| 1.24E-17        | 8.58E-19    | 0.000250089 | 0.019215862 | 0.0000301   | 0.004254079 | 0           |             |
| 0.033314646     | 4.54E-18    | 0.013723289 | 0.039443613 | 0.009994234 | 0           | 0           | 0.003876587 |
| 0.040091439     | 7.54E-18    | 0.313496727 | 2.76E-18    | 0.076915705 | 0.100190356 | 0.00115037  |             |
| 0.111622794     | 0           | 0.111622794 |             |             |             |             |             |
| TCGA-VQ-AA69-01 | 0.118710369 | 0           | 7.63E-19    | 0.026521717 | 0.117627253 | 0.062978423 | 0           |
| 0.011562521     | 1.99E-18    | 1.26E-17    | 0.012355201 | 0.039662184 | 0.033042134 | 0           |             |
| 0.055013597     | 0           | 0.024306684 | 0.00997895  | 0.006080308 | 1.84E-19    | 1.76E-19    | 0           |
| 0.375801755     | 0           | 1.71E-18    | 0           | 0.00014822  | 0           | 0.093632129 | 0.035223224 |
| 0.00113644      | 0.035980027 | 0.034414343 | 0.010048343 | 0.023364971 | 1.08E-18    |             |             |
| 0.007784785     | 0           | 0.054311032 | 0           | 0.010256363 | 0           | 0           | 0.001398865 |
| 0.008099087     |             |             |             |             |             |             |             |
| 0.009330136     | 0.000254423 | 0.002100414 | 6.68E-18    | 0.054979192 | 0.020883643 |             |             |
| 0.028889176     | 0.162908167 | 0.001533387 | 0           | 4.15E-18    | 0.016238832 | 0.013703527 | 0           |
| 0.201968074     | 0           | 0.1615603   | 0.327753084 | 0.074887242 | 0.099632132 | 9.43E-19    |             |
| 0.099632132     |             |             |             |             |             |             |             |
| TCGA-VQ-AA6A-01 | 0.038690425 | 9.08E-19    | 5.81E-18    | 0.004461695 | 0.011249719 | 9.28E-20    |             |
| 2.85E-18        | 0           | 0.018604385 | 0.004367941 | 2.61E-19    | 0           | 4.2E-19     | 4.75E-18    |
| 0.01917264      |             |             |             |             |             |             |             |
| 0               | 0.014711921 | 0.00178205  | 0.000492724 | 0           | 0           | 0.009906003 | 0.591308871 |
| 0               | 5.57E-18    | 1.56E-19    | 0.081925401 | 0           | 0.055567063 | 0           | 0.000694692 |
| 0.007329323     |             |             |             |             |             |             |             |
| 0.010379436     | 0.008330693 | 0.003704319 | 0           | 0           | 0.017909657 | 0.005526049 | 0           |
| 0               | 3.25E-18    | 2.85E-19    | 0.000820198 | 0.000489042 | 0.002433781 | 9.85E-20    | 0.015290519 |
| 2.34E-18        | 3.11E-19    | 0.012128269 | 0.012716599 | 3.73E-19    | 0           | 0           | 0.028807099 |
| 0               |             |             |             |             |             |             |             |
| 0.339041891     | 0.012885371 | 0.045454824 | 0.064171794 | 0           | 0.017217909 | 4.54E-19    |             |
| 0.017217909     |             |             |             |             |             |             |             |
| TCGA-VQ-AA6B-01 | 0.007079749 | 4.18E-20    | 6.91E-18    | 0.014714372 | 0.007897639 | 0.010486687 |             |

|                 |             |             |             |             |             |             |             |             |             |
|-----------------|-------------|-------------|-------------|-------------|-------------|-------------|-------------|-------------|-------------|
| 0               | 0           | 0.011896968 | 1.91E-19    | 0.000760596 | 0           | 2.72E-19    | 0           | 0.005593318 | 0           |
| 0.011350691     | 0.004540416 | 0           | 0           | 0.003621805 | 0           | 0.439766434 | 1.78E-20    | 0           | 0           |
| 0.004128291     | 0.039226657 | 0.014576271 | 0.031277159 | 0.003612789 | 0           | 0           |             |             |             |
| 0.002343239     | 0.004133982 | 0           | 1.27E-19    | 0           | 0.078618697 | 0.01658749  | 0           |             |             |
| 2.76E-18        | 0           | 0.001775639 | 0           | 0.004791967 | 0.002592607 | 0.002232278 | 1.05E-17    |             |             |
| 0.117418095     | 7.26E-18    | 0.001225314 | 0.024321897 | 0.020436609 | 0           | 1.65E-18    |             |             |             |
| 2.82E-18        | 0.034319649 | 0           | 0.310796694 | 0           | 0.093170385 | 0.152939646 | 0           |             |             |
| 0.014053756     | 0.001810903 | 0.015864658 |             |             |             |             |             |             |             |
| TCGA-VQ-AA6D-01 | 0.025793555 | 0.004304212 | 1.2E-17     | 2.22E-19    | 0.076587746 | 0           | 0           |             |             |
| 1.43E-18        | 0           | 3.23E-18    | 0.023693289 | 3.32E-18    | 0           | 4.31E-19    | 8.96E-19    | 0           | 0.004559189 |
| 0.011952292     | 4E-18       | 0           | 0           | 5.23E-19    | 0.517890818 | 0           | 0           | 2.94E-18    | 0.004512124 |
| 0.001544872     | 0.00202986  | 0.045187829 | 5.44E-19    | 0.008840738 | 0.011347068 |             |             |             |             |
| 0.007847702     | 0.00528728  | 0           | 0.006499354 | 0           | 0.055581745 | 0.022158261 |             |             |             |
| 0.005184302     | 0           | 6.41E-18    | 1.55E-18    | 0           | 0           | 0.00100019  | 0.002093829 | 0           |             |
| 0.020096401     | 1.36E-19    | 0.002059696 | 0.020122757 | 0.006826341 | 4.94E-18    | 0           |             |             |             |
| 0.011337497     | 0.040742311 | 6.04E-18    | 0.250931991 | 3.41E-18    | 0.068829559 | 0.193543438 |             |             |             |
| 2.28E-18        | 0.014270766 | 0.002152106 | 0.016422872 |             |             |             |             |             |             |
| TCGA-VQ-AA6F-01 | 0.209303939 | 3.36E-19    | 3.21E-18    | 0.316211143 | 0.001737211 | 0.008965438 |             |             |             |
| 0.002356801     | 0           | 0.009291164 | 0           | 0           | 0.010359053 | 0.045195732 | 4.95E-19    |             |             |
| 0.015196313     | 0           | 0.106402853 | 0.005937398 | 0.002567519 | 0.002186023 | 0.028995837 |             |             |             |
| 0.008367296     | 0.563295934 | 3.24E-20    | 0           | 0.011608443 | 0.005152253 | 0.078990158 |             |             |             |
| 6.28E-20        | 0.039245572 | 0.027564611 | 0.002707326 | 0.005834518 | 0.01622707  |             |             |             |             |
| 0.012933741     | 0.008675944 | 1.47E-19    | 0.107522706 | 0.078511721 | 0.019115318 | 3.7E-18     |             |             |             |
| 1.4E-17         | 0           | 0.016112773 | 0.00262884  | 0.027109415 | 0.000192894 | 0.000260335 |             |             |             |
| 2.7E-19         | 0.031562298 | 0           | 0.00755121  | 0.050092395 | 0.054108011 | 0           | 0           |             |             |
| 0.005831447     | 0.025751043 | 5.91E-18    | 0.294642298 | 1.28E-18    | 0.091967465 | 0.065355    | 0           |             |             |
| 0.235349945     | 0.014497919 | 0.249847863 |             |             |             |             |             |             |             |
| TCGA-VQ-AA6G-01 | 0.041826052 | 8.37E-19    | 6.46E-18    | 0.01373434  | 0.011611163 | 0.005785909 |             |             |             |
| 4.37E-19        | 3.22E-19    | 0.017380298 | 0.000482582 | 3.67E-20    | 0           | 0.003796793 | 0           |             |             |
| 0.021667096     | 9.09E-19    | 0.01554783  | 1.67E-20    | 0           | 0.001486868 | 0.022347637 |             |             |             |
| 0.012201302     | 0.757967139 | 5.25E-20    | 0           | 4.03E-18    | 0.00474398  | 0.017574351 |             |             |             |
| 0.043073684     | 0.121615995 | 0.023786135 | 0.000930575 | 0.000685592 | 0.014864793 |             |             |             |             |
| 0.006204816     | 0.006830334 | 5.99E-18    | 1.53E-19    | 0.003165001 | 0.035827675 | 0.005625748 |             |             |             |
| 1.42E-18        | 1.02E-17    | 0.006705104 | 0           | 0.001719292 | 0.000195643 | 0.008957531 | 0           |             |             |
| 0.031367052     | 0           | 0.009017885 | 0.070256113 | 0.013337984 | 0.00340409  | 0           |             |             |             |
| 5.62E-19        | 0.060542719 | 1.42E-18    | 0.235564732 | 0           | 0.004115328 | 0.090844732 |             |             |             |
| 1.56E-19        | 0.032760786 | 0.011173818 | 0.043934604 |             |             |             |             |             |             |
| TCGA-VQ-AA6I-01 | 0.133944887 | 0           | 0           | 0.07508575  | 4.47E-18    | 0.018489873 | 0           |             |             |
| 0.002064392     | 0.029185352 | 0.018063888 | 0.00119602  | 0.015158777 | 0.030745847 | 0           |             |             |             |
| 0.048260281     | 7.41E-19    | 0.037089518 | 0.008581796 | 4.88E-19    | 0.005363968 | 0.000316618 |             |             |             |
| 0.00923049      | 0.61778207  | 0.000695844 | 0           | 0.002667691 | 0           | 0.086321656 | 0           |             |             |
| 0.05975892      | 0.00611614  | 0.013490672 | 0.013065185 | 0.014075862 | 0.015884535 |             |             |             |             |
| 0.004178767     | 0           | 0.010629352 | 0.076423406 | 7.76E-19    | 7.76E-20    | 6.97E-19    | 4.26E-18    |             |             |
| 0.002376507     | 0           | 0           | 0           | 2.39E-19    | 2.82E-18    | 0.048704956 | 2.58E-18    | 0.007087844 |             |

0.028658517 0.017534871 0.006456573 7.96E-18 0.00172164 0.026984115  
 1.04E-18 0.35047462 0.005570189 0.139032262 0.127919745 2.31E-20 0.090852389  
 0.000158309 0.091010698  
 TCGA-VQ-AA6J-01 0.382599384 1.34E-18 0 0.296270543 0.017048899 0.024783336  
 0.031414927 0 0.012863328 0.008855288 0.003547497 0.0185448 0.021283836  
 0 0.060324196 2.41E-18 0.084228341 0.003405146 0 0.021908695 0.022948919  
 0.000290798 0.411030654 0 0 6.95E-18 0.000218395 0.031062599 0.004438775  
 0.02716693 0.012088028 0.076060973 0.051706115 0.038938446 0.008705488  
 0.007493782 0.0091252 0.120897187 0.053944727 0.01193088 0.001857639 0  
 0 0.013331671 0.00197423 0.017706584 0.000539921 0.000614245 0  
 0.093517174 0.000775106 0.061993471 0.051191543 0.010303268 0.005397268  
 5.09E-18 0.048090727 0.020990659 0 0.273326607 0.001448221 0.091872417  
 0.152385988 0 0.282835454 0.01147446 0.294309914  
 TCGA-VQ-AA6K-01 0.097787898 0 0 0.010876413 0.040053455 0 4.17E-19  
 9.56E-19 0.020317148 0 0.008321578 0.0404721 0.025133919 1.55E-18  
 0.029227994 0.045195452 0.011746002 0 1.11E-18 0.00139954 0.002745414  
 0.007054251 0.613223653 0 0.041935891 9.02E-19 0.005542724 0.081537817  
 0.032574356 0.082428363 0.007711894 0.001894792 0.005284103 0.009358091  
 0.008889547 0.003061634 5.86E-20 0 0.053580232 0.018874523 0 1.29E-19 0  
 0.004846582 0.000657583 0 0.001156841 8.15E-19 0 0.018265215 4.99E-19  
 0.010636499 0.027533558 0.026843066 1.87E-18 0 0 0.06796045 1.58E-18  
 0.395764883 0 0.068292944 0.058961787 4.76E-19 0.047057763 0.022340652  
 0.069398415  
 TCGA-ZA-A8F6-01 0.143702039 0 4.87E-19 0 1.39E-18 0 0.001988789 0  
 0.022142314 7.34E-19 0.001653655 0.007339657 4.68E-19 9.34E-18 0.099110717  
 0.072006456 1.13E-18 0.004706771 0.009889076 0.017816541 0.016799226  
 0.008803327 0.538327955 0 0.238155357 0.014089919 0.011904509 0.165311432  
 0.229169004 0.047005861 0.013239709 0.110988792 0.065830187 0.080615731  
 0.007620683 0.008061682 4.78E-19 4.02E-18 0.029879448 0.022470419 0.027230541  
 7.34E-18 0 0.008023214 0 3.85E-18 0.003343519 0.00197518 2.79E-18  
 0.04563897 3.44E-18 2.3E-19 0.039308118 0.0000472 2.38E-20 0.010184742  
 1.37E-18 0.029539563 0 0.406363114 3.4E-18 0.01283 0.024262641 1.09E-17  
 0.121183147 0.127477291 0.248660438  
 TCGA-ZQ-A9CR-01 0.190925584 0.001842239 0.135856096 0.005654021 0.085290951  
 2.14E-20 0 4.24E-18 0 0 0.013683631 0.015119394 0.001890885 1.99E-18  
 0.036522625 0.03907324 1.49E-19 0.015371629 0 0.007673488 0.174936482 0  
 0.502349822 0 0.079385018 7.39E-18 0.003951642 0.180254784 0.082195302  
 0.035821047 0.113470498 0.027246966 0.043064628 1.59E-18 8.34E-20 0.011654035  
 0.002039877 2.57E-18 0.082862404 0.02391767 0.012635572 6.21E-19 0.074413709  
 0.080077021 0.001074392 0 0.001283175 0.00295593 2.14E-17 0.141451421 0  
 0.028971369 0.157492613 0.016131311 0 0 1.68E-17 0.062726512 0.001090729  
 0.293896401 0 0.1459742 0.120640946 1.38E-18 0.047523581 0.128081869  
 0.17560545

Table-S5(MCPcounter): Infiltration level of tumor associated immune cells in STAD estimated by using mMCP-counter algorithms.

| sample          | T.cells                 | CD8.T.cells  | Cytotoxic.lymphocytes | B.lineage   | NK.cells     | Monocytic.lineage |
|-----------------|-------------------------|--------------|-----------------------|-------------|--------------|-------------------|
|                 | Myeloid.dendritic.cells | Neutrophils  | Endothelial.cells     | Fibroblasts |              |                   |
| TCGA-3M-AB46-01 | -0.689735714            | -1.0862      | -3.092771429          | -3.5090875  | -4.8309      | 1.011528571       |
|                 | -2.2769                 | -0.222733333 | 0.586996774           | 5.7014875   |              |                   |
| TCGA-3M-AB47-01 | 1.322692857             | 0.044        | 0.101471429           | 2.1990375   | -3.13695     | 1.584842857       |
|                 | -0.29926                | -0.62092     | 2.769767742           | 7.7482625   |              |                   |
| TCGA-B7-5816-01 | 1.359107143             | 0.3907       | 0.126371429           | -0.2923875  | -1.4299125   |                   |
|                 | 3.957814286             | -1.43434     | 2.024973333           | 1.88256129  | 8.514925     |                   |
| TCGA-B7-5818-01 | 1.29335                 | 2.2268       | -0.994585714          | -1.8475375  | -2.637225    | 3.323885714       |
|                 | -0.68184                | -0.061366667 | 0.72893871            | 6.2959375   |              |                   |
| TCGA-B7-A5TI-01 | 0.770471429             | 0.4657       | -0.5376               | 1.3206625   | -2.5335625   | 2.7752            |
|                 | -1.49394                | -0.6539      | 2.795222581           | 7.3970375   |              |                   |
| TCGA-B7-A5TJ-01 | -0.701735714            | -1.8314      | -3.250157143          | -1.8438375  | -5.8741      | 1.237457143       |
|                 | -1.70634                | -0.341953333 | 1.28226129            | 6.01455     |              |                   |
| TCGA-B7-A5TK-01 | 2.552907143             | 4.3385       | 2.2312                | -1.23905    | -1.214075    | 3.849042857       |
|                 | 0.38256                 | -0.0676      | 1.66133871            | 7.61735     |              |                   |
| TCGA-B7-A5TN-01 | 0.546507143             | -0.1665      | -2.089214286          | -2.1004375  | -5.2200625   | 2.7303            |
|                 | -2.65098                | 0.440686667  | 2.010803226           | 8.5042      |              |                   |
| TCGA-BR-4187-01 | 1.5131                  | 2.5585       | 0.514928571           | 1.3370625   | -2.085075    | 4.232385714       |
|                 | 0.90496                 | 2.037066667  | 2.876312903           | 8.874875    |              |                   |
| TCGA-BR-4191-01 | 2.254657143             | 2.4465       | 0.858185714           | 1.8277875   | -1.4498375   |                   |
|                 | 4.948728571             | 2.61386      | 1.94952               | 2.867293548 | 7.0430125    |                   |
| TCGA-BR-4201-01 | 1.521478571             | -0.4719      | 0.916742857           | 1.4007      | -0.7034625   | 3.772814286       |
|                 | -0.01304                | 2.032173333  | 2.055158065           | 8.1696875   |              |                   |
| TCGA-BR-4253-01 | 3.174771429             | 4.2691       | 3.467657143           | 0.681775    | -0.5059125   | 5.207242857       |
|                 | 0.09852                 | 1.218793333  | 1.459580645           | 5.5929375   |              |                   |
| TCGA-BR-4255-01 | 1.410737653             | 2.633647772  | 0.200697356           | 1.401428161 | -2.808314521 |                   |
|                 | 3.512304629             | 0.428617941  | 0.623289619           | 2.656836051 | 8.822218278  |                   |
| TCGA-BR-4256-01 | 2.200221429             | 2.8877       | 1.733928571           | 0.7126625   | -1.581       | 4.657785714       |
|                 | -0.34424                | 2.694413333  | 2.846954839           | 8.4818875   |              |                   |
| TCGA-BR-4257-01 | 1.352028571             | 1.9226       | 0.726                 | -1.675525   | -2.3939875   | 3.827628571       |
|                 | 0.7754                  | 1.14774      | 1.504174194           | 7.4978375   |              |                   |
| TCGA-BR-4267-01 | 0.491921429             | 0.1776       | -1.774414286          | 0.5967375   | -3.6239      | 3.182871429       |
|                 | -0.33086                | 1.942266667  | 1.318893548           | 6.14375     |              |                   |
| TCGA-BR-4279-01 | 1.328578571             | 3.2034       | 1.561928571           | -0.070275   | -0.6445      | 3.728185714       |
|                 | 0.90986                 | 1.66666      | 2.68286129            | 8.3539875   |              |                   |
| TCGA-BR-4280-01 | 1.3541                  | 1.2756       | 0.431114286           | -1.469575   | -2.8399      | 2.6785            |
|                 | -0.94482                | 1.012573333  | 0.558480645           | 5.3787625   |              |                   |
| TCGA-BR-4292-01 | 1.68795                 | 1.7009       | 1.046171429           | 0.0773875   | -1.9465875   | 2.841671429       |
|                 | -0.1972                 | 1.421626667  | 0.954364516           | 5.2136625   |              |                   |
| TCGA-BR-4294-01 | -1.581714286            | -1.4699      | -4.336214286          | -2.98465    | -5.3859      | 1.551385714       |
|                 | -4.04026                | -0.37628     | 0.469787097           | 3.91985     |              |                   |

TCGA-BR-4357-01 2.166614286 2.2753 1.4822 1.2586125 -1.4515125 4.152485714  
0.22366 1.529126667 1.549132258 6.8914

TCGA-BR-4361-01 2.344107143 2.2482 1.220014286 -0.6126875 -1.82925 3.901628571  
-0.18006 0.39736 1.442374194 7.3895625

TCGA-BR-4362-01 1.586385714 2.1957 1.524928571 0.8546125 -0.6616875  
3.234471429 -0.80244 1.47808 1.452919355 6.17095

TCGA-BR-4363-01 1.7499 2.496 1.775214286 1.2531375 -0.7385625 4.2684  
0.81148 1.690493333 2.001983871 7.6965625

TCGA-BR-4366-01 0.420085714 3.9589 -1.1582 -0.7301 -3.2219625 3.127957143  
-1.30938 1.966993333 1.411270968 6.0860875

TCGA-BR-4367-01 1.507064286 1.9415 -0.527928571 0.2624 -3.89205 4.1866  
-0.54136 0.71414 2.252516129 7.3347

TCGA-BR-4368-01 2.2023 2.8442 1.9794 1.6755625 -1.843175 3.681271429  
0.5286 0.372486667 2.003796774 7.388075

TCGA-BR-4369-01 2.322035714 1.3567 -0.085585714 1.0273 -2.3032375 3.802942857  
2.14064 1.311553333 1.413641935 6.8762625

TCGA-BR-4370-01 1.983514286 1.9034 1.811928571 1.837475 -1.392875 3.932014286  
0.93184 2.599666667 2.48193871 8.3015

TCGA-BR-4371-01 1.0874 0.5568 -0.116228571 -1.81025 -2.07055 2.168714286  
-0.10856 0.526766667 0.521351613 4.8950125

TCGA-BR-6452-01 1.901042857 1.5514 1.560028571 0.38705 -0.846725 3.603657143  
0.9877 0.542826667 1.872719355 7.3536125

TCGA-BR-6453-01 2.652307143 2.727 -1.210557143 5.3559375 -2.84775 3.087414286  
1.84352 -0.04074 2.226309677 7.059375

TCGA-BR-6453-11 1.427292857 1.1447 -0.518242857 2.1268875 -2.5767125  
1.940871429 -0.15546 1.000546667 1.121590323 5.5710625

TCGA-BR-6454-01 2.4892 3.4344 1.590042857 2.057075 -1.05095 3.239828571 0.04102  
1.50032 1.728445161 6.3321875

TCGA-BR-6454-11 1.906007143 1.2756 -0.011214286 3.641525 -1.72655 2.4634  
-0.46012 1.263493333 1.194496774 6.4934125

TCGA-BR-6455-01 1.7876 3.3521 0.6285 0.6377875 -0.5867875 3.834985714  
1.45022 0.415793333 2.074832258 6.9691375

TCGA-BR-6456-01 2.058607143 1.7786 0.209371429 1.5327375 -2.6021625 3.4574  
0.43054 1.316306667 2.966896774 8.8707375

TCGA-BR-6457-01 1.425385714 2.1247 -0.604557143 2.592725 -1.721675 2.591742857  
1.01988 0.185726667 2.9904 9.1655

TCGA-BR-6457-11 1.463192857 2.4198 -0.136285714 1.6684 -1.813875 1.681842857  
0.97522 0.71284 1.480764516 6.2472125

TCGA-BR-6458-01 2.372521429 2.3704 0.497714286 1.4384375 -1.319125 4.0519  
0.71716 -0.402986667 2.642970968 8.0633

TCGA-BR-6458-11 1.3273 1.4174 -0.093442857 1.8169 -1.9144875 1.615142857  
-2.08706 0.012366667 1.039022581 4.9791125

TCGA-BR-6563-01 2.067642857 3.6578 0.525828571 3.382875 -2.0324625 3.020114286  
0.75064 0.177153333 2.288677419 8.0352

TCGA-BR-6564-01 1.435814286 1.9073 -2.032171429 1.1700125 -3.1390875  
2.139657143 0.41846 -0.36698 2.817767742 8.604075

TCGA-BR-6564-11 1.915178571 2.0147 -0.881928571 2.377 -2.8681125 2.461614286  
0.63164 1.753173333 2.046348387 6.8169

TCGA-BR-6565-01 2.017264286 2.2175 0.710485714 1.7421375 -1.7447125  
3.584942857 -0.55508 0.250706667 1.91356129 7.639475

TCGA-BR-6566-01 0.408357143 1.0573 -0.182142857 -1.2358625 -1.4443875  
2.519185714 -1.16386 -0.865766667 0.249109677 7.529925

TCGA-BR-6705-01 1.150621429 0.7579 0.059585714 1.6120625 -2.9898875  
2.313685714 0.63398 0.920933333 3.693380645 9.0020625

TCGA-BR-6706-01 2.4794 4.5976 2.350242857 1.6191875 -0.997775 3.359428571  
-0.0093 0.0302 2.341896774 7.901375

TCGA-BR-6707-01 1.598678571 3.7313 1.240371429 0.065725 -1.622375 2.823442857  
-1.65494 -0.87546 1.078990323 5.5974

TCGA-BR-6709-01 2.4754 4.0144 1.183671429 1.79215 -1.278625 4.548728571  
-0.25148 0.19326 1.469035484 6.87075

TCGA-BR-6710-01 -0.451171429 0.03 -2.455371429 -2.1532375 -3.66015 -0.262785714  
-2.91392 -0.12188 0.81333871 5.0808625

TCGA-BR-6801-01 -0.737964286 -1.1811 -0.935514286 -2.3838625 -5.068075  
1.030171429 -2.49898 0.16998 1.354267742 7.18995

TCGA-BR-6802-01 1.903414286 2.8701 1.917671429 1.987575 -0.4606 3.427685714  
-0.14814 1.281046667 1.733312903 7.0131

TCGA-BR-6802-11 0.397242857 2.7379 0.368442857 -1.601 -2.79645 0.304828571  
-0.58702 -0.540373333 0.449529032 4.6600625

TCGA-BR-6803-01 1.91495 2.96 0.475385714 2.3994125 -1.789575 2.828071429  
0.78774 -0.329713333 2.983151613 8.1817875

TCGA-BR-6852-01 2.647771429 4.6628 2.953957143 1.31265 -0.098475 3.937042857  
-0.15664 0.46758 1.562380645 7.2080375

TCGA-BR-6852-11 1.224221429 1.8879 -0.155071429 1.658625 -2.7705 1.966785714  
0.07278 0.46232 0.734064516 4.5906875

TCGA-BR-7196-01 1.801442857 3.002 0.966785714 2.2243125 -0.6226625  
3.423785714 0.63126 0.35188 3.321519355 8.4905625

TCGA-BR-7197-01 -0.532571429 -2.2447 -3.206442857 -1.176525 -4.9345875  
0.996328571 -1.9534 -1.19408 1.6388 6.862025

TCGA-BR-7703-01 1.035657143 0.7664 -1.657757143 -0.202175 -3.1745375  
1.230685714 -0.84568 -0.07616 0.6871 5.45365

TCGA-BR-7703-11 1.276357143 1.2756 -0.203214286 1.646925 -3.2450625 1.837428571  
-1.38074 1.2877 1.501990323 5.5188

TCGA-BR-7704-01 2.944942857 2.7465 1.0397 1.6925875 -1.426875 2.902771429  
2.17576 0.15956 1.391883871 6.6241

TCGA-BR-7704-11 1.829785714 2.0912 -0.392157143 2.0370375 -2.3333125  
2.257142857 -0.29456 1.974286667 2.615619355 8.37605

TCGA-BR-7707-01 0.663764286 1.0007 -0.467357143 -2.2588 -2.1463125 1.996842857  
-4.54308 0.606453333 1.059629032 6.832875

TCGA-BR-7715-01 0.328042857 1.1382 -3.3506 -3.254075 -4.65265 1.849957143  
-1.65644 -0.163846667 2.072216129 7.675025

TCGA-BR-7715-11 3.058907143 2.8034 0.771614286 4.9363 -1.9746625 2.99 0.95268  
1.82656 1.258019355 5.6277

TCGA-BR-7716-01 2.662535714 5.0989 1.109785714 1.462775 -2.213075 3.921514286  
0.53882 0.78892 1.830370968 7.1144375

TCGA-BR-7716-11 1.722721429 2.5756 0.775514286 1.5529 -1.78195 2.473828571  
0.38728 1.787733333 1.928764516 6.8694875

TCGA-BR-7717-01 -0.506928571 1.816 -3.186371429 0.4793125 -4.9601125  
0.842042857 -2.3269 -0.3913 1.521158065 6.8910875

TCGA-BR-7717-11 2.63225 2.9109 0.667685714 4.9214875 -2.0863375 2.674485714  
1.30838 1.291753333 1.274951613 5.94885

TCGA-BR-7722-01 0.716128571 0.099 -1.421714286 0.3345875 -2.71635 2.189171429  
-0.14506 -0.431886667 1.775693548 6.8055125

TCGA-BR-7723-01 1.748578571 4.1376 0.517828571 1.0106375 -1.9526 3.2697  
-0.00306 -0.82554 1.972948387 6.7618625

TCGA-BR-7851-01 1.712342857 1.5415 0.599442857 1.9358375 -0.7414875  
2.979985714 -0.99362 -0.04266 1.920058065 7.6829875

TCGA-BR-7851-11 0.844957143 1.5465 -0.117314286 1.6769 -1.9135 1.728814286  
0.02248 1.171673333 1.207254839 5.8062875

TCGA-BR-7901-01 1.685671429 1.5854 -0.9607 0.7823375 -2.6695 3.323114286  
1.22326 1.773006667 2.773880645 7.9178875

TCGA-BR-7957-01 1.011357143 1.4174 -0.974285714 -0.565625 -3.5051625  
2.837657143 0.6209 1.935213333 3.528425806 9.1599

TCGA-BR-7958-01 3.054928571 4.3392 1.958528571 0.4354875 -1.0748375  
4.146471429 2.42862 0.681746667 1.706887097 7.4864375

TCGA-BR-7959-01 0.643292857 1.7786 -1.170471429 0.0026375 -3.5980875  
3.374542857 -1.0569 1.055146667 2.88156129 8.53405

TCGA-BR-8058-01 2.8661 2.6918 1.507842857 3.1843375 -1.999475 4.096185714  
1.78896 1.683646667 2.334396774 7.5409

TCGA-BR-8059-01 -0.055128571 -0.5332 -1.8176 -1.3886125 -3.1749875 1.433871429  
-2.13704 0.22378 2.059754839 8.3492125

TCGA-BR-8060-01 1.4266 0.4233 0.155628571 1.6485375 -1.6631875 3.7009  
0.04444 1.085926667 2.674564516 7.62195

TCGA-BR-8060-11 0.421614286 1.5612 -0.422257143 1.085625 -3.0049375 0.474014286  
-1.6839 0.838533333 1.188796774 6.4289875

TCGA-BR-8077-01 1.638571429 4.8059 0.600757143 -0.4557 -2.714275 2.637228571  
1.07888 0.376646667 1.719258065 5.867025

TCGA-BR-8078-01 1.849571429 2.7972 2.093357143 -0.5217 -0.4753875 3.823714286  
-0.32874 1.252993333 1.530035484 7.1099875

TCGA-BR-8080-01 1.822707143 1.3567 0.645885714 3.2299125 -1.6257375  
3.512385714 0.65966 0.88478 3.200706452 8.6681625

TCGA-BR-8081-01 2.446492857 2.2452 1.060285714 3.0420375 -1.8567625  
3.862114286 0.26282 0.442373333 1.770880645 7.440025

TCGA-BR-8284-01 2.754578571 3.8866 1.933542857 1.5712125 -1.4170875  
3.796657143 0.89694 0.62584 2.476480645 7.594325

TCGA-BR-8286-01 1.174085714 1.6281 -0.027142857 -0.1367625 -2.738225  
2.795728571 1.42142 0.126586667 2.549822581 6.7590375

TCGA-BR-8289-01 0.3073 0.9268 -1.145042857 0.3042875 -3.8082125 2.819785714  
-1.00676 -0.876166667 1.754593548 7.4960625

TCGA-BR-8291-01 1.960621429 2.409 1.017385714 0.8779 -1.08585 4.110371429  
2.2358 0.993953333 3.475074194 8.831625

TCGA-BR-8295-01 -0.697578571 -0.6873 -2.171314286 0.84155 -4.2360125 0.5035  
-1.89362 -0.108666667 1.614209677 5.1409

TCGA-BR-8296-01 2.64645 1.8484 0.339257143 4.794225 -1.6304375 3.139785714  
0.66018 1.175246667 2.519503226 6.654925

TCGA-BR-8297-01 1.361542857 0.9716 -0.124742857 2.41425 -2.58365 2.225071429  
-0.87908 -0.994253333 2.402429032 8.201175

TCGA-BR-8361-01 1.64685 2.8117 1.361471429 -0.3350875 -0.1690375 2.247828571  
-2.51378 0.34488 1.138745161 5.7437875

TCGA-BR-8362-01 2.160592857 2.685 1.030871429 0.3648125 -0.6684125 3.5936  
-0.02546 1.083053333 2.806209677 7.9413375

TCGA-BR-8363-01 2.624171429 3.5349 2.069528571 2.00895 -0.21905 3.344871429  
0.60756 0.85428 1.661612903 6.9053

TCGA-BR-8364-01 2.1358 2.1444 1.113614286 2.3459875 -1.2152 4.003557143  
1.2012 0.776713333 3.095609677 9.7215375

TCGA-BR-8365-01 2.184442857 2.2901 0.448928571 2.5549625 -2.8308 3.092642857  
0.636 0.30976 3.291774194 8.615275

TCGA-BR-8366-01 2.886592857 3.9242 1.880742857 3.095975 0.2755 4.231285714  
0.21484 0.447393333 1.880116129 7.1335875

TCGA-BR-8367-01 1.088885714 0.8726 0.082457143 0.9461875 -2.113775  
3.326214286 0.80764 0.854126667 3.118493548 8.204

TCGA-BR-8368-01 1.429407143 1.46 -0.363714286 0.40215 -1.92 1.556185714  
-1.45022 -0.028753333 1.845690323 5.2683625

TCGA-BR-8369-01 0.640107143 0.5666 -2.022814286 2.5876625 -2.286675  
1.574671429 -1.15064 0.149846667 2.400293548 7.3733125

TCGA-BR-8371-01 1.6207 0.8961 -1.826042857 4.390275 -4.1990125 1.469514286  
-0.46762 -1.358213333 1.727025806 7.67125

TCGA-BR-8372-01 1.913242857 2.5658 1.186271429 0.3326 -1.2750375 3.500314286  
2.1619 0.160006667 0.848858065 5.7887

TCGA-BR-8373-01 1.491364286 2.0111 -1.2779 0.2113 -3.3161875 3.539242857  
0.8988 2.356746667 2.799922581 8.1408625

TCGA-BR-8380-01 1.174307143 0.3685 -0.500442857 1.7582375 -2.6028 2.506542857  
-0.42432 0.40328 2.484464516 9.1755375

TCGA-BR-8381-01 2.676442857 2.9729 0.863214286 2.448225 -1.6324 3.586771429  
0.86982 -0.538433333 1.519625806 6.710575

TCGA-BR-8382-01 0.678042857 -0.5756 0.608414286 -0.6327625 -0.6139375  
2.688828571 -0.72438 0.916573333 1.297329032 7.45445

|                 |              |              |              |             |            |             |
|-----------------|--------------|--------------|--------------|-------------|------------|-------------|
| TCGA-BR-8384-01 | 2.431185714  | 2.7465       | 0.717714286  | 1.7597      | -1.8280375 | 3.047928571 |
|                 | 1.71374      | -0.096413333 | 3.31023871   | 8.9239375   |            |             |
| TCGA-BR-8483-01 | -0.993721429 | 0.044        | -1.294985714 | -3.513025   | -3.2481125 |             |
|                 | 0.642071429  | -3.55726     | -1.250753333 | 0.344367742 | 5.7539     |             |
| TCGA-BR-8484-01 | 2.724564286  | 2.1606       | 0.950842857  | 2.1781875   | -2.59265   | 3.994928571 |
|                 | 0.94388      | 1.301386667  | 2.406458065  | 6.818       |            |             |
| TCGA-BR-8485-01 | 2.288921429  | 2.824        | 1.608885714  | 1.5133      | -0.9959125 | 3.088671429 |
|                 | 0.5161       | 1.229653333  | 2.706696774  | 7.60235     |            |             |
| TCGA-BR-8486-01 | 2.254278571  | -0.3022      | -0.596942857 | 0.7056375   | -2.7083875 |             |
|                 | 2.675942857  | 0.40692      | 1.342446667  | 2.916822581 | 7.239375   |             |
| TCGA-BR-8487-01 | 0.155021429  | -0.0277      | -3.406914286 | -2.1547     | -1.78835   | 2.045171429 |
|                 | -1.3547      | -1.034633333 | 0.467445161  | 5.62475     |            |             |
| TCGA-BR-8588-01 | 1.592457143  | 2.2753       | 0.449585714  | 2.4434875   | -1.910275  |             |
|                 | 2.732528571  | 0.49088      | 1.56086      | 2.096103226 | 7.5073875  |             |
| TCGA-BR-8589-01 | 2.640578571  | 4.3903       | 2.390371429  | -1.1263875  | -0.1512125 | 3.7279      |
|                 | 2.15052      | 0.57898      | 1.289051613  | 4.3036      |            |             |
| TCGA-BR-8590-01 | 2.129821429  | 1.816        | 0.701342857  | 2.5056375   | -1.9810875 |             |
|                 | 4.043714286  | 1.34576      | 1.197506667  | 2.620258065 | 8.5732375  |             |
| TCGA-BR-8591-01 | 1.506707143  | -0.5332      | -0.0686      | 1.4417375   | -2.1598625 | 3.347371429 |
|                 | 0.10906      | 0.50854      | 2.291341935  | 7.177425    |            |             |
| TCGA-BR-8592-01 | 1.900378571  | 1.4011       | 0.302414286  | 3.4172875   | -3.3016    | 2.851042857 |
|                 | 0.54176      | 0.93288      | 2.865390323  | 8.791475    |            |             |
| TCGA-BR-8676-01 | -0.108907143 | 2.4985       | -2.287642857 | -4.079825   | -2.391125  |             |
|                 | 2.088071429  | -2.47466     | -0.245973333 | 0.202190323 | 3.8660875  |             |
| TCGA-BR-8677-01 | 2.547592857  | 3.4609       | 2.224014286  | 0.16935     | -1.259     | 2.890957143 |
|                 | 0.1689       | -0.035766667 | 3.184980645  | 8.0562625   |            |             |
| TCGA-BR-8678-01 | 1.157214286  | 4.4771       | -0.253342857 | -1.111675   | -2.320425  |             |
|                 | 2.063571429  | -1.9428      | -0.040153333 | 1.533287097 | 6.887625   |             |
| TCGA-BR-8679-01 | -0.572114286 | -1.0262      | -2.344242857 | -1.2627125  | -4.0806    | 3.312814286 |
|                 | -1.61846     | 0.099046667  | 2.380303226  | 7.608825    |            |             |
| TCGA-BR-8680-01 | -0.935442857 | -0.3566      | -2.395814286 | -0.28235    | -4.7736    | 0.329285714 |
|                 | -3.54942     | -1.385646667 | 0.077132258  | 6.1540625   |            |             |
| TCGA-BR-8682-01 | 1.403021429  | 0.7407       | -0.372528571 | 1.9224875   | -2.1355875 |             |
|                 | 3.622357143  | 1.53378      | 0.820633333  | 2.647541935 | 7.867975   |             |
| TCGA-BR-8683-01 | 2.155064286  | 2.3019       | -0.017471429 | 1.766       | -3.443875  | 3.440771429 |
|                 | 1.5212       | 1.318846667  | 3.491241935  | 8.3361375   |            |             |
| TCGA-BR-8686-01 | 2.585092857  | 3.3521       | 1.808871429  | 2.9292375   | -1.36075   | 3.550114286 |
|                 | 0.8122       | 0.617573333  | 2.922570968  | 7.20535     |            |             |
| TCGA-BR-8687-01 | -0.005328571 | -1.4699      | -3.508842857 | -1.6098875  | -3.94745   | 1.6899      |
|                 | -0.79246     | 0.195706667  | 1.539983871  | 7.05865     |            |             |
| TCGA-BR-8690-01 | 1.767485714  | 2.3106       | 1.0297       | 0.03225     | -2.5789875 | 2.409957143 |
|                 | -1.71528     | -0.756133333 | 0.25826129   | 6.457125    |            |             |
| TCGA-BR-A44T-01 | 3.079785714  | 2.6371       | 1.2902       | 6.2873125   | -1.0036375 | 2.436871429 |
|                 | 1.52462      | -1.3194      | 1.198848387  | 7.226575    |            |             |

TCGA-BR-A44U-01 -1.098364286 -2.5479 -4.475428571 -3.1697375 -5.4173125  
0.508557143 -2.98308 -1.062586667 0.956767742 6.1227375

TCGA-BR-A452-01 1.464971429 6.771 -0.843042857 1.9469 -4.586125 0.797685714  
-1.1834 -0.257593333 1.306016129 6.0809125

TCGA-BR-A453-01 0.924357143 1.7316 -0.677714286 -0.6648 -3.621 1.891171429  
0.34374 -0.69274 2.309274194 9.3434

TCGA-BR-A4CR-01 -0.398478571 -1.7322 -0.577942857 0.0875375 -4.5548625  
1.722128571 -5.02916 0.68946 1.414990323 5.7204125

TCGA-BR-A4CS-01 -0.824778571 -1.7809 -3.678314286 -3.8761125 -6.37345 1.923542857  
-3.09722 0.88084 1.548745161 6.1569625

TCGA-BR-A4IU-01 2.002092857 2.4144 0.390742857 4.2701 -2.0744875 3.089628571  
1.50396 0.245826667 2.439364516 8.5522125

TCGA-BR-A4IV-01 0.815857143 0.3346 -0.945685714 1.10065 -2.11575 2.2527 0.31392  
0.627526667 2.990167742 9.8788

TCGA-BR-A4IY-01 2.00475 2.4857 1.047957143 0.374475 -1.6807375 3.362557143  
0.07556 0.08014 1.583380645 8.628125

TCGA-BR-A4IZ-01 1.768778571 1.4228 0.765342857 1.4162125 -1.701425 3.2454  
1.19894 0.758433333 3.501545161 9.5017625

TCGA-BR-A4J1-01 -0.504357143 1.949 -2.544142857 -2.08535 -4.336125 0.778014286  
-2.39866 -0.31674 1.246519355 5.5541

TCGA-BR-A4J2-01 2.528457143 2.6019 0.5634 5.33885 -2.225375 2.816757143  
0.92084 1.418773333 3.170754839 8.711875

TCGA-BR-A4J4-01 0.873 1.2333 -0.356042857 0.35835 -1.7598375 3.219185714  
1.5282 0.751106667 1.325948387 6.8313625

TCGA-BR-A4J5-01 1.016292857 0.4967 0.164185714 1.233125 -3.3702125 2.996828571  
0.3194 0.311613333 2.51116129 8.789225

TCGA-BR-A4J6-01 0.18815 0.1388 -0.3218 0.3063375 -5.512 0.879985714 -0.9533  
-0.8511 0.995912903 6.6677125

TCGA-BR-A4J7-01 2.17265 4.0242 1.572471429 0.3638375 -0.7784375 2.986071429  
0.0416 -0.2864 2.190274194 8.29215

TCGA-BR-A4J8-01 0.0292 -0.2845 -1.272414286 0.63555 -3.971025 1.275857143  
-0.99644 -1.1703 2.130903226 7.0894625

TCGA-BR-A4J9-01 1.173007143 0.5859 -2.048057143 2.68975 -3.1186375 1.418571429  
-1.91816 -1.37228 2.22423871 8.158325

TCGA-BR-A4PD-01 1.351907143 0.8082 -0.144471429 -0.222275 -2.0999125  
2.949371429 0.39452 0.103193333 1.729903226 5.92815

TCGA-BR-A4PE-01 1.60625 -0.4521 -1.085928571 0.0088375 -3.3291125 3.739885714  
0.67654 -0.225953333 1.522232258 7.1440625

TCGA-BR-A4PF-01 1.72055 3.3364 0.380614286 -1.3189125 -2.3856125 3.647471429  
-1.07008 2.706313333 0.835387097 5.5574875

TCGA-BR-A4QI-01 0.575507143 1.0151 -0.972871429 -1.95925 -3.337475 2.559685714  
-0.27708 -0.82776 0.943829032 5.7948

TCGA-BR-A4QL-01 -0.486321429 1.177 -1.799614286 -2.4884375 -3.3358375  
0.250028571 -2.37228 -2.98042 -1.153470968 4.495375

TCGA-BR-A4QM-01 0.459428571 1.0433 -3.745871429 2.2991625 -3.70765 0.608457143  
-1.20996 -2.38206 -0.265951613 4.601175

TCGA-CD-5798-01 0.367064286 1.2576 -1.9299 -1.721725 -2.832725 2.573385714  
1.30012 0.22236 2.14753871 8.987725

TCGA-CD-5799-01 -1.615628571 -1.0262 -3.259142857 -2.8662625 -5.1267375  
1.278714286 -3.03798 0.477586667 1.294032258 6.8258375

TCGA-CD-5800-01 0.5532 2.9413 -1.7667 1.473 -3.3409375 1.753785714  
-0.84192 1.32326 1.528803226 6.5440875

TCGA-CD-5801-01 2.193021429 4.4647 1.169371429 -0.4071875 -1.31865 2.845442857  
-0.37168 -0.839393333 0.158503226 5.50635

TCGA-CD-5803-01 3.403221429 4.2973 1.620828571 3.8938875 -1.79185 3.853714286  
2.01034 0.134186667 3.205974194 8.93925

TCGA-CD-5804-01 0.854885714 1.2934 -1.148785714 -0.4643625 -3.187425  
3.030485714 -1.04874 1.55506 2.343629032 7.6748

TCGA-CD-5813-01 2.268014286 3.0181 0.621285714 2.8461625 -2.551275  
3.676514286 1.36818 0.57734 3.269245161 8.0367625

TCGA-CD-8524-01 1.085835714 2.128 -0.069842857 0.8201 -3.0778125 2.609957143  
-0.59616 0.504353333 2.384070968 7.2731875

TCGA-CD-8525-01 1.141442857 2.7444 1.079671429 2.2537875 -2.0241375  
2.619942857 -1.27848 0.438266667 1.4869 6.1780375

TCGA-CD-8526-01 1.782892857 2.1378 -1.034614286 2.212 -2.68695 2.663628571  
1.37648 0.81048 2.592374194 6.4661

TCGA-CD-8527-01 0.12975 2.0707 -1.0889 -1.31835 -4.3910875 2.357014286  
-3.94732 -0.02 0.672751613 6.0990375

TCGA-CD-8528-01 -0.328814286 -0.7346 -1.726014286 -2.0606375 -3.31115 3.048471429  
-1.26366 1.184293333 0.981125806 6.9044875

TCGA-CD-8529-01 2.421821429 2.2237 0.917757143 3.835375 -1.9030625 4.4421  
1.02886 0.996306667 3.065977419 7.9421625

TCGA-CD-8530-01 0.857521429 1.0151 -1.243257143 1.4491875 -2.5422875  
2.538842857 0.64078 0.7048 3.604174194 8.220075

TCGA-CD-8531-01 -0.245457143 -0.5543 -1.613228571 5.363675 -5.6156375 3.0556  
-0.0328 -1.35548 0.918719355 6.59675

TCGA-CD-8532-01 2.839885714 2.5213 -0.381771429 2.1002625 -2.70235 3.449285714  
1.50152 0.491933333 1.882322581 6.651375

TCGA-CD-8533-01 0.462814286 -0.1993 -1.559614286 0.547 -3.995125 1.809914286  
-1.18906 0.9502 1.841890323 6.675675

TCGA-CD-8534-01 1.088892857 0.4967 -0.690157143 1.3214 -2.78585 1.836885714  
-0.59194 0.484273333 1.843264516 5.995475

TCGA-CD-8535-01 -0.667 -3.6259 -1.504785714 -0.4329625 -3.8259375 1.395242857  
-6.20606 -0.87624 1.308922581 6.3582625

TCGA-CD-8536-01 1.101157143 2.1862 0.585314286 0.4428375 -3.339 1.853471429  
-1.6278 -0.26826 0.763835484 7.4857375

TCGA-CD-A486-01 0.039364286 0.5666 -2.6551 -1.2626 -5.854125 2.585885714  
-2.39484 1.724533333 1.013419355 6.6490375

TCGA-CD-A489-01 1.499592857 2.1013 -0.172757143 2.799975 -3.1852875 2.433085714  
-1.3469 -0.334586667 1.987206452 7.9537

TCGA-CD-A48A-01 -0.467357143 -0.3383 -2.095014286 -0.6639875 -3.14185 1.930257143  
-1.56326 -0.682273333 0.315658065 5.7170125

TCGA-CD-A48C-01 0.190678571 1.9931 -2.029642857 -0.5740375 -4.94845 2.345114286  
-0.99978 -0.9293 0.948529032 6.7610875

TCGA-CD-A4MG-01 -0.001378571 -1.4305 -2.511114286 1.64705 -4.8055875 2.214857143  
-1.54136 -0.917533333 1.117558065 6.6125375

TCGA-CD-A4MH-01 0.493614286 1.7229 -2.532385714 -0.1086375 -4.7029625  
1.938357143 0.16852 1.115693333 0.632809677 5.611625

TCGA-CD-A4MI-01 2.332792857 3.1685 1.675128571 2.6505875 -0.8134375 3.8351  
-0.03048 0.11636 1.749390323 7.9308

TCGA-CD-A4MJ-01 0.483142857 0.3796 0.0152 -2.0687375 -2.4764875 1.817371429  
-1.44688 -0.556926667 1.076290323 7.5392

TCGA-CG-4301-01 1.302671429 -0.4521 -1.246971429 -0.0809625 -3.290275  
3.929628571 0.69018 1.51532 2.504387097 6.9617875

TCGA-CG-4304-01 1.487485714 0.9716 -0.3262 1.4350625 -3.7529875 3.495014286  
-0.04816 2.325113333 1.680535484 6.7542125

TCGA-CG-4305-01 2.420957143 2.6325 1.958328571 1.2619375 -0.4551875  
4.159742857 0.80944 1.271246667 1.632864516 7.2834375

TCGA-CG-4306-01 1.5772 0.9789 0.654085714 1.2710625 -2.40935 2.871628571  
0.57736 1.82526 1.646503226 7.086175

TCGA-CG-4436-01 0.602028571 1.8524 -2.7237 -2.2898125 -3.813225 1.791342857  
-1.39902 2.16774 0.774396774 4.705925

TCGA-CG-4437-01 1.430328571 2.299 0.673014286 1.5321125 -3.33975 3.412128571  
-1.47514 1.361526667 1.426106452 7.30985

TCGA-CG-4438-01 2.115971429 2.0742 1.181185714 -0.658725 -1.80255 3.947442857  
-0.68764 0.7944 0.939480645 6.175275

TCGA-CG-4440-01 -0.208535714 1.7786 -1.1716 -1.527575 -2.0250125 3.304342857  
-1.02568 1.51458 1.096641935 6.093725

TCGA-CG-4441-01 0.755892857 0.6699 0.4367 -0.6711 -2.336075 3.487242857  
-1.7037 2.353373333 2.022690323 7.7299

TCGA-CG-4442-01 -0.009892857 -0.7346 0.070371429 -1.2715 -2.71745 1.979942857  
-2.41354 0.858146667 0.867696774 6.011475

TCGA-CG-4443-01 -0.553892857 -2.5479 -4.113514286 -4.563375 -5.1613125  
1.325171429 -3.61554 0.325193333 1.849254839 4.7079

TCGA-CG-4444-01 1.475578571 0.2762 0.319385714 1.8215 -1.848225 3.360871429  
0.1575 1.640086667 1.861796774 6.4995375

TCGA-CG-4449-01 1.494878571 0.4865 0.332985714 -0.3939375 -2.9491375  
3.989157143 0.91974 1.5724 3.134874194 7.8113

TCGA-CG-4460-01 0.930321429 2.8402 -0.3159 0.819875 -2.5215 2.6795 -0.68816  
0.8742 1.766229032 6.0245

TCGA-CG-4462-01 1.357257143 0.2998 0.321657143 -0.8014625 -2.874175  
4.855071429 0.91906 3.858426667 3.515729032 9.2372125

TCGA-CG-4465-01 0.865264286 -0.0574 0.295642857 -1.2127875 -2.2101375  
4.018928571 -0.21958 1.72844 1.435112903 6.8782875

TCGA-CG-4466-01 0.1883 -1.8314 -1.472357143 -1.9725 -3.134125 1.612785714  
-3.34764 1.298886667 0.970345161 4.481925

TCGA-CG-4469-01 0.6712 -1.1172 -1.2662 -2.6390125 -2.4223875 3.454028571  
-0.73706 1.637206667 1.226309677 5.2587625

TCGA-CG-4472-01 2.282107143 1.8879 0.078714286 1.6737 -2.64855 4.135985714  
1.74236 0.85366 2.117825806 7.7283875

TCGA-CG-4474-01 2.255771429 1.4441 0.179771429 1.126075 -3.387625 3.977985714  
0.85798 1.11802 1.473545161 7.0612625

TCGA-CG-4475-01 0.43785 -1.2828 -2.488542857 -1.7524125 -4.4652375 3.1616  
-0.83932 2.378273333 3.112296774 7.9615125

TCGA-CG-4476-01 2.229028571 2.1147 -0.071628571 2.2442375 -3.9667375  
3.855285714 2.05198 2.13516 2.467174194 7.4990125

TCGA-CG-4477-01 3.117178571 2.2391 1.646585714 1.8084875 -0.9453875  
3.866657143 1.31432 2.224486667 2.095164516 6.3143

TCGA-CG-5716-01 1.610842857 0.8961 -1.132642857 3.3768125 -3.6255625  
1.874142857 -0.01984 1.17216 1.378093548 5.3160625

TCGA-CG-5717-01 2.42365 1.9601 0.246814286 2.6858875 -2.414325 2.883085714  
1.58972 2.01952 2.449483871 6.0525375

TCGA-CG-5718-01 1.280692857 1.1641 -2.271885714 -0.4357 -2.557025 2.757885714  
-1.11732 1.903873333 1.669893548 6.17835

TCGA-CG-5719-01 0.886771429 0.2277 -2.656157143 -1.0292875 -2.391575  
2.747085714 -0.08516 1.49516 2.876874194 8.5771125

TCGA-CG-5720-01 1.344135714 1.4065 -2.372528571 0.8816125 -2.09685 2.911042857  
-0.45388 1.882353333 2.228616129 6.951475

TCGA-CG-5720-11 1.647964286 1.3956 -0.359342857 3.3528125 -2.9238625  
2.071171429 -1.56558 0.723226667 0.905664516 5.5342875

TCGA-CG-5721-01 2.851792857 3.74 2.451742857 1.4407625 -0.6268875 3.976871429  
1.25106 0.50752 1.042058065 6.7274875

TCGA-CG-5722-01 3.002164286 3.7006 1.996714286 3.154475 0.121725 3.026542857  
1.39546 0.1248 2.04503871 6.1257125

TCGA-CG-5722-11 1.309707143 2.4571 0.221957143 1.4297125 -3.9781625  
2.254542857 0.80116 1.704773333 1.738354839 6.6576

TCGA-CG-5723-01 1.528071429 3.1278 0.798485714 0.0213625 -1.8651875  
3.000914286 0.52176 1.020426667 0.907922581 6.2321

TCGA-CG-5724-01 0.144571429 0.7579 -2.678942857 -1.014825 -3.108975  
2.326314286 -1.7138 0.927366667 0.76583871 6.969075

TCGA-CG-5725-01 0.196514286 7.1109 -2.141371429 -1.623475 -5.744275  
0.695742857 -2.8697 -0.6383 1.313432258 5.5678125

TCGA-CG-5726-01 -0.6948 -0.4921 -3.886471429 -1.7874125 -5.9078625 1.044142857  
-0.60642 0.14742 0.308090323 4.90215

TCGA-CG-5728-11 2.419728571 2.328 0.087657143 4.31895 -5.1851625 2.100571429  
0.15628 0.569573333 0.390864516 4.9967625

TCGA-CG-5730-11 0.3003 1.334 -1.804014286 0.763725 -4.8885 0.923971429  
-0.11748 0.160066667 0.335906452 6.1497125

TCGA-CG-5732-01 1.662114286 2.3423 -1.028214286 3.0586 -2.0210875 2.643642857  
0.14796 2.186786667 1.313441935 5.151

TCGA-CG-5733-11 1.505728571 2.2113 -0.190071429 3.005175 -4.0412875 1.574771429  
-0.36992 -0.033326667 0.920151613 5.3389875

TCGA-CG-5734-01 1.765921429 1.1316 0.327071429 1.712525 -1.080425 3.009128571  
0.8024 1.328633333 1.515332258 5.54435

TCGA-CG-5734-11 0.357707143 0.2277 -0.5521 -0.7055375 -3.466925 1.167114286  
-1.4752 0.518573333 0.606103226 5.03945

TCGA-D7-5577-01 2.094764286 3.5224 0.238628571 -0.754675 -1.73925 3.945057143  
-0.49492 0.20306 0.714251613 6.10965

TCGA-D7-5578-01 1.488278571 1.3283 -1.021285714 2.1627125 -2.0646875  
2.857585714 0.17814 0.906646667 2.331816129 7.221025

TCGA-D7-6518-01 0.56575 0.6145 -1.356128571 1.080575 -2.002575 2.478128571  
-0.07826 0.388606667 3.0888 8.477975

TCGA-D7-6519-01 0.290642857 1.7185 0.0599 -2.314375 -1.7421 1.565714286  
-0.3645 -0.226773333 0.982480645 6.7264625

TCGA-D7-6520-01 0.32225 -0.5756 -2.468642857 -1.3027625 -3.830525 3.316171429  
-1.09986 0.391573333 1.717216129 7.859975

TCGA-D7-6521-01 1.6727 2.6138 -0.122014286 3.0213125 -3.6582 3.506071429  
-0.09444 0.790353333 2.367022581 7.5638875

TCGA-D7-6522-01 2.931478571 3.5035 0.797185714 4.5777875 -1.7416625  
4.281814286 2.23852 0.75544 2.726532258 8.5590625

TCGA-D7-6524-01 1.101121429 0.2522 -0.9954 0.5040125 -4.3089 3.742828571  
1.23346 2.847266667 3.453887097 8.998075

TCGA-D7-6525-01 0.3057 0.1648 -0.251071429 -1.6968 -2.414525 3.187742857  
-2.8108 1.165893333 1.132622581 7.847575

TCGA-D7-6526-01 -0.204678571 -0.1504 -3.231642857 -0.1641 -4.7659 2.112928571  
-1.05874 1.661986667 1.283080645 6.2582625

TCGA-D7-6527-01 0.249285714 0.0014 -1.448085714 -0.3957625 -4.71475 1.7174  
-0.36648 1.27578 1.691245161 6.5479625

TCGA-D7-6528-01 -0.224242857 -1.8836 -1.715642857 -2.1481 -2.8557625 0.672028571  
-4.07424 0.832126667 0.742406452 6.1087875

TCGA-D7-6815-01 0.415621429 1.8879 -1.9897 0.3458375 -4.5896375 2.495028571  
-0.38872 1.294006667 1.33583871 7.030875

TCGA-D7-6817-01 1.529042857 1.1706 -0.458742857 3.4656375 -2.2069375  
2.987014286 0.58672 1.83604 1.954729032 6.3080375

TCGA-D7-6818-01 0.106428571 -1.1172 -2.010257143 0.8699125 -3.94775 3.726128571  
0.76778 2.306486667 2.603164516 8.4975625

TCGA-D7-6820-01 0.977528571 -2.5479 -3.567142857 -2.0275625 -4.4524125  
2.053514286 -1.34626 1.87512 1.7273 5.3599

TCGA-D7-6822-01 0.987985714 5.784 0.1537 -1.545225 -2.480375 2.7388  
0.19502 2.42178 1.870309677 6.845425

TCGA-D7-8570-01 2.473357143 1.9968 1.509757143 1.327475 -0.3775625 4.423157143  
2.05542 0.01984 1.393635484 7.1658375

TCGA-D7-8572-01 1.957107143 3.2096 0.946114286 1.5148125 -2.1235875  
3.852742857 0.40576 2.534266667 2.527616129 8.3871625

TCGA-D7-8573-01 0.141185714 -0.6873 -1.776628571 -0.031825 -3.54405 1.669542857  
-1.2321 0.68512 0.628812903 5.3238125

TCGA-D7-8574-01 3.343371429 2.9784 -0.228771429 5.7575875 -2.683525  
3.498928571 0.78288 0.488706667 2.213867742 8.0153375

TCGA-D7-8575-01 1.435792857 0.4967 -0.2956 1.648425 -3.05015 4.033971429 0.7936  
1.73054 1.430958065 5.9054

TCGA-D7-8576-01 0.195742857 -0.3383 -3.243314286 0.1145625 -5.14555 3.579771429  
0.0847 1.215386667 2.227664516 6.7719625

TCGA-D7-8578-01 1.068842857 2.296 -0.470385714 1.249 -4.2067125 2.805642857  
-0.65106 1.114973333 2.097758065 8.95075

TCGA-D7-8579-01 1.331857143 0.8488 -0.368671429 2.26555 -2.3818375 3.399228571  
1.0681 2.263253333 2.800683871 8.217

TCGA-D7-A4YT-01 1.443435714 -0.8599 -1.323485714 -1.2670375 -4.4613375  
2.346957143 -1.11238 0.672953333 1.663380645 6.5441875

TCGA-D7-A4YU-01 3.015571429 2.3843 1.7631 4.1375625 -2.4128625 4.081071429  
0.69554 0.882513333 2.145806452 6.967725

TCGA-D7-A4YV-01 2.688707143 4.0497 2.080385714 2.4613375 -0.0488 4.046242857  
0.78256 0.43 2.253216129 7.370625

TCGA-D7-A4YX-01 1.795342857 2.5634 1.316342857 -1.742725 -1.49855 3.582057143  
-1.36722 0.66262 0.729919355 5.4288125

TCGA-D7-A4YY-01 0.8921 1.4174 -0.977457143 -2.4078625 -4.314725 3.348671429  
-2.7404 -0.27292 0.622441935 6.7202875

TCGA-D7-A4Z0-01 1.62195 0.2029 -0.179557143 3.433225 -3.85565 2.950128571 0.96076  
1.546353333 2.754293548 7.189825

TCGA-D7-A6EV-01 0.160335714 0.1388 -2.807371429 -0.3796375 -4.086075 1.8731  
-2.63848 0.758326667 0.768390323 5.9473375

TCGA-D7-A6EX-01 0.673935714 -0.1504 -1.416114286 0.9260875 -4.986125  
0.660557143 -0.31998 -1.739046667 0.272609677 6.4029

TCGA-D7-A6EY-01 2.479021429 3.0498 1.126971429 4.566075 -0.884425 3.4841  
1.24408 1.913086667 1.662890323 6.99625

TCGA-D7-A6EZ-01 1.902564286 2.5634 1.559128571 -1.5673875 -1.813525  
3.727842857 -1.24112 0.121306667 1.391480645 6.759525

TCGA-D7-A6F0-01 1.94385 3.4674 0.160871429 0.399075 -1.4246 3.321385714  
-0.11936 0.289833333 1.493719355 6.0166625

TCGA-D7-A6F2-01 1.507178571 2.0638 -0.526657143 -0.22745 -3.49205 2.671371429  
0.26946 0.80652 1.451174194 5.9669875

TCGA-D7-A747-01 2.146135714 1.884 0.043942857 3.9663125 -1.8365875  
2.437257143 0.56218 0.270766667 1.50233871 8.5425375

TCGA-D7-A748-01 1.037428571 0.0718 -1.363542857 0.3766125 -4.4851375  
4.360128571 1.54332 2.224413333 1.924806452 7.9231

TCGA-D7-A74A-01 0.306757143 0.1124 -1.285228571 -1.4913125 -4.4755 1.198142857  
-0.24774 -1.647473333 -0.610829032 4.0228875

TCGA-EQ-8122-01 -0.4294 0.5069 -3.143542857 -1.5364875 -3.392425 2.908071429  
-3.05968 1.544213333 2.705732258 7.4413875

TCGA-EQ-A4SO-01 0.123992857 -1.5105 -1.546728571 -0.547875 -3.0072 1.115871429  
-3.47886 0.389826667 1.033445161 4.3956

TCGA-F1-6177-01 0.675514286 0.0014 -0.751514286 -3.9894125 -2.3984875  
1.859014286 -2.21484 -0.124006667 0.891606452 6.2058875

TCGA-F1-6874-01 1.612342857 1.412 1.737642857 -0.8706125 -0.8249875  
3.614328571 -1.28524 3.095493333 2.828341935 7.66695

TCGA-F1-6875-01 -0.695421429 4.4556 -2.887014286 -4.0011125 -5.89695 0.926914286  
-5.33284 -0.43962 1.669425806 5.704

TCGA-F1-A448-01 1.4979 0.1903 0.5082 3.08075 -2.2909125 3.397385714 0.57016  
1.736333333 2.580764516 7.2135125

TCGA-F1-A72C-01 1.2793 1.2756 0.212885714 1.66125 -2.9915625 2.423057143  
-1.40684 0.429893333 1.788732258 7.269175

TCGA-FP-7735-01 1.027442857 1.2516 -1.236514286 1.2308625 -1.64365 2.084542857  
-1.1773 -0.286113333 2.188632258 6.5090625

TCGA-FP-7735-11 -0.814928571 0.0854 -0.6413 -3.091425 -3.090625 0.285  
-1.568 -1.354966667 1.722912903 7.91905

TCGA-FP-7829-01 -0.547521429 -2.3884 -4.350942857 0.6248 -6.3128625 2.870642857  
0.08958 1.00364 2.053035484 7.6724375

TCGA-FP-7829-11 -1.264064286 -2.1779 -2.311085714 -5.2945375 -5.1137 1.633214286  
-0.3648 0.557406667 2.622909677 9.1294

TCGA-FP-7916-01 2.636728571 3.1426 1.251385714 2.7139 -0.8876875 4.281357143  
0.28148 0.2495 2.404858065 7.11855

TCGA-FP-7998-01 3.308085714 5.1643 2.304557143 2.6960375 -0.4353625  
5.114228571 0.71024 -0.049293333 2.395951613 7.5814875

TCGA-FP-8099-01 0.516464286 -2.114 -1.424385714 0.078325 -3.242375 3.1829  
-1.40814 1.696026667 1.343277419 7.2246375

TCGA-FP-8209-01 3.602264286 3.5212 1.713371429 5.534425 -1.5967 3.792714286  
2.94676 1.874606667 3.355529032 9.029475

TCGA-FP-8210-01 3.342878571 3.3032 1.342457143 5.14225 -1.0208 3.922414286  
2.28948 1.87268 3.182058065 8.720225

TCGA-FP-8211-01 1.395314286 1.683 -1.215971429 0.0245875 -3.90115 1.975885714  
-0.76748 -0.0202 1.208703226 5.3052125

TCGA-FP-8631-01 0.172628571 -1.2142 -2.7034 -0.3421875 -4.395175 2.225571429  
-2.2492 1.30556 1.994051613 7.3435125

TCGA-FP-A4BE-01 2.262035714 1.9786 1.153442857 -0.5377625 -0.3922875  
3.458714286 0.2804 -0.17594 0.848209677 5.9395875

TCGA-FP-A4BF-01 2.516357143 3.0428 2.486357143 1.0439625 0.1095625  
3.691257143 -0.10542 0.152526667 1.34116129 7.610825

TCGA-FP-A8CX-01 1.321735714 0.6332 -1.995085714 0.698425 -3.944175 2.299114286  
-0.11434 0.826246667 1.137448387 5.768525

TCGA-FP-A9TM-01 2.063042857 0.6332 -0.583942857 5.8203125 -3.8077125  
2.436342857 -0.0884 0.915273333 1.387829032 5.01295

TCGA-HF-7131-01 1.5973 1.2756 0.218657143 -0.2010375 -1.8924125 3.437671429  
-0.7541 2.2718 2.742890323 6.560925

TCGA-HF-7132-01 2.828714286 2.3019 1.4596 3.4693 -1.0609875 3.701785714  
1.18324 1.3419 2.327403226 7.289025

TCGA-HF-7133-01 1.98555 2.3953 0.169514286 1.363525 -3.101025 4.091614286  
1.20326 1.516226667 2.231258065 6.7893

TCGA-HF-7134-01 0.671464286 0.1519 -1.796157143 0.3009625 -2.0124 2.673414286  
-1.22714 1.57452 2.929916129 6.0934375

TCGA-HF-7136-01 1.0411 2.0535 -3.141857143 -0.5253 -4.7775625 2.585985714  
-1.34852 1.50406 2.38886129 7.8125625

TCGA-HF-A5NB-01 0.9193 0.9716 -0.457971429 -2.2854 -3.0732125 1.611085714  
-3.04282 -1.03354 0.313677419 5.19735

TCGA-HJ-7597-01 1.747142857 2.7161 1.521328571 2.1262 -0.4715875 2.037128571  
-1.49578 1.30408 1.096364516 6.0267625

TCGA-HU-8238-01 0.674014286 0.346 -1.277971429 1.3012625 -3.2835625 2.2721  
-1.41576 0.661286667 1.32886129 5.5698

TCGA-HU-8238-11 0.443992857 2.2113 -1.222442857 0.381725 -4.2323625 1.230242857  
-1.9842 0.46806 0.466193548 4.58355

TCGA-HU-8243-01 0.578364286 -1.9379 -1.585985714 0.4663 -3.127375 2.219942857  
-0.85752 1.363773333 1.948858065 5.8410125

TCGA-HU-8244-01 -0.418428571 -0.8339 -2.310957143 -2.1895 -3.6370625 0.346285714  
-2.81604 -0.70664 0.119767742 2.800575

TCGA-HU-8249-01 1.6231 1.5854 -0.2185 -0.1471 -3.15445 1.4398 -1.4836  
0.305333333 1.351877419 5.5006375

TCGA-HU-8602-01 2.080242857 0.7916 1.001828571 -1.2537625 -1.2023375 4.3164  
-1.64616 1.616926667 1.459596774 6.845275

TCGA-HU-8604-01 2.172707143 2.4623 1.799742857 0.713025 -0.4673875 3.250757143  
-1.33408 1.00348 1.857096774 7.0982

TCGA-HU-8608-01 3.3196 3.7783 2.680857143 2.3547 -0.72415 5.146357143 -0.068  
1.699653333 2.316412903 6.3352625

TCGA-HU-8610-01 2.6704 -1.2828 0.597357143 0.083075 -1.983325 4.036057143  
0.51336 1.29232 2.893612903 7.2173875

TCGA-HU-A4G2-01 0.503657143 1.7403 0.2582 -2.20645 -1.9810125 2.175942857  
-0.4071 -0.24552 2.523951613 5.2321125

TCGA-HU-A4G3-01 -0.614214286 -0.8863 -1.444314286 -0.186225 -3.257275  
1.455214286 -1.93884 0.617253333 1.480441935 5.5874875

TCGA-HU-A4G3-11 -1.8096 -1.3183 -1.614514286 -4.589575 -4.6321875 0.720457143  
-1.89514 0.08014 1.665825806 7.9599875

TCGA-HU-A4G6-01 -0.308928571 -0.9406 -2.805171429 -2.6811125 -3.702975  
1.090514286 -2.32822 -0.885766667 0.391067742 2.9809

TCGA-HU-A4G8-01 1.64565 0.8568 0.665685714 3.3424875 -1.9334625 2.771271429  
-1.07508 0.50554 1.503535484 5.8735875

TCGA-HU-A4G9-01 -1.401642857 -2.8262 -3.378828571 -1.9642125 -5.8220125  
0.513557143 -4.8958 -0.089993333 -0.017687097 3.1476

TCGA-HU-A4GC-01 0.333235714 1.2636 -0.698385714 -0.813875 -2.7440625  
2.086228571 -0.82674 0.44506 1.626612903 5.7553625

TCGA-HU-A4GC-11 -1.046342857 -0.7834 -2.102057143 -4.694225 -5.0698875  
0.640157143 -1.127 -0.477973333 1.227551613 7.4261625

TCGA-HU-A4GD-01 0.441828571 1.6234 -2.768171429 0.4738125 -1.4574375 1.156  
-1.1998 0.83906 0.580164516 3.8793125

TCGA-HU-A4GF-01 1.1344 2.4649 -1.364757143 -0.7312 -2.5509875 2.6182  
-0.68426 2.35618 2.194325806 5.2711125

TCGA-HU-A4GH-01 0.153942857 0.1648 -1.045 0.2516625 -3.0019375 1.562457143  
-0.98072 1.508373333 0.6357 3.5959875

TCGA-HU-A4GH-11 -0.875414286 -0.6416 -1.635442857 -2.299025 -2.9937875  
0.707871429 -2.52706 1.286086667 2.42736129 8.4313125

TCGA-HU-A4GJ-01 3.863321429 3.4304 1.1391 6.9154375 -2.589975 3.060914286  
0.94276 0.469386667 1.881767742 5.73495

TCGA-HU-A4GN-01 0.571957143 1.0642 0.411342857 -0.2698375 -2.87365 1.913971429  
-2.42306 -0.184766667 0.951167742 5.81115

TCGA-HU-A4GN-11 -0.456992857 -1.9942 -2.6181 -2.1122625 -2.8181875 1.388242857  
-1.9378 1.08292 0.981280645 7.699275

TCGA-HU-A4GP-01 -0.239692857 0.3685 -2.836571429 1.015075 -4.874825 1.251157143  
-1.06144 -0.479186667 2.045164516 5.5500375

TCGA-HU-A4GP-11 -0.188914286 0.3907 -1.140971429 -4.4274 -5.584725 1.273728571  
-1.2795 -0.87716 1.877048387 7.7335125

TCGA-HU-A4GQ-01 0.40275 0.7233 -1.636371429 -2.3072375 -2.9922125 2.223  
-1.8575 -0.527106667 0.932712903 7.039375

TCGA-HU-A4GT-01 0.225042857 0.7493 -1.921885714 -0.98905 -4.5508125 1.547257143  
-1.26832 0.525686667 0.694848387 5.25495

TCGA-HU-A4GU-01 0.428528571 -0.5332 -1.117942857 -4.3367375 -4.9479375  
1.259671429 -4.0455 0.26372 0.368167742 6.1238625

TCGA-HU-A4GX-01 1.73785 3.4156 1.150271429 0.3126 -1.5311375 1.968042857  
-2.22616 -0.51302 0.5731 4.94025

TCGA-HU-A4GY-01 3.590157143 2.4465 1.628785714 5.4045125 -2.089175 4.4791  
2.13978 0.072746667 2.463348387 7.632675

TCGA-HU-A4GY-11 -0.189592857 -0.4719 -1.805285714 -1.8735875 -4.5100125  
0.853028571 -1.51438 -0.00846 2.491748387 8.136875

TCGA-HU-A4H0-01 2.26255 2.6208 1.324785714 -0.8429 -2.71675 3.662685714  
-0.71702 -0.124186667 1.272977419 5.3022125

TCGA-HU-A4H2-01 0.707728571 0.8164 -0.732671429 1.40155 -2.954375 1.813542857  
-0.4415 -0.358086667 0.245690323 5.283025

TCGA-HU-A4H3-01 0.982857143 0.9419 0.168828571 -1.1174375 -1.879275  
1.320914286 -4.19448 0.130746667 0.534841935 6.07535

TCGA-HU-A4H4-01 2.164814286 2.3135 1.233357143 1.821425 -2.026 3.197185714  
-0.11168 0.369553333 1.660622581 5.88015

TCGA-HU-A4H5-01 0.5275 0.2762 -0.446057143 -0.4009 -2.053125 1.857185714  
-2.19718 1.202913333 1.583432258 5.0903

TCGA-HU-A4H6-01 0.870457143 0.6969 -1.070771429 3.3224 -2.5245875 1.7318  
-0.71326 1.03456 1.929374194 5.7838125

TCGA-HU-A4H8-01 0.007814286 0.0854 -0.641428571 -1.6231 -2.6313875 1.378485714  
-1.48366 -1.241713333 0.952448387 4.6799875

TCGA-HU-A4HB-01 2.900385714 2.6114 0.527971429 5.658475 -1.7270125 3.401314286  
1.27814 0.86798 1.696809677 5.6461875

TCGA-HU-A4HB-11 -0.99935 -0.9971 -1.9104 -4.85125 -5.361575 0.358171429  
-1.93314 -0.45028 1.740309677 7.9702875

TCGA-HU-A4HD-01 -0.038642857 2.7657 -2.294628571 -0.90595 -4.1853125 2.6364  
-1.40514 0.88584 1.563306452 6.348925

TCGA-IN-7806-01 0.520935714 -0.9406 -3.051614286 0.9978 -4.2077375 1.4434  
-0.75722 0.29316 1.846687097 5.83895

TCGA-IN-7806-11 -0.16025 0.7321 -1.843228571 -1.70395 -5.1711375 -0.856785714  
0.6439 0.178086667 0.676806452 4.1845625

TCGA-IN-7808-01 3.721135714 3.5779 0.960814286 5.781825 -0.94155 2.528871429  
1.299 -0.254706667 1.525483871 4.998925

TCGA-IN-8462-01 1.025778571 -0.394 -2.295271429 0.14165 -3.496575 1.738514286  
0.24722 0.973093333 1.688109677 6.713

TCGA-IN-8462-11 0.8613 -3.3076 -4.635771429 -1.3486 -2.699475 0.439885714  
0.9454 0.582626667 0.343887097 4.4572625

TCGA-IN-8663-01 -0.339392857 -1.4305 -3.432971429 -3.439325 -3.2387375  
2.469442857 -1.67206 -0.366186667 1.226445161 6.4187125

TCGA-IN-8663-11 -1.739078571 -9.9658 -6.099771429 -1.5591125 -7.3210875  
-1.087428571 0.40122 0.32784 -0.0546 3.848425

TCGA-IN-A6RI-01 -0.13515 -0.7108 -4.112814286 -2.6555125 -5.2857875 0.554542857  
-1.81738 1.18444 0.851393548 4.1159125

TCGA-IN-A6RJ-01 -0.098592857 -0.5543 -3.539085714 -1.004825 -4.282275  
0.466657143 -0.49258 -0.085493333 -0.222106452 3.5508

TCGA-IN-A6RL-01 0.9129 0.2154 -1.912671429 1.2312375 -4.3015125 2.010557143  
-0.83102 1.209766667 1.832664516 5.9716625

TCGA-IN-A6RO-01 0.621735714 -0.7834 -0.643285714 -1.994375 -2.2039125 1.2894  
-0.84782 -0.468486667 0.659254839 4.4733375

TCGA-IN-A6RR-01 0.235821429 0.3573 -0.673728571 -0.6656375 -2.4582125  
1.006528571 -1.42488 0.694773333 1.651912903 4.8854375

TCGA-IN-A6RS-01 1.403342857 1.5465 0.146157143 -0.99335 -5.039225 2.062442857  
-2.31892 1.028813333 1.557641935 5.416075

TCGA-IN-A7NR-01 1.861278571 1.7532 -2.576614286 2.1422 -5.153325 1.570871429  
-1.63692 -0.018886667 1.487974194 6.01725

TCGA-IN-A7NT-01 0.331378571 -1.7809 0.293757143 -3.541425 -4.8051875  
2.756328571 -6.13256 1.071586667 0.93726129 7.3655375

TCGA-IN-A7NU-01 1.436428571 0.8327 -1.5308 -0.6245875 -3.4076125 2.263942857  
0.27108 1.240413333 1.261032258 6.95845

TCGA-IN-AB1V-01 1.209628571 0.7664 -1.351928571 1.8704 -1.8475375 0.7003  
-0.90722 1.832446667 1.207970968 5.0266625

TCGA-IN-AB1V-11 1.082107143 0.7407 -1.100242857 -1.5979375 -3.64145 0.430614286  
0.80448 1.19222 1.484241935 6.060575

TCGA-IN-AB1X-01 3.255778571 3.5473 2.121257143 2.099775 -1.4503 3.234814286  
-0.50594 2.136113333 1.845906452 5.8251125

TCGA-IN-AB1X-11 -0.348135714 -2.9324 -3.413514286 -1.753175 -4.6524625  
-0.020342857 0.2565 0.95852 1.372516129 5.1152875

TCGA-IP-7968-01 2.067171429 2.5683 1.170485714 -0.2629125 -1.7054 2.962642857  
-1.83496 1.37938 3.010883871 7.81645

TCGA-IP-7968-11 0.28185 -0.4131 -2.830071429 -0.182325 -5.4879375 1.52  
-1.79924 1.57676 1.76343871 6.457925

TCGA-KB-A6F7-01 2.245342857 3.3911 1.319271429 0.6349 -1.528175 3.104557143  
0.60498 1.222286667 1.313954839 4.503175

TCGA-KB-A93G-01 0.98085 -1.1488 -1.333471429 0.2938125 -1.8129125 3.360128571  
0.13464 3.35128 3.706332258 10.1212

TCGA-KB-A93H-01 -0.206242857 5.0032 -4.231028571 -4.4812125 -7.4858875  
1.546257143 -2.66398 -0.465713333 0.229509677 3.598925

TCGA-KB-A93J-01 1.717207143 1.196 1.029771429 -0.4623125 0.11595 3.903685714  
0.33774 1.037586667 1.627412903 5.609725

TCGA-MX-A5UG-01 3.102164286 2.5188 1.048114286 5.34885 -1.3575875 3.997928571  
1.85452 2.1749 3.447474194 9.3280375

TCGA-MX-A5UJ-01 0.870192857 0.605 -1.500542857 2.3286125 -3.7930125  
2.024357143 -1.4997 0.875406667 2.48016129 7.687625

TCGA-MX-A663-01 0.940664286 1.5165 -1.0533 1.16885 -2.604725 2.549871429  
-0.86614 1.245026667 3.400387097 8.5890125

TCGA-MX-A666-01 1.574692857 3.5803 -1.091757143 4.7489875 -2.5096625  
2.261271429 -0.50512 1.904806667 2.3297 6.0094

TCGA-R5-A7O7-01 1.211478571 -0.3752 -3.1122 -0.2639125 -6.5120625 0.942228571  
-3.56824 0.165553333 1.777835484 5.683325

TCGA-R5-A7ZE-01 -0.900478571 1.816 -4.714 -3.3743875 -3.9374625 0.642014286  
-1.10422 1.802186667 1.232635484 4.554825

TCGA-R5-A7ZF-01 -0.380635714 -1.2142 -3.324371429 -3.836675 -4.986575  
-0.687271429 -5.04216 -0.202073333 0.740993548 4.715075

TCGA-R5-A7ZI-01 1.776735714 3.2526 0.862285714 0.8026375 -3.4500375  
2.508785714 -0.96176 -0.9794 0.172083871 4.0236125

TCGA-R5-A7ZR-01 0.051321429 2.2268 -3.551842857 -0.6915375 -5.0297 1.868228571  
-1.77148 0.106106667 0.493232258 3.58555

TCGA-R5-A805-01 1.510607143 0.8805 -0.501457143 -0.4765875 -2.5569125  
3.634342857 -1.6927 2.97834 2.320887097 6.885875

TCGA-RD-A7BS-01 1.893057143 0.9862 -1.410571429 3.3680875 -1.1753625  
2.330814286 -0.11216 1.6292 2.124006452 6.663575

TCGA-RD-A7BT-01 1.14255 0.8246 -1.898442857 -0.6971375 -4.35675 1.488228571  
-0.2306 1.211786667 0.822787097 4.6619875

TCGA-RD-A7BW-01 2.739278571 4.1644 2.243585714 0.0388375 -1.8301875 3.4404  
1.27866 0.59368 2.807377419 8.39535

TCGA-RD-A7C1-01 1.7078 2.7993 1.319414286 0.7065375 -0.3769875 3.249542857  
-0.45448 1.596853333 1.591209677 5.6302375

TCGA-RD-A8MV-01 2.232428571 2.0004 1.505128571 3.0689875 -0.8282875  
3.394114286 -0.4181 2.217873333 1.71756129 5.5693625

TCGA-RD-A8MW-01 1.427228571 2.8522 -1.436885714 0.5419875 -3.3668375  
3.361 0.3842 0.631533333 1.50513871 7.2827

TCGA-RD-A8N0-01 2.859821429 2.9338 1.532485714 5.0734 -1.2081 2.758628571  
0.9683 0.617386667 1.955412903 6.5862125

TCGA-RD-A8N1-01 3.214357143 2.8381 1.524114286 4.3065375 -0.1651875  
3.503371429 1.62808 1.162293333 2.176045161 7.0134

TCGA-RD-A8N2-01 1.057514286 1.4174 -0.2461 1.147225 -4.4926625 2.1698 0.82904  
-0.653973333 2.010174194 8.3275375

TCGA-RD-A8N4-01 1.897042857 2.004 -0.053214286 2.1340875 -2.3880125  
2.353657143 -0.55142 -0.114886667 2.099732258 7.9950125

TCGA-RD-A8N5-01 0.305921429 -1.1172 -0.815085714 -0.7018875 -3.4369625 3.1937  
-0.81806 2.583226667 2.671670968 8.1968625

TCGA-RD-A8N6-01 0.494707143 2.3843 -0.687628571 -1.4084375 -4.0162 2.2951  
-0.57656 0.943 1.739258065 7.2432

TCGA-RD-A8N9-01 1.798964286 1.9638 0.028585714 1.8115 -1.964275 3.2513  
0.85896 0.07876 3.175874194 8.4990375

TCGA-RD-A8NB-01 2.208307143 1.7403 1.221357143 3.1243875 0.1085375  
3.371214286 0.79076 1.653586667 2.473451613 7.6739

TCGA-SW-A7EA-01 0.006814286 1.5415 0.4349 -2.2585375 -3.73995 1.3279 -3.1837  
-0.613933333 -0.307041935 6.6991875

TCGA-SW-A7EB-01 2.101057143 2.5163 0.1409 2.7336125 -3.17185 1.379142857  
-0.27692 0.56466 1.496451613 5.6734125

TCGA-VQ-A8DT-01 -0.063714286 0.434 -1.124757143 -0.1903125 -4.9479 0.758771429  
-1.98528 0.33194 0.613441935 4.5594

TCGA-VQ-A8DU-01 0.729021429 2.0569 0.1077 0.429825 -3.2141625 1.930542857  
-0.10306 1.044286667 1.255612903 6.454425

TCGA-VQ-A8DV-01 -1.739285714 1.4704 -3.3049 -2.572925 -6.0583375 0.5662  
-5.53736 0.299493333 1.032954839 4.068825

TCGA-VQ-A8DZ-01 -0.02415 4.2766 -1.861657143 -1.31555 -3.3960875 2.565871429  
-0.58448 2.412026667 2.166422581 6.271275

TCGA-VQ-A8E0-01 0.744192857 -2.6349 -2.282628571 -1.861125 -4.2872125  
2.473771429 0.8575 1.76958 1.868712903 5.35005

TCGA-VQ-A8E2-01 2.033264286 3.6242 0.480557143 -0.3594375 -2.40925 2.638157143  
0.32924 0.768193333 2.688387097 8.0781875

TCGA-VQ-A8E3-01 1.76625 1.595 2.094528571 0.2360625 0.4057875 2.704714286  
-0.94648 1.133053333 1.800122581 5.8436125

TCGA-VQ-A8E7-01 -0.12665 1.125 -1.452742857 -1.7345375 -4.104775 1.088442857  
-4.5043 1.07742 1.8275 6.921

|                 |              |             |              |             |            |             |
|-----------------|--------------|-------------|--------------|-------------|------------|-------------|
| TCGA-VQ-A8P2-01 | -0.420228571 | -1.5951     | -3.030342857 | -4.5436125  | -3.4575625 |             |
|                 | 0.455028571  | -3.89332    | -1.093886667 | 0.726903226 | 5.023025   |             |
| TCGA-VQ-A8P3-01 | 0.511957143  | 1.0711      | 0.391642857  | -2.7886125  | -2.429275  |             |
|                 | 0.783428571  | -2.96352    | 0.007106667  | 1.470458065 | 6.775675   |             |
| TCGA-VQ-A8P5-01 | 0.835857143  | 0.6332      | -0.709471429 | -0.3221375  | -1.0203625 |             |
|                 | 2.782257143  | -1.13732    | 1.065586667  | 1.714812903 | 7.409325   |             |
| TCGA-VQ-A8P8-01 | 1.459942857  | 0.7146      | -0.946428571 | 4.4625125   | -2.7992625 |             |
|                 | 2.073771429  | 0.02906     | -0.0772      | 2.575909677 | 7.03965    |             |
| TCGA-VQ-A8PB-01 | 0.53615      | 1.0151      | 0.480728571  | -1.5659375  | -2.751575  | 1.692371429 |
|                 | -2.24026     | -0.11704    | 1.593509677  | 6.7461875   |            |             |
| TCGA-VQ-A8PC-01 | 1.727621429  | 0.9343      | -0.0638      | 3.4966375   | -1.8596625 | 4.012528571 |
|                 | 0.02978      | 2.112186667 | 2.706903226  | 6.8297375   |            |             |
| TCGA-VQ-A8PD-01 | 3.062521429  | 2.6043      | 1.822785714  | 4.6963625   | -1.432475  |             |
|                 | 3.619857143  | 1.0393      | 2.108106667  | 3.087951613 | 7.761625   |             |
| TCGA-VQ-A8PE-01 | 1.947371429  | 3.3003      | -0.118828571 | 3.06045     | -1.84885   | 3.044157143 |
|                 | 0.18454      | 1.578006667 | 1.636041935  | 6.22935     |            |             |
| TCGA-VQ-A8PF-01 | 2.857521429  | 3.728       | 2.266942857  | 2.552475    | -1.1191125 | 4.590357143 |
|                 | 1.9845       | 1.20194     | 2.930177419  | 6.814825    |            |             |
| TCGA-VQ-A8PH-01 | 1.677278571  | 3.5911      | -0.548014286 | 1.4471      | -4.08145   | 1.418871429 |
|                 | -0.10474     | 0.029646667 | 0.741241935  | 5.0331125   |            |             |
| TCGA-VQ-A8PJ-01 | -0.035364286 | 3.6312      | -2.3434      | -0.738775   | -3.3234875 | 2.001728571 |
|                 | -1.6819      | 1.52684     | 1.998554839  | 5.70115     |            |             |
| TCGA-VQ-A8PK-01 | 0.770507143  | 2.9893      | -0.008742857 | -1.147775   | -0.726675  |             |
|                 | 2.388757143  | -4.0958     | 1.214806667  | 1.557564516 | 7.6055875  |             |
| TCGA-VQ-A8PM-01 | 1.804428571  | 1.3735      | 0.382314286  | 3.5274125   | -1.8082625 |             |
|                 | 2.794271429  | 0.27664     | 1.160866667  | 2.626496774 | 6.7798625  |             |
| TCGA-VQ-A8PO-01 | 2.267242857  | 2.5388      | 0.988557143  | 3.5189625   | -1.7616625 |             |
|                 | 2.820542857  | -0.61002    | -0.050233333 | 1.326622581 | 6.8689     |             |
| TCGA-VQ-A8PP-01 | 1.733921429  | 2.108       | 1.364385714  | 2.5629      | -2.4264625 | 2.871128571 |
|                 | -1.1759      | 0.31364     | 1.595054839  | 7.8372125   |            |             |
| TCGA-VQ-A8PQ-01 | 4.594514286  | 3.9865      | 1.316057143  | 6.3762875   | -0.76735   | 3.8695      |
|                 | 1.94526      | 1.41452     | 2.791451613  | 7.245875    |            |             |
| TCGA-VQ-A8PU-01 | -1.511407143 | -2.6349     | -2.1174      | -2.209825   | -5.2066625 | 1.078814286 |
|                 | -2.3627      | 1.4186      | 1.246751613  | 5.3049875   |            |             |
| TCGA-VQ-A8PX-01 | 1.695942857  | 1.5415      | -0.5023      | 0.6528125   | -4.5153    | 1.754671429 |
|                 | -0.22452     | 1.89694     | 1.411180645  | 3.5721375   |            |             |
| TCGA-VQ-A91A-01 | 0.214792857  | -1.5951     | -0.555985714 | -0.3592875  | -2.5842375 | 3.7933      |
|                 | -0.5603      | 1.76916     | 3.018616129  | 8.7553875   |            |             |
| TCGA-VQ-A91D-01 | 0.5466       | -0.2498     | -0.127185714 | -2.5425125  | -1.4007625 | 2.547157143 |
|                 | -5.32888     | 0.35228     | 0.760716129  | 7.03575     |            |             |
| TCGA-VQ-A91E-01 | 1.90765      | 2.0254      | 1.117842857  | 2.750175    | -1.8760125 | 2.0748      |
|                 | -1.43314     | 1.252386667 | 1.101445161  | 5.15885     |            |             |
| TCGA-VQ-A91K-01 | 1.508207143  | 1.334       | -0.0932      | -1.08635    | -3.7749375 | 3.5797      |
|                 | -0.41084     | 0.377866667 | 1.379896774  | 7.2572875   |            |             |

TCGA-VQ-A91N-01 0.911914286 0.688 0.321871429 1.533875 -1.9922875 1.515114286  
-0.48542 1.239773333 1.678416129 5.73795

TCGA-VQ-A91Q-01 0.608407143 -1.6394 -0.417642857 -0.8226875 -3.9781875  
2.110571429 -1.66616 1.781946667 3.256029032 8.0251

TCGA-VQ-A91S-01 1.86115 4.3162 1.2577 -1.2194 -1.0969375 2.448 -1.53648  
1.66914 1.981816129 5.884725

TCGA-VQ-A91U-01 1.865207143 2.0147 -0.094542857 0.888425 -2.7756875 2.455642857  
-0.0838 0.236993333 1.875612903 5.7023125

TCGA-VQ-A91V-01 -0.137007143 -0.3383 -1.061014286 -0.9088875 -3.7032625  
1.230414286 -2.02524 1.210373333 1.288519355 4.7800375

TCGA-VQ-A91W-01 2.004085714 -0.394 -1.092457143 0.504625 -4.061275 2.976085714  
0.50782 0.75784 1.782206452 5.4135625

TCGA-VQ-A91X-01 -0.772042857 -2.2447 -4.456842857 -0.5717 -6.4523 -0.2917  
-2.46186 -0.325586667 -1.099632258 3.38775

TCGA-VQ-A91Y-01 2.453564286 1.8242 0.917642857 1.722225 -1.330525 4.161271429  
0.40154 0.200413333 2.438664516 8.463

TCGA-VQ-A91Z-01 -0.737721429 3.2405 -4.132114286 -2.12405 -6.8560125 0.178371429  
-3.90432 0.640226667 0.298609677 4.8321875

TCGA-VQ-A922-01 0.683521429 1.4547 -3.894885714 1.3608625 -2.32655 2.374757143  
-0.90788 1.094906667 3.184780645 8.345575

TCGA-VQ-A923-01 3.195671429 3.9617 1.952214286 3.39485 -1.9339375 3.724128571  
1.46354 0.569933333 2.574416129 6.2655875

TCGA-VQ-A924-01 1.682078571 1.7316 0.849985714 -0.1264875 -1.3099875  
3.158385714 -0.19282 0.1703 1.107451613 7.1224125

TCGA-VQ-A925-01 1.072035714 1.2815 -0.2976 0.2766375 -3.4281375 1.654828571  
-1.30908 0.829453333 2.059751613 6.1864

TCGA-VQ-A927-01 1.1222 0.24 -0.354371429 0.45565 -1.6567625 1.761142857  
-0.85298 1.398373333 2.627970968 6.8181375

TCGA-VQ-A928-01 0.385271429 -1.2828 -0.956114286 -0.2111375 -3.6966375  
2.118528571 -1.30688 1.248966667 2.469980645 7.8469625

TCGA-VQ-A92D-01 -0.357135714 -0.9971 -2.676057143 -2.283575 -3.582325  
1.229585714 -3.14248 -0.75532 1.599496774 6.8086

TCGA-VQ-A94O-01 2.063957143 1.0642 -0.050014286 -0.270775 -4.4466875  
2.719142857 -0.99482 1.114873333 2.037412903 6.1029625

TCGA-VQ-A94P-01 1.590857143 1.9895 0.664428571 1.1844 -1.358075 2.514085714  
-0.23624 0.524913333 3.224135484 9.0409

TCGA-VQ-A94R-01 1.5592 1.6093 -0.168271429 1.41225 -2.1885 2.901028571  
-0.41066 0.03058 2.319983871 7.5632875

TCGA-VQ-A94T-01 -1.246735714 -2.3884 -0.501614286 -1.8955125 -2.065575 1.6467  
-4.09588 0.957373333 1.907974194 6.1792

TCGA-VQ-A94U-01 0.11595 -0.6643 -2.4339 -0.7853875 -2.6981625 1.438814286  
-2.73076 0.526573333 2.980403226 7.6409

TCGA-VQ-AA64-01 0.683728571 1.2992 -1.564942857 1.510925 -2.57265 2.210828571  
-2.26782 0.99776 2.707629032 8.759

TCGA-VQ-AA68-01 1.66415 1.6187 -0.191614286 2.8425625 -2.638025 1.941014286  
-0.14668 0.8182 1.15333871 5.885875

TCGA-VQ-AA69-01 1.391378571 1.6785 0.844657143 -3.2589875 -2.394175  
2.454228571 -1.32214 0.150606667 0.92473871 4.6840625

TCGA-VQ-AA6A-01 0.426671429 -0.8863 -2.99 -0.9467375 -3.0803875 1.834857143  
-0.46066 0.483906667 1.384503226 5.88845

TCGA-VQ-AA6B-01 0.165085714 -1.8836 -4.629128571 -1.8290125 -7.0756375  
0.366614286 -1.92194 0.042293333 1.108270968 6.086175

TCGA-VQ-AA6D-01 0.247728571 3.2389 -3.158942857 -1.1152625 -4.458225  
2.119885714 -3.87842 1.364873333 0.889032258 5.33495

TCGA-VQ-AA6F-01 1.511442857 1.0293 -0.403585714 3.6143375 -1.6277125  
2.260557143 -1.49514 1.061806667 2.003006452 5.7074125

TCGA-VQ-AA6G-01 0.195685714 -1.5105 -1.343428571 -0.3948375 -3.7091375  
2.146971429 -1.07598 0.94078 2.21396129 5.7863

TCGA-VQ-AA6I-01 1.606485714 1.0079 -0.841357143 1.0664875 -2.6368125  
2.519128571 0.60732 0.30182 1.6559 5.9522125

TCGA-VQ-AA6J-01 2.274478571 2.7972 -0.199957143 3.879325 -2.3867875 4.103885714  
1.37262 0.711026667 1.805793548 6.720125

TCGA-VQ-AA6K-01 1.460242857 2.3222 1.1586 -0.4734625 -1.6847 2.180585714  
-0.70426 0.641913333 2.00223871 7.10175

TCGA-ZA-A8F6-01 1.07085 0.3115 -0.5774 -0.452675 -2.91875 3.567257143 0.52016  
0.676586667 2.282703226 7.6996625

TCGA-ZQ-A9CR-01 0.985007143 1.4335 -0.0644 -1.5540875 -2.3772125 2.231485714  
-0.9727 1.09782 2.617729032 7.9310375

| sample                   | B cells   |         | CD4 Naive |       | CD4 Memory |           | CD8 Naive |       | CD8 Memory |       | CD8   |        | Effector |
|--------------------------|-----------|---------|-----------|-------|------------|-----------|-----------|-------|------------|-------|-------|--------|----------|
|                          | Treg cell | Th cell | Monocytes |       | CD16       | Monocytes |           | CD14  | DC         | pDC   | NK    | Plasma |          |
| TCGA-HU-A4GD-01<br>0     | 0.006     | 0       | 0         | 0     | 0.025      | 0.22      | 0         | 0.29  | 0.103      | 0     | 0     | 0.073  | 0.283    |
| TCGA-HU-8244-01<br>0.027 | 0.338     | 0       | 0         | 0     | 0.133      | 0.004     | 0.254     | 0.171 | 0.004      | 0     |       |        |          |
| TCGA-VQ-A91X-01<br>0.27  | 0.006     | 0       | 0         | 0     | 0.133      | 0.139     | 0         | 0.174 | 0.249      | 0     | 0     | 0.029  |          |
| TCGA-BR-A4QL-01<br>0.228 | 0.007     | 0       | 0.024     | 0.01  | 0          | 0         | 0.385     | 0.225 | 0          | 0     | 0.118 |        |          |
| TCGA-BR-6710-01<br>0.344 | 0.005     | 0       | 0         | 0     | 0.062      | 0         | 0.237     | 0.188 | 0          | 0     | 0.124 |        |          |
| TCGA-VQ-A8DT-01<br>0     | 0.006     | 0       | 0         | 0     | 0.259      | 0         | 0.172     | 0.239 | 0          | 0     | 0.08  | 0.243  |          |
| TCGA-CG-4436-01<br>0     |           | 0       | 0         | 0     | 0.343      | 0         | 0         | 0.28  | 0          | 0     | 0.242 | 0.136  | 0        |
| TCGA-BR-A44U-01<br>0.356 | 0.001     | 0       | 0.084     | 0     | 0.014      | 0         | 0.448     | 0.077 | 0          | 0     | 0.015 |        |          |
| TCGA-RD-A7BT-01<br>0.233 | 0         | 0.004   | 0         | 0     | 0.149      | 0.314     | 0         | 0.035 | 0.197      | 0     | 0     | 0.067  |          |
| TCGA-CG-4466-01<br>0.248 | 0         | 0.007   | 0         | 0     | 0.154      | 0         | 0.037     | 0.405 | 0          | 0     | 0.149 |        |          |
| TCGA-R5-A7ZF-01<br>0.282 | 0         | 0       | 0         | 0.01  | 0.259      | 0         | 0.305     | 0.104 | 0.018      | 0     | 0.022 |        |          |
| TCGA-CG-5726-01<br>0.243 | 0         | 0       | 0         | 0.253 | 0.002      | 0         | 0.165     | 0.293 | 0          | 0     | 0.045 |        |          |
| TCGA-HU-A4GX-01<br>0.161 | 0.226     | 0.012   | 0.003     | 0     | 0          | 0.228     | 0         | 0.286 | 0.084      | 0     | 0     |        |          |
| TCGA-HU-A4G9-01<br>0.031 | 0.261     | 0       | 0         | 0.024 | 0.322      | 0         | 0.074     | 0.286 | 0.003      | 0     |       |        |          |
| TCGA-HU-A4GC-01<br>0.313 | 0.001     | 0       | 0.125     | 0     | 0          | 0.007     | 0         | 0.306 | 0.102      | 0     | 0     | 0.136  |          |
| TCGA-IN-A6RJ-01<br>0     | 0.242     | 0       | 0         | 0     | 0.115      | 0.086     | 0         | 0.081 | 0.159      | 0.282 | 0     |        |          |
| TCGA-HU-A4H8-01<br>0.124 | 0         | 0.023   | 0.008     | 0     | 0          | 0.32      | 0.022     | 0     | 0.22       | 0     | 0     | 0.282  |          |
| TCGA-HU-A4GT-01<br>0.305 | 0         | 0.009   | 0         | 0.066 | 0.071      | 0         | 0.167     | 0.327 | 0          | 0     | 0.057 |        |          |
| TCGA-BR-8483-01<br>0.255 | 0.001     | 0       | 0.042     | 0     | 0.052      | 0         | 0.402     | 0.117 | 0          | 0     | 0.12  |        |          |
| TCGA-KB-A93H-01<br>0.312 | 0         | 0.002   | 0         | 0     | 0.03       | 0.072     | 0         | 0.112 | 0.373      | 0     | 0     | 0.099  |          |

|                 |       |       |       |       |       |       |       |       |       |       |       |
|-----------------|-------|-------|-------|-------|-------|-------|-------|-------|-------|-------|-------|
| TCGA-HU-8249-01 | 0     | 0     | 0     | 0.065 | 0.281 | 0     | 0.171 | 0.312 | 0.015 | 0     |       |
|                 | 0.014 | 0.14  | 0     | 0.002 |       |       |       |       |       |       |       |
| TCGA-HU-A4H2-01 | 0     | 0.135 | 0     | 0     | 0.18  | 0.004 | 0.229 | 0.117 | 0     | 0     | 0.193 |
|                 | 0.142 | 0     | 0     |       |       |       |       |       |       |       |       |
| TCGA-R5-A7ZI-01 | 0.045 | 0.017 | 0     | 0     | 0.199 | 0     | 0.18  | 0.022 | 0     | 0     | 0.315 |
|                 | 0.222 | 0     | 0.001 |       |       |       |       |       |       |       |       |
| TCGA-BR-4280-01 | 0     | 0     | 0     | 0.11  | 0.172 | 0     | 0.148 | 0.244 | 0     | 0     | 0.162 |
|                 | 0.165 | 0     | 0     |       |       |       |       |       |       |       |       |
| TCGA-HU-A4G3-01 | 0     | 0     | 0     | 0.002 | 0.14  | 0     | 0.29  | 0.193 | 0.005 | 0     | 0.014 |
|                 | 0.353 | 0     | 0.003 |       |       |       |       |       |       |       |       |
| TCGA-BR-4371-01 | 0     | 0     | 0     | 0.043 | 0.297 | 0     | 0.031 | 0.357 | 0     | 0     | 0.09  |
|                 | 0.18  | 0     | 0.001 |       |       |       |       |       |       |       |       |
| TCGA-SW-A7EB-01 | 0.059 | 0     | 0     | 0     | 0.244 | 0     | 0.295 | 0.125 | 0.007 | 0     |       |
|                 | 0.033 | 0.235 | 0     | 0.003 |       |       |       |       |       |       |       |
| TCGA-IN-A6RS-01 | 0     | 0     | 0     | 0     | 0.185 | 0     | 0.154 | 0.013 | 0.02  | 0     | 0.258 |
|                 | 0.357 | 0     | 0.012 |       |       |       |       |       |       |       |       |
| TCGA-B7-A5TJ-01 | 0     | 0     | 0     | 0.028 | 0.328 | 0     | 0.194 | 0.202 | 0     | 0     | 0.088 |
|                 | 0.155 | 0     | 0.004 |       |       |       |       |       |       |       |       |
| TCGA-BR-A4J4-01 | 0     | 0     | 0     | 0     | 0.257 | 0     | 0.237 | 0.064 | 0     | 0     | 0.157 |
|                 | 0.282 | 0     | 0.002 |       |       |       |       |       |       |       |       |
| TCGA-HU-A4GQ-01 | 0.056 | 0     | 0     | 0.003 | 0.269 | 0     | 0.056 | 0.248 | 0     | 0     |       |
|                 | 0.153 | 0.214 | 0     | 0     |       |       |       |       |       |       |       |
| TCGA-CD-A4MH-01 | 0     | 0.154 | 0     | 0     | 0.126 | 0     | 0.336 | 0.022 | 0     | 0     | 0.055 |
|                 | 0.292 | 0     | 0.014 |       |       |       |       |       |       |       |       |
| TCGA-VQ-A8P2-01 | 0     | 0     | 0     | 0.124 | 0.115 | 0     | 0     | 0.494 | 0     | 0     | 0.041 |
|                 | 0.223 | 0     | 0.004 |       |       |       |       |       |       |       |       |
| TCGA-HU-A4GP-01 | 0     | 0.017 | 0     | 0     | 0.141 | 0     | 0.411 | 0.021 | 0.004 | 0     |       |
|                 | 0.04  | 0.364 | 0     | 0.003 |       |       |       |       |       |       |       |
| TCGA-HU-8238-01 | 0     | 0     | 0.01  | 0     | 0.076 | 0     | 0.487 | 0     | 0     | 0.062 | 0.359 |
|                 | 0     | 0.006 |       |       |       |       |       |       |       |       |       |
| TCGA-R5-A7O7-01 | 0     | 0     | 0.021 | 0     | 0     | 0     | 0.494 | 0.027 | 0     | 0     | 0.207 |
|                 | 0.237 | 0.004 | 0.011 |       |       |       |       |       |       |       |       |
| TCGA-VQ-A925-01 | 0     | 0     | 0     | 0.029 | 0     | 0     | 0.297 | 0.263 | 0     | 0     | 0.075 |
|                 | 0.327 | 0.003 | 0.005 |       |       |       |       |       |       |       |       |
| TCGA-FP-A8CX-01 | 0     | 0.048 | 0     | 0     | 0.22  | 0     | 0.298 | 0.048 | 0     | 0     | 0.157 |
|                 | 0.216 | 0     | 0.014 |       |       |       |       |       |       |       |       |
| TCGA-BR-A4J8-01 | 0     | 0.184 | 0     | 0     | 0.149 | 0     | 0.372 | 0.001 | 0     | 0     | 0.073 |
|                 | 0.218 | 0     | 0.003 |       |       |       |       |       |       |       |       |
| TCGA-VQ-A91N-01 | 0     | 0     | 0     | 0     | 0.345 | 0.021 | 0.284 | 0.028 | 0     | 0     | 0.089 |
|                 | 0.234 | 0     | 0     |       |       |       |       |       |       |       |       |
| TCGA-HU-A4GU-01 | 0     | 0     | 0     | 0     | 0.196 | 0     | 0.165 | 0.201 | 0.026 | 0     | 0.026 |
|                 | 0.384 | 0     | 0.002 |       |       |       |       |       |       |       |       |
| TCGA-VQ-A8PU-01 | 0     | 0     | 0     | 0     | 0.234 | 0     | 0.343 | 0.073 | 0     | 0     | 0.122 |
|                 | 0.22  | 0.004 | 0.003 |       |       |       |       |       |       |       |       |





[illegible]

[illegible]



|                 |       |       |       |       |       |       |       |       |       |   |       |       |   |
|-----------------|-------|-------|-------|-------|-------|-------|-------|-------|-------|---|-------|-------|---|
| TCGA-VQ-A8P5-01 | 0     | 0     | 0     | 0     | 0.243 | 0.01  | 0     | 0.156 | 0     | 0 | 0.478 | 0.11  | 0 |
|                 | 0.004 |       |       |       |       |       |       |       |       |   |       |       |   |
| TCGA-BR-8059-01 | 0     | 0     | 0     | 0     | 0.115 | 0     | 0.193 | 0.294 | 0     | 0 | 0.159 |       |   |
|                 | 0.231 | 0     | 0.007 |       |       |       |       |       |       |   |       |       |   |
| TCGA-CD-A48C-01 | 0     | 0.245 | 0     | 0     | 0     | 0.003 | 0.189 | 0.198 | 0     | 0 | 0.167 |       |   |
|                 | 0.191 | 0.001 | 0.006 |       |       |       |       |       |       |   |       |       |   |
| TCGA-CG-4460-01 | 0     | 0     | 0     | 0     | 0.367 | 0     | 0.039 | 0.256 | 0     | 0 | 0.129 |       |   |
|                 | 0.209 | 0     | 0     |       |       |       |       |       |       |   |       |       |   |
| TCGA-D7-8576-01 | 0.007 | 0     | 0     | 0     | 0.241 | 0.021 | 0.298 | 0.08  | 0     | 0 | 0.146 |       |   |
|                 | 0.207 | 0     | 0     |       |       |       |       |       |       |   |       |       |   |
| TCGA-BR-8372-01 | 0.018 | 0     | 0     | 0     | 0.16  | 0     | 0.149 | 0.172 | 0     | 0 | 0.309 |       |   |
|                 | 0.192 | 0     | 0     |       |       |       |       |       |       |   |       |       |   |
| TCGA-D7-5578-01 | 0.007 | 0     | 0     | 0.034 | 0.069 | 0     | 0.421 | 0.036 | 0     | 0 |       |       |   |
|                 | 0.236 | 0.18  | 0     | 0.016 |       |       |       |       |       |   |       |       |   |
| TCGA-FP-7735-01 | 0     | 0.156 | 0     | 0     | 0.137 | 0.04  | 0.073 | 0.191 | 0     | 0 | 0.311 |       |   |
|                 | 0.087 | 0     | 0.003 |       |       |       |       |       |       |   |       |       |   |
| TCGA-CG-5720-01 | 0     | 0     | 0     | 0     | 0.257 | 0     | 0.285 | 0.051 | 0     | 0 | 0.139 |       |   |
|                 | 0.248 | 0     | 0.02  |       |       |       |       |       |       |   |       |       |   |
| TCGA-VQ-AA6K-01 | 0     | 0.084 | 0     | 0     | 0.41  | 0     | 0.111 | 0.091 | 0     | 0 | 0.181 |       |   |
|                 | 0.108 | 0     | 0.014 |       |       |       |       |       |       |   |       |       |   |
| TCGA-VQ-A94O-01 | 0     | 0     | 0     | 0.023 | 0     | 0     | 0.209 | 0.272 | 0     | 0 | 0.116 |       |   |
|                 | 0.374 | 0     | 0.005 |       |       |       |       |       |       |   |       |       |   |
| TCGA-VQ-A924-01 | 0     | 0     | 0     | 0     | 0.194 | 0     | 0.345 | 0.042 | 0     | 0 | 0.131 |       |   |
|                 | 0.285 | 0     | 0.003 |       |       |       |       |       |       |   |       |       |   |
| TCGA-VQ-A8P8-01 | 0     | 0.053 | 0     | 0     | 0.28  | 0     | 0.07  | 0.206 | 0     | 0 | 0.151 | 0.228 |   |
|                 | 0     | 0.013 |       |       |       |       |       |       |       |   |       |       |   |
| TCGA-KB-A6F7-01 | 0     | 0     | 0     | 0     | 0.152 | 0     | 0.4   | 0     | 0     | 0 | 0.052 | 0.391 | 0 |
|                 | 0.006 |       |       |       |       |       |       |       |       |   |       |       |   |
| TCGA-IN-A6RR-01 | 0     | 0     | 0     | 0     | 0     | 0     | 0.562 | 0.005 | 0     | 0 | 0.08  | 0.333 |   |
|                 | 0.009 | 0.01  |       |       |       |       |       |       |       |   |       |       |   |
| TCGA-D7-6815-01 | 0     | 0     | 0     | 0.045 | 0.225 | 0     | 0.235 | 0.06  | 0     | 0 | 0.154 |       |   |
|                 | 0.278 | 0     | 0.004 |       |       |       |       |       |       |   |       |       |   |
| TCGA-IN-AB1X-01 | 0     | 0.065 | 0     | 0     | 0.251 | 0.015 | 0.047 | 0.227 | 0.152 | 0 |       |       |   |
|                 | 0.127 | 0.117 | 0     | 0     |       |       |       |       |       |   |       |       |   |
| TCGA-MX-A5UJ-01 | 0     | 0     | 0     | 0.047 | 0.132 | 0     | 0.259 | 0.142 | 0     | 0 | 0.124 |       |   |
|                 | 0.292 | 0     | 0.005 |       |       |       |       |       |       |   |       |       |   |
| TCGA-CD-5799-01 | 0     | 0     | 0     | 0     | 0.021 | 0     | 0.259 | 0.133 | 0     | 0 | 0.257 |       |   |
|                 | 0.325 | 0     | 0.005 |       |       |       |       |       |       |   |       |       |   |
| TCGA-CG-4465-01 | 0     | 0     | 0     | 0     | 0.13  | 0     | 0.063 | 0.29  | 0     | 0 | 0.28  | 0.237 | 0 |
|                 |       |       |       |       |       |       |       |       |       |   |       |       |   |
| TCGA-D7-A6F0-01 | 0     | 0.005 | 0     | 0     | 0.027 | 0     | 0.178 | 0.245 | 0     | 0 | 0.148 |       |   |
|                 | 0.396 | 0     | 0.001 |       |       |       |       |       |       |   |       |       |   |
| TCGA-CG-4443-01 | 0     | 0     | 0     | 0     | 0.079 | 0     | 0.09  | 0.369 | 0     | 0 | 0.117 | 0.342 |   |
|                 | 0     | 0.003 |       |       |       |       |       |       |       |   |       |       |   |
| TCGA-FP-8211-01 | 0     | 0.327 | 0     | 0     | 0.048 | 0     | 0.244 | 0.022 | 0     | 0 | 0.123 |       |   |

|                 |       |       |       |       |       |       |       |       |       |   |       |       |   |
|-----------------|-------|-------|-------|-------|-------|-------|-------|-------|-------|---|-------|-------|---|
| 0.233           | 0     | 0.002 |       |       |       |       |       |       |       |   |       |       |   |
| TCGA-MX-A666-01 | 0     | 0     | 0     | 0     | 0.322 | 0     | 0.025 | 0.288 | 0.007 | 0 | 0.031 |       |   |
| 0.314           | 0     | 0.014 |       |       |       |       |       |       |       |   |       |       |   |
| TCGA-CD-8525-01 | 0     | 0     | 0     | 0     | 0.047 | 0     | 0.458 | 0     | 0.044 | 0 | 0.067 |       |   |
| 0.368           | 0.002 | 0.015 |       |       |       |       |       |       |       |   |       |       |   |
| TCGA-HU-A4HB-01 | 0.022 | 0.081 | 0     | 0     | 0.252 | 0.071 | 0.008 | 0.192 | 0     | 0 |       |       |   |
| 0.208           | 0.163 | 0     | 0.004 |       |       |       |       |       |       |   |       |       |   |
| TCGA-CG-5718-01 | 0.079 | 0     | 0     | 0     | 0.211 | 0.019 | 0.26  | 0     | 0     | 0 | 0.293 |       |   |
| 0.138           | 0     | 0     |       |       |       |       |       |       |       |   |       |       |   |
| TCGA-D7-A4Z0-01 | 0     | 0.13  | 0     | 0     | 0.252 | 0     | 0.184 | 0.103 | 0     | 0 | 0.102 |       |   |
| 0.229           | 0     | 0     |       |       |       |       |       |       |       |   |       |       |   |
| TCGA-F1-A72C-01 | 0     | 0     | 0     | 0     | 0.004 | 0     | 0.559 | 0     | 0     | 0 | 0.21  | 0.22  | 0 |
| 0.007           |       |       |       |       |       |       |       |       |       |   |       |       |   |
| TCGA-VQ-A8E3-01 | 0.107 | 0     | 0     | 0     | 0.319 | 0.02  | 0.045 | 0.071 | 0     | 0 | 0.346 |       |   |
| 0.091           | 0     | 0     |       |       |       |       |       |       |       |   |       |       |   |
| TCGA-BR-7715-01 | 0     | 0     | 0     | 0.106 | 0.062 | 0     | 0.35  | 0.151 | 0     | 0 | 0.088 |       |   |
| 0.238           | 0.001 | 0.004 |       |       |       |       |       |       |       |   |       |       |   |
| TCGA-CD-8532-01 | 0     | 0.112 | 0     | 0     | 0.281 | 0.01  | 0.143 | 0.061 | 0     | 0 | 0.256 |       |   |
| 0.137           | 0     | 0.001 |       |       |       |       |       |       |       |   |       |       |   |
| TCGA-BR-8590-01 | 0     | 0.087 | 0     | 0     | 0.242 | 0.01  | 0.051 | 0.197 | 0     | 0 | 0.244 |       |   |
| 0.169           | 0     | 0     |       |       |       |       |       |       |       |   |       |       |   |
| TCGA-BR-8686-01 | 0     | 0.114 | 0     | 0     | 0.21  | 0.014 | 0.177 | 0.083 | 0     | 0 | 0.209 |       |   |
| 0.183           | 0     | 0.01  |       |       |       |       |       |       |       |   |       |       |   |
| TCGA-B7-A5TI-01 | 0     | 0.127 | 0     | 0     | 0.133 | 0     | 0.126 | 0.166 | 0     | 0 | 0.091 |       |   |
| 0.35            | 0     | 0.007 |       |       |       |       |       |       |       |   |       |       |   |
| TCGA-BR-6566-01 | 0     | 0     | 0.03  | 0.049 | 0     | 0     | 0.404 | 0.051 | 0     | 0 | 0.201 |       |   |
| 0.25            | 0.006 | 0.008 |       |       |       |       |       |       |       |   |       |       |   |
| TCGA-BR-8591-01 | 0.011 | 0     | 0     | 0     | 0.291 | 0     | 0.228 | 0.069 | 0     | 0 | 0.116 |       |   |
| 0.281           | 0     | 0.004 |       |       |       |       |       |       |       |   |       |       |   |
| TCGA-ZA-A8F6-01 | 0     | 0     | 0     | 0     | 0.287 | 0     | 0.2   | 0.078 | 0     | 0 | 0.19  | 0.245 | 0 |
| 0               |       |       |       |       |       |       |       |       |       |   |       |       |   |
| TCGA-BR-8484-01 | 0.042 | 0.219 | 0     | 0     | 0.299 | 0.025 | 0     | 0.09  | 0     | 0 | 0.283 |       |   |
| 0.04            | 0     | 0.002 |       |       |       |       |       |       |       |   |       |       |   |
| TCGA-CG-4476-01 | 0.021 | 0.162 | 0     | 0     | 0.183 | 0.006 | 0     | 0.199 | 0     | 0 |       |       |   |
| 0.314           | 0.115 | 0     | 0     |       |       |       |       |       |       |   |       |       |   |
| TCGA-CD-5800-01 | 0     | 0     | 0     | 0     | 0.053 | 0     | 0.546 | 0     | 0.002 | 0 | 0.056 |       |   |
| 0.339           | 0.002 | 0.003 |       |       |       |       |       |       |       |   |       |       |   |
| TCGA-BR-4363-01 | 0     | 0     | 0     | 0     | 0.289 | 0     | 0     | 0.264 | 0     | 0 | 0.273 | 0.174 |   |
| 0               | 0     |       |       |       |       |       |       |       |       |   |       |       |   |
| TCGA-D7-6527-01 | 0     | 0.069 | 0     | 0     | 0.182 | 0     | 0.107 | 0.278 | 0     | 0 | 0.149 |       |   |
| 0.2             | 0     | 0.015 |       |       |       |       |       |       |       |   |       |       |   |
| TCGA-BR-8296-01 | 0     | 0.077 | 0     | 0     | 0.311 | 0.017 | 0.172 | 0.054 | 0     | 0 |       |       |   |
| 0.205           | 0.164 | 0     | 0     |       |       |       |       |       |       |   |       |       |   |
| TCGA-FP-8099-01 | 0.029 | 0.097 | 0     | 0     | 0.255 | 0.019 | 0.023 | 0.139 | 0     | 0 |       |       |   |

|                 |       |       |       |       |       |       |       |       |       |       |       |       |
|-----------------|-------|-------|-------|-------|-------|-------|-------|-------|-------|-------|-------|-------|
|                 | 0.341 | 0.097 | 0     | 0     |       |       |       |       |       |       |       |       |
| TCGA-BR-8368-01 | 0     | 0     | 0     | 0     | 0.165 | 0     | 0.185 | 0.187 | 0     | 0     | 0.142 |       |
|                 | 0.319 | 0     | 0.002 |       |       |       |       |       |       |       |       |       |
| TCGA-BR-8081-01 | 0     | 0.027 | 0     | 0     | 0.262 | 0     | 0.243 | 0.06  | 0     | 0     | 0.212 |       |
|                 | 0.194 | 0     | 0.002 |       |       |       |       |       |       |       |       |       |
| TCGA-RD-A8N1-01 | 0.045 | 0.138 | 0     | 0     | 0.251 | 0.036 | 0     | 0.102 | 0     | 0     |       |       |
|                 | 0.317 | 0.111 | 0     | 0     |       |       |       |       |       |       |       |       |
| TCGA-D7-8575-01 | 0.014 | 0.09  | 0     | 0     | 0.258 | 0     | 0.33  | 0.002 | 0.001 | 0     | 0.075 |       |
|                 | 0.229 | 0     | 0     |       |       |       |       |       |       |       |       |       |
| TCGA-BR-6563-01 | 0     | 0.028 | 0     | 0     | 0.209 | 0.016 | 0.045 | 0.247 | 0     | 0     |       |       |
|                 | 0.251 | 0.191 | 0     | 0.013 |       |       |       |       |       |       |       |       |
| TCGA-ZQ-A9CR-01 | 0     | 0.173 | 0     | 0     | 0.023 | 0     | 0.325 | 0     | 0     | 0     | 0.244 |       |
|                 | 0.209 | 0.013 | 0.013 |       |       |       |       |       |       |       |       |       |
| TCGA-D7-A6EX-01 | 0     | 0     | 0     | 0.032 | 0     | 0     | 0.357 | 0.283 | 0.002 | 0     | 0     |       |
|                 | 0.321 | 0.001 | 0.004 |       |       |       |       |       |       |       |       |       |
| TCGA-IN-8462-01 | 0.049 | 0     | 0     | 0     | 0.166 | 0     | 0.248 | 0.011 | 0.329 | 0     | 0     |       |
|                 | 0.197 | 0     | 0.001 |       |       |       |       |       |       |       |       |       |
| TCGA-F1-A448-01 | 0     | 0.117 | 0     | 0     | 0.222 | 0     | 0.087 | 0.153 | 0     | 0     | 0.216 |       |
|                 | 0.202 | 0     | 0.003 |       |       |       |       |       |       |       |       |       |
| TCGA-HF-7132-01 | 0     | 0.022 | 0     | 0     | 0.33  | 0     | 0.177 | 0.134 | 0     | 0     | 0.202 |       |
|                 | 0.134 | 0     | 0     |       |       |       |       |       |       |       |       |       |
| TCGA-BR-6454-01 | 0.014 | 0.074 | 0     | 0     | 0.357 | 0.043 | 0.082 | 0.06  | 0     | 0     |       |       |
|                 | 0.239 | 0.116 | 0     | 0.014 |       |       |       |       |       |       |       |       |
| TCGA-BR-4201-01 | 0     | 0     | 0     | 0     | 0.117 | 0     | 0.016 | 0.412 | 0     | 0     | 0.225 |       |
|                 | 0.227 | 0.003 | 0     |       |       |       |       |       |       |       |       |       |
| TCGA-IN-7808-01 | 0.205 | 0     | 0     | 0     | 0.194 | 0     | 0.204 | 0.058 | 0     | 0     | 0.083 |       |
|                 | 0.255 | 0     | 0.002 |       |       |       |       |       |       |       |       |       |
| TCGA-HU-A4G8-01 | 0.023 | 0.002 | 0     | 0     | 0.305 | 0.027 | 0     | 0.246 | 0     | 0     |       |       |
|                 | 0.242 | 0.155 | 0     | 0     |       |       |       |       |       |       |       |       |
| TCGA-BR-A4J9-01 | 0     | 0.32  | 0     | 0     | 0.074 | 0     | 0     | 0.25  | 0     | 0.167 | 0.178 | 0     |
|                 | 0.01  |       |       |       |       |       |       |       |       |       |       |       |
| TCGA-BR-4367-01 | 0     | 0.004 | 0     | 0     | 0.233 | 0     | 0.065 | 0.216 | 0     | 0     | 0.252 |       |
|                 | 0.226 | 0     | 0.005 |       |       |       |       |       |       |       |       |       |
| TCGA-CD-8530-01 | 0     | 0.276 | 0     | 0     | 0.058 | 0     | 0.199 | 0.093 | 0     | 0     | 0.123 |       |
|                 | 0.249 | 0     | 0.002 |       |       |       |       |       |       |       |       |       |
| TCGA-BR-A44T-01 | 0.145 | 0.251 | 0     | 0     | 0.151 | 0.027 | 0.048 | 0.096 | 0     | 0     |       |       |
|                 | 0.172 | 0.111 | 0     | 0     |       |       |       |       |       |       |       |       |
| TCGA-D7-8578-01 | 0     | 0.209 | 0     | 0     | 0.303 | 0     | 0.141 | 0.033 | 0     | 0     | 0.142 |       |
|                 | 0.165 | 0     | 0.006 |       |       |       |       |       |       |       |       |       |
| TCGA-D7-5577-01 | 0.084 | 0     | 0     | 0     | 0.23  | 0     | 0.093 | 0.18  | 0     | 0     | 0.308 | 0.104 |
|                 | 0     | 0     |       |       |       |       |       |       |       |       |       |       |
| TCGA-RD-A8N5-01 | 0     | 0     | 0     | 0     | 0.072 | 0     | 0.129 | 0.259 | 0.017 | 0     | 0.194 |       |
|                 | 0.325 | 0.001 | 0.004 |       |       |       |       |       |       |       |       |       |
| TCGA-VQ-A8PM-01 | 0     | 0.042 | 0     | 0     | 0.337 | 0     | 0.066 | 0.113 | 0     | 0     | 0.219 |       |

|                 |       |       |       |       |   |   |   |       |       |       |       |       |       |       |       |   |
|-----------------|-------|-------|-------|-------|---|---|---|-------|-------|-------|-------|-------|-------|-------|-------|---|
| TCGA-BR-4279-01 | 0.173 | 0     | 0.05  | 0     | 0 | 0 | 0 | 0.322 | 0     | 0     | 0.292 | 0     | 0     | 0.18  | 0.198 | 0 |
| TCGA-BR-7707-01 | 0.008 | 0     | 0     | 0     | 0 | 0 | 0 | 0.185 | 0     | 0.377 | 0.134 | 0     | 0     | 0.031 | 0.268 | 0 |
| TCGA-D7-A4YU-01 | 0.105 | 0     | 0.005 | 0.104 | 0 | 0 | 0 | 0.156 | 0.028 | 0.15  | 0     | 0     | 0     | 0.315 | 0.141 | 0 |
| TCGA-RD-A8N2-01 | 0     | 0.087 | 0     | 0     | 0 | 0 | 0 | 0.274 | 0     | 0.097 | 0.156 | 0     | 0     | 0.209 | 0.176 | 0 |
| TCGA-CG-4305-01 | 0     | 0     | 0     | 0     | 0 | 0 | 0 | 0.276 | 0.022 | 0.063 | 0.225 | 0     | 0     | 0.222 | 0.192 | 0 |
| TCGA-VQ-A92D-01 | 0     | 0     | 0     | 0.012 | 0 | 0 | 0 | 0.553 | 0     | 0     | 0     | 0.108 | 0.321 | 0     | 0.006 | 0 |
| TCGA-D7-A6EV-01 | 0     | 0.065 | 0     | 0     | 0 | 0 | 0 | 0.019 | 0     | 0.148 | 0.288 | 0     | 0     | 0.133 | 0.339 | 0 |
| TCGA-BR-8058-01 | 0     | 0.166 | 0     | 0     | 0 | 0 | 0 | 0.275 | 0     | 0.11  | 0.042 | 0     | 0     | 0.233 | 0.166 | 0 |
| TCGA-HU-A4H5-01 | 0     | 0     | 0     | 0     | 0 | 0 | 0 | 0.394 | 0.016 | 0     | 0.296 | 0.002 | 0     | 0.068 | 0.224 | 0 |
| TCGA-VQ-A923-01 | 0.05  | 0.027 | 0     | 0     | 0 | 0 | 0 | 0.335 | 0.011 | 0.018 | 0.133 | 0     | 0     | 0.283 | 0.141 | 0 |
| TCGA-D7-8579-01 | 0     | 0.044 | 0     | 0     | 0 | 0 | 0 | 0.303 | 0.006 | 0.08  | 0.208 | 0     | 0     | 0.152 | 0.207 | 0 |
| TCGA-RD-A8NB-01 | 0.008 | 0.05  | 0     | 0     | 0 | 0 | 0 | 0.261 | 0.01  | 0.112 | 0.113 | 0     | 0     | 0.23  | 0.216 | 0 |
| TCGA-BR-A4J7-01 | 0.025 | 0.291 | 0     | 0     | 0 | 0 | 0 | 0.129 | 0.056 | 0.014 | 0.142 | 0     | 0     | 0.211 | 0.132 | 0 |
| TCGA-BR-6801-01 | 0     | 0     | 0     | 0     | 0 | 0 | 0 | 0.067 | 0     | 0.223 | 0.272 | 0     | 0     | 0.01  | 0.426 | 0 |
| TCGA-FP-7916-01 | 0.037 | 0.264 | 0     | 0     | 0 | 0 | 0 | 0.306 | 0.038 | 0.006 | 0.035 | 0     | 0     | 0.216 | 0.086 | 0 |
| TCGA-B7-A5TK-01 | 0.021 | 0.132 | 0     | 0     | 0 | 0 | 0 | 0.174 | 0.058 | 0.115 | 0.036 | 0     | 0     | 0.331 | 0.133 | 0 |
| TCGA-BR-4253-01 | 0     | 0.035 | 0     | 0     | 0 | 0 | 0 | 0.306 | 0     | 0     | 0.202 | 0     | 0     | 0.344 | 0.111 | 0 |
| TCGA-D7-A747-01 | 0.098 | 0.043 | 0     | 0     | 0 | 0 | 0 | 0.238 | 0     | 0.143 | 0.155 | 0     | 0     | 0.123 | 0.2   | 0 |
| TCGA-FP-7829-01 | 0     | 0     | 0     | 0     | 0 | 0 | 0 | 0.129 | 0     | 0.298 | 0.163 | 0     | 0     | 0.085 | 0.321 | 0 |
| TCGA-BR-8286-01 | 0     | 0     | 0     | 0     | 0 | 0 | 0 | 0.189 | 0     | 0.151 | 0.185 | 0     | 0     | 0.185 | 0.288 | 0 |
| TCGA-VQ-A8PK-01 | 0     | 0.165 | 0     | 0     | 0 | 0 | 0 | 0.203 | 0     | 0.332 | 0     | 0     | 0     | 0.155 | 0.142 | 0 |
| TCGA-BR-8284-01 | 0.013 | 0.015 | 0     | 0     | 0 | 0 | 0 | 0.245 | 0.077 | 0.052 | 0.178 | 0     | 0     | 0.013 | 0.015 | 0 |

|                 |       |       |       |       |       |       |       |       |      |      |       |       |
|-----------------|-------|-------|-------|-------|-------|-------|-------|-------|------|------|-------|-------|
| 0.231           | 0.19  | 0     | 0     |       |       |       |       |       |      |      |       |       |
| TCGA-CD-8526-01 | 0     | 0.102 | 0     | 0     | 0.11  | 0     | 0.444 | 0     | 0    | 0    | 0.096 | 0.183 |
| 0               | 0.064 |       |       |       |       |       |       |       |      |      |       |       |
| TCGA-D7-6519-01 | 0     | 0     | 0.146 | 0     | 0     | 0     | 0.442 | 0.007 | 0    | 0.04 | 0.151 |       |
| 0.205           | 0.004 | 0.005 |       |       |       |       |       |       |      |      |       |       |
| TCGA-BR-A4J5-01 | 0     | 0.271 | 0     | 0     | 0.131 | 0     | 0.192 | 0.018 | 0    | 0    | 0.17  |       |
| 0.21            | 0     | 0.007 |       |       |       |       |       |       |      |      |       |       |
| TCGA-VQ-A8PC-01 | 0     | 0.049 | 0     | 0     | 0.215 | 0     | 0.151 | 0.088 | 0    | 0    | 0.228 |       |
| 0.242           | 0     | 0.026 |       |       |       |       |       |       |      |      |       |       |
| TCGA-BR-8367-01 | 0     | 0.091 | 0     | 0     | 0.283 | 0     | 0.149 | 0.132 | 0    | 0    | 0.166 |       |
| 0.179           | 0     | 0     |       |       |       |       |       |       |      |      |       |       |
| TCGA-VQ-A8E0-01 | 0     | 0.084 | 0     | 0     | 0.236 | 0.011 | 0.17  | 0.044 | 0    | 0    | 0.213 |       |
| 0.242           | 0     | 0     |       |       |       |       |       |       |      |      |       |       |
| TCGA-HU-A4GY-01 | 0.05  | 0.151 | 0     | 0     | 0.239 | 0.028 | 0     | 0.181 | 0    | 0    | 0.265 |       |
| 0.087           | 0     | 0     |       |       |       |       |       |       |      |      |       |       |
| TCGA-HU-A4H3-01 | 0     | 0     | 0     | 0     | 0.059 | 0     | 0.393 | 0.128 | 0    | 0    | 0.187 |       |
| 0.217           | 0.007 | 0.009 |       |       |       |       |       |       |      |      |       |       |
| TCGA-BR-4357-01 | 0.014 | 0.059 | 0     | 0     | 0.355 | 0.018 | 0     | 0.151 | 0    | 0    |       |       |
| 0.231           | 0.166 | 0     | 0.007 |       |       |       |       |       |      |      |       |       |
| TCGA-CG-5717-01 | 0.051 | 0     | 0     | 0     | 0.205 | 0     | 0.168 | 0.121 | 0.14 | 0    | 0     |       |
| 0.315           | 0     | 0     |       |       |       |       |       |       |      |      |       |       |
| TCGA-BR-8080-01 | 0     | 0.166 | 0     | 0     | 0.19  | 0     | 0.185 | 0.101 | 0    | 0    | 0.137 |       |
| 0.21            | 0     | 0.012 |       |       |       |       |       |       |      |      |       |       |
| TCGA-D7-6520-01 | 0     | 0.026 | 0     | 0     | 0.203 | 0     | 0.285 | 0     | 0    | 0    | 0.194 |       |
| 0.284           | 0     | 0.008 |       |       |       |       |       |       |      |      |       |       |
| TCGA-D7-A6EY-01 | 0     | 0     | 0     | 0     | 0.31  | 0     | 0.195 | 0.059 | 0    | 0    | 0.242 | 0.186 |
| 0               | 0.008 |       |       |       |       |       |       |       |      |      |       |       |
| TCGA-VQ-A8PD-01 | 0     | 0     | 0     | 0     | 0.34  | 0.034 | 0.09  | 0.16  | 0    | 0    | 0.201 | 0.167 |
| 0.009           |       |       |       |       |       |       |       |       |      |      |       |       |
| TCGA-BR-8297-01 | 0     | 0.263 | 0     | 0     | 0.088 | 0     | 0.043 | 0.161 | 0    | 0    | 0.14  |       |
| 0.299           | 0     | 0.005 |       |       |       |       |       |       |      |      |       |       |
| TCGA-BR-6455-01 | 0     | 0     | 0     | 0.117 | 0.095 | 0     | 0.261 | 0.197 | 0    | 0    | 0.159 |       |
| 0.166           | 0     | 0.004 |       |       |       |       |       |       |      |      |       |       |
| TCGA-BR-8366-01 | 0     | 0.011 | 0     | 0     | 0.241 | 0.021 | 0.192 | 0.08  | 0    | 0    | 0.263 |       |
| 0.168           | 0     | 0.024 |       |       |       |       |       |       |      |      |       |       |
| TCGA-KB-A93J-01 | 0.074 | 0.197 | 0     | 0     | 0.172 | 0.052 | 0.154 | 0     | 0    | 0    |       |       |
| 0.212           | 0.138 | 0     | 0     |       |       |       |       |       |      |      |       |       |
| TCGA-BR-7851-01 | 0     | 0     | 0     | 0.005 | 0.166 | 0     | 0.269 | 0.141 | 0    | 0    | 0.136 |       |
| 0.264           | 0     | 0.019 |       |       |       |       |       |       |      |      |       |       |
| TCGA-BR-8380-01 | 0     | 0     | 0     | 0     | 0.27  | 0     | 0.183 | 0.2   | 0    | 0    | 0.092 | 0.255 |
| 0               |       |       |       |       |       |       |       |       |      |      |       |       |
| TCGA-BR-6565-01 | 0.045 | 0     | 0     | 0     | 0.243 | 0.013 | 0.263 | 0.033 | 0    | 0    |       |       |
| 0.261           | 0.141 | 0     | 0.002 |       |       |       |       |       |      |      |       |       |
| TCGA-BR-7959-01 | 0     | 0     | 0     | 0     | 0.177 | 0     | 0.23  | 0.152 | 0    | 0    | 0.134 | 0.307 |

|                 |       |       |       |       |       |       |       |       |   |       |       |      |
|-----------------|-------|-------|-------|-------|-------|-------|-------|-------|---|-------|-------|------|
| 0               | 0.001 |       |       |       |       |       |       |       |   |       |       |      |
| TCGA-VQ-A91D-01 | 0     | 0     | 0     | 0.332 | 0.166 | 0     | 0.282 | 0.013 | 0 | 0     | 0.036 |      |
|                 | 0.155 | 0.016 | 0.002 |       |       |       |       |       |   |       |       |      |
| TCGA-CG-5724-01 | 0     | 0     | 0.006 | 0.07  | 0     | 0     | 0.49  | 0     | 0 | 0.193 | 0.207 |      |
|                 | 0.032 | 0.002 |       |       |       |       |       |       |   |       |       |      |
| TCGA-VQ-AA6J-01 | 0     | 0.039 | 0     | 0     | 0.145 | 0.031 | 0     | 0.275 | 0 | 0     | 0.322 |      |
|                 | 0.182 | 0     | 0.005 |       |       |       |       |       |   |       |       |      |
| TCGA-D7-A748-01 | 0     | 0.284 | 0     | 0     | 0.103 | 0     | 0.18  | 0     | 0 | 0.009 | 0.237 |      |
|                 | 0.188 | 0     | 0     |       |       |       |       |       |   |       |       |      |
| TCGA-D7-6525-01 | 0     | 0     | 0     | 0.063 | 0.023 | 0     | 0.409 | 0.103 | 0 | 0     | 0.047 |      |
|                 | 0.352 | 0     | 0.002 |       |       |       |       |       |   |       |       |      |
| TCGA-BR-8683-01 | 0     | 0.051 | 0     | 0     | 0.282 | 0     | 0.232 | 0.014 | 0 | 0     | 0.225 |      |
|                 | 0.195 | 0     | 0.001 |       |       |       |       |       |   |       |       |      |
| TCGA-VQ-AA6G-01 | 0     | 0     | 0     | 0     | 0.207 | 0     | 0.39  | 0     | 0 | 0.139 | 0.26  | 0    |
|                 | 0.004 |       |       |       |       |       |       |       |   |       |       |      |
| TCGA-BR-7704-01 | 0     | 0.158 | 0     | 0     | 0.287 | 0     | 0.159 | 0     | 0 | 0     | 0.326 |      |
|                 | 0.07  | 0     | 0     |       |       |       |       |       |   |       |       |      |
| TCGA-BR-8291-01 | 0     | 0.16  | 0     | 0     | 0.247 | 0.011 | 0.026 | 0.099 | 0 | 0     | 0.218 |      |
|                 | 0.239 | 0     | 0     |       |       |       |       |       |   |       |       |      |
| TCGA-D7-8570-01 | 0.09  | 0.193 | 0     | 0     | 0.241 | 0.027 | 0     | 0.114 | 0 | 0     | 0.259 |      |
|                 | 0.069 | 0     | 0.007 |       |       |       |       |       |   |       |       |      |
| TCGA-VQ-AA64-01 | 0     | 0.207 | 0     | 0     | 0.068 | 0     | 0.23  | 0.087 | 0 | 0.009 | 0.101 |      |
|                 | 0.292 | 0     | 0.005 |       |       |       |       |       |   |       |       |      |
| TCGA-BR-4187-01 | 0     | 0     | 0     | 0     | 0.301 | 0     | 0.18  | 0.121 | 0 | 0     | 0.147 | 0.25 |
|                 | 0.001 |       |       |       |       |       |       |       |   |       |       |      |
| TCGA-HU-A4GJ-01 | 0.108 | 0.125 | 0     | 0     | 0.261 | 0.044 | 0.076 | 0.108 | 0 | 0     |       |      |
|                 | 0.16  | 0.107 | 0     | 0.011 |       |       |       |       |   |       |       |      |
| TCGA-D7-6521-01 | 0.023 | 0.003 | 0     | 0     | 0.204 | 0     | 0.367 | 0     | 0 | 0     | 0.161 |      |
|                 | 0.232 | 0     | 0.01  |       |       |       |       |       |   |       |       |      |
| TCGA-CD-8524-01 | 0     | 0.175 | 0     | 0     | 0.135 | 0.006 | 0.312 | 0     | 0 | 0     | 0.157 |      |
|                 | 0.208 | 0     | 0.007 |       |       |       |       |       |   |       |       |      |
| TCGA-BR-8592-01 | 0     | 0     | 0     | 0     | 0.268 | 0     | 0.116 | 0.172 | 0 | 0     | 0.174 |      |
|                 | 0.26  | 0     | 0.01  |       |       |       |       |       |   |       |       |      |
| TCGA-BR-7722-01 | 0     | 0.12  | 0     | 0     | 0.121 | 0     | 0.283 | 0.036 | 0 | 0     | 0.264 |      |
|                 | 0.177 | 0     | 0     |       |       |       |       |       |   |       |       |      |
| TCGA-BR-7958-01 | 0.17  | 0.087 | 0     | 0     | 0.31  | 0.022 | 0.01  | 0.047 | 0 | 0     | 0.237 |      |
|                 | 0.117 | 0     | 0     |       |       |       |       |       |   |       |       |      |
| TCGA-BR-A4IV-01 | 0     | 0.198 | 0     | 0     | 0.22  | 0     | 0.188 | 0.049 | 0 | 0     | 0.178 |      |
|                 | 0.161 | 0     | 0.006 |       |       |       |       |       |   |       |       |      |
| TCGA-D7-8574-01 | 0.108 | 0.248 | 0     | 0     | 0.138 | 0.048 | 0     | 0.172 | 0 | 0     |       |      |
|                 | 0.121 | 0.164 | 0     | 0.002 |       |       |       |       |   |       |       |      |
| TCGA-CG-4475-01 | 0     | 0.181 | 0     | 0     | 0.111 | 0     | 0.064 | 0.211 | 0 | 0     | 0.251 |      |
|                 | 0.18  | 0     | 0     |       |       |       |       |       |   |       |       |      |
| TCGA-RD-A8N4-01 | 0     | 0.027 | 0     | 0     | 0.222 | 0     | 0.123 | 0.179 | 0 | 0     | 0.192 |      |



|                 |       |       |       |       |       |       |       |       |   |       |       |       |
|-----------------|-------|-------|-------|-------|-------|-------|-------|-------|---|-------|-------|-------|
| 0               | 0.002 |       |       |       |       |       |       |       |   |       |       |       |
| TCGA-VQ-A91K-01 | 0     | 0.004 | 0     | 0     | 0.282 | 0     | 0.263 | 0.034 | 0 | 0     | 0.134 |       |
|                 | 0.284 | 0     | 0     |       |       |       |       |       |   |       |       |       |
| TCGA-BR-8678-01 | 0     | 0     | 0     | 0.019 | 0.046 | 0     | 0.419 | 0.069 | 0 | 0     | 0.062 |       |
|                 | 0.381 | 0     | 0.004 |       |       |       |       |       |   |       |       |       |
| TCGA-CD-5804-01 | 0     | 0.157 | 0     | 0     | 0.182 | 0.006 | 0.202 | 0.056 | 0 | 0     |       |       |
|                 | 0.243 | 0.152 | 0     | 0     |       |       |       |       |   |       |       |       |
| TCGA-D7-A6EZ-01 | 0.015 | 0.121 | 0     | 0     | 0.259 | 0.015 | 0.049 | 0.103 | 0 | 0     |       |       |
|                 | 0.326 | 0.112 | 0     | 0     |       |       |       |       |   |       |       |       |
| TCGA-VQ-A922-01 | 0     | 0     | 0     | 0.058 | 0.280 | 0.369 | 0     | 0     | 0 | 0.039 | 0.248 |       |
|                 | 0.003 | 0.003 |       |       |       |       |       |       |   |       |       |       |
| TCGA-VQ-AA68-01 | 0.032 | 0     | 0     | 0     | 0.404 | 0     | 0.032 | 0.102 | 0 | 0     | 0.22  |       |
|                 | 0.209 | 0     | 0     |       |       |       |       |       |   |       |       |       |
| TCGA-HF-7133-01 | 0     | 0     | 0     | 0     | 0.275 | 0     | 0.057 | 0.263 | 0 | 0     | 0.094 |       |
|                 | 0.310 | 0.001 |       |       |       |       |       |       |   |       |       |       |
| TCGA-F1-6874-01 | 0     | 0     | 0     | 0     | 0.308 | 0     | 0.163 | 0.149 | 0 | 0     | 0.26  | 0.119 |
|                 | 0     | 0     |       |       |       |       |       |       |   |       |       |       |
| TCGA-BR-4191-01 | 0.03  | 0.151 | 0     | 0     | 0.239 | 0     | 0     | 0.154 | 0 | 0     | 0.31  | 0.115 |
|                 | 0     | 0     |       |       |       |       |       |       |   |       |       |       |
| TCGA-MX-A663-01 | 0     | 0     | 0     | 0.004 | 0.203 | 0     | 0.178 | 0.221 | 0 | 0     | 0.069 |       |
|                 | 0.324 | 0     | 0.001 |       |       |       |       |       |   |       |       |       |
| TCGA-RD-A7BW-01 | 0.019 | 0.218 | 0     | 0     | 0.202 | 0.006 | 0.165 | 0.025 | 0 | 0     |       |       |
|                 | 0.215 | 0.151 | 0     | 0     |       |       |       |       |   |       |       |       |
| TCGA-BR-8365-01 | 0     | 0.128 | 0     | 0     | 0.214 | 0.004 | 0.068 | 0.182 | 0 | 0     |       |       |
|                 | 0.168 | 0.220 | 0.015 |       |       |       |       |       |   |       |       |       |
| TCGA-CD-A489-01 | 0     | 0.076 | 0     | 0     | 0.130 | 0.116 | 0.195 | 0     | 0 | 0.171 |       |       |
|                 | 0.307 | 0     | 0.004 |       |       |       |       |       |   |       |       |       |
| TCGA-IP-7968-01 | 0     | 0.042 | 0     | 0     | 0.359 | 0.019 | 0.101 | 0.111 | 0 | 0     |       |       |
|                 | 0.219 | 0.150 | 0     |       |       |       |       |       |   |       |       |       |
| TCGA-HU-8610-01 | 0     | 0.087 | 0     | 0     | 0.272 | 0     | 0.180 | 0.041 | 0 | 0     | 0.221 |       |
|                 | 0.199 | 0     | 0     |       |       |       |       |       |   |       |       |       |
| TCGA-BR-4257-01 | 0     | 0.020 | 0     | 0     | 0.263 | 0     | 0.180 | 0.115 | 0 | 0     | 0.204 | 0.219 |
|                 | 0     | 0     |       |       |       |       |       |       |   |       |       |       |
| TCGA-BR-7196-01 | 0     | 0.030 | 0     | 0     | 0.269 | 0.002 | 0.208 | 0.114 | 0 | 0     | 0.23  |       |
|                 | 0.145 | 0     | 0.001 |       |       |       |       |       |   |       |       |       |
| TCGA-VQ-A928-01 | 0.021 | 0     | 0     | 0.092 | 0.183 | 0     | 0.265 | 0.101 | 0 | 0     |       |       |
|                 | 0.132 | 0.206 | 0     | 0     |       |       |       |       |   |       |       |       |
| TCGA-CG-5721-01 | 0.015 | 0     | 0     | 0     | 0.221 | 0     | 0.159 | 0.124 | 0 | 0     | 0.323 |       |
|                 | 0.156 | 0     | 0.002 |       |       |       |       |       |   |       |       |       |
| TCGA-CD-8531-01 | 0.201 | 0     | 0     | 0     | 0.350 | 0.034 | 0.124 | 0     | 0 | 0.204 |       |       |
|                 | 0.087 | 0     | 0     |       |       |       |       |       |   |       |       |       |
| TCGA-FP-8210-01 | 0     | 0.246 | 0     | 0     | 0.205 | 0.008 | 0.059 | 0.143 | 0 | 0     |       |       |
|                 | 0.161 | 0.177 | 0     | 0.002 |       |       |       |       |   |       |       |       |
| TCGA-CG-4440-01 | 0     | 0     | 0     | 0     | 0     | 0     | 0.224 | 0.231 | 0 | 0.046 | 0.073 |       |

|                 |       |       |       |       |       |      |       |       |       |       |       |   |       |       |       |
|-----------------|-------|-------|-------|-------|-------|------|-------|-------|-------|-------|-------|---|-------|-------|-------|
| TCGA-BR-4368-01 | 0.414 | 0.008 | 0.004 | 0     | 0     | 0    | 0     | 0.345 | 0     | 0     | 0.298 | 0 | 0     | 0.191 | 0.165 |
| TCGA-BR-8371-01 | 0     | 0     | 0     | 0     | 0.069 | 0    | 0     | 0     | 0     | 0.104 | 0.343 | 0 | 0     | 0.183 |       |
| TCGA-HF-A5NB-01 | 0.301 | 0     | 0     | 0.024 | 0     | 0    | 0.148 | 0.007 | 0     | 0.229 | 0.2   | 0 | 0     | 0.129 |       |
| TCGA-VQ-A8PF-01 | 0.263 | 0     | 0     | 0.048 | 0.15  | 0    | 0     | 0.339 | 0.023 | 0     | 0.062 | 0 | 0     | 0.314 |       |
| TCGA-HJ-7597-01 | 0.057 | 0     | 0.007 | 0     | 0     | 0    | 0.171 | 0     | 0.333 | 0.168 | 0     | 0 | 0.093 |       |       |
| TCGA-BR-6803-01 | 0.224 | 0.008 | 0.004 | 0     | 0     | 0    | 0.3   | 0     | 0.169 | 0.086 | 0     | 0 | 0.26  | 0.175 | 0     |
| TCGA-B7-5818-01 | 0.009 | 0     | 0     | 0     | 0     | 0    | 0.092 | 0     | 0.218 | 0.127 | 0     | 0 | 0.267 |       |       |
| TCGA-VQ-AA69-01 | 0.294 | 0     | 0.002 | 0     | 0     | 0    | 0.144 | 0     | 0.296 | 0.095 | 0     | 0 | 0.173 |       |       |
| TCGA-F1-6875-01 | 0.288 | 0.002 | 0.002 | 0     | 0     | 0    | 0.096 | 0.227 | 0     | 0.281 | 0.221 | 0 | 0     | 0.001 |       |
| TCGA-FP-7998-01 | 0.171 | 0.002 | 0.001 | 0.066 | 0.22  | 0    | 0     | 0.327 | 0.029 | 0     | 0.041 | 0 | 0     | 0.266 |       |
| TCGA-CD-5798-01 | 0.051 | 0     | 0.001 | 0     | 0.018 | 0    | 0     | 0.141 | 0     | 0.349 | 0.002 | 0 | 0     | 0.253 |       |
| TCGA-BR-6456-01 | 0.233 | 0     | 0.005 | 0     | 0     | 0    | 0.213 | 0     | 0.233 | 0.091 | 0     | 0 | 0.222 |       |       |
| TCGA-VQ-A94P-01 | 0.236 | 0     | 0.004 | 0     | 0     | 0    | 0.31  | 0     | 0.214 | 0.096 | 0     | 0 | 0.131 | 0.249 |       |
| TCGA-CD-5813-01 | 0     | 0     |       | 0.061 | 0     | 0    | 0.027 | 0.044 | 0     | 0.3   | 0.116 | 0 | 0     | 0.067 |       |
| TCGA-BR-4370-01 | 0.371 | 0     | 0.013 | 0     | 0.062 | 0    | 0     | 0.346 | 0     | 0.08  | 0.13  | 0 | 0     | 0.209 | 0.157 |
| TCGA-BR-6457-01 | 0     | 0.016 |       | 0     | 0     | 0    | 0.247 | 0     | 0.263 | 0.076 | 0     | 0 | 0.248 |       |       |
| TCGA-IN-8663-01 | 0.161 | 0     | 0.005 | 0     | 0     | 0.29 | 0     | 0     | 0.074 | 0.233 | 0     | 0 | 0.11  | 0.286 |       |
| TCGA-CG-5719-01 | 0.001 | 0.006 |       | 0     | 0     | 0    | 0.197 | 0.004 | 0.222 | 0.144 | 0     | 0 | 0.247 |       |       |
| TCGA-BR-8373-01 | 0.182 | 0     | 0.003 | 0     | 0     | 0    | 0.339 | 0     | 0.241 | 0.062 | 0     | 0 | 0.107 |       |       |
| TCGA-IN-A7NU-01 | 0.246 | 0     | 0.005 | 0     | 0.193 | 0    | 0     | 0     | 0.007 | 0.192 | 0.112 | 0 | 0     | 0.283 |       |
| TCGA-VQ-A91A-01 | 0.206 | 0.004 | 0.002 | 0     | 0.049 | 0    | 0     | 0.156 | 0     | 0.325 | 0.024 | 0 | 0     | 0.144 |       |
| TCGA-BR-6564-01 | 0.286 | 0     | 0.014 | 0     | 0.027 | 0    | 0     | 0.148 | 0     | 0.14  | 0.182 | 0 | 0     | 0.373 |       |

|                 |       |       |       |       |       |       |       |       |       |   |       |       |
|-----------------|-------|-------|-------|-------|-------|-------|-------|-------|-------|---|-------|-------|
|                 | 0.127 | 0     | 0.003 |       |       |       |       |       |       |   |       |       |
| TCGA-HU-8602-01 | 0     | 0     | 0     | 0     | 0.218 | 0     | 0.115 | 0.257 | 0     | 0 | 0.192 |       |
|                 | 0.217 | 0     | 0     |       |       |       |       |       |       |   |       |       |
| TCGA-MX-A5UG-01 | 0.011 |       | 0.007 | 0     | 0     | 0.298 | 0     | 0.184 | 0.054 | 0 | 0     |       |
|                 | 0.227 | 0.214 | 0     | 0.005 |       |       |       |       |       |   |       |       |
| TCGA-CD-8535-01 | 0     | 0     | 0     | 0     | 0.087 | 0     | 0.271 | 0.316 | 0.003 | 0 | 0.02  |       |
|                 | 0.301 | 0     | 0.002 |       |       |       |       |       |       |   |       |       |
| TCGA-BR-6458-01 | 0.023 |       | 0.118 | 0     | 0     | 0.207 | 0     | 0.112 | 0.117 | 0 | 0     |       |
|                 | 0.298 | 0.126 | 0     | 0     |       |       |       |       |       |   |       |       |
| TCGA-CD-8529-01 | 0     | 0.161 | 0     | 0     | 0.293 | 0.025 | 0.106 | 0.081 | 0     | 0 |       |       |
|                 | 0.214 | 0.117 | 0     | 0.003 |       |       |       |       |       |   |       |       |
| TCGA-HF-7131-01 | 0     | 0.139 | 0     | 0     | 0.265 | 0.002 | 0.12  | 0.109 | 0     | 0 | 0.261 |       |
|                 | 0.105 | 0     | 0     |       |       |       |       |       |       |   |       |       |
| TCGA-VQ-A91Z-01 | 0     | 0     | 0     | 0.021 | 0.304 | 0     | 0     | 0.448 | 0.019 | 0 | 0.04  |       |
|                 | 0.166 | 0     | 0.002 |       |       |       |       |       |       |   |       |       |
| TCGA-BR-4256-01 | 0     | 0.067 | 0     | 0     | 0.307 | 0     | 0.08  | 0.142 | 0.019 | 0 | 0.208 |       |
|                 | 0.169 | 0     | 0.008 |       |       |       |       |       |       |   |       |       |
| TCGA-FP-8209-01 | 0.039 |       | 0.131 | 0     | 0     | 0.274 | 0     | 0.194 | 0.032 | 0 | 0     |       |
|                 | 0.194 | 0.136 | 0     | 0     |       |       |       |       |       |   |       |       |
| TCGA-VQ-A8PQ-01 | 0.069 |       | 0.066 | 0     | 0     | 0.313 | 0     | 0     | 0.184 | 0 | 0     | 0.257 |
|                 | 0.111 | 0     | 0     |       |       |       |       |       |       |   |       |       |
| TCGA-VQ-A8PP-01 | 0     | 0     | 0     | 0.043 | 0.154 | 0     | 0.21  | 0.192 | 0     | 0 | 0.091 |       |
|                 | 0.304 | 0     | 0.005 |       |       |       |       |       |       |   |       |       |
| TCGA-D7-6524-01 | 0     | 0     | 0     | 0     | 0.254 | 0     | 0.286 | 0.04  | 0     | 0 | 0.176 | 0.243 |
|                 | 0     | 0     |       |       |       |       |       |       |       |   |       |       |
| TCGA-BR-7723-01 | 0.017 |       | 0.054 | 0     | 0     | 0.057 | 0.003 | 0.007 | 0.474 | 0 | 0     |       |
|                 | 0.156 | 0.233 | 0     | 0     |       |       |       |       |       |   |       |       |
| TCGA-CD-5803-01 | 0.025 |       | 0.001 | 0     | 0     | 0.234 | 0.002 | 0.222 | 0.082 | 0 | 0     |       |
|                 | 0.273 | 0.16  | 0     | 0     |       |       |       |       |       |   |       |       |
| TCGA-BR-6709-01 | 0.033 |       | 0.04  | 0     | 0     | 0.271 | 0.016 | 0.165 | 0.044 | 0 | 0     |       |
|                 | 0.272 | 0.148 | 0     | 0.012 |       |       |       |       |       |   |       |       |
| TCGA-BR-6705-01 | 0     | 0     | 0     | 0     | 0.06  | 0     | 0.437 | 0.015 | 0     | 0 | 0.258 | 0.218 |
|                 | 0     | 0.012 |       |       |       |       |       |       |       |   |       |       |
| TCGA-CG-4462-01 | 0     | 0.134 | 0     | 0     | 0.27  | 0.007 | 0     | 0.19  | 0     | 0 | 0.293 | 0.107 |
|                 | 0     | 0     |       |       |       |       |       |       |       |   |       |       |
| TCGA-D7-6522-01 | 0.058 |       | 0     | 0     | 0     | 0.215 | 0     | 0.202 | 0.047 | 0 | 0     | 0.232 |
|                 | 0.232 | 0     | 0.014 |       |       |       |       |       |       |   |       |       |
| TCGA-KB-A93G-01 | 0     | 0.173 | 0     | 0     | 0.106 | 0     | 0.349 | 0     | 0     | 0 | 0.151 |       |
|                 | 0.219 | 0     | 0.001 |       |       |       |       |       |       |   |       |       |
| TCGA-D7-6818-01 | 0.011 |       | 0     | 0     | 0     | 0.162 | 0     | 0.372 | 0.031 | 0 | 0     | 0.163 |
|                 | 0.261 | 0     | 0.001 |       |       |       |       |       |       |   |       |       |

Table-S5(TIMER): Infiltration level of tumor associated immune cells in STAD estimated by using TIMER algorithms.

| sample          | B_cell      | T_cell.CD4  | T_cell.CD8  | Neutrophil  | Macrophage  | DC          |
|-----------------|-------------|-------------|-------------|-------------|-------------|-------------|
| TCGA-HU-A4GD-01 | 0           | 0.124879817 | 0           | 0.032734817 | 0           | 0           |
| TCGA-HU-8244-01 | 0           | 0.033221835 | 0           | 0.017552133 | 0           | 0.019743613 |
| TCGA-VQ-A91X-01 | 0           | 0.061169874 | 0           | 0.028313836 | 0           | 0.0307036   |
| TCGA-BR-A4QL-01 | 0.006743775 | 0.127758428 | 0           | 0.033371661 | 0           | 0.116765824 |
| TCGA-BR-6710-01 | 0.0262881   | 0.036371807 | 0.077508861 | 0.079525115 | 0.022037736 | 0           |
| TCGA-VQ-A8DT-01 | 0           | 0.113307281 | 0           | 0.091434412 | 0           | 0.097594084 |
| TCGA-CG-4436-01 | 0.03510107  | 0.064855373 | 0.060671407 | 0.203626531 | 0           | 0.111743728 |
| TCGA-BR-A44U-01 | 0           | 0.042656558 | 0           | 0.033498012 | 0.07402081  | 0.084842454 |
| TCGA-RD-A7BT-01 | 0           | 0.266680115 | 0           | 0.062286957 | 0           | 0.036007779 |
| TCGA-CG-4466-01 | 0.007941295 | 0.035353243 | 0.022206816 | 0.068091868 | 0           | 0.032366169 |
| TCGA-R5-A7ZF-01 | 0           | 0.041030618 | 0           | 0           | 0.097715225 |             |
| TCGA-CG-5726-01 | 0           | 0.068734986 | 0           | 0.020592826 | 0           | 0.057463482 |
| TCGA-HU-A4GX-01 | 0.211863986 | 0.207170213 | 0           | 0.115734844 | 0           | 0.392313948 |
| TCGA-HU-A4G9-01 | 0           | 0.019895261 | 0           | 0.026320566 | 0           | 0           |
| TCGA-HU-A4GC-01 | 0           | 0.313219816 | 0           | 0.077119601 | 0           | 0.186953137 |
| TCGA-IN-A6RJ-01 | 0           | 0           | 0.238482649 | 0           | 0           |             |
| TCGA-HU-A4H8-01 | 0.281961893 | 0           | 0           | 0           | 0.611750612 |             |
| TCGA-HU-A4GT-01 | 0.036927041 | 0.097648023 | 0.040603497 | 0.083089164 | 0           | 0.131993322 |
| TCGA-BR-8483-01 | 0           | 0.00362118  | 0.050702662 | 0.079060735 | 0.07766036  |             |
| TCGA-KB-A93H-01 | 0           | 0.085750825 | 0           | 0.040344562 | 0           | 0.008297083 |
| TCGA-HU-8249-01 | 0.001064089 | 0.209970238 | 0           | 0.068605415 | 0           | 0.099614755 |
| TCGA-HU-A4H2-01 | 0.027076126 | 0.257386205 | 0           | 0.197294297 | 0           | 0.393455199 |
| TCGA-R5-A7ZI-01 | 0.1826216   | 0           | 0           | 0           | 0.241906243 |             |
| TCGA-BR-4280-01 | 0.145767609 | 0.1003991   | 0           | 0.04203726  | 0           | 0.380520679 |
| TCGA-HU-A4G3-01 | 0.027409105 | 0.109271756 | 0.005387242 | 0.079236116 | 0.00304844  |             |
|                 | 0.16057096  |             |             |             |             |             |
| TCGA-BR-4371-01 | 0           | 0.251654062 | 0           | 0.085049609 | 0           | 0.094360481 |
| TCGA-SW-A7EB-01 | 0.021004799 | 0.048099014 | 0           | 0.014386632 | 0           | 0           |
| TCGA-IN-A6RS-01 | 0.084064198 | 0.063191361 | 0.186020994 | 0.040576293 | 0           | 0.288739494 |
| TCGA-B7-A5TJ-01 | 0           | 0.095584028 | 0           | 0.050089692 | 0.111236626 | 0.087356732 |
| TCGA-BR-A4J4-01 | 0.169350433 | 0           | 0.689370474 | 0.086496052 | 0           | 0.575609273 |
| TCGA-HU-A4GQ-01 | 0.039943382 | 0.044390773 | 0.628626588 | 0.086760675 | 0           | 0.587077904 |
| TCGA-CD-A4MH-01 | 0.02137443  | 0.175388968 | 0.045991546 | 0.072173716 | 0           | 0.231768668 |
| TCGA-VQ-A8P2-01 | 0           | 0.056200528 | 0           | 0.020766042 | 0           | 0.02980169  |
| TCGA-HU-A4GP-01 | 0.024590249 | 0.152173799 | 0.025397288 | 0.081433239 | 0           | 0.185049967 |
| TCGA-HU-8238-01 | 0.027109374 | 0.121256903 | 0.001999209 | 0.111326767 | 0           | 0.104096182 |
| TCGA-R5-A7O7-01 | 0           | 0.035027939 | 0           | 0.055371269 | 0           | 0.058164268 |
| TCGA-VQ-A925-01 | 0.039526333 | 0.143746525 | 0.120941382 | 0.140003608 | 0           | 0.264863458 |
| TCGA-FP-A8CX-01 | 0.085415253 | 0.147812389 | 0           | 0.078048731 | 0           | 0.141223683 |
| TCGA-BR-A4J8-01 | 0           | 0.089446252 | 0.368260035 | 0.041815209 | 0.154975163 | 0.491527896 |
| TCGA-VQ-A91N-01 | 0.04293638  | 0.143124101 | 0           | 0.090904849 | 0.028908323 | 0.142943901 |

|                 |             |             |             |             |             |             |
|-----------------|-------------|-------------|-------------|-------------|-------------|-------------|
| TCGA-HU-A4GU-01 | 0           | 0.02278391  | 0.233174563 | 0.098873504 | 0.003968074 | 0.19970413  |
| TCGA-VQ-A8PU-01 | 0.002317915 | 0.060633275 | 0           | 0.028063289 | 0           | 0.0799409   |
| TCGA-D7-6526-01 | 0           | 0.084596625 | 0.100440201 | 0.067978021 | 0.00865035  | 0.264827681 |
| TCGA-BR-A4CS-01 | 0           | 0.105253272 | 0.124902712 | 0.119761792 | 0.143883256 | 0.164535358 |
| TCGA-HU-A4H6-01 | 0.14025977  | 0.24780233  | 0           | 0.191434333 | 0           | 0.189424078 |
| TCGA-3M-AB46-01 | 0.012295989 | 0.060422037 | 0.043370732 | 0.070070731 | 0.090505414 | 0.096154291 |
| TCGA-VQ-A8PB-01 | 0.07328818  | 0.003167551 | 0.558918561 | 0.074166097 | 0.145415164 | 0.272606608 |
| TCGA-FP-8631-01 | 0.021381536 | 0           | 0.128534425 | 0.055051548 | 0.113899604 | 0.030952228 |
| TCGA-BR-8676-01 | 0.05984443  | 0.018911651 | 0           | 0           | 0           | 0.112829544 |
| TCGA-VQ-A8DV-01 | 0           | 0.164022983 | 0           | 0.023614007 | 0.014233893 | 0.198998639 |
| TCGA-CG-5725-01 | 0           | 0.062744552 | 0           | 0.030273624 | 0.064199811 | 0.038624261 |
| TCGA-CD-A48A-01 | 0.010171762 | 0.103180467 | 0           | 0.025956177 | 0.022148263 | 0.271533465 |
| TCGA-BR-7197-01 | 0           | 0.10314018  | 0           | 0.076636744 | 0.097485043 | 0.03935579  |
| TCGA-VQ-A8DU-01 | 0           | 0.184716276 | 0.007871825 | 0.071848243 | 0.069085218 | 0.154353281 |
| TCGA-CD-A4MG-01 | 0.066345607 | 0.116986007 | 0           | 0.058199149 | 0.081468425 | 0.273818852 |
| TCGA-CG-4442-01 | 0.045604352 | 0           | 0.153535181 | 0.057078749 | 0.056094578 | 0.14045458  |
| TCGA-CD-8534-01 | 0.014771122 | 0.190725145 | 0           | 0.124816501 | 0           | 0.273644087 |
| TCGA-BR-4294-01 | 0.036380395 | 0           | 0.15825334  | 0.061157855 | 0.050080076 | 0.033026634 |
| TCGA-BR-8077-01 | 0.030738143 | 0.296834703 | 0           | 0.076159184 | 0           | 0.263000719 |
| TCGA-BR-8679-01 | 0           | 0           | 0.320973788 | 0.111641692 | 0.28214589  | 0.223048763 |
| TCGA-D7-A6F2-01 | 0.004473529 | 0.286148198 | 0           | 0           | 0           | 0.481748969 |
| TCGA-BR-8295-01 | 0           | 0.145417293 | 0           | 0.013131325 | 0.154228569 | 0           |
| TCGA-R5-A7ZR-01 | 0           | 0.15103262  | 0           | 0.052108486 | 0           | 0.053786451 |
| TCGA-VQ-A8PX-01 | 0.250073659 | 0.129703192 | 0           | 0.00388065  | 0           | 0.242359545 |
| TCGA-BR-8687-01 | 0           | 0.091502881 | 0.229903712 | 0.084320516 | 0.128828749 | 0.276348274 |
| TCGA-IN-A7NR-01 | 0           | 0.003391486 | 0           | 0.065216048 | 0           | 0.062123262 |
| TCGA-CD-8533-01 | 0           | 0.1282196   | 0           | 0.051386212 | 0.103867498 | 0.053681464 |
| TCGA-VQ-A8PH-01 | 0.049192026 | 0.156412201 | 0           | 0.039886672 | 0           | 0.098826196 |
| TCGA-HU-A4H0-01 | 0.548690765 | 0.113934285 | 0           | 0           | 0           | 1.297666458 |
| TCGA-BR-8680-01 | 0           | 0.058748663 | 0.105281291 | 0.034227287 | 0.083114658 | 0.022029534 |
| TCGA-IN-A6RL-01 | 0.055466746 | 0.015328366 | 0.115568497 | 0.04883765  | 0           | 0.063766011 |
| TCGA-D7-A74A-01 | 0.037643249 | 0.106403951 | 0           | 0.002136181 | 0           | 0.158132075 |
| TCGA-VQ-A94T-01 | 0.01938952  | 0           | 0.357107469 | 0.099491233 | 0.164289224 | 0.064941475 |
| TCGA-RD-A8N0-01 | 0.567602072 | 0.444427157 | 0.070480889 | 0.192685394 | 0.007564398 | 0.326572856 |
| TCGA-CG-4469-01 | 0.024850199 | 0.072326833 | 0           | 0.103519508 | 0           | 0.2753194   |
| TCGA-VQ-A91U-01 | 0.113145578 | 0.114775241 | 0           | 0.02100525  | 0           | 0.137435019 |
| TCGA-CD-8527-01 | 0           | 0.015354849 | 0.096635506 | 0.070826602 | 0.020208513 | 0.269823173 |
| TCGA-IN-7806-01 | 0           | 0.051112065 | 0           | 0.114732387 | 0.098405138 | 0.154918593 |
| TCGA-BR-8487-01 | 0.067088491 | 0.062549566 | 0           | 0.033732568 | 0           | 0.198738793 |
| TCGA-BR-A4PF-01 | 0.178146358 | 0.202533569 | 0.12172159  | 0.315438832 | 0           | 0.502096816 |
| TCGA-F1-6177-01 | 0.054422367 | 0.13973763  | 0.015194973 | 0.029528486 | 0           | 0.233970231 |

|                 |             |             |             |             |             |             |
|-----------------|-------------|-------------|-------------|-------------|-------------|-------------|
| TCGA-CG-5734-01 | 0.146043245 | 0.076184214 | 0           | 0.043049767 | 0           | 0.206191244 |
| TCGA-BR-A4CR-01 | 0.012225785 | 0.096274429 | 0.347046752 | 0.026356176 | 0.107078631 | 0.217842003 |
| TCGA-IN-AB1V-01 | 0           | 0           | 0           | 0.408701663 | 0           | 0.079811719 |
| TCGA-CD-8528-01 | 0.008638699 | 0           | 0.230915771 | 0.078239165 | 0.228246358 | 0.192118131 |
| TCGA-BR-8382-01 | 0.041750848 | 0.001081899 | 0.077853038 | 0.071014627 | 0.018643358 | 0.17097112  |
| TCGA-CD-5801-01 | 0.261017391 | 0.003147565 | 0           | 0           | 0           | 0.445992465 |
| TCGA-CG-4301-01 | 0.094633634 | 0           | 0.419904314 | 0.106717891 | 0.488487873 | 0.446608589 |
| TCGA-RD-A8MV-01 | 0.401995358 | 0.259539575 | 0           | 0.105185953 | 0           | 0.477862214 |
| TCGA-CG-4304-01 | 0.126715791 | 0.03489299  | 0.067819803 | 0.156113678 | 0.20486707  | 0.292588526 |
| TCGA-RD-A7C1-01 | 0.056307338 | 0.011928958 | 0           | 0.048599803 | 0           | 0.062021212 |
| TCGA-D7-A4YX-01 | 0.093836496 | 0.212866856 | 0           | 0.234370814 | 0           | 0.294883381 |
| TCGA-VQ-A927-01 | 0.027254695 | 0.156277748 | 0           | 0.125383214 | 0.08604181  | 0.120223096 |
| TCGA-HU-A4G2-01 | 0.066108408 | 0.230149196 | 0.095910194 | 0.077589841 | 0           | 0.397248844 |
| TCGA-CG-5732-01 | 0.291004902 | 0.059175266 | 0           | 0.021449049 | 0           | 0.282190028 |
| TCGA-3M-AB47-01 | 0.126383543 | 0           | 0.788209914 | 0.069441359 | 0.448844768 | 0.197788481 |
| TCGA-BR-8588-01 | 0.20333531  | 0           | 0.775980929 | 0.077414229 | 0.009959386 | 0.449334113 |
| TCGA-CG-4444-01 | 0.127368927 | 0.024865391 | 0.258017052 | 0.074900179 | 0.072207869 | 0.421505862 |
| TCGA-HU-8604-01 | 0.090794228 | 0.08659949  | 0.482812364 | 0.154508073 | 0           | 0.363026129 |
| TCGA-BR-4366-01 | 0.131946686 | 0           | 0.34367154  | 0.123131187 | 0.203127554 | 0.211618109 |
| TCGA-BR-7717-01 | 0.049333816 | 0           | 0.492763519 | 0.027811237 | 0.085213333 | 0.198169463 |
| TCGA-CD-A486-01 | 0.353309087 | 0           | 0           | 0           | 0.978130133 |             |
| TCGA-BR-6707-01 | 0.048192729 | 0.183002432 | 0           | 0.009484848 | 0           | 0.193680118 |
| TCGA-VQ-AA6D-01 | 0           | 0.090029875 | 0           | 0.046726484 | 0           | 0.12124468  |
| TCGA-D7-8573-01 | 0.066416281 | 0.081009251 | 0           | 0.018394867 | 0           | 0.191777043 |
| TCGA-CG-5716-01 | 0.259024433 | 0.069444778 | 0           | 0.096342609 | 0           | 0.012913919 |
| TCGA-VQ-A91V-01 | 0           | 0.196460508 | 0           | 0.125099503 | 0           | 0.091741604 |
| TCGA-VQ-A8P3-01 | 0.131360726 | 0           | 0.385338424 | 0           | 0.097412122 | 0.356791555 |
| TCGA-BR-4267-01 | 0.158351607 | 0           | 0.158728323 | 0.100679336 | 0.241850973 | 0.676229524 |
| TCGA-CG-4306-01 | 0.083130495 | 0           | 0.406451337 | 0.210712964 | 0.294133094 | 0.307937822 |
| TCGA-VQ-A94R-01 | 0.035445464 | 0.19834727  | 0.023021743 | 0.068441168 | 0.205199138 | 0.35086057  |
| TCGA-HU-A4GF-01 | 0.034338663 | 0.202116754 | 0.036921547 | 0.097157025 | 0           | 0.251651912 |
| TCGA-BR-4369-01 | 0.130390542 | 0.175661641 | 0.008685299 | 0.045351649 | 0.155776447 | 0.393043649 |
| TCGA-IN-A6RI-01 | 0.125863176 | 0.125533554 | 0           | 0.037876801 | 0           | 0.109399615 |
| TCGA-FP-A9TM-01 | 0.436077063 | 0.245450743 | 0           | 0.139302636 | 0           | 0.003786984 |
| TCGA-FP-A4BF-01 | 0.413850287 | 0           | 0.891354983 | 0.067767541 | 0.085601249 | 1.116843663 |
| TCGA-D7-6528-01 | 0           | 0.098312248 | 0.040508539 | 0.024999881 | 0           | 0.17784762  |
| TCGA-BR-8486-01 | 0.13416807  | 0.127803221 | 0.560138958 | 0.10364302  | 0.02031738  | 0.586165205 |

|                 |             |             |             |             |             |             |
|-----------------|-------------|-------------|-------------|-------------|-------------|-------------|
| TCGA-BR-8589-01 | 0.115609618 | 0.210755386 | 0           | 0           | 0           | 0.425839377 |
| TCGA-BR-A4J6-01 | 0           | 0.018169437 | 0.147566028 | 0.131244597 | 0.311613222 | 0.096796918 |
| TCGA-RD-A8MW-01 | 0.37684532  | 0           | 0.379313376 | 0.184625572 | 0.273775841 |             |
|                 | 0.740505554 |             |             |             |             |             |
| TCGA-HU-A4H4-01 | 0.259703856 | 0.249586099 | 0           | 0.233446319 | 0           | 0.553188511 |
| TCGA-IN-A7NT-01 | 0           | 0.007490831 | 0.000454593 | 0.052099749 | 0.06585123  | 0.072166768 |
| TCGA-HU-A4HD-01 | 0           | 0.316408784 | 0.225378024 | 0.086637773 | 0.083300041 | 0.439041508 |
| TCGA-CG-5722-01 | 0.618177021 | 0.00248122  | 0           | 0.139645781 | 0           | 0.371288167 |
| TCGA-VQ-AA6F-01 | 0.229638671 | 0.283024609 | 0           | 0.17366936  | 0           | 0.323081327 |
| TCGA-HU-A4GH-01 | 0.054655292 | 0.085196155 | 0.042048063 | 0.090014292 | 0           | 0.226560859 |
| TCGA-CG-4438-01 | 0           | 0.288324101 | 0           | 0.133023458 | 0           | 0.312640185 |
| TCGA-BR-8381-01 | 0.237924652 | 0.277268543 | 0           | 0.044984504 | 0           | 0.467481112 |
| TCGA-BR-8690-01 | 0.039524357 | 0.047875474 | 0           | 0.011789075 | 0           | 0.160630607 |
| TCGA-HF-7134-01 | 0.034353046 | 0.088470565 | 0.237917738 | 0.105417808 | 0           | 0.194972536 |
| TCGA-BR-8682-01 | 0           | 0.166835314 | 0           | 0.089977932 | 0.205048751 | 0.32845164  |
| TCGA-BR-8289-01 | 0           | 0           | 0.829465396 | 0.041018842 | 0.277587072 | 0.539435468 |
| TCGA-BR-8369-01 | 0           | 0.047747158 | 0.308647771 | 0.151661988 | 0.088249911 | 0.260481713 |
| TCGA-CG-4437-01 | 0.228155336 | 0.007593231 | 0           | 0           | 0           | 0.559140241 |
| TCGA-CG-5723-01 | 0.331904103 | 0           | 0           | 0           | 0           | 0.677251661 |
| TCGA-VQ-A8PO-01 | 0.195503171 | 0.333021763 | 0           | 0.132795543 | 0           | 0.420919906 |
| TCGA-BR-8361-01 | 0.164223089 | 0.271228823 | 0           | 0.102435149 | 0           | 0.259882145 |
| TCGA-BR-4361-01 | 0.190327707 | 0           | 0.475767775 | 0.079921605 | 0.157813567 | 0.602154002 |
| TCGA-VQ-AA6A-01 | 0           | 0.273152842 | 0           | 0.083122643 | 0           | 0.112549168 |
| TCGA-RD-A8N6-01 | 0           | 0.332241588 | 0           | 0.216222191 | 0.17768763  | 0.163984657 |
| TCGA-BR-8485-01 | 0.09567556  | 0           | 0.547349932 | 0.051195475 | 0.09657937  | 0.230345398 |
| TCGA-VQ-A94U-01 | 0           | 0.144579161 | 0.219363398 | 0.102576208 | 0.162817164 | 0.275987893 |
| TCGA-VQ-A8DZ-01 | 0           | 0.139579708 | 0           | 0.073027273 | 0.22288538  | 0.275957196 |
| TCGA-VQ-A91S-01 | 0.081804305 | 0.066510981 | 0.590598782 | 0.221558942 | 0           | 0.37848505  |
| TCGA-R5-A80S-01 | 0.110856628 | 0.137006366 | 0           | 0.406607749 | 0           | 0.308015881 |
| TCGA-VQ-A8PE-01 | 0.250846777 | 0.13618439  | 0.466285269 | 0.06946228  | 0           | 0.482193048 |
| TCGA-SW-A7EA-01 | 0           | 0           | 0.231140669 | 0           | 0.13301216  |             |
| TCGA-IN-A6RO-01 | 0.052127712 | 0.073722746 | 0           | 0.015314974 | 0           | 0.14265522  |
| TCGA-VQ-A8PJ-01 | 0           | 0.151698413 | 0.060318488 | 0.10498094  | 0.112860061 | 0.183801307 |
| TCGA-EQ-8122-01 | 0.038956062 | 0           | 0.882134393 | 0.054736616 | 0.229536728 | 0.366475758 |
| TCGA-RD-A7BS-01 | 0           | 0.006549267 | 0           | 0.095725698 | 0.004464249 | 0.084204387 |
| TCGA-VQ-A8P5-01 | 0.055824411 | 0           | 0.094561448 | 0.0216203   | 0.127793334 | 0.306285261 |
| TCGA-BR-8059-01 | 0           | 0           | 0.281851771 | 0.083079549 | 0.650155956 | 0.131114741 |
| TCGA-CD-A48C-01 | 0.030083584 | 0           | 0.47544653  | 0.106913449 | 0.096500032 | 0.402527579 |
| TCGA-CG-4460-01 | 0.038519175 | 0.111785051 | 0.051949472 | 0.076276854 | 0.112785726 |             |
|                 | 0.213779831 |             |             |             |             |             |
| TCGA-D7-8576-01 | 0           | 0.208344208 | 0           | 0.031992833 | 0.028801219 | 0.500426669 |
| TCGA-BR-8372-01 | 0.597974996 | 0           | 0           | 0           | 0           | 0.94079279  |
| TCGA-D7-5578-01 | 0.028260798 | 0.184129187 | 0           | 0.091918546 | 0           | 0.302392801 |
| TCGA-FP-7735-01 | 0.122097255 | 0.461725458 | 0           | 0           | 0           | 0.623578914 |

|                 |             |             |             |             |             |             |
|-----------------|-------------|-------------|-------------|-------------|-------------|-------------|
| TCGA-CG-5720-01 | 0.069172788 | 0.251567608 | 0           | 0.159521016 | 0           | 0.368907842 |
| TCGA-VQ-AA6K-01 | 0.032934837 | 0           | 0.506945977 | 0.111969257 | 0.283072198 | 0.182850648 |
| TCGA-VQ-A94O-01 | 0.025465511 | 0.226763341 | 0.083239556 | 0.031181534 | 0           | 0.223200676 |
| TCGA-VQ-A924-01 | 0           | 0.114253152 | 0           | 0.124803564 | 0           | 0.185366078 |
| TCGA-VQ-A8P8-01 | 0.214628046 | 0.170675181 | 0           | 0.107668474 | 0.062065234 | 0.251149669 |
| TCGA-KB-A6F7-01 | 0.082952919 | 0.19378764  | 0           | 0.069840479 | 0           | 0.271432286 |
| TCGA-IN-A6RR-01 | 0.047742991 | 0.066254693 | 0           | 0.052534019 | 0           | 0.078140701 |
| TCGA-D7-6815-01 | 0           | 0.063574748 | 0.107333031 | 0.072426292 | 0.17633654  | 0.180487243 |
| TCGA-IN-AB1X-01 | 0.17486928  | 0.571673159 | 0           | 0.33100566  | 0           | 0.339522185 |
| TCGA-MX-A5UJ-01 | 0.112342711 | 0.019264754 | 0.632532146 | 0.086202966 | 0.172132533 |             |
|                 | 0.321579574 |             |             |             |             |             |
| TCGA-CD-5799-01 | 0           | 0.121918329 | 0.078350387 | 0.022900779 | 0.032362124 | 0.153048292 |
| TCGA-CG-4465-01 | 0.119114316 | 0.128074713 | 0           | 0.141641198 | 0.144450891 | 0.582750306 |
| TCGA-D7-A6F0-01 | 0           | 0.256420265 | 0           | 0.109801343 | 0.103317826 | 0.400062222 |
| TCGA-CG-4443-01 | 0           | 0           | 0.042203522 | 0.177224546 | 0.038122704 |             |
| TCGA-FP-8211-01 | 0.062124243 | 0.18580947  | 0           | 0.095118921 | 0           | 0.214533209 |
| TCGA-MX-A666-01 | 0.246487772 | 0.255133048 | 0           | 0.10571094  | 0           | 0.11757964  |
| TCGA-CD-8525-01 | 0.024148844 | 0.170486331 | 0           | 0.067668144 | 0           | 0.287990959 |
| TCGA-HU-A4HB-01 | 1.00986683  | 0.447064731 | 0           | 0.228868306 | 0           | 0.320834266 |
| TCGA-CG-5718-01 | 0.138417996 | 0.065241098 | 0           | 0.047002097 | 0           | 0.503681332 |
| TCGA-D7-A4Z0-01 | 0.233143198 | 0.089247116 | 0.492998427 | 0.212121687 | 0.104901734 |             |
|                 | 0.517713523 |             |             |             |             |             |
| TCGA-F1-A72C-01 | 0.066286907 | 0.244042266 | 0           | 0.015077462 | 0           | 0.360497571 |
| TCGA-VQ-A8E3-01 | 0.124640485 | 0.2151763   | 0           | 0.141768583 | 0           | 0.265089944 |
| TCGA-BR-7715-01 | 0           | 0.232381057 | 0.039975188 | 0.260806101 | 0.103307369 |             |
| TCGA-CD-8532-01 | 0.263829299 | 0.517612133 | 0           | 0.165044773 | 0           | 0.529893327 |
| TCGA-BR-8590-01 | 0.096119558 | 0           | 0.430632253 | 0.097603315 | 0.414612553 | 0.40500599  |
| TCGA-BR-8686-01 | 0.137180649 | 0.164840238 | 0.167074391 | 0.081295126 | 0.027088903 |             |
|                 | 0.249305507 |             |             |             |             |             |
| TCGA-B7-A5TI-01 | 0.1182412   | 0.071321495 | 0.206813416 | 0.076404108 | 0.190190738 |             |
|                 | 0.199794881 |             |             |             |             |             |
| TCGA-BR-6566-01 | 0.0550006   | 0.175975033 | 0           | 0           | 0           | 0.741845737 |
| TCGA-BR-8591-01 | 0.221512871 | 0.112563177 | 0.285688745 | 0.045508602 | 0           | 0.666944378 |
| TCGA-ZA-A8F6-01 | 0           | 0.125372168 | 0           | 0.186976257 | 0.09596352  | 0.553951185 |
| TCGA-BR-8484-01 | 0.358870308 | 0.450542361 | 0.100959918 | 0.053967615 | 0           | 0.909115242 |
| TCGA-CG-4476-01 | 0.163060459 | 0           | 0.546510394 | 0.151477447 | 0.303154325 | 0.526882518 |
| TCGA-CD-5800-01 | 0           | 0.11959739  | 0           | 0.048669388 | 0.078876058 | 0.142599069 |
| TCGA-BR-4363-01 | 0.280799631 | 0           | 0.644090791 | 0.056694956 | 0.096820928 | 0.76106695  |
| TCGA-D7-6527-01 | 0           | 0.04164644  | 0           | 0.118202664 | 0           | 0.197350747 |
| TCGA-BR-8296-01 | 0.389297887 | 0.310866377 | 0.024149728 | 0.068690497 | 0           | 0.303134496 |
| TCGA-FP-8099-01 | 0.193097225 | 0           | 0.192080042 | 0           | 0           | 0.762672635 |
| TCGA-BR-8368-01 | 0.034751645 | 0.232189541 | 0           | 0.041382062 | 0           | 0.17765667  |
| TCGA-BR-8081-01 | 0.460413075 | 0.231391028 | 0.244561628 | 0.047774383 | 0           | 1.201841511 |
| TCGA-RD-A8N1-01 | 0.50455734  | 0.073242792 | 0.610450935 | 0           | 0           | 0.691599634 |

|                 |             |             |             |             |             |             |
|-----------------|-------------|-------------|-------------|-------------|-------------|-------------|
| TCGA-D7-8575-01 | 0.063884961 | 0.207415309 | 0           | 0.181590335 | 0.129713472 | 0.398021824 |
| TCGA-BR-6563-01 | 0.438738055 | 0.267267639 | 0.206911104 | 0.033554664 | 0.261051535 |             |
|                 | 0.760905999 |             |             |             |             |             |
| TCGA-ZQ-A9CR-01 | 0.101855313 | 0           | 0.855016852 | 0.115553671 | 0.212718469 | 0.345406557 |
| TCGA-D7-A6EX-01 | 0           | 0.113816516 | 0           | 0.03997022  | 0           | 0.073246368 |
| TCGA-IN-8462-01 | 0           | 0           | 0.315780857 | 0.04232239  | 0.330226388 |             |
| TCGA-F1-A448-01 | 0.205704074 | 0           | 0.805048104 | 0.280656949 | 0.185278915 | 0.370612317 |
| TCGA-HF-7132-01 | 0.222832884 | 0.571120448 | 0.011650776 | 0.185878046 | 0           | 0.61050282  |
| TCGA-BR-6454-01 | 0.089737319 | 0.254248524 | 0           | 0.098483798 | 0           | 0.265351292 |
| TCGA-BR-4201-01 | 0.072918508 | 0           | 0.463192678 | 0.186722365 | 0.567356865 | 0.538784175 |
| TCGA-IN-7808-01 | 0.872576696 | 0.716898509 | 0           | 0.08587036  | 0           | 0.232563777 |
| TCGA-HU-A4G8-01 | 0.242719566 | 0.041827712 | 0           | 0.041083664 | 0           | 0.316145733 |
| TCGA-BR-A4J9-01 | 0.128881011 | 0           | 0.20112759  | 0.660633533 | 0           | 0.437591882 |
| TCGA-BR-4367-01 | 0           | 0.3028006   | 0           | 0.149158483 | 0.078492845 | 0.623634425 |
| TCGA-CD-8530-01 | 0.076484164 | 0           | 1.104622651 | 0.020889304 | 0.699399429 | 0.456580635 |
| TCGA-BR-A44T-01 | 1.110203186 | 0.357154686 | 0           | 0.297710003 | 0           | 0.157426825 |
| TCGA-D7-8578-01 | 0.038209837 | 0           | 1.073464784 | 0.012831661 | 0.815017929 | 0.406327937 |
| TCGA-D7-5577-01 | 0.137551155 | 0.224091529 | 0           | 0           | 0           | 0.633189863 |
| TCGA-RD-A8N5-01 | 0.044675467 | 0           | 0.763154239 | 0.238464663 | 0.580363427 | 0.157315834 |
| TCGA-VQ-A8PM-01 | 0.481368034 | 0.139126855 | 0.255671477 | 0.077935044 | 0           | 0.461150532 |
| TCGA-BR-4279-01 | 0.095379215 | 0           | 0.7108394   | 0.245428341 | 0.137218254 | 0.605538451 |
| TCGA-BR-7707-01 | 0           | 0.026436653 | 0.116687292 | 0.108903893 | 0           | 0.163327072 |
| TCGA-D7-A4YU-01 | 0.276140907 | 0.541383754 | 0           | 0.316475104 | 0           | 0.664766368 |
| TCGA-RD-A8N2-01 | 0.052296247 | 0.072946022 | 0           | 0.354630412 | 0.048507215 | 0.350593861 |
| TCGA-CG-4305-01 | 0.071079414 | 0.186443268 | 0.086721631 | 0.107865512 | 0.116554586 |             |
|                 | 0.520686809 |             |             |             |             |             |
| TCGA-VQ-A92D-01 | 0           | 0.16373281  | 0.015488151 | 0.090557282 | 0.175862735 | 0.136152857 |
| TCGA-D7-A6EV-01 | 0.044507503 | 0.160027333 | 0           | 0.020200114 | 0           | 0.213842628 |
| TCGA-BR-8058-01 | 0.459251558 | 0.449399404 | 0.148704603 | 0.05758626  | 0           | 1.127778411 |
| TCGA-HU-A4H5-01 | 0.073020365 | 0.140488974 | 0.150909628 | 0.070914022 | 0           | 0.176185439 |
| TCGA-VQ-A923-01 | 0.147369524 | 0.67745974  | 0           | 0.17240239  | 0           | 0.415470738 |
| TCGA-D7-8579-01 | 0.016814299 | 0.135865639 | 0.385067478 | 0.318403448 | 0.116586472 |             |
|                 | 0.478611394 |             |             |             |             |             |
| TCGA-RD-A8NB-01 | 0.186248005 | 0.36729456  | 0.143647963 | 0.089652895 | 0           | 0.688629096 |
| TCGA-BR-A4J7-01 | 0           | 0.294899732 | 0.049628338 | 0.197680439 | 0.097460185 | 0.522449989 |
| TCGA-BR-6801-01 | 0           | 0.063063394 | 0           | 0.030032004 | 0.110194546 | 0.15640086  |
| TCGA-FP-7916-01 | 0.372882766 | 0.4285651   | 0           | 0.062946383 | 0           | 1.067186599 |
| TCGA-B7-A5TK-01 | 0.285796547 | 0.263206847 | 0.774534776 | 0.287329935 | 0           | 1.626566304 |
| TCGA-BR-4253-01 | 0.194986766 | 0.742058409 | 0           | 0.527668244 | 0           | 0.858927572 |
| TCGA-D7-A747-01 | 0.088106757 | 0.088329499 | 0           | 0.079819286 | 0.038796004 | 0.132250318 |
| TCGA-FP-7829-01 | 0           | 0.055326206 | 0           | 0.063291305 | 0.100867966 | 0.062579632 |
| TCGA-BR-8286-01 | 0.071570924 | 0.195456068 | 0.032683651 | 0.061868149 | 0           | 0.377832506 |
| TCGA-VQ-A8PK-01 | 0.025848654 | 0           | 0.530551207 | 0.062841644 | 0.016926205 | 0.440870711 |
| TCGA-BR-8284-01 | 0.171260067 | 0.282665226 | 0.531212562 | 0.103974728 | 0.037697381 |             |

0.711927577

TCGA-CD-8526-01 0.082424968 0.319639156 0 0.077069039 0.050605149 0.41248279  
TCGA-D7-6519-01 0 0.07142876 0.086896553 0.05003474 0.212908282 0.179080254  
TCGA-BR-A4J5-01 0 0.155878752 0.282440108 0.167416837 0.710844101 0.287937958  
TCGA-VQ-A8PC-01 0.186018816 0.202311952 0.398616569 0.204803542 0.09658889

0.422244297

TCGA-BR-8367-01 0 0 0.3305302 0.201239135 0.23523804 0.372915458  
TCGA-VQ-A8E0-01 0.394995596 0.058943473 0 0 0 0.766039291  
TCGA-HU-A4GY-01 0.586643944 0.778291555 0 0.128208703 0 1.002990159  
TCGA-HU-A4H3-01 0.043130445 0.063998109 0.407074519 0.035377647 0 0.342900384  
TCGA-BR-4357-01 0.146059889 0 0.460638363 0.107224063 0.041362309 0.686307869  
TCGA-CG-5717-01 0 0 0 0.500181106 0 0.189045145  
TCGA-BR-8080-01 0.200080003 0 0.859311675 0.11912718 0.49927828 0.461789549  
TCGA-D7-6520-01 0 0.065299999 0.007787795 0.103368437 0.250389917 0.266456567  
TCGA-D7-A6EY-01 0.352523189 0.235107997 0 0.110499942 0 0.421282603  
TCGA-VQ-A8PD-01 0.358871687 0.549118698 0.10003753 0.268535088 0.116445679

0.424066773

TCGA-BR-8297-01 0 0.131053381 0.07555731 0.565162633 0.007942735 0.409382035  
TCGA-BR-6455-01 0.08603679 0.303071094 0.113784716 0.090212211 0 0.41993378  
TCGA-BR-8366-01 0.328606187 0.236818919 0.62079311 0.092031392 0 1.159964574  
TCGA-KB-A93J-01 0.107940871 0.307618671 0 0.112265449 0 0.567618825  
TCGA-BR-7851-01 0.214206684 0 0.432595891 0.059192696 0 0.518826712  
TCGA-BR-8380-01 0.137849615 0 1.585250811 0.335955659 0.432248153 0.732159034  
TCGA-BR-6565-01 0.196167098 0.17808691 0 0 0 0.924090412  
TCGA-BR-7959-01 0.38618257 0 4.593274551 0 1.507704113 1.074896359  
TCGA-VQ-A91D-01 0.064434687 0.030995132 0.490159278 0.156653184 0.028123815

0.532532675

TCGA-CG-5724-01 0 0.034554719 0 0 0.123188377 0.397968978  
TCGA-VQ-AA6J-01 0.512133926 0.240241819 0 0.131318251 0 1.005571311  
TCGA-D7-A748-01 0.067466674 0 0.264698339 0.030571035 0.177782809 0.448198175  
TCGA-D7-6525-01 0 0 0.242798153 0.06783456 0.739987391 0.18256103  
TCGA-BR-8683-01 0.105086784 0 0.984708468 0.036381226 0.352162981 0.54927684  
TCGA-VQ-AA6G-01 0 0.055426619 0.189168315 0.140683802 0.169670166 0.209886123  
TCGA-BR-7704-01 0.294682553 0.221832905 0 0 0 0.557495195  
TCGA-BR-8291-01 0.245666986 0 1.798859169 0 0.517121008 0.753366687  
TCGA-D7-8570-01 0.666685079 0.023200136 0 0 0 1.4950441  
TCGA-VQ-AA64-01 0 0 0.633741105 0.115190798 1.010034439 0.113392993  
TCGA-BR-4187-01 0.015243867 0 1.083094859 0.275340687 0.479299133 0.691269942  
TCGA-HU-A4GJ-01 1.997282987 0.913962757 0 0.377894028 0 0  
TCGA-D7-6521-01 0.237691318 0.091530477 0.330215951 0.023478614 0.189473923

0.605951903

TCGA-CD-8524-01 0 0.294986604 0 0.053918404 0.318225167 0.481269241  
TCGA-BR-8592-01 0.128190618 0.259626436 0.395152116 0.331183942 0.694306608

0.353207401

|                 |             |             |             |             |             |             |
|-----------------|-------------|-------------|-------------|-------------|-------------|-------------|
| TCGA-BR-7722-01 | 0.077090119 | 0.106457496 | 0           | 0           | 0           | 0.340702215 |
| TCGA-BR-7958-01 | 0.211321344 | 0.166153568 | 0.162853957 | 0           | 0           | 0.5810615   |
| TCGA-BR-A4IV-01 | 0.339067658 | 0           | 2.758093827 | 0.016064737 | 0.899217799 | 0.856524607 |
| TCGA-D7-8574-01 | 0.545384613 | 0.664024576 | 0           | 0.085401205 | 0.036364949 | 0.494813625 |
| TCGA-CG-4475-01 | 0.030989611 | 0           | 0.598480303 | 0.130816979 | 0.637941353 | 0.392383679 |
| TCGA-RD-A8N4-01 | 0.273307251 | 0           | 1.018668968 | 0.454908034 | 0           | 0.575467422 |
| TCGA-BR-8060-01 | 0.147583611 | 0           | 0.904178181 | 0.086840248 | 0.12260086  | 0.527063292 |
| TCGA-VQ-A91Q-01 | 0.019997203 | 0           | 0.676414317 | 0.057661984 | 0.723956513 | 0.160684748 |
| TCGA-BR-7957-01 | 0.199155701 | 0           | 2.203977982 | 0           | 0.775887592 | 0.616122844 |
| TCGA-RD-A8N9-01 | 0.088042383 | 0           | 0.669166439 | 0.090975425 | 0.485486306 | 0.43400096  |
| TCGA-VQ-A91E-01 | 0.297972757 | 0.159973104 | 0           | 0.006808251 | 0           | 0.393245728 |
| TCGA-HU-8608-01 | 0.146212277 | 0.678651353 | 0           | 0.359357138 | 0           | 0.790545524 |
| TCGA-BR-8364-01 | 0.090054538 | 0.096991224 | 0.719658468 | 0.20423288  | 0.862205381 |             |
|                 | 0.588168911 |             |             |             |             |             |
| TCGA-BR-7716-01 | 0.079768916 | 0.633317298 | 0           | 0.054852112 | 0.032914413 | 1.076326428 |
| TCGA-BR-7901-01 | 0.130003865 | 0.060979986 | 0.698291245 | 0.073991287 | 0.334899277 |             |
|                 | 0.704544741 |             |             |             |             |             |
| TCGA-VQ-A91Y-01 | 0.315521354 | 0.28343561  | 0.341826943 | 0.194754619 | 0.166277789 |             |
|                 | 0.708688099 |             |             |             |             |             |
| TCGA-B7-A5TN-01 | 0.089158558 | 0           | 0.973347909 | 0           | 0.780674173 | 0.528464799 |
| TCGA-BR-8677-01 | 0.049367417 | 0.33657303  | 0.069630899 | 0.074160475 | 0           | 0.434700014 |
| TCGA-BR-6453-01 | 0.955656337 | 0.193410616 | 0           | 0.025380187 | 0           | 0.311756008 |
| TCGA-BR-6802-01 | 0.171760375 | 0.076888453 | 0           | 0.08620808  | 0           | 0.510433618 |
| TCGA-VQ-A8E2-01 | 0.003234745 | 0.023815284 | 0.56171875  | 0.078676127 | 0.44942282  |             |
|                 | 0.132103342 |             |             |             |             |             |
| TCGA-CG-4477-01 | 0.397457513 | 0.013697115 | 0.120349301 | 0.125949419 | 0           | 0.771629999 |
| TCGA-BR-8384-01 | 0.041760268 | 0           | 0.377266594 | 0.271560184 | 0.11483703  | 0.457192778 |
| TCGA-CG-4441-01 | 0           | 0.166753988 | 0           | 0.139168578 | 0.274025634 | 0.320792867 |
| TCGA-BR-6852-01 | 0.374501171 | 0.242842153 | 0           | 0           | 0           | 0.872369156 |
| TCGA-D7-6822-01 | 0           | 0.119456895 | 0.134844456 | 0.094455677 | 0.086255319 | 0.169145713 |
| TCGA-BR-6452-01 | 0.092422901 | 0.222763389 | 0.148391433 | 0.085596014 | 0           | 0.566426437 |
| TCGA-D7-8572-01 | 0           | 0.164085378 | 0.303768489 | 0.156756038 | 0.443821387 | 0.35300394  |
| TCGA-VQ-A91K-01 | 0           | 0.442763809 | 0           | 0.123219649 | 0           | 0.535352088 |
| TCGA-BR-8678-01 | 0           | 0.042845538 | 0.331190999 | 0.106107662 | 0           | 0.384818884 |
| TCGA-CD-5804-01 | 0.038623745 | 0.121224955 | 0           | 0.073158295 | 0.061685695 | 0.39541061  |
| TCGA-D7-A6EZ-01 | 0.367681332 | 0           | 0.327005623 | 0           | 0           | 0.977488342 |
| TCGA-VQ-A922-01 | 0           | 0           | 0.58877996  | 0.01748186  | 0.408903645 | 0.148307818 |
| TCGA-VQ-AA68-01 | 0.120310864 | 0           | 0.397986071 | 0.002018505 | 0.366967253 | 0.477362342 |
| TCGA-HF-7133-01 | 0.105440073 | 0.203551059 | 0           | 0.134293556 | 0           | 0.414413574 |
| TCGA-F1-6874-01 | 0.191523832 | 0           | 0.718075862 | 0.079287093 | 0           | 0.625861407 |
| TCGA-BR-4191-01 | 0.364619106 | 0.034137331 | 0.085154571 | 0.038211507 | 0           | 0.99356349  |
| TCGA-MX-A663-01 | 0.161189223 | 0           | 1.554634906 | 0           | 0.505902577 | 0.443934831 |
| TCGA-RD-A7BW-01 | 0.050240068 | 0.015086727 | 0.34419255  | 0.147176848 | 0.167006201 |             |
|                 | 0.365459736 |             |             |             |             |             |

|                 |             |             |             |             |             |             |
|-----------------|-------------|-------------|-------------|-------------|-------------|-------------|
| TCGA-BR-8365-01 | 0.096894866 | 0           | 0.594183442 | 0.447172769 | 0.341321716 | 0.486944158 |
| TCGA-CD-A489-01 | 0.029903965 | 0.078000959 | 0.393064657 | 0.165316226 | 0.348556533 |             |
|                 | 0.336909054 |             |             |             |             |             |
| TCGA-IP-7968-01 | 0.141345176 | 0           | 0.935585985 | 0           | 0.204836162 | 0.862646443 |
| TCGA-HU-8610-01 | 0.185206516 | 0           | 0.813379328 | 0.13635999  | 0           | 0.603209103 |
| TCGA-BR-4257-01 | 0.1416977   | 0           | 0.437869252 | 0.057623607 | 0.070484173 | 0.794656063 |
| TCGA-BR-7196-01 | 0.399862499 | 0           | 1.342384119 | 0           | 0.344072077 | 1.002341925 |
| TCGA-VQ-A928-01 | 0.29863441  | 0.211956465 | 0.095902515 | 0           | 0.359147029 | 0.288808811 |
| TCGA-CG-5721-01 | 0.317112899 | 0.222213716 | 0           | 0.139326757 | 0           | 0.886122341 |
| TCGA-CD-8531-01 | 4.667878932 | 0           | 0           | 0           | 0.726554207 |             |
| TCGA-FP-8210-01 | 0.384149303 | 0.581307336 | 0.010826299 | 0.149404048 | 0.268109794 |             |
|                 | 0.642595119 |             |             |             |             |             |
| TCGA-CG-4440-01 | 0           | 0.212057488 | 0           | 0.10179944  | 0.040093279 | 0.194200818 |
| TCGA-BR-4368-01 | 0.217347037 | 0           | 0.662014376 | 0.118288332 | 0.059934937 | 0.624846241 |
| TCGA-BR-8371-01 | 0.097613749 | 0.130449344 | 0           | 0.450508596 | 0           | 0.456161456 |
| TCGA-HF-A5NB-01 | 0.137052911 | 0.297264404 | 0           | 0           | 0           | 0.520610137 |
| TCGA-VQ-A8PF-01 | 0.746802111 | 0.461703019 | 0           | 0           | 0           | 1.360552014 |
| TCGA-HJ-7597-01 | 0.081189155 | 0.566968627 | 0           | 0.184759167 | 0           | 0.177684563 |
| TCGA-BR-6803-01 | 0.05811343  | 0.173226673 | 0           | 0.153626681 | 0.147611565 | 0.442563343 |
| TCGA-B7-5818-01 | 0.169039835 | 0           | 0           | 0           | 0.360633545 |             |
| TCGA-VQ-AA69-01 | 0.02337474  | 0.095110984 | 0.152745754 | 0.081511    | 0           | 0.257673043 |
| TCGA-F1-6875-01 | 0           | 0.099342304 | 0.027834931 | 0.029699264 | 0.153951318 | 0.030542009 |
| TCGA-FP-7998-01 | 0.393005635 | 0.74272299  | 0.104336229 | 0.192724259 | 0           | 1.593303048 |
| TCGA-CD-5798-01 | 0           | 0.053616883 | 0.085070039 | 0.09535942  | 0.421393676 | 0.413049575 |
| TCGA-BR-6456-01 | 0.172187118 | 0           | 1.740109917 | 0           | 0.779245464 | 0.736764861 |
| TCGA-VQ-A94P-01 | 0.340022982 | 0           | 1.923340169 | 0.147603555 | 0.644081519 | 0.573622199 |
| TCGA-CD-5813-01 | 0.199316184 | 0.118619306 | 0.23489552  | 0           | 0.165599104 | 0.490613227 |
| TCGA-BR-4370-01 | 0.008244577 | 0           | 0.788008746 | 0.289701228 | 0.589154381 | 0.557777511 |
| TCGA-BR-6457-01 | 0.106324039 | 0           | 0.46412467  | 0.077956906 | 0.393268076 | 0.413679964 |
| TCGA-IN-8663-01 | 0           | 0.010871081 | 0           | 0.121608768 | 0.24674571  | 0.162926943 |
| TCGA-CG-5719-01 | 0           | 0.099711988 | 0.158199869 | 0.080201972 | 0.308689428 | 0.3006953   |
| TCGA-BR-8373-01 | 0.037354385 | 0           | 0.724009566 | 0.106891748 | 0.346270647 | 0.258197546 |
| TCGA-IN-A7NU-01 | 0           | 0           | 0.007111036 | 0.121494846 | 0.197833517 |             |
| TCGA-VQ-A91A-01 | 0.193612799 | 0           | 2.222466086 | 0.013325187 | 0.880747957 | 0.649218279 |
| TCGA-BR-6564-01 | 0           | 0.062615465 | 0.060423015 | 0.192868271 | 0.213017519 | 0.232256897 |
| TCGA-HU-8602-01 | 0.153973472 | 0           | 0.471104716 | 0.420075896 | 0           | 0.602784448 |
| TCGA-MX-A5UG-01 | 0.5507468   | 0.423923121 | 0.731619429 | 0.350673841 | 1.061495733 |             |
|                 | 0.371455855 |             |             |             |             |             |
| TCGA-CD-8535-01 | 0           | 0.032745758 | 0           | 0.047783799 | 0.145908718 | 0.164283454 |
| TCGA-BR-6458-01 | 0.222128046 | 0.14986622  | 0.160315001 | 0.071359962 | 0           | 1.100513768 |
| TCGA-CD-8529-01 | 0.281599728 | 0.406625731 | 0.139736307 | 0.127822706 | 0.31545029  |             |
|                 | 0.855343538 |             |             |             |             |             |
| TCGA-HF-7131-01 | 0           | 0.165073611 | 0.331297584 | 0.124965484 | 0.003034762 | 0.448946516 |
| TCGA-VQ-A91Z-01 | 0           | 0.020812858 | 0.084179385 | 0.042361016 | 0.128450628 | 0.048102057 |

TCGA-BR-4256-01 0.316291349 0 1.782072799 0.620109536 0.419128853 1.639119058  
TCGA-FP-8209-01 0.400034613 0.645871297 0.004960986 0.371291724 0.188551587  
0.484289534  
TCGA-VQ-A8PQ-01 1.093826858 1.559092024 0 0.258286225 0 0.601100072  
TCGA-VQ-A8PP-01 0.11268626 0.066628349 0.51466075 0.078882393 0.163021581  
0.473473767  
TCGA-D7-6524-01 0 0.021299428 0.608766357 0.271947773 0.5713248 0.446498987  
TCGA-BR-7723-01 0.116782874 0.008992518 0.419057586 0 0.076099995 0.475740036  
TCGA-CD-5803-01 0.195003181 0.640841604 0 0.054341362 0 0.736230044  
TCGA-BR-6709-01 0.162987009 0.215683489 0 0.076187814 0.537095585 0.528601117  
TCGA-BR-6705-01 0.014507566 0 0.483179972 0.03981216 0.420303886 0.212039193  
TCGA-CG-4462-01 0.019080879 0 0.565478927 0.333342695 0.958623904 0.546793247  
TCGA-D7-6522-01 0.586739995 0.409760497 0 0 0 1.179083093  
TCGA-KB-A93G-01 0.239161788 0 3.910546195 0.01494634 1.593847876 0.8083594  
TCGA-D7-6818-01 0.000927371 0.129254291 0.198011798 0.090745355 0.356975435  
0.471688884

Table-S5(CIBERSORT): Infiltration level of tumor associated immune cells in STAD estimated by using CIBERSORT-ABS algorithms.

| sample          | B.cells.naive | B.cells.memory | Plasma.cells | T.cells.CD8 | T.cells.CD4.naive | T.cells.CD4.memory.resting | T.cells.CD4.memory.activated | T.cells.follicular.helper | T.cells.regulatory..Tregs. | T.cells.gamma.delta | NK.cells.resting | NK.cells.activated | Monocytes   | Macrophages.M0 | Macrophages.M1 | Macrophages.M2 | Dendritic.cells.resting | Dendritic.cells.activated | Mast.cells.resting | Mast.cells.activated | Eosinophils | Neutrophils |             |
|-----------------|---------------|----------------|--------------|-------------|-------------------|----------------------------|------------------------------|---------------------------|----------------------------|---------------------|------------------|--------------------|-------------|----------------|----------------|----------------|-------------------------|---------------------------|--------------------|----------------------|-------------|-------------|-------------|
| TCGA-D7-5577-01 | 0.045494782   | 0              | 0.002937623  | 0.089854053 | 0                 | 0.139587518                | 0.017915431                  | 0.061572956               | 0.078877064                | 0                   | 0                | 0.086164501        | 0.016310341 | 0              | 0.094809784    | 0.184575714    | 0.056048606             | 0.046301438               | 0.071954323        | 0                    | 0           | 0.007595866 |             |
| TCGA-D7-6818-01 | 0.005468393   | 0              | 0.048331432  | 0.023595413 | 0                 | 0.123314045                | 0.00902814                   | 0                         | 0.083350477                | 0                   | 0                | 0.012383883        | 0.059683356 | 0.135524289    | 0.041507996    | 0.216821084    | 0.030301892             | 0                         | 0.085767099        | 0                    | 0.066555699 | 0.058366799 |             |
| TCGA-BR-4280-01 | 0.067150743   | 0              | 0.093553135  | 0           | 0                 | 0.27224079                 | 0.038064378                  | 0.03141726                | 0                          | 0                   | 0.039113655      | 0.016491266        | 0.015682815 | 0.040080213    | 0.099034617    | 0.175024331    | 0.051179157             | 0.014903984               | 0                  | 0.029089209          | 0.016974448 | 0           |             |
| TCGA-D7-8572-01 | 0.03375272    | 0              | 0.066273735  | 0.128202162 | 0                 | 0.170326059                | 0.028606236                  | 0.049889182               | 0.059208783                | 0                   | 0                | 0.014382675        | 0           | 0.019529003    | 0.186013263    | 0.067943939    | 0.119450378             | 0                         | 0.014972364        | 0                    | 0.01530196  | 0           | 0.026147539 |
| TCGA-HU-A4HD-01 | 0.058979263   | 0              | 0.07239645   | 0.069089186 | 0                 | 0.191032267                | 0.023583635                  | 0.020375006               | 0.079608786                | 0                   | 0                | 0.025371024        | 0.003227581 | 0.170345467    | 0.056563465    | 0.119130094    | 0.028269737             | 0                         | 0.073332238        | 0                    | 0           | 0.0086958   |             |
| TCGA-D7-8573-01 | 0.067521852   | 0              | 0.082815354  | 0.135313915 | 0                 | 0.207073761                | 0.062576016                  | 0.035782139               | 0.056925467                | 0                   | 0                | 0.013816117        | 0           | 0.085160626    | 0.064919047    | 0.089933745    | 0.024679101             | 0.033241973               | 0                  | 0                    | 0.000199393 | 0.040041494 |             |
| TCGA-BR-7959-01 | 0.07686446    | 0              | 0.019350521  | 0.077340631 | 0                 | 0.212275992                | 0.044540528                  | 0                         | 0.053328969                | 0                   | 0.032062475      | 0                  | 0.026595875 | 0.120245178    | 0.076482352    | 0.125343631    | 0.006818097             | 0.021653565               | 0.096613854        | 0.007452729          | 0           | 0.003031144 |             |
| TCGA-BR-8679-01 | 0             | 0              | 0.014661665  | 0.043538157 | 0                 | 0.151668109                | 0                            | 0.042561397               | 0                          | 0                   | 0.037931234      | 0                  | 0.170306018 | 0.077373286    | 0.28739574     | 0              | 0.117042332             | 0.027226838               | 0                  | 0.000573722          | 0.003338804 |             |             |
| TCGA-CG-5726-01 | 0.015340599   | 0              | 0.048920233  | 0.121467261 | 0                 | 0.264695357                | 0.076503151                  | 0.019710668               | 0.034726066                | 0                   | 0.029010017      | 0                  | 0.023521712 | 0.056562441    | 0.053968344    | 0.110836415    | 0.094093718             | 0.007085988               | 0                  | 0                    |             |             |             |

|                 |             |             |             |             |             |             |             |  |
|-----------------|-------------|-------------|-------------|-------------|-------------|-------------|-------------|--|
|                 | 0.031407514 | 0.012150515 |             |             |             |             |             |  |
| TCGA-BR-6453-01 | 0.160046327 | 0.020857498 | 0.087572634 | 0.143915965 | 0           | 0.097358735 |             |  |
|                 | 0.032211726 | 0.034572661 | 0.056851173 | 0           | 0           | 0.003641904 | 0.014197455 |  |
|                 | 0.03074542  | 0.142489837 | 0.063662203 | 0.040400328 | 0.062468073 | 0           | 0.009008061 |  |
|                 | 0           |             |             |             |             |             |             |  |
| TCGA-BR-A4QL-01 | 0           | 0.007798051 | 0           | 0.16394775  | 0           | 0.201970717 | 0.095239491 |  |
|                 | 0.053575319 | 0.024261755 | 0           | 0           | 0.097726754 | 0.013866435 | 0.105645344 |  |
|                 | 0.063682048 | 0.113161768 | 0.009471345 | 0.049653224 | 0           | 0           | 0           |  |
| TCGA-VQ-AA6A-01 | 0.025650637 | 0           | 0.061367795 | 0.061675279 | 0           | 0.299454175 | 0           |  |
|                 | 0.048929754 | 0.091461307 | 0           | 0           | 0.074377865 | 0.085160124 | 0.060929197 |  |
|                 | 0.077314719 | 0.069244673 | 0.006422986 | 0.038011488 | 0           | 0           | 0           |  |
| TCGA-HF-7132-01 | 0.027777312 | 0.040301726 | 0.102839789 | 0.164582624 | 0           | 0.187484898 |             |  |
|                 | 0.043071769 | 0.016298794 | 0.068857523 | 0           | 0.027039821 | 0           | 0.037781992 |  |
|                 | 0.066563316 | 0.110469388 | 0.066096548 | 0           | 0.012573414 | 0           | 0.024155842 |  |
|                 | 0.004105246 |             |             |             |             |             |             |  |
| TCGA-BR-A4IV-01 | 0.056943338 | 0           | 0.095998865 | 0.100735204 | 0           | 0.208753209 |             |  |
|                 | 0.015348486 | 0           | 0.04283728  | 0           | 0.021028502 | 0.019785091 | 0.016082489 |  |
|                 | 0.036796051 | 0.218595138 | 0.039416171 | 0.009830238 | 0.081803876 | 0.023365832 | 0           |  |
|                 | 0.012680228 |             |             |             |             |             |             |  |
| TCGA-CG-5718-01 | 0.006289367 | 0           | 0.107423524 | 0.076404863 | 0           | 0.180427268 |             |  |
|                 | 0.013443102 | 0           | 0.092345083 | 0           | 0.050983717 | 0.021360706 | 0.066702191 |  |
|                 | 0.057047437 | 0.084578792 | 0.056226979 | 0.03223375  | 0           | 0.073671212 | 0           |  |
|                 | 0.080862007 |             |             |             |             |             |             |  |
| TCGA-BR-8296-01 | 0.17336462  | 0           | 0.07064701  | 0.149584076 | 0           | 0.198019876 |             |  |
|                 | 0.037198519 | 0           | 0.112966248 | 0           | 0.004767136 | 0.006134692 | 0.025052767 |  |
|                 | 0.04493578  | 0.084849845 | 0.002108795 | 0.051594153 | 0.036547065 | 0.002229418 | 0           |  |
|                 | 0           |             |             |             |             |             |             |  |
| TCGA-R5-A7ZR-01 | 0.016295701 | 0           | 0.169951782 | 0.026390127 | 0           | 0.309535758 | 0           |  |
|                 | 0.092624632 | 0           | 0           | 0.007903266 | 0.025360388 | 0.038020973 | 0.170093638 |  |
|                 | 0.048259865 | 0           | 0.095563869 | 0           | 0           |             |             |  |
| TCGA-VQ-A8P2-01 | 0.083258567 | 0           | 0.048082868 | 0.115031382 | 0           | 0.285517295 |             |  |
|                 | 0.030887374 | 0.060609093 | 0.041444882 | 0           | 0           | 0.040911887 | 0.137334087 |  |
|                 | 0.039502681 | 0.109906227 | 0           | 0.007513657 | 0           | 0           | 0           |  |
| TCGA-RD-A8N2-01 | 0.081581326 | 0           | 0           | 0.150358936 | 0           | 0.235041129 | 0.001728166 |  |
|                 | 0.043377349 | 0           | 0           | 0.025402101 | 0.031382916 | 0.045216122 | 0.182535723 |  |
|                 | 0.075908066 | 0.012895604 | 0.114572562 | 0           | 0           | 0           |             |  |
| TCGA-HU-A4GT-01 | 0.049160432 | 0           | 0.057350433 | 0.100883801 | 0           | 0.211428028 |             |  |
|                 | 0.0804622   | 0.03518786  | 0.09142382  | 0           | 0.000157038 | 0.004748361 | 0           |  |
|                 | 0.161754293 | 0.065194227 | 0.104843278 | 0.000754447 | 0.005552021 | 0.010011414 | 0           |  |
|                 | 0           | 0.021088349 |             |             |             |             |             |  |
| TCGA-ZA-A8F6-01 | 0.060325605 | 0           | 0.000680757 | 0.085260762 | 0           | 0.135655675 | 0           |  |
|                 | 0.003416268 | 0.050345872 | 0           | 0           | 0.033271976 | 0.011296477 | 0.166034735 |  |
|                 | 0.020826676 | 0.202654692 | 0.092366265 | 0.004183378 | 0.133680861 | 0           | 0           |  |
| TCGA-D7-A74A-01 | 0           | 0.046311129 | 0.075894578 | 0.186213531 | 0           | 0.192303558 |             |  |



0.022448606

TCGA-FP-8211-01 0.101767336 0 0.062482006 0.145436507 0 0.308221035  
0.012980266 0.020220214 0.080715414 0 0 0.012749097 0.004176537  
0.032892136 0.068924569 0.067903865 0.042145118 0.027881606 0.010604291  
0.000900003 0 0

TCGA-D7-A747-01 0.117408701 0.037927596 0.013649483 0.136011367 0 0.216832987  
0.005955148 0.013153195 0.090636794 0 0 0.030985773 0 0 0.056977931  
0.111558215 0.045406875 0.025948647 0.097547288 0 0 0

TCGA-KB-A93G-01 0.047536738 0 0.013741128 0.007471761 0 0.29768413 0  
0.007961733 0.01087182 0 0.050367428 0 0.031939067 0.09829476  
0.027426576 0.109945949 0.004055682 0.064037804 0 0.100044333 0.026221162  
0.102399931

TCGA-RD-A8MV-01 0.071062325 0 0.104153005 0.114377758 0 0.168362639  
0.065249251 0.026092553 0.059190767 0 0.038460642 0 0.019692244  
0.095352725 0.060689187 0.085621823 0 0.034406015 0.003428764 0 0  
0.053860304

TCGA-BR-4256-01 0.002511977 0 0.058768771 0.058915115 0 0.168885996  
0.001840102 0.052786422 0.002628072 0 0.033123802 0.027168403 0.101329085  
0.013545253 0.06591646 0.159364821 0 0.077206839 0.054304301 0  
0.034857271 0.086847311

TCGA-FP-7735-01 0.041653857 0.010055956 0.08349106 0.178887845 0 0.159436058  
0.046919528 0.009449101 0.095476924 0 0 0.016956462 0.014235706  
0.06682088 0.066481971 0.12786109 0.04761867 0 0.034654892 0 0 0

TCGA-VQ-A8PK-01 0.087873457 0 0.071908888 0.045104074 0 0.227227857  
0.013442875 0.047811586 0.040345286 0 0.0063465 0.061533818 0  
0.117392778 0.06766391 0.105667766 0 0.061986813 0.045694392 0 0 0

TCGA-BR-7707-01 0 0 0.073027224 0.137020953 0 0.177867188 0.108160457  
0.046521835 0.030861489 0 0.016821406 0.02466214 0.000520372 0.07047195  
0.088624215 0.113535816 0 0.049992279 0 0.023269041 0 0.038643636

TCGA-IN-A6RS-01 0.043741248 0 0.086625824 0.159282879 0 0.150287235  
0.083148321 0.032179451 0.05609107 0 0 0.013321872 0 0.122002834  
0.043657753 0.096403304 0.005078351 0.02887646 0 0.044855939 0  
0.034447459

TCGA-D7-6519-01 0.027460263 0 0 0.180241131 0 0.129649043 0 0.027644673  
0.065685666 0 0 0.124811193 0.011809522 0.037902463 0.051132278  
0.159872846 0.035612798 0.009497443 0.138680682 0 0 0

TCGA-CG-4440-01 0 0.00860838 0 0 0 0.250588925 0 0.023310307 0  
0.026077333 0.002077185 0.031193617 0 0.028754963 0.083172098 0.219976542  
0.002438071 0.052233082 0.097008928 0 0.035920969 0.1386396

TCGA-BR-8487-01 0 0.014985806 0.09121689 0.096640265 0 0.150233094  
0.042114738 0.02777845 0.038248421 0.041734725 0 0.042286841 0  
0.161013345 0.085986295 0.148887921 0.012207723 0 0.046269237 0 0  
0.000396249

TCGA-CG-5717-01 0.098126036 0 0.023612471 0.125590756 0 0.190093843



|                 |             |             |             |             |             |             |                         |
|-----------------|-------------|-------------|-------------|-------------|-------------|-------------|-------------------------|
| TCGA-IN-A6RL-01 | 0.051814049 | 0           | 0.115152654 | 0.08747474  | 0           | 0.223094724 | 0                       |
|                 | 0.035642096 | 0.056947484 | 0           | 0           | 0.023196323 | 0.020406513 | 0.039832111             |
|                 | 0.076776086 | 0.12332614  | 0.066977905 | 0.002771013 | 0.06368616  | 0           | 0                       |
|                 | 0.012902001 |             |             |             |             |             |                         |
| TCGA-CG-5732-01 | 0.070413867 | 0           | 0.177951171 | 0.196761929 | 0           | 0.13553767  |                         |
|                 | 0.04375195  | 0.013923669 | 0.078881503 | 0           | 0           | 0           | 0.038839067 0.037388215 |
|                 | 0.106086506 | 0.051029034 | 0.013594794 | 0           | 0.015399234 | 0           | 0.020441391             |
| TCGA-RD-A8MW-01 | 0.021451082 | 0           | 0.148811578 | 0.120142885 | 0           | 0.118965918 |                         |
|                 | 0.082271844 | 0.005695668 | 0.056810336 | 0           | 0.001988912 | 0           | 0.025908744             |
|                 | 0.125448884 | 0.079766234 | 0.136564826 | 0           | 0.023120201 | 0           | 0.023177856             |
|                 | 0.008441633 | 0.021433397 |             |             |             |             |                         |
| TCGA-KB-A6F7-01 | 0.055004729 | 0           | 0.061797316 | 0.217291348 | 0           | 0.087834202 |                         |
|                 | 0.078435545 | 0.020614723 | 0.085069327 | 0           | 0.016981338 | 0.014201191 | 0.020328793             |
|                 | 0.074636507 | 0.058499431 | 0.119785768 | 0.054064738 | 0.014069135 | 0.013588626 | 0                       |
|                 | 0.003765804 | 0.00403148  |             |             |             |             |                         |
| TCGA-BR-8382-01 | 0.002604675 | 0           | 0.112774562 | 0.081171675 | 0           | 0.155945062 |                         |
|                 | 0.051725039 | 0.021122184 | 0.036449652 | 0           | 0.01190211  | 0.059729545 | 0                       |
|                 | 0.073842479 | 0.099947904 | 0.151393206 | 0.031071918 | 0.015247579 | 0.049688938 | 0                       |
|                 | 0           | 0.045383472 |             |             |             |             |                         |
| TCGA-BR-8060-01 | 0.011131697 | 0           | 0.13835506  | 0.053511903 | 0           | 0.222856924 |                         |
|                 | 0.042998089 | 0.002785459 | 0.0328723   | 0           | 0           | 0.039830067 | 0.03650437              |
|                 | 0.131955104 | 0.074727394 | 0.123867388 | 0.030417382 | 0.024056344 | 0.011924021 |                         |
|                 | 0.002170652 | 0.002321151 | 0.017714694 |             |             |             |                         |
| TCGA-HU-A4GF-01 | 0.024276099 | 0           | 0.091593249 | 0.005899773 | 0           | 0.212972488 |                         |
|                 | 0.002281037 | 0           | 0.0051646   | 0           | 0.082729458 | 0.041830909 | 0.170647684             |
|                 | 0.08453566  | 0.05692687  | 0.012137846 | 0.0764466   | 0.018440862 | 0           | 0                       |
|                 | 0.114116865 |             |             |             |             |             |                         |
| TCGA-R5-A7ZI-01 | 0.028977794 | 0           | 0.115245474 | 0.195453166 | 0           | 0.088600046 |                         |
|                 | 0.066171244 | 0.05608832  | 0.08094686  | 0           | 0.016355737 | 0           | 0.03717492              |
|                 | 0.046709814 | 0.144937936 | 0.030193532 | 0.058514955 | 0.020328042 | 0.007955362 | 0                       |
|                 | 0.006346797 |             |             |             |             |             |                         |
| TCGA-BR-8588-01 | 0.092449793 | 0           | 0.014967827 | 0.191314385 | 0           | 0.123875387 |                         |
|                 | 0.020438573 | 0.028902588 | 0.070127428 | 0           | 0           | 0.025700881 | 0.085421708             |
|                 | 0.061309002 | 0.102957159 | 0.031217377 | 0.01407429  | 0.079416373 | 0           | 0.011340974             |
|                 | 0.046486255 |             |             |             |             |             |                         |
| TCGA-CD-5801-01 | 0           | 0.034600097 | 0.065762669 | 0.305906895 | 0           | 0.049870786 |                         |
|                 | 0.069412407 | 0.008823482 | 0.066432877 | 0           | 0.009318534 | 0.03277595  | 0.018310413             |
|                 | 0           | 0.108026523 | 0.141357247 | 0.063944074 | 0           | 0.019697669 | 0                       |
|                 |             |             |             |             |             |             | 0.005760376             |
| TCGA-CD-5800-01 | 0.154326239 | 0           | 0.054375948 | 0.109570187 | 0           | 0.165113015 |                         |
|                 | 0.025681688 | 0.059763471 | 0.055956372 | 0           | 0           | 0.010582194 | 0.020258 0.144005201    |
|                 | 0.047258253 | 0.09132801  | 0.009565822 | 0.051505615 | 0           | 0           | 0.000709986             |
| TCGA-CG-4462-01 | 0           | 0           | 0.030320701 | 0.013432305 | 0           | 0.253429392 | 0                       |
|                 | 0.072504619 | 0           | 0.058127206 | 0           | 0.006192999 | 0.19351711  | 0.040871158             |
|                 | 0.073544726 | 0           | 0.087048204 | 0.035048565 | 0.135963015 |             |                         |

|                 |             |             |             |             |             |             |             |             |
|-----------------|-------------|-------------|-------------|-------------|-------------|-------------|-------------|-------------|
| TCGA-CD-8530-01 | 0.071761983 | 0           | 0.002724723 | 0.131158703 | 0           | 0.168898432 |             |             |
|                 | 0.010170011 | 0           | 0.124980602 | 0           | 0           | 0.003280987 | 0.055375451 | 0.035934719 |
|                 | 0.141125614 | 0.097928555 | 0.026163657 | 0.085292938 | 0.045203623 | 0           | 0           |             |
| TCGA-VQ-A8PX-01 | 0.044500855 | 0           | 0.137642067 | 0.157545701 | 0           | 0.291153142 |             |             |
|                 | 0.037239494 | 0           | 0.085663408 | 0           | 0.005631936 | 0           | 0.007595724 | 0.059963078 |
|                 | 0.046218234 | 0.054462536 | 0.015628518 | 0.01720143  | 0.009506015 | 0           | 0.030047862 |             |
| TCGA-D7-8578-01 | 0.108121597 | 0           | 0.079570069 | 0.133679812 | 0           | 0.193062821 | 0           |             |
|                 | 0.024290186 | 0.076762463 | 0           | 0           | 0.037618802 | 0           | 0.037477969 | 0.042473789 |
|                 | 0.153087141 | 0.022054015 | 0.019122225 | 0.059079079 | 0           | 0           | 0.013600032 |             |
| TCGA-BR-6458-01 | 0.020212709 | 0           | 0.036132719 | 0.186764631 | 0           | 0.094451177 | 0           |             |
|                 | 0.055430858 | 0.013404353 | 0           | 0           | 0.101338678 | 0.039910064 | 0.065002205 |             |
|                 | 0.104674276 | 0.149511477 | 0.073062068 | 0           | 0.050184561 | 0           | 0.009920224 | 0           |
| TCGA-VQ-A8PB-01 | 0.031664166 | 0           | 0.083898277 | 0.158887473 | 0           | 0.18040063  |             |             |
|                 | 0.026040762 | 0.032856439 | 0.022925103 | 0           | 0           | 0.027645156 | 0.00183129  |             |
|                 | 0.11424015  | 0.048066522 | 0.080582989 | 0           | 0.006706053 | 0           | 0.140874637 |             |
|                 | 0.01478329  | 0.028597063 |             |             |             |             |             |             |
| TCGA-D7-6822-01 | 0.037671893 | 0           | 0           | 0.164663224 | 0           | 0.259183055 | 0.02231479  |             |
|                 | 0.007264431 | 0.031163012 | 0           | 0.03183849  | 0.019675296 | 0.01144569  | 0.073768214 |             |
|                 | 0.093918297 | 0.076514365 | 0.067031607 | 0           | 0.00271574  | 0           | 0           | 0.100831896 |
| TCGA-BR-8284-01 | 0.04042314  | 0           | 0.049572781 | 0.181470587 | 0           | 0.195064895 |             |             |
|                 | 0.023912089 | 0.011884144 | 0.004210139 | 0           | 0           | 0.091389013 | 0.018660526 |             |
|                 | 0.0145193   | 0.076815427 | 0.156607439 | 0.055927119 | 0.015224432 | 0.06431897  | 0           |             |
|                 | 0           | 0           |             |             |             |             |             |             |
| TCGA-3M-AB47-01 | 0.13958414  | 0           | 0.101894589 | 0.074259928 | 0           | 0.410827093 | 0           | 0           |
|                 | 0.043204806 | 0.002679603 | 0           | 0           | 0           | 0.03210713  | 0.042893078 | 0.123343013 |
|                 | 0.021942401 | 0.00726422  | 0           | 0           | 0           |             |             |             |
| TCGA-BR-8381-01 | 0.057851106 | 0           | 0.106573673 | 0.169765214 | 0           | 0.109781641 |             |             |
|                 | 0.094377175 | 0.045236738 | 0.061111516 | 0           | 0           | 0.015037809 | 0.004533874 |             |
|                 | 0.085402738 | 0.066372899 | 0.110003457 | 0.02396333  | 0.023002379 | 0.026986449 | 0           |             |
|                 | 0           | 0           |             |             |             |             |             |             |
| TCGA-BR-4191-01 | 0.040044765 | 0           | 0.064345159 | 0.105028947 | 0           | 0.14268947  |             |             |
|                 | 0.067183651 | 0.012928034 | 0.041463241 | 0           | 0.025707327 | 0           | 0.043983943 |             |
|                 | 0.025471428 | 0.055058834 | 0.156382667 | 0.10689349  | 0.005182439 | 0.026781757 | 0           |             |
|                 | 0.061356915 | 0.019497932 |             |             |             |             |             |             |
| TCGA-MX-A666-01 | 0.275725111 | 0           | 0.156900667 | 0.03338124  | 0           | 0.188852764 |             |             |
|                 | 0.018604391 | 0.063072265 | 0.069238117 | 0           | 0.002552604 | 0           | 0           | 0.038159743 |
|                 | 0.004008256 | 0.052017208 | 0.008751104 | 0.034566497 | 0.035157491 | 0.018701266 | 0           |             |
|                 | 0.000311276 |             |             |             |             |             |             |             |
| TCGA-CD-A486-01 | 0.041027458 | 0           | 0.112003917 | 0.076906075 | 0           | 0.143358932 | 0           |             |
|                 | 0.037292348 | 0.066558745 | 0           | 0           | 0.046188978 | 0           | 0.13612358  | 0.0560552   |
|                 | 0.208489799 | 0           | 0.040398874 | 0.001847476 | 0           | 0           | 0.03374862  |             |
| TCGA-BR-8077-01 | 0.001608466 | 0           | 0.059223404 | 0.140518461 | 0           | 0.203247057 |             |             |
|                 | 0.076805666 | 0           | 0.067475887 | 0           | 0           | 0.028934796 | 0.018808291 | 0.062923261 |
|                 | 0.080422842 | 0.099496542 | 0.081472581 | 0.025067768 | 0.035536408 | 0           | 0.007769863 |             |

0.010688707

TCGA-MX-A663-01 0.145436134 0 0 0.090251215 0 0.196407288 0 0.037020848  
0.054697888 0 0 0.032786919 0.007275663 0.133748776 0.074850805  
0.109615117 0.039205708 0 0.03931478 0.03938886 0 0

TCGA-R5-A7O7-01 0.057404711 0 0.068984857 0.008991976 0 0.373160978  
0.05198952 0 0.044709208 0 0.05357545 0 0.016271377 0.018884747  
0.051722433 0.034264148 0 0.062951227 0 0.102518961 0 0.054570406

TCGA-VQ-A8DZ-01 0.052697218 0 0.076481327 0.06924676 0 0.236045491  
0.042293015 0 0.058310748 0 0.00974894 0 0.007725747 0.118835965  
0.058707122 0.091820696 0.032872475 0.021343838 0.047298919 0.017640012 0  
0.058931728

TCGA-BR-A44T-01 0.195993747 0.068135532 0.042125832 0.133108468 0 0.167675313  
0.034142417 0.032320172 0.050828912 0 0 0.027788369 0.013688619  
0.038981789 0.052186494 0.067333798 0.023861965 0.010617657 0.024308367 0  
0.016902547 0

TCGA-HU-A4H6-01 0.130352645 0 0.137854022 0.077803727 0 0.164817405  
0.041084342 0.05761344 0.019107407 0 0 0.023694489 0 0.025292936  
0.058268841 0.065037236 0.039694414 0.026701897 0.066922694 0 0  
0.065754506

TCGA-BR-A4CS-01 0.050992341 0 0.045951989 0.028590735 0 0.276824099  
0.000361733 0.021692521 0.032514709 0 0 0 0.027113085 0.168894699  
0.038681713 0.072835496 0 0.067247235 0 0.076133591 0 0.092166054

TCGA-CG-4438-01 0 0.009222435 0.010826607 0.102061628 0 0.148495312  
0.111451569 0.035016214 0.021779689 0.048823432 0 0.018172913 0  
0.13474762 0.103617657 0.189715862 0 0 0.047041392 0 0.011094425  
0.007933248

TCGA-RD-A7BW-01 0.038199906 0 0.024532539 0.300397911 0 0.123639045  
0.024889752 0.02230953 0.043093295 0 0 0.047024615 0.033500624 0  
0.07784533 0.149238736 0.037419534 0.01778778 0.052264021 0 0.007857384  
0

TCGA-D7-8570-01 0.023143332 0 0.091016478 0.106005672 0 0.077041938  
0.039513475 0.047831945 0.049850239 0 0 0.076569995 0 0.090821214  
0.071445051 0.13523172 0.118925531 0.014276339 0.05832707 0 0 0

TCGA-BR-4368-01 0.055795174 0 0.038331775 0.067583039 0 0.257790846  
0.045071416 0.033381955 0 0 0 0.031527196 0.036360252 0.023257215  
0.077927088 0.144302486 0.027726512 0.032656093 0.042132785 0 0.071100612  
0.015055557

TCGA-CG-5720-01 0.021061431 0 0.074282961 0.112508785 0 0.16587568  
0.017524798 0 0.087244382 0 0.015370258 0 0.048316403 0.083826078  
0.061374836 0.092151728 0.007013817 0.029739363 0.070083359 0.036490952  
0.000279633 0.076855537

TCGA-D7-8579-01 0.054324392 0 0.03536095 0.067902984 0 0.224152161  
0.00222255 0 0.058588411 0 0 0 0.018211266 0.003927381 0.020621853  
0.135021222 0.088262351 0.01634823 0.139521493 0.005481847 0.072875412

0.057177496

TCGA-IN-A6RO-01 0.042339377 0 0.066776632 0 0 0.371511695 0.053187947 0  
0.080852842 0 0.040322473 0.01011159 0.003269664 0.045261342 0.090093907  
0.096954852 0.02366458 0.040254448 0.035398652 0 0 0

TCGA-VQ-AA69-01 0.029557438 0 0.032696262 0.19044478 0 0.081240868  
0.110365715 0.109142533 0 0 0.054900929 0 0.042840859 0.065120543  
0.095268406 0.144683826 0 0.000841912 0.011974101 0 0.030921829 0

TCGA-IP-7968-01 0.052063902 0 0.012513629 0.209929127 0 0.203434923  
0.029349276 0.107939653 0.038295804 0 0 0.034947536 0.023477824  
0.061001445 0.087668172 0.105976119 0 0.009429049 0.023973542 0 0 0

TCGA-BR-8371-01 0.258523915 0.000154 0.03093266 0.121798054 0 0.224186872  
0.016844093 0 0.098701202 0 0 0 0.005305673 0.031034007 0.036313281  
0.095922879 0.002927766 0.042307523 0.035048073 0 0 0

TCGA-KB-A93J-01 0 0.003279257 0.057221518 0.050039132 0 0.203196367  
0.031414052 0.014752966 0.091724677 0.009894989 0 0.054529203 0.000438199  
0.138595749 0.086558879 0.167159661 0.048955474 0 0.042239875 0 0 0

TCGA-D7-A4YU-01 0.094041804 0 0.112343514 0.104492 0 0.137972661 0.100356254  
0.011741661 0.055582957 0 0.002057117 0.014048602 0.007057127 0.033420456  
0.091305737 0.110770953 0.048382583 0.022718312 0.046930351 0 0  
0.006777911

TCGA-BR-6705-01 0.061623051 0 0.091415462 0.153657992 0 0.151017819  
0.029802935 0 0.096113012 0 0.018193784 0 0.023394117 0.029026111  
0.068050803 0.123997793 0.056724696 0.022064777 0.074917646 0 0 0

TCGA-BR-6803-01 0.062549837 0 0.105725154 0.210081463 0 0.17019982  
0.023867416 0 0.088904773 0 0 0.007853821 0.005278129 0.016785576  
0.05948755 0.137666176 0.035347939 0.001399804 0.0686817 0 0.006170842  
0

TCGA-D7-A6EX-01 0.170077883 0 0.082895657 0.087528243 0 0.204297803  
0.024847729 0.039174886 0.080376721 0 0 0.01466673 0.003064445  
0.008375239 0.069136738 0.08888119 0.036914023 0 0.089762713 0 0 0

TCGA-BR-6564-01 0.076500842 0 0.031514882 0.181238845 0 0.196610011  
0.031990464 0.004522767 0.068309752 0 0 0.014887197 0.052819278 0  
0.063373583 0.14922919 0.042713483 0.019978318 0.066311387 0 0 0

TCGA-D7-A4YX-01 0.012710871 0 0 0.115891672 0 0.171393788 0.018742997  
0.091510048 0.032300852 0 0.026505121 0.082253984 0.022424961 0.024727093  
0.128733384 0.150685903 0.024760313 0.070982152 0.019925168 0 0.00645169  
0

TCGA-CG-4441-01 0.051757786 0 0.10215711 0.060682085 0 0.227192197  
0.032959295 0.004738832 0.055058766 0 0 0.02778998 0.004498378  
0.130796459 0.0719506 0.122124618 0 0.006742841 0 0.022882807 0  
0.078668246

TCGA-VQ-A8DV-01 0.109816385 0 0.014543581 0.13053068 0 0.143464178 0  
0.034384485 0.027007136 0 0 0.013017681 0.006626758 0.229185795  
0.058182271 0.09360667 0 0.025539088 0.055301351 0.011101588 0

0.047692353

TCGA-CG-5719-01 0 0.010384271 0.115241698 0.045693551 0 0.277993575 0 0  
0.087865774 0 0.007096215 0.021729216 0.033003283 0.12879213 0.036328612  
0.124703026 0.024997137 0.020095377 0.029319948 0 0 0.036756186

TCGA-HU-A4GX-01 0.023849951 0 0.113988263 0.197915021 0 0.085429662  
0.047995678 0.06064577 0.057128494 0 0 0.0915478 0.012447809 0  
0.074383404 0.127577236 0 0.032597958 0.058985002 0 0 0.015507953

TCGA-BR-8483-01 0.13026036 0 0.032423555 0.031808344 0 0.157789455  
0.005087067 0.029701127 0.072890737 0 0 0.076484118 0.007974853  
0.208638548 0.094477201 0.076812684 0.022900785 0.002404707 0.050346459 0  
0 0

TCGA-VQ-A8PC-01 0.061843785 0.030631578 0.097287034 0.059490742 0 0.254195902  
0.014575216 0 0.03711578 0 0.005967254 0.005590593 0.006807541  
0.007492097 0.047219887 0.161050739 0.071918417 0.022262354 0.074412224 0  
0.018538683 0.023600173

TCGA-CD-8526-01 0.137778997 0 0.124854718 0.116959835 0 0.140105441  
0.053691037 0.046173673 0.071640411 0 0 0.009225226 0.004817255  
0.050805533 0.058295499 0.0687884 0.061089438 0.035634412 0.020140127 0  
0 0

TCGA-BR-8380-01 0.089671387 0 0.070423026 0.111037912 0 0.190178872  
0.012249815 0.028764616 0.037144958 0 0 0.009643136 0.030860813  
0.092436824 0.062372771 0.118834143 0.051037804 0 0.095343922 0 0 0

TCGA-VQ-A8PQ-01 0.161402677 0.046412522 0.032587455 0.132095486 0 0.213874373  
0.038721805 0.008127818 0.115974306 0 0 0 0 0.054670042 0.06122147  
0.088945191 0.00785504 0.023931999 0.013656012 0 0.000523804 0

TCGA-BR-8291-01 0.041101403 0 0.016298473 0.199549459 0 0.14848538  
0.019898686 0.007990949 0.049044469 0 0 0.029107146 0.040605705  
0.000992406 0.038973652 0.180823849 0.095838965 0.00859009 0.089271696 0  
0.033427672 0

TCGA-HU-A4GQ-01 0.069738255 0 0.004124904 0.139519859 0 0.109120718  
0.058885035 0.05333027 0.05055901 0 0 0.042532044 0.002433177  
0.046978041 0.084315969 0.152078062 0.022099015 0.066934246 0.068920026 0  
0.014215153 0.014216216

TCGA-BR-8081-01 0.105409454 0 0.066229696 0.039448915 0 0.111355791  
0.094515702 0.067806346 0.035979237 0 0 0.067153273 0.009798421  
0.042840409 0.08336105 0.132836953 0.03626541 0.044545735 0.056766475 0  
0 0.005687133

TCGA-HU-A4H4-01 0.052537171 0 0.044545713 0.110495589 0 0.191308975  
0.066208691 0.084591324 0 0 0.002265736 0.035623163 0.006057958  
0.059890948 0.080368764 0.109488158 0 0.100810872 0.002826807 0 0  
0.05298013

TCGA-VQ-A91K-01 0.006276897 0 0 0.117705804 0 0.239241088 0 0.056718779  
0.086516173 0 0 0.050983743 0.000878568 0.118076598 0.068950476  
0.166790843 0.012609089 0.020447618 0.046043552 0 0 0.008760773

|                 |             |             |             |             |             |             |             |             |
|-----------------|-------------|-------------|-------------|-------------|-------------|-------------|-------------|-------------|
| TCGA-BR-4367-01 | 0.02908023  | 0           | 0.056429766 | 0.082491127 | 0           | 0.183604613 |             |             |
|                 | 0.072004608 | 0           | 0.049992321 | 0.015260111 | 0           | 0.013020035 | 0           | 0.12700203  |
|                 | 0.080936402 | 0.151607793 | 0           | 0.015223132 | 0.04134288  | 0           | 0.032922429 |             |
|                 | 0.049082525 |             |             |             |             |             |             |             |
| TCGA-BR-8297-01 | 0.106803605 | 0.000139623 | 0.078146562 | 0.093585151 | 0           | 0.213640257 |             |             |
|                 | 0.035450803 | 0.017694609 | 0.045983315 | 0           | 0           | 0.04200028  | 0.001279969 |             |
|                 | 0.040032411 | 0.080075184 | 0.077339426 | 0.025414852 | 0.006968611 | 0.13544534  | 0           |             |
|                 | 0           | 0           |             |             |             |             |             |             |
| TCGA-BR-8687-01 | 0.068619144 | 0           | 0.080220144 | 0.025554866 | 0           | 0.296489599 |             |             |
|                 | 0.00241883  | 0.018839373 | 0.019247454 | 0           | 0           | 0.023423719 | 0           | 0.044155281 |
|                 | 0.061297077 | 0.169751526 | 0.128639584 | 0           | 0.061343402 | 0           | 0           | 0           |
| TCGA-BR-8683-01 | 0.121307699 | 0           | 0           | 0.155195623 | 0           | 0.16600902  | 0.029160753 |             |
|                 | 0.041030087 | 0.096721004 | 0           | 0           | 0.008535916 | 0           | 0.115039625 | 0.075682548 |
|                 | 0.077821351 | 0.090206478 | 0.008861793 | 0.014428104 | 0           | 0           | 0           |             |
| TCGA-F1-A72C-01 | 0.095927589 | 0           | 0.112445279 | 0.144687707 | 0           | 0.151520672 |             |             |
|                 | 0.009417944 | 0.058462735 | 0.050021243 | 0           | 0           | 0.04114458  | 0.001120122 |             |
|                 | 0.095774134 | 0.066770595 | 0.123778486 | 0           | 0.018366272 | 0.030562642 | 0           | 0           |
| TCGA-VQ-A8PM-01 | 0.065186146 | 0.038889859 | 0.163931794 | 0.033881422 | 0           | 0.307975229 |             |             |
|                 | 0.011684381 | 0.028617932 | 0.061497373 | 0           | 0           | 0.00218308  | 0           | 0.019160517 |
|                 | 0.048097577 | 0.078414517 | 0.055861278 | 0.02065279  | 0.063966105 | 0           | 0           | 0           |
| TCGA-VQ-A925-01 | 0.126835503 | 0           | 0.048823338 | 0.180462106 | 0           | 0.352577393 |             |             |
|                 | 0.0217334   | 0.005891057 | 0.046738607 | 0           | 0           | 0.01058193  | 0.008697953 |             |
|                 | 0.026599479 | 0.050245087 | 0.063437991 | 0.030971904 | 0.011712434 | 0.014691818 | 0           |             |
|                 | 0           | 0           |             |             |             |             |             |             |
| TCGA-IN-7808-01 | 0.222495399 | 0           | 0.06763116  | 0.095103551 | 0           | 0.256861049 |             |             |
|                 | 0.037286743 | 0.071032005 | 0.048078485 | 0           | 0.007973634 | 0           | 0.013669078 |             |
|                 | 0.003772875 | 0.070666904 | 0.092290025 | 0           | 0           | 0           | 0.00889951  | 0.004239582 |
| TCGA-HU-A4G8-01 | 0.107365317 | 0.004155653 | 0.068509105 | 0.106545716 | 0           | 0.208127042 |             |             |
|                 | 0.081153379 | 0.077515898 | 0.008429982 | 0           | 0.006379904 | 0.007797391 | 0           |             |
|                 | 0.074053137 | 0.091877499 | 0.103561677 | 0.025052844 | 0.025878913 | 0.003596546 | 0           |             |
|                 | 0           | 0           |             |             |             |             |             |             |
| TCGA-CD-A48A-01 | 0.094616184 | 0           | 0.062129263 | 0.134074149 | 0           | 0.04828775  |             |             |
|                 | 0.019057369 | 0.050720048 | 0.086345789 | 0           | 0.00088024  | 0.007766474 | 0           |             |
|                 | 0.19371709  | 0.067814376 | 0.182053108 | 0.034366083 | 0           | 0           | 0.007471845 |             |
|                 | 0.01070023  | 0           |             |             |             |             |             |             |
| TCGA-B7-A5TJ-01 | 0.051662317 | 0           | 0.022379612 | 0.05970763  | 0           | 0.294116209 | 0           |             |
|                 | 0.00380017  | 0.065702521 | 0           | 0           | 0.013995305 | 0.010203229 | 0.144760515 |             |
|                 | 0.05946656  | 0.147462669 | 0.089069511 | 0           | 0.037673753 | 0           | 0           | 0           |
| TCGA-IN-8462-01 | 0           | 0.051572845 | 0.081516856 | 0.004155231 | 0           | 0.264031379 | 0           | 0           |
|                 | 0.10797865  | 0           | 0           | 0           | 0.072617268 | 0.099486747 | 0.088645872 | 0.101018007 |
|                 | 0.008277933 | 0.114467173 | 0           | 0           | 0.006232037 |             |             |             |
| TCGA-BR-4294-01 | 0           | 0           | 0.054147875 | 0.110741689 | 0           | 0.211454438 | 0.042793386 | 0           |
|                 | 0           | 0.020284072 | 0           | 0           | 0.089581891 | 0           | 0.011887997 | 0.191618959 |
|                 | 0.026375838 | 0           | 0.018042026 | 0.184868121 | 0.035982855 |             |             |             |

|                 |             |             |             |             |             |             |             |             |
|-----------------|-------------|-------------|-------------|-------------|-------------|-------------|-------------|-------------|
| TCGA-BR-A4J4-01 | 0.017196475 | 0           | 0           | 0.074685804 | 0           | 0.301075791 | 0           | 0.038384293 |
|                 | 0.005225311 | 0.042173073 | 0           | 0.042514706 | 0.001824992 | 0.040813043 | 0.153593358 |             |
|                 | 0.115214545 | 0.145069017 | 0           | 0           | 0.017269681 | 0           | 0.004959912 |             |
| TCGA-IN-7806-01 | 0.053355839 | 0.102149161 | 0.009025649 | 0.064478148 | 0           | 0.151974084 |             |             |
|                 | 0.012953905 | 0           | 0.080209105 | 0           | 0.025869276 | 0           | 0           | 0.206683015 |
|                 | 0.226637549 | 0           | 0.008090725 | 0.031286536 | 0           | 0           | 0.002833499 |             |
| TCGA-VQ-AA6F-01 | 0.073018275 | 0.061640085 | 0.144265932 | 0.115813065 | 0           | 0.137741174 |             |             |
|                 | 0.017785462 | 0.033688671 | 0.081437813 | 0           | 0           | 0.027419843 | 0           | 0.083481214 |
|                 | 0.075300609 | 0.052752368 | 0           | 0.022721268 | 0.072934224 | 0           | 0           | 0           |
| TCGA-BR-A4J8-01 | 0.040088381 | 0.013735534 | 0.019775542 | 0.098810765 | 0           | 0.227261997 |             |             |
|                 | 0           | 0           | 0.080251204 | 0           | 0           | 0.118153188 | 0.006076759 | 0.071729187 |
|                 | 0.105846121 | 0.012781958 | 0           | 0.121067508 | 0           | 0           | 0           | 0.084421856 |
| TCGA-BR-6707-01 | 0.016452509 | 0           | 0.09270162  | 0.252473104 | 0           | 0.078038418 |             |             |
|                 | 0.055322429 | 0.056189048 | 0.070553845 | 0           | 0           | 0.046713433 | 0.016543991 |             |
|                 | 0.094189061 | 0.070093239 | 0.095697496 | 0.006204898 | 0.014926655 | 0.033900255 | 0           |             |
|                 | 0           | 0           |             |             |             |             |             |             |
| TCGA-HU-A4GC-01 | 0.098859606 | 0           | 0.080625418 | 0.151744114 | 0           | 0.206593812 |             |             |
|                 | 0.053976191 | 0.0082596   | 0.058642922 | 0           | 0           | 0.003331524 | 0           | 0.034101848 |
|                 | 0.066429617 | 0.116670121 | 0.067620904 | 0           | 0.05061128  | 0           | 0           | 0.002533041 |
| TCGA-BR-8682-01 | 0.032057377 | 0.018421906 | 0           | 0.030755266 | 0           | 0.203801921 | 0           |             |
|                 | 0.008654059 | 0.048410749 | 0           | 0           | 0.069251622 | 0           | 0.104510778 | 0.046676238 |
|                 | 0.162694859 | 0.129392152 | 0           | 0.145373074 | 0           | 0           | 0           |             |
| TCGA-HU-A4H0-01 | 0           | 0           | 0.075414321 | 0.04803295  | 0           | 0.275436255 | 0.080076313 |             |
|                 | 0.03980503  | 0.005073101 | 0.016824439 | 0           | 0.081177521 | 0.004933001 | 0.014744082 |             |
|                 | 0.089854692 | 0.131122315 | 0.018195    | 0.041351745 | 0.077959235 | 0           | 0           | 0           |
| TCGA-BR-8677-01 | 0.008300241 | 0           | 0.046838479 | 0.223513015 | 0           | 0.108341381 |             |             |
|                 | 0.053963043 | 0.036974495 | 0.100129709 | 0           | 0           | 0.057195968 | 0.021779419 |             |
|                 | 0.008472006 | 0.117571887 | 0.134807624 | 0.017977572 | 0.024997999 | 0.039137162 | 0           |             |
|                 | 0           | 0           |             |             |             |             |             |             |
| TCGA-FP-7998-01 | 0.049180822 | 0           | 0.084979025 | 0.213922816 | 0           | 0.093772728 |             |             |
|                 | 0.084798643 | 0.00223639  | 0.083364105 | 0           | 0           | 0.029228865 | 0.013708826 |             |
|                 | 0.057658871 | 0.083493189 | 0.104201566 | 0.027979277 | 0.014751687 | 0.051924829 | 0           |             |
|                 | 0           | 0.004798362 |             |             |             |             |             |             |
| TCGA-D7-8574-01 | 0.046859252 | 0.203879225 | 0.056750712 | 0.107741484 | 0           | 0.202896879 |             |             |
|                 | 0.044503741 | 0           | 0.009792455 | 0.037188547 | 0           | 0.002968599 | 0.027832131 |             |
|                 | 0.039509338 | 0.053458564 | 0.103175505 | 0           | 0           | 0.063443567 | 0           | 0           |
| TCGA-VQ-A8P5-01 | 0.038952126 | 0           | 0.06573364  | 0.150858307 | 0           | 0.159174574 |             |             |
|                 | 0.047454345 | 0.054516073 | 0.009687338 | 0           | 0.046668968 | 0.021114926 | 0.013719115 |             |
|                 | 0.07947232  | 0.08255565  | 0.10124454  | 0.021346892 | 0.030988206 | 0.023700878 | 0           |             |
|                 | 0           | 0.052812101 |             |             |             |             |             |             |
| TCGA-CD-8532-01 | 0.029752879 | 0.012034188 | 0.081051094 | 0.15037045  | 0           | 0.219562936 |             |             |
|                 | 0.030560952 | 0.033901421 | 0.087629638 | 0           | 0           | 0.017496506 | 0.004500226 |             |
|                 | 0.041780576 | 0.064292033 | 0.107443608 | 0.06357664  | 0.035724132 | 0.014304609 |             |             |
|                 | 0.006018113 | 0           | 0           |             |             |             |             |             |

|                 |             |             |             |             |             |             |             |             |
|-----------------|-------------|-------------|-------------|-------------|-------------|-------------|-------------|-------------|
| TCGA-VQ-A91A-01 | 0.02452315  | 0           | 0.047458926 | 0.00061037  | 0           | 0.197396874 | 0           | 0           |
|                 | 0.015783194 | 0           | 0.037976489 | 0           | 0.076410333 | 0.171461268 | 0.010558552 |             |
|                 | 0.12907483  | 0           | 0.073717201 | 0           | 0.166213892 | 0.010590416 | 0.038224506 |             |
| TCGA-CG-4466-01 | 0.114795397 | 0           | 0           | 0.019498606 | 0           | 0.219101615 | 0.16490137  | 0           |
|                 | 0.005664353 | 0.002536722 | 0.05030839  | 0           | 0           | 0.102911482 | 0.085481767 |             |
|                 | 0.105405247 | 0           | 0.013850122 | 0           | 0.010702373 | 0.027743078 | 0.077099479 |             |
| TCGA-BR-8369-01 | 0.160745509 | 0.019843985 | 0.048046509 | 0.060078273 | 0           | 0.205461996 |             |             |
|                 | 0.016491989 | 0           | 0.071475708 | 0           | 0.040161469 | 0           | 0.160600901 | 0.060869005 |
|                 | 0.097070331 | 0.008082022 | 0.000046    | 0.033324876 | 0.017701437 | 0           | 0           |             |
| TCGA-D7-A4Z0-01 | 0.148375388 | 0           | 0.032039268 | 0.039197277 | 0           | 0.282819849 |             |             |
|                 | 0.009293282 | 0.032178679 | 0.051349207 | 0           | 0.000420555 | 0           | 0.037253797 |             |
|                 | 0.017014897 | 0.028989566 | 0.050475276 | 0.096086569 | 0.070639546 | 0.067665247 |             |             |
|                 | 0.003318415 | 0           | 0.032883184 |             |             |             |             |             |
| TCGA-CG-4444-01 | 0.080237286 | 0           | 0.078072271 | 0.089928305 | 0           | 0.200227076 |             |             |
|                 | 0.017987947 | 0.017368063 | 0.023776734 | 0           | 0.013388615 | 0           | 0.01408943  |             |
|                 | 0.111720896 | 0.048033026 | 0.145213559 | 0.010204521 | 0.014681596 | 0.024370522 |             |             |
|                 | 0.019417557 | 0.043063562 | 0.048219034 |             |             |             |             |             |
| TCGA-BR-7715-01 | 0.046554385 | 0           | 0           | 0.080967839 | 0           | 0.238582989 | 0           | 0.058998739 |
|                 | 0.024466407 | 0           | 0           | 0.07091993  | 0.014974707 | 0.130362478 | 0.075550586 |             |
|                 | 0.13502041  | 0.043404517 | 0           | 0.0728816   | 0           | 0.007315413 | 0           |             |
| TCGA-BR-8590-01 | 0.059952524 | 0           | 0.078833348 | 0.11966782  | 0           | 0.196267029 |             |             |
|                 | 0.018822647 | 0.009550858 | 0.065488213 | 0           | 0           | 0.008355561 | 0.005347074 |             |
|                 | 0.085927273 | 0.05669521  | 0.147701858 | 0.053576161 | 0.021435342 | 0.072379084 | 0           |             |
|                 | 0           | 0           |             |             |             |             |             |             |
| TCGA-VQ-A927-01 | 0           | 0           | 0.187218286 | 0.084370504 | 0           | 0.304450236 | 0           | 0           |
|                 | 0.084236402 | 0           | 0.015350564 | 0.019741192 | 0.018914041 | 0.054226097 | 0.047093633 |             |
|                 | 0.104854703 | 0           | 0.012043138 | 0.034773406 | 0           | 0.012613418 | 0.020114379 |             |
| TCGA-D7-A6EV-01 | 0.087342398 | 0           | 0.051057545 | 0.080179056 | 0           | 0.19901423  |             |             |
|                 | 0.012299791 | 0.070091766 | 0.060140791 | 0           | 0           | 0.061555838 | 0.000527124 |             |
|                 | 0.114356481 | 0.031871955 | 0.103897766 | 0.031475802 | 0.037530245 | 0.004998229 |             |             |
|                 | 0.032998499 | 0           | 0.020662484 |             |             |             |             |             |
| TCGA-D7-A748-01 | 0.020603184 | 0           | 0.002669055 | 0.071334557 | 0           | 0.207687156 | 0           |             |
|                 | 0.004638265 | 0.075433657 | 0           | 0           | 0.037218722 | 0.011568646 | 0.100030163 |             |
|                 | 0.052273542 | 0.143676117 | 0.089470285 | 0.023381769 | 0.063289044 | 0           | 0.028286834 |             |
|                 | 0.068439004 |             |             |             |             |             |             |             |
| TCGA-VQ-A91U-01 | 0.034200315 | 0           | 0.128237854 | 0.196439153 | 0           | 0.120395142 |             |             |
|                 | 0.072921696 | 0.051904843 | 0.046409179 | 0           | 0           | 0.028149518 | 0           | 0.075812744 |
|                 | 0.072357481 | 0.096716832 | 0.03940217  | 0           | 0.037053073 | 0           | 0           | 0           |
| TCGA-IN-8663-01 | 0           | 0           | 0.013135091 | 0.162166391 | 0           | 0.160071294 | 0.036353984 |             |
|                 | 0.076090256 | 0.022406807 | 0           | 0           | 0.058680692 | 0.008136195 | 0.075327133 |             |
|                 | 0.078409682 | 0.170520857 | 0.094288895 | 0.015625906 | 0.028786817 | 0           | 0           | 0           |
| TCGA-CG-4477-01 | 0.026892049 | 0           | 0.104787247 | 0.027474422 | 0           | 0.194362322 |             |             |
|                 | 0.102503517 | 0.02542771  | 0           | 0.028226925 | 0           | 0.013179305 | 0           | 0.014180993 |
|                 | 0.059662942 | 0.128594513 | 0.051336063 | 0.07422971  | 0.026036863 | 0           | 0.070788083 |             |

0.052317335

TCGA-CG-4460-01 0.007588127 0 0.040029297 0.080261008 0 0.280946382 0  
0.02409422 0 0 0 0 0 0.01483763 0.069655492 0.246802911  
0.009834848 0.017049056 0 0.130936869 0.056097687 0.021866472

TCGA-RD-A8N5-01 0.021093375 0 0 0.01648777 0 0.251390745 0 0  
0.006199505 0 0.088496158 0 0.025040202 0.155618705 0.004395098  
0.155206574 0 0.028759321 0 0.114996684 0.028752192 0.103563672

TCGA-BR-4363-01 0.030281185 0 0.090909273 0.068700929 0 0.266995042  
0.053062884 0.018182683 0 0.003901763 0.003424841 0.01473657 0.001800183  
0.042096069 0.117748357 0.145152228 0.048727201 0.005094451 0.045019373 0  
0.036705415 0.007461552

TCGA-D7-A6EZ-01 0.004352739 0 0 0.174886225 0 0.14126957 0.0767874  
0.075764149 0.014900795 0 0.02548749 0.010271585 0.002225225 0.045781322  
0.144796559 0.188222388 0.017760108 0.029213153 0 0.027349654 0  
0.020931638

TCGA-IN-A7NT-01 0 0 0.047405299 0.006966869 0 0.230943324 0 0.042663183  
0.024238386 0 0.048996071 0 0 0.125006027 0.026938778 0.143685935 0  
0.165882943 0 0.105154867 0 0.032118319

TCGA-VQ-A8PD-01 0.094069151 0.054556457 0.068322539 0.124211796 0 0.27849955  
0.007458543 0.026377884 0.00418368 0 0.018869724 0.029433728 0.024654386  
0.065259289 0.085407024 0.030076142 0.03410018 0.016418373 0.030669301 0  
0.007432256 0

TCGA-VQ-A924-01 0.013857571 0 0.002100713 0.171245589 0 0.180116539  
0.097430207 0.058694235 0.033726132 0 0.001816744 0.022804012 0  
0.108090645 0.068113576 0.153783354 0.003135303 0.053136534 0.024869453 0  
0.003063214 0.004016181

TCGA-HU-A4GH-01 0.101484467 0 0.132456193 0 0 0.286709353 0 0  
0.005275025 0 0.049870397 0 0 0.128805747 0.033415777 0 0.017403851  
0.035149184 0 0.120408046 0 0.08902196

TCGA-HU-A4H8-01 0 0 0.028027429 0.158703724 0 0.212349635 0.046137489  
0.06423907 0.045710663 0 0 0.045574551 0.005416233 0.086706701  
0.069540017 0.147659916 0.000601206 0.040424841 0.048449442 0 0  
0.000459084

TCGA-BR-4370-01 0.057976421 0 0.05715506 0.032581771 0 0.250694057  
0.056992887 0.022031442 0.01301004 0 0.00760033 0 0 0.064325447  
0.068735868 0.147305947 0 0.007194383 0 0.09862642 0.047343048  
0.06842688

TCGA-FP-A9TM-01 0.207631845 0.110973983 0.091069013 0.078238212 0 0.22655864  
0.017967115 0.057887549 0.034340613 0 0.000442646 0 0 0.039294368  
0.045313129 0.055472918 0 0.022124734 0.012685237 0 0 0

TCGA-BR-6852-01 0.029425352 0 0.077811924 0.164148342 0 0.103374664  
0.042240828 0.057683856 0.061446887 0 0.016659681 0.07574525 0.001405772  
0.063428072 0.069457336 0.13131054 0.009233855 0.037262714 0.052507061 0  
0 0.006857864

|                 |             |             |             |             |             |                           |
|-----------------|-------------|-------------|-------------|-------------|-------------|---------------------------|
| TCGA-CG-4476-01 | 0.008763858 | 0.026088749 | 0.009199979 | 0.07407439  | 0           | 0.266877891               |
|                 | 0.014751722 | 0           | 0.017230635 | 0.038210194 | 0.000989802 | 0 0.001711732             |
|                 | 0.035335649 | 0.043552735 | 0.176889766 | 0.075920689 | 0.000143563 | 0.103017182 0             |
|                 | 0.086687125 | 0.020554341 |             |             |             |                           |
| TCGA-VQ-A8DU-01 | 0.090412048 | 0           | 0.066354846 | 0.123742507 | 0           | 0.186722625 0             |
|                 | 0.006612699 | 0.083081566 | 0           | 0           | 0.059723437 | 0 0.132032655 0.06903538  |
|                 | 0.082357729 | 0.002358966 | 0.003710021 | 0.082581164 | 0           | 0 0.011274357             |
| TCGA-CG-4443-01 | 0           | 0           | 0           | 0.010819499 | 0           | 0.211946272 0 0.007860737 |
|                 | 0.066050307 | 0           | 0.029080834 | 0           | 0.061919315 | 0.059525555 0.05534661    |
|                 | 0.476948909 | 0           | 0           | 0           | 0.004432015 | 0 0.016069946             |
| TCGA-BR-4257-01 | 0.041065115 | 0           | 0           | 0.130836751 | 0           | 0.180587097 0.07686753    |
|                 | 0.030289668 | 0.00461426  | 0           | 0.002646919 | 0.022067796 | 0.005459157 0.120909657   |
|                 | 0.069158444 | 0.161631221 | 0.03910319  | 0           | 0.025773058 | 0 0.035412805             |
|                 | 0.053577333 |             |             |             |             |                           |
| TCGA-D7-6815-01 | 0.070705419 | 0           | 0.067463481 | 0.071698712 | 0           | 0.263919517               |
|                 | 0.049675882 | 0           | 0.080731604 | 0           | 0.008814315 | 0 0.011066803 0.134313608 |
|                 | 0.058949615 | 0.115804362 | 0.043636847 | 0.002415222 | 0.013430883 | 0 0                       |
|                 | 0.007373731 |             |             |             |             |                           |
| TCGA-BR-A4J9-01 | 0.065388963 | 0.071110825 | 0.152788429 | 0.088231831 | 0           | 0.257008671               |
|                 | 0.014639555 | 0.005059626 | 0.04524736  | 0.016985691 | 0           | 0.013276045 0.0000557     |
|                 | 0.012995535 | 0.072583124 | 0.112123797 | 0.008881692 | 0.020221795 | 0.043401322 0             |
|                 | 0           | 0           |             |             |             |                           |
| TCGA-BR-7723-01 | 0.03721509  | 0           | 0.118913438 | 0.162774975 | 0           | 0.14273381                |
|                 | 0.05354572  | 0.044110985 | 0.044041554 | 0           | 0           | 0.01243014 0.03347764     |
|                 | 0.075946989 | 0.078631171 | 0.127718933 | 0.042659767 | 0           | 0.021472672 0             |
|                 | 0.004327117 | 0           |             |             |             |                           |
| TCGA-RD-A8NB-01 | 0.101340988 | 0           | 0           | 0.05727855  | 0           | 0.270101749 0 0.061442811 |
|                 | 0.006254435 | 0           | 0           | 0.084375411 | 0.028458877 | 0.0219359 0.090870885     |
|                 | 0.138169234 | 0           | 0.054534647 | 0.06290166  | 0           | 0 0.022334854             |
| TCGA-D7-6520-01 | 0.031543871 | 0           | 0.051677938 | 0.064170636 | 0           | 0.201719838               |
|                 | 0.031121785 | 0.040955282 | 0.09824212  | 0           | 0           | 0.026974376 0.039969459   |
|                 | 0.108501262 | 0.070992782 | 0.134304642 | 0.002561901 | 0.044872866 | 0.051188859 0             |
|                 | 0           | 0.001202383 |             |             |             |                           |
| TCGA-BR-6452-01 | 0.034833005 | 0           | 0.054557708 | 0.144954437 | 0           | 0.178703274               |
|                 | 0.079264083 | 0.024970568 | 0.061601607 | 0           | 0.022177289 | 0.013737688 0.00751108    |
|                 | 0.102039627 | 0.062022318 | 0.145453803 | 0.014582074 | 0.013107017 | 0.024660574 0             |
|                 | 0           | 0.015823851 |             |             |             |                           |
| TCGA-IN-A6RR-01 | 0.087055308 | 0           | 0.134425068 | 0.19064931  | 0           | 0.204257756 0             |
|                 | 0.029115493 | 0.058064911 | 0.014425804 | 0           | 0.030363663 | 0 0.016369053             |
|                 | 0.054113259 | 0.095850641 | 0.020423967 | 0.007342478 | 0.054690436 | 0 0                       |
|                 | 0.002852853 |             |             |             |             |                           |
| TCGA-VQ-A928-01 | 0.076601266 | 0           | 0.050140773 | 0.039276323 | 0           | 0.249056564 0             |
|                 | 0.037874356 | 0.045767747 | 0           | 0.038466835 | 0           | 0.012908257 0.100831005   |
|                 | 0.030769603 | 0.045370377 | 0.026859826 | 0.03543775  | 0           | 0.187991446 0             |

0.022647873

TCGA-BR-A4J7-01 0.018533947 0 0.06247613 0.298724426 0 0.106634742  
0.046344361 0.016729813 0.061951763 0 0 0.049630387 0.037140926  
0.015189873 0.090677367 0.124421844 0.029819243 0 0.041725178 0 0 0

TCGA-BR-8059-01 0.019567175 0 0.121330407 0.118995799 0 0.202824474  
0.048800083 0.028500869 0.033536765 0 0.031798865 0 0.018395204  
0.12646613 0.077133011 0.112005305 0.020180227 0 0 0.034927707  
0.005537979 0

TCGA-VQ-A8DT-01 0 0.010284651 0.075279907 0.121601739 0 0.252063763  
0.069855352 0.013166413 0.04503792 0.010650865 0 0.050384849 0  
0.11223589 0.032175003 0.061962131 0.009354732 0.024260821 0.065874086 0  
0.015739266 0.030072611

TCGA-VQ-A8P8-01 0.091077999 0.073627378 0.156250396 0.067184357 0 0.187855598  
0.026572275 0.021711232 0.080549157 0 0 0.010366529 0 0.037963991  
0.014538757 0.0212679 0.041295578 0.053296631 0.116442222 0 0 0

TCGA-VQ-A91D-01 0 0.005974268 0.011133776 0.100333534 0 0.211080829  
0.021643817 0.091076455 0.0000916 0 0.027022514 0.031041483 0.031389369  
0.088186503 0.130409833 0.129888973 0 0 0 0.094483587 0 0.026243436

TCGA-BR-7901-01 0.045579744 0 0.0228123 0.119971809 0 0.173353261  
0.018139549 0 0.095515838 0 0 0.073388196 0.01920922 0.126538518  
0.071626339 0.125863924 0.040469902 0.036436992 0.01291288 0 0  
0.018181526

TCGA-CG-4306-01 0 0.011752686 0.054953735 0.011099331 0 0.323073434  
0.047260654 0.015934539 0 0 0.026155292 0 0.025267438 0.034074982  
0.037755129 0.134034194 0.043700242 0.049033015 0 0.077395997 0.016358279  
0.092151053

TCGA-BR-6565-01 0.011768686 0.015459519 0.071366261 0.190731008 0 0.129345057  
0.073437316 0.050630771 0.025627732 0 0 0.022911227 0.011511904  
0.125158341 0.079835696 0.143039879 0.002999605 0.012585925 0.033591072 0  
0 0

TCGA-BR-7704-01 0.007301859 0.040586634 0.074899789 0.20034778 0 0.104457679  
0.041713184 0.039563326 0.079934696 0 0.009068547 0.050485938 0.032396091  
0.029792255 0.085959988 0.103809109 0.087450767 0.012232359 0 0 0 0

TCGA-CG-4436-01 0.041714303 0 0.007944369 0 0 0.311476735 0.095998963 0  
0 0 0 0 0.010092946 0.077411255 0.053265369 0.114663964 0.046337916  
0 0 0.065425328 0.059075103 0.11659375

TCGA-HU-A4G2-01 0.040522422 0 0.027611221 0.199745935 0 0.155470809  
0.107372558 0 0.029254739 0.025949451 0 0.019736619 0 0.05424474  
0.074365401 0.15677029 0.05876015 0.013191593 0.036340731 0 0  
0.000663341

TCGA-VQ-A94T-01 0.073334895 0 0.046752872 0.04021321 0 0.256486969 0 0  
0.065097351 0 0.070760309 0.069161947 0 0.184471771 0.003117381  
0.139594901 0 0.013173743 0 0.006769596 0 0.031065056

TCGA-IN-A6RI-01 0.071380798 0 0.05376437 0.001221477 0 0.25783407 0

|                 |             |             |             |             |             |             |             |             |             |
|-----------------|-------------|-------------|-------------|-------------|-------------|-------------|-------------|-------------|-------------|
|                 | 0.05857162  | 0.102717208 | 0           | 0           | 0.067847463 | 0           | 0.109473845 | 0.01316203  |             |
|                 | 0.13727109  | 0           | 0.09079644  | 0.015603388 | 0           | 0           | 0.0203562   |             |             |
| TCGA-IN-A7NU-01 | 0           | 0.025279474 | 0.063813436 | 0.137609609 | 0           |             | 0.149223334 |             |             |
|                 | 0.03034119  | 0.003887205 | 0.113516079 | 0           | 0.007071713 | 0           | 0.004692398 |             |             |
|                 | 0.051170246 | 0.072947907 | 0.183704138 | 0.051552102 | 0.023575602 | 0.015427665 |             |             |             |
|                 | 0.03660308  | 0           | 0.029584823 |             |             |             |             |             |             |
| TCGA-CD-8534-01 | 0.125722995 | 0           | 0.071977392 | 0.107125072 | 0           | 0.147724713 |             |             |             |
|                 | 0.014972574 | 0           | 0.075472892 | 0.005652151 | 0           | 0.009416684 | 0.002028662 |             |             |
|                 | 0.021493513 | 0.080690559 | 0.157181357 | 0.087113399 | 0.003913873 | 0.089514164 | 0           |             |             |
|                 | 0           | 0           |             |             |             |             |             |             |             |
| TCGA-VQ-AA68-01 | 0.123294656 | 0           | 0.03512016  | 0.129035151 | 0           | 0.185473489 |             |             |             |
|                 | 0.033678195 | 0.043571397 | 0.075271352 | 0           | 0           | 0.036966921 | 0.000901376 |             |             |
|                 | 0.041355517 | 0.056962142 | 0.069909615 | 0.046909832 | 0.018192453 | 0.103357742 | 0           |             |             |
|                 | 0           | 0           |             |             |             |             |             |             |             |
| TCGA-FP-8631-01 | 0.13030691  | 0           | 0.126249198 | 0.007210096 | 0           | 0.172092692 |             |             |             |
|                 | 0.003657592 | 0.020826364 | 0.051640313 | 0           | 0           | 0.045278219 | 0.017088589 |             |             |
|                 | 0.103571652 | 0.021724172 | 0.078013018 | 0           | 0.144644906 | 0.06975708  | 0           | 0           |             |
|                 | 0.007939199 |             |             |             |             |             |             |             |             |
| TCGA-D7-A6EY-01 | 0.107415748 | 0           | 0.078488732 | 0.14886097  | 0           | 0.106276861 |             |             |             |
|                 | 0.070816297 | 0.040642528 | 0.072546028 | 0           | 0           | 0.010752755 | 0           | 0.025319968 |             |
|                 | 0.089200962 | 0.112322206 | 0.059118455 | 0.014976073 | 0.029314543 | 0           | 0           |             |             |
|                 | 0.033947874 |             |             |             |             |             |             |             |             |
| TCGA-D7-6526-01 | 0.078824912 | 0           | 0           | 0.008126635 | 0           | 0.266652296 | 0           | 0           |             |
|                 | 0.168274431 | 0           | 0.021492017 | 0           | 0.0131238   | 0.152240275 | 0.023158986 |             |             |
|                 | 0.088904188 | 0.020392375 | 0.038668152 | 0           | 0.073401666 | 0           | 0.046740266 |             |             |
| TCGA-BR-8364-01 | 0.074944868 | 0           | 0.025557309 | 0.141717958 | 0           | 0.230463197 |             |             |             |
|                 | 0.008155737 | 0           | 0.04086042  | 0           | 0           | 0.01725782  | 0.011825598 | 0.023854322 |             |
|                 | 0.04694596  | 0.167799755 | 0.071641961 | 0.017727683 | 0.121247413 | 0           | 0           | 0           |             |
| TCGA-BR-6563-01 | 0.145308366 | 0           | 0.070209291 | 0.116993889 | 0           | 0.209811852 | 0           | 0           |             |
|                 | 0.055097166 | 0           | 0           | 0.050713145 | 0.028090317 | 0.034869165 | 0.061026501 |             |             |
|                 | 0.118225973 | 0.019785502 | 0           | 0.089868832 | 0           | 0           | 0           |             |             |
| TCGA-BR-8676-01 | 0.017638279 | 0           | 0.01085895  | 0.262894029 | 0           | 0.062737135 |             |             |             |
|                 | 0.119041418 | 0           | 0.111274636 | 0.03484113  | 0           | 0           | 0.007927879 | 0           | 0.077627473 |
|                 | 0.193993224 | 0.063536146 | 0           | 0           | 0           | 0.037629701 |             |             |             |
| TCGA-CG-5721-01 | 0.039038683 | 0.004908863 | 0.026459817 | 0.266395825 | 0           | 0.009889364 |             |             |             |
|                 | 0.060923852 | 0.058500431 | 0.056685279 | 0           | 0           | 0.058246229 | 0.030900595 |             |             |
|                 | 0.040675767 | 0.07667865  | 0.112143825 | 0.044038426 | 0.040338539 | 0.037631391 | 0           |             |             |
|                 | 0.027842117 | 0.008702349 |             |             |             |             |             |             |             |
| TCGA-HF-7133-01 | 0.026470621 | 0           | 0.078144557 | 0.063944653 | 0           | 0.250057627 |             |             |             |
|                 | 0.031941857 | 0.017612995 | 0.056237189 | 0           | 0           | 0.028847122 | 0.005232699 |             |             |
|                 | 0.065107223 | 0.062217064 | 0.155404442 | 0.027449641 | 0.022069177 | 0.068139447 | 0           |             |             |
|                 | 0           | 0.041123686 |             |             |             |             |             |             |             |
| TCGA-CD-8528-01 | 0.017920976 | 0           | 0           | 0.051111778 | 0           | 0.240153845 | 0.009400905 |             |             |
|                 | 0.021505011 | 0.057376372 | 0           | 0.04489554  | 0.001849564 | 0           | 0.212415023 |             |             |

|                 |             |             |             |             |             |             |             |             |
|-----------------|-------------|-------------|-------------|-------------|-------------|-------------|-------------|-------------|
|                 | 0.061868064 | 0.188383364 | 0.018623771 | 0           | 0.004360556 | 0           | 0           | 0.07013523  |
| TCGA-CD-5813-01 | 0.096546496 | 0           | 0.094099421 | 0.169300961 | 0           | 0.106749495 |             |             |
|                 | 0.02456153  | 0.041005674 | 0.062855001 | 0           | 0           | 0.011795981 | 0.048808439 |             |
|                 | 0.058503735 | 0.054747027 | 0.126271984 | 0.08473977  | 0           | 0.013843146 | 0           |             |
|                 | 0.006171339 | 0           |             |             |             |             |             |             |
| TCGA-BR-8484-01 | 0.048987341 | 0           | 0.084379875 | 0.122961268 | 0           | 0.188909474 |             |             |
|                 | 0.040439648 | 0.033729852 | 0.056810964 | 0           | 0           | 0.012718212 | 0           | 0.088406014 |
|                 | 0.071632958 | 0.132948337 | 0.048570183 | 0.006879199 | 0.03342379  | 0           | 0.023575247 |             |
|                 | 0.005627637 |             |             |             |             |             |             |             |
| TCGA-BR-6457-01 | 0.062792657 | 0.011852513 | 0.132243022 | 0.171552102 | 0           | 0.161181448 |             |             |
|                 | 0.044561673 | 0.003334013 | 0.047498828 | 0           | 0           | 0.021387482 | 0.020158346 |             |
|                 | 0.003363191 | 0.064613669 | 0.098424473 | 0.073047074 | 0.00156362  | 0.082425887 | 0           |             |
|                 | 0           | 0           |             |             |             |             |             |             |
| TCGA-FP-7916-01 | 0.037176045 | 0.035934578 | 0.100590834 | 0.083712345 | 0           | 0.155070843 |             |             |
|                 | 0.064473907 | 0           | 0.003096855 | 0           | 0           | 0.075773428 | 0.016313159 | 0.052179872 |
|                 | 0.091241495 | 0.125416353 | 0.000611381 | 0.048635422 | 0.109773483 | 0           | 0           | 0           |
| TCGA-BR-4187-01 | 0.079733188 | 0           | 0           | 0.065733644 | 0           | 0.226652512 | 0.045162943 | 0           |
|                 | 0.011169483 | 0.01244479  | 0.003295931 | 0           | 0.032271026 | 0.005128611 | 0.03706714  |             |
|                 | 0.208960465 | 0.012126526 | 0.00967248  | 0.143431012 | 0           | 0.062620208 | 0.044530043 |             |
| TCGA-KB-A93H-01 | 0.070715283 | 0           | 0           | 0.080488403 | 0           | 0.408157973 | 0.059039348 |             |
|                 | 0.02926037  | 0           | 0           | 0           | 0.005600252 | 0           | 0.153911612 | 0.073596478 |
|                 | 0.012942467 | 0.014764005 | 0           | 0           | 0           | 0.001349255 |             | 0.090174554 |
| TCGA-BR-8592-01 | 0.096657531 | 0.019989077 | 0.121114669 | 0.116787495 | 0           | 0.215566165 |             |             |
|                 | 0.044189534 | 0           | 0.040950436 | 0           | 0           | 0.007895226 | 0.031207254 | 0           |
|                 | 0.151179201 | 0.016189679 | 0.008617645 | 0.08544244  | 0           | 0.008930463 | 0           |             |
| TCGA-BR-4366-01 | 0.022283704 | 0           | 0.029622533 | 0           | 0           | 0.251944918 | 0.01288843  |             |
|                 | 0.025550582 | 0.02683396  | 0.023605461 | 0           | 0.002049402 | 0.092137564 | 0.167316859 |             |
|                 | 0.079771432 | 0.191285404 | 0.003302928 | 0.029804256 | 0.026103091 | 0           | 0           |             |
|                 | 0.015499476 |             |             |             |             |             |             |             |
| TCGA-BR-7851-01 | 0.066689587 | 0           | 0.121610636 | 0.13684184  | 0           | 0.155855819 |             |             |
|                 | 0.058614016 | 0.016052758 | 0.056666639 | 0           | 0.012661437 | 0.008506572 | 0.012511183 |             |
|                 | 0.102178013 | 0.08150536  | 0.117346882 | 0.034735444 | 0           | 0.018223816 | 0           | 0           |
| TCGA-SW-A7EA-01 | 0           | 0.017630715 | 0.033041216 | 0.225753206 | 0           | 0.066532784 |             |             |
|                 | 0.09999282  | 0.054124383 | 0.048081765 | 0           | 0           | 0.069951598 | 0           | 0.066614582 |
|                 | 0.073753512 | 0.079300012 | 0.039218892 | 0.057932901 | 0.053791459 | 0           | 0           |             |
|                 | 0.014280157 |             |             |             |             |             |             |             |
| TCGA-CD-5803-01 | 0.052158395 | 0           | 0.01974089  | 0.150578057 | 0           | 0.168412246 |             |             |
|                 | 0.038478604 | 0.012994816 | 0.077740818 | 0           | 0           | 0.051479058 | 0.048490289 |             |
|                 | 0.033620101 | 0.094529099 | 0.145721441 | 0.022043641 | 0.044613189 | 0.039399355 | 0           |             |
|                 | 0           | 0           |             |             |             |             |             |             |
| TCGA-D7-6525-01 | 0.040691422 | 0           | 0.008951295 | 0.144147008 | 0           | 0.105204568 |             |             |
|                 | 0.024954202 | 0           | 0.093403684 | 0           | 0.027862459 | 0.034357022 | 0.013125087 |             |
|                 | 0.114317859 | 0.041252204 | 0.200614265 | 0.004439386 | 0.045971842 | 0.066218138 | 0           |             |
|                 | 0           | 0.034489557 |             |             |             |             |             |             |

|                 |             |             |             |             |             |             |             |
|-----------------|-------------|-------------|-------------|-------------|-------------|-------------|-------------|
| TCGA-RD-A8N9-01 | 0.068170054 | 0           | 0.112051884 | 0.147898264 | 0           | 0.144840581 |             |
|                 | 0.04271991  | 0.02247716  | 0.094433286 | 0           | 0.002111301 | 0           | 0.083210344 |
|                 | 0.056482597 | 0.129358119 | 0.030904982 | 0.004420463 | 0.060921056 | 0           | 0           |
| TCGA-BR-4279-01 | 0.049306298 | 0           | 0.082926706 | 0.086656644 | 0           | 0.149941495 |             |
|                 | 0.043064096 | 0.012893639 | 0           | 0.015524955 | 0.01226944  | 0           | 0.037218995 |
|                 | 0.074561213 | 0.038811031 | 0.133460807 | 0.024141448 | 0.021268541 | 0           | 0.132428861 |
|                 | 0.029158063 | 0.056367769 |             |             |             |             |             |
| TCGA-BR-8080-01 | 0.107619153 | 0           | 0.088052336 | 0.124314228 | 0           | 0.172168833 |             |
|                 | 0.038621441 | 0.020474706 | 0.070285656 | 0           | 0           | 0.009952627 | 0.100561521 |
|                 | 0.049636312 | 0.112666425 | 0.034173277 | 0           | 0.031992169 | 0.02624995  | 0.013231365 |
|                 | 0           |             |             |             |             |             |             |
| TCGA-BR-A4PF-01 | 0.010344842 | 0           | 0.055602783 | 0           | 0           | 0.299262476 | 0.058501854 |
|                 | 0.010368987 | 0.007643056 | 0.027937474 | 0           | 0.064117313 | 0           | 0.136348175 |
|                 | 0.08236531  | 0.126784889 | 0.0015908   | 0.009189379 | 0.022189514 | 0           | 0           |
|                 | 0.087753148 |             |             |             |             |             |             |
| TCGA-HU-A4G3-01 | 0.019639024 | 0           | 0.038860338 | 0.064307992 | 0           | 0.233503529 | 0           |
|                 | 0.008886513 | 0.067455598 | 0           | 0           | 0.062760303 | 0           | 0.13220387  |
|                 | 0.101192611 | 0.031312585 | 0.002539474 | 0.183013176 | 0           | 0           | 0.026622789 |
| TCGA-CD-8531-01 | 0           | 0.223401906 | 0.187517446 | 0.10935313  | 0           | 0           | 0.038989244 |
|                 | 0.069489575 | 0.033123215 | 0.011767052 | 0           | 0           | 0           | 0.007228028 |
|                 | 0.017767635 | 0.087490765 | 0.000379419 | 0           | 0           | 0.000178838 | 0.213313747 |
| TCGA-R5-A7ZF-01 | 0           | 0           | 0.07376902  | 0.033687954 | 0           | 0.297917581 | 0.151697128 |
|                 | 0.012707477 | 0           | 0           | 0.032300876 | 0.056237844 | 0.014560844 | 0.164037667 |
|                 | 0.089748333 | 0           | 0           | 0.055229209 | 0           | 0.014896528 | 0.003209539 |
| TCGA-BR-8384-01 | 0.072028898 | 0           | 0.017799078 | 0.176057368 | 0           | 0.208537291 |             |
|                 | 0.020604989 | 0.000366675 | 0.056463906 | 0           | 0           | 0.030296099 | 0.021418399 |
|                 | 0.054228378 | 0.136031725 | 0.063986686 | 0.01762473  | 0.124555778 | 0           | 0           |
| TCGA-VQ-A922-01 | 0.128534072 | 0           | 0.03602177  | 0.01447711  | 0           | 0.310996277 | 0           |
|                 | 0.077841447 | 0.041500888 | 0           | 0.022187113 | 0           | 0           | 0.126776019 |
|                 | 0.108873237 | 0.007556529 | 0.018613685 | 0           | 0.009958524 | 0           | 0.096663329 |
| TCGA-B7-A5TI-01 | 0.101876017 | 0           | 0.103021013 | 0.113127176 | 0           | 0.144226282 |             |
|                 | 0.062879779 | 0.010647087 | 0.060073153 | 0           | 0           | 0.011234184 | 0.002320901 |
|                 | 0.093009252 | 0.074303568 | 0.12498386  | 0.032414379 | 0.007775198 | 0.058108151 | 0           |
|                 | 0           | 0           |             |             |             |             |             |
| TCGA-BR-8368-01 | 0.033056252 | 0           | 0.103858951 | 0.173729821 | 0           | 0.241286327 |             |
|                 | 0.065374672 | 0.045152662 | 0.085635863 | 0           | 0           | 0.00022807  | 0.064664125 |
|                 | 0.058443034 | 0.093803113 | 0.022756168 | 0.005626361 | 0.006384581 | 0           | 0           |
| TCGA-BR-4357-01 | 0.015985709 | 0           | 0.102253495 | 0.028849579 | 0           | 0.232924956 |             |
|                 | 0.062118444 | 0.027590669 | 0           | 0           | 0.023942744 | 0.00926439  | 0.005198878 |
|                 | 0.079833048 | 0.094256123 | 0.200033921 | 0.051506348 | 0.028770954 | 0           | 0.000201553 |
|                 | 0           | 0.037269192 |             |             |             |             |             |
| TCGA-BR-4371-01 | 0           | 0           | 0.008653267 | 0.029224979 | 0           | 0.381302369 | 0.051512739 |
|                 | 0.014186522 | 0.073797677 | 0.020902634 | 0.012512276 | 0           | 0           | 0.040468835 |
|                 | 0.0882705   | 0.13470578  | 0.065660295 | 0.020566509 | 0.018053764 | 0           | 0.022009397 |

0.018172457

TCGA-VQ-A91N-01 0.106796323 0 0.11995828 0.127622852 0 0.230010075  
0.040731018 0.011710541 0.069126538 0 0.037444439 0 0.037130388  
0.048323437 0.047706195 0.085282615 0.024144591 0.001887021 0 0.012125685  
0

TCGA-VQ-AA6J-01 0.103036813 0 0.028115488 0.089237397 0 0.158785863  
0.074630403 0.065487262 0.048330904 0 0 0.012330019 0.001895501  
0.117896242 0.079284972 0.114057051 0.057375004 0.016612839 0.03292424 0  
0 0

TCGA-CG-5724-01 0 0.005501941 0.025345011 0.129864118 0 0.106862103  
0.030503938 0.028107117 0.068870118 0 0.001039039 0.018356827 0.033551905  
0.099197378 0.063179117 0.16481763 0 0.057371369 0 0.128605621 0  
0.038826768

TCGA-VQ-A94O-01 0.003582206 0 0.020861015 0.114206214 0 0.396674371  
0.006679191 0.000901606 0.077642618 0 0.025937152 0.016060499 0.011716447  
0.166824367 0.041827617 0.016536526 0.01701918 0.019599871 0 0.063931119  
0 0

TCGA-BR-8591-01 0.037051521 0.027387702 0.079822562 0.023293651 0 0.24974533  
0.037694919 0.046240989 0.019827221 0 0 0.058681123 0 0.055726415  
0.080661021 0.176038714 0.020195185 0.022700749 0.0369342 0 0  
0.027998699

TCGA-VQ-AA64-01 0.115592638 0 0.058550001 0.111928933 0 0.222009723 0  
0.049205727 0.063555571 0 0 0.055561109 0 0.103672066 0.078700397  
0.097992632 0 0.014201284 0.02800086 0 0 0.001029059

TCGA-FP-8099-01 0.050142114 0 0.08267239 0.037874062 0 0.194942347 0  
0.035651008 0.073437382 0 0 0.061341757 0 0.196635385 0.069021787  
0.127860114 0 0.009617809 0.052440644 0 0 0.008363202

TCGA-F1-A448-01 0.073369746 0 0.069167842 0.087933507 0 0.192160153  
0.018846012 0.008114267 0.036159398 0 0.036747593 0 0.005057151  
0.15733005 0.018395022 0.104937679 0.008460213 0.02153023 0 0.088378345  
0.012937339 0.060475455

TCGA-RD-A8N0-01 0.067375635 0.085181184 0.128404721 0.163291573 0 0.159725741  
0.017056317 0.048405593 0.046225359 0 0 0.010709198 0.000660964  
0.009983005 0.047689418 0.068762251 0.044267228 0.017550927 0.081938102 0  
0.002772785 0

TCGA-CD-8525-01 0 0.099666632 0.090129597 0.186240326 0 0.032921789  
0.080465082 0.060476973 0.068714145 0 0.00204411 0.005858014 0.021819018  
0.07749235 0.104298413 0.098970706 0 0.035024829 0.002604309 0 0  
0.033273706

TCGA-FP-A4BF-01 0.005558387 0 0.080753608 0.170355607 0 0.115259121  
0.043211253 0.0250993 0.058139306 0 0 0.100097227 0.019943202  
0.045286141 0.059778683 0.133883193 0.025418384 0.035411417 0.071470623 0  
0.004494574 0.005839971

TCGA-FP-A8CX-01 0.027579539 0 0.148570233 0.116443598 0 0.189236255

|                 |             |             |             |             |             |             |             |             |
|-----------------|-------------|-------------|-------------|-------------|-------------|-------------|-------------|-------------|
|                 | 0.030096504 | 0.009630529 | 0.076492189 | 0           | 0           | 0.01600466  | 0           | 0.133803809 |
|                 | 0.050310514 | 0.11164112  | 0.014751498 | 0.006503361 | 0.058940473 | 0           | 0           |             |
|                 | 0.009995718 |             |             |             |             |             |             |             |
| TCGA-RD-A7BS-01 | 0.070163697 | 0.044837569 | 0.060538223 | 0.08685759  | 0           | 0.209806937 |             |             |
|                 | 0.017984142 | 0.04006127  | 0.059636755 | 0           | 0           | 0.018018627 | 0           | 0.075350151 |
|                 | 0.087841738 | 0.056109726 | 0.055340136 | 0.030004845 | 0.06981486  | 0           | 0.009860278 |             |
|                 | 0.007773458 |             |             |             |             |             |             |             |
| TCGA-BR-7716-01 | 0.022919217 | 0           | 0.058959456 | 0.150813204 | 0           | 0.151049862 |             |             |
|                 | 0.084729518 | 0.042299235 | 0.082042961 | 0           | 0.003141286 | 0.011007439 | 0.015913369 |             |
|                 | 0.079861016 | 0.094652185 | 0.124932063 | 0.030510695 | 0.005767923 | 0.041400573 | 0           |             |
|                 | 0           | 0           |             |             |             |             |             |             |
| TCGA-BR-8366-01 | 0.061546605 | 0.017954637 | 0.084754462 | 0.145932957 | 0           | 0.112952349 |             |             |
|                 | 0.041737689 | 0.010751377 | 0.016029272 | 0           | 0           | 0.087587444 | 0.02189616  |             |
|                 | 0.052620836 | 0.102805738 | 0.122406196 | 0.058351964 | 0.014130065 | 0.048542252 | 0           |             |
|                 | 0           | 0           |             |             |             |             |             |             |
| TCGA-VQ-AA6G-01 | 0.059771326 | 0           | 0.096486022 | 0.048364528 | 0           | 0.204067257 | 0           | 0           |
|                 | 0.086302167 | 0           | 0.010123523 | 0.007013376 | 0           | 0.196519631 | 0.021801774 |             |
|                 | 0.06462096  | 0           | 0.059696064 | 0           | 0.130169059 | 0           | 0.015064313 |             |
| TCGA-CG-4465-01 | 0.039623997 | 0           | 0.014722528 | 0.050651284 | 0           | 0.215567039 |             |             |
|                 | 0.05387622  | 0.022414405 | 0.051704913 | 0           | 0.031358295 | 0           | 0           | 0.089273001 |
|                 | 0.078505787 | 0.236476736 | 0.020616591 | 0.005898649 | 0.000631098 | 0.012391758 |             |             |
|                 | 0.008756094 | 0.067531604 |             |             |             |             |             |             |
| TCGA-HU-A4H5-01 | 0.020568704 | 0           | 0.194862297 | 0.148487672 | 0           | 0.146072007 |             |             |
|                 | 0.047765842 | 0           | 0.058062061 | 0           | 0.005291783 | 0           | 0           | 0.147948263 |
|                 | 0.119894377 | 0           | 0.014023749 | 0           | 0.001420177 | 0           | 0.052899701 |             |
| TCGA-CG-4437-01 | 0.044709914 | 0           | 0.059997223 | 0.189877771 | 0           | 0.083632104 |             |             |
|                 | 0.002632985 | 0.074537561 | 0.027399749 | 0           | 0           | 0.088419345 | 0.039803165 |             |
|                 | 0.002123866 | 0.053894294 | 0.142205123 | 0.065255943 | 0.03077477  | 0.056176707 | 0           |             |
|                 | 0           | 0.038559481 |             |             |             |             |             |             |
| TCGA-CD-5804-01 | 0.033140733 | 0           | 0           | 0.011101694 | 0           | 0.281851841 | 0           | 0           |
|                 | 0.086523593 | 0           | 0.003719074 | 0.039556936 | 0.060398824 | 0.099409852 | 0.055538413 |             |
|                 | 0.165659291 | 0           | 0.052140803 | 0.020862643 | 0           | 0           | 0.090096304 |             |
| TCGA-HF-A5NB-01 | 0.021622515 | 0           | 0           | 0.169013236 | 0           | 0.269132037 | 0.059516217 |             |
|                 | 0.058044416 | 0.059531224 | 0           | 0           | 0.022988118 | 0           | 0.073238999 | 0.081068241 |
|                 | 0.121387431 | 0.060366731 | 0           | 0           | 0.004090834 | 0           | 0           |             |
| TCGA-BR-8365-01 | 0.068552012 | 0           | 0.114137928 | 0.137660136 | 0           | 0.249413661 |             |             |
|                 | 0.004404036 | 0.015559225 | 0.043457917 | 0.007092367 | 0           | 0.013996412 | 0.020505482 |             |
|                 | 0           | 0.068174042 | 0.11870409  | 0.035460783 | 0.011563376 | 0.091318532 | 0           | 0           |
| TCGA-CD-8527-01 | 0.071107053 | 0           | 0.054561653 | 0.21258825  | 0           | 0.051019148 |             |             |
|                 | 0.051572544 | 0.049129178 | 0.088774188 | 0           | 0           | 0.054640214 | 0           | 0.093973232 |
|                 | 0.048569678 | 0.128086928 | 0           | 0.038412711 | 0.045626932 | 0           | 0           | 0.01193829  |
| TCGA-D7-A6F0-01 | 0.057346037 | 0           | 0.049014626 | 0.038162962 | 0           | 0.241204163 |             |             |
|                 | 0.07551774  | 0.024022736 | 0           | 0           | 0           | 0.108187049 | 0           | 0.069358159 |
|                 | 0.078075843 |             |             |             |             |             |             |             |
|                 | 0.208052111 | 0.005488798 | 0.020148103 | 0.025421674 | 0           | 0           | 0           | 0           |

|                 |             |             |             |             |             |             |             |
|-----------------|-------------|-------------|-------------|-------------|-------------|-------------|-------------|
| TCGA-BR-7957-01 | 0.085325362 | 0           | 0.010213917 | 0.101223882 | 0           | 0.197939686 |             |
|                 | 0.013462214 | 0.055795003 | 0.034782747 | 0           | 0           | 0.022365544 | 0.00033125  |
|                 | 0.107176289 | 0.043025034 | 0.142374341 | 0           | 0.0118775   | 0.150429864 | 0 0         |
|                 | 0.023677367 |             |             |             |             |             |             |
| TCGA-IN-AB1X-01 | 0.049689614 | 0           | 0.076308379 | 0.133511771 | 0           | 0.192711975 |             |
|                 | 0.061772176 | 0.02057132  | 0.11535023  | 0           | 0.059550916 | 0           | 0.009930018 |
|                 | 0.057769342 | 0.047392796 | 0.024425447 | 0.007113081 | 0.08900486  | 0           | 0.031273044 |
|                 | 0           | 0.02362503  |             |             |             |             |             |
| TCGA-BR-8678-01 | 0           | 0           | 0.127937941 | 0           | 0.101995941 | 0.010177556 | 0.107541076 |
|                 | 0.064508103 | 0           | 0.014348172 | 0.060558547 | 0.048984482 | 0.254871845 | 0.159079111 |
|                 | 0           | 0.005261728 | 0           | 0           | 0.0447355   | 0           |             |
| TCGA-D7-6528-01 | 0           | 0           | 0.059263551 | 0           | 0.257782258 | 0           | 0.01882941  |
|                 | 0.092228504 | 0           | 0.034631203 | 0.024431106 | 0.173714291 | 0.057529844 |             |
|                 | 0.100777324 | 0           | 0.052349662 | 0           | 0.128462847 | 0           | 0           |
| TCGA-HU-8238-01 | 0.091341333 | 0           | 0.069273088 | 0.105646376 | 0           | 0.143634218 | 0           |
|                 | 0.010730645 | 0.099267933 | 0           | 0.002582125 | 0           | 0.006430232 | 0.122126253 |
|                 | 0.052853717 | 0.093507665 | 0           | 0.040671758 | 0.094917771 | 0.033739952 | 0.013924613 |
|                 | 0.019352322 |             |             |             |             |             |             |
| TCGA-BR-8367-01 | 0.05259395  | 0           | 0.021298147 | 0.111598675 | 0           | 0.257833042 |             |
|                 | 0.006024756 | 0           | 0.030980132 | 0           | 0.000335486 | 0.000463059 | 0.013266791 |
|                 | 0.060178433 | 0.049030817 | 0.20422016  | 0.056063165 | 0.014745617 | 0.121367769 | 0           |
|                 | 0           | 0           |             |             |             |             |             |
| TCGA-BR-7196-01 | 0.07772718  | 0           | 0.114914416 | 0.186117087 | 0           | 0.122934841 |             |
|                 | 0.051740971 | 0.027584025 | 0.03535269  | 0           | 0.019134881 | 0           | 0.049002709 |
|                 | 0.05586498  | 0.079842259 | 0.114068569 | 0.001267969 | 0.010816287 | 0.053631135 | 0           |
|                 | 0           | 0           |             |             |             |             |             |
| TCGA-FP-7829-01 | 0.079791732 | 0           | 0.007262253 | 0           | 0           | 0.253234381 | 0.028846138 |
|                 | 0.045327687 | 0           | 0.009704346 | 0           | 0.032625595 | 0.232511007 | 0.026647462 |
|                 | 0.194664951 | 0.009411492 | 0.024332637 | 0           | 0.023642099 | 0           | 0.031998221 |
| TCGA-B7-A5TN-01 | 0.084608448 | 0           | 0.038569074 | 0.090220398 | 0           | 0.171398924 | 0           |
|                 | 0.017627558 | 0.113096929 | 0           | 0           | 0.064480552 | 0.070049136 | 0.064367061 |
|                 | 0.164464867 | 0.049049872 | 0           | 0.062518138 | 0           | 0           | 0.009549044 |
| TCGA-VQ-A8E3-01 | 0.088009462 | 0           | 0.080114341 | 0.186726868 | 0           | 0.047809769 |             |
|                 | 0.086169676 | 0.052400799 | 0.059006649 | 0           | 0.053920343 | 0.008977782 | 0           |
|                 | 0.036892883 | 0.055596256 | 0.117700703 | 0.005474191 | 0.082993383 | 0.021123447 | 0           |
|                 | 0           | 0.017083448 |             |             |             |             |             |
| TCGA-CG-5725-01 | 0.089699128 | 0           | 0.087748114 | 0.252002772 | 0           | 0.141115488 |             |
|                 | 0.013198918 | 0.004991404 | 0.075876935 | 0           | 0           | 0.009576336 | 0.019134396 |
|                 | 0.061766834 | 0.066976729 | 0.121039194 | 0.026231334 | 0.003706787 | 0           | 0.026935631 |
|                 | 0           | 0           |             |             |             |             |             |
| TCGA-CG-4305-01 | 0.058690509 | 0           | 0.044180504 | 0.069941635 | 0           | 0.146012236 |             |
|                 | 0.04568164  | 0.073463571 | 0           | 0.028373633 | 0           | 0.050012085 | 0.039286491 |
|                 | 0.046926792 | 0.095813447 | 0.211137991 | 0.007802432 | 0.019986108 | 0.062690928 | 0           |
|                 | 0           | 0           |             |             |             |             |             |

|                 |             |             |             |             |             |             |             |             |
|-----------------|-------------|-------------|-------------|-------------|-------------|-------------|-------------|-------------|
| TCGA-BR-6455-01 | 0           | 0.00820062  | 0.030751162 | 0.255023254 | 0           | 0.124148759 |             |             |
|                 | 0.069729187 | 0.039484877 | 0.077741695 | 0           | 0           | 0.03554254  | 0.058748996 |             |
|                 | 0.101071839 | 0.123023151 | 0.066115103 | 0           | 0.010418816 | 0           | 0           |             |
| TCGA-BR-6802-01 | 0.05559998  | 0           | 0.078080438 | 0.220395283 | 0           | 0.046880891 |             |             |
|                 | 0.095935499 | 0.045282432 | 0.072543446 | 0           | 0.038223214 | 0.007675191 | 0           |             |
|                 | 0.066104574 | 0.056083776 | 0.096624548 | 0.00828972  | 0.073444498 | 0.021837252 | 0           |             |
|                 | 0           | 0.016999258 |             |             |             |             |             |             |
| TCGA-BR-6709-01 | 0.020417821 | 0           | 0.093521316 | 0.163004326 | 0           | 0.180542891 |             |             |
|                 | 0.043770116 | 0.032457142 | 0.042268077 | 0           | 0           | 0.030820827 | 0.02051006  |             |
|                 | 0.062611526 | 0.066005476 | 0.175512088 | 0           | 0.033701594 | 0.021048701 | 0           | 0           |
|                 | 0.01380804  |             |             |             |             |             |             |             |
| TCGA-B7-A5TK-01 | 0.008738849 | 0           | 0.039959708 | 0.19191931  | 0           | 0.12404171  |             |             |
|                 | 0.069066159 | 0.021508748 | 0.058229577 | 0           | 0           | 0.074834149 | 0.017947505 |             |
|                 | 0.007937728 | 0.085012997 | 0.148372238 | 0.012042652 | 0.069817314 | 0.061313568 | 0           |             |
|                 | 0           | 0.009257791 |             |             |             |             |             |             |
| TCGA-CD-A4MH-01 | 0.05260617  | 0           | 0.167150313 | 0.106724755 | 0           | 0.195858129 | 0           |             |
|                 | 0.06388738  | 0.047300086 | 0           | 0.061422004 | 0           | 0.00028745  | 0.064653066 |             |
|                 | 0.082611428 | 0.101234924 | 0           | 0.039063223 | 0           | 0.017201071 |             |             |
| TCGA-BR-6710-01 | 0.002949697 | 0           | 0.224370888 | 0.192807056 | 0           | 0.239834091 | 0           | 0           |
|                 | 0.068948986 | 0.01352983  | 0           | 0.014617742 | 0.004562348 | 0.034530318 |             |             |
|                 | 0.076756564 | 0           | 0.009436767 | 0.116399728 | 0           | 0.001255985 |             |             |
| TCGA-CD-A4MG-01 | 0.128293537 | 0           | 0.042707927 | 0.058478795 | 0           | 0.274543858 | 0           |             |
|                 | 0.015293186 | 0.03544099  | 0           | 0.004243132 | 0           | 0.006439895 | 0.090087452 |             |
|                 | 0.075521872 | 0.1457829   | 0.077326226 | 0           | 0           | 0.028709447 | 0.017130783 |             |
| TCGA-D7-6522-01 | 0.086639486 | 0           | 0.069059283 | 0.167010314 | 0           | 0.077979373 |             |             |
|                 | 0.046165455 | 0.041610032 | 0.053729918 | 0           | 0           | 0.01598697  | 0.033607826 |             |
|                 | 0.009668454 | 0.055005571 | 0.146176855 | 0.079958342 | 0.008749538 | 0.085690924 | 0           |             |
|                 | 0.016630472 | 0.006331189 |             |             |             |             |             |             |
| TCGA-F1-6177-01 | 0           | 0           | 0.098351366 | 0           | 0.302741604 | 0.030570173 | 0.046366254 |             |
|                 | 0.044382948 | 0           | 0.004528828 | 0.015326784 | 0.000521316 | 0.080749858 | 0.073803487 |             |
|                 | 0.147082177 | 0           | 0.029743989 | 0           | 0.125831217 | 0           | 0           |             |
| TCGA-BR-4201-01 | 0.010372687 | 0.006031281 | 0.040130754 | 0           | 0           | 0.243697893 |             |             |
|                 | 0.063078103 | 0.024639822 | 0.014651237 | 0           | 0.031541243 | 0.013493414 |             |             |
|                 | 0.027537805 | 0.076062116 | 0.226303336 | 0.020092351 | 0.033393358 | 0           | 0.040290378 |             |
|                 | 0.060096605 | 0.068587618 |             |             |             |             |             |             |
| TCGA-BR-4361-01 | 0           | 0           | 0.053571137 | 0.057660399 | 0           | 0.234363943 | 0.129462039 |             |
|                 | 0.05251404  | 0           | 0           | 0.04476533  | 0.016079578 | 0           | 0.088170225 | 0.167700406 |
|                 | 0.04470309  | 0.024618213 | 0.065733944 | 0           | 0.020657656 | 0           |             |             |
| TCGA-FP-8209-01 | 0.180340721 | 0           | 0.000742071 | 0.156660022 | 0           | 0.210202528 |             |             |
|                 | 0.029844247 | 0.023498739 | 0.046693717 | 0           | 0           | 0.002216952 | 0.014106218 |             |
|                 | 0.053635657 | 0.130490583 | 0.031495559 | 0.028153935 | 0.09088199  | 0           | 0.001037062 |             |
|                 | 0           |             |             |             |             |             |             |             |
| TCGA-FP-8210-01 | 0.101277949 | 0.053541501 | 0.058428213 | 0.133495197 | 0           | 0.144503383 |             |             |
|                 | 0.009127026 | 0.044497781 | 0.069996222 | 0.013687676 | 0           | 0.001466645 | 0.008805303 |             |

|                 |             |             |             |             |             |             |               |
|-----------------|-------------|-------------|-------------|-------------|-------------|-------------|---------------|
|                 | 0.023092217 | 0.042858735 | 0.105189411 | 0.040743642 | 0.043629426 | 0.101198085 | 0             |
|                 | 0.001062242 | 0.003399348 |             |             |             |             |               |
| TCGA-HU-8604-01 | 0           | 0.009759799 | 0.102037731 | 0.088128847 | 0           | 0.25452787  |               |
|                 | 0.033197814 | 0.034986803 | 0.020417948 | 0.000999489 | 0           | 0.077524338 | 0.014128511   |
|                 | 0.133571718 | 0.068303566 | 0.10161954  | 0           | 0.04545173  | 0.015344298 | 0 0 0         |
| TCGA-CG-4301-01 | 0.060017094 | 0           | 0           | 0.008688354 | 0           | 0.299731751 | 0.016559599   |
|                 | 0.019110029 | 0.014321707 | 0           | 0           | 0           | 0.015874647 | 0.090237383   |
|                 | 0.165784698 | 0.08108089  | 0.019767855 | 0.052050802 | 0.019041213 | 0.048439889 |               |
|                 | 0.014583083 |             |             |             |             |             |               |
| TCGA-RD-A8N1-01 | 0.09762345  | 0           | 0.090610263 | 0.102449337 | 0           | 0.218874723 |               |
|                 | 0.028542162 | 0.037883465 | 0.055584783 | 0           | 0.003912826 | 0.003414656 | 0.0254948     |
|                 | 0.04352485  | 0.080310177 | 0.103587347 | 0.065732317 | 0.006982865 | 0.027153852 | 0             |
|                 | 0.008318126 | 0           |             |             |             |             |               |
| TCGA-BR-A44U-01 | 0.080246281 | 0           | 0           | 0.045795953 | 0           | 0.183114069 | 0 0.003956368 |
|                 | 0.114384592 | 0           | 0           | 0.086209547 | 0.002263468 | 0.121716826 | 0.089422423   |
|                 | 0.107966347 | 0.095817226 | 0           | 0.069106901 | 0           | 0           | 0             |
| TCGA-CG-4469-01 | 0.002207709 | 0           | 0.010266898 | 0           | 0           | 0.286098035 | 0 0.001166283 |
|                 | 0.010307111 | 0.000397013 | 0.029647684 | 0           | 0.015500152 | 0.084624346 | 0.040086102   |
|                 | 0.2354395   | 0.024976684 | 0.07427698  | 0           | 0.074222651 | 0.003012208 | 0.107770644   |
| TCGA-VQ-A8PH-01 | 0.089931887 | 0           | 0.105806542 | 0.152304698 | 0           | 0.252285327 |               |
|                 | 0.052220059 | 0.056045253 | 0.075081421 | 0           | 0           | 0           | 0.048852168   |
|                 | 0.021673185 | 0.077683392 | 0           | 0.022145013 | 0           | 0           | 0             |
| TCGA-D7-8576-01 | 0           | 0.017396595 | 0.075127644 | 0.038705219 | 0           | 0.176547936 |               |
|                 | 0.009542832 | 0.026809354 | 0.036485638 | 0           | 0           | 0.009810914 | 0 0.167422441 |
|                 | 0.037063255 | 0.173422637 | 0.061336143 | 0.029275127 | 0.121255329 | 0           | 0             |
|                 | 0.019798937 |             |             |             |             |             |               |
| TCGA-VQ-AA6K-01 | 0.062996404 | 0           | 0.106892133 | 0.168196907 | 0           | 0.233428743 |               |
|                 | 0.030736489 | 0.033310891 | 0.043229097 | 0           | 0           | 0.020170403 | 0.002027532   |
|                 | 0.068168092 | 0.055734277 | 0.069086698 | 0.029563462 | 0.010318385 | 0.066140488 | 0             |
|                 | 0           | 0           |             |             |             |             |               |
| TCGA-HU-8602-01 | 0.020169911 | 0           | 0.037963224 | 0.06121475  | 0           | 0.267063696 |               |
|                 | 0.112794831 | 0.00607821  | 0.020558025 | 0           | 0.023641853 | 0.006032995 | 0.00910667    |
|                 | 0.137943637 | 0.078815664 | 0.109255204 | 0           | 0.047137837 | 0           | 0 0.006015363 |
|                 | 0.05620813  |             |             |             |             |             |               |
| TCGA-BR-8485-01 | 0.063068343 | 0           | 0.104222845 | 0.185980334 | 0           | 0.202498272 |               |
|                 | 0.060586334 | 0.006075103 | 0.052711137 | 0           | 0.006572717 | 0.005052512 | 0.009391152   |
|                 | 0.059306744 | 0.048859978 | 0.062469246 | 0.070444981 | 0.008626011 | 0.046629382 | 0             |
|                 | 0.007504907 | 0           |             |             |             |             |               |
| TCGA-VQ-A8E7-01 | 0           | 0           | 0           | 0.007446165 | 0           | 0.293065059 | 0.010376625   |
|                 | 0.015078308 | 0           | 0.022014978 | 0           | 0           | 0.259250971 | 0.080992814   |
|                 | 0.018481057 | 0.067171082 | 0.021866883 | 0.004768799 | 0.027466944 |             |               |
| TCGA-HU-A4GJ-01 | 0.180074136 | 0.023548048 | 0.142842815 | 0.156351803 | 0           | 0.131154964 |               |
|                 | 0.031426378 | 0.084040946 | 0.049861117 | 0.000515188 | 0           | 0           | 0 0.024955965 |
|                 | 0.024016772 | 0.067255749 | 0.018476743 | 0.040255965 | 0.014758386 | 0.010465025 | 0             |

0

|                 |             |             |             |             |             |             |             |             |
|-----------------|-------------|-------------|-------------|-------------|-------------|-------------|-------------|-------------|
| TCGA-BR-8686-01 | 0.112265854 | 0           | 0.112010227 | 0.161995154 | 0           | 0.154903621 |             |             |
|                 | 0.037136848 | 0.025457733 | 0.041804517 | 0           | 0           | 0.015159432 | 0.025338068 |             |
|                 | 0.014026861 | 0.078800835 | 0.128362319 | 0           | 0.021441526 | 0.071297005 | 0           | 0           |
| TCGA-BR-8589-01 | 0.038652805 | 0           | 0.036806517 | 0.251213903 | 0           | 0.025942688 |             |             |
|                 | 0.069236699 | 0.073215379 | 0.04498492  | 0           | 0           | 0.040609258 | 0.01112393  |             |
|                 | 0.039569286 | 0.093474885 | 0.108383944 | 0.11015151  | 0.00683516  | 0.046393631 | 0           |             |
|                 | 0.002301203 | 0.00110428  |             |             |             |             |             |             |
| TCGA-RD-A8N6-01 | 0.045862305 | 0           | 0           | 0.081066734 | 0           | 0.21067102  | 0           | 0           |
|                 | 0.116889132 | 0           | 0           | 0.100919606 | 0.007798166 | 0.07135486  | 0.108712155 |             |
|                 | 0.162660342 | 0.024067768 | 0.003420922 | 0.060347147 | 0           | 0.006229843 | 0           |             |
| TCGA-D7-6524-01 | 0.024579033 | 0           | 0           | 0.037376424 | 0           | 0.212936102 | 0           | 0.018330005 |
|                 | 0.067785219 | 0           | 0.034958248 | 0           | 0.009967885 | 0.086296866 | 0.040178197 |             |
|                 | 0.090767502 | 0.068240311 | 0.01506407  | 0           | 0.176303728 | 0.032053102 | 0.085163309 |             |
| TCGA-CG-5722-01 | 0.098220486 | 0           | 0.084196261 | 0.234321924 | 0           | 0.076443086 |             |             |
|                 | 0.042979525 | 0.059436359 | 0.049586165 | 0           | 0           | 0.026095939 | 0.018714171 |             |
|                 | 0.023163455 | 0.043504462 | 0.070235489 | 0.040036672 | 0.04689639  | 0.059865839 | 0           |             |
|                 | 0.026303775 | 0           |             |             |             |             |             |             |
| TCGA-BR-8486-01 | 0.053832953 | 0           | 0.058006937 | 0           | 0           | 0.333140737 | 0.05318734  |             |
|                 | 0.036046817 | 0.07103081  | 0           | 0           | 0.008586741 | 0.018697386 | 0.114559337 |             |
|                 | 0.057166415 | 0.085273011 | 0.038441338 | 0.050567553 | 0.020768752 | 0           | 0.000693873 |             |
|                 | 0           |             |             |             |             |             |             |             |
| TCGA-VQ-A8PE-01 | 0.125205954 | 0           | 0.092844829 | 0.122119325 | 0           | 0.202489025 |             |             |
|                 | 0.069798378 | 0.054890096 | 0.043678661 | 0           | 0           | 0.000232205 | 0.01020293  |             |
|                 | 0.078762902 | 0.051931892 | 0.053018719 | 0.063084084 | 0.031740999 | 0           | 0           | 0           |
| TCGA-CD-8535-01 | 0.089919669 | 0           | 0           | 0.119263918 | 0           | 0.134016223 | 0.029066598 |             |
|                 | 0.037312193 | 0.107049    | 0           | 0.025738547 | 0           | 0           | 0.253042659 | 0.083769817 |
|                 | 0.120821377 | 0           | 0           | 0           | 0           | 0           |             |             |
| TCGA-BR-A4J5-01 | 0.076401821 | 0           | 0.033089044 | 0.109965258 | 0           | 0.210872679 |             |             |
|                 | 0.030329752 | 0           | 0.07077948  | 0           | 0.009105966 | 0           | 0.01446537  | 0.098028984 |
|                 | 0.040232366 | 0.125000571 | 0.077459038 | 0.005075457 | 0.090371094 | 0.000833927 | 0           |             |
|                 | 0.007989191 |             |             |             |             |             |             |             |
| TCGA-CD-5798-01 | 0           | 0           | 0.0065835   | 0.168358437 | 0           | 0.222155208 | 0.008706037 | 0           |
|                 | 0.074473194 | 0           | 0           | 0.041222092 | 0.086980075 | 0.015144568 | 0.03984027  |             |
|                 | 0.183775331 | 0.060612114 | 0.032583772 | 0.059298167 | 0.000267234 | 0           | 0           |             |
| TCGA-ZQ-A9CR-01 | 0.002909797 | 0           | 0.111054147 | 0.144713    | 0           | 0.185720721 | 0.084646919 |             |
|                 | 0.020933535 | 0.011818369 | 0           | 0.005150961 | 0.027288128 | 0.020040485 | 0.084840496 |             |
|                 | 0.081444045 | 0.09326874  | 0.013784644 | 0.041309404 | 0           | 0.033631236 | 0           |             |
|                 | 0.037445375 |             |             |             |             |             |             |             |
| TCGA-D7-6527-01 | 0.091374417 | 0           | 0.185660019 | 0.030089481 | 0           | 0.274310498 | 0           | 0           |
|                 | 0.005074814 | 0           | 0           | 0.011887469 | 0.053684029 | 0.123280754 | 0.081392436 |             |
|                 | 0.00306835  | 0.021291734 | 0           | 0.06508871  | 0.017753079 | 0           | 0.036044209 |             |
| TCGA-BR-8289-01 | 0.003499351 | 0.006343597 | 0.047797126 | 0.032776668 | 0           | 0.18173342  |             |             |
|                 | 0           | 0           | 0.046265182 | 0.072007037 | 0           | 0.04153252  | 0           | 0.125521459 |
|                 |             |             |             |             |             | 0.070653814 |             |             |

|                 |             |             |             |             |             |             |             |
|-----------------|-------------|-------------|-------------|-------------|-------------|-------------|-------------|
|                 | 0.173540911 | 0.045652548 | 0.000523045 | 0.152153322 | 0           | 0           | 0           |
| TCGA-BR-6801-01 | 0.062300986 | 0           | 0           | 0.108229019 | 0           | 0.213937957 | 0.014442014 |
|                 | 0.026552672 | 0.064109581 | 0           | 0.030164111 | 0.010449325 | 0.020333227 | 0.183169702 |
|                 | 0.042057717 | 0.151977682 | 0           | 0.045696967 | 0           | 0.026579039 | 0           |
| TCGA-CG-5734-01 | 0.049816322 | 0           | 0.145195368 | 0.106032114 | 0           | 0.150821699 |             |
|                 | 0.074407788 | 0.010201764 | 0.062492782 | 0           | 0.005295875 | 0           | 0.008689427 |
|                 | 0.075216454 | 0.046537621 | 0.109277116 | 0.033372322 | 0.024673222 | 0.018068676 | 0           |
|                 | 0.044688998 | 0.035212451 |             |             |             |             |             |
| TCGA-R5-A805-01 | 0           | 0           | 0.042696947 | 0.054822353 | 0           | 0.209170618 | 0.001406025 |
|                 | 0.056757239 | 0           | 0           | 0.020333325 | 0.031786908 | 0.110044848 | 0.02617387  |
|                 | 0.13331741  | 0           | 0.068983399 | 0           | 0.103898189 | 0.01750534  | 0.12310353  |
| TCGA-3M-AB46-01 | 0.070882004 | 0           | 0.00750038  | 0.050820772 | 0           | 0.310964671 | 0           |
|                 | 0.033030144 | 0.080956389 | 0           | 0           | 0.044217562 | 0.153071931 | 0.096950851 |
|                 | 0.075120005 | 0.058190661 | 0.001037085 | 0.016774351 | 0           | 0           | 0.000483192 |
| TCGA-CG-5716-01 | 0.06776311  | 0.055009802 | 0.225389983 | 0.074254522 | 0           | 0.230650526 |             |
|                 | 0           | 0           | 0.112642507 | 0           | 0.028700009 | 0           | 0           |
|                 |             |             |             |             |             | 0.009827932 | 0.013004816 |
|                 | 0.060547224 | 0.035905718 | 0.025288424 | 0.001057917 | 0.046624847 | 0           | 0.013332662 |
| TCGA-BR-4253-01 | 0.020863632 | 0           | 0.030985525 | 0.187313068 | 0           | 0.0240128   |             |
|                 | 0.170898683 | 0.044350201 | 0.023770515 | 0.021111475 | 0.001111794 | 0.007755213 |             |
|                 | 0.00565227  | 0.076624619 | 0.097597534 | 0.166098638 | 0.007593744 | 0.043030951 |             |
|                 | 0.042687    | 0           | 0.028542339 |             |             |             |             |
| TCGA-BR-8058-01 | 0.051209376 | 0           | 0.067092212 | 0.155104606 | 0           | 0.169452882 |             |
|                 | 0.054711893 | 0           | 0.080813726 | 0           | 0           | 0.026081407 | 0.003519134 |
|                 |             |             |             |             |             | 0.073672747 |             |
|                 | 0.065327824 | 0.110738026 | 0.039701645 | 0.008432261 | 0.059093455 | 0           | 0.003827236 |
|                 | 0.031221569 |             |             |             |             |             |             |
| TCGA-VQ-A8P3-01 | 0.045960014 | 0           | 0.017090162 | 0.248610753 | 0           | 0.136093389 |             |
|                 | 0.079113625 | 0.068818949 | 0.074375795 | 0           | 0           | 0.059974303 | 0.002987561 |
|                 | 0.071154403 | 0.034762499 | 0.066177301 | 0.012140326 | 0.01023712  | 0.071033351 | 0           |
|                 | 0           | 0.001470448 |             |             |             |             |             |
| TCGA-HU-A4H3-01 | 0.041512408 | 0           | 0.043983399 | 0.178130655 | 0           | 0.118783469 |             |
|                 | 0.091545477 | 0.032312162 | 0.053567922 | 0           | 0.009742675 | 0.015473859 | 0           |
|                 | 0.072916796 | 0.058169023 | 0.117444139 | 0           | 0.033984685 | 0           | 0.092377979 |
|                 | 0.016179627 | 0.023875724 |             |             |             |             |             |
| TCGA-BR-4267-01 | 0           | 0.004956547 | 0.066561029 | 0.052668932 | 0           | 0.314751561 |             |
|                 | 0.035202524 | 0.007070155 | 0.032474034 | 0           | 0.006176673 | 0           | 0           |
|                 |             |             |             |             |             | 0.06867218  |             |
|                 | 0.048883658 | 0.168839296 | 0.028144854 | 0.022997693 | 0           | 0.055473689 | 0           |
|                 | 0.087127173 |             |             |             |             |             |             |
| TCGA-VQ-A8E2-01 | 0.081079461 | 0           | 0.040559977 | 0.143026503 | 0           | 0.244765383 |             |
|                 | 0.06366392  | 0.075950492 | 0.014785323 | 0           | 0           | 0.038862705 | 0.006568553 |
|                 | 0.109214867 | 0.067735198 | 0.044329031 | 0.033402343 | 0.00520027  | 0.030855972 | 0           |
|                 | 0           | 0           |             |             |             |             |             |
| TCGA-MX-A5UG-01 | 0.073870825 | 0.091396841 | 0.080013087 | 0.037168602 | 0           | 0.266834949 |             |
|                 | 0.04991391  | 0.025084302 | 0.041263396 | 0.022276167 | 0.00030357  | 0           | 0.001762872 |
|                 | 0.008998049 | 0.037230394 | 0.100434961 | 0.049589405 | 0.033892619 | 0.029840345 |             |

0.018001405 0 0.032124301  
 TCGA-RD-A8N4-01 0.09518411 0 0.062679657 0.154947837 0 0.195430154  
 0.007385865 0.017754566 0.051031732 0 0 0.043326911 0.015520609 0  
 0.093654763 0.151411909 0.022842929 0.012450528 0.07637843 0 0 0  
 TCGA-IN-A6RJ-01 0.001762989 0.026899225 0.081691674 0.13075411 0 0.169206774  
 0 0.023467434 0.121403155 0 0.021425076 0.029263589 0.022152728  
 0.001464255 0.067043576 0.088898513 0.106017056 0.048650696 0.055546915 0  
 0 0.004352234  
 TCGA-CG-5723-01 0 0.050132022 0.068738069 0.158839346 0 0.148193782  
 0.063283875 0.022186755 0.00594153 0 0.004747348 0.033184333 0.049285474  
 0.008720108 0.076563257 0.144414896 0.032397456 0.073183889 0 0.014815383  
 0.010111601 0.035260876  
 TCGA-F1-6874-01 0.022788418 0 0 0.047732303 0 0.306996961 0.057054323 0  
 0.020107246 0 0.079116079 0 0.00901448 0.170782532 0.065112296  
 0.094832849 0 0.023806869 0 0.017105801 0 0.085549845  
 TCGA-CG-4304-01 0.0436772 0 0.140099487 0.051786486 0 0.191306323  
 0.064034683 0.023919894 0.002841763 0 0.02790871 0 0 0.081394499  
 0.05884794 0.152632914 0 0.01855823 0.023872386 0.011364895 0.019460774  
 0.088293817  
 TCGA-VQ-A923-01 0.077622368 0 0.071529264 0.203011362 0 0.17714117  
 0.058697534 0.047720387 0.056185735 0 0.007979799 0.004603422 0.013966452  
 0.056814245 0.081566882 0.057064601 0.051550409 0.005787343 0.028759025 0  
 0 0  
 TCGA-VQ-A8PF-01 0.047996751 0 0.077122973 0.0952698 0 0.22854877  
 0.036331565 0.050679122 0.001448848 0 0.031710784 0.018643531 0.017238759  
 0.005611812 0.088553933 0.167328852 0.049081149 0.044317081 0.040116269 0  
 0 0  
 TCGA-BR-8361-01 0.018875261 0 0.037177322 0.245208326 0 0.125425391  
 0.05739294 0.052416666 0.097316401 0 0 0.035831601 0 0.025890726  
 0.078354921 0.086583438 0.037397782 0.051681612 0.019491178 0 0.004466393  
 0.026490039  
 TCGA-BR-8690-01 0.012804149 0 0.070237261 0.216887673 0 0.095019462  
 0.089452556 0.025206348 0.051835619 0 0 0.046893339 0 0.090531278  
 0.076555121 0.126918469 0.022838184 0.020558971 0.051487193 0 0  
 0.002774377  
 TCGA-HJ-7597-01 0.052635394 0.031127087 0.045524708 0.235987963 0 0.046016263  
 0.081529419 0.057651441 0.038810743 0 0 0.063394365 0 0.046013867  
 0.107693344 0.062319806 0.012559698 0.036798658 0.056483834 0 0  
 0.02545341  
 TCGA-RD-A7BT-01 0.072568882 0 0.07393381 0.102171294 0 0.221534048  
 0.053686771 0.050524226 0.066541356 0 0 0.051258072 0 0.021072003  
 0.051954236 0.08120924 0.093155157 0 0.034073534 0 0 0.026317372  
 TCGA-MX-A5UJ-01 0.076636779 0 0.066850595 0.09997844 0 0.191848845  
 0.060917472 0.06076309 0.029885483 0 0 0.019122135 0.018307701

|                 |             |             |             |             |             |             |             |             |
|-----------------|-------------|-------------|-------------|-------------|-------------|-------------|-------------|-------------|
|                 | 0.069876581 | 0.07370788  | 0.111665484 | 0           | 0.014662518 | 0.093144827 | 0           | 0           |
|                 | 0.012632171 |             |             |             |             |             |             |             |
| TCGA-VQ-A91Q-01 | 0.115727297 | 0           | 0.130987114 | 0.003931584 | 0           | 0.3135603   | 0           | 0           |
|                 | 0.098432642 | 0           | 0.008727197 | 0.004201297 | 0           | 0.105271575 | 0.071015246 |             |
|                 | 0.0801284   | 0           | 0.051346939 | 0.00799559  | 0.008674818 | 0           | 0           |             |
| TCGA-D7-5578-01 | 0.076076707 | 0           | 0.140715209 | 0.139269365 | 0           | 0.146244316 |             |             |
|                 | 0.043958636 | 0.030927142 | 0.045023512 | 0           | 0.014037996 | 0.002850297 | 0.030825527 |             |
|                 | 0.103255504 | 0.051901022 | 0.084437555 | 0.029970704 | 0.01233399  | 0.038364118 | 0           |             |
|                 | 0           | 0.009808399 |             |             |             |             |             |             |
| TCGA-SW-A7EB-01 | 0.143097659 | 0           | 0.0713976   | 0.173110466 | 0           | 0.21966566  |             |             |
|                 | 0.022590463 | 0.058476061 | 0.057977806 | 0           | 0           | 0.030904422 | 0.007548443 |             |
|                 | 0.029187949 | 0.041182548 | 0.072488996 | 0.020438516 | 0.040028387 | 0.011905026 | 0           |             |
|                 | 0           | 0           |             |             |             |             |             |             |
| TCGA-HU-A4GU-01 | 0.054724555 | 0           | 0           | 0.089595219 | 0           | 0.298865712 | 0.048811145 |             |
|                 | 0.061873124 | 0.05195174  | 0           | 0           | 0.034159569 | 0           | 0.155957716 | 0.050961701 |
|                 | 0.132574042 | 0           | 0.006212532 | 0           | 0           | 0           | 0.014312946 |             |
| TCGA-D7-6521-01 | 0.101945852 | 0           | 0.07096759  | 0.160753572 | 0           | 0.151778378 | 0           | 0           |
|                 | 0.086173546 | 0           | 0.011003794 | 0           | 0.020969109 | 0.107406503 | 0.060210476 |             |
|                 | 0.140768512 | 0.004553464 | 0.001071593 | 0.050875236 | 0.019127881 | 0           | 0.012394494 |             |
| TCGA-IN-AB1V-01 | 0.033273049 | 0.103071188 | 0.112812346 | 0.094220999 | 0           | 0.316793808 |             |             |
|                 | 0           | 0.002398643 | 0.048962701 | 0           | 0.027295179 | 0.0328958   | 0.043878325 |             |
|                 | 0.051161852 | 0.028920826 | 0           | 0           | 0.046872613 | 0.050664949 | 0           | 0           |
| TCGA-HF-7134-01 | 0.013995276 | 0           | 0.141452957 | 0.062093919 | 0           | 0.249659241 |             |             |
|                 | 0.016432792 | 0           | 0.064807324 | 0           | 0.051966037 | 0           | 0           | 0.122084346 |
|                 | 0.116774153 | 0           | 0.047989373 | 0           | 0.0395335   | 0           | 0.044543654 | 0.028667428 |
| TCGA-CD-A48C-01 | 0.043304746 | 0           | 0.073474881 | 0.143376959 | 0           | 0.108517861 |             |             |
|                 | 0.028011122 | 0.034100007 | 0.054608524 | 0.012964005 | 0           | 0.037462013 | 0           |             |
|                 | 0.119518182 | 0.082882928 | 0.121141218 | 0.053112474 | 0.002633276 | 0           | 0.075805322 |             |
|                 | 0           | 0.009086483 |             |             |             |             |             |             |
| TCGA-HU-8610-01 | 0           | 0           | 0.012627831 | 0.019492665 | 0           | 0.220642366 | 0.016466386 |             |
|                 | 0.06538453  | 0.12807348  | 0           | 0.063586239 | 0           | 0.022213846 | 0.106005161 |             |
|                 | 0.017317044 | 0.066599838 | 0           | 0.116675429 | 0           | 0.116202552 | 0           | 0.028712631 |
| TCGA-BR-8373-01 | 0.039361448 | 0           | 0.017734269 | 0.059282917 | 0           | 0.317382729 |             |             |
|                 | 0.037333524 | 0           | 0.083212029 | 0           | 0.005153948 | 0.001191267 | 0.050216395 |             |
|                 | 0.073513267 | 0.074026051 | 0.076483577 | 0.071068253 | 0.026160801 | 0.052821287 | 0           |             |
|                 | 0           | 0.015058238 |             |             |             |             |             |             |
| TCGA-EQ-8122-01 | 0.116305299 | 0           | 0           | 0.048194412 | 0           | 0.083089697 | 0.00069253  |             |
|                 | 0.005812795 | 0.082435498 | 0           | 0.000293214 | 0.012739349 | 0           | 0.263813474 |             |
|                 | 0.030108985 | 0.186977573 | 0           | 0.085719425 | 0.019992723 | 0           | 0           | 0.063825026 |
| TCGA-B7-5818-01 | 0.038389167 | 0           | 0.024114025 | 0.172428086 | 0           | 0.121208717 |             |             |
|                 | 0.087584205 | 0.03158057  | 0.063436381 | 0           | 0.014952794 | 0.016438075 | 0.018868502 |             |
|                 | 0.138235889 | 0.092050193 | 0.153526963 | 0.009207478 | 0           | 0           | 0           | 0.001563312 |
|                 | 0.016415641 |             |             |             |             |             |             |             |
| TCGA-D7-A6F2-01 | 0.051301253 | 0           | 0.06962932  | 0.080858872 | 0           | 0.239544386 |             |             |

|                 |             |             |             |             |             |             |             |             |             |
|-----------------|-------------|-------------|-------------|-------------|-------------|-------------|-------------|-------------|-------------|
|                 | 0.009257013 | 0           | 0.075008575 | 0           | 0           | 0.027897536 | 0.008434567 | 0.136229371 |             |
|                 | 0.061637598 | 0.154687628 | 0.005930227 | 0.002251019 | 0.027725442 | 0           | 0.049607192 |             |             |
|                 | 0           |             |             |             |             |             |             |             |             |
| TCGA-RD-A7C1-01 | 0.02918694  | 0           | 0.074104668 | 0.172287708 | 0           | 0.105174491 |             |             |             |
|                 | 0.058415475 | 0.03551658  | 0.063398284 | 0           | 0           | 0.032779079 | 0.008235187 |             |             |
|                 | 0.080112192 | 0.066824045 | 0.133437104 | 0.017751624 | 0.015401246 | 0           | 0.028864517 |             |             |
|                 | 0.018423872 | 0.060086989 |             |             |             |             |             |             |             |
| TCGA-HF-7131-01 | 0.027226605 | 0           | 0.062160506 | 0.11392439  | 0           | 0.261849701 |             |             |             |
|                 | 0.040378894 | 0           | 0.079089541 | 0           | 0.046924335 | 0           | 0.013059476 | 0.117267317 |             |
|                 | 0.035867697 | 0.107359222 | 0           | 0.02033544  | 0.004747523 | 0.017419273 | 0           |             |             |
|                 | 0.05239008  |             |             |             |             |             |             |             |             |
| TCGA-CD-5799-01 | 0.051670519 | 0           | 0.056970115 | 0.071463516 | 0           | 0.150071736 | 0           | 0           |             |
|                 | 0.063981839 | 0           | 0           | 0.067850942 | 0.004089239 | 0.164075673 | 0.048030854 |             |             |
|                 | 0.173051005 | 0.001018216 | 0.028198409 | 0           | 0.083808237 | 0           | 0.035719699 |             |             |
| TCGA-VQ-A91S-01 | 0.069185442 | 0           | 0           | 0.206025923 | 0           | 0.152303087 | 0.109058489 |             |             |
|                 | 0.004591907 | 0.047902414 | 0           | 0.029464601 | 0           | 0           | 0.091749192 | 0.116883825 |             |
|                 | 0.105056701 | 0.011663712 | 0           | 0           | 0           | 0.017914311 | 0.038200398 |             |             |
| TCGA-HU-A4GY-01 | 0.102486673 | 0.05322413  | 0.020036875 | 0.158652585 | 0           | 0.148577981 |             |             |             |
|                 | 0.054036956 | 0.015459858 | 0.070920182 | 0           | 0           | 0.003223679 | 0.011380701 |             |             |
|                 | 0.022852209 | 0.063969733 | 0.165277726 | 0.047890022 | 0.022445779 | 0.039564912 | 0           |             |             |
|                 | 0           | 0           |             |             |             |             |             |             |             |
| TCGA-HU-8608-01 | 0.004906528 | 0.005415309 | 0.102027995 | 0.14880993  | 0           | 0.115372387 |             |             |             |
|                 | 0.072005233 | 0.056274073 | 0.068080538 | 0           | 0.014716618 | 0.017528653 | 0.00638065  |             |             |
|                 | 0.079741772 | 0.10458507  | 0.112672082 | 0.016908499 | 0.052774175 | 0.008134067 | 0           |             |             |
|                 | 0           | 0.013666423 |             |             |             |             |             |             |             |
| TCGA-CD-A489-01 | 0.083483844 | 0.040568905 | 0.020930825 | 0.184378779 | 0           | 0.224623765 |             |             |             |
|                 | 0.02860917  | 0           | 0.03506631  | 0           | 0           | 0.003058982 | 0.017746861 | 0           | 0.068406547 |
|                 | 0.152073535 | 0.063638848 | 0.003768792 | 0.06843598  | 0           | 0.005208856 | 0           |             |             |
| TCGA-BR-6566-01 | 0           | 0           | 0.098873487 | 0.128809922 | 0           | 0.158828257 | 0.009600075 |             |             |
|                 | 0.034727825 | 0.054445847 | 0           | 0           | 0.083304033 | 0           | 0.1669948   | 0.060984248 |             |
|                 | 0.119353655 | 0.039679209 | 0.002186901 | 0.033964791 | 0           | 0           | 0.008246949 |             |             |
| TCGA-BR-A4J6-01 | 0.054571588 | 0           | 0.238295414 | 0.129588949 | 0           | 0.197797681 |             |             |             |
|                 | 0.005671503 | 0.046996937 | 0.043359602 | 0           | 0           | 0.04078285  | 0.0000861   |             |             |
|                 | 0.029993038 | 0.015140445 | 0.089078615 | 0.031708868 | 0.028333789 | 0.048594577 | 0           |             |             |
|                 | 0           | 0           |             |             |             |             |             |             |             |
| TCGA-BR-8286-01 | 0.019033802 | 0           | 0           | 0.165497361 | 0           | 0.142838334 | 0.031694665 |             |             |
|                 | 0.026309803 | 0.098935646 | 0           | 0           | 0.027351599 | 0.025857735 | 0.015007277 |             |             |
|                 | 0.05687104  | 0.153428369 | 0.09497647  | 0.030613704 | 0.068994399 | 0.03634786  | 0           |             |             |
|                 | 0.006241938 |             |             |             |             |             |             |             |             |
| TCGA-CD-8529-01 | 0.102765746 | 0           | 0.106232325 | 0.120161727 | 0           | 0.128550623 |             |             |             |
|                 | 0.054081455 | 0.037792768 | 0.054177182 | 0           | 0.006968375 | 0           | 0.012207429 |             |             |
|                 | 0.1129005   | 0.063264824 | 0.134272595 | 0.021291182 | 0.007265363 | 0.023555746 | 0           |             |             |
|                 | 0           | 0.014512159 |             |             |             |             |             |             |             |

Table-S5(QUANTISEQ): Infiltration level of tumor associated immune cells in STAD estimated by using quanTiseq algorithms.

| sample          | GNAI2       | B.cell      | Macrophage.M1 | Macrophage.M2 | Monocyte | Neutrophil  | NK.cell     | T.cell.CD4...non.regulatory. | T.cell.CD8. | T.cell.regulatory..Tregs. | Myeloid.dendritic.cell | uncharacterized.cell |
|-----------------|-------------|-------------|---------------|---------------|----------|-------------|-------------|------------------------------|-------------|---------------------------|------------------------|----------------------|
| TCGA-3M-AB46-01 | 6.6636      | 0.006818342 | 0.029134387   | 0.004418631   | 0        | 0.003667742 | 0.003008207 | 0.000560507                  | 0           | 0.006276202               | 0.009460178            | 0.936655804          |
| TCGA-3M-AB47-01 | 6.9428      | 0.019340921 | 0.017484758   | 0.028176075   | 0        | 0.021320546 | 0.011866398 | 0.027384764                  | 0.000644233 | 0.007936378               | 0                      | 0.865845927          |
| TCGA-B7-5816-01 | 8.2327      | 0.000073    | 0.494718502   | 0             | 0        | 0           | 0.004869668 | 0                            | 0.002049356 | 0.036734979               | 0                      | 0.461554539          |
| TCGA-B7-5818-01 | 8.1687      | 0.007471365 | 0.085979684   | 0.007286443   | 0        | 0.016781561 | 0.013560076 | 0.000479441                  | 0.015498631 | 0.003065656               | 0                      | 0.849877143          |
| TCGA-B7-A5TI-01 | 7.4201      | 0.020726224 | 0.036212361   | 0.028110943   | 0        | 0.065728961 | 0.00953128  | 0                            | 0.001663801 | 0.012383895               | 0                      | 0.825642536          |
| TCGA-B7-A5TJ-01 | 6.4226      | 0.0079016   | 0.007516698   | 0.013521682   | 0        | 0.028098167 | 0.007651604 | 0.002600977                  | 0           | 0.004432349               | 0.002083054            | 0.926193869          |
| TCGA-B7-A5TK-01 | 7.6421      | 0.007781704 | 0.087309104   | 0.039510258   | 0        | 0.046159299 | 0.00140233  | 0                            | 0.090873268 | 0.014712355               | 0                      | 0.712251681          |
| TCGA-B7-A5TN-01 | 7.9469      | 0.014703562 | 0.076715162   | 0.014106935   | 0        | 0           | 0.008772765 | 0                            | 0.001126329 | 0.015808318               | 0                      | 0.868766928          |
| TCGA-BR-4187-01 | 7.8052      | 0.023691424 | 0.017534172   | 0.10084929    | 0        | 0.027431624 | 0.009666374 | 0.031816901                  | 0.010253815 | 0.007554691               | 0.002809835            | 0.768391874          |
| TCGA-BR-4191-01 | 8.0292      | 0.027919584 | 0.097184723   | 0.084860809   | 0        | 0.054170148 | 0.005428793 | 0.023554142                  | 0.016087559 | 0.024535766               | 0                      | 0.666258475          |
| TCGA-BR-4201-01 | 7.5558      | 0.011884374 | 0.044232592   | 0.036383779   | 0        | 0.044595513 | 0.007679122 | 0                            | 0.001332882 | 0.016821836               | 0.000623952            | 0.836445949          |
| TCGA-BR-4253-01 | 7.6574      | 0.027036709 | 0.127517645   | 0.065848585   | 0        | 0.076489858 | 0.010741859 | 0                            | 0.07131393  | 0.025740243               | 0                      | 0.595311171          |
| TCGA-BR-4255-01 | 8.070097037 | 0.0236566   | 0.033298196   | 0.052559585   | 0        | 0.029020804 |             |                              |             |                           |                        |                      |

|                 |             |             |             |             |             |             |             |   |
|-----------------|-------------|-------------|-------------|-------------|-------------|-------------|-------------|---|
|                 | 0.007234847 | 0           | 0.015676423 | 0.020211259 | 0.006149088 | 0.812193197 |             |   |
| TCGA-BR-4256-01 | 8.4424      | 0.014709135 | 0.103096877 | 0.056436341 | 0           | 0.066199037 |             |   |
|                 | 0.010726183 | 0.007608353 | 0.021594681 | 0.023675869 | 0           | 0.695953524 |             |   |
| TCGA-BR-4257-01 | 8.0991      | 0.010543426 | 0.057094058 | 0.033606516 | 0           | 0.038636465 |             |   |
|                 | 0.007873255 | 0.028353138 | 0.009299026 | 0.009990793 | 0           | 0.804603322 |             |   |
| TCGA-BR-4267-01 | 7.0204      | 0.016436239 | 0.159213444 | 0           | 0           | 0           | 0.005716945 | 0 |
|                 | 0.000681036 | 0.011634493 | 0           | 0.806317843 |             |             |             |   |
| TCGA-BR-4279-01 | 7.5881      | 0.012536425 | 0.040922508 | 0.070905027 | 0           | 0.042987207 |             |   |
|                 | 0.00671397  | 0.003426538 | 0.01837589  | 0.017668204 | 0           | 0.786464232 |             |   |
| TCGA-BR-4280-01 | 6.2821      | 0.01139481  | 0.024036058 | 0.028226686 | 0           | 0.020881739 |             |   |
|                 | 0.01325652  | 0           | 0.006249905 | 0.011160801 | 0.001987111 | 0.88280637  |             |   |
| TCGA-BR-4292-01 | 7.0902      | 0.007976282 | 0.040144939 | 0.015600345 | 0           | 0.01834565  |             |   |
|                 | 0.008644779 | 0.03593071  | 0.007145404 | 0.007779526 | 0           | 0.858432365 |             |   |
| TCGA-BR-4294-01 | 6.7197      | 0.004627457 | 0           | 0.028241046 | 0           | 0.00594582  | 0.010094976 |   |
|                 | 0.002357453 | 0.00168717  | 0.01289536  | 0           | 0.934150716 |             |             |   |
| TCGA-BR-4357-01 | 7.7076      | 0.015526436 | 0.077722126 | 0.05404422  | 0           | 0.034938519 |             |   |
|                 | 0.020471673 | 0           | 0.015173265 | 0.02729809  | 0           | 0.75482567  |             |   |
| TCGA-BR-4361-01 | 7.1597      | 0.006863529 | 0.082359835 | 0.047213774 | 0           | 0.001162257 |             |   |
|                 | 0.0134565   | 0.020432916 | 0.012797668 | 0.023855991 | 0           | 0.79185753  |             |   |
| TCGA-BR-4362-01 | 7.3126      | 0.013505789 | 0.073611023 | 0.008379633 | 0           | 0.048593783 |             |   |
|                 | 0.007471472 | 0.00739732  | 0.013471412 | 0.018973987 | 0.000120065 | 0.808475516 |             |   |
| TCGA-BR-4363-01 | 7.4633      | 0.052316605 | 0.063967007 | 0.039820066 | 0           | 0.047808049 |             |   |
|                 | 0.014893499 | 0           | 0.009705964 | 0.016078684 | 0           | 0.755410126 |             |   |
| TCGA-BR-4366-01 | 6.9764      | 0.011029237 | 0.022141252 | 0.039889405 | 0           | 0.063678038 |             |   |
|                 | 0.013616155 | 0           | 0.012227281 | 0.002243778 | 0           | 0.835174853 |             |   |
| TCGA-BR-4367-01 | 7.5741      | 0.015066707 | 0.053210614 | 0.067364953 | 0           | 0.034916555 |             |   |
|                 | 0.007593322 | 0.000953758 | 0.010554196 | 0.026058576 | 0           | 0.78428132  |             |   |
| TCGA-BR-4368-01 | 8.1318      | 0.013249129 | 0.035698889 | 0.026112861 | 0           | 0.007339386 |             |   |
|                 | 0.009617689 | 0.002968476 | 0.026203136 | 0.022704837 | 0.012954859 | 0.843150737 |             |   |

|                 |             |             |             |             |             |             |
|-----------------|-------------|-------------|-------------|-------------|-------------|-------------|
| TCGA-BR-4369-01 | 7.0244      | 0.012498964 | 0.020837003 | 0.031441398 | 0           | 0.031722596 |
|                 | 0.009309398 | 0.037934376 | 0.001957267 | 0.017190645 | 0.000810882 | 0.836297472 |
| TCGA-BR-4370-01 | 8.2308      | 0.013815078 | 0.07698952  | 0.031192304 | 0           | 0.059205894 |
|                 | 0.008692621 | 0.018429264 | 0.00708815  | 0.026782596 | 0           | 0.757804574 |
| TCGA-BR-4371-01 | 6.3113      | 0.006647617 | 0.012974288 | 0.014606371 | 0           | 0.036029492 |
|                 | 0.005850331 | 0.01342188  | 0.001144278 | 0.006229066 | 0           | 0.903096677 |
| TCGA-BR-6452-01 | 7.9713      | 0.016945958 | 0.06836356  | 0.033069086 | 0           | 0.026050047 |
|                 | 0.020870094 | 0           | 0.009741379 | 0.027774795 | 0           | 0.797185081 |
| TCGA-BR-6453-01 | 7.9529      | 0.183347333 | 0.008163899 | 0.050591366 | 0.001834356 |             |
|                 | 0.013882697 | 0.002910685 | 0.111995483 | 0.013605777 | 0.012871158 | 0.600797246 |
| TCGA-BR-6453-11 | 6.3368      | 0.020583947 | 0.006607887 | 0.037484835 | 0           | 0.05874527  |
|                 | 0.007915288 | 0.014281476 | 0.005532967 | 0.01037871  | 0           | 0.838469621 |
| TCGA-BR-6454-01 | 7.5501      | 0.035165251 | 0.052616733 | 0.017424683 | 0           | 0.025206459 |
|                 | 0.009457842 | 0           | 0.051949437 | 0.023919733 | 0           | 0.784259861 |
| TCGA-BR-6454-11 | 7.364       | 0.051577973 | 0.021505266 | 0.023029762 | 0           | 0.046425678 |
|                 | 0.005662793 | 0.028427125 | 0.012888512 | 0.022807128 | 0           | 0.787675762 |
| TCGA-BR-6455-01 | 7.7592      | 0.010165609 | 0.023776311 | 0.016951435 | 0           | 0.112459906 |
|                 | 0.00824825  | 0           | 0.028016254 | 0.010586276 | 0           | 0.78979596  |
| TCGA-BR-6456-01 | 8.1958      | 0.010743929 | 0.0895654   | 0.021117958 | 0           | 0.108352667 |
|                 | 0.010785824 | 0.039274745 | 0.010101959 | 0.028108531 | 0           | 0.681948987 |
| TCGA-BR-6457-01 | 8.2397      | 0.032009523 | 0.025184967 | 0.037365782 | 0.000798381 |             |
|                 | 0.036818492 | 0.009727079 | 0.019028857 | 0.013101175 | 0.016064764 | 0.80990098  |
| TCGA-BR-6457-11 | 6.9303      | 0.018956356 | 0           | 0.082221462 | 0           | 0.133284424 |
|                 | 0.018158631 | 0.021406686 | 0.024241072 | 0           | 0.691251474 | 0.010479896 |
| TCGA-BR-6458-01 | 8.385       | 0.017253208 | 0.06626466  | 0.055101103 | 0           | 0.003367101 |
|                 | 0.011069578 | 0           | 0.027230314 | 0.04609257  | 0           | 0.773621466 |
| TCGA-BR-6458-11 | 6.1912      | 0.021768704 | 0.00815566  | 0.020527891 | 0           | 0.048591679 |
|                 | 0.003834329 | 0           | 0.010061224 | 0.019102304 | 0           | 0.867958208 |
| TCGA-BR-6563-01 | 7.5155      | 0.042508818 | 0.015937912 | 0.048669054 | 0           | 0.012919816 |
|                 | 0.004642092 | 0.033633393 | 0.034519032 | 0.011077136 | 0           | 0.796092748 |

|                 |             |             |             |             |             |                        |
|-----------------|-------------|-------------|-------------|-------------|-------------|------------------------|
| TCGA-BR-6564-01 | 8.2906      | 0.0140104   | 0.019505184 | 0.033643146 | 0.010203981 |                        |
|                 | 0.012983623 | 0.008524375 | 0.036044373 | 0.009532089 | 0.016710062 | 0.001768245            |
|                 | 0.837074522 |             |             |             |             |                        |
| TCGA-BR-6564-11 | 7.377       | 0.020901482 | 0           | 0.116567342 | 0           | 0.13023962 0.016230969 |
|                 | 0.022155592 | 0.011929459 | 0.016720593 | 0           | 0.665254943 |                        |
| TCGA-BR-6565-01 | 7.7729      | 0.016024171 | 0.043070634 | 0.029809032 | 0           | 0.054393536            |
|                 | 0.014757159 | 0           | 0.017061538 | 0.022421053 | 0           | 0.802462877            |
| TCGA-BR-6566-01 | 7.4277      | 0.005514632 | 0.052630816 | 0.01851691  | 0           | 0.025541483            |
|                 | 0.01218372  | 0.001406403 | 0.00314285  | 0.008080984 | 0           | 0.872982203            |
| TCGA-BR-6705-01 | 8.6721      | 0.01824936  | 0.022126567 | 0.036490742 | 0           | 0.062707024            |
|                 | 0.013174944 | 0.010780867 | 0.003689466 | 0.019319055 | 0.001078776 | 0.8123832              |
| TCGA-BR-6706-01 | 8.0156      | 0.027210862 | 0.115324323 | 0.043944584 | 0           | 0.039725559            |
|                 | 0.006018039 | 0           | 0.115440125 | 0.038704132 | 0           | 0.613632375            |
| TCGA-BR-6707-01 | 6.9954      | 0.012028372 | 0.025425009 | 0.013431462 | 0           | 0.024903673            |
|                 | 0.005186399 | 0           | 0.03641518  | 0.005897927 | 0           | 0.876711978            |
| TCGA-BR-6709-01 | 8.6564      | 0.023004615 | 0.056547747 | 0.038608791 | 0           | 0.154518491            |
|                 | 0.010773428 | 0           | 0.057867872 | 0.025081981 | 0           | 0.633597074            |
| TCGA-BR-6710-01 | 5.6625      | 0.008025259 | 0.00446739  | 0.009880245 | 0           | 0.020590406            |
|                 | 0.004184438 | 0           | 0.002824926 | 0.00598888  | 0           | 0.944038456            |
| TCGA-BR-6801-01 | 7.6339      | 0.001709478 | 0.012410127 | 0.010665226 | 0           | 0.052152278            |
|                 | 0.007506451 | 0.001995306 | 0           | 0.00197451  | 0           | 0.911586624            |
| TCGA-BR-6802-01 | 7.9538      | 0.016444076 | 0.053784928 | 0.010307072 | 0           | 0.08225225             |
|                 | 0.005710306 | 0.00899414  | 0.024553663 | 0.014875394 | 0           | 0.783078171            |
| TCGA-BR-6802-11 | 4.9727      | 0.006155999 | 0.007142437 | 0.010326699 | 0           | 0.028748313            |
|                 | 0.002349531 | 0.0000811   | 0.016053252 | 0.002148711 | 0           | 0.926993942            |
| TCGA-BR-6803-01 | 8.1661      | 0.024917925 | 0.017844944 | 0.028060467 | 0           | 0.024700433            |
|                 | 0.007224357 | 0.054325297 | 0.016563661 | 0.011547913 | 0.006944513 | 0.80787049             |
| TCGA-BR-6852-01 | 7.9626      | 0.015224321 | 0.134747557 | 0.029745676 | 0           | 0.031865918            |
|                 | 0.009210173 | 0           | 0.114029829 | 0.025734251 | 0           | 0.639442275            |
| TCGA-BR-6852-11 | 6.4023      | 0.052209073 | 0.036534406 | 0.025607767 | 0           | 0.050844467            |

|                 |             |             |             |             |             |             |             |
|-----------------|-------------|-------------|-------------|-------------|-------------|-------------|-------------|
|                 | 0.006625236 | 0           | 0.021514112 | 0.044288786 | 0           | 0.762376155 |             |
| TCGA-BR-7196-01 | 8.1006      | 0.033322287 | 0.076437198 | 0.05210312  | 0           | 0.029077159 |             |
|                 | 0.014905485 | 0           | 0.032419671 | 0.033030967 | 0           | 0.728704113 |             |
| TCGA-BR-7197-01 | 6.7009      | 0.002589582 | 0.009315466 | 0.012424661 | 0           | 0.05871911  |             |
|                 | 0.003807254 | 0.022493215 | 0           | 0.017999194 | 0           | 0.872651517 |             |
| TCGA-BR-7703-01 | 6.9322      | 0.007009582 | 0.021095519 | 0.024577924 | 0           | 0.03164601  |             |
|                 | 0.012717317 | 0.034961207 | 0.000891392 | 0.005759063 | 0           | 0.861341986 |             |
| TCGA-BR-7703-11 | 6.4553      | 0.028055636 | 0.012211245 | 0.022462189 | 0           | 0.052222264 |             |
|                 | 0.005177094 | 0           | 0.01068361  | 0.026278359 | 0           | 0.842909603 |             |
| TCGA-BR-7704-01 | 7.7899      | 0.01847711  | 0.026199615 | 0.028462109 | 0           | 0.039908155 |             |
|                 | 0.010167953 | 0           | 0.022871996 | 0.029052866 | 0           | 0.824860196 |             |
| TCGA-BR-7704-11 | 8.2539      | 0.022008207 | 0.017844986 | 0.042855645 | 0           | 0.06069088  |             |
|                 | 0.016841295 | 0.016535802 | 0.013725712 | 0.015113714 | 0.001984272 | 0.792399488 |             |
| TCGA-BR-7707-01 | 7.5906      | 0.000466811 | 0.088261413 | 0           | 0           | 0.024865467 | 0.008870945 |
|                 | 0.026186101 | 0.00508482  | 0.009550465 | 0           | 0.836713977 |             |             |
| TCGA-BR-7715-01 | 7.3862      | 0.006160989 | 0.012297969 | 0.017754827 | 0           | 0.046535125 |             |
|                 | 0.012112823 | 0.008538442 | 0.001212964 | 0.013978175 | 0.004088486 | 0.877320202 |             |
| TCGA-BR-7715-11 | 7.0116      | 0.122158205 | 0.026517277 | 0.030390393 | 0           | 0.019283387 |             |
|                 | 0.003047973 | 0.045242145 | 0.025379787 | 0.026150067 | 0           | 0.701830766 |             |
| TCGA-BR-7716-01 | 7.9217      | 0.013401932 | 0.034915344 | 0.052575711 | 0           | 0.0793316   |             |
|                 | 0.011660547 | 0           | 0.064037813 | 0.029559778 | 0           | 0.714517275 |             |
| TCGA-BR-7716-11 | 7.3102      | 0.025187269 | 0.025985726 | 0.02599005  | 0           | 0.063370659 |             |
|                 | 0.007250991 | 0.027563238 | 0.023607319 | 0.020806166 | 0           | 0.780238582 |             |
| TCGA-BR-7717-01 | 6.9768      | 0.014634773 | 0.009453741 | 0.020538874 | 0           | 0.023917542 |             |
|                 | 0.004600485 | 0.006696488 | 0.00345054  | 0.001652332 | 0           | 0.915055224 |             |
| TCGA-BR-7717-11 | 7.1427      | 0.128935056 | 0.022332614 | 0.02496441  | 0.000457883 |             |             |
|                 | 0.021877552 | 0.003718554 | 0.029815385 | 0.022238031 | 0.022640643 | 0.000240121 |             |
|                 | 0.72277975  |             |             |             |             |             |             |
| TCGA-BR-7722-01 | 7.8309      | 0.020067461 | 0.023614734 | 0.015938485 | 0           | 0.030808507 |             |
|                 | 0.009072278 | 0           | 0.001259847 | 0.006345971 | 0           | 0.892892717 |             |

|                 |        |             |             |             |             |             |             |             |             |             |             |             |
|-----------------|--------|-------------|-------------|-------------|-------------|-------------|-------------|-------------|-------------|-------------|-------------|-------------|
| TCGA-BR-7723-01 | 8.576  | 0.029130305 | 0.02173024  | 0.021062874 | 0.031256094 | 0.012907369 | 0.020856602 | 0           | 0.035798738 | 0.030857779 | 0           | 0.796399997 |
| TCGA-BR-7851-01 | 7.7641 | 0.021021778 | 0.040593601 | 0.024477744 | 0           | 0.026690079 | 0.023371742 | 0           | 0.0061137   | 0.02179704  | 0.007370291 | 0.828564026 |
| TCGA-BR-7851-11 | 6.2447 | 0.009137019 | 0           | 0.044337718 | 0           | 0.134757712 | 0.01291626  | 0           | 0.001666249 | 0.003814514 | 0           | 0.793370528 |
| TCGA-BR-7901-01 | 7.9296 | 0.017451485 | 0.051525979 | 0.035688922 | 0           | 0.046251141 | 0.015960564 | 0           | 0.009853759 | 0.02235432  | 0           | 0.800913828 |
| TCGA-BR-7957-01 | 7.877  | 0.014630062 | 0.021074149 | 0.061429988 | 0           | 0.02547058  | 0.014664608 | 0.00881182  | 0.005072308 | 0.023013676 | 0.007536812 | 0.818295998 |
| TCGA-BR-7958-01 | 7.8345 | 0.015235139 | 0.079681997 | 0.035894566 | 0           | 0.025079182 | 0.00536186  | 0           | 0.093233497 | 0.033886185 | 0           | 0.711627575 |
| TCGA-BR-7959-01 | 7.7741 | 0.013301046 | 0.035961349 | 0.036248657 | 0           | 0.02620834  | 0.012939874 | 0.003438435 | 0.004924554 | 0.029829039 | 0           | 0.837148706 |
| TCGA-BR-8058-01 | 7.6131 | 0.043583452 | 0.036983471 | 0.042137925 | 0           | 0.062694498 | 0.01074557  | 0.001269274 | 0.033760963 | 0.05209431  | 0           | 0.716730538 |
| TCGA-BR-8059-01 | 7.2648 | 0.00670176  | 0.034792059 | 0.013702299 | 0           | 0.020485751 | 0.004730843 | 0           | 0.00122428  | 0.011302622 | 0           | 0.907060387 |
| TCGA-BR-8060-01 | 7.8636 | 0.018532177 | 0.040372763 | 0.027521467 | 0           | 0.058459277 | 0.028111695 | 0.005643742 | 0.004610154 | 0.034786192 | 0.014512605 | 0.767449929 |
| TCGA-BR-8060-11 | 6.094  | 0.011936604 | 0.003425975 | 0.010300407 | 0           | 0.020782027 | 0.004748175 | 0           | 0.006335315 | 0.007615917 | 0.000903451 | 0.933952129 |
| TCGA-BR-8077-01 | 6.7244 | 0.00708677  | 0.011362788 | 0.020898415 | 0           | 0.031503112 | 0.002368951 | 0           | 0.033834211 | 0.008423518 | 0           | 0.884522235 |
| TCGA-BR-8078-01 | 7.5859 | 0.010615285 | 0.060227917 | 0.02848525  | 0           | 0.031857729 | 0.010864487 | 0           | 0.032627328 | 0.017581154 | 0.002554104 | 0.805186747 |
| TCGA-BR-8080-01 | 7.7248 | 0.036107749 | 0.033994436 | 0.037498411 | 0           | 0.033446693 | 0.010224728 | 0.037256068 | 0.013336569 | 0.023224076 | 0.001135321 | 0.773775947 |
| TCGA-BR-8081-01 | 7.4984 | 0.031681599 | 0.061066757 | 0.039494379 | 0           | 0.0272179   | 0.012222086 | 0.011965604 | 0.017208826 | 0.034101113 | 0           | 0.765041736 |

|                 |             |             |             |             |             |             |
|-----------------|-------------|-------------|-------------|-------------|-------------|-------------|
| TCGA-BR-8284-01 | 7.6674      | 0.026804445 | 0.037622677 | 0.04615841  | 0           | 0.010491099 |
|                 | 0.013890722 | 0           | 0.067076747 | 0.030280095 | 0           | 0.767675804 |
| TCGA-BR-8286-01 | 7.6631      | 0.015248543 | 0.0346398   | 0.028946531 | 0           | 0.013055403 |
|                 | 0.014216423 | 0           | 0.008556589 | 0.015693252 | 0.006716608 | 0.862926851 |
| TCGA-BR-8289-01 | 7.1346      | 0.01178636  | 0.013332221 | 0.016268638 | 0.016638549 |             |
|                 | 0.020271305 | 0.015497608 | 0           | 0.003898455 | 0.006539632 | 0.895767231 |
| TCGA-BR-8291-01 | 7.791       | 0.023430223 | 0.029328447 | 0.074296383 | 0.006110384 |             |
|                 | 0.030792732 | 0.014713157 | 0           | 0.020735546 | 0.035367737 | 0.765225391 |
| TCGA-BR-8295-01 | 6.7469      | 0.018378491 | 0           | 0.002646389 | 0.06332713  | 0.0136652   |
|                 | 0.015403414 | 0.002366459 | 0.000834868 | 0           | 0.883378048 |             |
| TCGA-BR-8296-01 | 7.4912      | 0.069962969 | 0.029863728 | 0.018558326 | 0           | 0.026702035 |
|                 | 0.008573221 | 0.052803268 | 0.009249017 | 0.024168924 | 0           | 0.760118513 |
| TCGA-BR-8297-01 | 7.7582      | 0.020648805 | 0.009191369 | 0.023318367 | 0           | 0.023962772 |
|                 | 0.006840778 | 0.031179192 | 0.003261095 | 0.010284502 | 0.004413124 | 0.866899996 |
| TCGA-BR-8361-01 | 7.1583      | 0.00942947  | 0.031497879 | 0.017665948 | 0           | 0.021110102 |
|                 | 0.009273471 | 0           | 0.029557004 | 0.013635042 | 0.005452111 | 0.862378972 |
| TCGA-BR-8362-01 | 7.7236      | 0.012197453 | 0.028239253 | 0.061809098 | 0           | 0.056926411 |
|                 | 0.012177857 | 0.000258704 | 0.017403962 | 0.022571086 | 0           | 0.788416177 |
| TCGA-BR-8363-01 | 7.5927      | 0.016876856 | 0.082725251 | 0.02575727  | 0           | 0.035646391 |
|                 | 0.010659024 | 0           | 0.068924638 | 0.042316156 | 0           | 0.717094414 |
| TCGA-BR-8364-01 | 7.9159      | 0.037364687 | 0.023017709 | 0.070548495 | 0           | 0.014974561 |
|                 | 0.016982329 | 0.027814818 | 0.01425712  | 0.021320387 | 0.008095046 | 0.765624847 |
| TCGA-BR-8365-01 | 8.0808      | 0.029660607 | 0.019746927 | 0.049377785 | 0.000685528 |             |
|                 | 0.021855971 | 0.015416009 | 0.029061637 | 0.013581924 | 0.022763804 | 0.007062692 |
|                 | 0.790787116 |             |             |             |             |             |
| TCGA-BR-8366-01 | 7.7597      | 0.040377378 | 0.081431347 | 0.045610652 | 0           | 0.04340308  |
|                 | 0.005925541 | 0.010432074 | 0.051407045 | 0.032304554 | 0           | 0.689108327 |
| TCGA-BR-8367-01 | 7.6922      | 0.016248211 | 0.015402548 | 0.049468777 | 0           | 0.044326077 |
|                 | 0.018695839 | 0           | 0.002675484 | 0.018647678 | 0           | 0.834535386 |
| TCGA-BR-8368-01 | 7.4943      | 0.011148743 | 0.051945387 | 0.008976885 | 0           | 0.032397734 |

|                 |             |             |             |             |             |             |
|-----------------|-------------|-------------|-------------|-------------|-------------|-------------|
|                 | 0.022084615 | 0.015448003 | 0.003591521 | 0.005941643 | 0           | 0.848465467 |
| TCGA-BR-8369-01 | 7.1477      | 0.020553078 | 0.009848244 | 0.025795893 | 0           | 0.022198472 |
|                 | 0.009693676 | 0.010562147 | 0           | 0.006347591 | 0           | 0.895000899 |
| TCGA-BR-8371-01 | 8.14        | 0.063360561 | 0.001498907 | 0.02475162  | 0.019517662 | 0.005911593 |
|                 | 0.00698046  | 0.044812324 | 0.001452382 | 0.005018018 | 0           | 0.826696473 |
| TCGA-BR-8372-01 | 7.2812      | 0.010635868 | 0.048767719 | 0.038587344 | 0           | 0.029489149 |
|                 | 0.00902528  | 0.020821977 | 0.020938968 | 0.012219165 | 0           | 0.809514529 |
| TCGA-BR-8373-01 | 8.2619      | 0.013016285 | 0.022022903 | 0.046562237 | 0           | 0.067070785 |
|                 | 0.012013512 | 0.021153118 | 0.001306498 | 0.018469037 | 0.000704557 | 0.797681068 |
| TCGA-BR-8380-01 | 7.7647      | 0.017425066 | 0.018535817 | 0.039074384 | 0.001007736 |             |
|                 | 0.036525633 | 0.016577993 | 0.024175328 | 0.000516295 | 0.011325536 | 0.002099175 |
|                 | 0.832737037 |             |             |             |             |             |
| TCGA-BR-8381-01 | 7.1138      | 0.060133815 | 0.047989802 | 0.031823565 | 0           | 0.021736157 |
|                 | 0.005397651 | 0           | 0.042758936 | 0.030313473 | 0           | 0.759846601 |
| TCGA-BR-8382-01 | 6.8886      | 0.009418106 | 0.052662555 | 0.007783498 | 0           | 0.030718002 |
|                 | 0.012217262 | 0.00980082  | 0.000191355 | 0.008978328 | 0           | 0.868230073 |
| TCGA-BR-8384-01 | 7.9566      | 0.018852158 | 0.016218797 | 0.049214615 | 0.016046746 |             |
|                 | 0.012406394 | 0.014674196 | 0.033320439 | 0.02321883  | 0.025670822 | 0.008907354 |
|                 | 0.781469651 |             |             |             |             |             |
| TCGA-BR-8483-01 | 6.1918      | 0.007416876 | 0.012132012 | 0.006727826 | 0           | 0.011768018 |
|                 | 0.00836861  | 0           | 0           | 0.004200139 | 0.001015555 | 0.948370964 |
| TCGA-BR-8484-01 | 7.454       | 0.041665495 | 0.053238218 | 0.0374009   | 0           | 0.026087991 |
|                 | 0.018208105 | 0           | 0.019265572 | 0.047535108 | 0           | 0.756598611 |
| TCGA-BR-8485-01 | 7.1907      | 0.01525633  | 0.027283897 | 0.017514093 | 0           | 0.065084495 |
|                 | 0.009645509 | 0.038054197 | 0.021822994 | 0.021844769 | 0.004879544 | 0.778614172 |
| TCGA-BR-8486-01 | 7.0543      | 0.011761515 | 0.028553833 | 0.030171224 | 0           | 0.042372088 |
|                 | 0.014394516 | 0           | 0           | 0.020617638 | 0           | 0.852129187 |
| TCGA-BR-8487-01 | 6.8241      | 0.013749214 | 0.050530934 | 0.005314008 | 0           | 0.006829615 |
|                 | 0.012692703 | 0           | 0.000239996 | 0.00794965  | 0           | 0.902693882 |
| TCGA-BR-8588-01 | 6.9451      | 0.017960472 | 0.02218504  | 0.022415478 | 0           | 0.02635782  |
|                 | 0.005630076 | 0.012634988 | 0.013392743 | 0.011701979 | 0           | 0.867721406 |

|                 |             |             |             |             |             |             |
|-----------------|-------------|-------------|-------------|-------------|-------------|-------------|
| TCGA-BR-8589-01 | 7.0584      | 0.008104873 | 0.058996133 | 0.033676917 | 0           | 0.029002393 |
|                 | 0.006715378 | 0           | 0.082854995 | 0.009199052 | 0           | 0.77145026  |
| TCGA-BR-8590-01 | 7.3979      | 0.029211623 | 0.028709338 | 0.055129612 | 0           | 0.020968892 |
|                 | 0.014991582 | 0.007255683 | 0.014545865 | 0.030373939 | 0.012007651 | 0.786805815 |
| TCGA-BR-8591-01 | 7.4323      | 0.021566526 | 0.103911343 | 0.013427232 | 0           | 0.018985198 |
|                 | 0.013967727 | 0.01863394  | 0           | 0.026154113 | 0           | 0.783353921 |
| TCGA-BR-8592-01 | 7.8197      | 0.035767752 | 0.011537458 | 0.041475931 | 0           | 0.028462474 |
|                 | 0.014026454 | 0.026935632 | 0.004947607 | 0.012863725 | 0.006207009 | 0.817775958 |
| TCGA-BR-8676-01 | 6.6696      | 0.009700007 | 0.010616415 | 0.012934893 | 0           | 0.005163977 |
|                 | 0.002789581 | 0           | 0.017141191 | 0.001128664 | 0.004195877 | 0.936329394 |
| TCGA-BR-8677-01 | 7.9474      | 0.013435742 | 0.056836556 | 0.02316737  | 0           | 0.039482901 |
|                 | 0.007807901 | 0           | 0.047078891 | 0.023350147 | 0           | 0.788840492 |
| TCGA-BR-8678-01 | 7.9843      | 0.006186314 | 0.013188714 | 0.002291167 | 0           | 0.108481664 |
|                 | 0.009524522 | 0           | 0.016037872 | 0.01506251  | 0           | 0.829227236 |
| TCGA-BR-8679-01 | 6.7279      | 0.013655984 | 0.01386637  | 0.023969397 | 0           | 0.038237139 |
|                 | 0.019253955 | 0           | 0           | 0.005719284 | 0.007626138 | 0.877671734 |
| TCGA-BR-8680-01 | 6.7785      | 0.005533564 | 0.016844693 | 0.037340368 | 0           | 0.016948421 |
|                 | 0.012595929 | 0.024407028 | 0           | 0.003403793 | 0           | 0.882926203 |
| TCGA-BR-8682-01 | 7.1285      | 0.015542476 | 0.008794147 | 0.049616858 | 0           | 0.071738582 |
|                 | 0.014680452 | 0.002857066 | 0.001513306 | 0.007894207 | 0           | 0.827362906 |
| TCGA-BR-8683-01 | 7.7841      | 0.021655903 | 0.03696995  | 0.033958175 | 0           | 0.063358507 |
|                 | 0.010147631 | 0.015767788 | 0.015530202 | 0.024466911 | 0           | 0.778144933 |
| TCGA-BR-8686-01 | 7.4         | 0.04729458  | 0.027378781 | 0.049234772 | 0           | 0.031218478 |
|                 | 0.013248178 | 0           | 0.038900662 | 0.032780792 | 0           | 0.759943757 |
| TCGA-BR-8687-01 | 6.7538      | 0.005081212 | 0.00867024  | 0.019195882 | 0           | 0.02106372  |
|                 | 0.005764765 | 0.016772907 | 0           | 0.009070397 | 0.00384651  | 0.910534367 |
| TCGA-BR-8690-01 | 7.1142      | 0.013954905 | 0.024949745 | 0.014930385 | 0           | 0.005158522 |
|                 | 0.006076912 | 0           | 0.018798908 | 0.010439508 | 0           | 0.905691115 |
| TCGA-BR-A44T-01 | 7.581       | 0.216520294 | 0.003036906 | 0.033429433 | 0.012203523 | 0           |
|                 | 0.002718779 | 0.050707545 | 0.012470759 | 0.003569163 | 0           | 0.665343599 |

|                 |             |             |             |             |             |             |
|-----------------|-------------|-------------|-------------|-------------|-------------|-------------|
| TCGA-BR-A44U-01 | 5.8192      | 0.006240836 | 0.012365765 | 0.004937174 | 0           | 0.015828276 |
|                 | 0.002851886 | 0.003512935 | 0           | 0.002772937 | 0           | 0.951490191 |
| TCGA-BR-A452-01 | 8.2077      | 0.009539819 | 0.011324562 | 0.012137448 | 0           | 0.040953179 |
|                 | 0           | 0.10192302  | 0.003752634 | 0           | 0.820369339 |             |
| TCGA-BR-A453-01 | 8.0352      | 0.00866884  | 0.007159214 | 0.030735396 | 0.016038358 |             |
|                 | 0.011786635 | 0.006018616 | 0.0604972   | 0.004823389 | 0.006795839 | 0.005404366 |
|                 | 0.842072147 |             |             |             |             |             |
| TCGA-BR-A4CR-01 | 6.8625      | 0.013821367 | 0.005232512 | 0.015244131 | 0           | 0.028644536 |
|                 | 0.008984858 | 0.008954193 | 0           | 0.01012081  | 0.017053943 | 0.89194365  |
| TCGA-BR-A4CS-01 | 6.6413      | 0.00590943  | 0.020813097 | 0.006227654 | 0           | 0.015450088 |
|                 | 0.006205563 | 0           | 0           | 0.004662049 | 0           | 0.940732118 |
| TCGA-BR-A4IU-01 | 7.6153      | 0.055098583 | 0.007303199 | 0.042952191 | 0.00687457  |             |
|                 | 0.01675511  | 0.007446181 | 0.050610683 | 0.013630798 | 0.008403358 | 0.003806539 |
|                 | 0.787118788 |             |             |             |             |             |
| TCGA-BR-A4IV-01 | 7.8417      | 0.018506801 | 0.020590553 | 0.037093327 | 0           | 0.018091323 |
|                 | 0.007160364 | 0.024863493 | 0           | 0.014287756 | 0.009244001 | 0.850162381 |
| TCGA-BR-A4IY-01 | 7.7201      | 0.009174413 | 0.12650063  | 0.030273246 | 0           | 0.033958551 |
|                 | 0.015820339 | 0           | 0.020722709 | 0.043261646 | 0           | 0.720288465 |
| TCGA-BR-A4IZ-01 | 8.3642      | 0.018354742 | 0.045355061 | 0.069429187 | 0           | 0.013815565 |
|                 | 0.011261607 | 0.054783998 | 0.007843443 | 0.014582772 | 0           | 0.764573625 |
| TCGA-BR-A4J1-01 | 6.4504      | 0.008961231 | 0.007514182 | 0.007079655 | 0.007934658 |             |
|                 | 0.015590637 | 0.007485686 | 0           | 0.005005597 | 0.002854509 | 0.937573844 |
| TCGA-BR-A4J2-01 | 7.9002      | 0.109278665 | 0.032014068 | 0.039945671 | 0           | 0.024423722 |
|                 | 0.010966359 | 0           | 0.015095513 | 0.020258259 | 0.000180172 | 0.747837571 |
| TCGA-BR-A4J4-01 | 6.4345      | 0.011649446 | 0.027358152 | 0.014055118 | 0           | 0.074935314 |
|                 | 0.006480856 | 0           | 0.005108214 | 0.007602492 | 0           | 0.852810407 |
| TCGA-BR-A4J5-01 | 7.6878      | 0.017576383 | 0.022122533 | 0.031597815 | 0           | 0.01755358  |
|                 | 0.008055287 | 0.018294719 | 0.00309664  | 0.010934198 | 0.004380229 | 0.866388616 |
| TCGA-BR-A4J6-01 | 7.0684      | 0.009553533 | 0.02231632  | 0.007689902 | 0           | 0.011234768 |
|                 | 0.001977556 | 0.041384908 | 0.001311201 | 0.00880069  | 0           | 0.895731121 |
| TCGA-BR-A4J7-01 | 7.6331      | 0.016569511 | 0.021223946 | 0.030463666 | 0.008326861 |             |

|                 |             |             |             |             |             |             |             |
|-----------------|-------------|-------------|-------------|-------------|-------------|-------------|-------------|
|                 | 0.002936421 | 0.01087209  | 0           | 0.055616087 | 0.007186583 | 0.007824145 | 0.838980689 |
| TCGA-BR-A4J8-01 | 6.5871      | 0.010893214 | 0.013118153 | 0.011323671 | 0           | 0.015644698 |             |
|                 | 0.007654713 | 0           | 0.000624484 | 0.004057176 | 0.00128391  | 0.935399983 |             |
| TCGA-BR-A4J9-01 | 7.5717      | 0.022879205 | 0.004351392 | 0.022612086 | 0.009101859 |             |             |
|                 | 0.009121885 | 0.005417314 | 0.05065133  | 0.0000371   | 0.009353457 | 0.00210053  |             |
|                 | 0.864373872 |             |             |             |             |             |             |
| TCGA-BR-A4PD-01 | 7.4652      | 0.103848319 | 0.024347681 | 0.02879699  | 0           | 0.014568405 |             |
|                 | 0.003224026 | 0           | 0           | 0.011870212 | 0.813344368 |             |             |
| TCGA-BR-A4PE-01 | 7.3497      | 0.010520148 | 0.052107614 | 0.014344255 | 0           | 0.021235073 |             |
|                 | 0.007056227 | 0           | 0.002537044 | 0.022227714 | 0           | 0.869971926 |             |
| TCGA-BR-A4PF-01 | 6.85        | 0.011644061 | 0.041135057 | 0.027399109 | 0           | 0.05454098  |             |
|                 | 0.009937075 | 0           | 0.014891706 | 0.013226846 | 0           | 0.827225167 |             |
| TCGA-BR-A4QI-01 | 6.8213      | 0.00381215  | 0.039164067 | 0.012297359 | 0           | 0.032276315 |             |
|                 | 0.007796277 | 0.00389525  | 0.010144953 | 0.006618073 | 0           | 0.883995556 |             |
| TCGA-BR-A4QL-01 | 5.5747      | 0.003537209 | 0.010961622 | 0.009932574 | 0           | 0.008941159 |             |
|                 | 0.004982088 | 0.021509679 | 0.001455805 | 0.002904519 | 0           | 0.935775345 |             |
| TCGA-BR-A4QM-01 | 5.5668      | 0.018892553 | 0.007179784 | 0.012433365 | 0           | 0.00425316  |             |
|                 | 0.002768361 | 0           | 0.005651141 | 0.003429464 | 0           | 0.945392172 |             |
| TCGA-CD-5798-01 | 8.1851      | 0.006612826 | 0.036870625 | 0.034443242 | 0           | 0.011040159 |             |
|                 | 0.005815621 | 0.028164975 | 0.005777925 | 0.006079578 | 0.00120219  | 0.863992859 |             |
| TCGA-CD-5799-01 | 7.3273      | 0.004896005 | 0.030659681 | 0.005581882 | 0           | 0.028853565 |             |
|                 | 0.007941828 | 0.011427924 | 0           | 0.002935523 | 0           | 0.907703592 |             |
| TCGA-CD-5800-01 | 7.4608      | 0.010764325 | 0.026423137 | 0.032562702 | 0           | 0.030965824 |             |
|                 | 0.032928309 | 0.025692951 | 0.011868089 | 0.004246123 | 0           | 0.824548539 |             |
| TCGA-CD-5801-01 | 6.8986      | 0.008887743 | 0.034852772 | 0.020117645 | 0           | 0.025832796 |             |
|                 | 0.0000192   | 0           | 0.073609666 | 0.009826153 | 0           | 0.826854072 |             |
| TCGA-CD-5803-01 | 8.6502      | 0.050990091 | 0.0508647   | 0.041993711 | 0.003113523 |             |             |
|                 | 0.015221257 | 0.008043888 | 0.106558692 | 0.074620023 | 0.021465416 | 0.010042045 |             |
|                 | 0.617086654 |             |             |             |             |             |             |
| TCGA-CD-5804-01 | 7.9961      | 0.008771617 | 0.047874339 | 0.017182693 | 0           | 0.022068817 |             |
|                 | 0.006711251 | 0.009829102 | 0.005069938 | 0.006722896 | 0           | 0.875769347 |             |

|                 |             |             |             |             |             |             |
|-----------------|-------------|-------------|-------------|-------------|-------------|-------------|
| TCGA-CD-5813-01 | 8.2148      | 0.039807289 | 0.024838045 | 0.078060084 | 0           | 0.021025224 |
|                 | 0.006511818 | 0.072039823 | 0.029626692 | 0.02172325  | 0.000290908 | 0.706076866 |
| TCGA-CD-8524-01 | 7.8186      | 0.010609647 | 0.031403818 | 0.018893936 | 0           | 0.016062561 |
|                 | 0.007636375 | 0           | 0.013635175 | 0.01696124  | 0           | 0.884797248 |
| TCGA-CD-8525-01 | 7.34        | 0.021559264 | 0.037677911 | 0.013537355 | 0           | 0.010582482 |
|                 | 0.006098105 | 0           | 0.017360905 | 0.013906773 | 0.0000298   | 0.879247449 |
| TCGA-CD-8526-01 | 7.6777      | 0.024642985 | 0.039177248 | 0.013280668 | 0           | 0.062859595 |
|                 | 0.014372936 | 0           | 0.008549366 | 0.020587193 | 0           | 0.81653001  |
| TCGA-CD-8527-01 | 6.8098      | 0.00995802  | 0.014295589 | 0.020033085 | 0           | 0.014258203 |
|                 | 0.007427009 | 0           | 0.009486537 | 0.00274218  | 0           | 0.921799377 |
| TCGA-CD-8528-01 | 6.876       | 0.002642439 | 0.029560125 | 0.035310243 | 0           | 0.02890273  |
|                 | 0.0354927   | 0.009149699 | 0           | 0.00050472  | 0           | 0.858437343 |
| TCGA-CD-8529-01 | 8.3875      | 0.062626146 | 0.053804097 | 0.074004106 | 0           | 0.029052886 |
|                 | 0.011502366 | 0.021705925 | 0.01648785  | 0.043792061 | 0           | 0.687024563 |
| TCGA-CD-8530-01 | 7.5751      | 0.017242704 | 0.024264601 | 0.034105885 | 0           | 0.022067341 |
|                 | 0.009204448 | 0.021091285 | 0.004255503 | 0.009682926 | 0.001259768 | 0.85682554  |
| TCGA-CD-8531-01 | 8.1101      | 0.41468932  | 0.029123786 | 0           | 0           | 0.076295737 |
|                 | 0           | 0           | 0           | 0.029478432 | 0.43352657  | 0.016886156 |
| TCGA-CD-8532-01 | 7.3953      | 0.069325524 | 0.031582813 | 0.036874465 | 0           | 0.087047966 |
|                 | 0.008003109 | 0           | 0.019574458 | 0.033990699 | 0           | 0.713600966 |
| TCGA-CD-8533-01 | 6.758       | 0.010788639 | 0.008723308 | 0.028663119 | 0           | 0.038376261 |
|                 | 0.012483202 | 0           | 0           | 0.017237529 | 0.006920311 | 0.876807631 |
| TCGA-CD-8534-01 | 6.7184      | 0.013880168 | 0.008050342 | 0.020527532 | 0           | 0.019619521 |
|                 | 0.004601347 | 0.025493051 | 0.002277041 | 0.005255723 | 0.004665637 | 0.895629638 |
| TCGA-CD-8535-01 | 8.3542      | 0.005429225 | 0.011976688 | 0.015181633 | 0           | 0           |
|                 | 0           | 0.001253054 | 0.021174333 | 0.059792418 | 0.871802793 | 0.013389856 |
| TCGA-CD-8536-01 | 7.0194      | 0.0045848   | 0.05459316  | 0.012780527 | 0           | 0.031335793 |
|                 | 0.01314285  | 0.0055015   | 0.019494498 | 0.008843171 | 0           | 0.849723702 |
| TCGA-CD-A486-01 | 6.9948      | 0.008822559 | 0.038706731 | 0.013110038 | 0           | 0.025940653 |
|                 | 0.008638977 | 0.020376215 | 0.001518753 | 0.006113414 | 0           | 0.876772659 |

|                 |             |             |             |             |             |             |
|-----------------|-------------|-------------|-------------|-------------|-------------|-------------|
| TCGA-CD-A489-01 | 8.0822      | 0.029430991 | 0.020765973 | 0.02439864  | 0           | 0.010694106 |
|                 | 0.006155816 | 0.02790544  | 0.00876443  | 0.007067633 | 0.009110107 | 0.855706864 |
| TCGA-CD-A48A-01 | 6.6974      | 0.008394101 | 0.009125041 | 0.018065071 | 0           | 0.0102247   |
|                 | 0.003450639 | 0.000380773 | 0.001193481 | 0.004725603 | 0           | 0.944440591 |
| TCGA-CD-A48C-01 | 7.2688      | 0.008979722 | 0.026919752 | 0.009121165 | 0           | 0.014381024 |
|                 | 0.005846341 | 0           | 0.007405495 | 0.006315038 | 0           | 0.921031463 |
| TCGA-CD-A4MG-01 | 6.7078      | 0.018169196 | 0.020668376 | 0.01832492  | 0           | 0.002659819 |
|                 | 0.00752385  | 0           | 0           | 0.004601344 | 0           | 0.928052496 |
| TCGA-CD-A4MH-01 | 6.4743      | 0.013156499 | 0.065720699 | 0           | 0           | 0.008115229 |
|                 | 0           | 0.004711478 | 0.00848003  | 0           | 0.895475315 | 0.00434075  |
| TCGA-CD-A4MI-01 | 7.7042      | 0.029363493 | 0.051482793 | 0.032548337 | 0           | 0.001404673 |
|                 | 0.006462787 | 0           | 0.02943434  | 0.024573514 | 0.003980877 | 0.820749185 |
| TCGA-CD-A4MJ-01 | 7.5928      | 0.004984006 | 0.053365527 | 0.004685909 | 0           | 0.031977452 |
|                 | 0.017004491 | 0           | 0.000880864 | 0.014369208 | 0           | 0.872732543 |
| TCGA-CG-4301-01 | 6.9092      | 0.015325471 | 0.03356695  | 0.035958625 | 0           | 0.038502563 |
|                 | 0.005139032 | 0           | 0.0000551   | 0.020497903 | 0.005922279 | 0.845032044 |
| TCGA-CG-4304-01 | 6.9134      | 0.015812665 | 0.026161045 | 0.02680926  | 0           | 0.054560993 |
|                 | 0.007141871 | 0           | 0.003135479 | 0.020908786 | 0           | 0.845469901 |
| TCGA-CG-4305-01 | 7.6021      | 0.017411081 | 0.050310783 | 0.047769329 | 0           | 0.018287346 |
|                 | 0.010351078 | 0.014844291 | 0.017785686 | 0.021837929 | 0.002734256 | 0.798668222 |
| TCGA-CG-4306-01 | 7.021       | 0.01559384  | 0.049222948 | 0.026654306 | 0           | 0.044631806 |
|                 | 0.006118255 | 0           | 0.005429574 | 0.016675474 | 0           | 0.835673798 |
| TCGA-CG-4436-01 | 5.761       | 0.005139508 | 0.040177345 | 0.010453524 | 0           | 0.05306026  |
|                 | 0.00520788  | 0.017118301 | 0.001830704 | 0.002583592 | 0           | 0.864428886 |
| TCGA-CG-4437-01 | 7.1492      | 0.018028532 | 0.088763742 | 0.025501598 | 0           | 0.019771345 |
|                 | 0.00484082  | 0           | 0.021879339 | 0.015538034 | 0           | 0.805676588 |
| TCGA-CG-4438-01 | 7.106       | 0.011816641 | 0.032468039 | 0.033968844 | 0           | 0.076127626 |
|                 | 0.007347172 | 0.01065349  | 0.00798679  | 0.01370673  | 0           | 0.805924669 |
| TCGA-CG-4440-01 | 8.1226      | 0.007631447 | 0.019137727 | 0.018885072 | 0           | 0.064758073 |
|                 | 0.007055095 | 0.013380725 | 0.000959497 | 0.003420694 | 0           | 0.86477167  |

|                 |             |             |             |             |             |             |
|-----------------|-------------|-------------|-------------|-------------|-------------|-------------|
| TCGA-CG-4441-01 | 7.9576      | 0.011183488 | 0.060386726 | 0.015291441 | 0           | 0.053254859 |
|                 | 0.017830944 | 0           | 0.002877697 | 0.008404178 | 0           | 0.830770667 |
| TCGA-CG-4442-01 | 6.7082      | 0.00429529  | 0.025413249 | 0.005643616 | 0           | 0.016093327 |
|                 | 0.009765437 | 0           | 0           | 0.006546708 | 0           | 0.932242373 |
| TCGA-CG-4443-01 | 7.3312      | 0.006549555 | 0.004651441 | 0.015966668 | 0           | 0.03344162  |
|                 | 0.003867126 | 0           | 0           | 0.026481471 | 0.008328156 | 0.900713964 |
| TCGA-CG-4444-01 | 6.9544      | 0.017924441 | 0.017068692 | 0.03151015  | 0           | 0.032986411 |
|                 | 0.010377572 | 0.001696048 | 0.002581255 | 0.025229827 | 0.001574846 | 0.859050758 |
| TCGA-CG-4449-01 | 7.9274      | 0.010438253 | 0.038161751 | 0.043345449 | 0           | 0.023820025 |
|                 | 0.007440856 | 0.089313786 | 0.000484086 | 0.020693332 | 0.003756527 | 0.762545935 |
| TCGA-CG-4460-01 | 7.2734      | 0.010362547 | 0.011834402 | 0.021629168 | 0           | 0.02584257  |
|                 | 0.005438976 | 0.023927166 | 0.008673967 | 0.007981645 | 0.013306983 | 0.871002575 |
| TCGA-CG-4462-01 | 8.6797      | 0.019911976 | 0.058870634 | 0.095877417 | 0           | 0.092563514 |
|                 | 0.009152341 | 0.004642324 | 0.000959569 | 0.020946601 | 0           | 0.697075622 |
| TCGA-CG-4465-01 | 7.3284      | 0.005954891 | 0.07482781  | 0.04193224  | 0           | 0.080565154 |
|                 | 0.006635951 | 0.048480236 | 0           | 0.010319525 | 0           | 0.731284191 |
| TCGA-CG-4466-01 | 5.9374      | 0.006191676 | 0.071991693 | 0           | 0           | 0.008290335 |
|                 | 0.013728176 | 0           | 0.007612799 | 0           | 0.889397447 | 0.002787874 |
| TCGA-CG-4469-01 | 6.8065      | 0.006621699 | 0.021743239 | 0.024993047 | 0           | 0.040928953 |
|                 | 0.008844198 | 0           | 0           | 0.00613618  | 0           | 0.890732683 |
| TCGA-CG-4472-01 | 7.8191      | 0.022369997 | 0.024744649 | 0.068171973 | 0           | 0.029491329 |
|                 | 0.006114285 | 0.026873796 | 0.006260532 | 0.019059573 | 0.008894392 | 0.788019474 |
| TCGA-CG-4474-01 | 7.3399      | 0.025557318 | 0.047505681 | 0.071617996 | 0           | 0.027274582 |
|                 | 0.015187379 | 0           | 0.004945018 | 0.020427951 | 0           | 0.787484074 |
| TCGA-CG-4475-01 | 7.8451      | 0.006990392 | 0.068972376 | 0.023779849 | 0           | 0.043274688 |
|                 | 0.008653156 | 0.006357155 | 0           | 0.011138141 | 0           | 0.830834243 |
| TCGA-CG-4476-01 | 7.4582      | 0.023864531 | 0.013517695 | 0.059838678 | 0           | 0.058922891 |
|                 | 0.006176548 | 0.016638281 | 0.008076078 | 0.015123261 | 0           | 0.797842036 |
| TCGA-CG-4477-01 | 7.9551      | 0.020084352 | 0.037880133 | 0.032510415 | 0           | 0.101728987 |

|                 |             |             |             |             |             |             |             |
|-----------------|-------------|-------------|-------------|-------------|-------------|-------------|-------------|
|                 | 0.007099009 | 0.003811756 | 0.010621895 | 0.037330329 | 0           | 0.748933124 |             |
| TCGA-CG-5716-01 | 7.0042      | 0.042083887 | 0.010330168 | 0.022618067 | 0           | 0.039320889 |             |
|                 | 0.005707137 | 0.009916221 | 0.005590918 | 0.022684912 | 0           | 0.841747801 |             |
| TCGA-CG-5717-01 | 7.7118      | 0.023956582 | 0.021070231 | 0.026605979 | 0           | 0.052366861 |             |
|                 | 0.003771972 | 0.042463569 | 0.009854573 | 0.009787722 | 0.004156264 | 0.805966249 |             |
| TCGA-CG-5718-01 | 7.3463      | 0.006671477 | 0.070721638 | 0.034642309 | 0           | 0.059682599 |             |
|                 | 0.013832271 | 0           | 0.005521881 | 0.012805388 | 0           | 0.796122436 |             |
| TCGA-CG-5719-01 | 8.2603      | 0.016786265 | 0.027532326 | 0.029546942 | 0           | 0.048218206 |             |
|                 | 0.009598159 | 0           | 0.000474146 | 0.012244164 | 0.001220334 | 0.854379458 |             |
| TCGA-CG-5720-01 | 7.2955      | 0.014622908 | 0.031836533 | 0.038376618 | 0           | 0.055354359 |             |
|                 | 0.014690384 | 0           | 0.004522044 | 0.018926481 | 0           | 0.821670673 |             |
| TCGA-CG-5720-11 | 6.6521      | 0.039905981 | 0.007900386 | 0.036855281 | 0           | 0.074631997 |             |
|                 | 0.00808676  | 0.016833017 | 0.005865969 | 0.019408577 | 0           | 0.790512031 |             |
| TCGA-CG-5721-01 | 8.1057      | 0.046599179 | 0.108495535 | 0.047019759 | 0.001851359 |             |             |
|                 | 0.018609069 | 0.008038337 | 0           | 0.069444767 | 0.023122015 | 0           | 0.67681998  |
| TCGA-CG-5722-01 | 7.1003      | 0.257022185 | 0.021429712 | 0.016895757 | 0           | 0.032097397 | 0           |
|                 | 0           | 0.045975172 | 0.019360928 | 0.028487004 | 0.578731844 |             |             |
| TCGA-CG-5722-11 | 7.329       | 0.028450565 | 0.021417403 | 0.030910684 | 0           | 0.057220917 |             |
|                 | 0.008114827 | 0.003565692 | 0.034961253 | 0.035825921 | 0           | 0.779532738 |             |
| TCGA-CG-5723-01 | 7.1496      | 0.011436258 | 0.152472135 | 0.005434276 | 0           | 0           | 0.001388451 |
|                 | 0.020631538 | 0.032385125 | 0.012045271 | 0           | 0.764206945 |             |             |
| TCGA-CG-5724-01 | 7.776       | 0.006976473 | 0.044148653 | 0.007388922 | 0           | 0.036552837 |             |
|                 | 0.007794541 | 0           | 0.004902533 | 0.006951244 | 0           | 0.885284797 |             |
| TCGA-CG-5725-01 | 6.6942      | 0           | 0.002016261 | 0.014291462 | 0           | 0.000864032 | 0           |
|                 | 0.152226591 | 0           | 0.028000142 | 0.802601512 |             |             |             |
| TCGA-CG-5726-01 | 5.9739      | 0.00654312  | 0.026560322 | 0.010721073 | 0           | 0.031484022 |             |
|                 | 0.009491418 | 0.012872141 | 0           | 0.00093643  | 0           | 0.901391474 |             |
| TCGA-CG-5728-11 | 6.5953      | 0.085823971 | 0.014189954 | 0.018671903 | 0           | 0.024424517 |             |
|                 | 0.001411492 | 0.058861334 | 0.022632203 | 0.020004755 | 0           | 0.75397987  |             |

|                 |             |             |             |             |             |             |             |
|-----------------|-------------|-------------|-------------|-------------|-------------|-------------|-------------|
| TCGA-CG-5730-11 | 6.2062      | 0.01328686  | 0           | 0.049182752 | 0           | 0.092603283 | 0.008060981 |
|                 | 0.006383743 | 0.002731323 | 0.00487579  | 0           | 0.822875268 |             |             |
| TCGA-CG-5732-01 | 6.9374      | 0.033535129 | 0.028764875 | 0.015330097 | 0           | 0.043990664 |             |
|                 | 0.000131912 | 0.067741511 | 0.014717434 | 0.017974406 | 0           | 0.777813973 |             |
| TCGA-CG-5733-11 | 6.2576      | 0.047528405 | 0.011243216 | 0.02631533  | 0           | 0.035077109 |             |
|                 | 0.003928729 | 0.000766028 | 0.019406554 | 0.029426714 | 0           | 0.826307915 |             |
| TCGA-CG-5734-01 | 6.8579      | 0.030051758 | 0.050810153 | 0.023571682 | 0           | 0.040404819 |             |
|                 | 0.007093257 | 0.027515495 | 0.009467778 | 0.027805843 | 0           | 0.783279216 |             |
| TCGA-CG-5734-11 | 6.1115      | 0.005903899 | 0           | 0.041055718 | 0           | 0.070466383 | 0.007855487 |
|                 | 0.01086043  | 0.000886226 | 0.002571702 | 0           | 0.860400155 |             |             |
| TCGA-D7-5577-01 | 7.5855      | 0.007716549 | 0.046140974 | 0.037140175 | 0           | 0.050402425 |             |
|                 | 0.003782254 | 0           | 0.03569291  | 0.01774311  | 0           | 0.801381602 |             |
| TCGA-D7-5578-01 | 7.2873      | 0.024571158 | 0.035029032 | 0.039321298 | 0           | 0.044516396 |             |
|                 | 0.010735514 | 0           | 0.01114455  | 0.017902019 | 0           | 0.816780033 |             |
| TCGA-D7-6518-01 | 8.4188      | 0.016255482 | 0.022875425 | 0.034407076 | 0           | 0.034618266 |             |
|                 | 0.008494599 | 0.002591417 | 0.002327468 | 0.018439031 | 0.004396457 | 0.855594777 |             |
| TCGA-D7-6519-01 | 7.6869      | 0.009925876 | 0.019273181 | 0.015274204 | 0           | 0.027570147 |             |
|                 | 0.010229904 | 0           | 0.008931718 | 0.005559853 | 0.003502046 | 0.899733071 |             |
| TCGA-D7-6520-01 | 7.7262      | 0.010626834 | 0.035218602 | 0.021959479 | 0           | 0.086838808 |             |
|                 | 0.010645473 | 0           | 0           | 0.01127397  | 0           | 0.823436834 |             |
| TCGA-D7-6521-01 | 7.8157      | 0.022013226 | 0.025188432 | 0.028791964 | 0           | 0.081787873 |             |
|                 | 0.005885037 | 0.010218013 | 0.013548735 | 0.009885763 | 0           | 0.802680957 |             |
| TCGA-D7-6522-01 | 8.7099      | 0.12647203  | 0.046232817 | 0.080876094 | 0.011673198 |             |             |
|                 | 0.003694621 | 0.006065571 | 0.118031868 | 0.040187317 | 0.028805459 | 0           | 0.537961024 |
| TCGA-D7-6524-01 | 8.5711      | 0.013114128 | 0.082993463 | 0.022271315 | 0           | 0.097167506 |             |
|                 | 0.010141385 | 0           | 0.001147751 | 0.018225962 | 0           | 0.754938491 |             |
| TCGA-D7-6525-01 | 7.7835      | 0.007100703 | 0.045332816 | 0.013740968 | 0           | 0.039005995 |             |
|                 | 0.00706044  | 0.020352947 | 0.0019336   | 0.003431278 | 0           | 0.862041252 |             |
| TCGA-D7-6526-01 | 6.6356      | 0.009200603 | 0.012045896 | 0.013434056 | 0           | 0.044962057 |             |
|                 | 0.00985202  | 0.033190667 | 0           | 0.004904668 | 0.00150463  | 0.870905403 |             |

|                 |             |             |             |             |             |             |             |
|-----------------|-------------|-------------|-------------|-------------|-------------|-------------|-------------|
| TCGA-D7-6527-01 | 7.4677      | 0.007878889 | 0.014703412 | 0.015917666 | 0           | 0.025697201 |             |
|                 | 0.005817659 | 0.007844135 | 0.002771535 | 0.020462051 | 0           | 0.898907452 |             |
| TCGA-D7-6528-01 | 7.036       | 0.006868795 | 0.019441894 | 0.003377347 | 0           | 0.052374834 |             |
|                 | 0.011444611 | 0.00531651  | 0           | 0.00272109  | 0           | 0.898454917 |             |
| TCGA-D7-6815-01 | 7.32        | 0.010736792 | 0.012009641 | 0.038450276 | 0           | 0.086124365 |             |
|                 | 0.010678902 | 0           | 0.001927318 | 0.00981124  | 0           | 0.830261467 |             |
| TCGA-D7-6817-01 | 7.3227      | 0.044656387 | 0.024772284 | 0.021488145 | 0           | 0.050153433 |             |
|                 | 0.014537976 | 0           | 0.004134917 | 0.015059142 | 0.002622609 | 0.822575107 |             |
| TCGA-D7-6818-01 | 9.04        | 0.010089709 | 0.027162118 | 0.064733776 | 0           | 0.050856851 |             |
|                 | 0.013506287 | 0.028828416 | 0           | 0.018177644 | 0.00955812  | 0.777087079 |             |
| TCGA-D7-6820-01 | 8.1858      | 0           | 0.058008537 | 0.008092224 | 0           | 0.01583772  | 0           |
|                 | 0.089973798 | 0.000094    | 0.027290315 | 0           | 0.800703407 |             |             |
| TCGA-D7-6822-01 | 7.9663      | 0.005802181 | 0.017264004 | 0.017185808 | 0           | 0.073060618 | 0           |
|                 | 0           | 0.058813667 | 0.017755201 | 0.008669092 | 0.80144943  |             |             |
| TCGA-D7-8570-01 | 7.7933      | 0.030138623 | 0.07930672  | 0.061872679 | 0           | 0.027115472 |             |
|                 | 0.01143062  | 0           | 0.016010585 | 0.047547793 | 0           | 0.726577506 |             |
| TCGA-D7-8572-01 | 7.9823      | 0.013904543 | 0.07402986  | 0.028874498 | 0           | 0.050153892 |             |
|                 | 0.0151761   | 0.02380494  | 0.016700502 | 0.029092129 | 0           | 0.748263535 |             |
| TCGA-D7-8573-01 | 7.0041      | 0.005190459 | 0.024935529 | 0.002246896 | 0           | 0.028642703 |             |
|                 | 0.009269416 | 0           | 0.00000595  | 0.011631281 | 0           | 0.91807777  |             |
| TCGA-D7-8574-01 | 7.8438      | 0.140351452 | 0.010294685 | 0.058015964 | 0.00808949  |             |             |
|                 | 0.002158965 | 0.007960668 | 0.053585329 | 0.035261772 | 0.031450549 | 0           | 0.652831126 |
| TCGA-D7-8575-01 | 7.5155      | 0.032252651 | 0.029637493 | 0.05401155  | 0           | 0.062824938 |             |
|                 | 0.011671513 | 0           | 0.003734305 | 0.017534186 | 0           | 0.788333365 |             |
| TCGA-D7-8576-01 | 7.276       | 0.016772735 | 0.012019106 | 0.03560797  | 0           | 0.032919102 |             |
|                 | 0.01934917  | 0           | 0           | 0.005246642 | 0.002380757 | 0.875704518 |             |
| TCGA-D7-8578-01 | 7.5829      | 0.023134345 | 0.051183458 | 0.01194878  | 0           | 0.039258708 |             |
|                 | 0.00879131  | 0           | 0.009582101 | 0.012976018 | 0           | 0.84312528  |             |
| TCGA-D7-8579-01 | 7.6174      | 0.018742794 | 0.022133558 | 0.029881507 | 0           | 0.041514939 |             |

|                 |             |             |             |             |             |             |             |   |   |
|-----------------|-------------|-------------|-------------|-------------|-------------|-------------|-------------|---|---|
|                 | 0.010217858 | 0.01350734  | 0.001708917 | 0.015096059 | 0.005946141 | 0.841250887 |             |   |   |
| TCGA-D7-A4YT-01 | 7.1053      | 0.012109084 | 0.064022603 | 0.004192123 | 0           | 0.017712028 |             |   |   |
|                 | 0.015425512 | 0.001584779 | 0           | 0.021710983 | 0           | 0.863242888 |             |   |   |
| TCGA-D7-A4YU-01 | 7.5984      | 0.058030968 | 0.049057924 | 0.053245506 | 0.009040104 |             |             |   |   |
|                 | 0.03657774  | 0.014997882 | 0           | 0.029396552 | 0.049077344 | 0           | 0.700575981 |   |   |
| TCGA-D7-A4YV-01 | 7.5321      | 0.029111816 | 0.028436986 | 0.043304074 | 0           | 0.02358563  |             |   |   |
|                 | 0.014758124 | 0.003293009 | 0.055868421 | 0.022031015 | 0.002397996 | 0.77721293  |             |   |   |
| TCGA-D7-A4YX-01 | 6.9217      | 0.020256832 | 0.094832873 | 0.006457326 | 0           | 0.04552537  |             |   |   |
|                 | 0.009632877 | 0           | 0.022615498 | 0.013032295 | 0           | 0.787646929 |             |   |   |
| TCGA-D7-A4YY-01 | 6.9638      | 0.046737333 | 0.042130992 | 0.031638401 | 0           | 0.024435403 |             |   |   |
|                 | 0.007635613 | 0           | 0.00538796  | 0.007983787 | 0           | 0.834050513 |             |   |   |
| TCGA-D7-A4ZO-01 | 7.3542      | 0.029410972 | 0.036314766 | 0.027701812 | 0           | 0.03329652  |             |   |   |
|                 | 0.010098244 | 0           | 0.000881685 | 0.013871012 | 0           | 0.848424988 |             |   |   |
| TCGA-D7-A6EV-01 | 7.6102      | 0.009024974 | 0.064184576 | 0.006259445 | 0           | 0.025248222 |             |   |   |
|                 | 0.013305011 | 0           | 0           | 0.007082825 | 0           | 0.874894948 |             |   |   |
| TCGA-D7-A6EX-01 | 7.5258      | 0.012360275 | 0           | 0.003670619 | 0           | 0           | 0.002698442 | 0 | 0 |
|                 | 0.021329875 | 0.219437504 | 0.740503286 |             |             |             |             |   |   |
| TCGA-D7-A6EY-01 | 7.7302      | 0.064076975 | 0.083590134 | 0.015753238 | 0           | 0.014883959 |             |   |   |
|                 | 0.011272639 | 0.01341321  | 0.020000874 | 0.021588557 | 0           | 0.755420415 |             |   |   |
| TCGA-D7-A6EZ-01 | 7.9985      | 0.007105488 | 0.09391804  | 0.020364841 | 0           | 0.052082632 |             |   |   |
|                 | 0.008733111 | 0           | 0.022114043 | 0.029476999 | 0           | 0.766204846 |             |   |   |
| TCGA-D7-A6F0-01 | 7.331       | 0.011105083 | 0.015868275 | 0.025853984 | 0           | 0.050896622 |             |   |   |
|                 | 0.007541168 | 0           | 0.014907105 | 0.012343517 | 0.004525305 | 0.856958942 |             |   |   |
| TCGA-D7-A6F2-01 | 6.7315      | 0.009824369 | 0.009927519 | 0.023075897 | 0           | 0.041930873 |             |   |   |
|                 | 0.004940726 | 0           | 0.008619273 | 0.015654512 | 0           | 0.886026831 |             |   |   |
| TCGA-D7-A747-01 | 7.6606      | 0.037582635 | 0.009057562 | 0.028994766 | 0           | 0.01172493  |             |   |   |
|                 | 0.00507005  | 0.052887403 | 0.006408444 | 0.009618026 | 0.006972665 | 0.831683518 |             |   |   |
| TCGA-D7-A748-01 | 7.7795      | 0.015257357 | 0.041371957 | 0.094876591 | 0           | 0.035405354 |             |   |   |
|                 | 0.002942693 | 0           | 0.0000015   | 0.015986358 | 0           | 0.794158188 |             |   |   |
| TCGA-D7-A74A-01 | 6.7791      | 0.006053095 | 0.006353252 | 0.010688007 | 0           | 0.02800187  |             |   |   |

|                 |             |             |             |             |             |             |
|-----------------|-------------|-------------|-------------|-------------|-------------|-------------|
|                 | 0.002963357 | 0.012851058 | 0.001867868 | 0.004917717 | 0           | 0.926303776 |
| TCGA-EQ-8122-01 | 7.2603      | 0.007295337 | 0.028730983 | 0.017691816 | 0           | 0.051067235 |
|                 | 0.009180246 | 0.02214799  | 0           | 0.003861379 | 0           | 0.860025014 |
| TCGA-EQ-A450-01 | 6.1723      | 0.012360926 | 0.014907811 | 0.015509122 | 0           | 0.02780769  |
|                 | 0.006833033 | 0.01639732  | 0           | 0.002293998 | 0           | 0.903890101 |
| TCGA-F1-6177-01 | 6.8501      | 0.009034391 | 0.039174026 | 0.021700385 | 0           | 0.055419979 |
|                 | 0.013363025 | 0.065024865 | 0           | 0.008054741 | 0           | 0.788228588 |
| TCGA-F1-6874-01 | 8.0185      | 0.014820662 | 0.073119948 | 0.01921983  | 0           | 0.110107129 |
|                 | 0.019501413 | 0           | 0.008471471 | 0.021686438 | 0           | 0.733073109 |
| TCGA-F1-6875-01 | 8.1782      | 0           | 0.016516777 | 0.005900473 | 0           | 0.063244609 |
|                 | 0.002831258 | 0.016810726 | 0.081794283 | 0.003485489 | 0.792052865 | 0.01736352  |
| TCGA-F1-A448-01 | 7.5269      | 0.026287396 | 0.06374624  | 0.019033513 | 0           | 0.03605479  |
|                 | 0.007542099 | 0.012299021 | 0.002538829 | 0.021783255 | 0           | 0.810714858 |
| TCGA-F1-A72C-01 | 7.3777      | 0.016920981 | 0.065440961 | 0.0115801   | 0           | 0.030691792 |
|                 | 0.006601036 | 0.026526273 | 0.006441061 | 0.009689566 | 0           | 0.82610823  |
| TCGA-FP-7735-01 | 7.2921      | 0.022640615 | 0.011248952 | 0.022574902 | 0           | 0.046032592 |
|                 | 0.009835941 | 0           | 0.00373173  | 0.008610921 | 0.000978879 | 0.874345468 |
| TCGA-FP-7735-11 | 8.2045      | 0.005016479 | 0.000602104 | 0.017552254 | 0.050825753 | 0           |
|                 | 0.013267762 | 0.048210361 | 0           | 0.003786232 | 0           | 0.860739056 |
| TCGA-FP-7829-01 | 7.6622      | 0.005262401 | 0.022233954 | 0.020420383 | 0           | 0.06038464  |
|                 | 0.01277214  | 0.018344668 | 0           | 0.005355821 | 0           | 0.855225994 |
| TCGA-FP-7829-11 | 8.7232      | 0.007583565 | 0.00955861  | 0.019854654 | 0.043497818 |             |
|                 | 0.014281496 | 0.014366523 | 0.038046237 | 0           | 0.005150096 | 0.847661001 |
| TCGA-FP-7916-01 | 7.6398      | 0.04706815  | 0.068135896 | 0.054327175 | 0.000928849 |             |
|                 | 0.030828838 | 0.009948504 | 0           | 0.04748659  | 0.048735307 | 0.692540691 |
| TCGA-FP-7998-01 | 8.1819      | 0.042100968 | 0.099453747 | 0.084812703 | 0.01149624  |             |
|                 | 0.026940731 | 0.013210895 | 0           | 0.155310194 | 0.064728168 | 0.501946354 |
| TCGA-FP-8099-01 | 7.4937      | 0.012820198 | 0.052186711 | 0.019421517 | 0           | 0.047504345 |
|                 | 0.011905372 | 0           | 0           | 0.014695155 | 0           | 0.841466702 |

|                 |             |             |             |             |             |             |             |
|-----------------|-------------|-------------|-------------|-------------|-------------|-------------|-------------|
| TCGA-FP-8209-01 | 8.4462      | 0.099434939 | 0.016574765 | 0.062620529 | 0.033363362 |             |             |
|                 | 0.000796969 | 0.009525633 | 0.180330241 | 0.035805411 | 0.029729237 | 0           | 0.531818915 |
| TCGA-FP-8210-01 | 8.1199      | 0.095966585 | 0.020168572 | 0.053112229 | 0           | 0.01533696  |             |
|                 | 0.006373804 | 0.114805596 | 0.031784025 | 0.027230189 | 0.010141171 | 0.62508087  |             |
| TCGA-FP-8211-01 | 7.3316      | 0.011123816 | 0.051647016 | 0           | 0           | 0.011947129 | 0.008913162 |
|                 | 0.020414158 | 0.010174649 | 0.004577632 | 0           | 0.881202438 |             |             |
| TCGA-FP-8631-01 | 6.6685      | 0.021033774 | 0.058597794 | 0.003640356 | 0           | 0.02234873  |             |
|                 | 0.015345043 | 0           | 0           | 0.007276604 | 0           | 0.871757699 |             |
| TCGA-FP-A4BE-01 | 7.246       | 0.012814528 | 0.058789771 | 0.053957629 | 0           | 0.01299176  |             |
|                 | 0.01484719  | 0.002043813 | 0.018775868 | 0.034210525 | 0           | 0.791568916 |             |
| TCGA-FP-A4BF-01 | 7.0323      | 0.016374163 | 0.043047406 | 0.071355358 | 0           | 0.011373027 |             |
|                 | 0.008197046 | 0.001158295 | 0.032934241 | 0.030851514 | 0           | 0.78470895  |             |
| TCGA-FP-A8CX-01 | 6.5702      | 0.013785012 | 0.017822659 | 0.020691348 | 0           | 0.041308509 |             |
|                 | 0.007355027 | 0           | 0.002342611 | 0.012318553 | 0           | 0.884376279 |             |
| TCGA-FP-A9TM-01 | 7.0277      | 0.096112039 | 0.017748086 | 0.016733045 | 0           | 0.038614962 |             |
|                 | 0.007706362 | 0.020149289 | 0.001897493 | 0.008120312 | 0.0020613   | 0.790857112 |             |
| TCGA-HF-7131-01 | 8.3895      | 0.020674209 | 0.023552635 | 0.023046705 | 0           | 0.080960427 |             |
|                 | 0.010901037 | 0           | 0.00630049  | 0.015684764 | 0           | 0.818879733 |             |
| TCGA-HF-7132-01 | 7.5449      | 0.035370433 | 0.046617538 | 0.043791829 | 0           | 0.038136005 |             |
|                 | 0.021584835 | 0.052497099 | 0.018010341 | 0.029874185 | 0           | 0.714117735 |             |
| TCGA-HF-7133-01 | 8.0127      | 0.018941495 | 0.044103682 | 0.028638796 | 0           | 0.036275064 |             |
|                 | 0.008885325 | 0.006495663 | 0.01296643  | 0.021684834 | 0.015736572 | 0.806272138 |             |
| TCGA-HF-7134-01 | 7.1147      | 0.0173206   | 0.049451539 | 0.027973088 | 0           | 0.063295822 |             |
|                 | 0.023070345 | 0           | 0           | 0.01174526  | 0           | 0.807143346 |             |
| TCGA-HF-7136-01 | 8.0799      | 0.008710927 | 0.0318515   | 0.020600751 | 0           | 0.079685034 |             |
|                 | 0.011089462 | 0.010063304 | 0.00258524  | 0.015305347 | 0           | 0.820108436 |             |
| TCGA-HF-A5NB-01 | 8.1503      | 0.009624914 | 0.037852672 | 0.015527078 | 0           | 0.02035003  |             |
|                 | 0.012491457 | 0.034820399 | 0.00414414  | 0.003442141 | 0           | 0.861747171 |             |
| TCGA-HJ-7597-01 | 8.1604      | 0.022229993 | 0.085854137 | 0.007164458 | 0           | 0.032390286 |             |
|                 | 0.012472581 | 0           | 0.025573985 | 0.009568378 | 0           | 0.804746183 |             |

|                 |             |             |             |             |             |                         |
|-----------------|-------------|-------------|-------------|-------------|-------------|-------------------------|
| TCGA-HU-8238-01 | 6.5156      | 0.012608865 | 0.017717781 | 0.019359514 | 0           | 0.026828741             |
|                 | 0.00490024  | 0.005583845 | 0.00213484  | 0.009086473 | 0           | 0.901779701             |
|                 |             |             |             |             |             |                         |
| TCGA-HU-8238-11 | 6.5008      | 0.002748038 | 0           | 0.14339193  | 0           | 0.223279173 0.011529315 |
|                 | 0.020894526 | 0.003271806 | 0.000327344 | 0           | 0.594557869 |                         |
|                 |             |             |             |             |             |                         |
| TCGA-HU-8243-01 | 6.9694      | 0.012756506 | 0.06012252  | 0.001709012 | 0           | 0.037038583             |
|                 | 0.006079623 | 0.013604012 | 0           | 0.007848322 | 0           | 0.86084142              |
|                 |             |             |             |             |             |                         |
| TCGA-HU-8244-01 | 5.1563      | 0.007291117 | 0.006118218 | 0.015882231 | 0           | 0.02583009              |
|                 | 0.01110506  | 0.009885296 | 0           | 0.001671731 | 0           | 0.922216256             |
|                 |             |             |             |             |             |                         |
| TCGA-HU-8249-01 | 6.2476      | 0.008289326 | 0.021158284 | 0.032070254 | 0           | 0.038100926             |
|                 | 0.006025784 | 0           | 0.006677803 | 0.014876535 | 0           | 0.872801089             |
|                 |             |             |             |             |             |                         |
| TCGA-HU-8602-01 | 8.3286      | 0.007895007 | 0.130744769 | 0.008721214 | 0           | 0.052631536             |
|                 | 0.018417686 | 0           | 0.007781379 | 0.036075232 | 0           | 0.737733176             |
|                 |             |             |             |             |             |                         |
| TCGA-HU-8604-01 | 6.9721      | 0.011238202 | 0.043473712 | 0.034018792 | 0           | 0.049218403             |
|                 | 0.009587123 | 0           | 0.03060411  | 0.026051674 | 0           | 0.795807984             |
|                 |             |             |             |             |             |                         |
| TCGA-HU-8608-01 | 7.913       | 0.038457037 | 0.209467203 | 0.027583974 | 0           | 0.075403272             |
|                 | 0.010102598 | 0           | 0.071643002 | 0.093023434 | 0           | 0.47431948              |
|                 |             |             |             |             |             |                         |
| TCGA-HU-8610-01 | 8.0956      | 0.01681533  | 0.093544262 | 0.009934746 | 0           | 0.044626444             |
|                 | 0.014333069 | 0           | 0.000499982 | 0.054842416 | 0           | 0.76540375              |
|                 |             |             |             |             |             |                         |
| TCGA-HU-A4G2-01 | 6.9291      | 0.010009073 | 0.015711589 | 0.014636902 | 0           | 0.028142792             |
|                 | 0.004266596 | 0           | 0.00790701  | 0.00597881  | 0.002144676 | 0.911202553             |
|                 |             |             |             |             |             |                         |
| TCGA-HU-A4G3-01 | 6.2941      | 0.008448699 | 0.01842979  | 0.010720152 | 0           | 0.020146241             |
|                 | 0.007562339 | 0           | 0           | 0.003017668 | 0           | 0.931675111             |
|                 |             |             |             |             |             |                         |
| TCGA-HU-A4G3-11 | 7.4291      | 0.007316966 | 0.001593113 | 0.015445997 | 0.037303472 | 0                       |
|                 | 0.011552525 | 0.048353314 | 0           | 0.006235377 | 0.002068749 | 0.870130487             |
|                 |             |             |             |             |             |                         |
| TCGA-HU-A4G6-01 | 5.9647      | 0.005810838 | 0.039651833 | 0           | 0           | 0.019713681 0.007310645 |
|                 | 0           | 0           | 0.012228475 | 0           | 0.915284528 |                         |
|                 |             |             |             |             |             |                         |
| TCGA-HU-A4G8-01 | 7.5683      | 0.026328443 | 0.044545102 | 0.00745384  | 0           | 0.014811028             |
|                 | 0.013904658 | 0           | 0.00592242  | 0.014173718 | 0           | 0.872860791             |
|                 |             |             |             |             |             |                         |
| TCGA-HU-A4G9-01 | 6.0023      | 0.009585367 | 0.027368096 | 0.00926448  | 0           | 0.021139815             |
|                 | 0.011008975 | 0           | 0           | 0.005798092 | 0           | 0.915835175             |

|                 |             |             |             |             |             |                         |
|-----------------|-------------|-------------|-------------|-------------|-------------|-------------------------|
| TCGA-HU-A4GC-01 | 6.0068      | 0.009385802 | 0.012240688 | 0.010372866 | 0           | 0.050009561             |
|                 | 0.005367081 | 0           | 0.004617401 | 0.004409511 | 0           | 0.903597092             |
| TCGA-HU-A4GC-11 | 7.3819      | 0.006429185 | 0.003631189 | 0.013055534 | 0.031427836 |                         |
|                 | 0.000655004 | 0.009313402 | 0.035145268 | 0           | 0.005060274 | 0.001886465 0.893395843 |
| TCGA-HU-A4GD-01 | 4.9486      | 0.007789105 | 0.026437457 | 0.004348311 | 0           | 0.011297266             |
|                 | 0.009453024 | 0           | 0.00294816  | 0.004684166 | 0           | 0.933042512             |
| TCGA-HU-A4GF-01 | 7.0237      | 0.011935363 | 0.03900941  | 0.023773476 | 0           | 0.042696396             |
|                 | 0.010502245 | 0           | 0.006792593 | 0.016884668 | 0           | 0.848405848             |
| TCGA-HU-A4GH-01 | 7.1048      | 0.008973832 | 0.031750793 | 0.015574748 | 0           | 0.022274477             |
|                 | 0.007519414 | 0.008096038 | 0.000434678 | 0.006739448 | 0           | 0.898636571             |
| TCGA-HU-A4GH-11 | 7.8281      | 0.008425194 | 0.027682534 | 0.018410228 | 0.031710248 |                         |
|                 | 0.015506602 | 0.010962686 | 0.038293735 | 0           | 0.007363838 | 0.841644936             |
| TCGA-HU-A4GJ-01 | 7.8117      | 0.270004545 | 0.00932278  | 0.040196397 | 0           | 0.004970233             |
|                 | 0.0079796   | 0.069757491 | 0.036184795 | 0.028623531 | 0.018053956 | 0.514906672             |
| TCGA-HU-A4GN-01 | 6.4858      | 0.009555721 | 0.065909244 | 0.004084393 | 0           | 0.009869468             |
|                 | 0.010894006 | 0           | 0.008123673 | 0.010082754 | 0           | 0.881480741             |
| TCGA-HU-A4GN-11 | 7.6792      | 0.00671687  | 0.00728216  | 0.024674811 | 0           | 0.040720908             |
|                 | 0.007795349 | 0.020199461 | 0           | 0.005754317 | 0           | 0.886856125             |
| TCGA-HU-A4GP-01 | 6.5037      | 0.011892788 | 0.009344703 | 0.013164905 | 0           | 0.030513789             |
|                 | 0.006040843 | 0           | 0.000854475 | 0.004808913 | 0           | 0.923379583             |
| TCGA-HU-A4GP-11 | 7.6279      | 0.006349859 | 0.000916121 | 0.015440331 | 0.034881176 |                         |
|                 | 0.002217419 | 0.011688989 | 0.057420989 | 0.0000368   | 0.006141741 | 0.007048065             |
|                 | 0.857858518 |             |             |             |             |                         |
| TCGA-HU-A4GQ-01 | 6.4591      | 0.005219262 | 0.028723447 | 0.022900849 | 0           | 0.026654647             |
|                 | 0.009099378 | 0.009078582 | 0.003271883 | 0.005532305 | 0           | 0.889519647             |
| TCGA-HU-A4GT-01 | 6.1538      | 0.005293411 | 0.028017556 | 0.01198224  | 0           | 0.026062143             |
|                 | 0.005901368 | 0.029049528 | 0.000589808 | 0.005027194 | 0           | 0.888076753             |
| TCGA-HU-A4GU-01 | 6.6005      | 0.005168476 | 0.038924141 | 0.015823132 | 0           | 0.053337012             |
|                 | 0.021110959 | 0           | 0           | 0.017777153 | 0           | 0.847859127             |
| TCGA-HU-A4GX-01 | 5.9768      | 0.011834698 | 0.013276516 | 0.02033955  | 0           | 0.018856682             |

|                 |             |             |             |             |             |             |             |
|-----------------|-------------|-------------|-------------|-------------|-------------|-------------|-------------|
|                 | 0.00828844  | 0           | 0.033552978 | 0.004476232 | 0.000833507 | 0.888541398 |             |
|                 |             |             |             |             |             |             |             |
| TCGA-HU-A4GY-01 | 7.7011      | 0.089984154 | 0.016741882 | 0.059868464 | 0           | 0.003366892 |             |
|                 | 0.007864954 | 0.06956842  | 0.023028185 | 0.024723844 | 0.007014245 | 0.697838961 |             |
|                 |             |             |             |             |             |             |             |
| TCGA-HU-A4GY-11 | 8.0135      | 0.007802304 | 0.002773189 | 0.020048962 | 0.034753902 | 0           |             |
|                 | 0.010928104 | 0.045925496 | 0           | 0.006812266 | 0.00172354  | 0.869232237 |             |
|                 |             |             |             |             |             |             |             |
| TCGA-HU-A4H0-01 | 6.7727      | 0.00879976  | 0.047504525 | 0.028178883 | 0           | 0.052188995 |             |
|                 | 0.008639522 | 0           | 0.024630714 | 0.01764031  | 0           | 0.812417291 |             |
|                 |             |             |             |             |             |             |             |
| TCGA-HU-A4H2-01 | 6.264       | 0.008504559 | 0.018358409 | 0.007073236 | 0           | 0.013939045 |             |
|                 | 0.005977621 | 0           | 0.007004924 | 0.007977486 | 0           | 0.931164721 |             |
|                 |             |             |             |             |             |             |             |
| TCGA-HU-A4H3-01 | 7.7063      | 0.005143699 | 0.076585649 | 0           | 0           | 0           | 0.013400794 |
|                 | 0.006821246 | 0.011617684 | 0           | 0.886430927 |             |             |             |
|                 |             |             |             |             |             |             |             |
| TCGA-HU-A4H4-01 | 7.0814      | 0.014631515 | 0.0444296   | 0.007866528 | 0           | 0.028835806 |             |
|                 | 0.005992949 | 0           | 0.019933511 | 0.019539779 | 0           | 0.858770313 |             |
|                 |             |             |             |             |             |             |             |
| TCGA-HU-A4H5-01 | 7.6142      | 0.006443838 | 0.027750032 | 0.003007784 | 0           | 0.091598057 |             |
|                 | 0.002793913 | 0.028220481 | 0           | 0.005120345 | 0           | 0.83506555  |             |
|                 |             |             |             |             |             |             |             |
| TCGA-HU-A4H6-01 | 6.6479      | 0.031539203 | 0.027693893 | 0.007201834 | 0           | 0.021180921 |             |
|                 | 0.004840199 | 0           | 0.001649515 | 0.008457556 | 0           | 0.897436878 |             |
|                 |             |             |             |             |             |             |             |
| TCGA-HU-A4H8-01 | 6.1079      | 0.012374908 | 0.017018022 | 0.013217793 | 0           | 0.026174212 |             |
|                 | 0.010635134 | 0           | 0.000336372 | 0.009196054 | 0           | 0.911047504 |             |
|                 |             |             |             |             |             |             |             |
| TCGA-HU-A4HB-01 | 7.3401      | 0.12168978  | 0.013777167 | 0.042571803 | 0           | 0.056735911 |             |
|                 | 0.010339314 | 0           | 0.014271218 | 0.022519049 | 0           | 0.718095757 |             |
|                 |             |             |             |             |             |             |             |
| TCGA-HU-A4HB-11 | 7.5521      | 0.007473006 | 0.011516005 | 0.01362283  | 0.033186012 |             |             |
|                 | 0.004256963 | 0.01200417  | 0.04758204  | 0           | 0.006768675 | 0           | 0.863590299 |
|                 |             |             |             |             |             |             |             |
| TCGA-HU-A4HD-01 | 7.0865      | 0.006649738 | 0.016380244 | 0.015477242 | 0           | 0.029394649 |             |
|                 | 0.006321409 | 0           | 0.007465766 | 0.008541161 | 0           | 0.909769792 |             |
|                 |             |             |             |             |             |             |             |
| TCGA-IN-7806-01 | 6.8212      | 0.018696393 | 0.010509309 | 0.021774476 | 0           | 0.04674247  |             |
|                 | 0.017721699 | 0           | 0           | 0.00111664  | 0.001216093 | 0.88222292  |             |
|                 |             |             |             |             |             |             |             |
| TCGA-IN-7806-11 | 7.09        | 0.008572168 | 0.015568014 | 0.015951795 | 0           | 0.044390811 |             |
|                 | 0.006394579 | 0.006429305 | 0.002174886 | 0.001753568 | 0           | 0.898764874 |             |

|                 |        |             |             |             |             |             |             |             |             |             |             |             |
|-----------------|--------|-------------|-------------|-------------|-------------|-------------|-------------|-------------|-------------|-------------|-------------|-------------|
| TCGA-IN-7808-01 | 7.5649 | 0.1383357   | 0.010669958 | 0.024319775 | 0.004443024 | 0.004965878 | 0.004479989 | 0.112516389 | 0.028014346 | 0.023843556 | 0           | 0.648411385 |
| TCGA-IN-8462-01 | 7.5261 | 0.010322192 | 0.015200432 | 0.014904332 | 0           | 0.004592589 | 0           | 0.000946832 | 0.007186179 | 0.00054024  | 0.921695135 |             |
| TCGA-IN-8462-11 | 6.5676 | 0.008662495 | 0.011695786 | 0.016382757 | 0           | 0.003535079 | 0.01182058  | 0           | 0.005309307 | 0.002986157 | 0.894900854 |             |
| TCGA-IN-8663-01 | 8.2448 | 0.006615714 | 0.034367835 | 0.004847726 | 0           | 0.01019183  | 0           | 0.00108693  | 0.017459054 | 0.001241333 | 0.877703209 |             |
| TCGA-IN-8663-11 | 6.2205 | 0.007415483 | 0.011217582 | 0.011210822 | 0           | 0.003814856 | 0.015521178 | 0           | 0.001911433 | 0           | 0.901812068 |             |
| TCGA-IN-A6RI-01 | 7.0263 | 0.003303467 | 0.029839627 | 0.007274286 | 0           | 0.006177129 | 0.025327374 | 0           | 0.004165183 | 0.003922919 | 0.895336091 |             |
| TCGA-IN-A6RJ-01 | 6.0717 | 0.007545422 | 0.008473353 | 0.01112683  | 0           | 0.003904838 | 0.007219884 | 0.0000131   | 0.002055663 | 0           | 0.923915011 |             |
| TCGA-IN-A6RL-01 | 6.7791 | 0.016069909 | 0.018010465 | 0.021868653 | 0           | 0.00771199  | 0           | 0.001149685 | 0.007846888 | 0           | 0.90602061  |             |
| TCGA-IN-A6RO-01 | 7.2526 | 0.003015204 | 0.035971703 | 0.015790582 | 0           | 0.017163216 | 0.022007914 | 0           | 0.004816946 | 0.012333799 | 0.845870016 |             |
| TCGA-IN-A6RR-01 | 7.315  | 0.016238859 | 0.048824995 | 0.003659175 | 0           | 0.004554706 | 0           | 0.003691582 | 0.006119204 | 0           | 0.899805816 |             |
| TCGA-IN-A6RS-01 | 6.4153 | 0.007292453 | 0.051335831 | 0.002109687 | 0           | 0.008225134 | 0           | 0.009169228 | 0.010685329 | 0           | 0.890901528 |             |
| TCGA-IN-A7NR-01 | 6.7568 | 0.018438217 | 0.013596552 | 0.016400454 | 0           | 0.003994841 | 0.019859741 | 0.004965169 | 0.005985594 | 0           | 0.880802549 |             |
| TCGA-IN-A7NT-01 | 7.0855 | 0.006144499 | 0.102371752 | 0           | 0           | 0.004400828 | 0.00176586  | 0.013192378 | 0           | 0.820625716 |             | 0.012100628 |
| TCGA-IN-A7NU-01 | 8.2842 | 0.007890482 | 0.049270141 | 0.016408229 | 0           | 0.003278394 | 0.00045371  | 0.004710642 | 0.015768711 | 0           | 0.878901026 |             |
| TCGA-IN-AB1V-01 | 6.8731 | 0.015710075 | 0.008535488 | 0.015269912 | 0           | 0.005507578 | 0.005763784 | 0.001680453 | 0.007569067 | 0.002005222 | 0.884663381 |             |

|                 |             |             |             |             |             |             |
|-----------------|-------------|-------------|-------------|-------------|-------------|-------------|
| TCGA-IN-AB1V-11 | 7.1851      | 0.012843191 | 0.008230415 | 0.027305409 | 0           | 0.050072724 |
|                 | 0.009035632 | 0.011580812 | 0.00204619  | 0.004503964 | 0.006629022 | 0.867752641 |
| TCGA-IN-AB1X-01 | 7.3208      | 0.031846957 | 0.113616795 | 0.014110104 | 0           | 0.057856752 |
|                 | 0.013303848 | 0           | 0.050581395 | 0.038845236 | 0           | 0.679838912 |
| TCGA-IN-AB1X-11 | 6.7663      | 0.00989999  | 0.013592234 | 0.017115712 | 0           | 0.04834974  |
|                 | 0.004886874 | 0.011351226 | 0           | 0.00355047  | 0           | 0.891253753 |
| TCGA-IP-7968-01 | 8.0933      | 0.012431453 | 0.035737251 | 0.027342832 | 0           | 0.033085769 |
|                 | 0.013428996 | 0           | 0.02205589  | 0.019864474 | 0           | 0.836053335 |
| TCGA-IP-7968-11 | 7.2887      | 0.009888296 | 0.015862927 | 0.018007994 | 0           | 0.046622842 |
|                 | 0.003193125 | 0.011425023 | 0.000236149 | 0.008103782 | 0           | 0.88665986  |
| TCGA-KB-A6F7-01 | 7.3146      | 0.01251651  | 0.063328126 | 0.027373952 | 0           | 0.03496139  |
|                 | 0.009842194 | 0           | 0.029959624 | 0.024932136 | 0           | 0.797086067 |
| TCGA-KB-A93G-01 | 8.8101      | 0.013992513 | 0.117000464 | 0.027220489 | 0           | 0.113502597 |
|                 | 0.011364534 | 0           | 0           | 0.021168522 | 0           | 0.695750882 |
| TCGA-KB-A93H-01 | 6.1938      | 0.006232785 | 0.021454413 | 0.008503208 | 0           | 0.012419594 |
|                 | 0.003788732 | 0           | 0.036617716 | 0           | 0           | 0.910983552 |
| TCGA-KB-A93J-01 | 7.7622      | 0.022973012 | 0.028874998 | 0.046310855 | 0           | 0.071820018 |
|                 | 0.008121694 | 0           | 0.006720172 | 0.019926514 | 0           | 0.795252737 |
| TCGA-MX-A5UG-01 | 8.3347      | 0.095276085 | 0.034512021 | 0.055043766 | 0           | 0.047220669 |
|                 | 0.014777752 | 0.085621365 | 0.012816226 | 0.022022349 | 0.000586054 | 0.632123712 |
| TCGA-MX-A5UJ-01 | 7.321       | 0.017024796 | 0.022313814 | 0.024060792 | 0           | 0.022749723 |
|                 | 0.011834099 | 0.003595892 | 0.000766706 | 0.00796595  | 0           | 0.889688229 |
| TCGA-MX-A663-01 | 8.0486      | 0.010139291 | 0.019674627 | 0.024092437 | 0           | 0.042699115 |
|                 | 0.007244719 | 0.031916738 | 0.002650668 | 0.006493471 | 0           | 0.855088934 |
| TCGA-MX-A666-01 | 7.3323      | 0.061389249 | 0.007434801 | 0.029566984 | 0           | 0.035328157 |
|                 | 0.009950193 | 0.011459004 | 0.012165818 | 0.012343789 | 0.001822425 | 0.81853958  |
| TCGA-R5-A7O7-01 | 6.5571      | 0.007583197 | 0.032200492 | 0.005751992 | 0           | 0.008986983 |
|                 | 0.008414154 | 0           | 0.002405041 | 0.014810765 | 0           | 0.919847376 |
| TCGA-R5-A7ZE-01 | 7.1495      | 0.004482722 | 0.011271617 | 0.009508267 | 0           | 0.050127929 |

|                 |             |             |             |             |             |             |             |
|-----------------|-------------|-------------|-------------|-------------|-------------|-------------|-------------|
|                 | 0.005195708 | 0.019424684 | 0.002408085 | 0.003063111 | 0           | 0.894517877 |             |
| TCGA-R5-A7ZF-01 | 5.9603      | 0.005993009 | 0.026006515 | 0           | 0           | 0.046397234 | 0.004176625 |
|                 | 0.012155284 | 0.000476304 | 0.002023223 | 0           | 0.902771806 |             |             |
| TCGA-R5-A7ZI-01 | 6.2676      | 0.01453338  | 0.107398083 | 0.003517543 | 0           | 0           | 0.00223905  |
|                 | 0           | 0.032187713 | 0.02007803  | 0           | 0.820046202 |             |             |
| TCGA-R5-A7ZR-01 | 6.7485      | 0.011216236 | 0.017534631 | 0.013226271 | 0           | 0.058820131 |             |
|                 | 0.004993024 | 0           | 0.003693433 | 0.008858377 | 0           | 0.881657896 |             |
| TCGA-R5-A805-01 | 7.2169      | 0.018493954 | 0.041265292 | 0.019505461 | 0           | 0.075888456 |             |
|                 | 0.00502983  | 0           | 0.003794345 | 0.012168314 | 0           | 0.823854348 |             |
| TCGA-RD-A7BS-01 | 7.263       | 0.03184627  | 0.03315368  | 0.022129384 | 0           | 0.035652325 |             |
|                 | 0.00550874  | 0.026994997 | 0.002823462 | 0.007818457 | 0           | 0.834072685 |             |
| TCGA-RD-A7BT-01 | 5.9215      | 0.006496284 | 0.01701398  | 0.011419957 | 0           | 0.035580775 |             |
|                 | 0.00835468  | 0.007650042 | 0.001583039 | 0.003709905 | 0           | 0.908191339 |             |
| TCGA-RD-A7BW-01 | 8.0747      | 0.014507822 | 0.033821414 | 0.056808859 | 0.022155676 | 0           |             |
|                 | 0.006813814 | 0.01137921  | 0.064203569 | 0.016206499 | 0           | 0.774103136 |             |
| TCGA-RD-A7C1-01 | 6.9184      | 0.006628621 | 0.034070191 | 0.02144034  | 0           | 0.036195452 |             |
|                 | 0.006176017 | 0           | 0.019371083 | 0.011074275 | 0           | 0.865044021 |             |
| TCGA-RD-A8MV-01 | 6.9098      | 0.031824627 | 0.031886605 | 0.022627202 | 0           | 0.052333998 |             |
|                 | 0.006748591 | 0           | 0.015560973 | 0.029912862 | 0           | 0.809105143 |             |
| TCGA-RD-A8MW-01 | 7.0739      | 0.021123602 | 0.065936348 | 0.037794957 | 0           | 0.018873882 |             |
|                 | 0.007551356 | 0           | 0.014506729 | 0.032317834 | 0           | 0.801895292 |             |
| TCGA-RD-A8N0-01 | 6.7939      | 0.079272786 | 0.012659969 | 0.030924479 | 0           | 0.01691694  |             |
|                 | 0.006650818 | 0.036394678 | 0.02634121  | 0.029636845 | 0.001909955 | 0.75929232  |             |
| TCGA-RD-A8N1-01 | 7.5012      | 0.05896293  | 0.043129641 | 0.034760277 | 0           | 0.013640357 |             |
|                 | 0.01530924  | 0.044868872 | 0.022071696 | 0.032817435 | 0           | 0.734439551 |             |
| TCGA-RD-A8N2-01 | 7.6018      | 0.011517462 | 0.00468605  | 0.026797104 | 0.009887965 |             |             |
|                 | 0.007697823 | 0.004763453 | 0.063819543 | 0.004129266 | 0.008827334 | 0.007393264 |             |
|                 | 0.850480737 |             |             |             |             |             |             |
| TCGA-RD-A8N4-01 | 7.8476      | 0.014768515 | 0.004744325 | 0.02367021  | 0.025906817 |             |             |
|                 | 0.012101719 | 0.008358878 | 0.072582228 | 0.008474794 | 0.010915037 | 0           | 0.818477477 |

|                 |             |             |             |             |             |             |
|-----------------|-------------|-------------|-------------|-------------|-------------|-------------|
| TCGA-RD-A8N5-01 | 7.5859      | 0.006741711 | 0.027202949 | 0.018108753 | 0           | 0.074003173 |
|                 | 0.005024448 | 0.010635719 | 0           | 0.008099094 | 0           | 0.850184153 |
| TCGA-RD-A8N6-01 | 7.1799      | 0.014906329 | 0.011624248 | 0.020461289 | 0           | 0.032013759 |
|                 | 0.009272285 | 0.01556059  | 0.003565929 | 0.003340531 | 0.003186082 | 0.886068959 |
| TCGA-RD-A8N9-01 | 7.8825      | 0.023051768 | 0.023717302 | 0.048415612 | 0           | 0.02840679  |
|                 | 0.007492562 | 0           | 0.013369878 | 0.038996969 | 0.001452006 | 0.815097112 |
| TCGA-RD-A8NB-01 | 7.6212      | 0.030606855 | 0.04965714  | 0.035148235 | 0           | 0.032499141 |
|                 | 0.011900221 | 0.000162271 | 0.010824263 | 0.021819305 | 0           | 0.807382568 |
| TCGA-SW-A7EA-01 | 7.2335      | 0.000732446 | 0.096017859 | 0           | 0           | 0.020356122 |
|                 | 0.028312459 | 0.00931698  | 0.005902919 | 0           | 0.838274231 | 0.001086983 |
| TCGA-SW-A7EB-01 | 6.4038      | 0.021623295 | 0.007672547 | 0.022176907 | 0           | 0.052887275 |
|                 | 0.008320973 | 0.021011583 | 0.007813953 | 0.009604498 | 0           | 0.84888897  |
| TCGA-VQ-A8DT-01 | 5.6767      | 0.008529535 | 0.012608931 | 0.019319628 | 0           | 0.027130749 |
|                 | 0.00930388  | 0.007181328 | 0.000795357 | 0.00333395  | 0           | 0.911796643 |
| TCGA-VQ-A8DU-01 | 6.7056      | 0.008479477 | 0.017738725 | 0.008482387 | 0           | 0.024386925 |
|                 | 0.011346314 | 0           | 0.005463703 | 0.009184563 | 0           | 0.914917905 |
| TCGA-VQ-A8DV-01 | 6.686       | 0.007140691 | 0.005365612 | 0.009185955 | 0.001885494 |             |
|                 | 0.015963201 | 0.00440703  | 0           | 0.002404536 | 0.002206149 | 0.951441331 |
| TCGA-VQ-A8DZ-01 | 7.2064      | 0.003661988 | 0.018560789 | 0.019536267 | 0           | 0.055828955 |
|                 | 0.006673027 | 0.012361223 | 0.017441711 | 0.001597076 | 0           | 0.864338964 |
| TCGA-VQ-A8E0-01 | 7.6969      | 0.007973863 | 0.04671581  | 0.019722451 | 0           | 0.023277351 |
|                 | 0.011847152 | 0           | 0           | 0.013029774 | 0           | 0.877433599 |
| TCGA-VQ-A8E2-01 | 7.9539      | 0.007211748 | 0.021675829 | 0.024349294 | 0           | 0.039902013 |
|                 | 0.025054921 | 0           | 0.019634231 | 0.026848019 | 0.006536585 | 0.82878736  |
| TCGA-VQ-A8E3-01 | 7.3803      | 0.015350573 | 0.066500802 | 0.014422615 | 0           | 0.033933649 |
|                 | 0.010755865 | 0.013212985 | 0.014470386 | 0.010835611 | 0           | 0.820517514 |
| TCGA-VQ-A8E7-01 | 7.3119      | 0.005971414 | 0.013892368 | 0.031044611 | 0           | 0.054508246 |
|                 | 0.009936882 | 0.001012438 | 0.000442462 | 0.005122863 | 0           | 0.878068715 |
| TCGA-VQ-A8P2-01 | 6.4846      | 0.000927021 | 0.01758635  | 0.011652681 | 0           | 0.029347103 |
|                 | 0.012560322 | 0.018657014 | 0           | 0.003469345 | 0           | 0.905800164 |

|                 |             |             |             |             |             |             |
|-----------------|-------------|-------------|-------------|-------------|-------------|-------------|
| TCGA-VQ-A8P3-01 | 7.0172      | 0.007028555 | 0.033296048 | 0.003229867 | 0.002625413 |             |
|                 | 0.005358236 | 0.011088483 | 0           | 0.009632707 | 0.006611573 | 0.920289712 |
| TCGA-VQ-A8P5-01 | 7.2644      | 0.011658781 | 0.037803007 | 0.012154523 | 0           | 0.029315811 |
|                 | 0.009006932 | 0           | 0.003327517 | 0.010772209 | 0           | 0.88596122  |
| TCGA-VQ-A8P8-01 | 7.3142      | 0.048436321 | 0.021124723 | 0.0310973   | 0           | 0.032999068 |
|                 | 0.012516377 | 0.011248247 | 0.002655595 | 0.01659675  | 0           | 0.82332562  |
| TCGA-VQ-A8PB-01 | 6.6652      | 0.004270938 | 0.056802239 | 0           | 0           | 0.019948933 |
|                 | 0.018100645 | 0.006464614 | 0.005460225 | 0           |             | 0.877917689 |
| TCGA-VQ-A8PC-01 | 7.6883      | 0.036110989 | 0.010843516 | 0.066716615 | 0           | 0.06121019  |
|                 | 0.011596483 | 0.013804993 | 0.00396394  | 0.018136258 | 0           | 0.777617014 |
| TCGA-VQ-A8PD-01 | 7.7535      | 0.073620846 | 0.021988137 | 0.027162968 | 0           | 0.047661672 |
|                 | 0.013052303 | 0.027523148 | 0.017243768 | 0.028883246 | 0.000468703 | 0.74239521  |
| TCGA-VQ-A8PE-01 | 7.2293      | 0.024469678 | 0.064654124 | 0.016856956 | 0           | 0.05415406  |
|                 | 0.006282602 | 0.01331256  | 0.014896056 | 0.024463104 | 0           | 0.780910861 |
| TCGA-VQ-A8PF-01 | 8.1526      | 0.048498011 | 0.050124924 | 0.055605657 | 0           | 0.06043074  |
|                 | 0.00999227  | 0           | 0.051334366 | 0.033543407 | 0           | 0.690470625 |
| TCGA-VQ-A8PH-01 | 6.762       | 0.011779875 | 0.029162476 | 0.007018295 | 0           | 0.01687506  |
|                 | 0.003415442 | 0.015942802 | 0.016554799 | 0.005013943 | 0           | 0.894237309 |
| TCGA-VQ-A8PJ-01 | 7.2559      | 0.012805526 | 0.014111646 | 0.01873642  | 0           | 0.048006058 |
|                 | 0.00933389  | 0           | 0.009915087 | 0.003568833 | 0           | 0.883522541 |
| TCGA-VQ-A8PK-01 | 7.664       | 0.021757579 | 0.063958341 | 0.03664735  | 0           | 0.02728201  |
|                 | 0.012979596 | 0.003665034 | 0.009683546 | 0.011208941 | 0           | 0.812817603 |
| TCGA-VQ-A8PM-01 | 7.5869      | 0.041272714 | 0.021859476 | 0.023837566 | 0           | 0.04429948  |
|                 | 0.008878151 | 0.001443762 | 0.007152044 | 0.029085398 | 0           | 0.822171408 |
| TCGA-VQ-A8PO-01 | 7.1569      | 0.029490044 | 0.095147971 | 0.003810812 | 0           | 0.018061536 |
|                 | 0.01361158  | 0           | 0.024686419 | 0.028524617 | 0           | 0.786667021 |
| TCGA-VQ-A8PP-01 | 8.5664      | 0.01363853  | 0.042826323 | 0.009669978 | 0           | 0.049116068 |
|                 | 0.0132354   | 0.018487112 | 0.011070381 | 0.020666108 | 0           | 0.8212901   |
| TCGA-VQ-A8PQ-01 | 8.4652      | 0.203881131 | 0.018234173 | 0.048759576 | 0           | 0.020666469 |

|                 |             |             |             |             |             |             |             |   |   |
|-----------------|-------------|-------------|-------------|-------------|-------------|-------------|-------------|---|---|
|                 | 0.004864875 | 0.222372075 | 0.033844754 | 0.036433359 | 0.007276816 | 0.403666772 |             |   |   |
| TCGA-VQ-A8PU-01 | 6.6352      | 0.013609508 | 0.103449593 | 0           | 0           | 0.005493609 | 0.003205175 |   |   |
|                 | 0           | 0           | 0.006232655 | 0           | 0.86800946  |             |             |   |   |
| TCGA-VQ-A8PX-01 | 6.7485      | 0.037791614 | 0.142048256 | 0           | 0           | 0           | 0.009318644 | 0 |   |
|                 | 0.006825594 | 0.055158958 | 0           | 0.748856935 |             |             |             |   |   |
| TCGA-VQ-A91A-01 | 8.2881      | 0.008252149 | 0.068064592 | 0.018813573 | 0           |             | 0.073640516 |   |   |
|                 | 0.007188902 | 0.011469001 | 0           | 0.011618879 | 0           | 0.800952389 |             |   |   |
| TCGA-VQ-A91D-01 | 7.7747      | 0.013556908 | 0.089528729 | 0.008784246 | 0           |             | 0.012166827 |   |   |
|                 | 0.012170307 | 0           | 0           | 0.013128851 | 0           | 0.850664131 |             |   |   |
| TCGA-VQ-A91E-01 | 7.8926      | 0.02667659  | 0.036079018 | 0.011385391 | 0           |             | 0.032551882 |   |   |
|                 | 0.012654478 | 0           | 0.011849752 | 0.018898734 | 0           | 0.849904154 |             |   |   |
| TCGA-VQ-A91K-01 | 7.9841      | 0.022991149 | 0.035162544 | 0.053288381 | 0           |             | 0.044269979 |   |   |
|                 | 0.017540895 | 0           | 0.002662521 | 0.015144172 | 0           | 0.808940359 |             |   |   |
| TCGA-VQ-A91N-01 | 6.5919      | 0.019516794 | 0.008199234 | 0.018575092 | 0           |             | 0.05543547  |   |   |
|                 | 0.006310755 | 0           | 0.002946471 | 0.015109086 | 0.001410817 | 0.872496281 |             |   |   |
| TCGA-VQ-A91Q-01 | 7.8686      | 0.018189338 | 0.050954154 | 0.024511091 | 0           |             | 0.024714304 |   |   |
|                 | 0.012970465 | 0           | 0           | 0.017357893 | 0.001096792 | 0.850205963 |             |   |   |
| TCGA-VQ-A91S-01 | 7.2065      | 0.015898672 | 0.035958596 | 0.030944772 | 0           |             | 0.054057577 |   |   |
|                 | 0.008134245 | 0           | 0.035939777 | 0.007860552 | 0           | 0.811205809 |             |   |   |
| TCGA-VQ-A91U-01 | 6.8066      | 0.016725125 | 0.024787385 | 0.029911297 | 0           |             | 0.028718717 |   |   |
|                 | 0.012143423 | 0           | 0.015262824 | 0.026336604 | 0           | 0.846114625 |             |   |   |
| TCGA-VQ-A91V-01 | 7.0166      | 0.012445756 | 0.012372082 | 0.017548613 | 0           |             | 0.036882484 |   |   |
|                 | 0.007741164 | 0.000665409 | 0           | 0.005689353 | 0           | 0.906655139 |             |   |   |
| TCGA-VQ-A91W-01 | 7.6808      | 0.005254718 | 0.30001158  | 0           | 0           | 0           | 0.003050607 | 0 | 0 |
|                 | 0.016066158 | 0           | 0.675616937 |             |             |             |             |   |   |
| TCGA-VQ-A91X-01 | 5.444       | 0.005388204 | 0.013844679 | 0.007684759 | 0           |             | 0.031268053 |   |   |
|                 | 0.010826477 | 0.005000983 | 0           | 0.000543063 | 0           | 0.925443782 |             |   |   |
| TCGA-VQ-A91Y-01 | 7.9393      | 0.03028595  | 0.036382981 | 0.039934874 | 0           |             | 0.021233966 |   |   |
|                 | 0.011141292 | 0.012883373 | 0.0125427   | 0.027355447 | 0.010926525 | 0.797312892 |             |   |   |
| TCGA-VQ-A91Z-01 | 8.4395      | 0.003420225 | 0.011661377 | 0.021353139 | 0           |             | 0.026547304 |   |   |
|                 | 0.008139102 | 0.018250348 | 0.008103175 | 0.010204139 | 0.001426034 | 0.890895157 |             |   |   |

|                 |             |             |             |             |             |             |
|-----------------|-------------|-------------|-------------|-------------|-------------|-------------|
| TCGA-VQ-A922-01 | 7.9994      | 0.01732935  | 0.028813455 | 0.030092624 | 0           | 0.030965968 |
|                 | 0.015426542 | 0           | 0.002155748 | 0.015691449 | 0.010226913 | 0.849297952 |
| TCGA-VQ-A923-01 | 7.6172      | 0.053210517 | 0.045449519 | 0.024240918 | 0           | 0.047070843 |
|                 | 0.012803294 | 0           | 0.050732272 | 0.029513169 | 0           | 0.736979468 |
| TCGA-VQ-A924-01 | 7.3046      | 0.008450534 | 0.067345886 | 0.023360551 | 0           | 0.034764774 |
|                 | 0.010578197 | 0           | 0.013484294 | 0.01831851  | 0           | 0.823697254 |
| TCGA-VQ-A925-01 | 6.5679      | 0.010457762 | 0.01346057  | 0.010079939 | 0           | 0.041986699 |
|                 | 0.008791687 | 0.004709856 | 0.00379755  | 0.005877729 | 0.000204557 | 0.90063365  |
| TCGA-VQ-A927-01 | 6.9285      | 0.021088048 | 0.012966302 | 0.030427373 | 0           | 0.040968398 |
|                 | 0.008678437 | 0           | 0.000990574 | 0.019362246 | 0           | 0.865518624 |
| TCGA-VQ-A928-01 | 8.1014      | 0.012247339 | 0.076249171 | 0.027745615 | 0           | 0           |
|                 | 0           | 0           | 0.016381572 | 0           | 0.854823643 | 0.01255266  |
| TCGA-VQ-A92D-01 | 7.6047      | 0.012971082 | 0.036704315 | 0.007459034 | 0           | 0.04975223  |
|                 | 0.008953849 | 0           | 0           | 0.005710753 | 0           | 0.878448736 |
| TCGA-VQ-A94O-01 | 7.3022      | 0.008093735 | 0.059833028 | 0.00140348  | 0           | 0.034144798 |
|                 | 0.018614646 | 0.018656454 | 0           | 0.011856822 | 0           | 0.847397036 |
| TCGA-VQ-A94P-01 | 8.1984      | 0.013714398 | 0.022094543 | 0.036739827 | 0.009611101 |             |
|                 | 0.018939072 | 0.007890277 | 0.05475769  | 0.008058741 | 0.011493382 | 0.005027557 |
|                 | 0.811673411 |             |             |             |             |             |
| TCGA-VQ-A94R-01 | 7.0225      | 0.012826965 | 0.016210196 | 0.04011735  | 0           | 0.024590582 |
|                 | 0.015452481 | 0           | 0.007939769 | 0.017335548 | 0           | 0.865527109 |
| TCGA-VQ-A94T-01 | 6.7897      | 0.004944119 | 0.018142071 | 0.005356632 | 0           | 0.024401473 |
|                 | 0.00501658  | 0.014313241 | 0           | 0.003718806 | 0           | 0.924107078 |
| TCGA-VQ-A94U-01 | 7.1932      | 0.012343808 | 0.020292051 | 0.025718292 | 0           | 0.025231994 |
|                 | 0.00777585  | 0.010712237 | 0           | 0.021043331 | 0           | 0.876882437 |
| TCGA-VQ-AA64-01 | 7.8022      | 0.015673579 | 0.020388624 | 0.023071893 | 0           | 0.02228679  |
|                 | 0.017085434 | 0           | 0.000978614 | 0.009907609 | 0.006237768 | 0.88436969  |
| TCGA-VQ-AA68-01 | 8.012       | 0.017422272 | 0.03123601  | 0.012193575 | 0           | 0.04008952  |
|                 | 0.005722543 | 0.022557628 | 0.009721277 | 0.012444168 | 0           | 0.848613008 |
| TCGA-VQ-AA69-01 | 8.1768      | 0.0098173   | 0.033481321 | 0.029271255 | 0           | 0.025282131 |
|                 | 0.01230827  | 0           | 0           | 0.140833724 | 0.00347909  | 0.745526909 |

TCGA-VQ-AA6A-01 7.1633 0.020605239 0.042736342 0.003337681 0 0.036941512  
0.010331724 0 0 0.004371953 0 0.881675548

TCGA-VQ-AA6B-01 6.4209 0.007406393 0.007653757 0.016497958 0 0.025689497  
0.00967982 0.011824746 0 0.002315458 0.001866971 0.9170654

TCGA-VQ-AA6D-01 6.9965 0.004744995 0.219827256 0 0 0 0.005547902  
0.02650232 0.011162795 0.009927359 0 0.722287373

TCGA-VQ-AA6F-01 7.1031 0.040412354 0.048319611 0.004831559 0 0.064256532  
0.007067126 0 0.005265627 0.012664509 0 0.817182681

TCGA-VQ-AA6G-01 7.7875 0.012818769 0.05433032 0.005957255 0 0.086633521  
0.009023554 0.012718972 0 0.01306903 0 0.805448579

TCGA-VQ-AA6I-01 7.2062 0.011587247 0.018726151 0.030194825 0 0.025253201  
0.009665542 0 0.006046696 0.015815886 0 0.882710452

TCGA-VQ-AA6J-01 7.7768 0.035194009 0.043795684 0.036877455 0 0.037633846  
0.014973997 0.020008586 0.00952277 0.01924735 0 0.782746304

TCGA-VQ-AA6K-01 7.2998 0.014147828 0.017496923 0.022471862 0 0.028832313  
0.010235634 0.010329354 0.012035157 0.012489615 0 0.871961314

TCGA-ZA-A8F6-01 7.4478 0.014150173 0.02013477 0.054135186 0 0.033632604  
0.012745847 0.02899286 0.001729923 0.004988734 0.002984945 0.826504958

TCGA-ZQ-A9CR-01 7.5207 0.008961242 0.105776204 0 0 0.007877727 0.00553392  
0 0.010298813 0.016438096 0 0.845113998

Table-S6(KEGG):

| ID       | Description                                                                                                                                                                                                                                        | GeneRatio | BgRatio  | pvalue      | p.adjust    | qvalue     | geneID | Count |
|----------|----------------------------------------------------------------------------------------------------------------------------------------------------------------------------------------------------------------------------------------------------|-----------|----------|-------------|-------------|------------|--------|-------|
| hsa04974 | Protein digestion and absorption                                                                                                                                                                                                                   | 25/511    | 103/8105 | 3.02E-09    | 0.000000485 |            |        |       |
|          | 0.000000376                                                                                                                                                                                                                                        |           |          |             |             |            |        |       |
|          | 477/480/1300/1301/7373/1306/1310/1277/1278/84570/1281/1285/1286/1289/1291/1292/1293/1295/1296/2006/6546/1358/4224/5644/5646                                                                                                                        |           |          | 25          |             |            |        |       |
| hsa05150 | Staphylococcus aureus infection                                                                                                                                                                                                                    | 24/511    | 96/8105  | 3.32E-09    | 0.000000485 |            |        |       |
|          | 0.000000376                                                                                                                                                                                                                                        |           |          |             |             |            |        |       |
|          | 712/713/714/715/716/2213/2214/2359/3111/3113/3115/3117/3118/3689/6403/1667/1672/1673/1828/2266/3859/3860/3866/54474                                                                                                                                |           |          | 24          |             |            |        |       |
| hsa04080 | Neuroactive ligand-receptor interaction                                                                                                                                                                                                            | 49/511    | 341/8105 | 3.35E-08    | 0.00000268  |            |        |       |
|          | 0.00000208                                                                                                                                                                                                                                         |           |          |             |             |            |        |       |
|          | 116/117/155/185/186/886/1129/1136/8973/1268/1511/1909/2359/2558/2690/9340/2890/2899/2901/2922/2925/3061/3356/3363/2862/4852/4886/4889/22953/27334/5179/5729/5733/5737/1903/6863/255061/6869/6865/7432/7434/2147/2557/3358/3814/8620/5024/5644/5646 |           |          | 49          |             |            |        |       |
| hsa04514 | Cell adhesion molecules                                                                                                                                                                                                                            | 29/511    | 149/8105 | 3.67E-08    | 0.00000268  | 0.00000208 |        |       |
|          | 57863/933/1000/1272/3111/3113/3115/3117/3118/152404/3689/83700/57689/4099/4684/4685/23114/22871/9379/9369/22854/5175/5788/9672/6403/6614/7412/1462/9080                                                                                            |           |          | 29          |             |            |        |       |
| hsa04512 | ECM-receptor interaction                                                                                                                                                                                                                           | 21/511    | 88/8105  | 7.74E-08    | 0.00000452  | 0.0000035  |        |       |
|          | 1277/1278/1285/1286/1291/1292/1293/1311/2335/2814/22801/3908/5649/9899/7057/7058/7060/3371/63923/7143/7148                                                                                                                                         |           |          | 21          |             |            |        |       |
| hsa04610 | Complement and coagulation cascades                                                                                                                                                                                                                | 20/511    | 85/8105  | 0.000000203 | 0.00000988  |            |        |       |
|          | 0.00000766                                                                                                                                                                                                                                         |           |          |             |             |            |        |       |
|          | 2/712/713/714/715/716/730/3078/1378/1380/2162/3689/5054/710/11326/725/2147/2243/2244/2266                                                                                                                                                          |           |          | 20          |             |            |        |       |
| hsa05144 | Malaria                                                                                                                                                                                                                                            | 14/511    | 50/8105  | 0.00000149  | 0.0000623   | 0.0000483  |        |       |
|          | 2532/1311/1378/2995/3689/100528032/5175/6403/7043/7057/7058/7060/54106/7412                                                                                                                                                                        |           |          | 14          |             |            |        |       |
| hsa04020 | Calcium signaling pathway                                                                                                                                                                                                                          | 34/511    | 240/8105 | 0.00000634  | 0.000231347 |            |        |       |
|          | 0.000179307                                                                                                                                                                                                                                        |           |          |             |             |            |        |       |
|          | 108/155/185/491/8913/815/844/845/886/1129/1909/2255/2247/2250/2252/2260/2925/3356/3363/4638/4803/4915/22953/5159/5350/5579/5733/5737/6546/6869/6865/8074/3358/5024                                                                                 |           |          | 34          |             |            |        |       |
| hsa00982 | Drug metabolism - cytochrome P450                                                                                                                                                                                                                  | 16/511    | 72/8105  | 0.00000075  | 0.000243288 |            |        |       |
|          | 0.000188561                                                                                                                                                                                                                                        |           |          |             |             |            |        |       |
|          | 125/316/2326/2327/131/1555/1557/1576/2938/2939/2940/54658/54659/54577/54576/54600                                                                                                                                                                  |           |          | 16          |             |            |        |       |
| hsa04975 | Fat digestion and absorption                                                                                                                                                                                                                       | 12/511    | 43/8105  | 0.00000877  | 0.000251966 |            |        |       |
|          | 0.000195288                                                                                                                                                                                                                                        |           |          |             |             |            |        |       |
|          | 26279/335/337/1056/1208/2168/2169/80168/346606/4547/84647/64600                                                                                                                                                                                    |           |          | 12          |             |            |        |       |
| hsa04151 | PI3K-Akt signaling pathway                                                                                                                                                                                                                         | 44/511    | 354/8105 | 0.00000949  | 0.000251966 |            |        |       |
|          | 0.000195288                                                                                                                                                                                                                                        |           |          |             |             |            |        |       |
|          | 10000/51378/1129/1277/1278/1285/1286/1291/1292/1293/1311/1436/2255/2247/2250/                                                                                                                                                                      |           |          |             |             |            |        |       |

2252/2260/2322/2335/2690/59345/3479/22801/3908/4803/4804/4915/5159/5649/8115/7057  
 /7058/7060/3371/63923/7143/7148/84699/1943/2056/8074/2538/2792/5105 44  
 hsa05204Chemical carcinogenesis 17/511 83/8105 0.0000125 0.00030403 0.00023564  
 125/1545/3290/131/1557/1576/64816/2938/2939/2940/10/6822/54658/54659/54577/54  
 576/54600 17  
 hsa04060Cytokine-cytokine receptor interaction 37/511 295/81050.0000407 0.000914448  
 0.000708746  
 6357/6358/6363/6366/729230/1233/1236/1237/1436/6387/10563/4283/2662/8200/3922  
 55/2690/3587/3593/59067/133396/4803/4804/7043/23495/944/2829/655/6359/6364/284340  
 /2056/3605/112744/50616/56300/26525/2717837  
 hsa00590Arachidonic acid metabolism 13/511 61/8105 0.0000852 0.001693669  
 0.001312685  
 2687/26279/5730/5740/1555/1557/1573/8529/11283/84647/64600/123745/255189 13  
 hsa00980Metabolism of xenobiotics by cytochrome P450 15/511 78/8105 0.000087  
 0.001693669 0.001312685  
 125/1545/3290/131/1555/1576/2938/2939/2940/6822/54658/54659/54577/54576/54600  
 15  
 hsa04510Focal adhesion 27/511 201/81050.000143993 0.002575681 0.001996292  
 10000/1277/1278/1285/1286/1291/1292/1293/1311/2316/2318/2335/3479/22801/3908/  
 10398/4638/5159/5579/5649/7057/7058/7060/3371/63923/7143/7148 27  
 hsa04061Viral protein interaction with cytokine and cytokine receptor 17/511 100/8105  
 0.000149954 0.002575681 0.001996292  
 6357/6358/6363/6366/729230/1233/1236/1237/1436/6387/10563/4283/3587/2829/6359  
 /6364/27178 17  
 hsa04972Pancreatic secretion 17/511 102/81050.000192386 0.003120933 0.002418892  
 108/111/477/480/491/886/3778/26279/5579/1056/22802/1358/84647/64600/5644/5646  
 /1811 17  
 hsa04270Vascular smooth muscle contraction 20/511 133/81050.000231015 0.003550331  
 0.002751699  
 59/72/108/111/185/800/1909/3778/3779/10335/4629/10398/4638/4880/26279/5579/84  
 647/64600/123745/255189 20  
 hsa00591Linoleic acid metabolism8/511 29/8105 0.000311253 0.004544295 0.003522075  
 26279/1557/1573/1576/84647/64600/123745/255189 8  
 hsa04640Hematopoietic cell lineage 16/511 99/8105 0.000422501 0.005874781  
 0.004553273  
 911/933/951/1378/1380/1436/2208/2322/2814/3111/3113/3115/3117/3118/931/2056  
 16  
 hsa03320PPAR signaling pathway 13/511 76/8105 0.000831442 0.011035502 0.008553111  
 9370/2167/729359/6258/10580/335/336/116519/345/2168/2169/2172/5105 13  
 hsa04024cAMP signaling pathway 26/511 216/81050.001054117 0.013382705 0.01037232  
 108/111/116/117/10000/477/480/491/815/1129/1261/1909/2737/2890/10398/4852/488  
 6/5139/5350/5733/56670/7432/7434/54714/84699/84152 26  
 hsa00140Steroid hormone biosynthesis 11/511 61/8105 0.001316697 0.015131659  
 0.011727854 1545/9420/3290/1109/1576/3283/54658/54659/54577/54576/54600 11

hsa04145Phagosome 20/511 152/81050.001326659 0.015131659 0.011727854  
 715/81035/1311/1536/2213/2214/3111/3113/3115/3117/3118/3689/4353/4360/9902/70  
 57/7058/7060/7846/245973 20  
 hsa00983Drug metabolism - other enzymes 13/511 80/8105 0.001361915 0.015131659  
 0.011727854  
 1807/4353/1576/2938/2939/2940/10/54658/54659/54577/54576/54600/7498 13  
 hsa04933AGE-RAGE signaling pathway in diabetic complications15/511 100/81050.00139916  
 0.015131659 0.011727854  
 185/10000/1277/1278/1281/1285/1286/1536/2335/4313/5579/5054/7043/7412/27035  
 15  
 hsa05321Inflammatory bowel disease 11/511 65/8105 0.002243934 0.023401022  
 0.018137057 3111/3113/3115/3117/3118/3593/59067/7043/3605/112744/50616 11  
 hsa05205Proteoglycans in cancer 24/511 205/81050.00236207 0.023783605 0.01843358  
 10000/287/815/1277/1278/1634/2247/2260/2316/2318/2335/3316/3479/3593/4060/431  
 3/22808/5579/7057/7078/117581/7483/7484/3549 24  
 hsa04614Renin-angiotensin system 6/511 23/8105 0.002445514 0.023803002  
 0.018448614 185/186/1215/1511/116512/5972 6  
 hsa05414Dilated cardiomyopathy 14/511 96/8105 0.002616931 0.024649802 0.019104929  
 108/111/59284/1674/3479/22801/3908/4634/5350/6444/6445/6546/7043/7169 14  
 hsa04014Ras signaling pathway 26/511 232/81050.002930723 0.026188509 0.02029751  
 10000/51378/1436/2255/2247/2250/2252/2260/2322/59345/3363/3479/22808/4803/480  
 4/4915/5159/26279/5579/1943/8074/2792/84647/64600/123745/255189 26  
 hsa05140Leishmaniasis 12/511 77/8105 0.00295966 0.026188509 0.02029751  
 1378/1536/2214/3111/3113/3115/3117/3118/3593/3689/5579/7043 12  
 hsa00430Taurine and hypotaurine metabolism 4/511 11/8105 0.003608038 0.030986679  
 0.024016352 1036/339896/2687/124975 4  
 hsa05146Amoebiasis 14/511 102/81050.004599799 0.038162198 0.029577767  
 911/1277/1278/1281/1285/1286/1511/2335/3593/3689/3908/5579/7043/5275 14  
 hsa04725Cholinergic synapse15/511 113/81050.004704929 0.038162198 0.029577767  
 108/111/10000/815/1103/1129/1136/8973/2775/59345/56479/5579/6572/84699/2792  
 15  
 hsa04726Serotonergic synapse 15/511 115/81050.005550249 0.043801962 0.033948889  
 111/2775/59345/3356/3359/3363/3762/5579/1557/1573/1644/2792/3358/123745/25518  
 9 15  
 hsa00350Tyrosine metabolism 7/511 36/8105 0.006401599 0.049191231 0.038125864  
 125/8639/316/7173/131/1644/5409 7

| ID         | term | Description                                                                                                                                                                                                                                                                                                                                                                                                                                                                                                                                                  | GeneRatio   | BgRatio   | pvalue  | p.adjust  | qvalue   | geneID   | Count    |
|------------|------|--------------------------------------------------------------------------------------------------------------------------------------------------------------------------------------------------------------------------------------------------------------------------------------------------------------------------------------------------------------------------------------------------------------------------------------------------------------------------------------------------------------------------------------------------------------|-------------|-----------|---------|-----------|----------|----------|----------|
| GO:0043062 | BP   | extracellular structure organization                                                                                                                                                                                                                                                                                                                                                                                                                                                                                                                         |             |           | 91/1105 | 410/16241 | 1.62E-24 |          |          |
|            |      |                                                                                                                                                                                                                                                                                                                                                                                                                                                                                                                                                              | 7.97E-21    | 6.39E-21  |         |           |          |          |          |
|            |      | A2M/ABI3BP/ADAMTS2/AEBP1/AGTR1/ANTXR1/APOE/BGN/CCDC80/CMA1/COL10A1/COL11A1/COL14A1/COL15A1/COL19A1/COL1A1/COL1A2/COL25A1/COL3A1/COL4A3/COL4A4/COL5A1/COL6A1/COL6A2/COL6A3/COL8A1/COL8A2/COMP/CRISPLD2/CTSG/CYP1B1/DCN/DDR2/DPT/EFEMP2/ELANE/ELN/EMILIN1/FBLN1/FBLN2/FBLN5/FBN1/FGF2/FLRT2/FN1/GPIHBP1/GREM1/HAS1/ITGA11/ITGAD/ITGB2/JAM3/LAMA2/LUM/MFAP4/MFAP5/MMP2/MPO/MYH11/PECAM1/SERPINE1/SFRP2/SMOC2/SPARC/SULF1/THBS1/TIMP2/TNC/TNR/TNXB/VCAM1/VCAN/VIT/ADTRP/APOA1/APOA2/APOA4/APOA5/APOC3/BMP7/FGA/FGB/FGG/HAPLN1/IHH/MMP3/MTTP/NOX1/NR2E1/PRSS1/TTR | 91          |           |         |           |          |          |          |
| GO:0030198 | BP   | extracellular matrix organization                                                                                                                                                                                                                                                                                                                                                                                                                                                                                                                            |             |           | 80/1105 | 357/16241 | 6.13E-22 |          |          |
|            |      |                                                                                                                                                                                                                                                                                                                                                                                                                                                                                                                                                              | 1.51E-18    | 1.21E-18  |         |           |          |          |          |
|            |      | A2M/ABI3BP/ADAMTS2/AEBP1/ANTXR1/BGN/CCDC80/CMA1/COL10A1/COL11A1/COL14A1/COL15A1/COL19A1/COL1A1/COL1A2/COL25A1/COL3A1/COL4A3/COL4A4/COL5A1/COL6A1/COL6A2/COL6A3/COL8A1/COL8A2/COMP/CRISPLD2/CTSG/CYP1B1/DCN/DDR2/DPT/EFEMP2/ELANE/ELN/EMILIN1/FBLN1/FBLN2/FBLN5/FBN1/FGF2/FLRT2/FN1/GREM1/HAS1/ITGA11/ITGAD/ITGB2/JAM3/LAMA2/LUM/MFAP4/MFAP5/MMP2/MYH11/PECAM1/SERPINE1/SFRP2/SMOC2/SPARC/SULF1/THBS1/TIMP2/TNC/TNR/TNXB/VCAM1/VCAN/VIT/ADTRP/FGA/FGB/FGG/HAPLN1/IHH/MM                                                                                       | 80          |           |         |           |          |          |          |
| GO:0002526 | BP   | acute inflammatory response                                                                                                                                                                                                                                                                                                                                                                                                                                                                                                                                  |             |           | 39/1105 | 154/16241 | 4.01E-13 | 6.57E-10 |          |
|            |      |                                                                                                                                                                                                                                                                                                                                                                                                                                                                                                                                                              | 5.26E-10    |           |         |           |          |          |          |
|            |      | A2M/ADCYAP1/C1QA/C1QB/C1QC/C1R/C1S/C7/CCR7/CFHR1/CNR1/CR1/CR2/ELANE/FCGR2B/FN1/NPY5R/PTGER3/SERPINA3/SERPING1/TAC1/VCAM1/VSIG4/APOA2/C4BPB/CPN1/CREB3L3/EPO/F2/IL22/NPFF/ORM1/ORM2/REG3A/REG3G/SAA2/SAA4/TFR2/UGT1A1                                                                                                                                                                                                                                                                                                                                         | 39          |           |         |           |          |          |          |
| GO:0006959 | BP   | humoral immune response                                                                                                                                                                                                                                                                                                                                                                                                                                                                                                                                      |             |           | 50/1105 | 241/16241 | 8.54E-13 | 1.05E-09 |          |
|            |      |                                                                                                                                                                                                                                                                                                                                                                                                                                                                                                                                                              | 8.4E-10     |           |         |           |          |          |          |
|            |      | A2M/BPI/C1QA/C1QB/C1QC/C1R/C1S/C7/CCL13/CCR2/CCR7/CFHR1/CR1/CR2/CTSG/CXCL13/CXCL9/ELANE/FCER2/FCGR2B/FCN1/KRT1/MS4A1/PTPRC/SERPING1/VSIG4/BPIFA2/C4BPB/CPN1/DEFA1/DEFB1/DEFB126/DEFB4A/DMBT1/F2/FGA/FGB/HRG/IL36RN/LCN2/PGLYRP3/PGLYRP4/PI3/PRSS3/REG1A/REG1B/REG3A/REG3G/S100A7/SEMG1                                                                                                                                                                                                                                                                       | 50          |           |         |           |          |          |          |
| GO:0098742 | BP   | cell-cell adhesion via plasma-membrane adhesion molecules                                                                                                                                                                                                                                                                                                                                                                                                                                                                                                    |             |           | 52/1105 | 266/16241 | 3.36E-12 | 3.3E-09  | 2.65E-09 |
|            |      | ADIPOQ/CADM3/CBLN1/CDH10/CDH11/CDH19/CDH2/DSCAML1/FAT3/HMCN1/IGSF11/ITGB2/KIRREL3/LRFN5/LRRC4C/MAG/NLGN1/NTNG1/PALLD/PCDH10/PCDH11Y/PCDH7/PCDH9/PCDHA10/PCDHA12/PCDHA13/PCDHA3/PCDHA4/PCDHAC1/PCDHAC2/PCDHGA12/PCDHGA3/PCDHGB6/PCDHGB7/PECAM1/PTPRS/SCARF2/SELP/SLITRK2/SLITRK3/SPARCL1/TENM3/TENM4/VCAM1/APOA1/CDH16/CDH17/CLDN9/DSG1/DSG4/LGALS7B/REG3A                                                                                                                                                                                                    | 52          |           |         |           |          |          |          |
| GO:0019730 | BP   | antimicrobial humoral response                                                                                                                                                                                                                                                                                                                                                                                                                                                                                                                               |             |           | 28/1105 | 108/16241 | 4.58E-10 |          |          |
|            |      |                                                                                                                                                                                                                                                                                                                                                                                                                                                                                                                                                              | 0.000000375 | 0.0000003 |         |           |          |          |          |
|            |      | BPI/CCL13/CTSG/CXCL13/CXCL9/ELANE/BPIFA2/DEFA1/DEFB1/DEFB126/DEFB4A/DMBT1/F2/FGA/FGB/HRG/IL36RN/LCN2/PGLYRP3/PGLYRP4/PI3/PRSS3/REG1A/REG1B/REG3A/REG3G/S100A7/SEMG1                                                                                                                                                                                                                                                                                                                                                                                          | 28          |           |         |           |          |          |          |

GO:0006936 BP muscle contraction 55/1105 342/16241 1.89E-09 0.00000132  
0.00000106  
ACTA2/ACTG2/ACTN2/ANK2/ANXA6/ATP1A2/CACNA1G/CALD1/CASQ1/CASQ2/CHRM2/CHRNA3/CNN1/COMP/CRYAB/CTNNA3/DES/EDNRA/FLNA/GNAO1/HSPB6/HTR2A/HTR7/KCNA1/KCNA5/KCNE4/KCNJ5/KCNMA1/LMOD1/MYH11/MYL3/MYL9/MYLK/MYOCN/P2RX2/PLN/PTGER3/SCN2B/SCN7A/SGCD/SLC8A1/SMPX/SORBS1/SPX/STAC/SULF1/SYNN/TACR1/TACR2/TIFAB/TNNT3/TPM2/VIM/MYH4/P2RX3 55

GO:0003012 BP muscle system process 63/1105 425/16241 3.56E-09 0.00000218  
0.00000175  
ACTA2/ACTG2/ACTN2/AGTR2/ANK2/ANXA6/ATP1A2/CACNA1G/CALD1/CASQ1/CASQ2/CHRM2/CHRNA3/CNN1/COMP/CRYAB/CTNNA3/DES/EDNRA/FLNA/GNAO1/HAND2/HSPB6/HTR2A/HTR7/IGF1/IGFBP5/KCNA1/KCNA5/KCNE4/KCNJ5/KCNMA1/LMOD1/MYH11/MYL3/MYL9/MYLK/MYOCN/MYOCN2/P2RX2/PI16/PLN/PTGER3/RGS4/SCN2B/SCN7A/SGCD/SLC8A1/SMPX/SORBS1/SPX/STAC/SULF1/SYNN/TACR1/TACR2/TIFAB/TNNT3/TPM2/VIM/MYH4/P2RX3 63

GO:0072376 BP protein activation cascade 24/1105 93/16241 8.79E-09 0.0000048  
0.00000385  
A2M/C1QA/C1QB/C1QC/C1R/C1S/C7/CFHR1/CR1/CR2/F13A1/FBLN1/FCN1/GP5/KRT1/SERPING1/VSIG4/APOH/C4BPB/CPN1/F2/FGA/FGB/FGG 24

GO:0051216 BP cartilage development 37/1105 197/16241 1.39E-08 0.00000684  
0.00000548  
ANXA6/CHRD2/COL11A1/COL14A1/COL1A1/COL6A1/COL6A2/COL6A3/COMP/EFEMP1/EVC2/FGF2/FGFR1/FRZB/GDF5/GDF6/GLI2/GLI3/GREM1/HAND2/LUM/MGP/MUSTN1/NKX3-2/NPPC/PRRX1/ROR2/RSPO2/SFRP2/SIX2/SULF1/VIT/WNT9A/BMP7/HOXA11/IHH/IL17F 37

GO:0030199 BP collagen fibril organization 17/1105 51/16241 2.05E-08 0.00000917  
0.00000735  
ADAMTS2/AEBP1/COL11A1/COL14A1/COL1A1/COL1A2/COL3A1/COL5A1/COMP/CYP1B1/DDR2/DPT/EMILIN1/GREM1/LUM/SFRP2/TNXB 17

GO:0002920 BP regulation of humoral immune response 20/1105 70/16241 2.34E-08  
0.00000957 0.00000767  
A2M/C1QA/C1QB/C1QC/C1R/C1S/C7/CCR7/CFHR1/CR1/CR2/CXCL13/FCER2/FCGR2B/PTPRC/SERPING1/VSIG4/C4BPB/CPN1/F2 20

GO:0002673 BP regulation of acute inflammatory response 23/1105 93/16241 4.26E-08  
0.0000156 0.0000125  
A2M/ADCYAP1/C1QA/C1QB/C1QC/C1R/C1S/C7/CCR7/CFHR1/CNR1/CR1/CR2/FCGR2B/NPY5R/PTGER3/SERPING1/TAC1/VSIG4/C4BPB/CPN1/CREB3L3/F2 23

GO:0007156 BP homophilic cell adhesion via plasma membrane adhesion molecules 32/1105  
163/16241 4.45E-08 0.0000156 0.0000125  
CADM3/CDH10/CDH11/CDH19/CDH2/DSCAM1/FAT3/HMCN1/IGSF11/KIRREL3/PALLD/PCDH10/PCDH11Y/PCDH7/PCDH9/PCDHA10/PCDHA12/PCDHA13/PCDHA3/PCDHA4/PCDHAC1/PCDHAC2/PCDHGA12/PCDHGA3/PCDHGB6/PCDHGB7/PECAM1/TENM3/CDH16/CDH17/DSG1/DSG4 32

GO:0055074 BP calcium ion homeostasis 63/1105 455/16241 4.99E-08 0.0000163  
0.0000131  
ADCY5/ADCYAP1/ADCYAP1R1/AGTR1/ANK2/ANXA6/APOE/ATP1A2/ATP2B2/CASQ1/CASQ2/C

CL13/CCL14/CCL19/CCL21/CCR2/CCR4/CCR7/CCR8/CMKLR1/CNR1/CXCL12/CXCL13/CXCL9/EDNR  
A/ELANE/FGF2/FPR3/GPR174/GRIA1/HCTR1/HTR2A/JPH2/JPH4/KCNA5/KCNK3/MS4A1/P2RX2/  
P2RY10/PLN/PRKCB/PTGDR/PTGER3/PTGFR/PTPRC/S1PR3/SGCD/SLC8A1/TAC1/TAC4/TACR1/THY  
1/XCR1/ATP2C2/CCL15/EPO/F2/HTR2C/KISS1/NPFF/P2RX3/REG1A/S100A14 63

GO:0042391 BP regulation of membrane potential 58/1105 411/16241 8.78E-08

0.000027 0.0000216

ABCB5/ACTN2/ADCYAP1/ANK2/ATP1A2/ATP1A4/BVES/CACNA1G/CASQ2/CBLN1/CHRNA3/C  
HRNA6/CNR1/CTNNA3/DCN/FGF14/FHL1/FLNA/GABRA5/GPR88/GRIA1/GRIK3/GRIK5/HTR3A/IG  
SF11/KCNA1/KCNA2/KCNA5/KCNB1/KCNE4/KCNJ5/KCNK2/KCNK3/KCNK4/KCNMA1/MYOC/NALC  
N/NETO1/NLGN1/NTRK2/P2RX2/PLN/POPDC2/RELN/RGS4/SCN11A/SCN2B/SCN7A/SHANK1/SLC  
8A1/TAC1/TCL1A/GABRA4/KCNK10/NPFF/P2RX3/SLC26A3/ZACN 58

GO:0051480 BP regulation of cytosolic calcium ion concentration 51/1105 345/16241

0.000000122 0.0000351 0.0000282

ADCY5/ADCYAP1/ADCYAP1R1/AGTR1/ANK2/ATP1A2/ATP2B2/CASQ1/CASQ2/CCL19/CCL21/C  
CR2/CCR4/CCR7/CCR8/CMKLR1/CNR1/CXCL13/CXCL9/EDNR/FGF2/FPR3/GPR174/GRIA1/HCTR  
1/HTR2A/JPH2/JPH4/KCNA5/KCNK3/MS4A1/P2RX2/P2RY10/PLN/PTGDR/PTGER3/PTGFR/PTPRC/  
S1PR3/SLC8A1/TAC1/TAC4/TACR1/THY1/XCR1/EPO/F2/HTR2C/KISS1/NPFF/P2RX3 51

GO:0001501 BP skeletal system development 66/1105 498/16241 0.000000129

0.0000351 0.0000282

ANXA6/CDH11/CHRD2/CMKLR1/COL10A1/COL11A1/COL14A1/COL19A1/COL1A1/COL1A2/  
COL3A1/COL6A1/COL6A2/COL6A3/COMP/DSCAML1/EFEMP1/EN1/EVC/EXTL1/FBN1/FGF2/FGFR  
1/FRZB/GDF10/GDF5/GDF6/GLI2/GLI3/GREM1/HAND2/IGF1/LUM/MGP/MMP2/MUSTN1/MYOC  
/NKX3-2/NPPC/NPR3/PRELP/PRRX1/PTPRC/RANBP3L/RIPPLY2/ROR2/RSPO2/SFRP1/SFRP2/SFRP4  
/SIX2/SPARC/SULF1/TGFB3/TIFAB/TMEM119/VCAN/VIT/WNT9A/WNT9B/BMP7/CDX1/HAPLN1/H  
OXA11/IHH/IL17F 66

GO:0061844 BP antimicrobial humoral immune response mediated by antimicrobial peptide

18/1105 64/16241 0.000000153 0.0000395 0.0000316

CCL13/CXCL13/CXCL9/ELANE/DEFA1/DEFB1/DEFB126/DEFB4A/F2/HRG/PGLYRP3/PGLYRP4/  
REG1A/REG1B/REG3A/REG3G/S100A7/SEMG1 18

GO:0016485 BP protein processing 41/1105 253/16241 0.000000176 0.0000432

0.0000346

A2M/ADAMTS2/AEBP1/C1QA/C1QB/C1QC/C1R/C1S/C7/CFHR1/CMA1/COMP/CPXM1/CPXM  
2/CPZ/CR1/CR2/CTSG/GAS1/GLI3/NGF/PCSK1/SERPINE1/SERPINE1/SPON1/THBS1/VSIG4/APOH/  
C4BPB/CARD18/CPN1/F2/FGA/FGB/FGG/IHH/MAGEA3/PCSK9/PRSS3/REN/RFX4 41

GO:0001525 BP angiogenesis 63/1105 473/16241 0.000000208 0.0000469

0.0000376

ADGRA2/ADGRB3/AGTR1/AKT3/ANGPT4/CCR2/CMA1/COL15A1/COL4A3/COL4A4/COL8A1/  
COL8A2/CXCL13/CYBB/CYP1B1/DCN/EDNR/EMILIN1/FGF10/FGF2/FGFR1/FN1/GPNMB/GREM1/  
HAND2/HSPB6/ISM1/ITGB2/JAM3/KRT1/MEOX2/MMP2/NGFR/NRP2/PDGFRB/PECAM1/PRKCB/P  
TGIS/RSPO3/SERPINE1/SERPINF1/SFRP1/SFRP2/SLIT2/SMOC2/SPARC/SULF1/THBS1/THBS2/THBS  
4/THY1/ADTRP/APOH/CXCL17/FGFBP1/HOXB13/HRG/IHH/IL17F/NOX1/NR2E1/S100A7/TERT 63

GO:0006874 BP cellular calcium ion homeostasis 60/1105 442/16241 0.000000021

0.0000469 0.0000376

ADCY5/ADCYAP1/ADCYAP1R1/AGTR1/ANK2/ANXA6/APOE/ATP1A2/ATP2B2/CASQ1/CASQ2/C

CL13/CCL14/CCL19/CCL21/CCR2/CCR4/CCR7/CCR8/CMKLR1/CNR1/CXCL12/CXCL13/CXCL9/EDNR  
A/ELANE/FGF2/FPR3/GPR174/GRIA1/HCRTR1/HTR2A/JPH2/JPH4/KCNA5/KCNK3/MS4A1/P2RX2/  
P2RY10/PLN/PRKCB/PTGDR/PTGER3/PTGFR/PTPRC/S1PR3/SLC8A1/TAC1/TAC4/TACR1/THY1/XCR  
1/ATP2C2/CCL15/EPO/F2/HTR2C/KISS1/NPFF/P2RX3 60

GO:0001503 BP ossification 53/1105 372/16241 0.000000232 0.0000496  
0.0000398

ASPN/CDH11/CHRD1/CHRD2/COL11A1/COL1A1/COL1A2/COL6A1/COMP/DDR2/DHH/DKK  
1/EGR2/GDF10/GDF5/GLI2/GLI3/GPNMB/GREM1/HAND2/IGF1/IGFBP5/ITGA11/MGP/MMP2/M  
N1/MRC2/MYOC/NPPC/OMD/PENK/RANBP3L/RIPPLY2/ROR2/RORB/RSPO2/SFRP1/SFRP2/SIX2/S  
LC8A1/SPARC/TAC1/TGFB3/TMEM119/TNC/TNN/TWIST2/VCAN/WWTR1/ADGRV1/BMP7/FGF23/  
IHH 53

GO:0002576 BP platelet degranulation 26/1105 125/16241 0.000000246 0.0000503  
0.0000403

A2M/ACTN2/F13A1/FLNA/FN1/IGF1/ISLR/MMRN1/PCDH7/PECAM1/SELP/SERPINA3/SERPIN  
E1/SERPING1/SPARC/TGFB3/THBS1/TIMP3/APOA1/APOH/FGA/FGB/FGG/HRG/ORM1/ORM2 26  
GO:0006953 BP acute-phase response 15/1105 47/16241 0.000000268 0.0000509

0.0000408

CNR1/FN1/PTGER3/SERPINA3/EPO/F2/IL22/ORM1/ORM2/REG3A/REG3G/SAA2/SAA4/TFR2  
/UGT1A1 15

GO:0061448 BP connective tissue development 41/1105 257/16241 0.000000272  
0.0000509 0.0000408

ACTA2/ANXA6/CHRD2/COL11A1/COL14A1/COL1A1/COL5A1/COL6A1/COL6A2/COL6A3/CO  
MP/EBF2/EFEMP1/EVC/FGF2/FGFR1/FRZB/GDF5/GDF6/GLI2/GLI3/GREM1/HAND2/LUM/MGP/M  
USTN1/NKX3-2/NPPC/PDGFRB/PRRX1/ROR2/RSPO2/SFRP2/SIX2/SULF1/VIT/WNT9A/BMP7/HOX  
A11/IHH/IL17F 41

GO:0050804 BP modulation of chemical synaptic transmission 58/1105 425/16241  
0.00000028 0.0000509 0.0000408

ADCYAP1/ADIPOQ/AKAP12/APOE/ATP1A2/BCHE/CACNG7/CAMK2A/CBLN1/CCR2/CDH11/C  
DH2/CHRM2/CHRNA3/CHRNA6/CNR1/DKK1/EGR2/FGF14/GRIA1/GRIK3/GRIK5/HTR2A/IGSF11/J  
PH4/KCNB1/LAMA2/LRRC4C/LRRTM1/MAP1A/NETO1/NGF/NLGN1/NPTX1/NPY5R/NRG3/NTNG1  
/NTRK2/PHF24/PRKCB/PTPRS/RELN/RETN/RGS4/ROR2/SHANK1/SHISA8/SORCS2/SORCS3/SYT11/  
SYT4/TAC1/TACR2/TNR/CEL/KISS1/NR2E1/P2RX3 58

GO:0099177 BP regulation of trans-synaptic signaling 58/1105 426/16241 0.000000303  
0.0000532 0.0000426

ADCYAP1/ADIPOQ/AKAP12/APOE/ATP1A2/BCHE/CACNG7/CAMK2A/CBLN1/CCR2/CDH11/C  
DH2/CHRM2/CHRNA3/CHRNA6/CNR1/DKK1/EGR2/FGF14/GRIA1/GRIK3/GRIK5/HTR2A/IGSF11/J  
PH4/KCNB1/LAMA2/LRRC4C/LRRTM1/MAP1A/NETO1/NGF/NLGN1/NPTX1/NPY5R/NRG3/NTNG1  
/NTRK2/PHF24/PRKCB/PTPRS/RELN/RETN/RGS4/ROR2/SHANK1/SHISA8/SORCS2/SORCS3/SYT11/  
SYT4/TAC1/TACR2/TNR/CEL/KISS1/NR2E1/P2RX3 58

GO:0007204 BP positive regulation of cytosolic calcium ion concentration 46/1105  
309/16241 0.000000411 0.0000696 0.0000558

ADCY5/ADCYAP1/ADCYAP1R1/AGTR1/ANK2/ATP1A2/CASQ1/CASQ2/CCL19/CCL21/CCR2/CC  
R4/CCR7/CCR8/CMKLR1/CNR1/CXCL13/CXCL9/EDNR/FGF2/FPR3/GPR174/HTR2A/JPH2/JPH4/M  
S4A1/P2RX2/P2RY10/PLN/PTGDR/PTGER3/PTGFR/PTPRC/S1PR3/SLC8A1/TAC1/TAC4/TACR1/THY

1/XCR1/EPO/F2/HTR2C/KISS1/NPFF/P2RX3 46  
GO:0007409 BP axonogenesis 61/1105 462/16241 0.000000441 0.0000722  
0.0000579  
APOE/BOC/CCKAR/CDH11/CDH2/CHODL/COL25A1/CSF1R/CXCL12/DCLK1/DPYSL5/DSCAML  
1/EGR2/EPHA3/EPHA5/EPHA6/EPHA7/FLRT2/FN1/GAP43/GFRA1/GFRA2/GLI2/GLI3/LAMA2/LRR  
C4C/MAG/MAP1A/NCAM1/NDN/NEFL/NFASC/NGF/NGFR/NPTX1/NRP2/NRXN3/NTN3/NTNG1/N  
TRK2/PALLD/PLXNA4/PTPRS/RELN/RNF165/SLIT2/SLIT3/SLITRK2/SLITRK3/SLITRK4/SLITRK5/THY1  
/TNN/TNR/UCHL1/ZEB2/ATOH1/BMP7/EFNA2/FEZF1/NR2E1 61  
GO:0072507 BP divalent inorganic cation homeostasis 64/1105 495/16241 0.000000488  
0.0000748 0.00006  
ADCY5/ADCYAP1/ADCYAP1R1/AGTR1/ANK2/ANXA6/APOE/ATP1A2/ATP2B2/CASQ1/CASQ2/C  
CL13/CCL14/CCL19/CCL21/CCR2/CCR4/CCR7/CCR8/CMKLR1/CNR1/CXCL12/CXCL13/CXCL9/EDNR  
A/ELANE/FGF2/FPR3/GPR174/GRIA1/HCRTR1/HTR2A/JPH2/JPH4/KCNA1/KCNA5/KCNK3/MS4A1/  
P2RX2/P2RY10/PLN/PRKCB/PTGDR/PTGER3/PTGFR/PTPRC/S1PR3/SGCD/SLC8A1/TAC1/TAC4/TAC  
R1/THY1/XCR1/ATP2C2/CCL15/EPO/F2/HTR2C/KISS1/NPFF/P2RX3/REG1A/S100A14 64  
GO:0035637 BP multicellular organismal signaling 34/1105 198/16241 0.000000495  
0.0000748 0.00006  
ABCC9/ANK2/ATP1A2/ATP1A4/ATP2B2/CACNA1G/CACNG7/CARTPT/CASQ1/CASQ2/CTNNA3  
/FLNA/FXYD6/GPR88/JAM3/KCNA1/KCNA2/KCNA5/KCNE4/KCNIP1/KCNJ5/KCNK3/MAG/NFASC/N  
PPC/NTRK2/PLN/SCN11A/SCN2B/SCN7A/SLC8A1/TNR/FXYD4/P2RX3 34  
GO:0021537 BP telencephalon development 39/1105 244/16241 0.000000503  
0.0000748 0.00006  
ALK/CDH2/COL3A1/CRTAC1/CSF1R/CXCL12/EMX2/EPHA5/FLNA/FOXP2/GLI3/KCNA1/KIRREL  
3/NEFL/NPY/NRG3/NRP2/NTRK2/P2RY12/PLXNA4/PTPRS/RELN/SLC8A1/SLIT2/SLITRK5/TNR/ZEB  
2/ATOH1/EFNA2/EMX1/FEZF1/HSD3B1/IGF2BP1/LHX5/NEUROD1/NR2E1/RFX4/SALL1/SIX3 39  
GO:0002062 BP chondrocyte differentiation 24/1105 115/16241 0.000000663  
0.0000958 0.0000768  
ANXA6/COL11A1/COL14A1/COL6A1/COL6A2/COL6A3/COMP/EFEMP1/FGFR1/GDF5/GDF6/  
GLI2/GLI3/GREM1/MUSTN1/NKX3-2/NPPC/SFRP2/SIX2/SULF1/VIT/WNT9A/HOXA11/IHH 24  
GO:0006813 BP potassium ion transport 37/1105 229/16241 0.000000748 0.000105038  
0.0000842  
ABCC9/ACTN2/ADCYAP1/ANK2/ATP1A2/ATP1A4/CASQ2/DPP6/FHL1/FLNA/HTR2A/KCNA1/K  
CNA2/KCNA4/KCNA5/KCNB1/KCNE4/KCNIP1/KCNJ5/KCNK2/KCNK3/KCNK4/KCNMA1/KCNMB1/KC  
NQ5/LRRC38/NALCN/NETO1/P2RY12/RGS4/SLC12A3/VIP/FXYD4/KCNK10/KCNV1/SLC9A2/TRPM5  
37  
GO:0050727 BP regulation of inflammatory response 51/1105 370/16241 0.00000108  
0.000146286 0.000117213  
A2M/ADCYAP1/ADIPOQ/AGTR1/APOE/C1QA/C1QB/C1QC/C1R/C1S/C7/CCL14/CCR2/CCR7/C  
FHR1/CMA1/CNR1/CR1/CR2/ELANE/FABP4/FCGR2B/IGF1/IL12B/IL21/KRT1/LRFN5/NPY5R/PTGER  
3/PTGIS/PTPRC/SERPINE1/SERPINF1/SERPING1/SIGLEC10/SUCNR1/TAC1/TLR7/TLR9/VSIG4/APO  
A1/C4BPB/CPN1/CREB3L3/CXCL17/DUOXA2/F2/IL17A/IL17F/MMP3/SCGB1A1 51  
GO:0042742 BP defense response to bacterium 38/1105 242/16241 0.0000011  
0.000146286 0.000117213  
BPI/CEBPE/CTSG/CXCL13/DEFB124/ELANE/IL12B/KLRK4-KLRK1/MPEG1/MPO/SELP/SERPINE

1/SSC5D/SYT11/TLR9/TNFSF8/BPIFA2/C10orf99/CCL20/DEFA1/DEFB1/DEFB126/DEFB4A/DMBT1  
/F2/FGA/FGB/LCN2/LYPD8/LYZL4/PGLYRP3/PGLYRP4/PRB3/REG3G/S100A14/S100A7/SEMG1/WF  
DC12 38

GO:0030449 BP regulation of complement activation 15/1105 52/162410.00000116  
0.00014822 0.000118763  
A2M/C1QA/C1QB/C1QC/C1R/C1S/C7/CFHR1/CR1/CR2/SERPING1/VSIG4/C4BPB/CPN1/F2  
15

GO:0007586 BP digestion 26/1105 135/16241 0.00000118 0.00014822 0.000118763  
FGF10/NPR3/PTGER3/SERPINA3/TAC1/TIFAB/TLR9/ALPI/APOA1/APOA2/APOA4/APOA5/CEL/  
CLPS/CLPSL1/CLPSL2/FABP1/FABP2/GUCA2A/GUCY2C/MOGAT2/MUC4/NEUROD1/PRSS1/PRSS3/  
SI 26

GO:0071804 BP cellular potassium ion transport 34/1105 206/16241 0.00000127  
0.000152081 0.000121857  
ABCC9/ACTN2/ANK2/ATP1A2/ATP1A4/CASQ2/DPP6/FHL1/FLNA/KCNA1/KCNA2/KCNA4/KCN  
A5/KCNB1/KCNE4/KCNIP1/KCNJ5/KCNK2/KCNK3/KCNK4/KCNMA1/KCNMB1/KCNQ5/LRRC38/NAL  
CN/NETO1/P2RY12/RGS4/SLC12A3/FXYD4/KCNK10/KCNV1/SLC9A2/TRPM5 34

GO:0071805 BP potassium ion transmembrane transport 34/1105 206/16241  
0.00000127 0.000152081 0.000121857  
ABCC9/ACTN2/ANK2/ATP1A2/ATP1A4/CASQ2/DPP6/FHL1/FLNA/KCNA1/KCNA2/KCNA4/KCN  
A5/KCNB1/KCNE4/KCNIP1/KCNJ5/KCNK2/KCNK3/KCNK4/KCNMA1/KCNMB1/KCNQ5/LRRC38/NAL  
CN/NETO1/P2RY12/RGS4/SLC12A3/FXYD4/KCNK10/KCNV1/SLC9A2/TRPM5 34

GO:0006939 BP smooth muscle contraction 22/1105 104/16241 0.00000151  
0.000172794 0.000138453  
ACTA2/ATP1A2/CHRM2/CHRNA3/CNN1/COMP/EDNRA/HTR2A/HTR7/KCNMA1/MYH11/MYL  
K/MYOCN/P2RX2/PTGER3/SLC8A1/SPX/SULF1/TACR1/TACR2/TIFAB/P2RX3 22

GO:2000257 BP regulation of protein activation cascade 15/1105 53/162410.00000151  
0.000172794 0.000138453  
A2M/C1QA/C1QB/C1QC/C1R/C1S/C7/CFHR1/CR1/CR2/SERPING1/VSIG4/C4BPB/CPN1/F2  
15

GO:0060326 BP cell chemotaxis 42/1105 287/16241 0.00000205 0.000228623  
0.000183186  
AGTR1/CCL13/CCL14/CCL19/CCL21/CCR2/CCR4/CCR7/CCR8/CMKLR1/CXCL12/CXCL13/CXCL  
9/CYP7B1/FGF2/FGFR1/GREM1/ITGB2/JAM3/KLRC4-KLRK1/PDGFRB/SERPINE1/SLIT2/SMOC2/TH  
BS1/THBS4/VCAM1/XCR1/C10orf99/CCL15/CCL20/CXCL17/DEFA1/DEFB4A/HRG/IL36G/IL36RN/IL  
37/S100A14/S100A7/SAA2/SAA4 42

GO:1903522 BP regulation of blood circulation 41/1105 279/16241 0.00000243  
0.000259136 0.000207635  
ABCC9/AGTR1/AGTR2/ANK2/ATP1A2/ATP1A4/ATP2B2/BVES/CACNA1G/CACNG7/CASQ1/CAS  
Q2/CEL2F2/CHRM2/CTNNA3/DES/FLNA/FXYD6/GNAO1/HSPB7/HTR2A/KCNA5/KCNE4/KCNIP1/KC  
NJ5/KCNK3/MYL3/NPPC/PLN/POPD2C/RGS4/SCN2B/SLC8A1/SPX/TAC1/CYP2J2/FGA/FGB/FGG/FX  
YD4/NPFF 41

GO:1903317 BP regulation of protein maturation 23/1105 115/16241 0.00000245  
0.000259136 0.000207635  
A2M/C1QA/C1QB/C1QC/C1R/C1S/C7/CFHR1/CR1/CR2/GAS1/SERPINE1/SERPING1/SPON1/T

HBS1/VSIG4/C4BPB/CARD18/CPN1/F2/MAGEA3/RFX4/TFR2 23  
GO:0019233 BP sensory perception of pain 21/1105 99/162410.00000248 0.000259136  
0.000207635  
ADCYAP1/CCR2/CNR1/CXCL12/HTR2A/IL12B/KCNA1/KCNA2/KCNK4/NDN/NPY1R/PENK/PHF  
24/SCN11A/SPX/TAC1/UCLH1/VIP/NPFF/P2RX3/PRDM12 21  
GO:0072503 BP cellular divalent inorganic cation homeostasis 60/1105 476/16241  
0.00000257 0.00026278 0.000210555  
ADCY5/ADCYAP1/ADCYAP1R1/AGTR1/ANK2/ANXA6/APOE/ATP1A2/ATP2B2/CASQ1/CASQ2/C  
CL13/CCL14/CCL19/CCL21/CCR2/CCR4/CCR7/CCR8/CMKLR1/CNR1/CXCL12/CXCL13/CXCL9/EDNR  
A/ELANE/FGF2/FPR3/GPR174/GRIA1/HCRTR1/HTR2A/JPH2/JPH4/KCNA5/KCNK3/MS4A1/P2RX2/  
P2RY10/PLN/PRKCB/PTGDR/PTGER3/PTGFR/PTPRC/S1PR3/SLC8A1/TAC1/TAC4/TACR1/THY1/XCR  
1/ATP2C2/CCL15/EPO/F2/HTR2C/KISS1/NPFF/P2RX3 60  
GO:0003015 BP heart process 40/1105 272/16241 0.00000315 0.000313692  
0.000251349  
ABCC9/AGTR2/ANK2/ATP1A2/ATP1A4/ATP2B2/BVES/CACNA1G/CACNG7/CASQ1/CASQ2/CEL  
F2/CHRM2/CTNNA3/DES/FLNA/FXYD6/GNAO1/HSPB7/KCNA5/KCNE4/KCNIP1/KCNJ5/KCNK3/MY  
L3/NPPC/PLN/POPDC2/RGS4/SCN2B/SGCD/SGCG/SLC8A1/SPX/TAC1/TNNT3/WWTR1/CYP2J2/FX  
YD4/NPFF 40  
GO:0006956 BP complement activation 17/1105 70/162410.00000319 0.000313692  
0.000251349  
A2M/C1QA/C1QB/C1QC/C1R/C1S/C7/CFHR1/CR1/CR2/FCN1/KRT1/SERPING1/VSIG4/C4BPB  
/CPN1/F217  
GO:0050829 BP defense response to Gram-negative bacterium 19/1105 85/16241  
0.00000326 0.000313993 0.00025159  
BPI/CTSG/ELANE/IL12B/MPEG1/SELP/SERPINE1/SSC5D/TLR9/DEFA1/DEFB1/DEFB126/DEFB  
4A/DMBT1/F2/LYPD8/LYZL4/PRB3/S100A7 19  
GO:0060047 BP heart contraction 39/1105 263/16241 0.0000034 0.000315971  
0.000253175  
ABCC9/AGTR2/ANK2/ATP1A2/ATP1A4/ATP2B2/BVES/CACNA1G/CACNG7/CASQ1/CASQ2/CEL  
F2/CHRM2/CTNNA3/DES/FLNA/FXYD6/GNAO1/HSPB7/KCNA5/KCNE4/KCNIP1/KCNJ5/KCNK3/MY  
L3/NPPC/PLN/POPDC2/RGS4/SCN2B/SGCD/SGCG/SLC8A1/SPX/TAC1/TNNT3/CYP2J2/FXYD4/NPF  
F 39  
GO:0008016 BP regulation of heart contraction 36/1105 234/16241 0.00000341  
0.000315971 0.000253175  
ABCC9/AGTR2/ANK2/ATP1A2/ATP1A4/ATP2B2/BVES/CACNA1G/CACNG7/CASQ1/CASQ2/CEL  
F2/CHRM2/CTNNA3/DES/FLNA/FXYD6/GNAO1/HSPB7/KCNA5/KCNE4/KCNIP1/KCNJ5/KCNK3/MY  
L3/NPPC/PLN/POPDC2/RGS4/SCN2B/SLC8A1/SPX/TAC1/CYP2J2/FXYD4/NPFF 36  
GO:0010466 BP negative regulation of peptidase activity 37/1105 244/16241  
0.00000354 0.000322282 0.000258232  
A2M/COL4A3/COL6A3/CR1/CRYAB/CST2/CST5/HMSD/ITIH5/NGF/NGFR/PI16/PZP/SERPINA3  
/SERPINE1/SERPINF1/SERPING1/SFRP2/SPOCK1/SPOCK3/THBS1/TIMP2/TIMP3/WNT9A/AMBP/C  
ARD18/CSTL1/FABP1/HRG/MAGEA3/PI3/R3HDML/SERPINA10/SERPINB13/SPINK4/WFDC10A/WF  
DC12 37  
GO:0085029 BP extracellular matrix assembly 10/1105 26/162410.00000396 0.000354033

0.000283672 ANTXR1/COL1A2/EFEMP2/EMILIN1/FBLN5/HAS1/MFAP4/MYH11/TNXB/IHH  
10

GO:0001523 BP retinoid metabolic process 21/1105 104/16241 0.00000567  
0.000497087 0.000398296  
ADH1B/APOE/CYP1B1/GPIHBP1/SDC3/ADH7/AKR1B10/AKR1C4/APOA1/APOA2/APOA4/APO  
C3/CLPS/CYP3A4/RBP2/TTR/UGT1A1/UGT1A3/UGT1A7/UGT1A8/UGT1A921

GO:0042730 BP fibrinolysis 10/1105 27/162410.00000591 0.000500778 0.000401253  
KRT1/SERPINE1/SERPING1/THBS1/APOH/F2/FGA/FGB/FGG/HRG 10

GO:0072378 BP blood coagulation, fibrin clot formation 10/1105 27/162410.00000591  
0.000500778 0.000401253 A2M/F13A1/FBLN1/GP5/SERPING1/APOH/F2/FGA/FGB/FGG  
10

GO:0070613 BP regulation of protein processing 22/1105 113/16241 0.00000639  
0.000530678 0.000425211  
A2M/C1QA/C1QB/C1QC/C1R/C1S/C7/CFHR1/CR1/CR2/GAS1/SERPINE1/SERPING1/SPON1/T  
HBS1/VSIG4/C4BPB/CARD18/CPN1/F2/MAGEA3/RFX422

GO:0031589 BP cell-substrate adhesion 46/1105 341/16241 0.00000648 0.000530678  
0.000425211  
ABI3BP/ACTN2/ANTXR1/AXL/BVES/CCDC80/CCL21/CCR7/COL1A1/COL3A1/COL8A1/DDR2/E  
MILIN1/EPHA3/FBLN1/FBLN2/FBLN5/FERMT2/FLNA/FN1/ITGA11/ITGB2/ITGBL1/JAM3/LIMS2/M  
MRN1/MYOC/PECAM1/SERPINE1/SFRP1/SIGLEC1/SMOC2/SORBS1/SPOCK1/THBS1/THY1/TNN/V  
CAM1/VIT/APOA1/FGA/FGB/FGG/HRG/MUC4/OLFM4 46

GO:2000146 BP negative regulation of cell motility 38/1105 262/16241 0.00000767  
0.000617911 0.000495108  
ADIPOQ/AGTR2/ANGPT4/APOE/CCL21/COL3A1/CXCL12/CXCL13/CYP1B1/DCN/DPYSL3/EMIL  
IN1/FBLN1/FGF2/GREM1/HAS1/IGFBP5/KLRC4-KLRK1/MEOX2/MYOC/NAV3/NRG3/PODN/SERPI  
NE1/SERPINF1/SFRP1/SFRP2/SLIT2/SPOCK3/SULF1/THBS1/THY1/TMEFF2/TNN/ADTRP/APOH/HR  
G/SEMG138

GO:0018149 BP peptide cross-linking 15/1105 60/162410.0000082 0.000640668  
0.000513342  
BGN/COL3A1/DCN/F13A1/FLG/FN1/KRT1/SPOCK3/THBS1/PI3/SPRR2A/SPRR2D/SPRR2E/SPR  
R2F/TGM3 15

GO:0034765 BP regulation of ion transmembrane transport 57/1105 461/16241  
0.00000822 0.000640668 0.000513342  
ACTN2/ANK2/ATP1A2/CACNA1G/CACNG7/CASQ1/CASQ2/CCR2/CXCL9/CYBB/DPP6/FGF14/F  
HL1/FLNA/FXYD6/GRIA1/HTR3A/JPH2/JPH4/KCNA1/KCNA2/KCNA4/KCNA5/KCNB1/KCNE4/KCNIP  
1/KCNJ5/KCNK4/KCNMA1/KCNMB1/KCNQ5/LRRC38/NALCN/NEFL/NETO1/NLGN1/PLN/RELN/RGS  
4/SCN11A/SCN2B/SCN7A/SHANK1/SHISA8/SLC8A1/STAC/THBS1/THY1/TLR9/EPO/F2/FXYD4/KCN  
K10/KCNV1/NOX1/PCSK9/TRPM5 57

GO:0010951 BP negative regulation of endopeptidase activity 35/1105 234/16241  
0.00000878 0.000674096 0.000540127  
A2M/COL4A3/COL6A3/CR1/CRYAB/CST2/CST5/HMSD/ITIH5/NGF/NGFR/PZP/SERPINA3/SER  
PINE1/SERPINF1/SERPING1/SFRP2/SPOCK1/SPOCK3/THBS1/TIMP2/TIMP3/WNT9A/AMBP/CARD  
18/CSTL1/FABP1/HRG/MAGEA3/PI3/SERPINA10/SERPINB13/SPINK4/WFDC10A/WFDC1235

GO:0002455 BP humoral immune response mediated by circulating immunoglobulin 13/1105

47/162410.00000995 0.000746425 0.00059808  
C1QA/C1QB/C1QC/C1R/C1S/C7/CR1/CR2/FCER2/FCGR2B/PTPRC/SERPING1/C4BPB 13  
GO:0045765 BP regulation of angiogenesis 39/1105 275/16241 0.00001 0.000746425  
0.00059808  
ADGRA2/ADGRB3/AGTR1/AKT3/ANGPT4/CCR2/CMA1/COL4A3/CXCL13/CYBB/CYP1B1/DCN/  
EMILIN1/FGF2/GPNMB/HSPB6/ISM1/ITGB2/KRT1/MEOX2/NGFR/PRKCB/PTGIS/SERPINE1/SERPIN  
F1/SFRP1/SFRP2/SMOC2/SPARC/SULF1/THBS1/THBS2/THBS4/APOH/FGFBP1/HRG/IL17F/NR2E1/  
TERT39  
GO:0051604 BP protein maturation 43/1105 316/16241 0.0000103 0.000756386  
0.000606062  
A2M/ADAMTS2/AEBP1/C1QA/C1QB/C1QC/C1R/C1S/C7/CFHR1/CMA1/COMP/CPXM1/CPXM  
2/CPZ/CR1/CR2/CTSG/GAS1/GLI3/NGF/PCSK1/SERPINE1/SERPING1/SPON1/THBS1/VSIG4/APOH/  
C4BPB/CARD18/CPN1/DUOXA2/F2/FGA/FGB/FGG/IHH/MAGEA3/PCSK9/PRSS3/REN/RFX4/TFR2  
43  
GO:1901342 BP regulation of vasculature development 42/1105 306/16241 0.0000106  
0.000756386 0.000606062  
ADGRA2/ADGRB3/AGTR1/AKT3/ANGPT4/CCR2/CMA1/COL4A3/CXCL13/CYBB/CYP1B1/DCN/  
EMILIN1/FGF2/GPNMB/HSPB6/ISM1/ITGB2/KRT1/MEOX2/MYOC/NGFR/PRKCB/PTGIS/SERPINE  
1/SERPINF1/SFRP1/SFRP2/SMOC2/SPARC/SULF1/THBS1/THBS2/THBS4/APOH/BMP7/FGFBP1/HR  
G/IL17F/NR2E1/TERT/XDH 42  
GO:0002683 BP negative regulation of immune system process 53/1105 422/16241  
0.0000109 0.000756386 0.000606062  
A2M/ADCYAP1/ADIPOQ/AXL/BPI/C1QC/CARTPT/CCL21/CCR2/CD22/CLEC4G/CNR1/COL3A1/  
CR1/CXCL12/EMILIN1/FBN1/FCGR2B/FGL2/GLI3/GPNMB/GREM1/HLA-DOA/IL12B/IL31RA/KLRCA  
-KLRK1/LILRA4/LILRB4/LRFN5/LRRC32/NPY5R/PLA2G2D/PTPRC/PTPRS/SERPING1/SFRP1/SLIT2/T  
GFB3/THBS1/THY1/TLR9/TNFRSF13B/VSIG4/ADTRP/AMBP/APOA1/APOA2/C4BPB/IHH/PGLYRP3/  
PGLYRP4/PLA2G2F/SCGB1A1 53  
GO:0015837 BP amine transport 20/1105 100/16241 0.0000109 0.000756386  
0.000606062  
AGTR2/ATP1A2/CARTPT/CHRNA3/CHRNA6/CNR1/CXCL12/HTR2A/KCNA2/KCNB1/NPY5R/P2  
RY12/RGS4/SYT11/SYT4/SYT6/TACR2/VIP/DDC/RHCG 20  
GO:2000181 BP negative regulation of blood vessel morphogenesis 20/1105 100/16241  
0.0000109 0.000756386 0.000606062  
ADGRB3/ANGPT4/CCR2/COL4A3/DCN/EMILIN1/ISM1/MEOX2/NGFR/SERPINE1/SERPINF1/SP  
ARC/SULF1/THBS1/THBS2/THBS4/APOH/HRG/IL17F/XDH 20  
GO:0016101 BP diterpenoid metabolic process 21/1105 110/16241 0.0000141  
0.000963713 0.000772185  
ADH1B/APOE/CYP1B1/GPIHBP1/SDC3/ADH7/AKR1B10/AKR1C4/APOA1/APOA2/APOA4/APO  
C3/CLPS/CYP3A4/RBP2/TTR/UGT1A1/UGT1A3/UGT1A7/UGT1A8/UGT1A921  
GO:0034370 BP triglyceride-rich lipoprotein particle remodeling 7/1105 14/16241  
0.0000149 0.000976795 0.000782667  
APOE/GPIHBP1/APOA1/APOA2/APOA4/APOA5/APOC3 7  
GO:0010811 BP positive regulation of cell-substrate adhesion 22/1105 119/16241  
0.0000152 0.000976795 0.000782667

ABI3BP/CCDC80/CCL21/CCR7/COL8A1/EMILIN1/FBLN2/FLNA/FN1/LIMS2/MMRN1/MYOC/S  
FRP1/SMOC2/THY1/VIT/APOA1/FGA/FGB/FGG/HRG/OLFM4 22

GO:0007157 BP heterophilic cell-cell adhesion via plasma membrane cell adhesion molecules  
12/1105 42/162410.0000152 0.000976795 0.000782667

CADM3/CBLN1/CDH2/HMCN1/NLGN1/SCARF2/SELP/TENM3/TENM4/VCAM1/LGALS7B/REG  
3A 12

GO:1990868 BP response to chemokine 19/1105 94/162410.0000154 0.000976795  
0.000782667

ACKR1/CCL13/CCL14/CCL19/CCL21/CCR2/CCR4/CCR7/CCR8/CMKLR1/CXCL12/CXCL13/CXCL  
9/SLIT2/SLIT3/XCR1/CCL15/CCL20/REG1A 19

GO:1990869 BP cellular response to chemokine 19/1105 94/162410.0000154  
0.000976795 0.000782667

ACKR1/CCL13/CCL14/CCL19/CCL21/CCR2/CCR4/CCR7/CCR8/CMKLR1/CXCL12/CXCL13/CXCL  
9/SLIT2/SLIT3/XCR1/CCL15/CCL20/REG1A 19

GO:0070098 BP chemokine-mediated signaling pathway 18/1105 86/162410.0000155  
0.000976795 0.000782667

ACKR1/CCL13/CCL14/CCL19/CCL21/CCR2/CCR4/CCR7/CCR8/CMKLR1/CXCL12/CXCL13/CXCL  
9/SLIT2/SLIT3/XCR1/CCL15/CCL20 18

GO:0030900 BP forebrain development 48/1105 374/16241 0.0000159 0.000988867  
0.00079234

ADCYAP1/ALK/AXL/CCKAR/CDH2/COL3A1/CRTAC1/CSF1R/CXCL12/DCLK1/DKK1/EMX2/EPHA  
5/FGF10/FGFR1/FLNA/FOXP2/GLI2/GLI3/GNAO1/KCNA1/KIRREL3/NEFL/NPY/NRG3/NRP2/NTRK2  
/P2RY12/PLXNA4/PTPRS/RELN/SLC8A1/SLIT2/SLITRK5/TNR/ZEB2/ATOH1/EFNA2/EMX1/FEZF1/HS  
D3B1/IGF2BP1/LHX5/NEUROD1/NR2E1/RFX4/SALL1/SIX3 48

GO:0034378 BP chylomicron assembly 6/1105 10/162410.0000162 0.000989879  
0.000793151 APOE/APOA1/APOA2/APOA4/APOC3/MTTP 6

GO:1901343 BP negative regulation of vasculature development 21/1105 111/16241  
0.0000163 0.000989879 0.000793151

ADGRB3/ANGPT4/CCR2/COL4A3/DCN/EMILIN1/ISM1/MEOX2/NGFR/SERPINE1/SERPINF1/SP  
ARC/SULF1/THBS1/THBS2/THBS4/APOH/BMP7/HRG/IL17F/XDH21

GO:0006721 BP terpenoid metabolic process 22/1105 120/16241 0.0000174  
0.001041552 0.000834554

ADH1B/APOE/CYP1B1/GPIHBP1/SDC3/ADH7/AKR1B10/AKR1C4/APOA1/APOA2/APOA4/APO  
C3/CLPS/CYP2C19/CYP3A4/RBP2/TTR/UGT1A1/UGT1A3/UGT1A7/UGT1A8/UGT1A922

GO:0001649 BP osteoblast differentiation 31/1105 203/16241 0.0000186  
0.001099075 0.000880645

COL1A1/COL6A1/DDR2/DHH/GDF10/GLI2/GLI3/GPNMB/GREM1/HAND2/IGF1/IGFBP5/ITGA  
11/MRC2/MYOC/NPPC/PENK/RANBP3L/RORB/RSPO2/SFRP1/SFRP2/TMEM119/TNC/TNN/TWIST  
2/VCAN/WWTR1/BMP7/FGF23/IHH 31

GO:0070374 BP positive regulation of ERK1 and ERK2 cascade 30/1105 194/16241  
0.0000197 0.001150753 0.000922053

ADCYAP1/AKAP12/APOE/CCL13/CCL14/CCL19/CCL21/CCR7/CSF1R/FGF10/FGF2/FLT3/GPNM  
B/HAND2/HCTR1/HTR2A/NPY5R/PDGFRB/PTPRC/SCIMP/CCL15/CCL20/EPO/FGA/FGB/FGF23/F  
GG/HTR2C/S100A7/SLC30A10 30

GO:0048660 BP regulation of smooth muscle cell proliferation 23/1105 130/16241  
0.0000206 0.001189959 0.000953467  
ADAMTS1/ADIPOQ/CNN1/ELANE/ELN/FGF2/IGF1/IGFBP5/IL12B/MMP2/MYOCD/NPPC/NPR  
3/NPY5R/OGN/PDGFRB/RBPMS2/TGFB3/THBS1/VIP/VIPR2/NOX1/TERT 23

GO:0048659 BP smooth muscle cell proliferation 23/1105 131/16241 0.0000234  
0.001336395 0.0010708  
ADAMTS1/ADIPOQ/CNN1/ELANE/ELN/FGF2/IGF1/IGFBP5/IL12B/MMP2/MYOCD/NPPC/NPR  
3/NPY5R/OGN/PDGFRB/RBPMS2/TGFB3/THBS1/VIP/VIPR2/NOX1/TERT 23

GO:0010959 BP regulation of metal ion transport 47/1105 370/16241 0.0000254  
0.001431888 0.001147314  
ACTN2/ADCYAP1/ADCYAP1R1/ANK2/ATP1A2/CAMK2A/CASQ1/CASQ2/CNTN1/CXCL12/CXCL  
9/DPP6/FGF14/FHL1/FLNA/FXYD6/GNAO1/HTR2A/JPH2/JPH4/KCNA1/KCNA5/KCNE4/KCNIP1/KC  
NMB1/LRRC38/MYLK/NETO1/P2RX2/P2RY12/PDGFRB/PLN/RGS4/SCN2B/SLC8A1/STAC/THY1/TLR  
9/VIP/ATP2C2/EPO/F2/FXYD4/P2RX3/PCSK9/SEMG1/SLC30A10 47

GO:0097529 BP myeloid leukocyte migration 30/1105 197/16241 0.0000266  
0.001484298 0.001189309  
CCL13/CCL14/CCL19/CCL21/CCR2/CCR7/CMKLR1/CXCL12/CXCL13/CXCL9/EMILIN1/GREM1/I  
TGB2/JAM3/P2RY12/PECAM1/ROR2/SERPINE1/SLIT2/THBS1/THBS4/CCL15/CCL20/CXCL17/IL17A  
/IL36G/IL36RN/IL37/S100A14/S100A7 30

GO:0016525 BP negative regulation of angiogenesis 19/1105 98/16241 0.0000285  
0.001547356 0.001239835  
ADGRB3/ANGPT4/CCR2/COL4A3/DCN/EMILIN1/ISM1/MEOX2/NGFR/SERPINE1/SERPINF1/SP  
ARC/SULF1/THBS1/THBS2/THBS4/APOH/HRG/IL17F 19

GO:0030336 BP negative regulation of cell migration 35/1105 247/16241 0.0000287  
0.001547356 0.001239835  
ADIPOQ/AGTR2/ANGPT4/APOE/CCL21/COL3A1/CXCL12/CXCL13/CYP1B1/DCN/DPYSL3/EMIL  
IN1/FGF2/GREM1/HAS1/IGFBP5/KLRC4-KLRK1/MEOX2/MYOCD/NAV3/NRG3/PODN/SERPINE1/SE  
RPINF1/SFRP1/SFRP2/SLIT2/SULF1/THBS1/THY1/TMEFF2/TNN/ADTRP/APOH/HRG 35

GO:0032103 BP positive regulation of response to external stimulus 40/1105 298/16241  
0.0000287 0.001547356 0.001239835  
AGTR1/CCL14/CCL19/CCL21/CCR2/CCR4/CCR7/CMKLR1/CNR1/CXCL12/CXCL13/FABP4/FGF1  
0/FGF2/FGFR1/IL12B/IL21/NPY/NPY5R/P2RY12/PDGFRB/PTGER3/SERPINE1/SLIT2/SMOC2/SUCN  
R1/TAC1/THBS1/THBS4/TLR7/TLR9/APOH/CREB3L3/CXCL17/F2/HRG/IL17A/IL17F/S100A14/S100  
A7 40

GO:0009410 BP response to xenobiotic stimulus 39/1105 288/16241 0.0000294  
0.001570223 0.001258157  
AGTR2/AOC3/BCHE/CASQ2/CDO1/CNR1/CYP1B1/FMO1/FMO2/GHR/GNAO1/HTR2A/HTR3A  
/PENK/RGS4/SERPINF1/SLC8A1/SLITRK5/TAC1/ABCC2/CYP2B6/CYP2C19/CYP2J2/CYP3A4/EPO/GS  
TA1/GSTA2/GSTA3/NAT2/NPFF/NR1I2/PCK1/PPP1R1B/SCGB1A1/UGT1A1/UGT1A3/UGT1A7/UGT  
1A8/UGT1A9 39

GO:0071621 BP granulocyte chemotaxis 21/1105 116/16241 0.0000326 0.001687017  
0.00135174  
CCL13/CCL14/CCL19/CCL21/CCR7/CMKLR1/CXCL13/CXCL9/ITGB2/JAM3/SLIT2/THBS1/THBS  
4/CCL15/CCL20/CXCL17/IL36G/IL36RN/IL37/S100A14/S100A7 21

GO:0060740 BP prostate gland epithelium morphogenesis 9/1105 26/162410.0000328  
0.001687017 0.00135174 AR/CYP7B1/FGF10/GLI2/SFRP1/SULF1/TNC/BMP7/HOXB13  
9

GO:0007200 BP phospholipase C-activating G protein-coupled receptor signaling pathway  
19/1105 99/162410.0000331 0.001687017 0.00135174  
ACTN2/AGTR1/CCKAR/CHRM2/CMKLR1/FPR3/GPR174/GRP/GRPR/HTR2A/NPR3/P2RY10/P2  
RY12/PTGER3/TACR1/VIP/F2/HTR2C/KISS1 19

GO:0002604 BP regulation of dendritic cell antigen processing and presentation 6/1105  
11/162410.0000336 0.001687017 0.00135174  
CCL19/CCL21/CCR7/FCGR2B/FGL2/THBS1 6

GO:0010872 BP regulation of cholesterol esterification 6/1105 11/162410.0000336  
0.001687017 0.00135174 AGTR1/APOE/APOA1/APOA2/APOA4/APOA5 6

GO:0090287 BP regulation of cellular response to growth factor stimulus 36/1105  
259/16241 0.0000337 0.001687017 0.00135174  
ADGRA2/AGTR2/ASPN/CHRD1/CXCL13/DCN/DKK1/EMILIN1/FBN1/FGF10/FGF2/FGFR1/FST  
L1/GDF5/GREM1/GREM2/HTRA3/LTBP1/MYOC/PRKCB/RBPMS2/RNF165/SFRP1/SFRP2/SFRP4/  
SLIT2/SMOC2/SULF1/TGFB1I1/TGFB3/THBS1/FGFBP1/FOLR1/HRG/IL17F/XDH 36

GO:0097530 BP granulocyte migration 23/1105 134/16241 0.000034 0.001687017  
0.00135174  
CCL13/CCL14/CCL19/CCL21/CCR7/CMKLR1/CXCL13/CXCL9/ITGB2/JAM3/PECAM1/SLIT2/THB  
S1/THBS4/CCL15/CCL20/CXCL17/IL17A/IL36G/IL36RN/IL37/S100A14/S100A7 23

GO:0007611 BP learning or memory 35/1105 251/16241 0.0000403 0.001974276  
0.001581909  
ADGRB3/APOE/ATP1A2/BCHE/CNR1/DKK1/EGR2/EN1/FOXP2/GABRA5/GPR88/GRIA1/GRPR/  
HTR2A/JPH4/KCNK2/KCNK4/MAP1A/NETO1/NGF/NRXN2/NRXN3/NTRK2/RELN/SERPINF1/SHANK  
1/SORCS3/SYT4/TAC1/TACR2/TIFAB/TNR/VIP/KCNK10/PPP1R1B 35

GO:1900047 BP negative regulation of hemostasis 13/1105 53/162410.0000406  
0.001974276 0.001581909  
APOE/COMP/KRT1/SERPINE1/SERPINE1/THBS1/ADTRP/APOH/F2/FGA/FGB/FGG/HRG 13

GO:0071674 BP mononuclear cell migration 17/1105 84/162410.0000419 0.002002772  
0.001604741  
CCL13/CCL14/CCL19/CCL21/CCR2/CMKLR1/CXCL12/GREM1/PECAM1/SERPINE1/SLIT2/THBS  
1/CCL15/CCL20/CXCL17/S100A14/S100A7 17

GO:0007389 BP pattern specification process 53/1105 443/16241 0.000042 0.002002772  
0.001604741  
AR/ARMC4/BARX1/BICC1/C1QA/DKK1/DSCAML1/EGR2/EMX2/EN1/FGF10/FGFR1/GLI2/GLI3  
/GREM1/GREM2/HAND2/HEYL/IRX1/MEOX2/NKX3-2/NRG3/NRP2/RELN/RIPPLY2/ROR2/SFRP1/S  
FRP2/SIX2/TBX18/TIFAB/ZEB2/BMP7/CDX1/CDX2/EMX1/EVX1/FEZF1/FOLR1/FOXA2/FOXH1/GRH  
L3/HOXA11/HOXC13/HOXD11/IHH/NEUROD1/NKX6-2/NOTO/RFX4/SIX3/SP8/TDRD5 53

GO:0007158 BP neuron cell-cell adhesion 7/1105 16/162410.0000439 0.002073465  
0.001661385 ASTN1/NCAM2/NLGN1/NRXN2/NRXN3/TNR/CEL 7

GO:0051952 BP regulation of amine transport 18/1105 93/162410.0000471 0.002201844  
0.001764249  
AGTR2/ATP1A2/CARTPT/CHRNA3/CHRNA6/CNR1/CXCL12/HTR2A/KCNA2/KCNB1/NPY5R/P2

RY12/RGS4/SYT11/SYT4/SYT6/TACR2/VIP 18

GO:0048705 BP skeletal system morphogenesis 33/1105 233/16241 0.0000485  
0.002226153 0.001783728  
ANXA6/COL11A1/COL14A1/COL1A1/COL6A1/COL6A2/COL6A3/COMP/DSCAML1/FGFR1/GLI3/GREM1/MGP/MMP2/NKX3-2/NPPC/PRRX1/RIPPLY2/ROR2/SFRP1/SFRP2/SFRP4/SIX2/TGFB3/TIFAB/TMEM119/VIT/WNT9A/WNT9B/BMP7/CDX1/HOXA11/IHH 33

GO:0007178 BP transmembrane receptor protein serine/threonine kinase signaling pathway  
42/1105 326/16241 0.0000485 0.002226153 0.001783728  
ASPN/CHRD1/CILP/COL1A2/COL3A1/COMP/DKK1/EMILIN1/FBN1/FERMT2/FGF10/FSTL1/GDF10/GDF5/GDF6/GREM1/GREM2/HTRA3/LRRC32/LTBP1/LTBP2/MYOC/RBPM52/RGMA/RNF165/ROR2/SFRP1/SFRP2/SFRP4/SMAD9/SULF1/TGFB11/TGFB3/THBS1/VIM/WWTR1/AKAP4/BMP7/DSG4/FOLR1/FOXH1/IL17F 42

GO:0045861 BP negative regulation of proteolysis 43/1105 338/16241 0.0000534  
0.002429032 0.001946287  
A2M/COL4A3/COL6A3/CR1/CRYAB/CST2/CST5/GAS1/HMSD/ITIH5/MAP1A/NGF/NGFR/PI16/PZP/SERPINA3/SERPINE1/SERPINF1/SERPING1/SFRP2/SPOCK1/SPOCK3/THBS1/TIMP2/TIMP3/VISG4/WNT9A/AMBP/C4BPB/CARD18/CSTL1/F2/FABP1/HRG/MAGEA3/PI3/R3HDM1/SERPINA10/SERPINB13/SPINK4/TM4SF20/WFDC10A/WFDC12 43

GO:0003002 BP regionalization 44/1105 349/16241 0.0000545 0.002457398  
0.001969015  
AR/BARX1/C1QA/DKK1/DSCAML1/EGR2/EMX2/EN1/FGF10/FGFR1/GLI2/GLI3/GREM1/GREM2/HEYL/IRX1/MEOX2/NRP2/RELN/RIPPLY2/ROR2/SFRP1/SFRP2/SIX2/TBX18/TIFAB/ZEB2/CDX1/CDX2/EMX1/EVX1/FEZF1/FOXA2/FOXH1/HOXA11/HOXC13/HOXD11/NEUROD1/NKX6-2/NOTO/RFX4/SIX3/SP8/TDRD5 44

GO:0021543 BP pallium development 26/1105 166/16241 0.0000553 0.002467731  
0.001977294  
ALK/CDH2/COL3A1/EMX2/EPHA5/FLNA/FOXP2/GLI3/KCNA1/KIRREL3/NEFL/NPY/NRP2/NTRK2/P2RY12/PTPRS/RELN/SLIT2/ZEB2/ATOH1/EMX1/HSD3B1/IGF2BP1/LHX5/NEUROD1/NR2E1 26

GO:0002548 BP monocyte chemotaxis 14/1105 62/16241 0.0000558 0.002470309  
0.00197936  
CCL13/CCL14/CCL19/CCL21/CCR2/CXCL12/GREM1/SERPINE1/SLIT2/CCL15/CCL20/CXCL17/S100A14/S100A7 14

GO:0006958 BP complement activation, classical pathway 10/1105 34/16241 0.0000593  
0.002600966 0.002084051 C1QA/C1QB/C1QC/C1R/C1S/C7/CR1/CR2/SERPING1/C4BPB 10

GO:0002237 BP response to molecule of bacterial origin 42/1105 329/16241 0.00006  
0.002601741 0.002084672  
AKAP12/AXL/BPI/CCR7/CEBPE/CNR1/CTSG/CXCL13/CXCL9/DCN/ELANE/FCGR2B/FGF10/FMO1/IL10RA/IL12B/KLRK1/MPO/MRC1/PENK/PTGFR/SELP/SERPINE1/SPARC/SSC5D/TAC1/TLR9/VCAM1/VIM/ABCC2/DEFA1/EPO/IL36G/IL36RN/IL37/LCN2/PCK1/REN/S100A14/S100A7/SCGB1A1/UGT1A1 42

GO:0002468 BP dendritic cell antigen processing and presentation 6/1105 12/16241  
0.0000633 0.002601741 0.002084672 CCL19/CCL21/CCR7/FCGR2B/FGL2/THBS1 6

GO:0002921 BP negative regulation of humoral immune response 6/1105 12/16241  
0.0000633 0.002601741 0.002084672 A2M/CR1/FCGR2B/SERPING1/VSIG4/C4BPB 6

GO:0033700 BP phospholipid efflux 6/1105 12/16241 0.0000633 0.002601741  
0.002084672 APOE/APOA1/APOA2/APOA4/APOA5/APOC3 6

GO:0034372 BP very-low-density lipoprotein particle remodeling 6/1105 12/16241  
0.0000633 0.002601741 0.002084672 APOE/APOA1/APOA2/APOA4/APOA5/APOC3  
6

GO:0034368 BP protein-lipid complex remodeling 9/1105 28/16241 0.0000641  
0.002601741 0.002084672  
AGTR1/APOE/GPIHBP1/MPO/APOA1/APOA2/APOA4/APOA5/APOC3 9

GO:0034369 BP plasma lipoprotein particle remodeling 9/1105 28/16241 0.0000641  
0.002601741 0.002084672  
AGTR1/APOE/GPIHBP1/MPO/APOA1/APOA2/APOA4/APOA5/APOC3 9

GO:0060512 BP prostate gland morphogenesis 9/1105 28/16241 0.0000641  
0.002601741 0.002084672 AR/CYP7B1/FGF10/GLI2/SFRP1/SULF1/TNC/BMP7/HOXB13  
9

GO:0071466 BP cellular response to xenobiotic stimulus 27/1105 177/16241  
0.0000641 0.002601741 0.002084672  
AGTR2/AOC3/BCHE/CASQ2/CDO1/CYP1B1/FMO1/FMO2/GHR/SERPINF1/SLC8A1/ABCC2/CY  
P2B6/CYP2C19/CYP2J2/CYP3A4/GSTA1/GSTA2/GSTA3/NAT2/NR1I2/PCK1/UGT1A1/UGT1A3/UGT  
1A7/UGT1A8/UGT1A9 27

GO:0071622 BP regulation of granulocyte chemotaxis 11/1105 41/16241 0.0000652  
0.002609063 0.002090538  
CCL19/CCL21/CCR7/CMKLR1/JAM3/SLIT2/THBS1/THBS4/CXCL17/S100A14/S100A7 11

GO:0010596 BP negative regulation of endothelial cell migration 12/1105 48/16241  
0.0000653 0.002609063 0.002090538  
AGTR2/ANGPT4/APOE/CXCL13/DCN/FGF2/MEOX2/SERPINF1/SLIT2/THBS1/APOH/HRG 12

GO:1903035 BP negative regulation of response to wounding 17/1105 87/16241  
0.0000669 0.002648819 0.002122393  
APOE/FGF2/KRT1/PTPRS/RGMA/SERPINE1/SERPING1/SIGLEC10/THBS1/TNR/ADTRP/APOH/F  
2/FGA/FGB/FGG/HRG 17

GO:0007517 BP muscle organ development 46/1105 374/16241 0.0000684  
0.002686727 0.002152767  
ASB2/BVES/CASQ1/CHODL/COL11A1/COL19A1/COL3A1/COL6A3/CRYAB/DCN/DKK1/EGR2/E  
LN/EVC/FGF2/FGFR1/FHL1/FOXP2/GREM1/HEG1/HEY1/IGF1/ITGA11/JPH2/KCNK2/LAMA2/MEOX  
2/MKX/MRAS/MYL3/MYLK/MYOC/MYOZ2/P2RX2/PI16/POPDC2/RBM24/RGS4/SGCD/SGCG/SM  
YD1/TAGLN/TIFAB/UNC45B/ZFPM2/FOXH1 46

GO:0006805 BP xenobiotic metabolic process 21/1105 122/16241 0.0000704  
0.002746314 0.002200511  
AOC3/BCHE/CDO1/CYP1B1/FMO1/FMO2/GHR/CYP2B6/CYP2C19/CYP2J2/CYP3A4/GSTA1/G  
STA2/GSTA3/NAT2/NR1I2/UGT1A1/UGT1A3/UGT1A7/UGT1A8/UGT1A9 21

GO:2000147 BP positive regulation of cell motility 57/1105 497/16241 0.0000719  
0.002781145 0.00222842  
ADAMTS1/ADGRA2/AKAP12/AKT3/ANGPT4/CCL19/CCL21/CCR2/CCR7/CMKLR1/COL1A1/CSF

1R/CXCL12/CXCL13/DDR2/ELANE/FGF10/FGF2/FGF7/FGFR1/FLNA/FN1/GPNMB/IGF1/IGFBP5/M  
 YLK/MYOC/NRP2/P2RY12/PDGFRB/PECAM1/PTPRC/RELN/ROR2/SELP/SERPINE1/SLC8A1/SMOC2  
 /SPARC/TAC1/TAC4/TACR1/TACR2/THBS1/THBS4/THY1/TWIST2/BMP7/CCL20/CXCL17/DEFB1/DU  
 OX2/DUOXA2/FGFBP1/S100A14/S100A7/TERT 57  
 GO:0050921 BP positive regulation of chemotaxis 22/1105 132/16241 0.0000789  
 0.00302874 0.002426809  
 CCL19/CCL21/CCR2/CCR4/CCR7/CMKLR1/CXCL12/CXCL13/FGF10/FGF2/FGFR1/P2RY12/PDG  
 FRB/SERPINE1/SLIT2/SMOC2/SUCNR1/THBS1/THBS4/CXCL17/S100A14/S100A7 22  
 GO:0001708 BP cell fate specification 18/1105 97/162410.0000838 0.003191599  
 0.002557301  
 AR/DHH/DKK1/FGF2/FGFR1/GLI2/GLI3/PTCH2/SFRP2/SIX2/TBX18/TENM4/ATOH1/EVX1/FO  
 XA2/HOXA11/IHH/NKX6-2 18  
 GO:0090288 BP negative regulation of cellular response to growth factor stimulus 23/1105  
 142/16241 0.0000863 0.00324091 0.002596811  
 ADGRA2/AGTR2/ASPN/CHRD1/CXCL13/DCN/DKK1/EMILIN1/FBN1/GREM1/GREM2/HTRA3/  
 LTBP1/RBPMS2/SFRP1/SFRP2/SLIT2/SULF1/TGFB11/TGFB3/THBS1/HRG/XDH 23  
 GO:0034367 BP protein-containing complex remodeling 9/1105 29/162410.0000873  
 0.00324091 0.002596811  
 AGTR1/APOE/GPIHBP1/MPO/APOA1/APOA2/APOA4/APOA5/APOC3 9  
 GO:0099068 BP postsynapse assembly 9/1105 29/162410.0000873 0.00324091  
 0.002596811 CBLN1/CDH2/GAP43/LRRTM1/NLGN1/NRXN2/PTPRS/SHANK1/CEL 9  
 GO:0070372 BP regulation of ERK1 and ERK2 cascade 36/1105 271/16241 0.0000878  
 0.00324091 0.002596811  
 ADCYAP1/ADIPOQ/AKAP12/APOE/CCL13/CCL14/CCL19/CCL21/CCR7/CSF1R/EMILIN1/EPHA7  
 /FBLN1/FGF10/FGF2/FLT3/FN1/GPNMB/HAND2/HCTR1/HTR2A/NPY5R/PDGFRB/PTPRC/SCIMP/  
 TIMP3/CCL15/CCL20/EPO/FGA/FGB/FGF23/FGG/HTR2C/S100A7/SLC30A10 36  
 GO:0033555 BP multicellular organismal response to stress 15/1105 73/162410.0000974  
 0.003571031 0.002861325  
 ADCYAP1/ADCYAP1R1/APOE/GABRA5/P2RX2/PENK/RELN/SLC6A2/TAC1/TACR1/THBS1/THBS  
 4/HTR2C/NR2E1/P2RX3 15  
 GO:0030278 BP regulation of ossification 27/1105 182/16241 0.000104108  
 0.003780415 0.003029095  
 COMP/DDR2/DKK1/EGR2/GDF10/GLI3/GREM1/HAND2/IGF1/IGFBP5/MGP/NPPC/OMD/RAN  
 BP3L/RORB/SFRP1/SFRP2/SIX2/SLC8A1/TAC1/TGFB3/TMEM119/TNN/TWIST2/ADGRV1/BMP7/F  
 GF23 27  
 GO:0003416 BP endochondral bone growth 11/1105 43/162410.000104669 0.003780415  
 0.003029095  
 ANXA6/BNC2/COL14A1/COL6A1/COL6A2/COL6A3/COMP/DDR2/EVC/NPPC/VIT 11  
 GO:0045785 BP positive regulation of cell adhesion 47/1105 392/16241 0.000106632  
 0.003796114 0.003041675  
 ABI3BP/CCDC80/CCL19/CCL21/CCR2/CCR7/CLECL1/COL8A1/CXCL12/CXCL13/ELANE/EMILIN  
 1/FBLN2/FLNA/FN1/GLI2/GLI3/HLA-DPA1/HLA-DPB1/IGF1/IL12B/IL21/ITGB2/KLRC4-KLRK1/LILRB  
 4/LIMS2/MMRN1/MYOC/P2RY12/PTPRC/SFRP1/SFRP2/SMOC2/THY1/VCAM1/VIT/APOA1/BMP7/  
 EPO/FGA/FGB/FGG/FOXA2/HHLA2/HRG/IHH/OLFM4 47

GO:0050670 BP regulation of lymphocyte proliferation 29/1105 202/16241 0.00010665  
0.003796114 0.003041675  
CCL19/CCR2/CD22/CLC/CLEC4G/CLECL1/FCGR2B/FGF10/GPNMB/HLA-DPA1/HLA-DPB1/IGF1  
/IL12B/IL21/LMO1/LRRC32/PLA2G2D/PTPRC/TAC1/TLR9/TNFRSF13B/TNFSF8/VCAM1/VSIG4/EPO  
/HHLA2/IHH/PLA2G2F/SCGB1A1 29

GO:0001655 BP urogenital system development 41/1105 327/16241 0.000109295  
0.003862272 0.003094684  
ACTA2/ADAMTS1/ADIPOQ/AGTR1/AGTR2/AR/COL4A3/COL4A4/CYP7B1/DCN/EMX2/EPHA7/  
FBN1/FGF10/FGF2/FGFR1/GLI2/GLI3/HEY1/IRX1/KIRREL3/MYOC/PDGFRB/PECAM1/SERPINF1/S  
FRP1/SIX2/SLIT2/SULF1/TBX18/TNC/WNT9B/WWTR1/BMP7/HOXA11/HOXB13/HOXD11/OVOL1/  
PCSK9/REN/SALL1 41

GO:0032944 BP regulation of mononuclear cell proliferation 29/1105 203/16241  
0.000116525 0.004088346 0.003275828  
CCL19/CCR2/CD22/CLC/CLEC4G/CLECL1/FCGR2B/FGF10/GPNMB/HLA-DPA1/HLA-DPB1/IGF1  
/IL12B/IL21/LMO1/LRRC32/PLA2G2D/PTPRC/TAC1/TLR9/TNFRSF13B/TNFSF8/VCAM1/VSIG4/EPO  
/HHLA2/IHH/PLA2G2F/SCGB1A1 29

GO:0051271 BP negative regulation of cellular component movement 38/1105 296/16241  
0.000117605 0.004096977 0.003282744  
ADIPOQ/AGTR2/ANGPT4/APOE/CCL21/COL3A1/CXCL12/CXCL13/CYP1B1/DCN/DPYSL3/EMIL  
IN1/FBLN1/FGF2/GREM1/HAS1/IGFBP5/KLRCA-KLRK1/MEOX2/MYOC/NAV3/NRG3/PODN/SERP  
INE1/SERPINF1/SFRP1/SFRP2/SLIT2/SPOCK3/SULF1/THBS1/THY1/TMEFF2/TNN/ADTRP/APOH/HR  
G/SEMG138

GO:0090025 BP regulation of monocyte chemotaxis 8/1105 24/16241 0.000123146  
0.004259825 0.003413228  
CCR2/CXCL12/GREM1/SERPINE1/SLIT2/CXCL17/S100A14/S100A7 8

GO:0019932 BP second-messenger-mediated signaling 50/1105 428/16241 0.000124963  
0.004279855 0.003429277  
ADCY2/ADCY5/ADCYAP1/ADCYAP1R1/ADGRB3/ADGRD1/ADRB3/AGTR1/AGTR2/ANK2/APOE/  
ATP1A2/CASQ1/CASQ2/CCR2/CCR4/CCR7/CCR8/CD22/CMKLR1/CXCL9/EPHA5/GPR26/IGF1/JPH2  
/JPH4/MYOZ2/NPPC/P2RX2/P2RY12/PDE3A/PLN/PTGER3/PTGFR/PTPRC/SELP/SGCD/SLC8A1/THB  
S1/VCAM1/VIP/XCR1/ADGRG7/CCL20/CHP2/DEFB1/HTR2C/NEUROD1/P2RX3/PDZD3 50

GO:0033002 BP muscle cell proliferation 27/1105 184/16241 0.000125563 0.004279855  
0.003429277  
ADAMTS1/ADIPOQ/CNN1/ELANE/ELN/FGF2/FGFR1/IGF1/IGFBP5/IL12B/KCNK2/MMP2/MYO  
CD/NPPC/NPR3/NPY5R/OGN/PDGFRB/RBPMS2/TENM4/TGFB3/THBS1/VIP/VIPR2/ZFPM2/NOX1/  
TERT27

GO:0070663 BP regulation of leukocyte proliferation 30/1105 214/16241 0.000126594  
0.004279855 0.003429277  
CCL19/CCR2/CD22/CLC/CLEC4G/CLECL1/FCGR2B/FGF10/GPNMB/GREM1/HLA-DPA1/HLA-D  
PB1/IGF1/IL12B/IL21/LMO1/LRRC32/PLA2G2D/PTPRC/TAC1/TLR9/TNFRSF13B/TNFSF8/VCAM1/V  
SIG4/EPO/HHLA2/IHH/PLA2G2F/SCGB1A1 30

GO:0010810 BP regulation of cell-substrate adhesion 29/1105 204/16241 0.000127211  
0.004279855 0.003429277  
ABI3BP/CCDC80/CCL21/CCR7/COL1A1/COL8A1/DDR2/EMILIN1/EPHA3/FBLN1/FBLN2/FLNA/

FN1/LIMS2/MMRN1/MYOC/SERPINE1/SFRP1/SMOC2/SPOCK1/THBS1/THY1/VIT/APOA1/FGA/FG  
 B/FGG/HRG/OLFM4 29  
 GO:0040013 BP negative regulation of locomotion 39/1105 309/16241 0.000138468  
 0.004626892 0.003707344  
 ADIPOQ/AGTR2/ANGPT4/APOE/CCL21/COL3A1/CXCL12/CXCL13/CYP1B1/DCN/DPYSL3/ELAN  
 E/EMILIN1/FBLN1/FGF2/GREM1/HAS1/IGFBP5/KLRC4-KLRK1/MEOX2/MYOC/NAV3/NRG3/POD  
 N/SERPINE1/SERPINF1/SFRP1/SFRP2/SLIT2/SPOCK3/SULF1/THBS1/THY1/TMEFF2/TNN/ADTRP/A  
 POH/HRG/SEMG1 39  
 GO:0070371 BP ERK1 and ERK2 cascade 37/1105 288/16241 0.00014164 0.004700921  
 0.00376666  
 ADCYAP1/ADIPOQ/AKAP12/APOE/CCL13/CCL14/CCL19/CCL21/CCR7/CSF1R/EMILIN1/EPHA7  
 /FBLN1/FGF10/FGF2/FLT3/FN1/GPNMB/HAND2/HCTR1/HTR2A/IGF1/NPY5R/PDGFRB/PTPRC/S  
 CIMP/TIMP3/CCL15/CCL20/EPO/FGA/FGB/FGF23/FGG/HTR2C/S100A7/SLC30A10 37  
 GO:0060537 BP muscle tissue development 45/1105 375/16241 0.000145435  
 0.004789619 0.003837731  
 ACTN2/AGTR2/ASB2/BVES/CASQ1/COL11A1/COL19A1/COL3A1/DCN/DKK1/EGR2/ELN/FGF2  
 /FGFR1/FOXP2/GREM1/HEG1/HEY1/IGF1/IGFBP5/JPH2/KCNK2/MEOX2/MYH11/MYL3/MYLK/MY  
 OCD/MYOZ2/P2RX2/PDGFRB/PGM5/PI16/PLN/POPDC2/RBM24/RGS4/SGCD/SGCG/SLC8A1/SMY  
 D1/TENM4/ZFPM2/BMP7/FOXH1/IHH 45  
 GO:0070252 BP actin-mediated cell contraction 19/1105 110/16241 0.000146263  
 0.004789619 0.003837731  
 ACTN2/ANK2/ATP1A2/CACNA1G/CTNNA3/DES/FLNA/FRMD6/KCNA5/KCNE4/KCNJ5/MYL3/P  
 LN/SCN2B/SGCD/TNNT3/TPM2/VIM/MYH4 19  
 GO:0008037 BP cell recognition 23/1105 147/16241 0.000147788 0.004807499  
 0.003852057  
 ADAM21/CCL19/CCL21/CCR7/CNR1/COLEC12/CRTAC1/CRTAM/DSCAML1/EPHA3/FCN1/FOL  
 R2/GAP43/NCAM2/NDN/NTM/PALLD/PECAM1/TNN/TUB/VCAN/FUT3/TEX101 23  
 GO:0030195 BP negative regulation of blood coagulation 12/1105 52/16241 0.000150319  
 0.004855849 0.003890798  
 APOE/KRT1/SERPINE1/SERPING1/THBS1/ADTRP/APOH/F2/FGA/FGB/FGG/HRG 12  
 GO:0050920 BP regulation of chemotaxis 29/1105 206/16241 0.000151251  
 0.004855849 0.003890798  
 ADGRA2/CCL19/CCL21/CCR2/CCR4/CCR7/CMKLR1/CXCL12/CXCL13/ELANE/FGF10/FGF2/FG  
 FR1/GREM1/JAM3/KLRC4-KLRK1/P2RY12/PDGFRB/PLXNA4/SERPINE1/SLIT2/SMOC2/SUCNR1/TH  
 BS1/THBS4/CXCL17/HRG/S100A14/S100A7 29  
 GO:0006720 BP isoprenoid metabolic process 22/1105 138/16241 0.000154687  
 0.004933905 0.003953341  
 ADH1B/APOE/CYP1B1/GPIHBP1/SDC3/ADH7/AKR1B10/AKR1C4/APOA1/APOA2/APOA4/APO  
 C3/CLPS/CYP2C19/CYP3A4/RBP2/TTR/UGT1A1/UGT1A3/UGT1A7/UGT1A8/UGT1A9 22  
 GO:0034113 BP heterotypic cell-cell adhesion 13/1105 60/16241 0.000159809 0.004985011  
 0.003994291  
 ADIPOQ/CTNNA3/ITGAD/ITGB2/NFASC/PTPRC/THY1/VCAM1/APOA1/BMP7/FGA/FGB/FGG  
 13  
 GO:0048645 BP animal organ formation 13/1105 60/16241 0.000159809 0.004985011

0.003994291  
 AR/DKK1/FGF10/FGFR1/GLI2/GLI3/HAND2/NKX3-2/SULF1/BMP7/FOLR1/FOXH1/HOXA11  
 13  
 GO:0050433 BP regulation of catecholamine secretion 13/1105 60/162410.000159809  
 0.004985011 0.003994291  
 AGTR2/CARTPT/CHRNA6/CNR1/CXCL12/HTR2A/KCNA2/KCNB1/P2RY12/SYT11/SYT4/SYT6/VI  
 P 13  
 GO:0098698 BP postsynaptic specialization assembly 7/1105 19/162410.000161327  
 0.004985011 0.003994291 CBLN1/GAP43/LRRTM1/NLGN1/NRXN2/PTPRS/SHANK1 7  
 GO:0051966 BP regulation of synaptic transmission, glutamatergic 14/1105 68/16241  
 0.000161363 0.004985011 0.003994291  
 ADCYAP1/ATP1A2/CACNG7/CCR2/CDH2/CNR1/DKK1/GRIK3/HTR2A/NLGN1/RELN/ROR2/SH  
 ANK1/TNR 14  
 GO:0072001 BP renal system development 37/1105 290/16241 0.00016319  
 0.00500993 0.004014257  
 ACTA2/ADAMTS1/ADIPOQ/AGTR1/AGTR2/COL4A3/COL4A4/DCN/EMX2/EPHA7/FBN1/FGF1  
 O/FGF2/FGFR1/GLI2/GLI3/HEYL/IRX1/KIRREL3/MYOCD/PDGFRB/PECAM1/SERPINF1/SFRP1/SIX2/  
 SLIT2/SULF1/TBX18/WNT9B/WWTR1/BMP7/HOXA11/HOXD11/OVOL1/PCSK9/REN/SALL1 37  
 GO:0032094 BP response to food 10/1105 38/162410.0001666 0.00508285  
 0.004072685 CARTPT/MPO/NPY/SPX/CLPS/CLPSL1/CLPSL2/G6PC/GAST/NPFF 10  
 GO:0045165 BP cell fate commitment 34/1105 259/16241 0.000171637 0.005204208  
 0.004169924  
 AR/DHH/DKK1/DSCAML1/EBF2/FGF10/FGF2/FGFR1/GAP43/GAS1/GLI2/GLI3/IL12B/PRRX1/  
 PTCH2/ROR2/SFRP1/SFRP2/SIX2/TBX18/TENM4/TGFB11/WNT9A/WNT9B/ATOH1/EVX1/FOXA2/  
 FOXN1/HOXA11/IHH/NEUROD1/NKX6-2/NR2E1/POU6F2 34  
 GO:0035265 BP organ growth 26/1105 178/16241 0.000179208 0.00539916  
 0.004326132  
 AGTR2/ANXA6/AR/BNC2/COL14A1/COL6A1/COL6A2/COL6A3/COMP/DDR2/EVC/FGF10/FGF  
 2/FGF7/FGFR1/HEG1/IGF1/KCNK2/NPPC/PDGFRB/PI16/RGS4/RSP02/TENM4/VIT/ZFPM2 26  
 GO:0002027 BP regulation of heart rate 17/1105 94/162410.000181364 0.00539916  
 0.004326132  
 AGTR2/ANK2/BVES/CACNA1G/CASQ2/CTNNA3/KCNA5/KCNE4/KCNJ5/PLN/POPDC2/RGS4/S  
 CN2B/SLC8A1/SPX/TAC1/NPFF 17  
 GO:0043266 BP regulation of potassium ion transport 17/1105 94/162410.000181364  
 0.00539916 0.004326132  
 ACTN2/ADCYAP1/ANK2/CASQ2/DPP6/FHL1/FLNA/HTR2A/KCNA1/KCNA5/KCNE4/KCNIP1/KC  
 NMB1/LRRC38/NETO1/RGS4/VIP 17  
 GO:0051346 BP negative regulation of hydrolase activity 50/1105 435/16241  
 0.000185937 0.005460236 0.004375069  
 A2M/ADCYAP1/CCDC8/COL4A3/COL6A3/CR1/CRYAB/CST2/CST5/HMSD/ITIH5/KLRC4-KLRK1/  
 NGF/NGFR/PI16/PLN/PZP/SERPINA3/SERPINE1/SERPINF1/SERPING1/SFRP2/SLIT2/SPOCK1/SPOC  
 K3/THBS1/TIMP2/TIMP3/TLR9/WNT9A/AMBP/APOA1/APOA2/APOC3/CARD18/CSTL1/FABP1/HR  
 G/MAGEA3/PI3/PPP1R14C/PPP1R14D/PPP1R1B/PPP1R27/R3HDM1/SERPINA10/SERPINB13/SPIN  
 K4/WFDC10A/WFDC12 50

GO:0032963 BP collagen metabolic process 18/1105 103/16241 0.000186062  
0.005460236 0.004375069  
ADAMTS2/COL15A1/COL19A1/COL1A1/COL1A2/COL5A1/EMILIN1/MFAP4/MMP2/MRC2/NP  
PC/PDGFRB/TGFB3/TNXB/VIM/F2/IHH/MMP3 18

GO:0060349 BP bone morphogenesis 19/1105 112/16241 0.000186751 0.005460236  
0.004375069  
ANXA6/COL14A1/COL1A1/COL6A1/COL6A2/COL6A3/COMP/GLI3/NPPC/RIPPLY2/SFRP2/SFR  
P4/TGFB3/TIFAB/TMEM119/VIT/CDX1/HOXA11/IHH 19

GO:0061337 BP cardiac conduction 22/1105 140/16241 0.000191457 0.005544098  
0.004442265  
ABCC9/ANK2/ATP1A2/ATP1A4/ATP2B2/CACNA1G/CACNG7/CASQ1/CASQ2/CTNNA3/FLNA/F  
XYD6/KCNA5/KCNE4/KCNIP1/KCNJ5/KCNK3/NPPC/PLN/SCN2B/SLC8A1/FXYD4 22

GO:0051048 BP negative regulation of secretion 30/1105 219/16241 0.000191876  
0.005544098 0.004442265  
ADIPOQ/AGTR2/APOE/CARTPT/CCR2/CD22/CNR1/FCGR2B/FN1/KCNB1/LRRC32/NPY5R/P2R  
Y12/PTGER3/SFRP1/SPX/SSC5D/SYT11/SYT4/TACR2/TIFAB/TLR8/ADTRP/APOA1/APOA2/CARD18/  
CYP4F2/FGF23/IL36RN/NPFF 30

GO:0042129 BP regulation of T cell proliferation 23/1105 150/16241 0.000201038  
0.005710118 0.004575289  
CCL19/CCR2/CLC/CLEC4G/CLECL1/GPNMB/HLA-DPA1/HLA-DPB1/IGF1/IL12B/IL21/LMO1/LR  
RC32/PLA2G2D/PTPRC/TNFSF8/VCAM1/VSIG4/EPO/HHLA2/IHH/PLA2G2F/SCGB1A1 23

GO:0060351 BP cartilage development involved in endochondral bone morphogenesis  
11/1105 46/162410.00020111 0.005710118 0.004575289  
ANXA6/COL14A1/COL1A1/COL6A1/COL6A2/COL6A3/COMP/NPPC/VIT/HOXA11/IHH 11

GO:0098868 BP bone growth 11/1105 46/162410.00020111 0.005710118 0.004575289  
ANXA6/BNC2/COL14A1/COL6A1/COL6A2/COL6A3/COMP/DDR2/EVC/NPPC/VIT 11

GO:0099084 BP postsynaptic specialization organization 9/1105 32/162410.000203138  
0.005734565 0.004594878  
CBLN1/CDH2/GAP43/LRRTM1/NLGN1/NRXN2/PTPRS/RELN/SHANK1 9

GO:0031960 BP response to corticosteroid 24/1105 160/16241 0.000208022  
0.005838876 0.004678458  
ADCYAP1/ADIPOQ/AGTR2/BCHE/CDO1/CNGA3/COL1A1/CYBB/FLT3/NEFL/SERPINF1/SLIT2/S  
LIT3/SPARC/ABCC2/AGXT/APOA2/CPN1/EPO/HSD3B1/IL22/PCK1/SCGB1A1/UGT1A1 24

GO:0044273 BP sulfur compound catabolic process 12/1105 54/162410.000220222  
0.006089736 0.004879463  
BGN/CDO1/DCN/GADL1/GGT5/KERA/LUM/OGN/OMD/PRELP/VCAN/AGXT 12

GO:0050819 BP negative regulation of coagulation 12/1105 54/162410.000220222  
0.006089736 0.004879463  
APOE/KRT1/SERPINE1/SERPING1/THBS1/ADTRP/APOH/F2/FGA/FGB/FGG/HRG 12

GO:0097485 BP neuron projection guidance 35/1105 273/16241 0.000220679  
0.006089736 0.004879463  
BOC/CSF1R/CXCL12/DPYSL4/DPYSL5/DSCAML1/EGR2/EPHA3/EPHA5/EPHA6/EPHA7/FLRT2/  
GAP43/GFRA1/GFRA2/GLI2/GLI3/LAMA2/NCAM1/NFASC/NRP2/NRXN3/NTN3/NTNG1/PALLD/PL  
XNA4/RELN/RNF165/SLIT2/SLIT3/TNR/ATOH1/BMP7/EFNA2/FEZF1 35

GO:0048247 BP lymphocyte chemotaxis 13/1105 62/162410.000226374 0.006171261  
0.004944785  
CCL13/CCL14/CCL19/CCL21/CCR2/CXCL13/CYP7B1/KLRC4-KLRK1/C10orf99/CCL15/CCL20/D  
EFA1/S100A7 13

GO:0050432 BP catecholamine secretion 13/1105 62/162410.000226374 0.006171261  
0.004944785  
AGTR2/CARTPT/CHRNA6/CNR1/CXCL12/HTR2A/KCNA2/KCNB1/P2RY12/SYT11/SYT4/SYT6/VI  
P 13

GO:1903034 BP regulation of response to wounding 24/1105 161/16241 0.000229042  
0.006171261 0.004944785  
APOE/FGF2/KRT1/MYLK/PTPRS/RGMA/SELP/SERPINE1/SERPING1/SIGLEC10/SMOC2/THBS1  
/TNFR/ADTRP/APOH/DUOX2/F2/FGA/FGB/FGG/FOXA2/HRG/REG3A/REG3G 24

GO:0019722 BP calcium-mediated signaling 29/1105 211/16241 0.000230012  
0.006171261 0.004944785  
AGTR1/ANK2/ATP1A2/CASQ1/CASQ2/CCR2/CCR4/CCR7/CCR8/CD22/CMKLR1/IGF1/JPH2/J  
H4/MYOZ2/P2RX2/P2RY12/PLN/PTGFR/PTPRC/SELP/SGCD/SLC8A1/VCAM1/XCR1/CCL20/CHP2/D  
EFB1/P2RX3 29

GO:0051146 BP striated muscle cell differentiation 34/1105 263/16241 0.000230293  
0.006171261 0.004944785  
ACTN2/ADGRB3/AGTR2/BVES/CASQ1/CASQ2/CDH2/COMP/CXCL9/DKK1/EHD2/FLNC/GREM  
1/IGF1/IGFBP5/LDB3/LMOD1/MYH11/MYOC/D/MyoZ2/P2RX2/PDGFRB/PGM5/PI16/PLEKHO1/P  
OPDC2/RBM24/RGS4/SGCD/SLC8A1/SMYD1/TMEM119/TNNT3/UCHL1 34

GO:0099560 BP synaptic membrane adhesion 8/1105 26/162410.000231499 0.006171261  
0.004944785 LRFN5/LRRC4C/NLGN1/NTNG1/PTPRS/SLITRK2/SLITRK3/SPARCL1 8

GO:0002438 BP acute inflammatory response to antigenic stimulus 7/1105 20/16241  
0.000233684 0.006171261 0.004944785  
ADCYAP1/CCR7/CNR1/ELANE/FCGR2B/NPY5R/NPFF 7

GO:0002577 BP regulation of antigen processing and presentation 7/1105 20/16241  
0.000233684 0.006171261 0.004944785  
CCL19/CCL21/CCR7/FCGR2B/FGL2/HLA-DOA/THBS1 7

GO:0006641 BP triglyceride metabolic process 17/1105 96/162410.000236041  
0.006177178 0.004949526  
APOE/FABP4/APOA1/APOA2/APOA4/APOA5/APOBEC1/APOC3/APOH/FABP1/FABP2/FABP6/  
G6PC/MOGAT2/MOGAT3/PCK1/PCSK9 17

GO:0032496 BP response to lipopolysaccharide 39/1105 317/16241 0.000236423  
0.006177178 0.004949526  
AKAP12/AXL/BPI/CCR7/CEBPE/CNR1/CTSG/CXCL13/CXCL9/DCN/ELANE/FGF10/FMO1/IL10R  
A/IL12B/KLRC4-KLRK1/MPO/MRC1/PENK/PTGFR/SELP/SERPINE1/SPARC/TAC1/VCAM1/VIM/ABC  
C2/DEFA1/EPO/IL36G/IL36RN/IL37/LCN2/PCK1/REN/S100A14/S100A7/SCGB1A1/UGT1A1 39

GO:0060402 BP calcium ion transport into cytosol 23/1105 152/16241 0.000245348  
0.006329176 0.005071316  
ADCYAP1R1/ANK2/ATP1A2/CASQ1/CASQ2/CCL19/CCL21/CCR7/CXCL9/FGF2/HTR2A/JPH2/J  
H4/MS4A1/P2RX2/PLN/PTPRC/SLC8A1/THY1/EPO/F2/HTR2C/P2RX3 23

GO:0021675 BP nerve development 15/1105 79/162410.000246106 0.006329176

0.005071316  
 COL25A1/EGR2/GABRA5/GLI3/KCNA2/NGF/NPTX1/NRP2/PHOX2A/PLXNA4/RNF165/SULF1/  
 TIFAB/VCAM1/SALL1 15  
 GO:1900046 BP regulation of hemostasis 15/1105 79/162410.000246106 0.006329176  
 0.005071316  
 APOE/COMP/KRT1/SELP/SERPINE1/SERPING1/THBS1/ADTRP/APOH/F2/FGA/FGB/FGG/FOXA  
 2/HRG 15  
 GO:0022407 BP regulation of cell-cell adhesion 45/1105 384/16241 0.000249373  
 0.006379789 0.00511187  
 ADIPOQ/CCL19/CCL21/CCR2/CCR7/CLEC4G/CLECL1/CXCL12/CXCL13/ELANE/EPHA7/FCGR2B  
 /FGL2/GLI2/GLI3/GPNMB/HLA-DPA1/HLA-DPB1/IGF1/IL12B/IL21/ITGB2/KLRC4-KLRK1/LILRB4/LR  
 RC32/PLA2G2D/PTPRC/TENM3/THY1/TNR/VCAM1/VSIG4/ADTRP/APOA1/BMP7/EPO/FGA/FGB/F  
 GG/FOXA2/HHLA2/IHH/MUC21/PLA2G2F/SCGB1A1 45  
 GO:1901654 BP response to ketone 27/1105 192/16241 0.00025631 0.006523298  
 0.005226858  
 ADCY2/ADCY5/AGTR2/AR/CCL19/CCL21/CCR7/CYBB/FOXP2/NEFL/PLN/PTGDR/PTGFR/SERPI  
 NF1/SFRP1/SLIT2/SLIT3/SOX10/TGFB3/THBS1/TNC/ABCC2/DSG1/EPO/HOXB13/HSD3B1/PCK1  
 27  
 GO:0010955 BP negative regulation of protein processing 10/1105 40/162410.000263766  
 0.006628041 0.005310785  
 A2M/CR1/GAS1/SERPINE1/SERPING1/THBS1/VSIG4/C4BPB/CARD18/MAGEA3 10  
 GO:1903318 BP negative regulation of protein maturation 10/1105 40/162410.000263766  
 0.006628041 0.005310785  
 A2M/CR1/GAS1/SERPINE1/SERPING1/THBS1/VSIG4/C4BPB/CARD18/MAGEA3 10  
 GO:0031102 BP neuron projection regeneration 12/1105 55/162410.000264474  
 0.006628041 0.005310785  
 GAP43/JAM3/MAG/NEFL/PRRX1/PTPRS/RGMA/THY1/TNC/TNR/APOA1/FOLR1 12  
 GO:0022600 BP digestive system process 17/1105 97/162410.000268388 0.006631733  
 0.005313743  
 FGF10/NPR3/PTGER3/SERPINA3/TAC1/TIFAB/TLR9/APOA1/APOA2/APOA4/APOA5/CEL/FABP  
 1/FABP2/MOGAT2/MUC4/NEUROD1 17  
 GO:0030595 BP leukocyte chemotaxis 29/1105 213/16241 0.000270577 0.006631733  
 0.005313743  
 CCL13/CCL14/CCL19/CCL21/CCR2/CCR7/CMKLR1/CXCL12/CXCL13/CXCL9/CYP7B1/GREM1/IT  
 GB2/JAM3/KLRC4-KLRK1/SERPINE1/SLIT2/THBS1/THBS4/C10orf99/CCL15/CCL20/CXCL17/DEFA1/  
 IL36G/IL36RN/IL37/S100A14/S100A7 29  
 GO:0051918 BP negative regulation of fibrinolysis 5/1105 10/162410.000272722  
 0.006631733 0.005313743 SERPINE1/THBS1/APOH/F2/HRG 5  
 GO:0060513 BP prostatic bud formation 5/1105 10/162410.000272722 0.006631733  
 0.005313743 AR/FGF10/GLI2/SULF1/BMP7 5  
 GO:0097048 BP dendritic cell apoptotic process 5/1105 10/162410.000272722  
 0.006631733 0.005313743 AXL/CCL19/CCL21/CCR7/CXCL12 5  
 GO:2000668 BP regulation of dendritic cell apoptotic process 5/1105 10/16241  
 0.000272722 0.006631733 0.005313743 AXL/CCL19/CCL21/CCR7/CXCL12 5

GO:0043542 BP endothelial cell migration 27/1105 193/16241 0.000279141  
0.006754378 0.005412014  
ADGRA2/AGTR2/AKT3/ANGPT4/APOE/CXCL13/CYP1B1/DCN/FGF2/FGFR1/GREM1/ITGB2/M  
EOX2/NRP2/PECAM1/SERPINF1/SLIT2/SMOC2/SPARC/THBS1/ADTRP/APOA1/APOH/FGFBP1/HRG  
/NR2E1/PRSS327

GO:0034433 BP steroid esterification 6/1105 15/162410.000287064 0.006811875  
0.005458084 AGTR1/APOE/APOA1/APOA2/APOA4/APOA5 6

GO:0034434 BP sterol esterification 6/1105 15/162410.000287064 0.006811875  
0.005458084 AGTR1/APOE/APOA1/APOA2/APOA4/APOA5 6

GO:0034435 BP cholesterol esterification 6/1105 15/162410.000287064 0.006811875  
0.005458084 AGTR1/APOE/APOA1/APOA2/APOA4/APOA5 6

GO:0043031 BP negative regulation of macrophage activation 6/1105 15/16241  
0.000287064 0.006811875 0.005458084 BPI/FCGR2B/IL31RA/LRFN5/PTPRC/VSIG4 6

GO:0030850 BP prostate gland development 11/1105 48/162410.000300503 0.007061861  
0.005658387 AR/CYP7B1/FGF10/GLI2/GLI3/SERPINF1/SFRP1/SULF1/TNC/BMP7/HOXB13  
11

GO:0071825 BP protein-lipid complex subunit organization 11/1105 48/162410.000300503  
0.007061861 0.005658387  
AGTR1/APOE/GPIHBP1/MPO/PCDHGA3/APOA1/APOA2/APOA4/APOA5/APOC3/MTTP 11

GO:0019226 BP transmission of nerve impulse 14/1105 72/162410.000303349  
0.007061861 0.005658387  
CACNA1G/CACNG7/CARTPT/GPR88/JAM3/KCNA1/KCNA2/MAG/NFASC/NTRK2/SCN11A/SCN  
7A/TNR/P2RX3 14

GO:0048678 BP response to axon injury 14/1105 72/162410.000303349 0.007061861  
0.005658387  
DPYSL3/GAP43/JAM3/KCNK2/MAG/NEFL/P2RY12/PTPRS/RGMA/TNC/TNR/APOA1/EPO/FOL  
R1 14

GO:0007159 BP leukocyte cell-cell adhesion 39/1105 321/16241 0.000305685  
0.007082675 0.005675065  
ADD2/CCL19/CCL21/CCR2/CCR7/CERCAM/CLEC4G/CLECL1/CXCL12/ELANE/FCGR2B/FGL2/G  
LI2/GLI3/GPNMB/HLA-DPA1/HLA-DPB1/IGF1/IL12B/IL21/ITGB2/KLRK4-KLRK1/LILRB4/LRRC32/PE  
CAM1/PLA2G2D/PTPRC/SELP/THY1/VCAM1/VSIG4/ADTRP/APOA4/BMP7/EPO/HHLA2/IHH/PLA2  
G2F/SCGB1A1 39

GO:0001508 BP action potential 20/1105 126/16241 0.000321196 0.007407119  
0.005935029  
ANK2/ATP1A2/CACNA1G/CNR1/CTNNA3/FLNA/GPR88/KCNA1/KCNA2/KCNA5/KCNB1/KCNE  
4/KCNJ5/NTRK2/SCN11A/SCN2B/SCN7A/SLC8A1/TAC1/P2RX3 20

GO:0045668 BP negative regulation of osteoblast differentiation 10/1105 41/16241  
0.000327822 0.007524597 0.006029159  
GDF10/GREM1/HAND2/IGFBP5/RANBP3L/RORB/SFRP1/TNN/TWIST2/FGF23 10

GO:0048736 BP appendage development 25/1105 175/16241 0.000334894  
0.00761573 0.006102181  
AFF3/COMP/DKK1/EN1/FGF10/FGFR1/GDF5/GLI2/GLI3/GREM1/HAND2/MEOX2/PRRX1/RN  
F165/ROR2/RSPO2/SFRP2/WNT9A/BMP7/FOXP1/HOXA11/HOXC13/IHH/SALL1/SP825

GO:0060173 BP limb development 25/1105 175/16241 0.000334894 0.00761573  
0.006102181  
AFF3/COMP/DKK1/EN1/FGF10/FGFR1/GDF5/GLI2/GLI3/GREM1/HAND2/MEOX2/PRRX1/RN  
F165/ROR2/RSP02/SFRP2/WNT9A/BMP7/FOXP1/HOXA11/HOXC13/IHH/SALL1/SP825

GO:0070661 BP leukocyte proliferation 36/1105 290/16241 0.00033992 0.007694407  
0.006165221  
CCL19/CCR2/CD22/CLC/CLEC4G/CLECL1/CR2/CSF1R/FCGR2B/FGF10/FLT3/GAPT/GPNMB/GR  
EM1/HLA-DPA1/HLA-DPB1/IGF1/IL12B/IL21/LMO1/LRRC32/MS4A1/NPR3/PLA2G2D/PTPRC/TAC1  
/TLR9/TNFRSF13B/TNFSF8/VCAM1/VSIG4/EPO/HHLA2/IHH/PLA2G2F/SCGB1A1 36

GO:0050900 BP leukocyte migration 48/1105 424/16241 0.000352411 0.007940554  
0.006362449  
ADD2/ANGPT4/CCL13/CCL14/CCL19/CCL21/CCR2/CCR7/CMKLR1/COL1A1/COL1A2/CXCL12/  
CXCL13/CXCL9/CYP7B1/ELANE/EMILIN1/FN1/GREM1/GYPC/ITGB2/JAM3/KLR4-KLRK1/MAG/P2  
RY12/PECAM1/ROR2/SDC3/SELP/SERPINE1/SLIT2/THBS1/THBS4/THY1/VCAM1/ADTRP/C10orf99/  
CCL15/CCL20/CXCL17/DEFA1/F2/IL17A/IL36G/IL36RN/IL37/S100A14/S100A7 48

GO:0003018 BP vascular process in circulatory system 24/1105 166/16241 0.000364845  
0.00816523 0.006542473  
ACTA2/ADCYAP1/ADRB3/AGTR1/AGTR2/AKAP12/APOE/ATP1A2/COMP/EDNRA/HTR2A/HTR7  
/KCNA5/KCNMA1/KCNMB1/NPPC/PDE3A/SLC8A1/SLIT2/TACR2/VIP/FGA/FGB/FGG 24

GO:0008217 BP regulation of blood pressure 25/1105 176/16241 0.000365707  
0.00816523 0.006542473  
ACTA2/ADIPOQ/ADRB3/AGTR1/AGTR2/AR/ATP1A2/CARTPT/CMA1/CNR1/COL1A2/CTSG/ED  
NRA/NPR3/NPY/NPY1R/P2RX2/SPX/SUCNR1/TAC1/TAC4/CYP4F2/NOX1/NPFF/REN 25

GO:0007160 BP cell-matrix adhesion 29/1105 217/16241 0.0003712 0.008250384  
0.006610704  
ACTN2/CCL21/CCR7/COL3A1/DDR2/EMILIN1/EPHA3/FBLN5/FERMT2/FN1/ITGA11/ITGB2/IT  
GBL1/JAM3/MYOC/PECAM1/SERPINE1/SFRP1/SIGLEC1/SORBS1/THBS1/THY1/TNN/VCAM1/FGA/  
FGB/FGG/HRG/MUC4 29

GO:0035150 BP regulation of tube size 21/1105 138/16241 0.000414955 0.009161602  
0.007340826  
ACTA2/ADCYAP1/ADRB3/AGTR1/AGTR2/APOE/ATP1A2/COMP/EDNRA/HTR2A/HTR7/KCNA5/  
KCNMA1/KCNMB1/NPPC/SLC8A1/VIP/WNT9B/FGA/FGB/FGG 21

GO:0042692 BP muscle cell differentiation 40/1105 337/16241 0.000415928  
0.009161602 0.007340826  
ACTN2/ADGRB3/AGTR2/ANK2/BOC/BVES/CASQ1/CASQ2/CDH2/COMP/CXCL9/DKK1/EHD2/F  
GF10/FLNC/GREM1/IGF1/IGFBP5/LDB3/LMOD1/MYH11/MYOC/MYOZ2/P2RX2/PDGFRB/PGM5/  
PI16/PLEKHO1/POPDC2/QKI/RBM24/RBPMS2/RGS4/SGCD/SLC8A1/SMYD1/SYNE1/TMEM119/TN  
NT3/UCHL1 40

GO:0019433 BP triglyceride catabolic process 9/1105 35/16241 0.000425027 0.009320232  
0.00746793 APOE/FABP4/APOA1/APOA4/APOA5/APOC3/FABP1/FABP2/FABP6 9

GO:0050866 BP negative regulation of cell activation 26/1105 188/16241 0.000430059  
0.009368762 0.007506815  
APOE/AXL/BPI/CCR2/CLEC4G/CNR1/EMILIN1/FCGR2B/FGL2/GLI3/GPNMB/IL31RA/LRFN5/LR  
RC32/PLA2G2D/PTPRC/SFRP1/TNFRSF13B/VSIG4/F2/FGG/IHH/PGLYRP3/PGLYRP4/PLA2G2F/SCG

B1A1 26

GO:0007411 BP axon guidance 34/1105 272/16241 0.000432134 0.009368762

0.007506815

BOC/CSF1R/CXCL12/DPYSL5/DSCAML1/EGR2/EPHA3/EPHA5/EPHA6/EPHA7/FLRT2/GAP43/GFRA1/GFRA2/GLI2/GLI3/LAMA2/NCAM1/NFASC/NRP2/NRXN3/NTN3/NTNG1/PALLD/PLXNA4/RELN/RNF165/SLIT2/SLIT3/TNR/ATOH1/BMP7/EFNA2/FEZF134

GO:0045414 BP regulation of interleukin-8 biosynthetic process 6/1105 16/16241

0.000432962 0.009368762 0.007506815 ELANE/TLR7/TLR8/TLR9/APOA2/IL17F 6

GO:0007218 BP neuropeptide signaling pathway 17/1105 101/16241 0.000439297

0.009464148 0.007583244

ADCYAP1/CARTPT/GPR1/GRP/GRPR/HCRTR1/NPY/NPY1R/NPY5R/NXP3/PENK/PNOC/SORCS1/SORCS2/SORCS3/TAC1/NPFF 17

GO:0051051 BP negative regulation of transport 51/1105 463/16241 0.000447615

0.009601243 0.007693092

ACTN2/ADCYAP1/ADIPOQ/AGTR2/APOE/ATP1A2/CARTPT/CASQ2/CCR2/CD22/CNR1/CRYAB/EPHA3/FCGR2B/FN1/GNAO1/HTR2A/KCNB1/KCNE4/LRRC32/LRRTM1/NPY5R/P2RY12/PLN/PRKB/PTGER3/RGS4/SFRP1/SFRP4/SPX/SSC5D/SYT11/SYT4/TACR2/THBS1/TIFAB/TLR8/TLR9/VIP/ADTRP/APOA1/APOA2/APOC3/CARD18/CYP4F2/EPO/FGF23/IL36RN/NPFF/PCSK9/SEMG1 51

GO:0033622 BP integrin activation 7/1105 22/16241 0.000455839 0.009735145

0.007800383 CXCL12/CXCL13/FERMT2/FN1/P2RY12/SELP/CDH17 7

GO:0051283 BP negative regulation of sequestering of calcium ion 19/1105 120/16241

0.000463297 0.009851583 0.00789368

ANK2/ANXA6/ATP1A2/CASQ1/CASQ2/CCL19/CCL21/CCR7/CXCL9/FGF2/HTR2A/JPH2/JPH4/PLN/PTPRC/SLC8A1/THY1/F2/HTR2C 19

GO:0051937 BP catecholamine transport 14/1105 75/16241 0.000470372 0.009865828

0.007905094

AGTR2/CARTPT/CHRNA6/CNR1/CXCL12/HTR2A/KCNA2/KCNB1/P2RY12/SLC6A2/SYT11/SYT4/SYT6/VIP 14

GO:0002923 BP regulation of humoral immune response mediated by circulating immunoglobulin 5/1105 11/16241 0.000472001 0.009865828 0.007905094

CR1/FCER2/FCGR2B/PTPRC/C4BPB 5

GO:0010459 BP negative regulation of heart rate 5/1105 11/16241 0.000472001

0.009865828 0.007905094 AGTR2/PLN/SPX/TAC1/NPFF 5

GO:0052697 BP xenobiotic glucuronidation 5/1105 11/16241 0.000472001 0.009865828

0.007905094 UGT1A1/UGT1A3/UGT1A7/UGT1A8/UGT1A9 5

GO:0048469 BP cell maturation 24/1105 169/16241 0.00047662 0.009920168

0.007948634

ADGRB3/AXL/C1QA/CCL19/CCL21/DAZL/FGFR1/IL21/MYOC/NFASC/NPPC/PDE3A/SOX10/TRIM58/DEFB1/EPO/FGG/HOXB13/IHH/REN/SEMG1/SIX3/SLC26A3/TDRD5 24

GO:0002791 BP regulation of peptide secretion 52/1105 476/16241 0.000480449

0.009957664 0.007978679

ADCY5/ADCYAP1/AGTR2/AKAP12/APOE/BLK/C1QTNF4/CARTPT/CCL19/CCR7/CD22/CLEC6A/CLEC9A/CNR1/CRTAM/CSF1R/EPHA5/FCGR2B/FCN1/FN1/GRP/IGF1/KCNA5/KCNB1/LRRC32/SFRP1/SSC5D/SYT11/SYT4/TGFB3/TLR8/TLR9/ADTRP/APOA1/APOA2/CARD18/FGA/FGB/FGG/FOXA2/

HTR2C/IL17A/IL17F/IL36RN/KISS1/KRT20/NEUROD1/NPFF/ORM1/ORM2/RFX6/TFR2 52  
GO:0046461 BP neutral lipid catabolic process 10/1105 43/162410.000495158  
0.010176646 0.00815414  
APOE/FABP4/APOA1/APOA2/APOA4/APOA5/APOC3/FABP1/FABP2/FABP6 10  
GO:0046464 BP acylglycerol catabolic process 10/1105 43/162410.000495158 0.010176646  
0.00815414 APOE/FABP4/APOA1/APOA2/APOA4/APOA5/APOC3/FABP1/FABP2/FABP6 10  
GO:0050805 BP negative regulation of synaptic transmission 13/1105 67/162410.000503793  
0.010310958 0.008261759  
ADIPOQ/BCHE/CBLN1/GRIA1/GRIK3/HTR2A/KCNB1/NPY5R/SORCS2/SORCS3/SYT11/SYT4/T  
NR 13  
GO:0050769 BP positive regulation of neurogenesis 50/1105 454/16241 0.000509069  
0.010375718 0.008313649  
ADCYAP1/ALK/APOE/BRINP3/CACNG7/CCR2/CHODL/CNR1/CNTN1/CXCL12/DKK1/DPYSL3/E  
PHA3/FGFR1/FLNA/FN1/GDF5/GDF6/GLI2/GLI3/HEYL/MAG/NAP1L2/NEFL/NGF/NGFR/NLGN1/N  
TRK2/P2RY12/PLXNA4/RELN/SERPINF1/SHANK1/SLIT2/SOX10/STMN2/SYT4/TENM3/TENM4/TIM  
P2/ZEB2/ATOH1/BMP7/CRX/EPO/FEZF1/NEUROD1/NKX6-2/RASSF10/REG1A 50  
GO:0051282 BP regulation of sequestering of calcium ion 19/1105 121/16241  
0.000515285 0.010459016 0.008380392  
ANK2/ANXA6/ATP1A2/CASQ1/CASQ2/CCL19/CCL21/CCR7/CXCL9/FGF2/HTR2A/JPH2/JPH4/P  
LN/PTPRC/SLC8A1/THY1/F2/HTR2C 19  
GO:0055078 BP sodium ion homeostasis 11/1105 51/162410.000525018 0.010612709  
0.00850354  
AGTR1/AGTR2/ATP1A2/ATP1A4/C7/SCN7A/SLC12A3/SLC8A1/SPX/TAC1/CYP4F2 11  
GO:0001822 BP kidney development 34/1105 275/16241 0.000527997 0.010629189  
0.008516745  
ACTA2/ADAMTS1/ADIPOQ/AGTR1/AGTR2/COL4A3/COL4A4/DCN/EPHA7/FBN1/FGF10/FGF2  
/FGFR1/GLI2/GLI3/HEYL/IRX1/KIRREL3/PDGFRB/PECAM1/SERPINF1/SFRP1/SIX2/SLIT2/SULF1/W  
NT9B/WWTR1/BMP7/HOXA11/HOXD11/OVOL1/PCSK9/REN/SALL1 34  
GO:0070268 BP cornification 18/1105 112/16241 0.000538434 0.010795044  
0.008649638  
FLG/KRT1/DSG1/DSG4/KLK12/KRT12/KRT13/KRT15/KRT20/KRT4/KRT6B/KRT78/PI3/SPRR2A  
/SPRR2D/SPRR2E/SPRR2F/SPRR2G18  
GO:0051963 BP regulation of synapse assembly 17/1105 103/16241 0.000555352  
0.011065551 0.008866384  
ADGRB3/CBLN1/DKK1/EPHA7/FLRT2/GAP43/LRFN5/LRRTM1/NLGN1/NTRK2/PTPRS/SLITRK2  
/SLITRK3/SLITRK4/SLITRK5/SYNDIG1/THBS2 17  
GO:0007612 BP learning 21/1105 141/16241 0.000556431 0.011065551 0.008866384  
ADGRB3/ATP1A2/BCHE/DKK1/EN1/FOXP2/GABRA5/GPR88/JPH4/MAP1A/NETO1/NRXN2/N  
RXN3/NTRK2/RELN/SHANK1/SORCS3/TAC1/TACR2/TNR/PPP1R1B 21  
GO:0060191 BP regulation of lipase activity 16/1105 94/162410.000563502 0.011160981  
0.008942849  
ADCYAP1R1/AGTR1/EDNRA/FGF2/FGFR1/GPIHBP1/HTR2A/NTRK2/P2RY12/PDGFRB/APOA1/  
APOA2/APOA4/APOA5/APOC3/APOH 16  
GO:0050890 BP cognition 35/1105 287/16241 0.000567998 0.011204836 0.008977988

ADGRB3/APOE/ATP1A2/BCHE/CNR1/DKK1/EGR2/EN1/FOXP2/GABRA5/GPR88/GRIA1/GRPR/HTR2A/JPH4/KCNK2/KCNK4/MAP1A/NETO1/NGF/NRXN2/NRXN3/NTRK2/RELN/SERPINF1/SHANK1/SORCS3/SYT4/TAC1/TACR2/TIFAB/TNR/VIP/KCNK10/PPP1R1B 35  
GO:0045995 BP regulation of embryonic development 19/1105 122/16241 0.000572244 0.01124346 0.009008935

ADIPOQ/AR/COL5A1/DKK1/FGFR1/IGF1/LAMA2/NRK/SFRP1/SFRP2/SULF1/TBX18/TENM4/APOA1/BMP7/CDX1/CDX2/FOXA2/GRHL3 19  
GO:0045666 BP positive regulation of neuron differentiation 41/1105 354/16241 0.000585507 0.011393515 0.009129169

ADCYAP1/ALK/APOE/BRINP3/CACNG7/CHODL/CNR1/CNTN1/CXCL12/DKK1/DPYSL3/EPHA3/FGFR1/FN1/GDF5/GDF6/GLI2/HEYL/NAP1L2/NEFL/NGF/NGFR/NLGN1/NTRK2/PLXNA4/RELN/SERPINF1/SHANK1/SLIT2/STMN2/SYT4/TENM3/TIMP2/ZEB2/ATOH1/BMP7/CRX/EPO/FEZF1/NEUROD1/REG1A 41  
GO:0046651 BP lymphocyte proliferation 33/1105 266/16241 0.000595906 0.011393515 0.009129169

CCL19/CCR2/CD22/CLC/CLEC4G/CLECL1/CR2/FCGR2B/FGF10/FLT3/GAPT/GPNMB/HLA-DPA1/HLA-DPB1/IGF1/IL12B/IL21/LMO1/LRRC32/MS4A1/PLA2G2D/PTPRC/TAC1/TLR9/TNFRSF13B/TNFSF8/VCAM1/VSIG4/EPO/HHLA2/IHH/PLA2G2F/SCGB1A1 33  
GO:0030048 BP actin filament-based movement 20/1105 132/16241 0.000596492 0.011393515 0.009129169

ACTN2/ANK2/ATP1A2/CACNA1G/CTNNA3/DES/FLNA/FRMD6/KCNA5/KCNE4/KCNJ5/MYL3/PN/SCN2B/SGCD/TNNT3/TPM2/VIM/WIPF1/MYH4 20  
GO:0048565 BP digestive tract development 20/1105 132/16241 0.000596492 0.011393515 0.009129169

CLMP/COL3A1/DACT1/FGF10/GLI2/GLI3/MYOC/NKX3-2/NPY/RBPMS2/SFRP1/SFRP2/SIX2/SOX10/TGFB3/CDX2/IHH/OTC/REG1A/SALL120  
GO:0001101 BP response to acid chemical 39/1105 332/16241 0.00059866 0.011393515 0.009129169

ADIPOQ/BCHE/BRINP3/CCL19/CCL21/CCR7/CDO1/COL1A1/COL1A2/COL3A1/COL6A1/CPEB1/CYBB/DKK1/EPHA3/FOLR2/KCNK4/KCNMB1/MMP2/NTRK2/PDGFRB/PTGDR/PTGFR/RORB/RXRG/SERPINF1/SFRP1/SPARC/TNC/WNT9A/WNT9B/ABCC2/AKR1C4/FOLR1/OTC/PCK1/REG1A/SCGB1A1/TRIML2 39  
GO:0001667 BP ameboidal-type cell migration 43/1105 377/16241 0.000599858 0.011393515 0.009129169

ADGRA2/AGTR2/AKAP12/AKT3/ANGPT4/ANXA6/APOE/CXCL13/CYP1B1/DCN/DDR2/FGF10/FGF2/FGF7/FGFR1/FN1/GREM1/HAND2/HAS1/ITGB2/MEOX2/NRP2/P2RY12/PECAM1/SERPINF1/SLC8A1/SLIT2/SMOC2/SOX10/SPARC/TAC1/THBS1/TNS1/ZEB2/ADTRP/APOA1/APOH/BMP7/FGFBP1/FOLR1/HRG/NR2E1/PRSS3 43  
GO:0071675 BP regulation of mononuclear cell migration 10/1105 44/16241 0.000602244 0.011393515 0.009129169

CCR2/CMKLR1/CXCL12/GREM1/SERPINE1/SLIT2/THBS1/CXCL17/S100A14/S100A7 10  
GO:0071827 BP plasma lipoprotein particle organization 10/1105 44/16241 0.000602244 0.011393515 0.009129169

AGTR1/APOE/GPIHBP1/MPO/APOA1/APOA2/APOA4/APOA5/APOC3/MTTP 10

GO:0032102 BP negative regulation of response to external stimulus 38/1105 321/16241  
0.000603077 0.011393515 0.009129169  
ADCYAP1/ADIPOQ/APOE/CARTPT/CXCL13/ELANE/FCGR2B/FGF2/FGL2/GREM1/IGF1/IL12B/K  
LRC4-KLRK1/KRT1/LRFN5/NPY5R/PTGIS/PTPRC/PTPRS/RGMA/SERPINE1/SERPINF1/SERPING1/SIG  
LEC10/SLIT2/SPX/THBS1/TNR/ADTRP/APOA1/APOH/CXCL17/F2/FGA/FGB/FGG/HRG/NPFF 38  
GO:1904062 BP regulation of cation transmembrane transport 38/1105 321/16241  
0.000603077 0.011393515 0.009129169  
ACTN2/ANK2/ATP1A2/CACNG7/CASQ1/CASQ2/CCR2/CXCL9/DPP6/FGF14/FHL1/FLNA/FXYD  
6/GRIA1/JPH2/JPH4/KCNA1/KCNE4/KCNIP1/KCNMB1/LRRC38/NEFL/NETO1/NLGN1/PLN/RELN/R  
GS4/SCN2B/SHANK1/SHISA8/SLC8A1/STAC/THY1/TLR9/EPO/F2/FXYD4/PCSK9 38  
GO:0061138 BP morphogenesis of a branching epithelium 25/1105 182/16241  
0.000608475 0.011451444 0.009175585  
AGTR2/AR/EDNRA/FGF10/FGF2/FGF7/FGFR1/GLI2/GLI3/RSP02/RSP03/SFRP1/SFRP2/SIX2/S  
LIT2/SOX10/SULF1/TNC/WNT9B/BMP7/HOXA11/HOXB13/HOXD11/IHH/SALL1 25  
GO:0006027 BP glycosaminoglycan catabolic process 12/1105 60/162410.000615849  
0.011458525 0.009181258  
BGN/DCN/FGF2/KERA/LUM/OGN/OMD/PRELP/SDC3/VCAN/PGLYRP3/PGLYRP412  
GO:0031640 BP killing of cells of other organism 12/1105 60/162410.000615849  
0.011458525 0.009181258  
CCL13/CTSG/ELANE/FCER2/DEFA1/DEFB4A/F2/HRG/PGLYRP3/PGLYRP4/REG3G/SEMG1 12  
GO:0044364 BP disruption of cells of other organism 12/1105 60/162410.000615849  
0.011458525 0.009181258  
CCL13/CTSG/ELANE/FCER2/DEFA1/DEFB4A/F2/HRG/PGLYRP3/PGLYRP4/REG3G/SEMG1 12  
GO:0060401 BP cytosolic calcium ion transport 23/1105 162/16241 0.000621458  
0.011475937 0.00919521  
ADCYAP1R1/ANK2/ATP1A2/CASQ1/CASQ2/CCL19/CCL21/CCR7/CXCL9/FGF2/HTR2A/JPH2/JPH  
H4/MS4A1/P2RX2/PLN/PTPRC/SLC8A1/THY1/EPO/F2/HTR2C/P2RX3 23  
GO:0090303 BP positive regulation of wound healing 11/1105 52/162410.000625547  
0.011475937 0.00919521  
MYLK/SELP/SERPINE1/SMOC2/THBS1/APOH/DUOX2/F2/HRG/REG3A/REG3G 11  
GO:0090092 BP regulation of transmembrane receptor protein serine/threonine kinase  
signaling pathway 29/1105 224/16241 0.00062858 0.011475937 0.00919521  
ASPEN/CHRD1/CILP/DKK1/EMILIN1/FBN1/FGF10/FSTL1/GDF10/GDF5/GDF6/GREM1/GREM2  
/HTRA3/LTBP1/MYOC/RBPMS2/RNF165/SFRP1/SFRP2/SFRP4/SULF1/TGFB1I1/TGFB3/THBS1/W  
WTR1/BMP7/FOLR1/IL17F 29  
GO:0042228 BP interleukin-8 biosynthetic process 6/1105 17/162410.000630803  
0.011475937 0.00919521 ELANE/TLR7/TLR8/TLR9/APOA2/IL17F 6  
GO:0098856 BP intestinal lipid absorption 6/1105 17/162410.000630803 0.011475937  
0.00919521 APOA1/APOA2/APOA4/APOA5/CEL/FABP2 6  
GO:1901317 BP regulation of flagellated sperm motility 6/1105 17/162410.000630803  
0.011475937 0.00919521 TAC4/TACR1/TACR2/DEFB1/SEMG1/TEX101 6  
GO:0048545 BP response to steroid hormone 43/1105 378/16241 0.000633627  
0.011484777 0.009202293  
ADCYAP1/ADIPOQ/AGTR2/AR/ATP1A2/BCHE/CDO1/CNGA3/COL1A1/CYBB/CYP7B1/FLT3/HE

YL/NEFL/RORB/RXRG/SERPINF1/SFRP1/SLIT2/SLIT3/SOX10/SPARC/TGFB1I1/TGFB3/THBS1/ABCC2  
/ADTRP/AGXT/APOA2/BMP7/CPN1/DEFA1/DSG1/EPO/FOXH1/HSD3B1/IL22/NR1I2/NR2E1/PCK1/  
SCGB1A1/SCGB2A1/UGT1A1 43

GO:0061041 BP regulation of wound healing 20/1105 133/16241 0.000658172

0.011885811 0.009523626

APOE/FGF2/KRT1/MYLK/SELP/SERPINE1/SERPING1/SMOC2/THBS1/ADTRP/APOH/DUOX2/F2  
/FGA/FGB/FGG/FOXA2/HRG/REG3A/REG3G 20

GO:0007416 BP synapse assembly 24/1105 173/16241 0.000671602 0.012059193

0.00966255

ADD2/ADGRB3/CBLN1/CDH2/DKK1/EPHA7/FLRT2/GAP43/GPM6A/KIRREL3/LRFN5/LRRTM1  
/NLGN1/NRXN2/NTRK2/PTPRS/SHANK1/SLITRK2/SLITRK3/SLITRK4/SLITRK5/SYNDIG1/THBS2/CEL  
24

GO:0003413 BP chondrocyte differentiation involved in endochondral bone morphogenesis

8/1105 30/162410.000679726 0.012059193 0.00966255

ANXA6/COL14A1/COL6A1/COL6A2/COL6A3/NPPC/VIT/IHH 8

GO:0048265 BP response to pain 8/1105 30/162410.000679726 0.012059193

0.00966255 P2RX2/RELN/SLC6A2/TAC1/TACR1/THBS1/THBS4/P2RX3 8

GO:0097106 BP postsynaptic density organization 8/1105 30/162410.000679726

0.012059193 0.00966255 CBLN1/CDH2/LRRTM1/NLGN1/NRXN2/PTPRS/RELN/SHANK1  
8

GO:0032943 BP mononuclear cell proliferation 33/1105 268/16241 0.000680048

0.012059193 0.00966255

CCL19/CCR2/CD22/CLC/CLEC4G/CLECL1/CR2/FCGR2B/FGF10/FLT3/GAPT/GPNMB/HLA-DPA1  
/HLA-DPB1/IGF1/IL12B/IL21/LMO1/LRRC32/MS4A1/PLA2G2D/PTPRC/TAC1/TLR9/TNFRSF13B/TN  
FSF8/VCAM1/VSIG4/EPO/HHLA2/IHH/PLA2G2F/SCGB1A1 33

GO:1903531 BP negative regulation of secretion by cell 26/1105 194/16241 0.000698043

0.012333776 0.009882562

ADIPOQ/AGTR2/APOE/CARTPT/CCR2/CD22/CNR1/FCGR2B/FN1/KCNB1/LRRC32/NPY5R/P2R  
Y12/SFRP1/SSC5D/SYT11/SYT4/TACR2/TLR8/ADTRP/APOA1/APOA2/CARD18/FGF23/IL36RN/NPFF  
26

GO:0051208 BP sequestering of calcium ion 19/1105 124/16241 0.00070264

0.012370492 0.009911981

ANK2/ANXA6/ATP1A2/CASQ1/CASQ2/CCL19/CCL21/CCR7/CXCL9/FGF2/HTR2A/JPH2/JPH4/P  
LN/PTPRC/SLC8A1/THY1/F2/HTR2C 19

GO:0030193 BP regulation of blood coagulation 14/1105 78/162410.000709995

0.012455347 0.009979972

APOE/KRT1/SELP/SERPINE1/SERPING1/THBS1/ADTRP/APOH/F2/FGA/FGB/FGG/FOXA2/HRG  
14

GO:0031646 BP positive regulation of neurological system process 12/1105 61/16241

0.000719988 0.012541074 0.010048662

CARTPT/IGSF11/MAG/NETO1/NLGN1/RELN/RGS4/SHANK1/SOX10/TENM4/TNR/P2RX3 12

GO:0032835 BP glomerulus development 12/1105 61/162410.000719988 0.012541074

0.010048662

ACTA2/ADIPOQ/AGTR2/COL4A3/COL4A4/HEY1/KIRREL3/PDGFRB/PECAM1/SULF1/WWTR1/

BMP7 12

GO:0032330 BP regulation of chondrocyte differentiation 10/1105 45/162410.000727765  
0.012587263 0.010085671

EFEMP1/GDF5/GDF6/GLI2/GLI3/GREM1/NKX3-2/SIX2/WNT9A/HOXA11 10

GO:0048662 BP negative regulation of smooth muscle cell proliferation 10/1105  
45/162410.000727765 0.012587263 0.010085671

ADIPOQ/CNN1/IGFBP5/IL12B/MYOCN/NPR3/OGN/TGFB3/VIP/VIPR2 10

GO:0055123 BP digestive system development 21/1105 144/16241 0.000738026  
0.012694564 0.010171647

BARX1/CLMP/COL3A1/DACT1/FGF10/GLI2/GLI3/MYOCN/NKX3-2/NPY/RBPMS2/SFRP1/SFRP  
2/SIX2/SOX10/TGFB3/CDX2/IHH/OTC/REG1A/SALL1 21

GO:0048771 BP tissue remodeling 23/1105 164/16241 0.000739138 0.012694564  
0.010171647

AGTR2/AXL/BGN/CARTPT/CCR2/CSF1R/FGF10/GDF5/GPNMB/GREM1/HAND2/IGFBP5/IL12B  
/IL21/MMP2/RSPO3/SFRP1/TGFB3/THBS4/TMEM119/EFNA2/HRG/IHH 23

GO:0007187 BP G protein-coupled receptor signaling pathway, coupled to cyclic nucleotide  
second messenger 31/1105 248/16241 0.000758074 0.012850767 0.010296807

ADCY2/ADCY5/ADCYAP1/ADGRB3/ADGRD1/ADRB3/AGTR2/AKAP12/CHRM2/CNR1/CXCL9/E  
DNRA/FLNA/GLP2R/GNAO1/GPR26/GRIK3/HTR2A/HTR7/NPR3/NPY/NPY1R/P2RY12/PLN/PTGER3  
/PTGFR/S1PR3/VIP/XCR1/ADGRG7/HTR2C 31

GO:0002864 BP regulation of acute inflammatory response to antigenic stimulus 5/1105  
12/162410.00076393 0.012850767 0.010296807 ADCYAP1/CCR7/CNR1/FCGR2B/NPY5R  
5

GO:0042340 BP keratan sulfate catabolic process 5/1105 12/162410.00076393  
0.012850767 0.010296807 KERA/LUM/OGN/OMD/PRELP 5

GO:0042659 BP regulation of cell fate specification 5/1105 12/162410.00076393  
0.012850767 0.010296807 AR/DKK1/FGF2/FGFR1/SFRP25

GO:0045416 BP positive regulation of interleukin-8 biosynthetic process 5/1105  
12/162410.00076393 0.012850767 0.010296807 ELANE/TLR7/TLR8/TLR9/APOA2 5

GO:0070208 BP protein heterotrimerization 5/1105 12/162410.00076393 0.012850767  
0.010296807 ADIPOQ/COL1A1/COL1A2/COL6A1/COL6A2 5

GO:0014706 BP striated muscle tissue development 41/1105 359/16241 0.000774955  
0.012991736 0.010409759

ACTN2/AGTR2/ASB2/BVES/CASQ1/COL11A1/COL19A1/DCN/DKK1/EGR2/ELN/FGF2/FGFR1/F  
OXF2/GREM1/HEG1/HEY1/IGF1/JPH2/KCNK2/MEOX2/MYH11/MYL3/MYOCN/MYOZ2/P2RX2/PD  
GFRB/PGM5/PI16/PLN/POPDC2/RBM24/RGS4/SGCD/SGCG/SLC8A1/SMYD1/TENM4/ZFPM2/BM  
P7/FOXH1 41

GO:0060193 BP positive regulation of lipase activity 13/1105 70/162410.000779825  
0.013028908 0.010439544

ADCYAP1R1/AGTR1/EDNRA/FGF2/FGFR1/GPIHBP1/HTR2A/NTRK2/P2RY12/PDGFRB/APOA4/  
APOA5/APOH 13

GO:0009612 BP response to mechanical stimulus 27/1105 206/16241 0.000787541  
0.013113225 0.010507103

ATP1A2/COL11A1/COL1A1/COL3A1/CXCL12/DCN/FOXP2/GDF5/HTR2A/KCNA1/KCNA5/KCNK

2/KCNK4/MAG/MPO/NRXN2/PHF24/RETN/SLC8A1/THBS1/TIFAB/TLR7/TLR8/TNC/ADGRV1/IHH/  
P2RX3 27

GO:0030335 BP positive regulation of cell migration 51/1105 475/16241 0.000804169  
0.013302587 0.010658832

ADAMTS1/ADGRA2/AKAP12/AKT3/ANGPT4/CCL19/CCL21/CCR2/CCR7/CMKLR1/COL1A1/CSF  
1R/CXCL12/CXCL13/DDR2/ELANE/FGF10/FGF2/FGF7/FGFR1/FLNA/FN1/GPNMB/IGF1/IGFBP5/M  
YLK/MYOC/NRP2/P2RY12/PDGFRB/PECAM1/PTPRC/RELN/ROR2/SELP/SERPINE1/SLC8A1/SMOC2  
/SPARC/TAC1/THBS1/THBS4/THY1/TWIST2/BMP7/CCL20/CXCL17/FGFBP1/S100A14/S100A7/TER  
T 51

GO:0051384 BP response to glucocorticoid 21/1105 145/16241 0.000808984  
0.013302587 0.010658832

ADCYAP1/ADIPOQ/AGTR2/BCHE/CDO1/FLT3/NEFL/SERPINF1/SLIT2/SLIT3/SPARC/ABCC2/AG  
XT/APOA2/CPN1/EPO/HSD3B1/IL22/PCK1/SCGB1A1/UGT1A1 21

GO:0001764 BP neuron migration 22/1105 155/16241 0.000810732 0.013302587  
0.010658832

ASTN1/AXL/CAMK2A/CCKAR/CCR4/COL3A1/CXCL12/DCLK1/FGFR1/FLNA/FLRT2/GPM6A/KIR  
REL3/NDN/NRG3/NRP2/NTRK2/RELN/SPOCK1/TNN/ATOH1/FEZF1 22

GO:0006937 BP regulation of muscle contraction 22/1105 155/16241 0.000810732  
0.013302587 0.010658832

ANK2/ANXA6/ATP1A2/CASQ1/CASQ2/CHRM2/CHRNA3/CNN1/CTNNA3/FLNA/HSPB6/KCNA  
1/KCNMA1/MYL3/MYL9/MYOC/PLN/SLC8A1/SPX/TACR1/TACR2/TNNT3 22

GO:0015672 BP monovalent inorganic cation transport 52/1105 487/16241 0.000814391  
0.013302587 0.010658832

ABCC9/ACTN2/ADCYAP1/ANK2/ATP1A2/ATP1A4/CASQ2/CNTN1/DPP6/FHL1/FLNA/FXYD6/H  
TR2A/KCNA1/KCNA2/KCNA4/KCNA5/KCNB1/KCNE4/KCNIP1/KCNJ5/KCNK2/KCNK3/KCNK4/KCNM  
A1/KCNMB1/KCNQ5/LRR38/NALCN/NETO1/P2RY12/RGS4/SCN11A/SCN2B/SCN7A/SLC12A3/SLC  
8A1/VIP/ATP2C2/ATP6V1C2/COX7B2/FXYD4/KCNK10/KCNV1/P2RX3/PCSK9/SLC10A5/SLC13A2/SL  
C17A4/SLC34A3/SLC9A2/TRPM5 52

GO:0001763 BP morphogenesis of a branching structure 26/1105 196/16241  
0.000815163 0.013302587 0.010658832

AGTR2/AR/EDNRA/EPHA7/FGF10/FGF2/FGF7/FGFR1/GLI2/GLI3/RSP02/RSP03/SFRP1/SFRP  
2/SIX2/SLIT2/SOX10/SULF1/TNC/WNT9B/BMP7/HOXA11/HOXB13/HOXD11/IHH/SALL1 26

GO:0003418 BP growth plate cartilage chondrocyte differentiation 7/1105 24/16241  
0.000820472 0.013344899 0.010692735

ANXA6/COL14A1/COL6A1/COL6A2/COL6A3/NPPC/VIT7

GO:0097305 BP response to alcohol 29/1105 228/16241 0.000837136 0.013570997  
0.010873898

ADCY2/ADCY5/ADCYAP1/ADCYAP1R1/ADIPOQ/CCL19/CCL21/CCR7/CDO1/CNR1/CYBB/HTR3  
A/KCNMB1/NEFL/NPPC/PENK/PTGDR/PTGFR/RGS4/SFRP1/SLIT2/SLIT3/SPARC/TNC/VCAM1/ADH  
7/APOBEC1/HSD3B1/UGT1A1 29

GO:0009954 BP proximal/distal pattern formation 8/1105 31/16241 0.000862133  
0.013839212 0.011088808 EN1/FGF10/GLI2/GLI3/IRX1/HOXA11/SIX3/SP8 8

GO:0051968 BP positive regulation of synaptic transmission, glutamatergic 8/1105  
31/16241 0.000862133 0.013839212 0.011088808

ADCYAP1/CACNG7/CCR2/NLGN1/RELN/ROR2/SHANK1/TNR 8  
 GO:0065005 BP protein-lipid complex assembly 8/1105 31/162410.000862133  
 0.013839212 0.011088808 APOE/PCDHGA3/APOA1/APOA2/APOA4/APOA5/APOC3/MTTP  
 8  
 GO:0001818 BP negative regulation of cytokine production 32/1105 261/16241  
 0.000875594 0.013947201 0.011175335  
 ADIPOQ/AXL/BPI/CMKLR1/ELANE/FCGR2B/FGFR1/FN1/GPNMB/IGF1/IL12B/LILRA4/LRRC32  
 /NAV3/PTPRC/PTPRS/SSC5D/SYT11/TGFB3/THBS1/TLR8/TLR9/VSIG4/APOA1/APOA2/CARD18/F2/  
 IL36RN/ORM1/PGLYRP3/PGLYRP4/SCGB1A1 32  
 GO:0046883 BP regulation of hormone secretion 32/1105 261/16241 0.000875594  
 0.013947201 0.011175335  
 ADCY5/ADCYAP1/ADIPOQ/AGTR1/AGTR2/BLK/CARTPT/CCKAR/CHRNA3/CNR1/EPHA5/FGFR  
 1/GRP/KCNA5/KCNB1/RETN/SFRP1/TAC1/TACR2/VIP/FGA/FGB/FGF23/FGG/FOXA2/HTR2C/KISS1/  
 NEUROD1/NPFF/REN/RFX6/TFR2 32  
 GO:0060078 BP regulation of postsynaptic membrane potential 20/1105 136/16241  
 0.000877379 0.013947201 0.011175335  
 ADCYAP1/CBLN1/CHRNA3/CHRNA6/FGF14/GABRA5/GRIA1/GRIK3/GRIK5/IGSF11/KCNA1/NE  
 TO1/NLGN1/P2RX2/RELN/RGS4/SHANK1/GABRA4/NPFF/P2RX3 20  
 GO:0044241 BP lipid digestion 6/1105 18/162410.000892092 0.014089884 0.011289662  
 APOA1/APOA2/APOA4/APOA5/CEL/CLPS 6  
 GO:0090026 BP positive regulation of monocyte chemotaxis 6/1105 18/162410.000892092  
 0.014089884 0.011289662 CCR2/CXCL12/SERPINE1/CXCL17/S100A14/S100A7 6  
 GO:0030593 BP neutrophil chemotaxis 16/1105 98/162410.000901394 0.014191178  
 0.011370824  
 CCL13/CCL14/CCL19/CCL21/CCR7/CXCL13/CXCL9/ITGB2/JAM3/SLIT2/THBS4/CCL15/CCL20/I  
 L36G/IL36RN/IL37 16  
 GO:0002685 BP regulation of leukocyte migration 25/1105 187/16241 0.000908277  
 0.014253853 0.011421043  
 CCL19/CCL21/CCR2/CCR7/CMKLR1/CXCL12/CXCL13/ELANE/EMILIN1/GREM1/JAM3/KLRC4-K  
 LRK1/P2RY12/SELP/SERPINE1/SLIT2/THBS1/THBS4/THY1/ADTRP/C10orf99/CCL20/CXCL17/S100A  
 14/S100A7 25  
 GO:0060348 BP bone development 27/1105 208/16241 0.000913504 0.014290229  
 0.01145019  
 ANXA6/COL14A1/COL1A1/COL6A1/COL6A2/COL6A3/COMP/FBN1/GLI3/GREM1/IGF1/MYOC  
 /NPPC/PTPRC/RANBP3L/RIPPLY2/SFRP2/SFRP4/SPARC/SULF1/TGFB3/TIFAB/TMEM119/VIT/CDX1  
 /HOXA11/IHH 27  
 GO:0021766 BP hippocampus development 14/1105 80/162410.000921432 0.014368484  
 0.011512892  
 ALK/EMX2/EPHA5/GLI3/KCNA1/KIRREL3/NEFL/PTPRS/RELN/ZEB2/HSD3B1/LHX5/NEUROD1/  
 NR2E1 14  
 GO:0021700 BP developmental maturation 33/1105 273/16241 0.00093772  
 0.0145762 0.011679327  
 ADGRB3/AXL/C1QA/CCL19/CCL21/DAZL/FGFR1/GREM1/IGF1/IL21/MMP2/MYOC/NEFL/NFA  
 SC/NPPC/PDE3A/PTPRN/RELN/SEZ6L/SHANK1/SOX10/SYT4/TRIM58/DEFB1/EPO/FGG/HOXB13/I

HH/REN/SEMG1/SIX3/SLC26A3/TDRD5 33

GO:0035296 BP regulation of tube diameter 20/1105 137/16241 0.000963196

0.014777431 0.011840566

ACTA2/ADCYAP1/ADRB3/AGTR1/AGTR2/APOE/ATP1A2/COMP/EDNRA/HTR2A/HTR7/KCNA5/  
KCNMA1/KCNMB1/NPPC/SLC8A1/VIP/FGA/FGB/FGG 20

GO:0050880 BP regulation of blood vessel size 20/1105 137/16241 0.000963196

0.014777431 0.011840566

ACTA2/ADCYAP1/ADRB3/AGTR1/AGTR2/APOE/ATP1A2/COMP/EDNRA/HTR2A/HTR7/KCNA5/  
KCNMA1/KCNMB1/NPPC/SLC8A1/VIP/FGA/FGB/FGG 20

GO:0097746 BP regulation of blood vessel diameter 20/1105 137/16241 0.000963196

0.014777431 0.011840566

ACTA2/ADCYAP1/ADRB3/AGTR1/AGTR2/APOE/ATP1A2/COMP/EDNRA/HTR2A/HTR7/KCNA5/  
KCNMA1/KCNMB1/NPPC/SLC8A1/VIP/FGA/FGB/FGG 20

GO:0002688 BP regulation of leukocyte chemotaxis 17/1105 108/16241 0.000966327

0.014777431 0.011840566

CCL19/CCL21/CCR2/CCR7/CMKLR1/CXCL12/CXCL13/GREM1/JAM3/KLRC4-KLRK1/SERPINE1/  
SLIT2/THBS1/THBS4/CXCL17/S100A14/S100A7 17

GO:0045667 BP regulation of osteoblast differentiation 17/1105 108/16241 0.000966327

0.014777431 0.011840566

DDR2/GDF10/GLI3/GREM1/HAND2/IGF1/IGFBP5/NPPC/RANBP3L/RORB/SFRP1/SFRP2/TME  
M119/TNN/TWIST2/BMP7/FGF23 17

GO:0030509 BP BMP signaling pathway 21/1105 147/16241 0.000968716 0.014777431

0.011840566

CHRD1/COMP/DKK1/FBN1/FSTL1/GDF5/GDF6/GREM1/GREM2/HTRA3/RBPMS2/RGMA/RN  
F165/ROR2/SFRP1/SFRP2/SFRP4/SMAD9/SULF1/BMP7/DSG4 21

GO:0051209 BP release of sequestered calcium ion into cytosol 18/1105 118/16241

0.001012369 0.015395524 0.012335819

ANK2/ATP1A2/CASQ1/CASQ2/CCL19/CCL21/CCR7/CXCL9/FGF2/HTR2A/JPH2/JPH4/PLN/PTP  
RC/SLC8A1/THY1/F2/HTR2C 18

GO:0010721 BP negative regulation of cell development 37/1105 319/16241

0.001032005 0.015594593 0.012495324

ADCYAP1/APOE/COL3A1/DKK1/DPYSL3/EPHA7/FBLN1/FBN1/FRZB/GLI3/IGF1/MAG/NGFR/N  
LGN1/NPPC/NRG3/PI16/PTPRS/RGMA/RGS4/S1PR3/SLIT2/SOX10/SPOCK1/STMN2/SYT4/THY1/T  
NN/TNR/VIM/ASCL2/BMP7/F2/NKX6-2/NR2E1/SIX3/TERT 37

GO:0009953 BP dorsal/ventral pattern formation 15/1105 90/16241 0.001037121

0.015594593 0.012495324

DSCAML1/EN1/GLI2/GLI3/GREM1/GREM2/SFRP1/EVX1/HOXA11/HOXD11/NKX6-2/NOTO/R  
FX4/SIX3/SP8 15

GO:0035249 BP synaptic transmission, glutamatergic 15/1105 90/16241 0.001037121

0.015594593 0.012495324

ADCYAP1/ATP1A2/CACNG7/CCR2/CDH2/CNR1/DKK1/GRIK3/GRIK5/HTR2A/NLGN1/RELN/RO  
R2/SHANK1/TNR 15

GO:0031103 BP axon regeneration 10/1105 47/16241 0.001043639 0.015594593

0.012495324 GAP43/JAM3/MAG/NEFL/PTPRS/RGMA/TNC/TNR/APOA1/FOLR1 10

GO:0050818 BP regulation of coagulation 14/1105 81/162410.001045602 0.015594593  
0.012495324  
APOE/KRT1/SELP/SERPINE1/SERPING1/THBS1/ADTRP/APOH/F2/FGA/FGB/FGG/FOXA2/HRG  
14

GO:0032412 BP regulation of ion transmembrane transporter activity 30/1105 242/16241  
0.001046298 0.015594593 0.012495324  
ACTN2/ANK2/ATP1A2/CACNG7/CASQ1/CASQ2/CCR2/FGF14/FHL1/FXYD6/GRIA1/HTR3A/JPH  
2/JPH4/KCNA1/KCNE4/LRRC38/NEFL/NETO1/NLGN1/PLN/RELN/SCN2B/SHANK1/SHISA8/STAC/TL  
R9/EPO/FXYD4/PCSK9 30

GO:0050808 BP synapse organization 44/1105 399/16241 0.001047682 0.015594593  
0.012495324  
ADD2/ADGRB3/APOE/C1QA/C1QB/C1QC/CBLN1/CDH2/CNKS2/DKK1/EPHA7/FCGR2B/FLRT  
2/GAP43/GPM6A/IL10RA/KIRREL3/LRFN5/LRRC4C/LRRTM1/NEFL/NFASC/NLGN1/NRP2/NRXN2/  
NTNG1/NTRK2/P2RX2/PTPRS/RELN/SEZ6L/SHANK1/SLITRK2/SLITRK3/SLITRK4/SLITRK5/SPARC/SP  
ARCL1/SYNDIG1/THBS2/TNC/TNR/TUBA1A/CEL 44

GO:0045834 BP positive regulation of lipid metabolic process 20/1105 138/16241  
0.001056118 0.01560678 0.012505089  
ADIPOQ/AGTR1/APOE/CCL19/CCL21/CCR7/FGF2/FLT3/HTR2A/P2RY12/PDGFRB/SORBS1/AP  
OA1/APOA2/APOA4/APOA5/F2/FABP1/HTR2C/MLXIPL 20

GO:0043270 BP positive regulation of ion transport 32/1105 264/16241 0.001061635  
0.01560678 0.012505089  
ACTN2/ADCYAP1R1/ANK2/APOE/CAMK2A/CASQ1/CCR2/CNTN1/CXCL12/CXCL9/FGF14/FHL1  
/FLNA/HTR3A/JPH2/KCNA1/KCNMB1/LRRC38/MYLK/P2RX2/P2RY12/PDGFRB/RELN/STAC/SYT4/T  
ACR2/THY1/APOA1/ATP2C2/CYP4F2/F2/P2RX3 32

GO:0003081 BP regulation of systemic arterial blood pressure by renin-angiotensin 7/1105  
25/162410.001073294 0.01560678 0.012505089  
AGTR1/AGTR2/CMA1/CTSG/SUCNR1/NOX1/REN 7

GO:0021952 BP central nervous system projection neuron axonogenesis 7/1105  
25/162410.001073294 0.01560678 0.012505089  
CDH11/DCLK1/GLI2/PLXNA4/SLIT2/ZEB2/NR2E1 7

GO:0034114 BP regulation of heterotypic cell-cell adhesion 7/1105 25/162410.001073294  
0.01560678 0.012505089 ADIPOQ/THY1/APOA1/BMP7/FGA/FGB/FGG 7

GO:0050901 BP leukocyte tethering or rolling 7/1105 25/162410.001073294 0.01560678  
0.012505089 ADD2/CCL21/CCR2/CXCL12/ELANE/SELP/VCAM1 7

GO:0061037 BP negative regulation of cartilage development 7/1105 25/16241  
0.001073294 0.01560678 0.012505089  
EFEMP1/FRZB/GDF5/GLI2/GREM1/NKX3-2/WNT9A 7

GO:0030282 BP bone mineralization 17/1105 109/16241 0.001073919 0.01560678  
0.012505089  
ASPN/COL1A2/COMP/DDR2/GPNMB/GREM1/IGF1/MGP/OMD/ROR2/RSP02/SLC8A1/TGFB3  
/TMEM119/ADGRV1/BMP7/FGF23 17

GO:0042573 BP retinoic acid metabolic process 8/1105 32/162410.001081798  
0.015674908 0.012559678  
ADH1B/ADH7/CYP3A4/UGT1A1/UGT1A3/UGT1A7/UGT1A8/UGT1A9 8

GO:0006026 BP aminoglycan catabolic process 12/1105 64/162410.001124451  
0.016197369 0.012978305  
BGN/DCN/FGF2/KERA/LUM/OGN/OMD/PRELP/SDC3/VCAN/PGLYRP3/PGLYRP412

GO:0046503 BP glycerolipid catabolic process 12/1105 64/162410.001124451 0.016197369  
0.012978305  
APOE/FABP4/APOA1/APOA2/APOA4/APOA5/APOC3/FABP1/FABP2/FABP6/PLA2G4E/PLA2G4  
F 12

GO:0098542 BP defense response to other organism 50/1105 471/16241 0.001154274  
0.016561514 0.01327008  
ABCC9/BPI/CEBPE/CLEC6A/CTSG/CXCL13/CXCL9/DEFB124/ELANE/FGL2/FLNA/IL12B/KLRK4-  
KLRK1/MPEG1/MPO/PTPRC/SELP/SERPINE1/SSC5D/SYT11/TLR7/TLR8/TLR9/TNFSF8/APOBEC1/B  
PIFA2/C10orf99/CCL20/DEFA1/DEFB1/DEFB126/DEFB4A/DMBT1/F2/FGA/FGB/HRG/IL17A/IL36R  
N/LCN2/LYPD8/LYZL4/PGLYRP3/PGLYRP4/PRB3/REG3G/S100A14/S100A7/SEMG1/WFDC12 50

GO:0050817 BP coagulation 37/1105 321/16241 0.001156474 0.016561514  
0.01327008  
A2M/APOE/AXL/CLEC1B/COL1A1/COL1A2/COL3A1/COMP/EHD2/F13A1/FBLN1/FLNA/GP5/K  
RT1/MMRN1/MYL9/P2RX2/P2RY12/PRKCB/SELP/SERPINE1/SERPING1/THBS1/ZFPM2/ADTRP/AP  
OH/C4BPB/CYP4F2/F2/FGA/FGB/FGG/FOXA2/HRG/P2RX3/SEMG1/SERPINA10 37

GO:0045078 BP positive regulation of interferon-gamma biosynthetic process 5/1105  
13/162410.001172143 0.016653406 0.013343709 IL12B/IL21/TLR7/TLR8/TLR9 5

GO:0060601 BP lateral sprouting from an epithelium 5/1105 13/162410.001172143  
0.016653406 0.013343709 AR/FGF10/GLI2/SULF1/BMP75

GO:0061045 BP negative regulation of wound healing 13/1105 73/162410.001173062  
0.016653406 0.013343709  
APOE/FGF2/KRT1/SERPINE1/SERPING1/THBS1/ADTRP/APOH/F2/FGA/FGB/FGG/HRG 13

GO:0044058 BP regulation of digestive system process 9/1105 40/162410.001210642  
0.017088139 0.013692043  
FGF10/PTGER3/TAC1/TIFAB/APOA1/APOA2/APOA4/APOA5/NEUROD1 9

GO:0050832 BP defense response to fungus 9/1105 40/162410.001210642 0.017088139  
0.013692043 CLEC6A/CTSG/ELANE/MPO/C10orf99/DEFA1/HRG/IL17A/IL36RN 9

GO:0032331 BP negative regulation of chondrocyte differentiation 6/1105 19/16241  
0.001229368 0.017302735 0.013863991 EFEMP1/GDF5/GLI2/GREM1/NKX3-2/WNT9A  
6

GO:0008038 BP neuron recognition 10/1105 48/162410.001239201 0.017325111  
0.01388192 CNR1/CRTAC1/DSCAML1/EPHA3/GAP43/NCAM2/NDN/NTM/PALLD/TNN 10

GO:0071772 BP response to BMP 22/1105 160/16241 0.001241539 0.017325111  
0.01388192  
CHRD1/COMP/DKK1/FBN1/FSTL1/GDF5/GDF6/GREM1/GREM2/HEYL/HTRA3/RBPMS2/RG  
MA/RNF165/ROR2/SFRP1/SFRP2/SFRP4/SMAD9/SULF1/BMP7/DSG4 22

GO:0071773 BP cellular response to BMP stimulus 22/1105 160/16241 0.001241539  
0.017325111 0.01388192  
CHRD1/COMP/DKK1/FBN1/FSTL1/GDF5/GDF6/GREM1/GREM2/HEYL/HTRA3/RBPMS2/RG  
MA/RNF165/ROR2/SFRP1/SFRP2/SFRP4/SMAD9/SULF1/BMP7/DSG4 22

GO:0090130 BP tissue migration 33/1105 278/16241 0.00127718 0.017728815

0.014205391  
 ACTA2/ACTG2/ADGRA2/AGTR2/AKT3/ANGPT4/APOE/CXCL13/CYP1B1/DCN/FGF10/FGF2/FGF7/FGFR1/GREM1/ITGB2/MEOX2/NRP2/PECAM1/SERPINF1/SLIT2/SMOC2/SPARC/TAC1/THBS1/ZEB2/ADTRP/APOA1/APOH/FGFBP1/HRG/NR2E1/PRSS3 33  
 GO:0051249 BP regulation of lymphocyte activation 44/1105 403/16241 0.001280209  
 0.017728815 0.014205391  
 AXL/CCL19/CCL21/CCR2/CCR7/CD22/CLC/CLEC4G/CLECL1/CR1/FCGR2B/FGF10/FGL2/GLI2/GLI3/GPNMB/HLA-DOA/HLA-DPA1/HLA-DPB1/IGF1/IL12B/IL21/KLRC4-KLRK1/LILRB4/LMO1/LRRC32/PLA2G2D/PTPRC/SFRP1/TAC1/THY1/TLR9/TNFRSF13B/TNFSF8/VCAM1/VSIG4/EPO/FOXM1/HHLA2/IHH/PGLYRP3/PGLYRP4/PLA2G2F/SCGB1A144  
 GO:0060485 BP mesenchyme development 32/1105 267/16241 0.001281297  
 0.017728815 0.014205391  
 ACTA2/ACTG2/ANXA6/BNC2/COL1A1/DACT3/EDNRA/EPHA3/FGF10/FGFR1/FN1/FRZB/GREM1/HAND2/HEYL/NRP2/PDGFRB/RANBP3L/RBM24/SFRP1/SFRP2/SIX2/SOX10/TGFB11/TGFB3/WWTR1/ZEB2/ZFPM2/BMP7/FOLR1/FOXA2/FOXH1 32  
 GO:0010633 BP negative regulation of epithelial cell migration 12/1105 65/16241  
 0.001295265 0.017871744 0.014319915  
 AGTR2/ANGPT4/APOE/CXCL13/DCN/FGF2/MEOX2/SERPINF1/SLIT2/THBS1/APOH/HRG 12  
 GO:0021987 BP cerebral cortex development 17/1105 111/16241 0.00131985  
 0.018159948 0.014550842  
 CDH2/COL3A1/EMX2/FLNA/FOXP2/GLI3/NEFL/NPY/NRP2/NTRK2/P2RY12/PTPRS/RELN/SLIT2/ATOH1/EMX1/NR2E1 17  
 GO:0019731 BP antibacterial humoral response 8/1105 33/16241 0.00134394  
 0.018439764 0.014775047 CTSG/ELANE/DEFA1/DEFB1/DMBT1/FGA/FGB/SEMGI 8  
 GO:0021953 BP central nervous system neuron differentiation 24/1105 182/16241  
 0.001378897 0.018705266 0.014987783  
 CBLN1/CDH11/CSF1R/DCLK1/DKK1/GLI2/GLI3/NPY/NRP2/NTRK2/PHOX2A/PLXNA4/SFRP1/SFRP2/SLIT2/SPOCK1/WNT9B/ZEB2/EMX1/EVX1/LHX5/NKX6-2/NR2E1/SALL1 24  
 GO:0031099 BP regeneration 24/1105 182/16241 0.001378897 0.018705266  
 0.014987783  
 AXL/CXCL12/FGF10/FLT3/GAP43/GLI3/IGF1/JAM3/MAG/MUSTN1/NEFL/PRRX1/PTPRS/RGMA/THY1/TNC/TNR/APOA1/APOA2/APOA5/FOLR1/IHH/REG1A/UGT1A1 24  
 GO:0031644 BP regulation of neurological system process 19/1105 131/16241  
 0.001379717 0.018705266 0.014987783  
 CARTPT/CBLN1/IGSF11/MAG/NETO1/NLGN1/NPTX1/RELN/RGS4/SCN11A/SHANK1/SOX10/SIPX/TENM4/TNR/VIP/HTR2C/NPFF/P2RX3 19  
 GO:0043271 BP negative regulation of ion transport 20/1105 141/16241 0.001382331  
 0.018705266 0.014987783  
 ACTN2/ADCYAP1/AGTR2/ATP1A2/CASQ2/CNR1/GNAO1/HTR2A/KCNE4/NPY5R/PLN/RGS4/SFRP4/THBS1/TLR9/VIP/CYP4F2/EPO/PCSK9/SEMGI 20  
 GO:0072006 BP nephron development 20/1105 141/16241 0.001382331 0.018705266  
 0.014987783  
 ACTA2/ADIPOQ/AGTR2/COL4A3/COL4A4/FGF2/GLI3/HEYL/IRX1/KIRREL3/PDGFRB/PECAM1/SIX2/SULF1/WNT9B/WWTR1/BMP7/HOXA11/HOXD11/SALL1 20

GO:1990266 BP neutrophil migration 17/1105 112/16241 0.001459682 0.019589335  
0.015696152  
CCL13/CCL14/CCL19/CCL21/CCR7/CXCL13/CXCL9/ITGB2/JAM3/PECAM1/SLIT2/THBS4/CCL1  
5/CCL20/IL36G/IL36RN/IL37 17

GO:0048546 BP digestive tract morphogenesis 10/1105 49/162410.001463617  
0.019589335 0.015696152  
DACT1/FGF10/GLI2/GLI3/RBPMS2/SFRP1/SFRP2/SIX2/SOX10/IHH 10

GO:1904705 BP regulation of vascular smooth muscle cell proliferation 10/1105  
49/162410.001463617 0.019589335 0.015696152  
ADAMTS1/ADIPOQ/CNN1/FGF2/IGF1/IGFBP5/MMP2/MYOC/TGFB3/TERT 10

GO:1990874 BP vascular smooth muscle cell proliferation 10/1105 49/162410.001463617  
0.019589335 0.015696152  
ADAMTS1/ADIPOQ/CNN1/FGF2/IGF1/IGFBP5/MMP2/MYOC/TGFB3/TERT 10

GO:0051965 BP positive regulation of synapse assembly 12/1105 66/162410.001486981  
0.019847968 0.015903385  
ADGRB3/CBLN1/FLRT2/LRRTM1/NLGN1/NTRK2/SLITRK2/SLITRK3/SLITRK4/SLITRK5/SYNDIG  
1/THBS2 12

GO:0030326 BP embryonic limb morphogenesis 18/1105 122/16241 0.001496316  
0.019864602 0.015916713  
AFF3/DKK1/EN1/FGFR1/GDF5/GLI2/GLI3/HAND2/PRRX1/ROR2/RSPO2/SFRP2/WNT9A/BMP  
7/HOXA11/IHH/SALL1/SP8 18

GO:0035113 BP embryonic appendage morphogenesis 18/1105 122/16241 0.001496316  
0.019864602 0.015916713  
AFF3/DKK1/EN1/FGFR1/GDF5/GLI2/GLI3/HAND2/PRRX1/ROR2/RSPO2/SFRP2/WNT9A/BMP  
7/HOXA11/IHH/SALL1/SP8 18

GO:0030510 BP regulation of BMP signaling pathway 14/1105 84/162410.00150536  
0.019930801 0.015969755  
CHRD1/DKK1/FBN1/FSTL1/GDF5/GREM1/GREM2/HTRA3/RBPMS2/RNF165/SFRP1/SFRP2/S  
FRP4/SULF1 14

GO:0042445 BP hormone metabolic process 28/1105 226/16241 0.001524622  
0.020077599 0.016087378  
ADH1B/CHAT/CHST8/CMA1/CTSG/CYP1B1/FGFR1/GHR/HSD11B1/NGF/PCSK1/TPO/ADH7/A  
KR1B10/AKR1C4/APOA1/CYP3A4/DUOX2/DUOXA2/HSD3B1/IYD/REN/TTR/UGT1A1/UGT1A3/UGT  
1A7/UGT1A8/UGT1A9 28

GO:0090257 BP regulation of muscle system process 28/1105 226/16241 0.001524622  
0.020077599 0.016087378  
ANK2/ANXA6/ATP1A2/CASQ1/CASQ2/CHRM2/CHRNA3/CNN1/CTNNA3/FLNA/HAND2/HSPB  
6/IGF1/IGFBP5/KCNA1/KCNMA1/MYL3/MYL9/MYOC/PI16/PLN/RGS4/SLC8A1/SPX/TACR1/TACR  
2/TIFAB/TNNT3 28

GO:2001257 BP regulation of cation channel activity 22/1105 163/16241 0.001584491  
0.020810212 0.016674392  
ACTN2/ANK2/CACNG7/CASQ1/CASQ2/CCR2/FGF14/GRIA1/JPH2/JPH4/KCNA1/KCNE4/LRRC3  
8/NEFL/NETO1/NLGN1/PLN/RELN/SHANK1/SHISA8/STAC/EPO 22

GO:0021885 BP forebrain cell migration 11/1105 58/162410.001622224 0.021248973

0.017025954 AXL/CXCL12/EMX2/GLI3/NRG3/NRP2/P2RY12/RELN/SLIT2/TNR/NR2E1 11  
 GO:0038084 BP vascular endothelial growth factor signaling pathway 8/1105 34/16241  
 0.00165414 0.021407136 0.017152683  
 ADGRA2/DCN/FLT3/NRP2/PDGFRB/SMOC2/HRG/XDH 8  
 GO:0055090 BP acylglycerol homeostasis 8/1105 34/16241 0.00165414 0.021407136  
 0.017152683 APOE/GPIHBP1/APOA1/APOA4/APOA5/APOC3/MLXIPL/PLA2G12B 8  
 GO:0070328 BP triglyceride homeostasis 8/1105 34/16241 0.00165414 0.021407136  
 0.017152683 APOE/GPIHBP1/APOA1/APOA4/APOA5/APOC3/MLXIPL/PLA2G12B 8  
 GO:0009713 BP catechol-containing compound biosynthetic process 6/1105 20/16241  
 0.00165609 0.021407136 0.017152683 AGTR2/HAND2/MOXD1/DDC/PAH/PNMT 6  
 GO:0042423 BP catecholamine biosynthetic process 6/1105 20/16241 0.00165609  
 0.021407136 0.017152683 AGTR2/HAND2/MOXD1/DDC/PAH/PNMT 6  
 GO:0050863 BP regulation of T cell activation 35/1105 305/16241 0.001672452  
 0.021561907 0.017276695  
 CCL19/CCL21/CCR2/CCR7/CLC/CLEC4G/CLECL1/CR1/FCGR2B/FGL2/GLI2/GLI3/GPNMB/HLA-  
 DOA/HLA-DPA1/HLA-DPB1/IGF1/IL12B/IL21/KLRC4-KLRK1/LILRB4/LMO1/LRRC32/PLA2G2D/PTPR  
 C/THY1/TNFSF8/VCAM1/VSIG4/EPO/FOXN1/HHLA2/IHH/PLA2G2F/SCGB1A1 35  
 GO:0042108 BP positive regulation of cytokine biosynthetic process 12/1105 67/16241  
 0.001701495 0.021878912 0.017530699  
 AKAP12/CCR2/CYBB/ELANE/IL12B/IL21/PTPRC/THBS1/TLR7/TLR8/TLR9/APOA2 12  
 GO:0007501 BP mesodermal cell fate specification 5/1105 14/16241 0.001721816  
 0.021910771 0.017556226 DKK1/FGFR1/SFRP2/SIX2/HOXA11 5  
 GO:0034380 BP high-density lipoprotein particle assembly 5/1105 14/16241 0.001721816  
 0.021910771 0.017556226 APOE/APOA1/APOA2/APOA4/APOA5 5  
 GO:0035988 BP chondrocyte proliferation 5/1105 14/16241 0.001721816 0.021910771  
 0.017556226 COMP/DDR2/MUSTN1/SIX2/IHH 5  
 GO:0051917 BP regulation of fibrinolysis 5/1105 14/16241 0.001721816 0.021910771  
 0.017556226 SERPINE1/THBS1/APOH/F2/HRG 5  
 GO:0007596 BP blood coagulation 36/1105 317/16241 0.001736515 0.022040726  
 0.017660354  
 A2M/APOE/AXL/CLEC1B/COL1A1/COL1A2/COL3A1/COMP/EHD2/F13A1/FBLN1/FLNA/GP5/K  
 RT1/MMRN1/MYL9/P2RX2/P2RY12/PRKCB/SELP/SERPINE1/SERPING1/THBS1/ZFPM2/ADTRP/AP  
 OH/C4BPB/CYP4F2/F2/FGA/FGB/FGG/FOXA2/HRG/P2RX3/SERPINA10 36  
 GO:0022898 BP regulation of transmembrane transporter activity 30/1105 250/16241  
 0.001751999 0.022158197 0.017754479  
 ACTN2/ANK2/ATP1A2/CACNG7/CASQ1/CASQ2/CCR2/FGF14/FHL1/FXYD6/GRIA1/HTR3A/JPH  
 2/JPH4/KCNA1/KCNE4/LRRC38/NEFL/NETO1/NLGN1/PLN/RELN/SCN2B/SHANK1/SHISA8/STAC/TL  
 R9/EPO/FXYD4/PCSK9 30  
 GO:0010453 BP regulation of cell fate commitment 7/1105 27/16241 0.001759303  
 0.022158197 0.017754479 AR/DKK1/FGF2/FGFR1/IL12B/SFRP2/NKX6-27  
 GO:0034377 BP plasma lipoprotein particle assembly 7/1105 27/16241 0.001759303  
 0.022158197 0.017754479 APOE/APOA1/APOA2/APOA4/APOA5/APOC3/MTTP 7  
 GO:0050707 BP regulation of cytokine secretion 25/1105 196/16241 0.001776705  
 0.022267983 0.017842445

AGTR2/AKAP12/C1QTNF4/CCL19/CCR7/CLEC6A/CLEC9A/CRTAM/CSF1R/FCGR2B/FCN1/FN1/  
 LRRC32/SSC5D/SYT11/TLR8/TLR9/APOA1/APOA2/CARD18/IL17A/IL17F/IL36RN/ORM1/ORM2 25  
 GO:0007613 BP memory 17/1105 114/16241 0.001777087 0.022267983 0.017842445  
 APOE/CNR1/GRIA1/HTR2A/KCNK2/KCNK4/MAP1A/NETO1/NGF/RELN/SERPINF1/SHANK1/S  
 ORCS3/SYT4/TAC1/KCNK10/PPP1R1B 17  
 GO:0035107 BP appendage morphogenesis 20/1105 144/16241 0.001790764  
 0.022325458 0.017888498  
 AFF3/DKK1/EN1/FGF10/FGFR1/GDF5/GLI2/GLI3/HAND2/PRRX1/RNF165/ROR2/RSPO2/SFRP  
 2/WNT9A/BMP7/HOXA11/IHH/SALL1/SP8 20  
 GO:0035108 BP limb morphogenesis 20/1105 144/16241 0.001790764 0.022325458  
 0.017888498  
 AFF3/DKK1/EN1/FGF10/FGFR1/GDF5/GLI2/GLI3/HAND2/PRRX1/RNF165/ROR2/RSPO2/SFRP  
 2/WNT9A/BMP7/HOXA11/IHH/SALL1/SP8 20  
 GO:0002687 BP positive regulation of leukocyte migration 18/1105 124/16241  
 0.001803907 0.022432377 0.017974168  
 CCL19/CCL21/CCR2/CCR7/CMKLR1/CXCL12/CXCL13/ELANE/P2RY12/SELP/SERPINE1/THBS1/  
 THBS4/THY1/CCL20/CXCL17/S100A14/S100A7 18  
 GO:0048738 BP cardiac muscle tissue development 26/1105 207/16241 0.001814627  
 0.022508711 0.018035331  
 ACTN2/AGTR2/BVES/COL11A1/DKK1/FGF2/FGFR1/GREM1/HEG1/IGF1/JPH2/KCNK2/MYH11  
 /MYL3/MYOCN/PDGFRB/PI16/PLN/RGS4/SGCD/SGCG/SLC8A1/TENM4/ZFPM2/BMP7/FOXH1 26  
 GO:0032409 BP regulation of transporter activity 31/1105 262/16241 0.001855984  
 0.022963706 0.0183999  
 ACTN2/ANK2/ATP1A2/CACNG7/CASQ1/CASQ2/CCR2/FGF14/FHL1/FXYD6/GRIA1/HTR3A/JPH  
 2/JPH4/KCNA1/KCNE4/LRRC38/NEFL/NETO1/NLGN1/PLN/RELN/SCN2B/SHANK1/SHISA8/STAC/TL  
 R9/APOA2/EPO/FXYD4/PCSK9 31  
 GO:0090596 BP sensory organ morphogenesis 30/1105 251/16241 0.001864045  
 0.023005505 0.018433393  
 COL11A1/COL5A1/COL8A1/COL8A2/EFEMP1/FBN1/FGF10/FGFR1/FRZB/GLI2/GLI3/NKX3-2/  
 NTRK2/PRRX1/ROR2/RORB/SIX2/TENM3/THY1/TIFAB/WNT9A/ATOH1/BMP7/GNGT1/GRHL3/HO  
 XC13/IHH/SALL1/SIX3/USH1G 30  
 GO:1903779 BP regulation of cardiac conduction 12/1105 68/16241 0.001940802  
 0.023852458 0.019112022  
 ABCC9/ANK2/ATP1A2/ATP1A4/ATP2B2/CASQ1/CASQ2/FLNA/FXYD6/NPPC/SLC8A1/FXYD4  
 12  
 GO:0042632 BP cholesterol homeostasis 13/1105 77/16241 0.001942383 0.023852458  
 0.019112022  
 APOE/CYP7B1/FABP4/GPIHBP1/APOA1/APOA2/APOA4/APOA5/APOC3/G6PC/MTP/PCSK9/  
 PLA2G12B 13  
 GO:0050777 BP negative regulation of immune response 20/1105 145/16241  
 0.001947848 0.023859926 0.019118006  
 A2M/ADCYAP1/CCR2/CLEC4G/COL3A1/CR1/FCGR2B/FGL2/IL12B/NPY5R/PTPRC/SERPING1/T  
 GFB3/VSIG4/AMBP/APOA1/APOA2/C4BPB/PGLYRP3/PGLYRP4 20  
 GO:0002694 BP regulation of leukocyte activation 50/1105 483/16241 0.00196974

0.024068073 0.019284786  
 AXL/BPI/CCL19/CCL21/CCR2/CCR7/CD22/CLC/CLEC4G/CLECL1/CNR1/CR1/FCGR2B/FGF10/F  
 GL2/GLI2/GLI3/GPNMB/HLA-DOA/HLA-DPA1/HLA-DPB1/IGF1/IL12B/IL21/IL31RA/ITGB2/KLRC4-K  
 LRK1/LILRB4/LMO1/LRFN5/LRRC32/PLA2G2D/PTPRC/SFRP1/TAC1/THBS1/THY1/TLR9/TNFRSF13B  
 /TNFSF8/VCAM1/VSIG4/EPO/FOXP1/HHLA2/IHH/PGLYRP3/PGLYRP4/PLA2G2F/SCGB1A1 50  
 GO:0003417 BP growth plate cartilage development 8/1105 35/162410.002018322  
 0.024539593 0.019662596 ANXA6/COL14A1/COL6A1/COL6A2/COL6A3/COMP/NPPC/VIT  
 8  
 GO:0061756 BP leukocyte adhesion to vascular endothelial cell 8/1105 35/16241  
 0.002018322 0.024539593 0.019662596  
 ADD2/CCL21/CCR2/CXCL12/ELANE/ITGB2/SELP/VCAM1 8  
 GO:0055002 BP striated muscle cell development 21/1105 156/16241 0.002066906  
 0.025068253 0.02008619  
 ACTN2/AGTR2/BVES/CASQ1/CASQ2/COMP/FLNC/IGF1/LDB3/LMOD1/MYH11/MYOZ2/P2RX  
 2/PDGFRB/PGM5/PI16/RGS4/SGCD/SLC8A1/TNNT3/UCHL1 21  
 GO:0032964 BP collagen biosynthetic process 9/1105 43/162410.0020778 0.02513831  
 0.020142324 COL1A1/COL5A1/EMILIN1/NPPC/PDGFRB/TGFB3/VIM/F2/IHH 9  
 GO:0050708 BP regulation of protein secretion 47/1105 449/16241 0.002123458  
 0.025627585 0.020534361  
 ADCY5/AGTR2/AKAP12/APOE/BLK/C1QTNF4/CARTPT/CCL19/CCR7/CD22/CLEC6A/CLEC9A/C  
 NR1/CRTAM/CSF1R/EPHA5/FCGR2B/FCN1/FN1/IGF1/KCNA5/KCNB1/LRRC32/SFRP1/SSC5D/SYT1  
 1/SYT4/TGFB3/TLR8/TLR9/ADTRP/APOA1/APOA2/CARD18/FGA/FGB/FGG/FOXA2/IL17A/IL17F/IL3  
 6RN/KRT20/NEUROD1/NPFF/ORM1/ORM2/RFX6 47  
 GO:0002695 BP negative regulation of leukocyte activation 22/1105 167/16241  
 0.002165083 0.026065902 0.020885567  
 AXL/BPI/CCR2/CLEC4G/CNR1/FCGR2B/FGL2/GLI3/GPNMB/IL31RA/LRFN5/LRRC32/PLA2G2D  
 /PTPRC/SFRP1/TNFRSF13B/VSIG4/IHH/PGLYRP3/PGLYRP4/PLA2G2F/SCGB1A1 22  
 GO:0035584 BP calcium-mediated signaling using intracellular calcium source 6/1105  
 21/162410.002186504 0.026159807 0.020960808  
 PTGFR/PTPRC/SELP/VCAM1/CCL20/DEFB1 6  
 GO:2001026 BP regulation of endothelial cell chemotaxis 6/1105 21/162410.002186504  
 0.026159807 0.020960808 CXCL13/FGF2/FGFR1/SMOC2/THBS1/HRG 6  
 GO:0055092 BP sterol homeostasis 13/1105 78/162410.00218886 0.026159807  
 0.020960808  
 APOE/CYP7B1/FABP4/GPIHBP1/APOA1/APOA2/APOA4/APOA5/APOC3/G6PC/MTTP/PCSK9/  
 PLA2G12B 13  
 GO:0032677 BP regulation of interleukin-8 production 12/1105 69/162410.002206997  
 0.02621921 0.021008406  
 ADIPOQ/BPI/ELANE/FCN1/PTPRC/SERPINE1/SSC5D/TLR7/TLR8/TLR9/APOA2/IL17F 12  
 GO:0021846 BP cell proliferation in forebrain 7/1105 28/162410.002209844 0.02621921  
 0.021008406 EMX2/FGFR1/GLI3/ZEB2/IGF2BP1/LHX5/SIX3 7  
 GO:0050974 BP detection of mechanical stimulus involved in sensory perception 7/1105  
 28/162410.002209844 0.02621921 0.021008406  
 COL11A1/CXCL12/HTR2A/KCNA1/KCNK4/PHF24/ADGRV1 7

GO:0009636 BP response to toxic substance 51/1105 498/16241 0.00223972  
0.026471488 0.021210546  
ADCYAP1/ADCYAP1R1/ADIPOQ/APOE/ATP1A2/AXL/CDO1/CHRNA3/CHRNA6/CNR1/COL1A1/  
CRYAB/CYBB/CYP1B1/FBLN5/GNAO1/HTR3A/INMT/KCNA5/KCNMA1/KCNMB1/MPO/NEFL/NPPC/  
PDGFRB/PENK/RGS4/SCN2B/SLC8A1/SOD3/SPARC/TNC/TPO/TXNDC2/VCAM1/ABCC2/ADH7/AKR  
1B10/APOA4/APOBEC1/BMP7/DDC/DUOX2/FABP1/GSTA1/GUCY2C/IYD/LCN2/PDZD3/PPP1R1B/  
UGT1A1 51

GO:0042098 BP T cell proliferation 23/1105 178/16241 0.00224368 0.026471488  
0.021210546  
CCL19/CCR2/CLC/CLEC4G/CLECL1/GPNMB/HLA-DPA1/HLA-DPB1/IGF1/IL12B/IL21/LMO1/LR  
RC32/PLA2G2D/PTPRC/TNFSF8/VCAM1/VSIG4/EPO/HHLA2/IHH/PLA2G2F/SCGB1A1 23

GO:0010522 BP regulation of calcium ion transport into cytosol 15/1105 97/16241  
0.002247274 0.026471488 0.021210546  
ADCYAP1R1/ANK2/ATP1A2/CASQ1/CASQ2/CXCL9/JPH2/JPH4/P2RX2/PLN/SLC8A1/THY1/EPO  
/F2/P2RX3 15

GO:0043588 BP skin development 44/1105 415/16241 0.002270871 0.026633137  
0.021340069  
ADAMTS2/COL1A1/COL1A2/COL3A1/COL5A1/COMP/DKK1/FGF10/FGF7/FLG/IGFBP5/KRT1/  
PALLD/PTCH2/SLITRK5/DSG1/DSG4/FOXN1/GRHL3/HOXC13/KLK12/KRT12/KRT13/KRT15/KRT20/  
KRT4/KRT6B/KRT78/KRTAP3-1/KRTAP4-1/KRTAP5-4/KRTAP5-5/OVOL1/PI3/REG3A/REG3G/S100A  
7/SERPINB13/SPRR2A/SPRR2D/SPRR2E/SPRR2F/SPRR2G/TGM3 44

GO:0007599 BP hemostasis 36/1105 322/16241 0.002271841 0.026633137  
0.021340069  
A2M/APOE/AXL/CLEC1B/COL1A1/COL1A2/COL3A1/COMP/EHD2/F13A1/FBLN1/FLNA/GP5/K  
RT1/MMRN1/MYL9/P2RX2/P2RY12/PRKCB/SELP/SERPINE1/SERPING1/THBS1/ZFPM2/ADTRP/AP  
OH/C4BPB/CYP4F2/F2/FGA/FGB/FGG/FOXA2/HRG/P2RX3/SERPINA10 36

GO:1903037 BP regulation of leukocyte cell-cell adhesion 33/1105 288/16241  
0.002287597 0.026753995 0.021436908  
CCL19/CCL21/CCR2/CCR7/CLEC4G/CLECL1/CXCL12/ELANE/FCGR2B/FGL2/GLI2/GLI3/GPNMB  
/HLA-DPA1/HLA-DPB1/IGF1/IL12B/IL21/ITGB2/KLRC4-KLRK1/LILRB4/LRRC32/PLA2G2D/PTPRC/TH  
Y1/VCAM1/VSIG4/ADTRP/EPO/HHLA2/IHH/PLA2G2F/SCGB1A1 33

GO:0015696 BP ammonium transport 16/1105 107/16241 0.002324114 0.027052252  
0.021675889  
ADCYAP1/CHRNA3/CHRNA6/CNR1/CXCL12/HTR2A/KCNA2/SLC18A3/SLC6A2/SYT11/SYT4/SY  
T6/TACR2/RHBG/RHCG/SLC25A48 16

GO:0072676 BP lymphocyte migration 16/1105 107/16241 0.002324114 0.027052252  
0.021675889  
CCL13/CCL14/CCL19/CCL21/CCR2/CCR7/CXCL12/CXCL13/CYP7B1/KLRC4-KLRK1/ADTRP/C10  
orf99/CCL15/CCL20/DEFA1/S100A7 16

GO:0035924 BP cellular response to vascular endothelial growth factor stimulus 10/1105  
52/162410.002341338 0.027188306 0.021784904  
ADGRA2/DCN/FLT3/GAS1/NRP2/PDGFRB/SMOC2/VCAM1/HRG/XDH 10

GO:0015844 BP monoamine transport 14/1105 88/162410.002369631 0.02738736  
0.021944398

AGTR2/CARTPT/CHRNA6/CNR1/CXCL12/HTR2A/KCNA2/KCNB1/P2RY12/SLC6A2/SYT11/SYT4  
 /SYT6/VIP 14  
 GO:0060840 BP artery development 14/1105 88/162410.002369631 0.02738736  
 0.021944398  
 AKT3/APOE/COL3A1/COMP/GLI3/HAND2/LTBP1/MYLK/MYOC/DGFRB/PRICKLE1/PRRX1/F  
 OLR1/FOXH1 14  
 GO:0050807 BP regulation of synapse organization 26/1105 211/16241 0.002377483  
 0.02741361 0.021965431  
 ADGRB3/APOE/CBLN1/CDH2/DKK1/EPHA7/FCGR2B/FLRT2/GAP43/GPM6A/IL10RA/LRFN5/L  
 RRTM1/NLGN1/NRP2/NTRK2/PTPRS/RELN/SLITRK2/SLITRK3/SLITRK4/SLITRK5/SPARC/SYNDIG1/T  
 HBS2/TUBA1A 26  
 GO:0009812 BP flavonoid metabolic process 5/1105 15/162410.002439191 0.027583238  
 0.022101348 UGT1A1/UGT1A3/UGT1A7/UGT1A8/UGT1A9 5  
 GO:0030299 BP intestinal cholesterol absorption 5/1105 15/162410.002439191  
 0.027583238 0.022101348 APOA1/APOA2/APOA4/APOA5/CEL 5  
 GO:2000095 BP regulation of Wnt signaling pathway, planar cell polarity pathway 5/1105  
 15/162410.002439191 0.027583238 0.022101348 DACT1/DKK1/RSPO3/SFRP1/SFRP2  
 5  
 GO:0003156 BP regulation of animal organ formation 8/1105 36/162410.002442734  
 0.027583238 0.022101348 AR/DKK1/FGF10/FGFR1/HAND2/SULF1/BMP7/HOXA11 8  
 GO:0010470 BP regulation of gastrulation 8/1105 36/162410.002442734 0.027583238  
 0.022101348 ADIPOQ/COL5A1/DKK1/FGFR1/SFRP2/TENM4/APOA1/FOXA2 8  
 GO:0010656 BP negative regulation of muscle cell apoptotic process 8/1105 36/16241  
 0.002442734 0.027583238 0.022101348  
 ADCYAP1/HAND2/HSPB6/IGF1/MYOC/SFRP2/APOH/BMP7 8  
 GO:0071542 BP dopaminergic neuron differentiation 8/1105 36/162410.002442734  
 0.027583238 0.022101348 DKK1/EN1/PHOX2A/RSPO2/SFRP1/SFRP2/WNT9B/FOXA2 8  
 GO:0090218 BP positive regulation of lipid kinase activity 8/1105 36/162410.002442734  
 0.027583238 0.022101348 CCL19/CCL21/CCR7/FGF2/FLT3/P2RY12/PDGFRB/F2 8  
 GO:1900026 BP positive regulation of substrate adhesion-dependent cell spreading 8/1105  
 36/162410.002442734 0.027583238 0.022101348  
 FLNA/LIMS2/MYOC/APOA1/FGA/FGB/FGG/OLFM4 8  
 GO:1901379 BP regulation of potassium ion transmembrane transport 13/1105 79/16241  
 0.002460471 0.027719806 0.022210774  
 ACTN2/ANK2/CASQ2/DPP6/FHL1/FLNA/KCNA1/KCNE4/KCNIP1/KCNMB1/LRRC38/NETO1/RG  
 S4 13  
 GO:0032649 BP regulation of interferon-gamma production 15/1105 98/162410.002490505  
 0.027993965 0.022430447  
 AXL/CCR2/CCR7/HLA-DPA1/HLA-DPB1/IL12B/IL21/KLRC4-KLRK1/TLR7/TLR8/TLR9/IL36RN/P  
 GLYRP3/PGLYRP4/SCGB1A1 15  
 GO:0055001 BP muscle cell development 22/1105 169/16241 0.002517326  
 0.028230839 0.022620244  
 ACTN2/AGTR2/ANK2/BVES/CASQ1/CASQ2/COMP/FLNC/IGF1/LDB3/LMOD1/MYH11/MYOZ2  
 /P2RX2/PDGFRB/PGM5/PI16/RGS4/SGCD/SLC8A1/TNNT3/UCHL1 22

GO:0050878 BP regulation of body fluid levels 49/1105 477/16241 0.002540978  
0.028431173 0.022780764  
A2M/ADCY2/ADCY5/APOE/AXL/CDO1/CLEC1B/COL1A1/COL1A2/COL3A1/COMP/EHD2/F13A  
1/FBLN1/FGF10/FLG/FLNA/GP5/HEG1/KRT1/MMRN1/MYL9/NPR3/P2RX2/P2RY12/PRKCB/SELP/S  
ERPINE1/SERPING1/TAC1/THBS1/TIFAB/VIP/ZFPM2/ADTRP/APOH/C4BPB/CEL/CYP4F2/F2/FGA/F  
GB/FGG/FOXA2/GRHL3/HRG/P2RX3/SERPINA10/XDH 49

GO:0021761 BP limbic system development 16/1105 108/16241 0.002560251  
0.028581716 0.022901388  
ALK/EMX2/EPHA5/FGFR1/GLI3/KCNA1/KIRREL3/NEFL/NRP2/PTPRS/RELN/ZEB2/HSD3B1/LH  
X5/NEUROD1/NR2E1 16

GO:0070206 BP protein trimerization 10/1105 53/162410.00271337 0.030222392  
0.024215996  
ADIPOQ/COL1A1/COL1A2/COL6A1/COL6A2/EMILIN1/TCL1A/LCN2/OTC/P2RX3 10

GO:0052547 BP regulation of peptidase activity 44/1105 419/16241 0.002724129  
0.030273576 0.024257007  
A2M/ANTXR1/COL4A3/COL6A3/CR1/CRYAB/CST2/CST5/EPHA7/FBLN1/FN1/HMSD/ITIH5/N  
GF/NGFR/PI16/PZP/SERPINA3/SERPINE1/SERPINF1/SERPING1/SFRP2/SPOCK1/SPOCK3/THBS1/TI  
MP2/TIMP3/WNT9A/AMBP/CARD18/CSTL1/FABP1/HRG/KHDC1L/MAGEA3/PI3/R3HDML/SEMG1  
/SERPINA10/SERPINB13/SPINK4/WFDC10A/WFDC12/XDH 44

GO:0021602 BP cranial nerve morphogenesis 7/1105 29/162410.002744426 0.030293525  
0.024272992 EGR2/GLI3/KCNA2/NRP2/PHOX2A/PLXNA4/TIFAB 7

GO:0060536 BP cartilage morphogenesis 7/1105 29/162410.002744426 0.030293525  
0.024272992 COL14A1/COL6A1/COL6A2/COL6A3/HAND2/RSP02/VIT 7

GO:1905606 BP regulation of presynapse assembly 7/1105 29/162410.002744426  
0.030293525 0.024272992 CBLN1/DKK1/LRFN5/LRRTM1/NLGN1/SLITRK2/SLITRK3 7

GO:0035282 BP segmentation 15/1105 99/162410.002755115 0.030343327 0.024312897  
DKK1/EGR2/IRX1/MEOX2/NRP2/RIPPLY2/ROR2/SFRP1/SFRP2/TBX18/TIFAB/ZEB2/CDX1/CDX  
2/TDRD5 15

GO:1903036 BP positive regulation of response to wounding 11/1105 62/162410.002824447  
0.031020021 0.024855104  
MYLK/SELP/SERPINE1/SMOC2/THBS1/APOH/DUOX2/F2/HRG/REG3A/REG3G 11

GO:0006639 BP acylglycerol metabolic process 17/1105 119/16241 0.002832423  
0.031020021 0.024855104  
APOE/FABP4/APOA1/APOA2/APOA4/APOA5/APOBEC1/APOC3/APOH/FABP1/FABP2/FABP6/  
G6PC/MOGAT2/MOGAT3/PCK1/PCSK9 17

GO:0031639 BP plasminogen activation 6/1105 22/162410.002835503 0.031020021  
0.024855104 SERPINE1/THBS1/APOH/FGA/FGB/FGG 6

GO:0009914 BP hormone transport 35/1105 315/16241 0.002871771 0.03134698  
0.025117083  
ADCY5/ADCYAP1/ADIPOQ/AGTR1/AGTR2/BLK/CARTPT/CCKAR/CHRNA3/CNR1/EPHA5/FGFR  
1/GRP/KCNA5/KCNB1/PTPRN/RETN/SFRP1/TAC1/TACR2/VIP/ABCC2/FGA/FGB/FGF23/FGG/FOXA2  
/HTR2C/KISS1/NEUROD1/NPFF/REN/RFX6/TFR2/TTR 35

GO:0002063 BP chondrocyte development 9/1105 45/162410.002889595 0.031401965  
0.025161141 COL11A1/COL14A1/COL6A1/COL6A2/COL6A3/COMP/SFRP2/SULF1/VIT 9

GO:0048483 BP autonomic nervous system development 9/1105 45/162410.002889595  
0.031401965 0.025161141  
EDNRA/EGR2/FN1/HAND2/NRP2/PHOX2A/PLXNA4/SOX10/VCAM1 9

GO:0010594 BP regulation of endothelial cell migration 20/1105 150/16241 0.002919254  
0.031654255 0.02536329  
ADGRA2/AGTR2/AKT3/ANGPT4/APOE/CXCL13/DCN/FGF2/FGFR1/MEOX2/NRP2/SERPINF1/SLIT2/SMOC2/SPARC/THBS1/APOH/FGFBP1/HRG/NR2E1 20

GO:2001023 BP regulation of response to drug 14/1105 90/162410.002935316  
0.031758304 0.025446661  
ATP1A2/CHRNA3/CHRNA6/CNR1/CXCL12/HTR2A/KCNA2/RETN/RGS4/SYT11/SYT4/SYT6/TACR2/GABRA4 14

GO:0010631 BP epithelial cell migration 31/1105 270/16241 0.002960311 0.031954265  
0.025603677  
ADGRA2/AGTR2/AKT3/ANGPT4/APOE/CXCL13/CYP1B1/DCN/FGF10/FGF2/FGF7/FGFR1/GREM1/ITGB2/MEOX2/NRP2/PECAM1/SERPINF1/SLIT2/SMOC2/SPARC/TAC1/THBS1/ZEB2/ADTRP/APOA1/APOH/FGFBP1/HRG/NR2E1/PRSS3 31

GO:0150063 BP visual system development 39/1105 362/16241 0.002966438  
0.031954265 0.025603677  
ABCB5/C1QA/CHRD1/COL5A1/COL8A1/COL8A2/CRYAB/CYP1B1/EFEMP1/FBN1/FGF10/FOX P2/GLI3/GPM6A/KERA/MAB21L1/MAB21L2/NTRK2/P2RY12/PDGFRB/RORB/SALL2/SERPINF1/TENM3/THY1/TUB/UNC45B/VIM/WNT9A/WNT9B/ZEB2/BMP7/CRYBA2/GNGT1/GRHL3/IHH/NEUROD1/NR2E1/SIX3 39

GO:0016064 BP immunoglobulin mediated immune response 16/1105 110/16241  
0.003092466 0.033133926 0.026548892  
C1QA/C1QB/C1QC/C1R/C1S/C7/CR1/CR2/FCER2/FCGR2B/FGL2/GAPT/PTPRC/SERPING1/TLR8/C4BPB 16

GO:0006638 BP neutral lipid metabolic process 17/1105 120/16241 0.003096187  
0.033133926 0.026548892  
APOE/FABP4/APOA1/APOA2/APOA4/APOA5/APOBEC1/APOC3/APOH/FABP1/FABP2/FABP6/G6PC/MOGAT2/MOGAT3/PCK1/PCSK9 17

GO:0022612 BP gland morphogenesis 17/1105 120/16241 0.003096187 0.033133926  
0.026548892  
AR/CSF1R/CYP7B1/FGF10/FGF7/FGFR1/GLI2/GLI3/IGFBP5/LIMS2/NRG3/SFRP1/SULF1/TGFB3/TNC/BMP7/HOXB13 17

GO:0060350 BP endochondral bone morphogenesis 12/1105 72/162410.003189332  
0.033900739 0.027163309  
ANXA6/COL14A1/COL1A1/COL6A1/COL6A2/COL6A3/COMP/NPPC/TMEM119/VIT/HOXA11/IHH 12

GO:0048167 BP regulation of synaptic plasticity 23/1105 183/16241 0.003204504  
0.033900739 0.027163309  
APOE/CAMK2A/CBLN1/EGR2/FGF14/GRIA1/IGSF11/JPH4/KCNB1/LRRTM1/MAP1A/NETO1/NLGN1/NTRK2/RELN/SHANK1/SHISA8/SORCS2/SORCS3/SYT4/TNR/NR2E1/P2RX3 23

GO:0060346 BP bone trabecula formation 4/1105 10/162410.003210506 0.033900739  
0.027163309 COL1A1/GREM1/MMP2/SFRP1 4

GO:0061365 BP positive regulation of triglyceride lipase activity 4/1105 10/16241  
0.003210506 0.033900739 0.027163309 GPIHBP1/APOA4/APOA5/APOH 4

GO:0061035 BP regulation of cartilage development 11/1105 63/162410.003216153  
0.033900739 0.027163309  
EFEMP1/FRZB/GDF5/GDF6/GLI2/GLI3/GREM1/NKX3-2/SIX2/WNT9A/HOXA11 11

GO:0086003 BP cardiac muscle cell contraction 11/1105 63/162410.003216153  
0.033900739 0.027163309  
ANK2/ATP1A2/CACNA1G/CTNNA3/FLNA/KCNA5/KCNE4/KCNJ5/PLN/SCN2B/SGCD 11

GO:1900449 BP regulation of glutamate receptor signaling pathway 11/1105 63/16241  
0.003216153 0.033900739 0.027163309  
ACTN2/CACNG7/CCR2/FRRS1L/GRIA1/NEFL/NETO1/NLGN1/RELN/SHANK1/SHISA8 11

GO:0006816 BP calcium ion transport 43/1105 411/16241 0.003237487 0.034052537  
0.027284939  
ADCYAP1R1/ANK2/ANXA6/ATP1A2/ATP2B2/CACNA1G/CACNG7/CAMK2A/CASQ1/CASQ2/CC  
L19/CCL21/CCR7/CXCL12/CXCL9/FGF14/FGF2/GNAO1/GPM6A/HTR2A/JPH2/JPH4/MS4A1/MYLK/  
NALCN/P2RX2/P2RY12/PDGFRB/PLN/PRKCB/PTPRC/RGS4/SLC8A1/STAC/THY1/TLR9/ATP2C2/EPO  
/F2/HTR2C/P2RX3/SEMGI/TRPM5 43

GO:0034116 BP positive regulation of heterotypic cell-cell adhesion 5/1105 16/16241  
0.003351114 0.034688706 0.027794675 THY1/BMP7/FGA/FGB/FGG 5

GO:0043691 BP reverse cholesterol transport 5/1105 16/162410.003351114 0.034688706  
0.027794675 APOE/APOA1/APOA2/APOA4/APOC3 5

GO:0060572 BP morphogenesis of an epithelial bud 5/1105 16/162410.003351114  
0.034688706 0.027794675 AR/FGF10/GLI2/SULF1/BMP75

GO:0097107 BP postsynaptic density assembly 5/1105 16/162410.003351114  
0.034688706 0.027794675 CBLN1/LRRTM1/NRXN2/PTPRS/SHANK1 5

GO:1900746 BP regulation of vascular endothelial growth factor signaling pathway 5/1105  
16/162410.003351114 0.034688706 0.027794675 ADGRA2/DCN/SMOC2/HRG/XDH 5

GO:0032368 BP regulation of lipid transport 15/1105 101/16241 0.003354094  
0.034688706 0.027794675  
ADIPOQ/AGTR1/AGTR2/APOE/RETN/TAC1/THBS1/APOA1/APOA2/APOA4/APOA5/APOC3/CY  
P4F2/PCSK9/REN 15

GO:0007162 BP negative regulation of cell adhesion 30/1105 261/16241 0.00336827  
0.034688706 0.027794675  
ADIPOQ/CCL21/CLEC4G/COL1A1/CXCL12/CYP1B1/FBLN1/FCGR2B/FGL2/GLI3/GPNMB/LRRC  
32/MYOC/PLA2G2D/PLXNA4/PTPRC/SERPINE1/SPOCK1/THBS1/TNC/TNR/VSIG4/ADTRP/APOA1/F  
GG/HRG/IHH/MUC21/PLA2G2F/SCGB1A1 30

GO:0021772 BP olfactory bulb development 7/1105 30/162410.003372813 0.034688706  
0.027794675 CRTAC1/CSF1R/SLIT2/EFNA2/FEZF1/NR2E1/SALL1 7

GO:0071295 BP cellular response to vitamin 7/1105 30/162410.003372813 0.034688706  
0.027794675 COL1A1/FOLR2/PENK/SFRP1/TNC/FGF23/FOLR1 7

GO:0099174 BP regulation of presynapse organization 7/1105 30/162410.003372813  
0.034688706 0.027794675 CBLN1/DKK1/LRFN5/LRRTM1/NLGN1/SLITRK2/SLITRK3 7

GO:0018108 BP peptidyl-tyrosine phosphorylation 38/1105 353/16241 0.003375652  
0.034688706 0.027794675

ADIPOQ/ALK/ANGPT4/AXL/BLK/CNTN1/CSF1R/DDR2/EFEMP1/EPHA3/EPHA5/EPHA6/EPHA7  
 /FGF10/FGF7/FGFR1/FLT3/GHR/GREM1/HTR2A/IGF1/IL12B/IL21/IL31RA/ITGB2/NTRK2/PDGFRB/  
 PECAM1/PTPRC/RELN/ROR2/SFRP1/SFRP2/SLA/THBS4/THY1/EPO/HRG 38  
 GO:0009952 BP anterior/posterior pattern specification 26/1105 217/16241 0.003497177  
 0.035660613 0.028573425  
 BARX1/DKK1/EMX2/EN1/GLI2/GLI3/HEYL/MEOX2/RIPPLY2/ROR2/SFRP1/SFRP2/SIX2/TBX18/  
 TIFAB/ZEB2/CDX1/CDX2/FEZF1/FOXA2/FOXH1/HOXA11/HOXC13/NEUROD1/SIX3/TDRD5 26  
 GO:0010712 BP regulation of collagen metabolic process 8/1105 38/16241 0.003498715  
 0.035660613 0.028573425 EMILIN1/MFAP4/NPPC/PDGFRB/TGFB3/VIM/F2/IHH 8  
 GO:0050892 BP intestinal absorption 8/1105 38/16241 0.003498715 0.035660613  
 0.028573425 APOA1/APOA2/APOA4/APOA5/CEL/FABP1/FABP2/MOGAT2 8  
 GO:0090132 BP epithelium migration 31/1105 273/16241 0.00349927 0.035660613  
 0.028573425  
 ADGRA2/AGTR2/AKT3/ANGPT4/APOE/CXCL13/CYP1B1/DCN/FGF10/FGF2/FGF7/FGFR1/GRE  
 M1/ITGB2/MEOX2/NRP2/PECAM1/SERPINF1/SLIT2/SMOC2/SPARC/TAC1/THBS1/ZEB2/ADTRP/AP  
 OA1/APOH/FGFBP1/HRG/NR2E1/PRSS3 31  
 GO:0035051 BP cardiocyte differentiation 19/1105 142/16241 0.003523934  
 0.035837603 0.02871524  
 ACTN2/AGTR2/BVES/DKK1/GREM1/HAND2/IGF1/MYH11/MYOCN/PDGFRB/PI16/PRICKLE1/  
 RGS4/SGCD/SLC8A1/TENM4/VCAM1/BMP7/FOLR1 19  
 GO:0050830 BP defense response to Gram-positive bacterium 14/1105 92/16241  
 0.003607214 0.036496801 0.029243429  
 CTSG/KLRC4-KLRK1/MPEG1/SSC5D/TNFSF8/C10orf99/DEFA1/DEFB1/DEFB4A/DMBT1/LYZL4  
 /PGLYRP3/PGLYRP4/REG3G 14  
 GO:0002861 BP regulation of inflammatory response to antigenic stimulus 6/1105  
 23/16241 0.003618474 0.036496801 0.029243429  
 ADCYAP1/CCR7/CNR1/FCGR2B/IL12B/NPY5R 6  
 GO:0045822 BP negative regulation of heart contraction 6/1105 23/16241 0.003618474  
 0.036496801 0.029243429 AGTR2/ATP1A2/PLN/SPX/TAC1/NPFF 6  
 GO:2000050 BP regulation of non-canonical Wnt signaling pathway 6/1105 23/16241  
 0.003618474 0.036496801 0.029243429 DACT1/DKK1/RSPO3/SFRP1/SFRP2/SFRP4 6  
 GO:0019748 BP secondary metabolic process 11/1105 64/16241 0.00365028 0.036667026  
 0.029379824  
 CYP1B1/FMO1/FMO2/ZEB2/ABCC2/AKR1B10/AKR1C4/DDC/SLC45A2/UGT1A7/UGT1A8 11  
 GO:0048844 BP artery morphogenesis 11/1105 64/16241 0.00365028 0.036667026  
 0.029379824  
 AKT3/APOE/COL3A1/COMP/HAND2/MYLK/MYOCN/PDGFRB/PRRX1/FOLR1/FOXH1 11  
 GO:0015850 BP organic hydroxy compound transport 28/1105 240/16241 0.003666351  
 0.036753299 0.029448951  
 ADIPOQ/AGTR1/AGTR2/APOE/CARTPT/CHRNA6/CNR1/CXCL12/HTR2A/KCNA2/KCNB1/P2RY  
 12/SLC6A2/SYT11/SYT4/SYT6/TAC1/VIP/ABCC2/AKR1C4/APOA1/APOA2/APOA4/APOA5/APOC3/C  
 EL/PCSK9/REN 28  
 GO:0048880 BP sensory system development 39/1105 367/16241 0.003758853  
 0.037603837 0.030130453

ABCB5/C1QA/CHRD1/COL5A1/COL8A1/COL8A2/CRYAB/CYP1B1/EFEMP1/FBN1/FGF10/FOX  
 P2/GLI3/GPM6A/KERA/MAB21L1/MAB21L2/NTRK2/P2RY12/PDGFRB/RORB/SALL2/SERPINF1/TE  
 NM3/THY1/TUB/UNC45B/VIM/WNT9A/WNT9B/ZEB2/BMP7/CRYBA2/GNGT1/GRHL3/IHH/NEUR  
 OD1/NR2E1/SIX3 39  
 GO:2000177 BP regulation of neural precursor cell proliferation 13/1105 83/16241  
 0.003836879 0.038306405 0.030693393  
 ADCYAP1/CDH2/FLNA/GLI2/GLI3/LIMS2/SOX10/EMX1/LHX5/NR2E1/RASSF10/SIX3/TRIM71  
 13  
 GO:0002250 BP adaptive immune response 42/1105 403/16241 0.00384583  
 0.038317889 0.030702594  
 C1QA/C1QB/C1QC/C1R/C1S/C7/CCL19/CCR2/CD1C/CLC/CLEC10A/CLEC4C/CLEC4G/CLEC6A/  
 CR1/CR2/CXCL13/FCER2/FCGR2B/FGL2/GAPT/HLA-DOA/HLA-DPA1/HLA-DPB1/HLA-DQA1/HLA-D  
 QA2/HLA-DQB2/IL12B/JAM3/KLRK4-KLRK1/LAIR1/LILRB4/PRKCB/PTPRC/SERPING1/SIGLEC10/TLR  
 8/TNFRSF13B/BTNL8/C4BPB/FGA/FGB 42  
 GO:0018212 BP peptidyl-tyrosine modification 38/1105 356/16241 0.003894054  
 0.038719824 0.031024649  
 ADIPOQ/ALK/ANGPT4/AXL/BLK/CNTN1/CSF1R/DDR2/EFEMP1/EPHA3/EPHA5/EPHA6/EPHA7  
 /FGF10/FGF7/FGFR1/FLT3/GHR/GREM1/HTR2A/IGF1/IL12B/IL21/IL31RA/ITGB2/NTRK2/PDGFRB/  
 PECAM1/PTPRC/RELN/ROR2/SFRP1/SFRP2/SLA/THBS4/THY1/EPO/HRG 38  
 GO:0046683 BP response to organophosphorus 18/1105 133/16241 0.003926465  
 0.038951126 0.031209982  
 ADIPOQ/CDO1/CNGA3/COL1A1/IGFBP5/P2RX2/P2RY12/PDE3A/PENK/PTPRN/SLC8A1/SPAR  
 C/AGXT/DUOX2/P2RX3/PCK1/REN/SLC26A3 18  
 GO:0030514 BP negative regulation of BMP signaling pathway 9/1105 47/16241  
 0.003933176 0.038951126 0.031209982  
 CHRD1/DKK1/FBN1/GREM1/GREM2/HTRA3/RBPMS2/SFRP1/SFRP2 9  
 GO:0048762 BP mesenchymal cell differentiation 25/1105 208/16241 0.003969325  
 0.039230026 0.031433454  
 ANXA6/COL1A1/DACT3/EDNRA/EPHA3/FGF10/FGFR1/FN1/FRZB/GREM1/HAND2/HEYL/NRP  
 2/RANBP3L/SFRP1/SFRP2/SIX2/SOX10/TGFB11/TGFB3/WWTR1/ZEB2/BMP7/FOLR1/FOXA2 25  
 GO:0045471 BP response to ethanol 17/1105 123/16241 0.004012284 0.039574982  
 0.031709853  
 ADCYAP1/ADCYAP1R1/ADIPOQ/CDO1/CNR1/CYBB/HTR3A/KCNMB1/NPPC/PENK/RGS4/SPA  
 RC/TNC/VCAM1/ADH7/APOBEC1/UGT1A1 17  
 GO:0023061 BP signal release 46/1105 452/16241 0.00403346 0.039704116  
 0.031813322  
 ADCY5/ADCYAP1/ADIPOQ/AGTR1/AGTR2/BLK/CAMK2A/CARTPT/CCKAR/CHAT/CHRM2/CHR  
 NA3/CHRNA6/CNR1/EPHA5/FGFR1/GRIK5/GRP/HTR2A/KCNA5/KCNB1/NLGN1/NRXN2/PRKCB/PT  
 PRN/RETN/SFRP1/SLC18A3/SYT11/SYT4/SYT6/TAC1/TACR2/VIP/FGA/FGB/FGF23/FGG/FOXA2/HT  
 R2C/KISS1/NEUROD1/NPFF/REN/RFX6/TFR246  
 GO:0019724 BP B cell mediated immunity 16/1105 113/16241 0.004059471  
 0.039800644 0.031890667  
 C1QA/C1QB/C1QC/C1R/C1S/C7/CR1/CR2/FCER2/FCGR2B/FGL2/GAPT/PTPRC/SERPING1/TLR  
 8/C4BPB 16

GO:0042089 BP cytokine biosynthetic process 16/1105 113/16241 0.004059471  
0.039800644 0.031890667  
AKAP12/CCR2/CEBPE/CMA1/CYBB/ELANE/IL12B/IL21/PTPRC/THBS1/TLR7/TLR8/TLR9/APOA  
2/IGF2BP1/IL17F 16

GO:0050806 BP positive regulation of synaptic transmission 21/1105 165/16241  
0.004075651 0.03987968 0.031953995  
ADCYAP1/APOE/CACNG7/CCR2/CNR1/IGSF11/LAMA2/LRRTM1/NETO1/NLGN1/NTRK2/RELN  
/RETN/RGS4/ROR2/SHANK1/TAC1/TACR2/TNR/KISS1/NR2E1 21

GO:0021988 BP olfactory lobe development 7/1105 31/16241 0.004105094 0.039929152  
0.031993635 CRTAC1/CSF1R/SLIT2/EFNA2/FEZF1/NR2E1/SALL1 7

GO:0034694 BP response to prostaglandin 7/1105 31/16241 0.004105094 0.039929152  
0.031993635 CCL19/CCL21/CCR7/PTGDR/PTGFR/SFRP1/TNC 7

GO:0043267 BP negative regulation of potassium ion transport 7/1105 31/16241  
0.004105094 0.039929152 0.031993635  
ACTN2/ADCYAP1/CASQ2/HTR2A/KCNE4/RGS4/VIP 7

GO:0033627 BP cell adhesion mediated by integrin 11/1105 65/16241 0.004130005  
0.040071139 0.032107403  
CCL21/CXCL13/CYP1B1/FBN1/ITGA11/ITGB2/ITGBL1/P2RY12/SERPINE1/SFRP2/HRG11

GO:0014046 BP dopamine secretion 8/1105 39/16241 0.004144165 0.040071139  
0.032107403 CHRNA6/CNR1/CXCL12/HTR2A/KCNA2/SYT11/SYT4/SYT6 8

GO:0014059 BP regulation of dopamine secretion 8/1105 39/16241 0.004144165  
0.040071139 0.032107403 CHRNA6/CNR1/CXCL12/HTR2A/KCNA2/SYT11/SYT4/SYT6 8

GO:0050803 BP regulation of synapse structure or activity 26/1105 220/16241  
0.004206361 0.040592621 0.032525246  
ADGRB3/APOE/CBLN1/CDH2/DKK1/EPHA7/FCGR2B/FLRT2/GAP43/GPM6A/IL10RA/LRFN5/L  
RRTM1/NLGN1/NRP2/NTRK2/PTPRS/RELN/SLITRK2/SLITRK3/SLITRK4/SLITRK5/SPARC/SYNDIG1/T  
HBS2/TUBA1A 26

GO:0046677 BP response to antibiotic 34/1105 311/16241 0.004222796 0.040671325  
0.032588308  
ADCY2/ADCY5/ADCYAP1/ADCYAP1R1/ADIPOQ/AOC3/AXL/CCR4/CDO1/CNR1/COL1A1/CRYA  
B/CYBB/CYP1B1/GNAO1/HTR3A/KCNA5/KCNMB1/NEFL/NPPC/PDGFRB/PENK/RGS4/SLC8A1/SPA  
RC/TNC/VCAM1/ADH7/APOBEC1/FABP1/LCN2/PLA2G4F/SCGB1A1/UGT1A1 34

GO:0002792 BP negative regulation of peptide secretion 18/1105 134/16241  
0.004255348 0.040824747 0.03271124  
APOE/CARTPT/CD22/FCGR2B/FN1/KCNB1/LRRC32/SFRP1/SSC5D/SYT11/SYT4/TLR8/ADTRP/  
APOA1/APOA2/CARD18/IL36RN/NPFF 18

GO:0097553 BP calcium ion transmembrane import into cytosol 18/1105 134/16241  
0.004255348 0.040824747 0.03271124  
ANK2/ATP1A2/CASQ1/CASQ2/CCL19/CCL21/CCR7/CXCL9/FGF2/HTR2A/JPH2/JPH4/PLN/PTP  
RC/SLC8A1/THY1/F2/HTR2C 18

GO:0002690 BP positive regulation of leukocyte chemotaxis 13/1105 84/16241 0.004263777  
0.040825875 0.032712144  
CCL19/CCL21/CCR2/CCR7/CMKLR1/CXCL12/CXCL13/SERPINE1/THBS1/THBS4/CXCL17/S100A  
14/S100A7 13

GO:0042107 BP cytokine metabolic process 16/1105 114/16241 0.004432105  
0.042355062 0.03393742  
AKAP12/CCR2/CEBPE/CMA1/CYBB/ELANE/IL12B/IL21/PTPRC/THBS1/TLR7/TLR8/TLR9/APOA  
2/IGF2BP1/IL17F 16

GO:0006883 BP cellular sodium ion homeostasis 5/1105 17/16241 0.004484577  
0.042443623 0.034008381 AGTR2/ATP1A2/ATP1A4/C7/SLC8A1 5

GO:0045072 BP regulation of interferon-gamma biosynthetic process 5/1105 17/16241  
0.004484577 0.042443623 0.034008381 IL12B/IL21/TLR7/TLR8/TLR9 5

GO:0060973 BP cell migration involved in heart development 5/1105 17/16241  
0.004484577 0.042443623 0.034008381 BVES/HAND2/PDGFRB/BMP7/FOLR1 5

GO:0071625 BP vocalization behavior 5/1105 17/16241 0.004484577 0.042443623  
0.034008381 FOXP2/NRXN2/NRXN3/SHANK1/TIFAB 5

GO:1902547 BP regulation of cellular response to vascular endothelial growth factor stimulus  
5/1105 17/16241 0.004484577 0.042443623 0.034008381  
ADGRA2/DCN/SMOC2/HRG/XDH 5

GO:0042310 BP vasoconstriction 12/1105 75/16241 0.004498314 0.042491764  
0.034046954  
ACTA2/AGTR1/ATP1A2/COMP/EDNRA/HTR2A/HTR7/KCNA5/SLC8A1/FGA/FGB/FGG 12

GO:0050673 BP epithelial cell proliferation 39/1105 371/16241 0.004516937  
0.042535137 0.034081707  
AGTR1/AKT3/APOE/AR/COL8A1/COL8A2/CXCL12/CYP7B1/FGF10/FGF2/FGF7/FGFR1/FOXP2/  
GDF5/IGF1/IGFBP4/IGFBP5/LIMS2/NGFR/NRP2/PTPRN/SERPINF1/SFRP1/SFRP2/SPARC/SULF1/T  
HBS1/THBS4/VIP/APOA1/APOH/FGFBP1/FOXN1/IHH/KRT4/REG1A/REG3A/REG3G/XDH 39

GO:0021511 BP spinal cord patterning 6/1105 24/16241 0.004551141 0.042535137  
0.034081707 GLI2/GLI3/RELN/EVX1/NKX6-2/RFX4 6

GO:0071677 BP positive regulation of mononuclear cell migration 6/1105 24/16241  
0.004551141 0.042535137 0.034081707  
CCR2/CXCL12/SERPINE1/CXCL17/S100A14/S100A7 6

GO:1904861 BP excitatory synapse assembly 6/1105 24/16241 0.004551141 0.042535137  
0.034081707 CBLN1/LRRTM1/NLGN1/NRXN2/PTPRS/SHANK1 6

GO:0016339 BP calcium-dependent cell-cell adhesion via plasma membrane cell adhesion  
molecules 9/1105 48/16241 0.004554862 0.042535137 0.034081707  
CDH10/CDH11/CDH19/CDH2/NLGN1/SELP/CDH16/CDH17/DSG1 9

GO:1903727 BP positive regulation of phospholipid metabolic process 9/1105 48/16241  
0.004554862 0.042535137 0.034081707  
CCL19/CCL21/CCR7/FGF2/FLT3/HTR2A/P2RY12/PDGFRB/HTR2C 9

GO:0050729 BP positive regulation of inflammatory response 18/1105 135/16241  
0.004606598 0.042936644 0.034403419  
AGTR1/CCL14/CCR2/CCR7/CNR1/FABP4/IL12B/IL21/NPY5R/PTGER3/SERPINE1/SUCNR1/TAC  
1/TLR7/TLR9/CREB3L3/IL17A/IL17F 18

GO:0030100 BP regulation of endocytosis 30/1105 267/16241 0.00469218  
0.043651491 0.034976197  
ADIPOQ/APOE/AXL/CCL19/CCL21/CD22/CLIP3/DKK1/EPHA3/FCGR2B/GREM1/LRRTM1/NLG  
N1/PTPRC/RAB31/RSP01/SERPINE1/SFRP4/SNAP91/STON1/SYT11/SYT4/TUB/APOA1/APOA2/AP

OA5/APOC3/C4BPB/PCSK9/TFR2 30

GO:0002862 BP negative regulation of inflammatory response to antigenic stimulus 4/1105  
11/162410.004775366 0.043926217 0.035196324 ADCYAP1/FCGR2B/IL12B/NPY5R 4

GO:0021521 BP ventral spinal cord interneuron specification 4/1105 11/162410.004775366  
0.043926217 0.035196324 GLI2/GLI3/EVX1/NKX6-2 4

GO:0021604 BP cranial nerve structural organization 4/1105 11/162410.004775366  
0.043926217 0.035196324 EGR2/KCNA2/NRP2/PLXNA4 4

GO:0060573 BP cell fate specification involved in pattern specification 4/1105 11/16241  
0.004775366 0.043926217 0.035196324 GLI2/GLI3/EVX1/NKX6-2 4

GO:0098883 BP synapse pruning 4/1105 11/162410.004775366 0.043926217  
0.035196324 C1QA/C1QB/C1QC/DKK1 4

GO:1902093 BP positive regulation of flagellated sperm motility 4/1105 11/16241  
0.004775366 0.043926217 0.035196324 TAC4/TACR1/TACR2/DEFB1 4

GO:0043537 BP negative regulation of blood vessel endothelial cell migration 7/1105  
32/162410.004951617 0.045377503 0.036359181  
AGTR2/ANGPT4/APOE/FGF2/MEOX2/THBS1/HRG 7

GO:0043552 BP positive regulation of phosphatidylinositol 3-kinase activity 7/1105  
32/162410.004951617 0.045377503 0.036359181  
CCL19/CCL21/CCR7/FGF2/FLT3/P2RY12/PDGFRB 7

GO:0071229 BP cellular response to acid chemical 24/1105 201/16241 0.005109063  
0.046733176 0.037445428  
BRINP3/COL1A1/COL1A2/COL3A1/COL6A1/CPEB1/CYBB/EPHA3/FOLR2/KCNK4/KCNMB1/M  
MP2/NTRK2/PTGDR/PTGFR/RORB/SERPINF1/SFRP1/TNC/WNT9A/WNT9B/AKR1C4/FOLR1/PCK1  
24

GO:0014074 BP response to purine-containing compound 19/1105 147/16241  
0.005165917 0.047165398 0.037791751  
ADIPOQ/CASQ2/CDO1/CNGA3/COL1A1/IGFBP5/P2RX2/P2RY12/PDE3A/PENK/PTPRN/SLC8A  
1/SPARC/AGXT/DUOX2/P2RX3/PCK1/REN/SLC26A3 19

GO:1900024 BP regulation of substrate adhesion-dependent cell spreading 9/1105  
49/162410.005250392 0.04784773 0.038338475  
FBLN1/FLNA/LIMS2/MYOC/APOA1/FGA/FGB/FGG/OLFM4 9

GO:0051591 BP response to cAMP 14/1105 96/162410.005327002 0.048455986  
0.038825847  
ADIPOQ/CDO1/CNGA3/COL1A1/IGFBP5/PENK/PTPRN/SLC8A1/SPARC/AGXT/DUOX2/PCK1/R  
EN/SLC26A3 14

GO:0006898 BP receptor-mediated endocytosis 28/1105 247/16241 0.005461509  
0.049496181 0.039659314  
APOE/CACNG7/CCL19/CCL21/CLEC9A/COLEC12/DKK1/FCGR2B/FOLR2/GREM1/GRIA1/ITGB2  
/LRRTM1/MRC1/RAB31/RSP01/SERPINE1/SFRP4/SNAP91/SPARC/SYT11/AMBP/APOA1/APOA5/A  
POC3/FOLR1/PCSK9/TFR2 28

GO:0022409 BP positive regulation of cell-cell adhesion 28/1105 247/16241 0.005461509  
0.049496181 0.039659314  
CCL19/CCL21/CCR2/CCR7/CLECL1/CXCL13/ELANE/GLI2/GLI3/HLA-DPA1/HLA-DPB1/IGF1/IL1  
2B/IL21/ITGB2/KLRC4-KLRK1/LILRB4/PTPRC/THY1/VCAM1/BMP7/EPO/FGA/FGB/FGG/FOXA2/HH

LA2/IHH 28

GO:0050709 BP negative regulation of protein secretion 17/1105 127/16241  
0.005569576 0.050358838 0.040350526  
APOE/CD22/FCGR2B/FN1/KCNB1/LRRC32/SFRP1/SSC5D/SYT11/SYT4/TLR8/ADTRP/APOA1/A  
POA2/CARD18/IL36RN/NPFF 17

GO:0046879 BP hormone secretion 33/1105 305/16241 0.0055818 0.050358838  
0.040350526  
ADCY5/ADCYAP1/ADIPOQ/AGTR1/AGTR2/BLK/CARTPT/CCKAR/CHRNA3/CNR1/EPHA5/FGFR  
1/GRP/KCNA5/KCNB1/PTPRN/RETN/SFRP1/TAC1/TACR2/VIP/FGA/FGB/FGF23/FGG/FOXA2/HTR2C  
/KISS1/NEUROD1/NPFF/REN/RFX6/TFR2 33

GO:0032637 BP interleukin-8 production 12/1105 77/16241 0.005587453 0.050358838  
0.040350526  
ADIPOQ/BPI/ELANE/FCN1/PTPRC/SERPINE1/SSC5D/TLR7/TLR8/TLR9/APOA2/IL17F 12

GO:0032369 BP negative regulation of lipid transport 6/1105 25/16241 0.005649408  
0.050731065 0.040648777 AGTR2/THBS1/APOA2/APOC3/CYP4F2/PCSK9 6

GO:0071624 BP positive regulation of granulocyte chemotaxis 6/1105 25/16241  
0.005649408 0.050731065 0.040648777 CCL19/CCL21/CCR7/THBS4/S100A14/S100A7  
6

GO:0051928 BP positive regulation of calcium ion transport 16/1105 117/16241  
0.005720793 0.051278346 0.041087291  
ADCYAP1R1/ANK2/CAMK2A/CASQ1/CXCL12/CXCL9/FGF14/JPH2/MYLK/P2RX2/PDGFRB/STA  
C/THY1/ATP2C2/F2/P2RX3 16

GO:0034446 BP substrate adhesion-dependent cell spreading 14/1105 97/16241  
0.005846474 0.051726156 0.041446103  
ANTXR1/AXL/BVES/FBLN1/FERMT2/FLNA/FN1/LIMS2/MYOC/APOA1/FGA/FGB/FGG/OLFM4  
14

GO:0001991 BP regulation of systemic arterial blood pressure by circulatory renin-angiotensin  
5/1105 18/16241 0.005866302 0.051726156 0.041446103  
AGTR2/CMA1/CTSG/SUCNR1/REN 5

GO:0003414 BP chondrocyte morphogenesis involved in endochondral bone morphogenesis  
5/1105 18/16241 0.005866302 0.051726156 0.041446103  
COL14A1/COL6A1/COL6A2/COL6A3/VIT 5

GO:0003429 BP growth plate cartilage chondrocyte morphogenesis 5/1105 18/16241  
0.005866302 0.051726156 0.041446103 COL14A1/COL6A1/COL6A2/COL6A3/VIT 5

GO:0007597 BP blood coagulation, intrinsic pathway 5/1105 18/16241 0.005866302  
0.051726156 0.041446103 A2M/GP5/SERPING1/APOH/F2 5

GO:0034375 BP high-density lipoprotein particle remodeling 5/1105 18/16241 0.005866302  
0.051726156 0.041446103 APOE/APOA1/APOA2/APOA4/APOC3 5

GO:0042095 BP interferon-gamma biosynthetic process 5/1105 18/16241 0.005866302  
0.051726156 0.041446103 IL12B/IL21/TLR7/TLR8/TLR9 5

GO:0048557 BP embryonic digestive tract morphogenesis 5/1105 18/16241 0.005866302  
0.051726156 0.041446103 FGF10/GLI3/RBPMS2/SIX2/IHH 5

GO:0090171 BP chondrocyte morphogenesis 5/1105 18/16241 0.005866302 0.051726156  
0.041446103 COL14A1/COL6A1/COL6A2/COL6A3/VIT 5

GO:0010657 BP muscle cell apoptotic process 11/1105 68/162410.005876058 0.051726156  
0.041446103  
ADCYAP1/CAMK2A/HAND2/HSPB6/IGF1/IL12B/MYOCD/SFRP2/APOH/BMP7/GNGT1 11

GO:0003382 BP epithelial cell morphogenesis 7/1105 33/162410.005922914 0.051767535  
0.041479259 AR/COL4A4/FRMD6/HEG1/PALLD/PECAM1/IHH 7

GO:0010092 BP specification of animal organ identity 7/1105 33/162410.005922914  
0.051767535 0.041479259 AR/DKK1/FGF10/FGFR1/GLI3/FOXH1/HOXA11 7

GO:0014072 BP response to isoquinoline alkaloid 7/1105 33/162410.005922914  
0.051767535 0.041479259 CNR1/GNAO1/PENK/RGS4/TAC1/NPFF/PPP1R1B 7

GO:0043278 BP response to morphine 7/1105 33/162410.005922914 0.051767535  
0.041479259 CNR1/GNAO1/PENK/RGS4/TAC1/NPFF/PPP1R1B 7

GO:0050663 BP cytokine secretion 26/1105 226/16241 0.005989923 0.052260215  
0.041874024  
AGTR2/AKAP12/C1QTNF4/CCL19/CCR7/CLEC6A/CLEC9A/CLECL1/CRTAM/CSF1R/FCGR2B/FC  
N1/FN1/LRRC32/SSC5D/SYT11/TLR8/TLR9/APOA1/APOA2/CARD18/IL17A/IL17F/IL36RN/ORM1/O  
RM226

GO:0006869 BP lipid transport 35/1105 330/16241 0.006014956 0.052385571  
0.041974466  
ABCA8/ABCA9/ADIPOQ/AGTR1/AGTR2/APOE/ATP8B2/FABP4/PLA2G2D/RETN/SPX/TAC1/TH  
BS1/ABCC2/AKR1C4/APOA1/APOA2/APOA4/APOA5/APOC3/APOH/ATP10B/CEL/CYP4F2/FABP1/F  
ABP2/FABP6/GLTPD2/LCN12/MTP/PCSK9/PLA2G12B/PLA2G2F/PLA2G4F/REN 35

GO:0045123 BP cellular extravasation 10/1105 59/162410.006046888 0.052533046  
0.042092633 ADD2/CCL21/CCR2/CXCL12/ELANE/ITGB2/PECAM1/SELP/THY1/VCAM1 10

GO:0010769 BP regulation of cell morphogenesis involved in differentiation 32/1105  
295/16241 0.006053279 0.052533046 0.042092633  
ADGRB3/APOE/CDH2/CHODL/CHRNA3/CXCL12/EPHA7/FBLN1/FLNA/FN1/LIMS2/LRRC4C/M  
AG/MYOC/NEFL/NGF/NGFR/NLGN1/NTRK2/PLXNA4/PTPRS/RELN/SLIT2/THY1/TNR/ZEB2/APOA1/  
FGA/FGB/FGG/NR2E1/OLFM4 32

GO:0007188 BP adenylate cyclase-modulating G protein-coupled receptor signaling pathway  
25/1105 215/16241 0.006075601 0.052541113 0.042099096  
ADCY2/ADCY5/ADCYAP1/ADGRB3/ADGRD1/ADRB3/AKAP12/CHRM2/CNR1/CXCL9/EDNRA/F  
LNA/GLP2R/GNAO1/GPR26/GRIK3/NPR3/NPY1R/P2RY12/PLN/PTGER3/PTGFR/S1PR3/VIP/ADGRG  
7 25

GO:0043583 BP ear development 25/1105 215/16241 0.006075601 0.052541113  
0.042099096  
C1QB/COL11A1/FGF10/FGFR1/FRZB/GABRA5/GLI2/GLI3/KCNK2/KCNK3/NKX3-2/PDGFRB/PR  
RX1/PVALB/ROR2/SIX2/SPARC/TGFB3/TIFAB/ADGRV1/ATOH1/GRHL3/NEUROD1/SALL1/USH1G  
25

GO:0002698 BP negative regulation of immune effector process 16/1105 118/16241  
0.006212274 0.053628627 0.042970478  
A2M/CCR2/CD22/CLEC4G/CR1/FCGR2B/FGL2/PTPRC/SERPING1/TGFB3/VSIG4/APOA1/APOA  
2/C4BPB/PGLYRP3/PGLYRP4 16

GO:0051924 BP regulation of calcium ion transport 27/1105 238/16241 0.006223492  
0.053631218 0.042972554

ADCYAP1R1/ANK2/ATP1A2/CAMK2A/CASQ1/CASQ2/CXCL12/CXCL9/FGF14/GNAO1/JPH2/JPH4/MYLK/P2RX2/P2RY12/PDGFRB/PLN/RGS4/SLC8A1/STAC/THY1/TLR9/ATP2C2/EPO/F2/P2RX3/SEMG1 27  
 GO:0071706 BP tumor necrosis factor superfamily cytokine production 19/1105  
 150/16241 0.006421903 0.05524411 0.0442649  
 ADIPOQ/AKAP12/AXL/BPI/C1QTNF4/CCL19/CCR2/CYBB/GPNMB/IGF1/IL12B/LILRA4/PTPRC/SYT11/THBS1/TLR9/IL17F/ORM1/ORM2 19  
 GO:0072511 BP divalent inorganic cation transport 46/1105 464/16241 0.006511108  
 0.05591357 0.044801311  
 ADCYAP1R1/ANK2/ANXA6/ATP1A2/ATP2B2/CACNA1G/CACNG7/CAMK2A/CASQ1/CASQ2/CCL19/CCL21/CCR7/CXCL12/CXCL9/FGF14/FGF2/GNAO1/GPM6A/HTR2A/JPH2/JPH4/MS4A1/MYLK/NALCN/NIPAL4/P2RX2/P2RY12/PDGFRB/PLN/PRKCB/PTPRC/RGS4/SLC8A1/STAC/THY1/TLR9/ABC2/ATP2C2/EPO/F2/HTR2C/P2RX3/SEMG1/SLC30A10/TRPM5 46  
 GO:0048562 BP embryonic organ morphogenesis 31/1105 285/16241 0.006563549  
 0.056043821 0.044905676  
 COL11A1/DSCAML1/EFEMP1/FBN1/FGF10/FGFR1/FRZB/GLI2/GLI3/HAND2/NKX3-2/PRRX1/RBPMS2/ROR2/SIX2/TGFB3/TIFAB/WNT9A/WNT9B/ATOH1/BMP7/FOLR1/FOXH1/GRHL3/HOXA11/IHH/NEUROD1/NOTO/SALL1/SIX3/USH1G 31  
 GO:0030279 BP negative regulation of ossification 11/1105 69/16241 0.006571914  
 0.056043821 0.044905676  
 DKK1/GDF10/GREM1/HAND2/IGFBP5/RANBP3L/RORB/SFRP1/TNN/TWIST2/FGF23 11  
 GO:0031670 BP cellular response to nutrient 11/1105 69/16241 0.006571914 0.056043821  
 0.044905676 COL1A1/CYBB/FOLR2/P2RY12/PENK/SFRP1/TNC/FGF23/FOLR1/FOXA2/P2RX3 11  
 GO:0042698 BP ovulation cycle 11/1105 69/16241 0.006571914 0.056043821  
 0.044905676  
 ADAMTS1/AXL/HAS1/NPY5R/PTPRN/RETN/SERPINF1/SLIT2/SLIT3/TGFB3/KISS1 11  
 GO:0099054 BP presynapse assembly 8/1105 42/16241 0.006638006 0.056264676  
 0.045082638 CBLN1/DKK1/LRFN5/LRRTM1/NLGN1/SLITRK2/SLITRK3/CEL 8  
 GO:0072073 BP kidney epithelium development 18/1105 140/16241 0.006738407  
 0.056264676 0.045082638  
 ADIPOQ/AGTR2/EPHA7/FGF2/FGFR1/GLI3/HEYL/IRX1/PECAM1/SFRP1/SIX2/SLIT2/WNT9B/WWTR1/BMP7/HOXA11/HOXD11/SALL1 18  
 GO:0002430 BP complement receptor mediated signaling pathway 4/1105 12/16241  
 0.006781085 0.056264676 0.045082638 CMKLR1/CR1/CR2/FPR3 4  
 GO:0010763 BP positive regulation of fibroblast migration 4/1105 12/16241 0.006781085  
 0.056264676 0.045082638 AKAP12/DDR2/SLC8A1/THBS1 4  
 GO:0010838 BP positive regulation of keratinocyte proliferation 4/1105 12/16241  
 0.006781085 0.056264676 0.045082638 FGF10/FGF7/REG3A/REG3G 4  
 GO:0014831 BP gastro-intestinal system smooth muscle contraction 4/1105 12/16241  
 0.006781085 0.056264676 0.045082638 PTGER3/SPX/SULF1/TACR2 4  
 GO:0030208 BP dermatan sulfate biosynthetic process 4/1105 12/16241 0.006781085  
 0.056264676 0.045082638 BGN/DCN/DSEL/VCAN 4  
 GO:0033605 BP positive regulation of catecholamine secretion 4/1105 12/16241

0.006781085 0.056264676 0.045082638 CARTPT/CXCL12/KCNB1/VIP 4  
 GO:0038166 BP angiotensin-activated signaling pathway 4/1105 12/162410.006781085  
 0.056264676 0.045082638 ACTN2/AGTR1/AGTR2/CAMK2A 4  
 GO:0043568 BP positive regulation of insulin-like growth factor receptor signaling pathway  
 4/1105 12/162410.006781085 0.056264676 0.045082638 AR/IGF1/IGFBP4/IGFBP54  
 GO:0051481 BP negative regulation of cytosolic calcium ion concentration 4/1105  
 12/162410.006781085 0.056264676 0.045082638 ATP1A2/KCNA5/KCNK3/SLC8A1 4  
 GO:0060019 BP radial glial cell differentiation 4/1105 12/162410.006781085 0.056264676  
 0.045082638 CDH2/FGF10/GLI3/EMX1 4  
 GO:0097104 BP postsynaptic membrane assembly 4/1105 12/162410.006781085  
 0.056264676 0.045082638 CDH2/NLGN1/NRXN2/CEL 4  
 GO:0099150 BP regulation of postsynaptic specialization assembly 4/1105 12/16241  
 0.006781085 0.056264676 0.045082638 CBLN1/GAP43/LRRTM1/PTPRS 4  
 GO:0150052 BP regulation of postsynapse assembly 4/1105 12/162410.006781085  
 0.056264676 0.045082638 CBLN1/GAP43/LRRTM1/PTPRS 4  
 GO:1903587 BP regulation of blood vessel endothelial cell proliferation involved in sprouting  
 angiogenesis 4/1105 12/162410.006781085 0.056264676 0.045082638  
 AGTR1/NGFR/THBS1/FGFBP14  
 GO:0015872 BP dopamine transport 9/1105 51/162410.006885512 0.056821769  
 0.045529015 CHRNA6/CNR1/CXCL12/HTR2A/KCNA2/SLC6A2/SYT11/SYT4/SYT6 9  
 GO:0050885 BP neuromuscular process controlling balance 9/1105 51/162410.006885512  
 0.056821769 0.045529015  
 ADCY5/GPR88/JPH4/NEFL/SHANK1/TIFAB/TNR/NKX6-2/USH1G 9  
 GO:0043534 BP blood vessel endothelial cell migration 15/1105 109/16241 0.006908189  
 0.056821769 0.045529015  
 AGTR2/AKT3/ANGPT4/APOE/FGF2/FGFR1/GREM1/MEOX2/SLIT2/THBS1/ADTRP/APOA1/FGF  
 BP1/HRG/NR2E1 15  
 GO:0030194 BP positive regulation of blood coagulation 6/1105 26/162410.006929202  
 0.056821769 0.045529015 SELP/SERPINE1/THBS1/APOH/F2/HRG 6  
 GO:1900048 BP positive regulation of hemostasis 6/1105 26/162410.006929202  
 0.056821769 0.045529015 SELP/SERPINE1/THBS1/APOH/F2/HRG 6  
 GO:1903792 BP negative regulation of anion transport 6/1105 26/162410.006929202  
 0.056821769 0.045529015 AGTR2/NPY5R/RGS4/SFRP4/THBS1/CYP4F2 6  
 GO:1990776 BP response to angiotensin 6/1105 26/162410.006929202 0.056821769  
 0.045529015 ACTN2/AGTR1/AGTR2/CAMK2A/CYBB/SLC30A10 6  
 GO:0007215 BP glutamate receptor signaling pathway 14/1105 99/162410.007007091  
 0.057073652 0.045730839  
 ACTN2/CACNG7/CCR2/FRRS1L/GRIA1/GRIK3/GRIK5/KCNB1/NEFL/NETO1/NLGN1/RELN/SHA  
 NK1/SHISA8 14  
 GO:0001937 BP negative regulation of endothelial cell proliferation 7/1105 34/16241  
 0.007029633 0.057073652 0.045730839 APOE/NGFR/SPARC/SULF1/THBS1/APOH/XDH  
 7  
 GO:0019228 BP neuronal action potential 7/1105 34/162410.007029633 0.057073652  
 0.045730839 CACNA1G/GPR88/KCNA1/KCNA2/SCN11A/SCN7A/P2RX3 7

GO:0031128 BP developmental induction 7/1105 34/162410.007029633 0.057073652  
0.045730839 AR/DKK1/FGF10/FGFR1/HOXA11/SALL1/SIX3 7

GO:0032965 BP regulation of collagen biosynthetic process 7/1105 34/162410.007029633  
0.057073652 0.045730839 EMILIN1/NPPC/PDGFRB/TGFB3/VIM/F2/IHH7

GO:0048566 BP embryonic digestive tract development 7/1105 34/162410.007029633  
0.057073652 0.045730839 FGF10/GLI2/GLI3/RBPMS2/SIX2/IHH/SALL1 7

GO:0001654 BP eye development 37/1105 358/16241 0.007291104 0.059053004  
0.047316815  
ABCB5/CHRD1/COL5A1/COL8A1/COL8A2/CRYAB/CYP1B1/EFEMP1/FBN1/FGF10/FOXP2/GLI  
3/GPM6A/KERA/MAB21L1/MAB21L2/NTRK2/PDGFRB/RORB/SALL2/SERPINF1/TENM3/THY1/TUB  
/UNC45B/VIM/WNT9A/WNT9B/ZEB2/BMP7/CRYBA2/GNGT1/GRHL3/IHH/NEUROD1/NR2E1/SIX3  
37

GO:0001936 BP regulation of endothelial cell proliferation 16/1105 120/16241  
0.00729747 0.059053004 0.047316815  
AGTR1/AKT3/APOE/CXCL12/FGF2/FGFR1/NGFR/NRP2/SPARC/SULF1/THBS1/THBS4/VIP/APO  
H/FGFBP1/XDH 16

GO:0051057 BP positive regulation of small GTPase mediated signal transduction 11/1105  
70/162410.00733066 0.059224019 0.047453842  
ADCYAP1R1/COL3A1/FGF10/GPR174/IGF1/NGF/P2RY10/PDGFRB/RELN/APOA1/EPO 11

GO:0007568 BP aging 32/1105 299/16241 0.007353632 0.059312052 0.047524379  
AKT3/C1QA/CNR1/COMP/CRYAB/DCN/DKK1/GNAO1/HTR2A/IGFBP5/ITGB2/KCNMB1/MPO/  
NPY5R/PDGFRB/PENK/PRELP/RETN/RNF165/SERPINE1/SERPINF1/SERPING1/TGFB3/TIMP2/VCA  
M1/DDC/EPO/MAGEA2/MAGEA2B/PCK1/SLC30A10/TERT 32

GO:0010770 BP positive regulation of cell morphogenesis involved in differentiation 19/1105  
152/16241 0.007389788 0.059505968 0.047679756  
CHODL/CXCL12/FLNA/FN1/LIMS2/MYOC/NEFL/NGF/NGFR/NTRK2/PLXNA4/RELN/SLIT2/ZEB  
2/APOA1/FGA/FGB/FGG/OLFM4 19

GO:0032609 BP interferon-gamma production 15/1105 110/16241 0.007510672  
0.059692699 0.047829376  
AXL/CCR2/CCR7/HLA-DPA1/HLA-DPB1/IL12B/IL21/KLRK4-KLRK1/TLR7/TLR8/TLR9/IL36RN/P  
GLYRP3/PGLYRP4/SCGB1A1 15

GO:0001710 BP mesodermal cell fate commitment 5/1105 19/162410.007522349  
0.059692699 0.047829376 DKK1/FGFR1/SFRP2/SIX2/HOXA11 5

GO:0003422 BP growth plate cartilage morphogenesis 5/1105 19/162410.007522349  
0.059692699 0.047829376 COL14A1/COL6A1/COL6A2/COL6A3/VIT 5

GO:0019373 BP epoxygenase P450 pathway 5/1105 19/162410.007522349 0.059692699  
0.047829376 CYP1B1/CYP2B6/CYP2C19/CYP2J2/CYP4F2 5

GO:0032891 BP negative regulation of organic acid transport 5/1105 19/162410.007522349  
0.059692699 0.047829376 AGTR2/NPY5R/RGS4/THBS1/CYP4F2 5

GO:0052695 BP cellular glucuronidation 5/1105 19/162410.007522349 0.059692699  
0.047829376 UGT1A1/UGT1A3/UGT1A7/UGT1A8/UGT1A9 5

GO:0055093 BP response to hyperoxia 5/1105 19/162410.007522349 0.059692699  
0.047829376 COL1A1/KCNA5/PDGFRB/EPO/NOX1 5

GO:1904994 BP regulation of leukocyte adhesion to vascular endothelial cell 5/1105

19/162410.007522349 0.059692699 0.047829376 CCL21/CCR2/CXCL12/ELANE/ITGB2  
5

GO:2000831 BP regulation of steroid hormone secretion 5/1105 19/162410.007522349  
0.059692699 0.047829376 AGTR1/AGTR2/RETN/TAC1/REN 5

GO:0050728 BP negative regulation of inflammatory response 17/1105 131/16241  
0.007586709 0.060106316 0.048160791  
ADCYAP1/ADIPOQ/APOE/ELANE/FCGR2B/IGF1/IL12B/KRT1/LRFN5/NPY5R/PTGIS/PTPRC/SER  
PINF1/SIGLEC10/APOA1/CXCL17/F2 17

GO:0010863 BP positive regulation of phospholipase C activity 8/1105 43/16241  
0.007680339 0.06065245 0.048598387  
ADCYAP1R1/EDNRA/FGF2/FGFR1/HTR2A/NTRK2/P2RY12/PDGFRB 8

GO:0046189 BP phenol-containing compound biosynthetic process 8/1105 43/16241  
0.007680339 0.06065245 0.048598387  
AGTR2/HAND2/MOXD1/ZEB2/DDC/PAH/PNMT/SLC45A2 8

GO:0001656 BP metanephros development 13/1105 90/162410.007695025 0.060670884  
0.048613157  
ADIPOQ/AGTR2/FBN1/FGF10/GLI3/IRX1/PDGFRB/SIX2/WNT9B/WWTR1/BMP7/HOXA11/SA  
LL1 13

GO:0032680 BP regulation of tumor necrosis factor production 18/1105 142/16241  
0.007788911 0.061312709 0.049127426  
ADIPOQ/AKAP12/AXL/BPI/C1QTNF4/CCL19/CCR2/CYBB/GPNMB/IGF1/IL12B/LILRA4/PTPRC/  
SYT11/THBS1/TLR9/ORM1/ORM2 18

GO:0009620 BP response to fungus 9/1105 52/162410.007836618 0.061589546  
0.049349244 CLEC6A/CTSG/ELANE/MPO/C10orf99/DEFA1/HRG/IL17A/IL36RN 9

GO:0031667 BP response to nutrient levels 47/1105 482/16241 0.008077125  
0.063378337 0.050782531  
ADCYAP1/ADIPOQ/APOE/BCHE/CARTPT/CNR1/COL1A1/CYBB/FOLR2/FSTL1/KCNB1/MAP1LC  
3C/MPO/NPY/P2RX2/P2RY12/PENK/SFRP1/SFRP2/SLC8A1/SPARC/SPX/TNC/VCAM1/WNT9B/APO  
A1/BMP7/CLPS/CLPSL1/CLPSL2/DAPL1/EPO/FGF23/FOLR1/FOXA2/G6PC/GAST/HTR2C/KRT20/LC  
N2/NPFF/OTC/P2RX3/PCK1/PCSK9/REG1A/UGT1A1 47

GO:0030500 BP regulation of bone mineralization 11/1105 71/162410.008155979  
0.063793261 0.051114993  
COMP/DDR2/GREM1/MGP/OMD/SLC8A1/TGFB3/TMEM119/ADGRV1/BMP7/FGF23 11

GO:0035019 BP somatic stem cell population maintenance 11/1105 71/162410.008155979  
0.063793261 0.051114993  
FGF10/FGF2/FOXD3/SFRP1/SIX2/WNT9B/ASCL2/BMP7/CDX2/NR2E1/SALL1 11

GO:0042063 BP gliogenesis 30/1105 278/16241 0.008258452 0.064417821  
0.051615428  
ADCYAP1/C1QA/CCR2/CDH2/CSF1R/EGR2/FGF10/FGF5/GAP43/GLI3/LAMA2/MAG/MYOC/N  
DN/NTRK2/P2RY12/PENK/PLP1/PRDM8/RELN/ROR2/SOX10/TENM4/VIM/ASCL2/EMX1/F2/NKX6-  
2/NR2E1/TERT30

GO:0021955 BP central nervous system neuron axonogenesis 7/1105 35/16241  
0.008282461 0.064417821 0.051615428 CDH11/DCLK1/GLI2/PLXNA4/SLIT2/ZEB2/NR2E1  
7

GO:1902742 BP apoptotic process involved in development 7/1105 35/162410.008282461  
0.064417821 0.051615428 CRYAB/HAND2/SLIT2/SLIT3/XKR4/BMP7/SIX3 7

GO:0031346 BP positive regulation of cell projection organization 37/1105 361/16241  
0.008296446 0.064417821 0.051615428  
ADCYAP1/ALK/APOE/CACNG7/CCL19/CCL21/CCR7/CHODL/CNR1/CNTN1/CXCL12/DPYSL3/EP  
HA3/FGFR1/FN1/GPM6A/NAV3/NEFL/NGF/NGFR/NLGN1/NTRK2/P2RY12/PLXNA4/RELN/SERPINF  
1/SHANK1/SLIT2/STMN2/SYT4/TENM3/TGFB3/ZEB2/BMP7/EPO/LCN2/REG1A 37

GO:0007631 BP feeding behavior 14/1105 101/16241 0.008344187 0.064417821  
0.051615428  
CARTPT/CCKAR/CNR1/EN1/HAND2/HCRT1R/NPY/NPY1R/NPY5R/NTRK2/RETN/UCHL1/HTR2  
C/REN 14

GO:0050886 BP endocrine process 12/1105 81/162410.008388027 0.064417821  
0.051615428  
AGTR1/AGTR2/CMA1/CTSG/FGFR1/RETN/SUCNR1/TAC1/TACR2/KISS1/NOX1/REN 12

GO:0097756 BP negative regulation of blood vessel diameter 12/1105 81/16241  
0.008388027 0.064417821 0.051615428  
ACTA2/AGTR1/ATP1A2/COMP/EDNRA/HTR2A/HTR7/KCNA5/SLC8A1/FGA/FGB/FGG 12

GO:0035767 BP endothelial cell chemotaxis 6/1105 27/162410.008406316 0.064417821  
0.051615428 CXCL13/FGF2/FGFR1/SMOC2/THBS1/HRG 6

GO:0045940 BP positive regulation of steroid metabolic process 6/1105 27/16241  
0.008406316 0.064417821 0.051615428 AGTR1/APOE/APOA1/APOA2/APOA4/APOA5  
6

GO:0050820 BP positive regulation of coagulation 6/1105 27/162410.008406316  
0.064417821 0.051615428 SELP/SERPINE1/THBS1/APOH/F2/HRG 6

GO:0051953 BP negative regulation of amine transport 6/1105 27/162410.008406316  
0.064417821 0.051615428 AGTR2/CNR1/NPY5R/P2RY12/RGS4/SYT4 6

GO:0060384 BP innervation 6/1105 27/162410.008406316 0.064417821 0.051615428  
COL25A1/GABRA5/NPTX1/RNF165/SULF1/VCAM1 6

GO:2000463 BP positive regulation of excitatory postsynaptic potential 6/1105  
27/162410.008406316 0.064417821 0.051615428  
IGSF11/NETO1/NLGN1/RELN/RGS4/SHANK1 6

GO:0010976 BP positive regulation of neuron projection development 29/1105 267/16241  
0.008529091 0.065256843 0.052287703  
ADCYAP1/ALK/APOE/CACNG7/CHODL/CNR1/CNTN1/CXCL12/DPYSL3/EPHA3/FGFR1/FN1/NE  
FL/NGF/NGFR/NLGN1/NTRK2/PLXNA4/RELN/SERPINF1/SHANK1/SLIT2/STMN2/SYT4/TENM3/ZEB  
2/BMP7/EPO/REG1A 29

GO:0070838 BP divalent metal ion transport 45/1105 459/16241 0.008571841  
0.065481935 0.05246806  
ADCYAP1R1/ANK2/ANXA6/ATP1A2/ATP2B2/CACNA1G/CACNG7/CAMK2A/CASQ1/CASQ2/CC  
L19/CCL21/CCR7/CXCL12/CXCL9/FGF14/FGF2/GNAO1/GPM6A/HTR2A/JPH2/JPH4/MS4A1/MYLK/  
NALCN/NIPAL4/P2RX2/P2RY12/PDGFRB/PLN/PRKCB/PTPRC/RGS4/SLC8A1/STAC/THY1/TLR9/ATP2  
C2/EPO/F2/HTR2C/P2RX3/SEMG1/SLC30A10/TRPM5 45

GO:0010463 BP mesenchymal cell proliferation 8/1105 44/162410.00884103  
0.067225921 0.053865446 FGF7/FGFR1/FOXP2/HAND2/PRRX1/SIX2/BMP7/IHH 8

GO:0044060 BP regulation of endocrine process 8/1105 44/162410.00884103  
 0.067225921 0.053865446 AGTR1/AGTR2/FGFR1/RETN/TAC1/TACR2/KISS1/REN 8  
 GO:0090101 BP negative regulation of transmembrane receptor protein serine/threonine  
 kinase signaling pathway 15/1105 112/16241 0.008841194 0.067225921 0.053865446  
 ASPN/CHRD1/CILP/DKK1/EMILIN1/FBN1/GREM1/GREM2/HTRA3/LTBP1/RBPMS2/SFRP1/SF  
 RP2/TGFB11/TGFB3 15  
 GO:0002042 BP cell migration involved in sprouting angiogenesis 9/1105 53/16241  
 0.008884555 0.067347119 0.053962557  
 AKT3/FGF2/GREM1/MEOX2/SLIT2/THBS1/ADTRP/FGFBP1/NR2E1 9  
 GO:0043113 BP receptor clustering 9/1105 53/162410.008884555 0.067347119  
 0.053962557 APOE/CDH2/FLNA/GRIK5/ITGB2/NLGN1/NRXN2/RELN/THY1 9  
 GO:0048839 BP inner ear development 22/1105 188/16241 0.008979696 0.067963431  
 0.054456384  
 C1QB/COL11A1/FGF10/FGFR1/FRZB/GABRA5/GLI2/GLI3/KCNK2/KCNK3/PDGFRB/PRRX1/PV  
 ALB/ROR2/SPARC/TGFB3/TIFAB/ADGRV1/ATOH1/GRHL3/NEUROD1/USH1G 22  
 GO:0099601 BP regulation of neurotransmitter receptor activity 11/1105 72/16241  
 0.009051604 0.068362211 0.05477591  
 ACTN2/CACNG7/CCR2/GRIA1/NEFL/NETO1/NLGN1/NPTX1/RELN/SHANK1/SHISA8 11  
 GO:0031214 BP biomineral tissue development 19/1105 155/16241 0.00906022  
 0.068362211 0.05477591  
 ASPN/COL1A1/COL1A2/COMP/DDR2/GPNMB/GREM1/IGF1/MGP/OMD/ROR2/RSP02/SLC8  
 A1/TGFB3/TMEM119/ADGRV1/BMP7/CEMP1/FGF23 19  
 GO:0001823 BP mesonephros development 14/1105 102/16241 0.009084402  
 0.068439545 0.054837875  
 AGTR2/FGF10/FGF2/FGFR1/GLI3/SFRP1/SIX2/SLIT2/WNT9B/BMP7/HOXA11/HOXD11/REN/S  
 ALL114  
 GO:0097006 BP regulation of plasma lipoprotein particle levels 12/1105 82/16241  
 0.009235363 0.068708343 0.055053252  
 ADIPOQ/AGTR1/APOE/GPIHBP1/MPO/APOA1/APOA2/APOA4/APOA5/APOC3/MTP/PCSK9  
 12  
 GO:0001867 BP complement activation, lectin pathway 4/1105 13/162410.009273948  
 0.068708343 0.055053252 A2M/FCN1/KRT1/SERPING1 4  
 GO:0007171 BP activation of transmembrane receptor protein tyrosine kinase activity  
 4/1105 13/162410.009273948 0.068708343 0.055053252  
 ANGPT4/CHRNA3/GREM1/NRG3 4  
 GO:0030205 BP dermatan sulfate metabolic process 4/1105 13/162410.009273948  
 0.068708343 0.055053252 BGN/DCN/DSEL/VCAN 4  
 GO:0032488 BP Cdc42 protein signal transduction 4/1105 13/162410.009273948  
 0.068708343 0.055053252 APOE/APOA1/APOC3/RHOV 4  
 GO:0033623 BP regulation of integrin activation 4/1105 13/162410.009273948  
 0.068708343 0.055053252 CXCL13/P2RY12/SELP/CDH17 4  
 GO:0034374 BP low-density lipoprotein particle remodeling 4/1105 13/162410.009273948  
 0.068708343 0.055053252 AGTR1/APOE/MPO/APOA2 4  
 GO:0034384 BP high-density lipoprotein particle clearance 4/1105 13/162410.009273948

0.068708343 0.055053252 APOE/APOA1/APOA2/APOC3 4  
 GO:0038065 BP collagen-activated signaling pathway 4/1105 13/162410.009273948  
 0.068708343 0.055053252 COL1A1/COL4A3/DDR2/ITGA11 4  
 GO:0050966 BP detection of mechanical stimulus involved in sensory perception of pain  
 4/1105 13/162410.009273948 0.068708343 0.055053252  
 CXCL12/HTR2A/KCNA1/PHF24 4  
 GO:0061430 BP bone trabecula morphogenesis 4/1105 13/162410.009273948  
 0.068708343 0.055053252 COL1A1/GREM1/MMP2/SFRP1 4  
 GO:0050678 BP regulation of epithelial cell proliferation 33/1105 316/16241  
 0.009359767 0.069239724 0.055479026  
 AGTR1/AKT3/APOE/AR/CXCL12/CYP7B1/FGF10/FGF2/FGF7/FGFR1/FOXP2/GDF5/IGF1/LIMS  
 2/NGFR/NRP2/PTPRN/SERPINF1/SFRP1/SFRP2/SPARC/SULF1/THBS1/THBS4/VIP/APOH/FGFBP1/I  
 HH/KRT4/REG1A/REG3A/REG3G/XDH 33  
 GO:0007620 BP copulation 5/1105 20/162410.009477769 0.069484781 0.055675381  
 CNR1/TAC1/VIP/PI3/SEMG1 5  
 GO:0010881 BP regulation of cardiac muscle contraction by regulation of the release of  
 sequestered calcium ion 5/1105 20/162410.009477769 0.069484781 0.055675381  
 ANK2/ATP1A2/CASQ2/PLN/SLC8A1 5  
 GO:0022010 BP central nervous system myelination 5/1105 20/162410.009477769  
 0.069484781 0.055675381 MAG/PLP1/SOX10/TENM4/NKX6-2 5  
 GO:0032291 BP axon ensheathment in central nervous system 5/1105 20/16241  
 0.009477769 0.069484781 0.055675381 MAG/PLP1/SOX10/TENM4/NKX6-2 5  
 GO:0044342 BP type B pancreatic cell proliferation 5/1105 20/162410.009477769  
 0.069484781 0.055675381 IGFBP4/IGFBP5/PTPRN/SFRP1/REG1A 5  
 GO:0051004 BP regulation of lipoprotein lipase activity 5/1105 20/162410.009477769  
 0.069484781 0.055675381 GPIHBP1/APOA4/APOA5/APOC3/APOH 5  
 GO:0032640 BP tumor necrosis factor production 18/1105 145/16241 0.00960846  
 0.070233269 0.056275114  
 ADIPOQ/AKAP12/AXL/BPI/C1QTNF4/CCL19/CCR2/CYBB/GPNMB/IGF1/IL12B/LILRA4/PTPRC/  
 SYT11/THBS1/TLR9/ORM1/ORM2 18  
 GO:1903555 BP regulation of tumor necrosis factor superfamily cytokine production 18/1105  
 145/16241 0.00960846 0.070233269 0.056275114  
 ADIPOQ/AKAP12/AXL/BPI/C1QTNF4/CCL19/CCR2/CYBB/GPNMB/IGF1/IL12B/LILRA4/PTPRC/  
 SYT11/THBS1/TLR9/ORM1/ORM2 18  
 GO:0010469 BP regulation of signaling receptor activity 20/1105 167/16241 0.009683574  
 0.070634056 0.056596249  
 ACTN2/AGTR2/CACNG7/CCR2/DKK1/FCGR2B/GREM1/GREM2/GRIA1/NEFL/NETO1/NLGN1/  
 NPTX1/RELN/SERPINE1/SHANK1/SHISA8/ADH7/MUC4/PCSK9 20  
 GO:0086010 BP membrane depolarization during action potential 7/1105 36/16241  
 0.009692051 0.070634056 0.056596249  
 ANK2/ATP1A2/CACNA1G/SCN11A/SCN2B/SCN7A/SLC8A1 7  
 GO:0007584 BP response to nutrient 24/1105 212/16241 0.00975502 0.07098764  
 0.056879561  
 ADIPOQ/BCHE/CNR1/COL1A1/CYBB/FOLR2/P2RX2/P2RY12/PENK/SFRP1/SFRP2/SLC8A1/SP

ARC/TNC/VCAM1/APOA1/BMP7/EPO/FGF23/FOLR1/FOXA2/OTC/P2RX3/UGT1A1 24  
 GO:0034103 BP regulation of tissue remodeling 11/1105 73/162410.010021312  
 0.072074961 0.057750788  
 CARTPT/CSF1R/GPNMB/GREM1/HAND2/IL12B/IL21/SFRP1/THBS4/TMEM119/HRG 11  
 GO:0086065 BP cell communication involved in cardiac conduction 9/1105 54/16241  
 0.010035228 0.072074961 0.057750788  
 ANK2/ATP1A2/CACNA1G/CASQ2/CTNNA3/FLNA/KCNA5/KCNJ5/SLC8A1 9  
 GO:0006929 BP substrate-dependent cell migration 6/1105 28/162410.010096263  
 0.072074961 0.057750788 FN1/ITGA11/NRP2/P2RY12/PTPRC/SLIT2 6  
 GO:0008045 BP motor neuron axon guidance 6/1105 28/162410.010096263 0.072074961  
 0.057750788 EGR2/NTN3/NTNG1/PLXNA4/RNF165/SLIT2 6  
 GO:0010880 BP regulation of release of sequestered calcium ion into cytosol by sarcoplasmic  
 reticulum 6/1105 28/162410.010096263 0.072074961 0.057750788  
 ANK2/ATP1A2/CASQ1/CASQ2/PLN/SLC8A1 6  
 GO:0018146 BP keratan sulfate biosynthetic process 6/1105 28/162410.010096263  
 0.072074961 0.057750788 KERA/LUM/OGN/OMD/PRELP/CHST5 6  
 GO:0051491 BP positive regulation of filopodium assembly 6/1105 28/162410.010096263  
 0.072074961 0.057750788 CCL21/CCR7/DPYSL3/GPM6A/NLGN1/TGFB3 6  
 GO:0090022 BP regulation of neutrophil chemotaxis 6/1105 28/162410.010096263  
 0.072074961 0.057750788 CCL19/CCL21/CCR7/JAM3/SLIT2/THBS4 6  
 GO:0002437 BP inflammatory response to antigenic stimulus 8/1105 45/16241  
 0.010127827 0.072074961 0.057750788  
 ADCYAP1/CCR7/CNR1/ELANE/FCGR2B/IL12B/NPY5R/NPFF 8  
 GO:0032371 BP regulation of sterol transport 8/1105 45/162410.010127827 0.072074961  
 0.057750788 ADIPOQ/APOE/APOA1/APOA2/APOA4/APOA5/APOC3/PCSK9 8  
 GO:0032374 BP regulation of cholesterol transport 8/1105 45/162410.010127827  
 0.072074961 0.057750788 ADIPOQ/APOE/APOA1/APOA2/APOA4/APOA5/APOC3/PCSK9  
 8  
 GO:0035987 BP endodermal cell differentiation 8/1105 45/162410.010127827  
 0.072074961 0.057750788 COL11A1/COL5A1/COL6A1/COL8A1/DKK1/FN1/ITGB2/MMP2  
 8  
 GO:0060986 BP endocrine hormone secretion 8/1105 45/162410.010127827  
 0.072074961 0.057750788 AGTR1/AGTR2/FGFR1/RETN/TAC1/TACR2/KISS1/REN 8  
 GO:0099172 BP presynapse organization 8/1105 45/162410.010127827 0.072074961  
 0.057750788 CBLN1/DKK1/LRFN5/LRRTM1/NLGN1/SLITRK2/SLITRK3/CEL 8  
 GO:1900274 BP regulation of phospholipase C activity 8/1105 45/162410.010127827  
 0.072074961 0.057750788  
 ADCYAP1R1/EDNRA/FGF2/FGFR1/HTR2A/NTRK2/P2RY12/PDGFRB 8  
 GO:0048661 BP positive regulation of smooth muscle cell proliferation 12/1105 83/16241  
 0.010147782 0.072074961 0.057750788  
 ADAMTS1/ELANE/FGF2/IGF1/IGFBP5/MMP2/NPY5R/PDGFRB/RBPMS2/THBS1/NOX1/TERT  
 12  
 GO:0001935 BP endothelial cell proliferation 17/1105 135/16241 0.010153883  
 0.072074961 0.057750788

AGTR1/AKT3/APOE/CXCL12/FGF2/FGFR1/NGFR/NRP2/SPARC/SULF1/THBS1/THBS4/VIP/APO  
 A1/APOH/FGFBP1/XDH 17  
 GO:0042035 BP regulation of cytokine biosynthetic process 14/1105 104/16241  
 0.010719436 0.075979607 0.060879426  
 AKAP12/CCR2/CYBB/ELANE/IL12B/IL21/PTPRC/THBS1/TLR7/TLR8/TLR9/APOA2/IGF2BP1/IL1  
 7F 14  
 GO:0010660 BP regulation of muscle cell apoptotic process 10/1105 64/162410.01073751  
 0.075998053 0.060894205  
 ADCYAP1/CAMK2A/HAND2/HSPB6/IGF1/IL12B/MYOCD/SFRP2/APOH/BMP7 10  
 GO:0010975 BP regulation of neuron projection development 46/1105 478/16241  
 0.010919022 0.077171563 0.061834492  
 ADCYAP1/ADGRB3/ALK/APOE/CACNG7/CDH2/CHODL/CHRNA3/CNR1/CNTN1/CXCL12/DKK1  
 /DPYSL3/EPHA3/EPHA7/FGFR1/FN1/LRRC4C/MAG/NEFL/NGF/NGFR/NLGN1/NTRK2/PLXNA4/PRR  
 X1/PTPRS/RELN/RGMA/SERPINF1/SFRP1/SFRP2/SHANK1/SLIT2/SPOCK1/STMN2/SYT4/TENM3/T  
 HY1/TNR/VIM/ZEB2/BMP7/EPO/NR2E1/REG1A 46  
 GO:0015908 BP fatty acid transport 13/1105 94/162410.010992673 0.07746917  
 0.062072953  
 AGTR2/APOE/FABP4/PLA2G2D/SPX/THBS1/ABCC2/CYP4F2/FABP1/LCN12/PLA2G12B/PLA2G  
 2F/PLA2G4F 13  
 GO:0060993 BP kidney morphogenesis 13/1105 94/162410.010992673 0.07746917  
 0.062072953  
 AGTR2/FGF10/FGF2/GLI3/IRX1/PDGFRB/SIX2/WNT9B/WWTR1/BMP7/HOXA11/HOXD11/SA  
 LL1 13  
 GO:0051899 BP membrane depolarization 12/1105 84/162410.01112845 0.078313676  
 0.062749622  
 ANK2/ATP1A2/CACNA1G/CHRNA6/DCN/FHL1/MYOC/SCN11A/SCN2B/SCN7A/SLC8A1/NPFF  
 12  
 GO:0010761 BP fibroblast migration 7/1105 37/162410.011268947 0.07907581  
 0.063360289 AKAP12/DDR2/FGF2/HAS1/SLC8A1/THBS1/TNS1 7  
 GO:0086091 BP regulation of heart rate by cardiac conduction 7/1105 37/16241  
 0.011268947 0.07907581 0.063360289  
 ANK2/CACNA1G/CTNNA3/KCNA5/KCNE4/KCNJ5/SCN2B 7  
 GO:0022029 BP telencephalon cell migration 9/1105 55/162410.011294559 0.079142472  
 0.063413703 CXCL12/GLI3/NRG3/NRP2/P2RY12/RELN/SLIT2/TNR/NR2E1 9  
 GO:0052548 BP regulation of endopeptidase activity 39/1105 393/16241 0.01139827  
 0.079755414 0.063904829  
 A2M/COL4A3/COL6A3/CR1/CRYAB/CST2/CST5/EPHA7/HMSD/ITIH5/NGF/NGFR/PZP/SERPIN  
 A3/SERPINE1/SERPINF1/SERPING1/SFRP2/SPOCK1/SPOCK3/THBS1/TIMP2/TIMP3/WNT9A/AMBP  
 /CARD18/CSTL1/FABP1/HRG/KHDC1L/MAGEA3/PI3/SEMG1/SERPINA10/SERPINB13/SPINK4/WFD  
 C10A/WFDC12/XDH 39  
 GO:0022602 BP ovulation cycle process 8/1105 46/162410.011548451 0.080576695  
 0.064562888 ADAMTS1/NPY5R/PTPRN/RETN/SLIT2/SLIT3/TGFB3/KISS1 8  
 GO:0050919 BP negative chemotaxis 8/1105 46/162410.011548451 0.080576695  
 0.064562888 EPHA7/FLRT2/NRG3/NRP2/PLXNA4/SLIT2/SLIT3/APOA1 8

GO:0030203 BP glycosaminoglycan metabolic process 19/1105 159/16241 0.011745798  
0.081333657 0.065169412  
BGN/DCN/DSEL/EXTL1/FGF2/HAS1/ITIH5/KERA/LUM/OGN/OMD/PDGFRB/PRELP/SDC3/SPO  
CK3/VCAN/CHST5/PGLYRP3/PGLYRP4 19

GO:0014821 BP phasic smooth muscle contraction 5/1105 21/16241 0.01175629  
0.081333657 0.065169412 P2RX2/PTGER3/TACR2/TIFAB/P2RX3 5

GO:0033688 BP regulation of osteoblast proliferation 5/1105 21/16241 0.01175629  
0.081333657 0.065169412 GREM1/NPR3/SFRP1/TMEM119/TNN 5

GO:0035929 BP steroid hormone secretion 5/1105 21/16241 0.01175629 0.081333657  
0.065169412 AGTR1/AGTR2/RETN/TAC1/REN 5

GO:0045663 BP positive regulation of myoblast differentiation 5/1105 21/16241  
0.01175629 0.081333657 0.065169412 BOC/CXCL9/RANBP3L/RBM24/SMYD1 5

GO:0051000 BP positive regulation of nitric-oxide synthase activity 5/1105 21/16241  
0.01175629 0.081333657 0.065169412 AGTR2/APOE/FCER2/NPR3/TERT 5

GO:0051705 BP multi-organism behavior 10/1105 65/16241 0.011938874 0.082364818  
0.06599564 EN1/GRP/GRPR/HAND2/KIRREL3/NRXN2/NRXN3/PENK/SHANK1/NR2E1 10

GO:2001259 BP positive regulation of cation channel activity 10/1105 65/16241 0.011938874  
0.082364818 0.06599564  
ACTN2/ANK2/CASQ1/CCR2/FGF14/JPH2/KCNA1/LRRC38/RELN/STAC 10

GO:0048259 BP regulation of receptor-mediated endocytosis 13/1105 95/16241  
0.011967253 0.082444806 0.066059731  
CCL19/CCL21/DKK1/GREM1/LRRTM1/RSPO1/SERPINE1/SFRP4/SNAP91/SYT11/APOA5/APOC  
3/PCSK9 13

GO:0002675 BP positive regulation of acute inflammatory response 6/1105 29/16241  
0.012014133 0.082536256 0.066133006 CCR7/CNR1/NPY5R/PTGER3/TAC1/CREB3L3 6

GO:0007271 BP synaptic transmission, cholinergic 6/1105 29/16241 0.012014133  
0.082536256 0.066133006 APOE/CHRNA3/CHRNA6/LAMA2/TAC1/TACR2 6

GO:0010038 BP response to metal ion 36/1105 358/16241 0.012092277 0.082957077  
0.066470193  
C1QA/CACNA1G/CASQ2/CNGA3/CYBB/CYBRD1/FABP4/KCNA1/KCNK3/KCNMA1/KCNMB1/N  
LGN1/PENK/PLN/SERPINF1/SOD3/SPARC/SUCNR1/SYT11/SYT4/SYT6/THBS1/VCAM1/ABCC2/ADG  
RV1/APOBEC1/CHP2/FGA/FGB/FGF23/FGG/OTC/SLC30A10/TERT/TFR2/ZACN 36

GO:0000302 BP response to reactive oxygen species 24/1105 216/16241 0.012123094  
0.083052492 0.066546646  
APOE/AXL/CCL19/CCR7/COL1A1/CRYAB/CYP1B1/FBLN5/GNAO1/KCNA5/MMP2/MPO/NME8  
/PDGFRB/PTPRN/SLC8A1/SOD3/APOA4/BMP7/FABP1/LCN2/MMP3/S100A7/SCGB1A1 24

GO:0046427 BP positive regulation of JAK-STAT cascade 12/1105 85/16241 0.012180552  
0.083299394 0.066744479  
CSF1R/CYP1B1/FLT3/GHR/IGF1/IL10RA/IL12B/IL21/IL31RA/PECAM1/EPO/F2 12

GO:0070664 BP negative regulation of leukocyte proliferation 11/1105 75/16241  
0.012198234 0.083299394 0.066744479  
CLEC4G/FCGR2B/GPNMB/GREM1/LRRC32/PLA2G2D/TNFRSF13B/VSIG4/IHH/PLA2G2F/SCGB  
1A1 11

GO:0035112 BP genitalia morphogenesis 4/1105 14/16241 0.012294801 0.083299394

0.066744479 AR/FGF10/ROR2/TIFAB 4  
 GO:0048266 BP behavioral response to pain 4/1105 14/162410.012294801 0.083299394  
 0.066744479 P2RX2/THBS1/THBS4/P2RX3 4  
 GO:0051852 BP disruption by host of symbiont cells 4/1105 14/162410.012294801  
 0.083299394 0.066744479 CTSB/ELANE/DEFA1/F2 4  
 GO:0060253 BP negative regulation of glial cell proliferation 4/1105 14/162410.012294801  
 0.083299394 0.066744479 ADCYAP1/SOX10/ASCL2/TERT4  
 GO:0072498 BP embryonic skeletal joint development 4/1105 14/162410.012294801  
 0.083299394 0.066744479 WNT9A/BMP7/HOXA11/IHH 4  
 GO:0090136 BP epithelial cell-cell adhesion 4/1105 14/162410.012294801 0.083299394  
 0.066744479 BVES/CYP1B1/THBS4/IHH 4  
 GO:0045807 BP positive regulation of endocytosis 18/1105 149/16241 0.012546328  
 0.084886453 0.068016125  
 APOE/AXL/CCL19/CCL21/CLIP3/FCGR2B/GREM1/NLGN1/PTPRC/RAB31/SERPINE1/SFRP4/TU  
 B/APOA1/APOA2/APOA5/PCSK9/TFR2 18  
 GO:0055081 BP anion homeostasis 9/1105 56/162410.012668456 0.085381003  
 0.068412388 APOE/SFRP4/SLC12A3/ABCC2/APOA1/FGF23/MLXIPL/OTC/SLC34A3 9  
 GO:0060688 BP regulation of morphogenesis of a branching structure 9/1105 56/16241  
 0.012668456 0.085381003 0.068412388  
 AGTR2/AR/FGF10/FGF7/FGFR1/SFRP1/SIX2/SULF1/BMP7 9  
 GO:0001819 BP positive regulation of cytokine production 43/1105 445/16241  
 0.01267157 0.085381003 0.068412388  
 ADCYAP1/ADIPOQ/AGTR2/AKAP12/C1QTNF4/CCL19/CCR2/CCR7/CLEC6A/CLEC9A/CRTAM/C  
 SF1R/CYBB/CYP1B1/ELANE/FCN1/HEG1/HLA-DPA1/HLA-DPB1/IL12B/IL21/KLRCA-KLRK1/LUM/LU  
 RAP1/PTPRC/SERPINE1/SULF1/THBS1/TLR7/TLR8/TLR9/APOA2/CEACAM20/CXCL17/HHLA2/IL17  
 A/IL17F/IL36G/IL36RN/IL37/NOX1/ORM1/ORM2 43  
 GO:0043010 BP camera-type eye development 32/1105 311/16241 0.012711886  
 0.085435534 0.068456082  
 COL8A1/COL8A2/CRYAB/CYP1B1/EFEMP1/FBN1/FGF10/FOXP2/GLI3/GPM6A/KERA/MAB21L  
 1/MAB21L2/NTRK2/PDGFRB/RORB/SERPINF1/TENM3/THY1/TUB/UNC45B/VIM/WNT9A/WNT9B  
 /ZEB2/BMP7/CRYBA2/GRHL3/IHH/NEUROD1/NR2E1/SIX3 32  
 GO:0016042 BP lipid catabolic process 33/1105 323/16241 0.012714449 0.085435534  
 0.068456082  
 ADIPOQ/APOE/CNR1/CYP1B1/FABP4/LGALS12/PLA2G2D/PLCXD3/PLD4/ADTRP/AKR1B10/AP  
 OA1/APOA2/APOA4/APOA5/APOC3/ASPG/CEL/CLPS/CLPSL1/CLPSL2/CYP3A4/CYP4F2/FABP1/FAB  
 P2/FABP6/FGF23/PCK1/PLA2G12B/PLA2G2F/PLA2G4E/PLA2G4F/SULT2A1 33  
 GO:0050679 BP positive regulation of epithelial cell proliferation 21/1105 183/16241  
 0.012960538 0.086970169 0.069685724  
 AGTR1/AKT3/AR/CXCL12/CYP7B1/FGF10/FGF2/FGF7/FGFR1/FOXP2/IGF1/NRP2/PTPRN/SFR  
 P1/THBS4/VIP/FGFBP1/IHH/REG1A/REG3A/REG3G 21  
 GO:0070482 BP response to oxygen levels 37/1105 372/16241 0.013018105  
 0.08723729 0.069899758  
 ADIPOQ/ANGPT4/COL1A1/CPEB1/CRYAB/CXCL12/CYBB/EDNRA/FMN2/KCNA5/KCNK2/KCNK  
 3/KCNMA1/KCNMB1/MMP2/MYOC/NPPC/P2RX2/PDGFRB/PENK/PTGIS/SFRP1/SLC8A1/SOD3/T

GFB3/THBS1/VCAM1/ASCL2/BMP7/EPO/FABP1/GNGT1/NOX1/P2RX3/PCK1/REG1A/TERT 37  
 GO:0061383 BP trabecula morphogenesis 8/1105 47/162410.013110559 0.087737148  
 0.070300274 ADAMTS1/COL1A1/GREM1/HEG1/MMP2/SFRP1/BMP7/FOXH1 8  
 GO:0050710 BP negative regulation of cytokine secretion 10/1105 66/162410.013238921  
 0.088355411 0.070795663  
 FCGR2B/FN1/LRRC32/SSC5D/SYT11/TLR8/APOA1/APOA2/CARD18/IL36RN 10  
 GO:0050918 BP positive chemotaxis 10/1105 66/162410.013238921 0.088355411  
 0.070795663 CCR4/CXCL12/FGF10/FGF2/FGF7/GPNMB/CCL15/DEFB4A/SAA2/SAA4 10  
 GO:0048754 BP branching morphogenesis of an epithelial tube 18/1105 150/16241  
 0.013381477 0.089185639 0.071460892  
 AGTR2/AR/EDNRA/FGF10/FGF2/GLI2/GLI3/RSP02/SFRP2/SIX2/SLIT2/TNC/WNT9B/BMP7/H  
 OXA11/HOXD11/IHH/SALL1 18  
 GO:0003151 BP outflow tract morphogenesis 11/1105 76/162410.013413115 0.089275369  
 0.071532789 ELN/HAND2/HEY1/NPY1R/NPY5R/NRP2/SFRP2/ZFPM2/BMP7/FOLR1/FOXH1  
 11  
 GO:0010762 BP regulation of fibroblast migration 6/1105 30/162410.014174463  
 0.093960816 0.07528705 AKAP12/DDR2/FGF2/HAS1/SLC8A1/THBS1 6  
 GO:0086019 BP cell-cell signaling involved in cardiac conduction 6/1105 30/16241  
 0.014174463 0.093960816 0.07528705 ANK2/CACNA1G/CASQ2/FLNA/KCNA5/KCNJ5  
 6  
 GO:2000406 BP positive regulation of T cell migration 6/1105 30/162410.014174463  
 0.093960816 0.07528705 CCL21/CCR2/CXCL12/CXCL13/CCL20/S100A7 6  
 GO:0071774 BP response to fibroblast growth factor 17/1105 140/16241 0.014283869  
 0.094179747 0.075462471  
 COL1A1/CXCL13/FGF10/FGF2/FGF5/FGF7/FGFR1/FLRT2/SFRP1/SMOC2/SULF1/THBS1/TNC/  
 FGF23/FGFBP1/SCGB1A1/TRIM71 17  
 GO:0001759 BP organ induction 5/1105 22/162410.014380051 0.094179747  
 0.075462471 AR/DKK1/FGF10/FGFR1/HOXA11 5  
 GO:0014912 BP negative regulation of smooth muscle cell migration 5/1105 22/16241  
 0.014380051 0.094179747 0.075462471 ADIPOQ/IGFBP5/MYOCD/SERPINE1/SLIT2 5  
 GO:0021513 BP spinal cord dorsal/ventral patterning 5/1105 22/162410.014380051  
 0.094179747 0.075462471 GLI2/GLI3/EVX1/NKX6-2/RFX4 5  
 GO:0042738 BP exogenous drug catabolic process 5/1105 22/162410.014380051  
 0.094179747 0.075462471 CYP2B6/CYP2C19/CYP2J2/CYP3A4/NR1I2 5  
 GO:0043567 BP regulation of insulin-like growth factor receptor signaling pathway 5/1105  
 22/162410.014380051 0.094179747 0.075462471 AR/CILP/IGF1/IGFBP4/IGFBP5 5  
 GO:0086012 BP membrane depolarization during cardiac muscle cell action potential 5/1105  
 22/162410.014380051 0.094179747 0.075462471  
 ANK2/ATP1A2/CACNA1G/SCN2B/SLC8A1 5  
 GO:1904738 BP vascular associated smooth muscle cell migration 5/1105 22/16241  
 0.014380051 0.094179747 0.075462471 ADAMTS1/ADIPOQ/IGFBP5/MYOCD/TERT 5  
 GO:1904752 BP regulation of vascular associated smooth muscle cell migration 5/1105  
 22/162410.014380051 0.094179747 0.075462471  
 ADAMTS1/ADIPOQ/IGFBP5/MYOCD/TERT 5

GO:0015909 BP long-chain fatty acid transport 10/1105 67/162410.014642334  
0.095642477 0.076634498  
APOE/FABP4/PLA2G2D/SPX/THBS1/FABP1/LCN12/PLA2G12B/PLA2G2F/PLA2G4F 10

GO:0086001 BP cardiac muscle cell action potential 10/1105 67/162410.014642334  
0.095642477 0.076634498  
ANK2/ATP1A2/CACNA1G/CTNNA3/FLNA/KCNA5/KCNE4/KCNJ5/SCN2B/SLC8A1 10

GO:0051279 BP regulation of release of sequestered calcium ion into cytosol 11/1105  
77/162410.014717392 0.096005089 0.076925044  
ANK2/ATP1A2/CASQ1/CASQ2/CXCL9/JPH2/JPH4/PLN/SLC8A1/THY1/F2 11

GO:0003044 BP regulation of systemic arterial blood pressure mediated by a chemical signal  
8/1105 48/162410.014821699 0.096557273 0.077367487  
ADRB3/AGTR1/AGTR2/CMA1/CTSG/SUCNR1/NOX1/REN 8

GO:0001666 BP response to hypoxia 34/1105 339/16241 0.014962364 0.096726803  
0.077503325  
ADIPOQ/ANGPT4/CPEB1/CRYAB/CXCL12/CYBB/EDNRA/FMN2/KCNA5/KCNK2/KCNK3/KCNM  
A1/KCNMB1/MMP2/MYOC/D/NPPC/P2RX2/PENK/PTGIS/SFRP1/SLC8A1/SOD3/TGFB3/THBS1/VCA  
M1/ASCL2/BMP7/EPO/FABP1/GNGT1/P2RX3/PCK1/REG1A/TERT 34

GO:0001990 BP regulation of systemic arterial blood pressure by hormone 7/1105  
39/162410.014965873 0.096726803 0.077503325  
AGTR1/AGTR2/CMA1/CTSG/SUCNR1/NOX1/REN 7

GO:0030049 BP muscle filament sliding 7/1105 39/162410.014965873 0.096726803  
0.077503325 ACTN2/DES/MYL3/TNNT3/TPM2/VIM/MYH4 7

GO:0033275 BP actin-myosin filament sliding 7/1105 39/162410.014965873 0.096726803  
0.077503325 ACTN2/DES/MYL3/TNNT3/TPM2/VIM/MYH4 7

GO:0070741 BP response to interleukin-6 7/1105 39/162410.014965873 0.096726803  
0.077503325 C1QTNF4/PTGIS/ABCC2/FGF23/FGG/FOXA2/PCK1 7

GO:0098815 BP modulation of excitatory postsynaptic potential 7/1105 39/16241  
0.014965873 0.096726803 0.077503325  
CBLN1/IGSF11/NETO1/NLGN1/RELN/RGS4/SHANK1 7

GO:0006941 BP striated muscle contraction 19/1105 163/16241 0.015028464  
0.097003701 0.077725193  
ANK2/ATP1A2/CACNA1G/CASQ1/CASQ2/CTNNA3/FLNA/KCNA5/KCNE4/KCNJ5/MYL3/PLN/S  
CN2B/SGCD/SLC8A1/SMPX/STAC/SYNN/TNNT3 19

GO:0050768 BP negative regulation of neurogenesis 29/1105 279/16241 0.015049289  
0.097010637 0.07773075  
ADCYAP1/APOE/COL3A1/DKK1/DPYSL3/EPHA7/GLI3/MAG/NGFR/NLGN1/NRG3/PTPRS/RGM  
A/SLIT2/SOX10/SPOCK1/STMN2/SYT4/THY1/TNN/TNR/VIM/ASCL2/BMP7/F2/NKX6-2/NR2E1/SIX  
3/TERT 29

GO:0030168 BP platelet activation 18/1105 152/16241 0.015182576 0.097613633  
0.078213907  
APOE/AXL/CLEC1B/COL1A1/COL1A2/COL3A1/COMP/FLNA/GP5/MYL9/P2RY12/PRKCB/SELP/  
F2/FGA/FGB/FGG/HRG 18

GO:0055067 BP monovalent inorganic cation homeostasis 18/1105 152/16241  
0.015182576 0.097613633 0.078213907

AGTR1/AGTR2/ATP1A2/ATP1A4/C7/KCNA5/KCNMA1/SCN7A/SLC12A3/SLC8A1/SPX/TAC1/AT  
 P6V1C2/CYP4F2/NOX1/RHCG/SLC26A3/SLC9A2 18  
 GO:0007229 BP integrin-mediated signaling pathway 13/1105 98/162410.015294647  
 0.098077421 0.078585521  
 ADAMTS1/COL3A1/FERMT2/FLNA/ITGA11/ITGAD/ITGB2/ITGBL1/LIMS2/PLP1/THY1/APOA1/  
 CDH17 13  
 GO:0060079 BP excitatory postsynaptic potential 13/1105 98/162410.015294647  
 0.098077421 0.078585521  
 CBLN1/CHRNA3/CHRNA6/GRIK5/IGSF11/NETO1/NLGN1/P2RX2/RELN/RGS4/SHANK1/NPFF/  
 P2RX3 13  
 GO:1903532 BP positive regulation of secretion by cell 38/1105 389/16241 0.015621411  
 0.0998668 0.08001928  
 ADCYAP1/AGTR2/AKAP12/BLK/C1QTNF4/CACNA1G/CARTPT/CCL19/CLEC6A/CLEC9A/CNR1/  
 CRTAM/CSF1R/CXCL12/FCN1/FGFR1/GRP/IGF1/ITGB2/KCNB1/NLGN1/RETN/SYT4/TAC1/TACR2/T  
 GFB3/TLR8/VIP/FGA/FGB/FGG/IL17A/IL17F/KISS1/ORM1/ORM2/RFX6/TFR2 38  
 GO:0034330 BP cell junction organization 29/1105 280/16241 0.015736491  
 0.0998668 0.08001928  
 ACTN2/ANK2/CADM3/CDH10/CDH11/CDH19/CDH2/CSF1R/EPHA3/FERMT2/FLNA/FLNC/FN  
 1/HEG1/LIMS2/MYOC/NFASC/PECAM1/RASSF8/SFRP1/SORBS1/TGFB3/THBS1/THY1/TNS1/CDH1  
 7/CLDN9/DSG1/HRG 29  
 GO:0010518 BP positive regulation of phospholipase activity 9/1105 58/162410.015783385  
 0.0998668 0.08001928  
 ADCYAP1R1/AGTR1/EDNRA/FGF2/FGFR1/HTR2A/NTRK2/P2RY12/PDGFRB9  
 GO:0017001 BP antibiotic catabolic process 9/1105 58/162410.015783385 0.0998668  
 0.08001928 MPO/TPO/ADH7/AKR1B10/APOA4/DUOX2/PCK1/SULT2A1/UGT1A1 9  
 GO:0061053 BP somite development 12/1105 88/162410.015797495 0.0998668  
 0.08001928  
 DKK1/FRZB/MEOX2/RIPPLY2/ROR2/SFRP1/SFRP2/TBX18/ZEB2/CDX1/CDX2/IHH 12  
 GO:0070167 BP regulation of biomineral tissue development 12/1105 88/16241  
 0.015797495 0.0998668 0.08001928  
 ASPN/COMP/DDR2/GREM1/MGP/OMD/SLC8A1/TGFB3/TMEM119/ADGRV1/BMP7/FGF23  
 12  
 GO:1904894 BP positive regulation of STAT cascade 12/1105 88/162410.015797495  
 0.0998668 0.08001928  
 CSF1R/CYP1B1/FLT3/GHR/IGF1/IL10RA/IL12B/IL21/IL31RA/PECAM1/EPO/F2 12  
 GO:0031348 BP negative regulation of defense response 22/1105 198/16241  
 0.015827108 0.0998668 0.08001928  
 A2M/ADCYAP1/ADIPOQ/APOE/CR1/ELANE/FCGR2B/FGL2/IGF1/IL12B/KRT1/LRFN5/NPY5R/P  
 TGIS/PTPRC/SERPINF1/SERPING1/SIGLEC10/VSIG4/APOA1/CXCL17/F2 22  
 GO:0033604 BP negative regulation of catecholamine secretion 4/1105 15/16241  
 0.015878659 0.0998668 0.08001928 AGTR2/CNR1/P2RY12/SYT4 4  
 GO:0046851 BP negative regulation of bone remodeling 4/1105 15/162410.015878659  
 0.0998668 0.08001928 CARTPT/GREM1/SFRP1/TMEM1194  
 GO:0050651 BP dermatan sulfate proteoglycan biosynthetic process 4/1105 15/16241

0.015878659 0.0998668 0.08001928 BGN/DCN/DSEL/VCAN 4  
 GO:0060579 BP ventral spinal cord interneuron fate commitment 4/1105 15/16241  
 0.015878659 0.0998668 0.08001928 GLI2/GLI3/EVX1/NKX6-2 4  
 GO:0060581 BP cell fate commitment involved in pattern specification 4/1105 15/16241  
 0.015878659 0.0998668 0.08001928 GLI2/GLI3/EVX1/NKX6-2 4  
 GO:0070571 BP negative regulation of neuron projection regeneration 4/1105 15/16241  
 0.015878659 0.0998668 0.08001928 PTPRS/RGMA/THY1/TNR 4  
 GO:1905874 BP regulation of postsynaptic density organization 4/1105 15/16241  
 0.015878659 0.0998668 0.08001928 CBLN1/CDH2/LRRTM1/PTPRS4  
 GO:0001906 BP cell killing 19/1105 164/16241 0.015952068 0.100149541 0.080245828  
 CCL13/CD1C/CRTAM/CTSG/ELANE/FCER2/FCGR2B/IL12B/IL21/KLR4-KLRK1/PTPRC/DEFA1/  
 DEFB4A/F2/HRG/PGLYRP3/PGLYRP4/REG3G/SEMG1 19  
 GO:0071560 BP cellular response to transforming growth factor beta stimulus 25/1105  
 233/16241 0.015964391 0.100149541 0.080245828  
 ASPN/CILP/COL1A1/COL1A2/COL3A1/EMILIN1/FBN1/FERMT2/GDF10/GDF5/HTRA3/LRRC32  
 /LTBP1/LTBP2/MYOC/PDE3A/PENK/SFRP1/SMAD9/TGFB1I1/TGFB3/THBS1/FOLR1/FOXH1/IL17F  
 25  
 GO:0014812 BP muscle cell migration 11/1105 78/16241 0.016114887 0.100836085  
 0.080795928  
 ADAMTS1/ADIPOQ/IGF1/IGFBP5/MYOC/PDGFRB/PLEKHO1/SERPINE1/SLIT2/THBS4/TERT  
 11  
 GO:0072028 BP nephron morphogenesis 11/1105 78/16241 0.016114887 0.100836085  
 0.080795928  
 AGTR2/FGF2/GLI3/IRX1/PDGFRB/SIX2/WNT9B/BMP7/HOXA11/HOXD11/SALL11  
 GO:0060395 BP SMAD protein signal transduction 10/1105 68/16241 0.016153761  
 0.100950728 0.080887787  
 CILP/GDF10/GDF5/GDF6/ROR2/SMAD9/TGFB3/VIM/WWTR1/BMP7 10  
 GO:0061351 BP neural precursor cell proliferation 17/1105 142/16241 0.016262919  
 0.101503759 0.081330909  
 ADCYAP1/CDH2/EMX2/FGFR1/FLNA/GLI3/KCNA1/LIMS2/SOX10/ZEB2/EMX1/IGF2BP1/LHX5  
 /NR2E1/RASSF10/SIX3/TRIM71 17  
 GO:0019934 BP cGMP-mediated signaling 6/1105 31/16241 0.016591112 0.10342074  
 0.082866909 APOE/NPPC/PDE3A/THBS1/HTR2C/PDZD3 6  
 GO:0031638 BP zymogen activation 8/1105 49/16241 0.016689271 0.10363805  
 0.083041031 C1R/SERPINE1/THBS1/APOH/FGA/FGB/FGG/PRSS3 8  
 GO:0032757 BP positive regulation of interleukin-8 production 8/1105 49/16241  
 0.016689271 0.10363805 0.083041031  
 ADIPOQ/ELANE/FCN1/SERPINE1/TLR7/TLR8/TLR9/APOA2 8  
 GO:1905207 BP regulation of cardiocyte differentiation 8/1105 49/16241 0.016689271  
 0.10363805 0.083041031 DKK1/GREM1/IGF1/MYOC/PI16/PRICKLE1/RGS4/BMP7 8  
 GO:0003205 BP cardiac chamber development 19/1105 165/16241 0.016919459  
 0.104898622 0.084051077  
 ADAMTS1/ANK2/COL11A1/HAND2/HEG1/HEY1/KCNK2/LTBP1/MYL3/MYOC/NPY5R/NRP2/  
 SFRP2/SLIT2/SLIT3/ZFPM2/BMP7/FOXH1/SALL1 19

GO:0006024 BP glycosaminoglycan biosynthetic process 14/1105 110/16241  
0.017028064 0.104898622 0.084051077  
BGN/DCN/DSEL/EXTL1/HAS1/KERA/LUM/OGN/OMD/PDGFRB/PRELP/SDC3/VCAN/CHST5  
14

GO:0010927 BP cellular component assembly involved in morphogenesis 14/1105  
110/16241 0.017028064 0.104898622 0.084051077  
ACTN2/ANK2/CASQ1/CASQ2/LDB3/LMOD1/MYH11/MYOZ2/NFASC/PDGFRB/PGM5/TENM4  
/TNNT3/IHH 14

GO:0010632 BP regulation of epithelial cell migration 23/1105 211/16241 0.017064964  
0.104898622 0.084051077  
ADGRA2/AGTR2/AKT3/ANGPT4/APOE/CXCL13/DCN/FGF10/FGF2/FGF7/FGFR1/MEOX2/NRP  
2/SERPINF1/SLIT2/SMOC2/SPARC/TAC1/THBS1/APOH/FGFBP1/HRG/NR2E1 23

GO:0001974 BP blood vessel remodeling 7/1105 40/16241 0.017105822 0.104898622  
0.084051077 AGTR2/AXL/BGN/CCR2/FGF10/RSP03/HRG 7

GO:0010658 BP striated muscle cell apoptotic process 7/1105 40/16241 0.017105822  
0.104898622 0.084051077 CAMK2A/HAND2/HSPB6/MYOC/D/SFRP2/BMP7/GNGT1 7

GO:0014014 BP negative regulation of gliogenesis 7/1105 40/16241 0.017105822  
0.104898622 0.084051077 ADCYAP1/SOX10/ASCL2/F2/NKX6-2/NR2E1/TERT 7

GO:0019835 BP cytolysis 7/1105 40/16241 0.017105822 0.104898622 0.084051077  
C7/CFHR1/F2/HRG/PGLYRP3/PGLYRP4/REG3G 7

GO:0072210 BP metanephric nephron development 7/1105 40/16241 0.017105822  
0.104898622 0.084051077 ADIPOQ/AGTR2/IRX1/PDGFRB/SIX2/WNT9B/SALL1 7

GO:1904036 BP negative regulation of epithelial cell apoptotic process 7/1105 40/16241  
0.017105822 0.104898622 0.084051077  
SERPINE1/FGA/FGB/FGG/NEUROD1/SERPINB13/TERT 7

GO:0042116 BP macrophage activation 12/1105 89/16241 0.017167363 0.105144747  
0.084248288  
BPI/C1QA/FCGR2B/IL31RA/ITGB2/LRFN5/PTPRC/SUCNR1/THBS1/TLR7/TLR8/VSIG4 12

GO:0007413 BP axonal fasciculation 5/1105 23/16241 0.017369378 0.105592061  
0.084606702 CNR1/CRTAC1/EPHA3/NCAM2/NDN 5

GO:0019430 BP removal of superoxide radicals 5/1105 23/16241 0.017369378  
0.105592061 0.084606702 FBLN5/MPO/SOD3/APOA4/BMP7 5

GO:0032098 BP regulation of appetite 5/1105 23/16241 0.017369378 0.105592061  
0.084606702 CARTPT/NPY/SPX/HTR2C/NPFF 5

GO:0072215 BP regulation of metanephros development 5/1105 23/16241 0.017369378  
0.105592061 0.084606702 ADIPOQ/AGTR2/PDGFRB/WNT9B/WWTR1 5

GO:0106030 BP neuron projection fasciculation 5/1105 23/16241 0.017369378  
0.105592061 0.084606702 CNR1/CRTAC1/EPHA3/NCAM2/NDN 5

GO:1904385 BP cellular response to angiotensin 5/1105 23/16241 0.017369378  
0.105592061 0.084606702 ACTN2/AGTR1/AGTR2/CAMK2A/SLC30A10 5

GO:0006940 BP regulation of smooth muscle contraction 9/1105 59/16241 0.017535954  
0.106341489 0.085207189  
ATP1A2/CHRM2/CHRNA3/CNN1/KCNMA1/MYOC/D/SPX/TACR1/TACR2 9

GO:0014910 BP regulation of smooth muscle cell migration 9/1105 59/16241 0.017535954

0.106341489 0.085207189  
 ADAMTS1/ADIPOQ/IGF1/IGFBP5/MYOCN/PTGFRB/SERPINE1/SLIT2/TERT 9  
 GO:0055024 BP regulation of cardiac muscle tissue development 11/1105 79/16241  
 0.017609396 0.106655181 0.085458538  
 DKK1/FGF2/FGFR1/GREM1/IGF1/JPH2/KCNK2/MYOCN/PI16/RGS4/ZFPM2 11  
 GO:0050730 BP regulation of peptidyl-tyrosine phosphorylation 26/1105 247/16241  
 0.017755571 0.107278336 0.085957847  
 ADIPOQ/ANGPT4/CNTN1/CSF1R/EPHA7/FGF10/FGF7/FLT3/GHR/GREM1/HTR2A/IGF1/IL12B  
 /IL21/IL31RA/ITGB2/NTRK2/PECAM1/PTPRC/RELN/SFRP1/SFRP2/THBS4/THY1/EPO/HRG 26  
 GO:0001756 BP somitogenesis 10/1105 69/16241 0.017777802 0.107278336 0.085957847  
 DKK1/MEOX2/RIPPLY2/ROR2/SFRP1/SFRP2/TBX18/ZEB2/CDX1/CDX2 10  
 GO:0015914 BP phospholipid transport 10/1105 69/16241 0.017777802 0.107278336  
 0.085957847 APOE/ATP8B2/APOA1/APOA2/APOA4/APOA5/APOC3/ATP10B/GLTPD2/MTTP  
 10  
 GO:0018958 BP phenol-containing compound metabolic process 13/1105 100/16241  
 0.017876544 0.107741818 0.086329217  
 AGTR2/HAND2/ITGB2/MOXD1/TPO/ZEB2/DDC/DUOX2/DUOXA2/IYD/PAH/PNMT/SLC45A2  
 13  
 GO:1903510 BP mucopolysaccharide metabolic process 14/1105 111/16241 0.018308803  
 0.110211816 0.088308327  
 BGN/DCN/DSGL/FGF2/HAS1/ITIH5/KERA/LUM/OGN/OMD/PRELP/SPOCK3/VCAN/CHST5 14  
 GO:0030178 BP negative regulation of Wnt signaling pathway 22/1105 201/16241  
 0.0185343 0.111412458 0.089270354  
 APOE/BARX1/BICC1/CDH2/DACT1/DACT3/DKK1/FRZB/GLI3/GREM1/HIC1/IGFBP4/PRICKLE1  
 /ROR2/SFRP1/SFRP2/SFRP4/SOX10/TBX18/TNN/WWTR1/SIX3 22  
 GO:0042737 BP drug catabolic process 16/1105 133/16241 0.018553622 0.111412458  
 0.089270354  
 DPYS/MOXD1/MPO/TPO/ADH7/APOA4/CPN1/CYP2B6/CYP2C19/CYP2J2/CYP3A4/DUOX2/N  
 R1I2/PAH/PCK1/SULT2A1 16  
 GO:0033273 BP response to vitamin 12/1105 90/16241 0.018624646 0.111702394  
 0.089502668  
 BCHE/COL1A1/FOLR2/PENK/SFRP1/SPARC/TNC/BMP7/EPO/FGF23/FOLR1/OTC12  
 GO:0001706 BP endoderm formation 8/1105 50/16241 0.01872049 0.111867452  
 0.089634922 COL11A1/COL5A1/COL6A1/COL8A1/DKK1/FN1/ITGB2/MMP2 8  
 GO:0010171 BP body morphogenesis 8/1105 50/16241 0.01872049 0.111867452  
 0.089634922 COL1A1/CRISPLD2/DKK1/GREM2/MAB21L2/MMP2/TGFB3/IHH 8  
 GO:0086002 BP cardiac muscle cell action potential involved in contraction 8/1105  
 50/16241 0.01872049 0.111867452 0.089634922  
 ANK2/CACNA1G/CTNNA3/FLNA/KCNA5/KCNE4/KCNJ5/SCN2B 8  
 GO:0022408 BP negative regulation of cell-cell adhesion 19/1105 167/16241  
 0.018990867 0.113345245 0.090819019  
 ADIPOQ/CCL21/CLEC4G/CXCL12/FCGR2B/FGL2/GLI3/GPNMB/LRRC32/PLA2G2D/TNR/VSIG4  
 /ADTRP/APOA1/FGG/IHH/MUC21/PLA2G2F/SCGB1A1 19  
 GO:0031032 BP actomyosin structure organization 21/1105 190/16241 0.019092112

0.113811232 0.091192396  
 ACTN2/CASQ1/CASQ2/CNN1/ELN/FRMD6/LDB3/LMOD1/LURAP1/MYH11/MYOC/MYOZ2/P  
 DGFRB/PGM5/SFRP1/SORBS1/TAC1/TGFB3/TMEFF2/TNNT3/APOA1 21  
 GO:0003338 BP metanephros morphogenesis 6/1105 32/162410.01927715 0.114359129  
 0.091631404 AGTR2/FGF10/PDGFRB/SIX2/WNT9B/SALL1 6  
 GO:0014808 BP release of sequestered calcium ion into cytosol by sarcoplasmic reticulum  
 6/1105 32/162410.01927715 0.114359129 0.091631404  
 ANK2/ATP1A2/CASQ1/CASQ2/PLN/SLC8A1 6  
 GO:1903523 BP negative regulation of blood circulation 6/1105 32/162410.01927715  
 0.114359129 0.091631404 AGTR2/ATP1A2/PLN/SPX/TAC1/NPFF 6  
 GO:1904707 BP positive regulation of vascular smooth muscle cell proliferation 6/1105  
 32/162410.01927715 0.114359129 0.091631404  
 ADAMTS1/FGF2/IGF1/IGFBP5/MMP2/TERT 6  
 GO:0034394 BP protein localization to cell surface 9/1105 60/162410.019426116  
 0.114846232 0.0920217  
 ACTN2/ANK2/FBLN5/FCN1/FGF10/FGF7/FLNA/GPIHBP1/MAP1A 9  
 GO:0033344 BP cholesterol efflux 7/1105 41/162410.019452782 0.114846232  
 0.0920217 ADIPOQ/APOE/APOA1/APOA2/APOA4/APOA5/APOC3 7  
 GO:0051489 BP regulation of filopodium assembly 7/1105 41/162410.019452782  
 0.114846232 0.0920217 CCL21/CCR7/DPYSL3/GAP43/GPM6A/NLGN1/TGFB3 7  
 GO:2001222 BP regulation of neuron migration 7/1105 41/162410.019452782  
 0.114846232 0.0920217 CAMK2A/COL3A1/FLNA/FLRT2/NRG3/RELN/TNN 7  
 GO:0032945 BP negative regulation of mononuclear cell proliferation 10/1105 70/16241  
 0.019518993 0.114960782 0.092113484  
 CLEC4G/FCGR2B/GPNMB/LRRC32/PLA2G2D/TNFRSF13B/VSIG4/IHH/PLA2G2F/SCGB1A1 10  
 GO:0050672 BP negative regulation of lymphocyte proliferation 10/1105 70/16241  
 0.019518993 0.114960782 0.092113484  
 CLEC4G/FCGR2B/GPNMB/LRRC32/PLA2G2D/TNFRSF13B/VSIG4/IHH/PLA2G2F/SCGB1A1 10  
 GO:0002922 BP positive regulation of humoral immune response 4/1105 16/16241  
 0.020054507 0.117131674 0.093852934 CCR7/FCER2/FCGR2B/PTPRC 4  
 GO:0010820 BP positive regulation of T cell chemotaxis 4/1105 16/162410.020054507  
 0.117131674 0.093852934 CCL21/CCR2/CXCL13/S100A7 4  
 GO:0035930 BP corticosteroid hormone secretion 4/1105 16/162410.020054507  
 0.117131674 0.093852934 AGTR1/AGTR2/TAC1/REN 4  
 GO:0036149 BP phosphatidylinositol acyl-chain remodeling 4/1105 16/162410.020054507  
 0.117131674 0.093852934 PLA2G2D/PLA2G2F/PLA2G4E/PLA2G4F 4  
 GO:0050655 BP dermatan sulfate proteoglycan metabolic process 4/1105 16/16241  
 0.020054507 0.117131674 0.093852934 BGN/DCN/DSEL/VCAN 4  
 GO:0072488 BP ammonium transmembrane transport 4/1105 16/162410.020054507  
 0.117131674 0.093852934 SLC18A3/RHBG/RHCG/SLC25A48 4  
 GO:2000846 BP regulation of corticosteroid hormone secretion 4/1105 16/16241  
 0.020054507 0.117131674 0.093852934 AGTR1/AGTR2/TAC1/REN 4  
 GO:0006022 BP aminoglycan metabolic process 19/1105 168/16241 0.020097517  
 0.117215078 0.093919762

BGN/DCN/DSEL/EXTL1/FGF2/HAS1/ITIH5/KERA/LUM/OGN/OMD/PDGFRB/PRELP/SDC3/SPOCK3/VCAN/CHST5/PGLYRP3/PGLYRP4 19

GO:0022604 BP regulation of cell morphogenesis 44/1105 471/16241 0.020116513  
0.117215078 0.093919762

ADGRB3/APOE/BVES/CACNG7/CCL13/CDH2/CHODL/CHRNA3/CSF1R/CXCL12/EPHA7/FBLN1/FERMT2/FLNA/FN1/ITGB2/LIMS2/LRRC4C/MAG/MYOC/NEFL/NGF/NGFR/NLGN1/NTRK2/PLEKH01/PLXNA4/PTPRS/RELN/SLIT2/SPARC/SYT4/THY1/TNR/ZEB2/APOA1/F2/FGA/FGB/FGG/NR2E1/OLFM4/REG1A/RHOV 44

GO:0003073 BP regulation of systemic arterial blood pressure 12/1105 91/16241  
0.02017249 0.117263041 0.093958193

ADRB3/AGTR1/AGTR2/AR/CMA1/CTSG/P2RX2/SPX/SUCNR1/CYP4F2/NOX1/REN 12

GO:0044070 BP regulation of anion transport 12/1105 91/16241 0.02017249 0.117263041  
0.093958193

AGTR2/APOE/ATP1A2/FGFR1/NPY5R/RGS4/SFRP4/SYT4/THBS1/APOA1/CYP4F2/FGF23 12

GO:0070588 BP calcium ion transmembrane transport 30/1105 298/16241 0.020326072  
0.118016155 0.094561633

ANK2/ANXA6/ATP1A2/ATP2B2/CACNA1G/CACNG7/CASQ1/CASQ2/CCL19/CCL21/CCR7/CXCL9/FGF14/FGF2/GPM6A/HTR2A/JPH2/JPH4/NALCN/P2RY12/PLN/PTPRC/SLC8A1/STAC/THY1/TLR9/ATP2C2/F2/HTR2C/TRPM5 30

GO:0030111 BP regulation of Wnt signaling pathway 34/1105 347/16241 0.020479416  
0.118611925 0.095038999

ADGRA2/APOE/BARX1/BICC1/CDH2/COL1A1/DACT1/DACT3/DKK1/FGF10/FRZB/GLI3/GREM1/HIC1/IGFBP4/PRICKLE1/ROR2/RSPO1/RSPO2/RSPO3/SFRP1/SFRP2/SFRP4/SOX10/SULF1/TBX18/TNN/WWTR1/ZEB2/ATP6V1C2/FOLR1/SALL1/SIX3/TERT 34

GO:0003433 BP chondrocyte development involved in endochondral bone morphogenesis  
5/1105 24/16241 0.020742598 0.118611925 0.095038999

COL14A1/COL6A1/COL6A2/COL6A3/VIT 5

GO:0006063 BP uronic acid metabolic process 5/1105 24/16241 0.020742598  
0.118611925 0.095038999 UGT1A1/UGT1A3/UGT1A7/UGT1A8/UGT1A9 5

GO:0010714 BP positive regulation of collagen metabolic process 5/1105 24/16241  
0.020742598 0.118611925 0.095038999 PDGFRB/TGFB3/VIM/F2/IHH 5

GO:0014829 BP vascular smooth muscle contraction 5/1105 24/16241 0.020742598  
0.118611925 0.095038999 ACTA2/COMP/EDNRA/HTR2A/SLC8A1 5

GO:0019585 BP glucuronate metabolic process 5/1105 24/16241 0.020742598  
0.118611925 0.095038999 UGT1A1/UGT1A3/UGT1A7/UGT1A8/UGT1A9 5

GO:0021871 BP forebrain regionalization 5/1105 24/16241 0.020742598 0.118611925  
0.095038999 EMX2/GLI3/EMX1/FEZF1/SIX3 5

GO:0032967 BP positive regulation of collagen biosynthetic process 5/1105 24/16241  
0.020742598 0.118611925 0.095038999 PDGFRB/TGFB3/VIM/F2/IHH 5

GO:0033687 BP osteoblast proliferation 5/1105 24/16241 0.020742598 0.118611925  
0.095038999 GREM1/NPR3/SFRP1/TMEM119/TNN 5

GO:0034162 BP toll-like receptor 9 signaling pathway 5/1105 24/16241 0.020742598  
0.118611925 0.095038999 LILRA4/PTPRS/TLR7/TLR8/TLR9 5

GO:0045956 BP positive regulation of calcium ion-dependent exocytosis 5/1105

24/162410.020742598 0.118611925 0.095038999 CACNA1G/CNR1/KCNB1/NLGN1/SYT4  
5

GO:0060343 BP trabecula formation 5/1105 24/162410.020742598 0.118611925  
0.095038999 ADAMTS1/COL1A1/GREM1/MMP2/SFRP1 5

GO:2000311 BP regulation of AMPA receptor activity 5/1105 24/162410.020742598  
0.118611925 0.095038999 CACNG7/NLGN1/RELN/SHANK1/SHISA8 5

GO:0010717 BP regulation of epithelial to mesenchymal transition 11/1105 81/16241  
0.020904435 0.119223392 0.095528944  
COL1A1/DACT3/EPHA3/GREM1/SFRP1/SFRP2/TGFB1I1/TGFB3/WWTR1/BMP7/FOXA2 11

GO:0021545 BP cranial nerve development 8/1105 51/162410.020922346 0.119223392  
0.095528944 EGR2/GLI3/KCNA2/NRP2/PHOX2A/PLXNA4/TIFAB/SALL1 8

GO:0090102 BP cochlea development 8/1105 51/162410.020922346 0.119223392  
0.095528944 FRZB/GABRA5/GLI2/KCNK2/KCNK3/PVALB/TIFAB/GRHL3 8

GO:0003231 BP cardiac ventricle development 15/1105 124/16241 0.021174093  
0.120403201 0.096474277  
COL11A1/HAND2/HEG1/HEYL/KCNK2/LTBP1/MYL3/MYOCN/NTY5R/SFRP2/SLIT2/SLIT3/ZFP  
M2/FOXH1/SALL1 15

GO:0051961 BP negative regulation of nervous system development 30/1105 299/16241  
0.021178413 0.120403201 0.096474277  
ADCYAP1/APOE/COL3A1/DKK1/DPYSL3/EPHA7/GLI3/MAG/NGFR/NLGN1/NGR3/PTPRS/RGM  
A/SLIT2/SOX10/SPOCK1/STMN2/SYT4/THY1/TNN/TNR/VIM/ASCL2/BMP7/F2/NKX6-2/NR2E1/RFX  
4/SIX3/TERT 30

GO:0071559 BP response to transforming growth factor beta 25/1105 239/16241  
0.021228152 0.120546453 0.096589059  
ASPN/CILP/COL1A1/COL1A2/COL3A1/EMILIN1/FBN1/FERMT2/GDF10/GDF5/HTRA3/LRRC32  
/LTBP1/LTBP2/MYOCN/PDE3A/PENK/SFRP1/SMAD9/TGFB1I1/TGFB3/THBS1/FOLR1/FOXH1/IL17F  
25

GO:0030239 BP myofibril assembly 10/1105 71/162410.021381782 0.12115898  
0.097079853 ACTN2/CASQ1/CASQ2/LDB3/LMOD1/MYH11/MYOZ2/PDGFRB/PGM5/TNNT3  
10

GO:0007588 BP excretion 9/1105 61/162410.021459347 0.12115898 0.097079853  
AGTR1/AGTR2/CHRNA3/KCNMA1/SPX/TAC1/TACR2/SLC26A3/UGT1A7 9

GO:0009880 BP embryonic pattern specification 9/1105 61/162410.021459347  
0.12115898 0.097079853 FGF10/MEOX2/NRP2/RIPPLY2/TIFAB/BMP7/IHH/NOTO/TDRD5  
9

GO:0050854 BP regulation of antigen receptor-mediated signaling pathway 9/1105  
61/162410.021459347 0.12115898 0.097079853  
BLK/CCR7/CD22/CMTM3/FCGR2B/LILRB4/PRKCB/PTPRC/THY1 9

GO:2000401 BP regulation of lymphocyte migration 9/1105 61/162410.021459347  
0.12115898 0.097079853  
CCL21/CCR2/CXCL12/CXCL13/KLRC4-KLRK1/ADTRP/C10orf99/CCL20/S100A7 9

GO:0035821 BP modification of morphology or physiology of other organism 18/1105  
158/16241 0.021736651 0.122583732 0.09822145  
APOE/CCL13/CSF1R/CTSG/ELANE/FCER2/MPEG1/DEFA1/DEFB4A/F2/HRG/PGLYRP3/PGLYRP

4/REG1A/REG1B/REG3A/REG3G/SEMG1 18

GO:0042102 BP positive regulation of T cell proliferation 12/1105 92/162410.021814003  
0.122738126 0.09834516  
CCL19/CCR2/CLECL1/HLA-DPA1/HLA-DPB1/IGF1/IL12B/IL21/PTPRC/VCAM1/EPO/HHLA2 12

GO:1901655 BP cellular response to ketone 12/1105 92/162410.021814003 0.122738126  
0.09834516  
ADCY2/ADCY5/AGTR2/AR/PTGDR/PTGFR/SERPINF1/SFRP1/SOX10/TNC/ABCC2/PCK1 12

GO:0050982 BP detection of mechanical stimulus 7/1105 42/162410.022015737  
0.123590059 0.099027779 COL11A1/CXCL12/HTR2A/KCNA1/KCNK4/PHF24/ADGRV1 7

GO:2000404 BP regulation of T cell migration 7/1105 42/162410.022015737 0.123590059  
0.099027779 CCL21/CCR2/CXCL12/CXCL13/C10orf99/CCL20/S100A7 7

GO:0036293 BP response to decreased oxygen levels 34/1105 349/16241 0.022084277  
0.123833297 0.099222676  
ADIPOQ/ANGPT4/CPEB1/CRYAB/CXCL12/CYBB/EDNRA/FMN2/KCNA5/KCNK2/KCNK3/KCNM  
A1/KCNMB1/MMP2/MYOC/NPPC/P2RX2/PENK/PTGIS/SFRP1/SLC8A1/SOD3/TGFB3/THBS1/VCA  
M1/ASCL2/BMP7/EPO/FABP1/GNGT1/P2RX3/PCK1/REG1A/TERT 34

GO:0051592 BP response to calcium ion 17/1105 147/16241 0.022141139 0.124010577  
0.099364724  
CASQ2/KCNMA1/KCNMB1/NLGN1/PENK/SPARC/SUCNR1/SYT11/SYT4/SYT6/THBS1/ADGRV1  
/APOBEC1/CHP2/FGA/FGB/FGG 17

GO:0042339 BP keratan sulfate metabolic process 6/1105 33/162410.022244757  
0.12430745 0.099602596 KERA/LUM/OGN/OMD/PRELP/CHST5 6

GO:1903514 BP release of sequestered calcium ion into cytosol by endoplasmic reticulum  
6/1105 33/162410.022244757 0.12430745 0.099602596  
ANK2/ATP1A2/CASQ1/CASQ2/PLN/SLC8A1 6

GO:1990748 BP cellular detoxification 13/1105 103/16241 0.022349009 0.124748102  
0.099955673  
APOE/FBLN5/MPO/SOD3/TPO/TXNDC2/AKR1B10/APOA4/BMP7/DUOX2/FABP1/GSTA1/IYD  
13

GO:0034332 BP adherens junction organization 16/1105 136/16241 0.022441164  
0.125079389 0.10022112  
ACTN2/CADM3/CDH10/CDH11/CDH19/CDH2/EPHA3/FERMT2/MYOC/RASSF8/SFRP1/SORBS  
1/THBS1/THY1/CDH17/HRG 16

GO:0090090 BP negative regulation of canonical Wnt signaling pathway 19/1105  
170/16241 0.022459288 0.125079389 0.10022112  
APOE/BICC1/CDH2/DACT1/DACT3/DKK1/FRZB/GLI3/GREM1/IGFBP4/PRICKLE1/ROR2/SFRP1  
/SFRP2/SFRP4/SOX10/TBX18/TNN/WWTR1 19

GO:0006023 BP aminoglycan biosynthetic process 14/1105 114/16241 0.022590964  
0.125528073 0.100580633  
BGN/DCN/DSEL/EXTL1/HAS1/KERA/LUM/OGN/OMD/PDGFRB/PRELP/SDC3/VCAN/CHST5  
14

GO:0072089 BP stem cell proliferation 14/1105 114/16241 0.022590964 0.125528073  
0.100580633  
FBLN1/FGF2/FGFR1/GLI3/KCNA1/PTPRC/SFRP2/SIX2/SOX10/NR2E1/OVOL1/SIX3/TERT/TRIM

71 14

GO:0045778 BP positive regulation of ossification 11/1105 82/162410.022712319  
0.126059787 0.101006674  
DDR2/GLI3/IGF1/NPPC/SFRP2/SLC8A1/TAC1/TGFB3/TMEM119/ADGRV1/BMP7 11

GO:0009743 BP response to carbohydrate 23/1105 217/16241 0.022961008  
0.127296241 0.101997395  
ADCY5/ADIPOQ/CMA1/COL4A3/COL6A2/COLEC12/EPHA5/GRIK5/KCNB1/P2RX2/PRKCB/PTP  
RN/SERPINF1/SLC8A1/SPARC/THBS1/APOA2/FOXA2/MLXIPL/NEUROD1/P2RX3/PCK1/RFX6 23

GO:0045661 BP regulation of myoblast differentiation 8/1105 52/162410.023301569  
0.12903868 0.103393542  
BOC/CMTM5/CXCL9/MYOCN/PRICKLE1/RANBP3L/RBM24/SMYD1 8

GO:0034764 BP positive regulation of transmembrane transport 21/1105 194/16241  
0.023492808 0.12995121 0.104124716  
ACTN2/ADIPOQ/ANK2/CASQ1/CCR2/CLIP3/CXCL9/FGF14/FLNA/HTR3A/IGF1/JPH2/KCNA1/K  
CNMB1/LRRC38/RELN/SORBS1/STAC/THY1/F2/TERT 21

GO:0098869 BP cellular oxidant detoxification 12/1105 93/162410.023552249 0.130133463  
0.104270748  
APOE/FBLN5/MPO/SOD3/TPO/TXNDC2/APOA4/BMP7/DUOX2/FABP1/GSTA1/IYD 12

GO:0048608 BP reproductive structure development 40/1105 426/16241 0.023960401  
0.132218573 0.105941463  
ADAMTS1/ADCYAP1/AR/AXL/CYP7B1/DCN/DHH/FGF10/FLNA/GLI2/GLI3/MYOCN/NRK/PCYT  
1B/PDGFRB/PTGIS/PTPRN/RETN/ROR2/RSPO3/SERPINF1/SFRP1/SFRP2/SLIT2/SLIT3/SULF1/TIFAB  
/TNC/UTF1/WNT9B/ZFPM2/ASCL2/BMP7/CDX2/DLX3/HOXA11/HOXB13/PLAC1/REN/SALL1 40

GO:0050905 BP neuromuscular process 13/1105 104/16241 0.024010376 0.132218573  
0.105941463  
ADCY5/COMP/GPR88/JPH4/KCNA1/NEFL/PENK/SHANK1/TIFAB/TNR/UCHL1/NKX6-2/USH1G  
13

GO:0099565 BP chemical synaptic transmission, postsynaptic 13/1105 104/16241  
0.024010376 0.132218573 0.105941463  
CBLN1/CHRNA3/CHRNA6/GRIK5/IGSF11/NETO1/NLGN1/P2RX2/RELN/RGS4/SHANK1/NPFF/  
P2RX3 13

GO:0003071 BP renal system process involved in regulation of systemic arterial blood  
pressure 5/1105 25/162410.024515896 0.133951147 0.107329706  
AGTR1/AGTR2/SUCNR1/CYP4F2/REN 5

GO:0010664 BP negative regulation of striated muscle cell apoptotic process 5/1105  
25/162410.024515896 0.133951147 0.107329706 HAND2/HSPB6/MYOCN/SFRP2/BMP7  
5

GO:0010882 BP regulation of cardiac muscle contraction by calcium ion signaling 5/1105  
25/162410.024515896 0.133951147 0.107329706 ANK2/ATP1A2/CASQ2/PLN/SLC8A1  
5

GO:0060571 BP morphogenesis of an epithelial fold 5/1105 25/162410.024515896  
0.133951147 0.107329706 AR/FGF10/GLI2/SULF1/BMP75

GO:0071450 BP cellular response to oxygen radical 5/1105 25/162410.024515896  
0.133951147 0.107329706 FBLN5/MPO/SOD3/APOA4/BMP7 5

GO:0071451 BP cellular response to superoxide 5/1105 25/162410.024515896  
0.133951147 0.107329706 FBLN5/MPO/SOD3/APOA4/BMP7 5

GO:0072202 BP cell differentiation involved in metanephros development 5/1105  
25/162410.024515896 0.133951147 0.107329706 ADIPOQ/SIX2/WNT9B/WWTR1/SALL1  
5

GO:0032760 BP positive regulation of tumor necrosis factor production 11/1105  
83/162410.024631901 0.134257306 0.107575018  
AKAP12/C1QTNF4/CCL19/CCR2/CYBB/IL12B/PTPRC/THBS1/TLR9/ORM1/ORM2 11

GO:0009913 BP epidermal cell differentiation 34/1105 352/16241 0.024675991  
0.134257306 0.107575018  
FGFR1/FLG/KRT1/PALLD/PTCH2/SFRP4/ATOH1/DSG1/DSG4/FOXP1/KLK12/KRT12/KRT13/KR  
T15/KRT20/KRT4/KRT6B/KRT78/KRTAP3-1/KRTAP4-1/KRTAP5-4/KRTAP5-5/OVOL1/PI3/REG3A/RE  
G3G/S100A7/SERPINB13/SPRR2A/SPRR2D/SPRR2E/SPRR2F/SPRR2G/TGM3 34

GO:0006590 BP thyroid hormone generation 4/1105 17/162410.024845255 0.134257306  
0.107575018 TPO/DUOX2/DUOX2A/IYD 4

GO:0010819 BP regulation of T cell chemotaxis 4/1105 17/162410.024845255  
0.134257306 0.107575018 CCL21/CCR2/CXCL13/S100A7 4

GO:0021514 BP ventral spinal cord interneuron differentiation 4/1105 17/16241  
0.024845255 0.134257306 0.107575018 GLI2/GLI3/EVX1/NKX6-2 4

GO:0021783 BP preganglionic parasympathetic fiber development 4/1105 17/16241  
0.024845255 0.134257306 0.107575018 EGR2/NRP2/PHOX2A/PLXNA4 4

GO:0030322 BP stabilization of membrane potential 4/1105 17/162410.024845255  
0.134257306 0.107575018 KCNK2/KCNK3/KCNK4/KCNK10 4

GO:0048532 BP anatomical structure arrangement 4/1105 17/162410.024845255  
0.134257306 0.107575018 EGR2/KCNA2/NRP2/PLXNA4 4

GO:0051818 BP disruption of cells of other organism involved in symbiotic interaction  
4/1105 17/162410.024845255 0.134257306 0.107575018 CTSG/ELANE/DEFA1/F2 4

GO:1904948 BP midbrain dopaminergic neuron differentiation 4/1105 17/16241  
0.024845255 0.134257306 0.107575018 DKK1/SFRP1/SFRP2/WNT9B 4

GO:0010876 BP lipid localization 35/1105 365/16241 0.025214607 0.136103459  
0.109054267  
ABCA8/ABCA9/ADIPOQ/AGTR1/AGTR2/APOE/ATP8B2/FABP4/PLA2G2D/RETN/SPX/TAC1/TH  
BS1/ABCC2/AKR1C4/APOA1/APOA2/APOA4/APOA5/APOC3/APOH/ATP10B/CEL/CYP4F2/FABP1/F  
ABP2/FABP6/GLTPD2/LCN12/MTPP/PCSK9/PLA2G12B/PLA2G2F/PLA2G4F/REN 35

GO:0060560 BP developmental growth involved in morphogenesis 24/1105 231/16241  
0.025373562 0.136202046 0.109133261  
APOE/CACNG7/CXCL12/DCLK1/EPHA7/FGF10/FN1/MAG/NDN/NGF/NRP2/PLXNA4/PTPRS/S  
FRP1/SFRP2/SLIT2/SLIT3/SYT4/TNC/TNR/ZEB2/EMX1/REG1A/SALL1 24

GO:0043627 BP response to estrogen 10/1105 73/162410.025489442 0.136202046  
0.109133261 DHH/GLI3/PDGFRB/PTPRN/SFRP1/TGFB3/ABCC2/APOA1/APOA2/EPO 10

GO:0048009 BP insulin-like growth factor receptor signaling pathway 6/1105 34/16241  
0.025505141 0.136202046 0.109133261 AR/CILP/GHR/IGF1/IGFBP4/IGFBP5 6

GO:0051954 BP positive regulation of amine transport 6/1105 34/162410.025505141  
0.136202046 0.109133261 CARTPT/CXCL12/KCNB1/SYT4/TACR2/VIP 6

GO:0110111 BP negative regulation of animal organ morphogenesis 6/1105 34/16241  
0.025505141 0.136202046 0.109133261 ASPN/GREM1/LIMS2/RSP02/SULF1/BMP7 6

GO:1902622 BP regulation of neutrophil migration 6/1105 34/16241 0.025505141  
0.136202046 0.109133261 CCL19/CCL21/CCR7/JAM3/SLIT2/THBS4 6

GO:0007179 BP transforming growth factor beta receptor signaling pathway 20/1105  
184/16241 0.025562378 0.136202046 0.109133261  
ASPN/COL1A2/COL3A1/EMILIN1/FBN1/FERMT2/GDF10/GDF5/HTRA3/LRRC32/LTBP1/LTBP2  
/MYOCD/SMAD9/TGFB11/TGFB3/THBS1/FOLR1/FOXH1/IL17F 20

GO:0050671 BP positive regulation of lymphocyte proliferation 15/1105 127/16241  
0.025682046 0.136202046 0.109133261  
CCL19/CCR2/CLECL1/FGF10/HLA-DPA1/HLA-DPB1/IGF1/IL12B/IL21/PTPRC/TAC1/TLR9/VCA  
M1/EPO/HHLA2 15

GO:0045766 BP positive regulation of angiogenesis 18/1105 161/16241 0.025732854  
0.136202046 0.109133261  
AGTR1/AKT3/ANGPT4/CMA1/CYBB/CYP1B1/FGF2/HSPB6/ITGB2/PRKCB/PTGIS/SERPINE1/SF  
RP2/SMOC2/THBS1/FGFBP1/NR2E1/TERT 18

GO:0050954 BP sensory perception of mechanical stimulus 18/1105 161/16241  
0.025732854 0.136202046 0.109133261  
ATP2B2/COL11A1/COL1A1/COL4A3/CXCL12/EPYC/FGFR1/GABRA5/HTR2A/KCNA1/KCNK4/P  
2RX2/PHF24/TUB/ADGRV1/GJC3/MYO1A/USH1G18

GO:0003014 BP renal system process 14/1105 116/16241 0.025835343 0.136202046  
0.109133261  
ADCY2/ADCY5/ADIPOQ/AGTR1/AGTR2/CHRNA3/KCNMA1/NPR3/SPX/SUCNR1/SULF1/TAC1/  
CYP4F2/REN 14

GO:0042471 BP ear morphogenesis 14/1105 116/16241 0.025835343 0.136202046  
0.109133261  
COL11A1/FGF10/FGFR1/FRZB/GLI2/NKX3-2/PRRX1/ROR2/SIX2/TIFAB/ATOH1/GRHL3/SALL1/  
USH1G 14

GO:1903038 BP negative regulation of leukocyte cell-cell adhesion 14/1105 116/16241  
0.025835343 0.136202046 0.109133261  
CCL21/CLEC4G/CXCL12/FCGR2B/FGL2/GLI3/GPNMB/LRRC32/PLA2G2D/VSIG4/ADTRP/IHH/P  
LA2G2F/SCGB1A1 14

GO:0046579 BP positive regulation of Ras protein signal transduction 9/1105 63/16241  
0.025976105 0.136202046 0.109133261  
COL3A1/FGF10/GPR174/IGF1/NGF/P2RY10/PDGFRB/APOA1/EPO 9

GO:0019935 BP cyclic-nucleotide-mediated signaling 22/1105 208/16241 0.026255667  
0.136202046 0.109133261  
ADCY2/ADCY5/ADCYAP1/ADCYAP1R1/ADGRB3/ADGRD1/ADRB3/APOE/CXCL9/EPHA5/GPR26  
/NPPC/PDE3A/PLN/PTGER3/PTGFR/THBS1/VIP/ADGRG7/DEFB1/HTR2C/PDZD3 22

GO:0001767 BP establishment of lymphocyte polarity 3/1105 10/16241 0.026258823  
0.136202046 0.109133261 CCL19/CCL21/CCR7 3

GO:0002713 BP negative regulation of B cell mediated immunity 3/1105 10/16241  
0.026258823 0.136202046 0.109133261 CR1/FCGR2B/C4BPB 3

GO:0002836 BP positive regulation of response to tumor cell 3/1105 10/16241 0.026258823

0.136202046 0.109133261 CRTAM/IL12B/HRG 3  
 GO:0002839 BP positive regulation of immune response to tumor cell 3/1105 10/16241  
 0.026258823 0.136202046 0.109133261 CRTAM/IL12B/HRG 3  
 GO:0002890 BP negative regulation of immunoglobulin mediated immune response 3/1105  
 10/162410.026258823 0.136202046 0.109133261 CR1/FCGR2B/C4BPB 3  
 GO:0007168 BP receptor guanylyl cyclase signaling pathway 3/1105 10/162410.026258823  
 0.136202046 0.109133261 NPPC/GUCY2C/PDZD3 3  
 GO:0030432 BP peristalsis 3/1105 10/162410.026258823 0.136202046 0.109133261  
 P2RX2/TIFAB/P2RX3 3  
 GO:0032836 BP glomerular basement membrane development 3/1105 10/16241  
 0.026258823 0.136202046 0.109133261 COL4A3/COL4A4/SULF1 3  
 GO:0033629 BP negative regulation of cell adhesion mediated by integrin 3/1105  
 10/162410.026258823 0.136202046 0.109133261 CYP1B1/SERPINE1/HRG 3  
 GO:0035376 BP sterol import 3/1105 10/162410.026258823 0.136202046 0.109133261  
 APOA1/APOA2/APOC3 3  
 GO:0038063 BP collagen-activated tyrosine kinase receptor signaling pathway 3/1105  
 10/162410.026258823 0.136202046 0.109133261 COL1A1/COL4A3/DDR2 3  
 GO:0051593 BP response to folic acid 3/1105 10/162410.026258823 0.136202046  
 0.109133261 BCHE/FOLR2/FOLR1 3  
 GO:0060281 BP regulation of oocyte development 3/1105 10/162410.026258823  
 0.136202046 0.109133261 IGF1/NPPC/PDE3A 3  
 GO:0060379 BP cardiac muscle cell myoblast differentiation 3/1105 10/162410.026258823  
 0.136202046 0.109133261 GREM1/MYOC/PRICKLE1 3  
 GO:0070508 BP cholesterol import 3/1105 10/162410.026258823 0.136202046  
 0.109133261 APOA1/APOA2/APOC3 3  
 GO:0070942 BP neutrophil mediated cytotoxicity 3/1105 10/162410.026258823  
 0.136202046 0.109133261 CTSG/ELANE/F2 3  
 GO:0072610 BP interleukin-12 secretion 3/1105 10/162410.026258823 0.136202046  
 0.109133261 CCL19/CCR7/TLR8 3  
 GO:0086070 BP SA node cell to atrial cardiac muscle cell communication 3/1105  
 10/162410.026258823 0.136202046 0.109133261 ANK2/CACNA1G/KCNA5 3  
 GO:0099550 BP trans-synaptic signaling, modulating synaptic transmission 3/1105  
 10/162410.026258823 0.136202046 0.109133261 CNR1/NTRK2/SYT4 3  
 GO:0099624 BP atrial cardiac muscle cell membrane repolarization 3/1105 10/16241  
 0.026258823 0.136202046 0.109133261 FLNA/KCNA5/KCNJ5 3  
 GO:1904338 BP regulation of dopaminergic neuron differentiation 3/1105 10/16241  
 0.026258823 0.136202046 0.109133261 DKK1/SFRP1/SFRP2 3  
 GO:1905879 BP regulation of oogenesis 3/1105 10/162410.026258823 0.136202046  
 0.109133261 IGF1/NPPC/PDE3A 3  
 GO:0048588 BP developmental cell growth 23/1105 220/16241 0.026445248  
 0.136887857 0.109682774  
 AGTR2/APOE/CACNG7/CXCL12/DCLK1/EPHA7/FN1/IGF1/MAG/NDN/NGF/NRP2/PI16/PLXNA  
 4/PTPRS/RGS4/SLIT2/SLIT3/SYT4/TNR/ZEB2/EMX1/REG1A 23  
 GO:0061458 BP reproductive system development 40/1105 429/16241 0.026446779

0.136887857 0.109682774  
 ADAMTS1/ADCYAP1/AR/AXL/CYP7B1/DCN/DHH/FGF10/FLNA/GLI2/GLI3/MYOC/NRK/PCYT  
 1B/PDGFRB/PTGIS/PTPRN/RETN/ROR2/RSP03/SERPINF1/SFRP1/SFRP2/SLIT2/SLIT3/SULF1/TIFAB  
 /TNC/UTF1/WNT9B/ZFPM2/ASCL2/BMP7/CDX2/DLX3/HOXA11/HOXB13/PLAC1/REN/SALL1 40  
 GO:0035725 BP sodium ion transmembrane transport 16/1105 139/16241 0.026915118  
 0.139018988 0.111390364  
 ATP1A2/ATP1A4/FXYD6/NALCN/NETO1/SCN11A/SCN2B/SCN7A/SLC12A3/SLC8A1/FXYD4/PC  
 SK9/SLC17A4/SLC34A3/SLC9A2/TRPM5 16  
 GO:0051250 BP negative regulation of lymphocyte activation 16/1105 139/16241  
 0.026915118 0.139018988 0.111390364  
 AXL/CLEC4G/FCGR2B/FGL2/GLI3/GPNMB/LRRC32/PLA2G2D/SFRP1/TNFRSF13B/VSIG4/IHH/  
 PGLYRP3/PGLYRP4/PLA2G2F/SCGB1A1 16  
 GO:0051047 BP positive regulation of secretion 39/1105 417/16241 0.026970104  
 0.139156669 0.111500682  
 ADCYAP1/AGTR2/AKAP12/BLK/C1QTNF4/CACNA1G/CARTPT/CCL19/CLEC6A/CLEC9A/CNR1/  
 CRTAM/CSF1R/CXCL12/FCN1/FGFR1/GRP/IGF1/ITGB2/KCNB1/NLGN1/RETN/SYT4/TAC1/TACR2/T  
 GFB3/TLR8/VIP/CYP4F2/FGA/FGB/FGG/IL17A/IL17F/KISS1/ORM1/ORM2/RFX6/TFR2 39  
 GO:0032946 BP positive regulation of mononuclear cell proliferation 15/1105 128/16241  
 0.027332908 0.140585596 0.112645624  
 CCL19/CCR2/CLECL1/FGF10/HLA-DPA1/HLA-DPB1/IGF1/IL12B/IL21/PTPRC/TAC1/TLR9/VCA  
 M1/EPO/HHLA2 15  
 GO:0046887 BP positive regulation of hormone secretion 15/1105 128/16241  
 0.027332908 0.140585596 0.112645624  
 ADCYAP1/BLK/CARTPT/FGFR1/GRP/RETN/TAC1/TACR2/VIP/FGA/FGB/FGG/KISS1/RFX6/TFR2  
 15  
 GO:0060048 BP cardiac muscle contraction 15/1105 128/16241 0.027332908  
 0.140585596 0.112645624  
 ANK2/ATP1A2/CACNA1G/CASQ2/CTNNA3/FLNA/KCNA5/KCNE4/KCNJ5/MYL3/PLN/SCN2B/S  
 GCD/SLC8A1/TNNT3 15  
 GO:0006690 BP icosanoid metabolic process 13/1105 106/16241 0.027604477  
 0.141833883 0.113645827  
 CYP1B1/GGT5/PTGDS/PTGIS/AKR1C4/CYP2B6/CYP2C19/CYP2J2/CYP4F2/CYP4F8/GGT6/GST  
 A1/PLA2G4F 13  
 GO:0002686 BP negative regulation of leukocyte migration 7/1105 44/16241 0.027823041  
 0.142658433 0.114306506 CCL21/CXCL12/EMILIN1/GREM1/KLRC4-KLRK1/SLIT2/ADTRP  
 7  
 GO:0086009 BP membrane repolarization 7/1105 44/16241 0.027823041 0.142658433  
 0.114306506 ANK2/ATP1A2/CASQ2/FLNA/KCNA5/KCNE4/KCNJ5 7  
 GO:0050731 BP positive regulation of peptidyl-tyrosine phosphorylation 20/1105  
 186/16241 0.028290493 0.144903967 0.116105763  
 ADIPOQ/ANGPT4/CNTN1/CSF1R/FGF10/FGF7/FLT3/GHR/GREM1/HTR2A/IGF1/IL12B/IL21/IL  
 31RA/NTRK2/PECAM1/PTPRC/RELN/THBS4/EPO 20  
 GO:0002697 BP regulation of immune effector process 36/1105 381/16241 0.028520601  
 0.145492174 0.11657707

A2M/C1QA/C1QB/C1QC/C1R/C1S/C7/CCL19/CCR2/CD1C/CD22/CFHR1/CLC/CLEC4G/CR1/CR2/CRTAM/FCER2/FCGR2B/FGL2/IL12B/IL21/ITGB2/KLRC4-KLRK1/PTPRC/SERPING1/TGFB3/TLR9/VSIG4/APOA1/APOA2/C4BPB/CPN1/F2/PGLYRP3/PGLYRP4 36

GO:0010524 BP positive regulation of calcium ion transport into cytosol 8/1105  
54/162410.028617527 0.145492174 0.11657707  
ADCYAP1R1/CASQ1/CXCL9/JPH2/P2RX2/THY1/F2/P2RX3 8

GO:0051235 BP maintenance of location 31/1105 319/16241 0.028697398 0.145492174  
0.11657707  
ANK2/ANXA6/APOE/ATP1A2/CASQ1/CASQ2/CCL19/CCL21/CCR7/CXCL9/FBN1/FGF2/FLNA/GRIK5/HTR2A/IGSF11/JPH2/JPH4/LTBP1/PLN/PTPRC/SHANK1/SLC8A1/SYNE1/THY1/APOA1/F2/HTR2C/LCN2/S100A7/SUN3 31

GO:0006817 BP phosphate ion transport 5/1105 26/162410.028703204 0.145492174  
0.11657707 ADAMTS8/FGFR1/SFRP4/FGF23/SLC34A3 5

GO:0035640 BP exploration behavior 5/1105 26/162410.028703204 0.145492174  
0.11657707 AGTR2/APOE/LRRTM1/PENK/TNR 5

GO:0036296 BP response to increased oxygen levels 5/1105 26/162410.028703204  
0.145492174 0.11657707 COL1A1/KCNA5/PDGFRB/EPO/NOX1 5

GO:0045992 BP negative regulation of embryonic development 5/1105 26/16241  
0.028703204 0.145492174 0.11657707 COL5A1/DKK1/SFRP2/SULF1/BMP7 5

GO:0050855 BP regulation of B cell receptor signaling pathway 5/1105 26/16241  
0.028703204 0.145492174 0.11657707 BLK/CD22/CMTM3/FCGR2B/PRKCB 5

GO:0055083 BP monovalent inorganic anion homeostasis 5/1105 26/162410.028703204  
0.145492174 0.11657707 SFRP4/SLC12A3/ABCC2/FGF23/SLC34A3 5

GO:0008544 BP epidermis development 42/1105 457/16241 0.028805612 0.145492174  
0.11657707  
DKK1/FGF10/FGF7/FGFR1/FLG/IGFBP5/KRT1/PALLD/PTCH2/SFRP4/ATOH1/DSG1/DSG4/FOXN1/GRHL3/HOXB13/HOXC13/KLK12/KRT12/KRT13/KRT15/KRT20/KRT4/KRT6B/KRT78/KRTAP3-1/KRTAP4-1/KRTAP5-4/KRTAP5-5/OVOL1/PI3/RBP2/REG3A/REG3G/S100A7/SERPINB13/SPRR2A/SPRR2D/SPRR2E/SPRR2F/SPRR2G/TGM3 42

GO:0007193 BP adenylate cyclase-inhibiting G protein-coupled receptor signaling pathway  
11/1105 85/162410.028820009 0.145492174 0.11657707  
ADCY2/ADCY5/AKAP12/CHRM2/EDNRA/FLNA/GRIK3/NPR3/NPY1R/P2RY12/S1PR3 11

GO:0014068 BP positive regulation of phosphatidylinositol 3-kinase signaling 11/1105  
85/162410.028820009 0.145492174 0.11657707  
DCN/FGFR1/FLT3/IGF1/MYOC/NTRK2/PDGFRB/RELN/SELP/EPO/F2 11

GO:0043535 BP regulation of blood vessel endothelial cell migration 11/1105 85/16241  
0.028820009 0.145492174 0.11657707  
AGTR2/AKT3/ANGPT4/APOE/FGF2/FGFR1/MEOX2/THBS1/FGFBP1/HRG/NR2E1 11

GO:1903557 BP positive regulation of tumor necrosis factor superfamily cytokine production  
11/1105 85/162410.028820009 0.145492174 0.11657707  
AKAP12/C1QTNF4/CCL19/CCR2/CYBB/IL12B/PTPRC/THBS1/TLR9/ORM1/ORM2 11

GO:0007224 BP smoothened signaling pathway 15/1105 129/16241 0.029061117  
0.146145596 0.117100631  
BOC/DHH/EVC/EVC2/FGF10/GAS1/GLI2/GLI3/PRRX1/PTCH2/ROR2/SFRP1/WNT9A/IHH/RFX

4 15

GO:0042476 BP odontogenesis 15/1105 129/16241 0.029061117 0.146145596  
0.117100631  
ASPN/COL1A1/COL1A2/FGF10/GLI2/GLI3/GNAO1/HAND2/RSPO2/SERPINE1/TGFB3/TNC/B  
MP7/CEMP1/DLX3 15

GO:0033762 BP response to glucagon 6/1105 35/16241 0.029068454 0.146145596  
0.117100631 ADCY2/ADCY5/CDO1/GLP2R/ABCC2/PCK1 6

GO:0046006 BP regulation of activated T cell proliferation 6/1105 35/16241 0.029068454  
0.146145596 0.117100631 CLC/IGF1/IL12B/LRRC32/EPO/HHLA2 6

GO:0017158 BP regulation of calcium ion-dependent exocytosis 13/1105 107/16241  
0.029542228 0.148224131 0.118766078  
CACNA1G/CAMK2A/CHRM2/CHRNA6/CNR1/GRIK5/HTR2A/KCNB1/NLGN1/PRKCB/SYT11/SY  
T4/SYT6 13

GO:0032526 BP response to retinoic acid 13/1105 107/16241 0.029542228 0.148224131  
0.118766078  
BRINP3/COL1A1/DKK1/EPHA3/PDGFRB/RORB/RXRG/SERPINF1/TNC/WNT9A/WNT9B/PCK1/  
TRIML2 13

GO:0030534 BP adult behavior 16/1105 141/16241 0.030246912 0.151092984  
0.121064775  
ALK/ATP1A2/CARTPT/CHRNA3/CXCL12/EN1/HTR2A/NPY/NRXN2/NRXN3/SEZ6L/SHANK1/SLI  
TRK5/UCHL1/FOXA2/PPP1R1B 16

GO:0030277 BP maintenance of gastrointestinal epithelium 4/1105 18/16241 0.030267813  
0.151092984 0.121064775 SERPINA3/TLR9/MUC4/NEUROD1 4

GO:0032717 BP negative regulation of interleukin-8 production 4/1105 18/16241  
0.030267813 0.151092984 0.121064775 BPI/ELANE/SSC5D/TLR9 4

GO:0048745 BP smooth muscle tissue development 4/1105 18/16241 0.030267813  
0.151092984 0.121064775 COL3A1/FOXP2/MYLK/IHH 4

GO:1904706 BP negative regulation of vascular smooth muscle cell proliferation 4/1105  
18/16241 0.030267813 0.151092984 0.121064775 ADIPOQ/CNN1/MYOCD/TGFB3 4

GO:0031424 BP keratinization 23/1105 223/16241 0.030320186 0.151200764  
0.121151135  
FLG/KRT1/DSG1/DSG4/KLK12/KRT12/KRT13/KRT15/KRT20/KRT4/KRT6B/KRT78/KRTAP3-1/K  
RTAP4-1/KRTAP5-4/KRTAP5-5/PI3/SPRR2A/SPRR2D/SPRR2E/SPRR2F/SPRR2G/TGM3 23

GO:0033628 BP regulation of cell adhesion mediated by integrin 7/1105 45/16241  
0.031082686 0.154281566 0.123619659  
CCL21/CXCL13/CYP1B1/P2RY12/SERPINE1/SFRP2/HRG 7

GO:0043268 BP positive regulation of potassium ion transport 7/1105 45/16241  
0.031082686 0.154281566 0.123619659  
ACTN2/ANK2/FHL1/FLNA/KCNA1/KCNMB1/LRRC38 7

GO:0050706 BP regulation of interleukin-1 beta secretion 7/1105 45/16241 0.031082686  
0.154281566 0.123619659 CCL19/CCR7/TLR8/APOA1/CARD18/ORM1/ORM2 7

GO:0051932 BP synaptic transmission, GABAergic 7/1105 45/16241 0.031082686  
0.154281566 0.123619659 CNR1/GABRA5/NLGN1/NPY5R/PHF24/TAC1/GABRA4 7

GO:0014909 BP smooth muscle cell migration 9/1105 65/16241 0.031126432 0.154281566

0.123619659 ADAMTS1/ADIPOQ/IGF1/IGFBP5/MYOC/PGFRB/SERPINE1/SLIT2/TERT 9  
 GO:0032729 BP positive regulation of interferon-gamma production 9/1105 65/16241  
 0.031126432 0.154281566 0.123619659  
 CCR2/HLA-DPA1/HLA-DPB1/IL12B/IL21/KLRC4-KLRK1/TLR7/TLR8/TLR9 9  
 GO:0001657 BP ureteric bud development 12/1105 97/16241 0.031531722 0.155988703  
 0.124987519  
 AGTR2/FGF2/FGFR1/GLI3/SFRP1/SIX2/SLIT2/WNT9B/BMP7/HOXA11/HOXD11/SALL1 12  
 GO:0042743 BP hydrogen peroxide metabolic process 8/1105 55/16241 0.031566118  
 0.155988703 0.124987519 CYBB/MPO/TPO/APOA4/DUOX2/DUOX2/MMP3/NOX1 8  
 GO:1901016 BP regulation of potassium ion transmembrane transporter activity 8/1105  
 55/16241 0.031566118 0.155988703 0.124987519  
 ACTN2/ANK2/CASQ2/FHL1/KCNA1/KCNE4/LRRC38/NETO1 8  
 GO:0010001 BP glial cell differentiation 22/1105 212/16241 0.031653505 0.156106442  
 0.125081859  
 C1QA/CDH2/EGR2/FGF10/FGF5/GAP43/GLI3/LAMA2/MAG/MYOC/NTRK2/PLP1/PRDM8/RE  
 LN/ROR2/SOX10/TENM4/VIM/EMX1/F2/NKX6-2/NR2E1 22  
 GO:1903039 BP positive regulation of leukocyte cell-cell adhesion 22/1105 212/16241  
 0.031653505 0.156106442 0.125081859  
 CCL19/CCL21/CCR2/CCR7/CLECL1/ELANE/GLI2/GLI3/HLA-DPA1/HLA-DPB1/IGF1/IL12B/IL21/  
 ITGB2/KLRC4-KLRK1/LILRB4/PTPRC/THY1/VCAM1/EPO/HHLA2/IHH 22  
 GO:1905952 BP regulation of lipid localization 15/1105 131/16241 0.032757116  
 0.161387113 0.12931305  
 ADIPOQ/AGTR1/AGTR2/APOE/RETN/TAC1/THBS1/APOA1/APOA2/APOA4/APOA5/APOC3/CY  
 P4F2/PCSK9/REN 15  
 GO:0007519 BP skeletal muscle tissue development 17/1105 154/16241 0.032917874  
 0.161657968 0.129530075  
 ASB2/BVES/CASQ1/COL19A1/DCN/DKK1/EGR2/ELN/FOXP2/HEYL/MEOX2/MYOC/MYOZ2/P  
 2RX2/POPDC2/RBM24/SMYD1 17  
 GO:2000310 BP regulation of NMDA receptor activity 6/1105 36/16241 0.032943735  
 0.161657968 0.129530075 ACTN2/CCR2/GRIA1/NEFL/NLGN1/RELN 6  
 GO:2000403 BP positive regulation of lymphocyte migration 6/1105 36/16241 0.032943735  
 0.161657968 0.129530075 CCL21/CCR2/CXCL12/CXCL13/CCL20/S100A7 6  
 GO:2000725 BP regulation of cardiac muscle cell differentiation 6/1105 36/16241  
 0.032943735 0.161657968 0.129530075 DKK1/GREM1/IGF1/MYOC/PI16/RGS46  
 GO:0000303 BP response to superoxide 5/1105 27/16241 0.033316133 0.162784899  
 0.13043304 FBLN5/MPO/SOD3/APOA4/BMP7 5  
 GO:0002691 BP regulation of cellular extravasation 5/1105 27/16241 0.033316133  
 0.162784899 0.13043304 CCL21/CCR2/CXCL12/ELANE/THY1 5  
 GO:0032770 BP positive regulation of monooxygenase activity 5/1105 27/16241  
 0.033316133 0.162784899 0.13043304 AGTR2/APOE/FCER2/NPR3/TERT 5  
 GO:1901623 BP regulation of lymphocyte chemotaxis 5/1105 27/16241 0.033316133  
 0.162784899 0.13043304 CCL21/CCR2/CXCL13/KLRC4-KLRK1/S100A7 5  
 GO:0050680 BP negative regulation of epithelial cell proliferation 14/1105 120/16241  
 0.03333909 0.162784899 0.13043304

APOE/AR/GDF5/LIMS2/NGFR/SERPINF1/SFRP1/SFRP2/SPARC/SULF1/THBS1/APOH/KRT4/XD  
 H 14  
 GO:0072009 BP nephron epithelium development 13/1105 109/16241 0.033711231  
 0.163013408 0.130616135  
 ADIPOQ/AGTR2/FGF2/GLI3/HEYL/IRX1/PECAM1/SIX2/WNT9B/WWTR1/HOXA11/HOXD11/S  
 ALL113  
 GO:0072163 BP mesonephric epithelium development 12/1105 98/162410.03379736  
 0.163013408 0.130616135  
 AGTR2/FGF2/FGFR1/GLI3/SFRP1/SIX2/SLIT2/WNT9B/BMP7/HOXA11/HOXD11/SALL1 12  
 GO:0072164 BP mesonephric tubule development 12/1105 98/162410.03379736  
 0.163013408 0.130616135  
 AGTR2/FGF2/FGFR1/GLI3/SFRP1/SIX2/SLIT2/WNT9B/BMP7/HOXA11/HOXD11/SALL1 12  
 GO:1902106 BP negative regulation of leukocyte differentiation 12/1105 98/16241  
 0.03379736 0.163013408 0.130616135  
 ADIPOQ/C1QC/CARTPT/FBN1/FCGR2B/FGL2/GLI3/LILRB4/SFRP1/IHH/PGLYRP3/PGLYRP4 12  
 GO:0006801 BP superoxide metabolic process 9/1105 66/162410.033950775  
 0.163013408 0.130616135 CYBB/FBLN5/ITGB2/MPO/SOD3/APOA4/BMP7/DUOX2/NOX1  
 9  
 GO:0031343 BP positive regulation of cell killing 9/1105 66/162410.033950775  
 0.163013408 0.130616135  
 CD1C/CRTAM/FCER2/IL12B/IL21/KLRK4-KLRK1/PTPRC/PGLYRP3/PGLYRP4 9  
 GO:2000027 BP regulation of animal organ morphogenesis 25/1105 250/16241  
 0.03428948 0.163013408 0.130616135  
 AGTR2/AR/ASPN/DACT1/DKK1/FGF10/FGF7/FGFR1/FOXP2/GREM1/HAND2/LIMS2/PRICKLE  
 1/PRICKLE2/ROR2/RSPO2/RSPO3/SFRP1/SFRP2/SIX2/SULF1/WNT9B/BMP7/GRHL3/HOXA11 25  
 GO:0002002 BP regulation of angiotensin levels in blood 3/1105 11/162410.034315119  
 0.163013408 0.130616135 CMA1/CTSG/REN 3  
 GO:0002003 BP angiotensin maturation 3/1105 11/162410.034315119 0.163013408  
 0.130616135 CMA1/CTSG/REN 3  
 GO:0002674 BP negative regulation of acute inflammatory response 3/1105 11/16241  
 0.034315119 0.163013408 0.130616135 ADCYAP1/FCGR2B/NPY5R 3  
 GO:0009125 BP nucleoside monophosphate catabolic process 3/1105 11/16241  
 0.034315119 0.163013408 0.130616135 NT5C1A/NUDT10/NUDT11 3  
 GO:0014820 BP tonic smooth muscle contraction 3/1105 11/162410.034315119  
 0.163013408 0.130616135 EDNRA/HTR2A/MYLK 3  
 GO:0021561 BP facial nerve development 3/1105 11/162410.034315119 0.163013408  
 0.130616135 EGR2/NRP2/PLXNA4 3  
 GO:0021610 BP facial nerve morphogenesis 3/1105 11/162410.034315119 0.163013408  
 0.130616135 EGR2/NRP2/PLXNA4 3  
 GO:0021819 BP layer formation in cerebral cortex 3/1105 11/162410.034315119  
 0.163013408 0.130616135 GLI3/RELN/NR2E1 3  
 GO:0045060 BP negative thymic T cell selection 3/1105 11/162410.034315119  
 0.163013408 0.130616135 CCR7/GLI3/PTPRC 3  
 GO:0045351 BP type I interferon biosynthetic process 3/1105 11/162410.034315119

0.163013408 0.130616135 TLR7/TLR8/TLR9 3  
 GO:0045919 BP positive regulation of cytolysis 3/1105 11/162410.034315119  
 0.163013408 0.130616135 CFHR1/PGLYRP3/PGLYRP4 3  
 GO:0060394 BP negative regulation of pathway-restricted SMAD protein phosphorylation  
 3/1105 11/162410.034315119 0.163013408 0.130616135 DKK1/EMILIN1/GREM1 3  
 GO:0061307 BP cardiac neural crest cell differentiation involved in heart development  
 3/1105 11/162410.034315119 0.163013408 0.130616135 HAND2/BMP7/FOLR1 3  
 GO:0061308 BP cardiac neural crest cell development involved in heart development 3/1105  
 11/162410.034315119 0.163013408 0.130616135 HAND2/BMP7/FOLR1 3  
 GO:0072537 BP fibroblast activation 3/1105 11/162410.034315119 0.163013408  
 0.130616135 AKAP12/PDGFRB/IL17A 3  
 GO:0072578 BP neurotransmitter-gated ion channel clustering 3/1105 11/16241  
 0.034315119 0.163013408 0.130616135 APOE/NLGN1/RELN3  
 GO:0099151 BP regulation of postsynaptic density assembly 3/1105 11/162410.034315119  
 0.163013408 0.130616135 CBLN1/LRRTM1/PTPRS 3  
 GO:1900115 BP extracellular regulation of signal transduction 3/1105 11/16241  
 0.034315119 0.163013408 0.130616135 FBN1/GREM2/LTBP1 3  
 GO:1900116 BP extracellular negative regulation of signal transduction 3/1105  
 11/162410.034315119 0.163013408 0.130616135 FBN1/GREM2/LTBP1 3  
 GO:1903054 BP negative regulation of extracellular matrix organization 3/1105  
 11/162410.034315119 0.163013408 0.130616135 ANTXR1/EMILIN1/ADTRP 3  
 GO:2001223 BP negative regulation of neuron migration 3/1105 11/162410.034315119  
 0.163013408 0.130616135 COL3A1/NRG3/TNN 3  
 GO:0034329 BP cell junction assembly 24/1105 238/16241 0.034486912 0.163669271  
 0.131141652  
 ACTN2/ANK2/CDH10/CDH11/CDH19/CDH2/EPHA3/FERMT2/FLNA/FLNC/FN1/HEG1/LIMS2/  
 MYOC/NFASC/PECAM1/SFRP1/SORBS1/THBS1/THY1/TNS1/CDH17/DSG1/HRG 24  
 GO:0002429 BP immune response-activating cell surface receptor signaling pathway 33/1105  
 349/16241 0.034519822 0.163669271 0.131141652  
 BLK/CCR7/CD22/CLEC10A/CLEC4C/CLEC6A/CMKLR1/CMTM3/CR1/CR2/FCGR2B/FCGR3A/FC  
 N1/FPR3/HLA-DPA1/HLA-DPB1/HLA-DQA1/HLA-DQA2/HLA-DQB2/KLRK4-KLRK1/LILRB4/MS4A1/P  
 RKCB/PTPRC/THY1/WIPF1/BTNL3/BTNL8/HHLA2/MUC15/MUC17/MUC21/MUC4 33  
 GO:0060443 BP mammary gland morphogenesis 7/1105 46/162410.034588831  
 0.163807547 0.131252447 AR/CSF1R/FGF10/GLI2/GLI3/IGFBP5/NRG3 7  
 GO:0032720 BP negative regulation of tumor necrosis factor production 8/1105  
 56/162410.034715728 0.163807547 0.131252447  
 ADIPOQ/AXL/BPI/GPNMB/IGF1/LILRA4/SYT11/ORM1 8  
 GO:0042130 BP negative regulation of T cell proliferation 8/1105 56/162410.034715728  
 0.163807547 0.131252447  
 CLEC4G/GPNMB/LRRC32/PLA2G2D/VSIG4/IHH/PLA2G2F/SCGB1A1 8  
 GO:0097755 BP positive regulation of blood vessel diameter 8/1105 56/162410.034715728  
 0.163807547 0.131252447 ADCYAP1/ADRB3/AGTR2/APOE/KCNMA1/KCNMB1/NPPC/VIP  
 8  
 GO:1902041 BP regulation of extrinsic apoptotic signaling pathway via death domain

receptors 8/1105 56/162410.034715728 0.163807547 0.131252447  
 SERPINE1/SFRP1/SFRP2/THBS1/TIMP3/FGA/FGB/FGG 8  
 GO:0008589 BP regulation of smoothened signaling pathway 10/1105 77/16241  
 0.035346714 0.166624815 0.133509811  
 EVC/FGF10/GAS1/GLI3/PRRX1/PTCH2/SFRP1/WNT9A/IHH/RFX410  
 GO:0098754 BP detoxification 14/1105 121/16241 0.035438816 0.166898814  
 0.133729356  
 APOE/FBLN5/MPO/SOD3/TPO/TXNDC2/ABCC2/AKR1B10/APOA4/BMP7/DUOX2/FABP1/GST  
 A1/IYD 14  
 GO:0002040 BP sprouting angiogenesis 13/1105 110/16241 0.035947119 0.169130506  
 0.135517521  
 ADGRA2/AGTR1/AKT3/FGF2/GREM1/MEOX2/NGFR/RSPO3/SLIT2/THBS1/ADTRP/FGFBP1/NR  
 2E1 13  
 GO:0002043 BP blood vessel endothelial cell proliferation involved in sprouting angiogenesis  
 4/1105 19/162410.03633327 0.169486249 0.135802564  
 AGTR1/NGFR/THBS1/FGFBP14  
 GO:0031280 BP negative regulation of cyclase activity 4/1105 19/162410.03633327  
 0.169486249 0.135802564 CCR2/NPR3/ADGRV1/PDZD3 4  
 GO:0032026 BP response to magnesium ion 4/1105 19/162410.03633327 0.169486249  
 0.135802564 CNGA3/KCNA1/THBS1/FGF234  
 GO:0032095 BP regulation of response to food 4/1105 19/162410.03633327  
 0.169486249 0.135802564 CARTPT/NPY/SPX/NPFF 4  
 GO:0048486 BP parasympathetic nervous system development 4/1105 19/16241  
 0.03633327 0.169486249 0.135802564 EGR2/NRP2/PHOX2A/PLXNA4 4  
 GO:0086014 BP atrial cardiac muscle cell action potential 4/1105 19/162410.03633327  
 0.169486249 0.135802564 ANK2/FLNA/KCNA5/KCNJ5 4  
 GO:0086026 BP atrial cardiac muscle cell to AV node cell signaling 4/1105 19/16241  
 0.03633327 0.169486249 0.135802564 ANK2/FLNA/KCNA5/KCNJ5 4  
 GO:0086066 BP atrial cardiac muscle cell to AV node cell communication 4/1105  
 19/162410.03633327 0.169486249 0.135802564 ANK2/FLNA/KCNA5/KCNJ5 4  
 GO:1905523 BP positive regulation of macrophage migration 4/1105 19/16241  
 0.03633327 0.169486249 0.135802564 CMKLR1/P2RY12/THBS1/CXCL17 4  
 GO:0044344 BP cellular response to fibroblast growth factor stimulus 15/1105 133/16241  
 0.036784714 0.171429329 0.137359477  
 COL1A1/CXCL13/FGF10/FGF2/FGF5/FGF7/FGFR1/FLRT2/SFRP1/SMOC2/SULF1/THBS1/FGF2  
 3/FGFBP1/TRIM71 15  
 GO:0030216 BP keratinocyte differentiation 29/1105 301/16241 0.036859927  
 0.171617027 0.137509871  
 FLG/KRT1/PALLD/DSG1/DSG4/FOXN1/KLK12/KRT12/KRT13/KRT15/KRT20/KRT4/KRT6B/KRT  
 78/KRTAP3-1/KRTAP4-1/KRTAP5-4/KRTAP5-5/PI3/REG3A/REG3G/S100A7/SERPINB13/SPRR2A/SP  
 RR2D/SPRR2E/SPRR2F/SPRR2G/TGM3 29  
 GO:0042531 BP positive regulation of tyrosine phosphorylation of STAT protein 9/1105  
 67/162410.036946913 0.171859125 0.137703855  
 CSF1R/FLT3/GHR/IGF1/IL12B/IL21/IL31RA/PECAM1/EPO 9

GO:0001662 BP behavioral fear response 6/1105 37/162410.037138855 0.171937848  
0.137766932 ADCYAP1/APOE/GABRA5/PENK/HTR2C/NR2E1 6

GO:0007190 BP activation of adenylate cyclase activity 6/1105 37/162410.037138855  
0.171937848 0.137766932 ADCY2/ADCY5/ADCYAP1/ADRB3/EDNRA/VIPR2 6

GO:0010662 BP regulation of striated muscle cell apoptotic process 6/1105 37/16241  
0.037138855 0.171937848 0.137766932 CAMK2A/HAND2/HSPB6/MYOCD/SFRP2/BMP7  
6

GO:0060323 BP head morphogenesis 6/1105 37/162410.037138855 0.171937848  
0.137766932 COL1A1/CRISPLD2/DKK1/MMP2/TGFB3/IHH6

GO:0090049 BP regulation of cell migration involved in sprouting angiogenesis 6/1105  
37/162410.037138855 0.171937848 0.137766932  
AKT3/FGF2/MEOX2/THBS1/FGFBP1/NR2E1 6

GO:0030324 BP lung development 18/1105 168/16241 0.037186397 0.171995838  
0.137813398  
ADAMTS2/CRISPLD2/FGF10/FGF7/FGFR1/FOXP2/GLI2/GLI3/HEG1/HSD11B1/IGFBP5/MYOC  
D/PDGFRB/RSP02/SPARC/TGFB3/TNC/ZFPM2 18

GO:1904018 BP positive regulation of vasculature development 19/1105 180/16241  
0.037572631 0.173618779 0.139113795  
AGTR1/AKT3/ANGPT4/CMA1/CYBB/CYP1B1/FGF2/HSPB6/ITGB2/MYOCD/PRKCB/PTGIS/SER  
PINE1/SFRP2/SMOC2/THBS1/FGFBP1/NR2E1/TERT 19

GO:0044706 BP multi-multicellular organism process 22/1105 216/16241 0.03784615  
0.174718318 0.139994812  
ADCYAP1/AR/CNR1/EPYC/FBLN1/IGFBP5/MMP2/NRK/PNOC/PTGFR/PTGIS/PZP/TAC1/TGFB3  
/ABCC2/AMBP/DSG1/EPO/IHH/NPFF/SCGB1A1/SEMG1 22

GO:0001755 BP neural crest cell migration 8/1105 57/162410.038071309 0.174970873  
0.140197174 ANXA6/FN1/HAND2/NRP2/SOX10/ZEB2/BMP7/FOLR18

GO:0021954 BP central nervous system neuron development 10/1105 78/16241  
0.038174923 0.174970873 0.140197174  
CDH11/DCLK1/GLI2/NPY/NRP2/NTRK2/PLXNA4/SLIT2/ZEB2/NR2E1 10

GO:0046470 BP phosphatidylcholine metabolic process 10/1105 78/162410.038174923  
0.174970873 0.140197174  
CHAT/PCYT1B/PLA2G2D/APOA1/APOA2/APOA4/APOA5/PLA2G2F/PLA2G4E/PLA2G4F 10

GO:0055013 BP cardiac muscle cell development 10/1105 78/162410.038174923  
0.174970873 0.140197174  
ACTN2/AGTR2/BVES/IGF1/MYH11/PDGFRB/PI16/RGS4/SGCD/SLC8A1 10

GO:0043279 BP response to alkaloid 13/1105 111/16241 0.038286895 0.174970873  
0.140197174  
BCHE/CASQ2/CNR1/GNAO1/HTR2A/HTR3A/PENK/RGS4/SLC8A1/TAC1/DDC/NPFF/PPP1R1B  
13

GO:0035094 BP response to nicotine 7/1105 47/162410.038347528 0.174970873  
0.140197174 ATP1A2/CHRNA3/CHRNA6/CNR1/PENK/VCAM1/PPP1R1B 7

GO:0000305 BP response to oxygen radical 5/1105 28/162410.038363931 0.174970873  
0.140197174 FBLN5/MPO/SOD3/APOA4/BMP7 5

GO:0003180 BP aortic valve morphogenesis 5/1105 28/162410.038363931 0.174970873

0.140197174 ELN/EMILIN1/HEYL/SLIT2/SLIT3 5  
 GO:0010818 BP T cell chemotaxis 5/1105 28/162410.038363931 0.174970873  
 0.140197174 CCL21/CCR2/CXCL13/DEFA1/S100A7 5  
 GO:0032647 BP regulation of interferon-alpha production 5/1105 28/162410.038363931  
 0.174970873 0.140197174 LILRA4/PTPRS/TLR7/TLR8/TLR9 5  
 GO:0035025 BP positive regulation of Rho protein signal transduction 5/1105 28/16241  
 0.038363931 0.174970873 0.140197174 COL3A1/GPR174/P2RY10/PDGFRB/APOA1 5  
 GO:0090075 BP relaxation of muscle 5/1105 28/162410.038363931 0.174970873  
 0.140197174 ATP1A2/KCNMA1/PLN/SLC8A1/TIFAB 5  
 GO:2000352 BP negative regulation of endothelial cell apoptotic process 5/1105  
 28/162410.038363931 0.174970873 0.140197174 SERPINE1/FGA/FGB/FGG/TERT 5  
 GO:0032611 BP interleukin-1 beta production 11/1105 89/162410.038682932 0.176262117  
 0.141231797  
 CCL19/CCR7/CMA1/IGF1/S1PR3/SUCNR1/TLR8/APOA1/CARD18/ORM1/ORM2 11  
 GO:0070665 BP positive regulation of leukocyte proliferation 15/1105 134/16241  
 0.038927246 0.177210967 0.141992072  
 CCL19/CCR2/CLECL1/FGF10/HLA-DPA1/HLA-DPB1/IGF1/IL12B/IL21/PTPRC/TAC1/TLR9/VCA  
 M1/EPO/HHLA2 15  
 GO:0071300 BP cellular response to retinoic acid 9/1105 68/162410.04011875  
 0.182466017 0.146202734  
 BRINP3/COL1A1/EPHA3/RORB/SERPINF1/TNC/WNT9A/WNT9B/PCK1 9  
 GO:1901652 BP response to peptide 44/1105 494/16241 0.040288651 0.182944913  
 0.146586454  
 ACTN2/ADCY2/ADCY5/ADIPOQ/AGTR1/AGTR2/CAMK2A/CDO1/COL1A1/CPEB1/CXCL12/CYB  
 B/EGR2/FBN1/FCGR2B/GHR/GLP2R/IGF1/IGFBP5/MMP2/NEFL/NGFR/PLN/PRKCB/PTPRN/RAB31  
 /RETN/SORBS1/SPARC/VCAM1/VIM/ABCC2/APOBEC1/ATP6V1C2/BMP7/MMP3/OTC/PCK1/PCSK  
 9/REG1A/REG1B/REG3A/REG3G/SLC30A10 44  
 GO:0031668 BP cellular response to extracellular stimulus 25/1105 254/16241  
 0.040298533 0.182944913 0.146586454  
 AXL/CARTPT/COL1A1/CYBB/FOLR2/KCNB1/MAP1LC3C/MYOC/P2RY12/PENK/PTPRC/SFRP1  
 /SFRP2/TNC/VCAM1/WNT9B/DAPL1/FGF23/FOLR1/FOXA2/KRT20/LCN2/P2RX3/PCK1/PCSK9 25  
 GO:0002449 BP lymphocyte mediated immunity 24/1105 242/16241 0.040692037  
 0.184560744 0.147881155  
 C1QA/C1QB/C1QC/C1R/C1S/C7/CCR2/CD1C/CLC/CLEC4G/CR1/CR2/CRTAM/FCER2/FCGR2B/  
 FGL2/GAPT/IL12B/IL21/KLRK4-KLRK1/PTPRC/SERPING1/TLR8/C4BPB 24  
 GO:0046928 BP regulation of neurotransmitter secretion 12/1105 101/16241  
 0.041286165 0.187082695 0.149901894  
 CAMK2A/CHRM2/CHRNA3/CHRNA6/CNR1/GRIK5/HTR2A/NLGN1/PRKCB/SYT11/SYT4/TACR2  
 12  
 GO:0014033 BP neural crest cell differentiation 11/1105 90/162410.041475858  
 0.187395865 0.150152824  
 ANXA6/EDNRA/FN1/FRZB/HAND2/NRP2/SFRP1/SOX10/ZEB2/BMP7/FOLR1 11  
 GO:0042733 BP embryonic digit morphogenesis 8/1105 58/162410.041637377  
 0.187395865 0.150152824 GLI2/GLI3/HAND2/ROR2/SFRP2/HOXA11/IHH/SALL1 8

GO:1903556 BP negative regulation of tumor necrosis factor superfamily cytokine production  
8/1105 58/162410.041637377 0.187395865 0.150152824  
ADIPOQ/AXL/BPI/GPNMB/IGF1/LILRA4/SYT11/ORM1 8

GO:0001941 BP postsynaptic membrane organization 6/1105 38/162410.041660481  
0.187395865 0.150152824 APOE/CDH2/NLGN1/NRXN2/RELN/CEL 6

GO:0002209 BP behavioral defense response 6/1105 38/162410.041660481 0.187395865  
0.150152824 ADCYAP1/APOE/GABRA5/PENK/HTR2C/NR2E1 6

GO:0010659 BP cardiac muscle cell apoptotic process 6/1105 38/162410.041660481  
0.187395865 0.150152824 CAMK2A/HAND2/HSPB6/MYOC/SFRP2/GNGT1 6

GO:0070296 BP sarcoplasmic reticulum calcium ion transport 6/1105 38/16241  
0.041660481 0.187395865 0.150152824 ANK2/ATP1A2/CASQ1/CASQ2/PLN/SLC8A1 6

GO:1901381 BP positive regulation of potassium ion transmembrane transport 6/1105  
38/162410.041660481 0.187395865 0.150152824  
ACTN2/ANK2/FLNA/KCNA1/KCNMB1/LRRC38 6

GO:0003206 BP cardiac chamber morphogenesis 14/1105 124/16241 0.042306694  
0.187896443 0.150553917  
ADAMTS1/COL11A1/HAND2/HEG1/HEYL/MYL3/NPY5R/NRP2/SFRP2/SLIT2/SLIT3/ZFPM2/B  
MP7/FOXH1 14

GO:0071715 BP icosanoid transport 7/1105 48/162410.042364133 0.187896443  
0.150553917 AGTR2/PLA2G2D/ABCC2/CYP4F2/PLA2G12B/PLA2G2F/PLA2G4F 7

GO:1901571 BP fatty acid derivative transport 7/1105 48/162410.042364133  
0.187896443 0.150553917  
AGTR2/PLA2G2D/ABCC2/CYP4F2/PLA2G12B/PLA2G2F/PLA2G4F 7

GO:1905517 BP macrophage migration 7/1105 48/162410.042364133 0.187896443  
0.150553917 CCR2/CMKLR1/EMILIN1/P2RY12/ROR2/THBS1/CXCL17 7

GO:0009190 BP cyclic nucleotide biosynthetic process 4/1105 20/162410.043047145  
0.187896443 0.150553917 ADCY2/ADCY5/NPPC/GUCY2C 4

GO:0010560 BP positive regulation of glycoprotein biosynthetic process 4/1105  
20/162410.043047145 0.187896443 0.150553917 CCL19/CCL21/CCR7/IGF1 4

GO:0032332 BP positive regulation of chondrocyte differentiation 4/1105 20/16241  
0.043047145 0.187896443 0.150553917 GDF5/GDF6/GLI3/HOXA11 4

GO:0032516 BP positive regulation of phosphoprotein phosphatase activity 4/1105  
20/162410.043047145 0.187896443 0.150553917 AGTR2/PDGFRB/PTPRC/PPP1R14D  
4

GO:0033630 BP positive regulation of cell adhesion mediated by integrin 4/1105  
20/162410.043047145 0.187896443 0.150553917 CCL21/CXCL13/P2RY12/SFRP2 4

GO:0034104 BP negative regulation of tissue remodeling 4/1105 20/162410.043047145  
0.187896443 0.150553917 CARTPT/GREM1/SFRP1/TMEM1194

GO:0035813 BP regulation of renal sodium excretion 4/1105 20/162410.043047145  
0.187896443 0.150553917 AGTR1/AGTR2/SPX/TAC1 4

GO:0036150 BP phosphatidylserine acyl-chain remodeling 4/1105 20/162410.043047145  
0.187896443 0.150553917 PLA2G2D/PLA2G2F/PLA2G4E/PLA2G4F 4

GO:0042474 BP middle ear morphogenesis 4/1105 20/162410.043047145 0.187896443  
0.150553917 FGFR1/NKX3-2/PRRX1/SIX2 4

GO:0042535 BP positive regulation of tumor necrosis factor biosynthetic process 4/1105  
20/162410.043047145 0.187896443 0.150553917 AKAP12/CCR2/CYBB/THBS1 4

GO:0043586 BP tongue development 4/1105 20/162410.043047145 0.187896443  
0.150553917 BNC2/GLI3/HAND2/HOXC13 4

GO:0052652 BP cyclic purine nucleotide metabolic process 4/1105 20/162410.043047145  
0.187896443 0.150553917 ADCY2/ADCY5/NPPC/GUCY2C 4

GO:0097503 BP sialylation 4/1105 20/162410.043047145 0.187896443 0.150553917  
ST6GAL2/ST6GALNAC5/ST8SIA2/ST8SIA6 4

GO:1904469 BP positive regulation of tumor necrosis factor secretion 4/1105 20/16241  
0.043047145 0.187896443 0.150553917 AKAP12/C1QTNF4/ORM1/ORM2 4

GO:0050953 BP sensory perception of light stimulus 22/1105 219/16241 0.043047872  
0.187896443 0.150553917  
CNGA3/COL11A1/COL1A1/CYP1B1/EFEMP1/HMCN1/KERA/LUM/RORB/TIMP3/ADGRV1/CN  
GB3/CRX/CRYBA2/KRT12/NR2E1/POU6F2/REEP6/RGR/SIX3/SLC45A2/USH1G 22

GO:0010517 BP regulation of phospholipase activity 9/1105 69/162410.043469892  
0.187896443 0.150553917  
ADCYAP1R1/AGTR1/EDNRA/FGF2/FGFR1/HTR2A/NTRK2/P2RY12/PDGFRB 9

GO:0051588 BP regulation of neurotransmitter transport 15/1105 136/16241  
0.043478084 0.187896443 0.150553917  
ATP1A2/CAMK2A/CHRM2/CHRNA3/CHRNA6/CNR1/GRIK5/HTR2A/NLGN1/PRKCB/RGS4/SYT  
11/SYT4/TACR2/HTR2C 15

GO:1904064 BP positive regulation of cation transmembrane transport 15/1105  
136/16241 0.043478084 0.187896443 0.150553917  
ACTN2/ANK2/CASQ1/CCR2/CXCL9/FGF14/FLNA/JPH2/KCNA1/KCNMB1/LRRC38/RELN/STAC/  
THY1/F2 15

GO:0001886 BP endothelial cell morphogenesis 3/1105 12/162410.04349313  
0.187896443 0.150553917 COL4A4/HEG1/PECAM1 3

GO:0003337 BP mesenchymal to epithelial transition involved in metanephros morphogenesis  
3/1105 12/162410.04349313 0.187896443 0.150553917 SIX2/WNT9B/SALL13

GO:0010896 BP regulation of triglyceride catabolic process 3/1105 12/162410.04349313  
0.187896443 0.150553917 APOA4/APOA5/APOC3 3

GO:0016045 BP detection of bacterium 3/1105 12/162410.04349313 0.187896443  
0.150553917 SSC5D/PGLYRP3/PGLYRP4 3

GO:0030002 BP cellular anion homeostasis 3/1105 12/162410.04349313 0.187896443  
0.150553917 ABCC2/FGF23/SLC34A3 3

GO:0030320 BP cellular monovalent inorganic anion homeostasis 3/1105 12/16241  
0.04349313 0.187896443 0.150553917 ABCC2/FGF23/SLC34A3 3

GO:0031223 BP auditory behavior 3/1105 12/162410.04349313 0.187896443  
0.150553917 FOXP2/NRXN2/TIFAB 3

GO:0032372 BP negative regulation of sterol transport 3/1105 12/162410.04349313  
0.187896443 0.150553917 APOA2/APOC3/PCSK9 3

GO:0032375 BP negative regulation of cholesterol transport 3/1105 12/162410.04349313  
0.187896443 0.150553917 APOA2/APOC3/PCSK9 3

GO:0043116 BP negative regulation of vascular permeability 3/1105 12/162410.04349313

0.187896443 0.150553917 AKAP12/PDE3A/SLIT2 3  
 GO:0043383 BP negative T cell selection 3/1105 12/162410.04349313 0.187896443  
 0.150553917 CCR7/GLI3/PTPRC 3  
 GO:0046541 BP saliva secretion 3/1105 12/162410.04349313 0.187896443  
 0.150553917 FGF10/TAC1/TIFAB 3  
 GO:0048484 BP enteric nervous system development 3/1105 12/162410.04349313  
 0.187896443 0.150553917 EDNRA/PHOX2A/SOX10 3  
 GO:0051873 BP killing by host of symbiont cells 3/1105 12/162410.04349313  
 0.187896443 0.150553917 CTSG/ELANE/F2 3  
 GO:0055062 BP phosphate ion homeostasis 3/1105 12/162410.04349313 0.187896443  
 0.150553917 SFRP4/FGF23/SLC34A3 3  
 GO:0060442 BP branching involved in prostate gland morphogenesis 3/1105 12/16241  
 0.04349313 0.187896443 0.150553917 SFRP1/BMP7/HOXB13 3  
 GO:0061469 BP regulation of type B pancreatic cell proliferation 3/1105 12/16241  
 0.04349313 0.187896443 0.150553917 PTPRN/SFRP1/REG1A 3  
 GO:0072505 BP divalent inorganic anion homeostasis 3/1105 12/162410.04349313  
 0.187896443 0.150553917 SFRP4/FGF23/SLC34A3 3  
 GO:0072506 BP trivalent inorganic anion homeostasis 3/1105 12/162410.04349313  
 0.187896443 0.150553917 SFRP4/FGF23/SLC34A3 3  
 GO:0097090 BP presynaptic membrane organization 3/1105 12/162410.04349313  
 0.187896443 0.150553917 APOE/NLGN1/CEL 3  
 GO:0099566 BP regulation of postsynaptic cytosolic calcium ion concentration 3/1105  
 12/162410.04349313 0.187896443 0.150553917 ATP2B2/GRIA1/SLC8A1 3  
 GO:1900121 BP negative regulation of receptor binding 3/1105 12/162410.04349313  
 0.187896443 0.150553917 ADIPOQ/CRTAC1/PCSK9 3  
 GO:1905048 BP regulation of metalloproteinase activity 3/1105 12/162410.04349313  
 0.187896443 0.150553917 ANTXR1/TIMP2/TIMP3 3  
 GO:0055075 BP potassium ion homeostasis 5/1105 29/162410.043853472 0.188954611  
 0.151401785 ATP1A2/ATP1A4/KCNA5/KCNMA1/SLC12A3 5  
 GO:0070570 BP regulation of neuron projection regeneration 5/1105 29/16241  
 0.043853472 0.188954611 0.151401785 PRRX1/PTPRS/RGMA/THY1/TNR 5  
 GO:1904467 BP regulation of tumor necrosis factor secretion 5/1105 29/16241  
 0.043853472 0.188954611 0.151401785 AKAP12/C1QTNF4/SYT11/ORM1/ORM2 5  
 GO:0055017 BP cardiac muscle tissue growth 10/1105 80/162410.044291257 0.190278866  
 0.152462858 AGTR2/FGF2/FGFR1/HEG1/IGF1/KCNK2/PI16/RGS4/TENM4/ZFPM2 10  
 GO:0110110 BP positive regulation of animal organ morphogenesis 10/1105 80/16241  
 0.044291257 0.190278866 0.152462858  
 AGTR2/AR/DKK1/FGF10/FGF7/FGFR1/FOXP2/HAND2/BMP7/HOXA11 10  
 GO:0016999 BP antibiotic metabolic process 16/1105 148/16241 0.044315762  
 0.190278866 0.152462858  
 ADH1B/CYBB/MPO/TPO/ABCC2/ADH7/AKR1B10/AKR1C4/APOA4/DUOX2/DUOX2/MMP3/  
 NOX1/PCK1/SULT2A1/UGT1A1 16  
 GO:0034767 BP positive regulation of ion transmembrane transport 16/1105 148/16241  
 0.044315762 0.190278866 0.152462858

ACTN2/ANK2/CASQ1/CCR2/CXCL9/FGF14/FLNA/HTR3A/JPH2/KCNA1/KCNMB1/LRRC38/REL  
N/STAC/THY1/F2 16

GO:0002768 BP immune response-regulating cell surface receptor signaling pathway 35/1105  
382/16241 0.044537566 0.191064213 0.153092125

BLK/CCR7/CD22/CLEC10A/CLEC4C/CLEC6A/CMKLR1/CMTM3/CR1/CR2/FCER1A/FCGR2B/FC  
GR3A/FCN1/FPR3/HLA-DPA1/HLA-DPB1/HLA-DQA1/HLA-DQA2/HLA-DQB2/KLRC4-KLRK1/LILRA4/  
LILRB4/MS4A1/PRKCB/PTPRC/THY1/WIPF1/BTNL3/BTNL8/HHLA2/MUC15/MUC17/MUC21/MUC  
4 35

GO:0048706 BP embryonic skeletal system development 14/1105 125/16241  
0.044791641 0.191986512 0.153831126

COL11A1/COL1A1/DSCAML1/GLI3/NKX3-2/PRRX1/SIX2/SULF1/TGFB3/WNT9A/WNT9B/BMP  
7/HOXA11/IHH 14

GO:0045444 BP fat cell differentiation 21/1105 208/16241 0.045162469 0.193407189  
0.154969458

ADIPOQ/CLIP3/CMKLR1/EBF2/EGR2/FABP4/FGF10/FRZB/GDF10/GDF6/HTR2A/LGALS12/ME  
DAG/RETN/RUNX1T1/SFRP1/SFRP2/TGFB11/WWTR1/ZFPM2/HTR2C 21

GO:0030323 BP respiratory tube development 18/1105 172/16241 0.045206035  
0.193425126 0.154983831

ADAMTS2/CRISPLD2/FGF10/FGF7/FGFR1/FOXP2/GLI2/GLI3/HEG1/HSD11B1/IGFBP5/MYOC  
D/PDGFRB/RSP02/SPARC/TGFB3/TNC/ZFPM2 18

GO:0001658 BP branching involved in ureteric bud morphogenesis 8/1105 59/16241  
0.045417993 0.194162907 0.155574985

AGTR2/FGF2/GLI3/SIX2/WNT9B/HOXA11/HOXD11/SALL1 8

GO:0030856 BP regulation of epithelial cell differentiation 15/1105 137/16241  
0.045889533 0.19592687 0.156988378

ADIPOQ/FRZB/PTCH2/S1PR3/SERPINE1/SFRP4/WNT9B/WWTR1/ZEB2/ATOH1/FOXN1/REG3  
A/REG3G/SERPINE13/XDH 15

GO:0014013 BP regulation of gliogenesis 13/1105 114/16241 0.045950276 0.19592687  
0.156988378

ADCYAP1/CCR2/CDH2/MAG/P2RY12/SOX10/TENM4/ASCL2/EMX1/F2/NKX6-2/NR2E1/TERT  
13

GO:0055007 BP cardiac muscle cell differentiation 13/1105 114/16241 0.045950276  
0.19592687 0.156988378

ACTN2/AGTR2/BVES/DKK1/GREM1/IGF1/MYH11/MYOC/PDGFRB/PI16/RGS4/SGCD/SLC8A  
1 13

GO:0016049 BP cell growth 41/1105 460/16241 0.046005175 0.195990824  
0.157039622

AGTR1/AGTR2/APOE/CACNG7/CRYAB/CXCL12/DACT3/DCLK1/EPHA7/FBLN5/FHL1/FN1/FRZB  
/IGF1/IGFBP4/IGFBP5/IGFBPL1/MAG/MYOC/NDN/NGF/NGR3/NRP2/PI16/PLXNA4/PTCH2/PTPR  
S/RGS4/SFRP1/SFRP2/SLIT2/SLIT3/SPOCK1/SYT4/TNR/ZEB2/EMX1/F2/HRG/REG1A/TRIM40 41

GO:0001558 BP regulation of cell growth 36/1105 396/16241 0.046289837 0.19686683  
0.15774153

AGTR1/AGTR2/APOE/CACNG7/CRYAB/CXCL12/DACT3/EPHA7/FBLN5/FHL1/FN1/FRZB/IGF1/I  
GFBP4/IGFBP5/IGFBPL1/MAG/MYOC/NGF/NGR3/PI16/PLXNA4/PTCH2/PTPRS/RGS4/SFRP1/SFR

P2/SLIT2/SLIT3/SPOCK1/SYT4/TNR/F2/HRG/REG1A/TRIM40 36  
 GO:0060562 BP epithelial tube morphogenesis 30/1105 320/16241 0.046411195  
 0.19686683 0.15774153  
 AGTR2/AR/CSF1R/EDNRA/EPHA7/FGF10/FGF2/GLI2/GLI3/HAND2/IRX1/PRICKLE1/RSP02/SF  
 RP1/SFRP2/SIX2/SLIT2/TNC/WNT9B/ZEB2/BMP7/FOLR1/FOXH1/GRHL3/HOXA11/HOXD11/IHH/N  
 OTO/SALL1/TRIM71 30  
 GO:0006692 BP prostanoid metabolic process 6/1105 39/16241 0.046514046 0.19686683  
 0.15774153 PTGDS/PTGIS/AKR1C4/CYP4F8/GSTA1/PLA2G4F 6  
 GO:0006693 BP prostaglandin metabolic process 6/1105 39/16241 0.046514046  
 0.19686683 0.15774153 PTGDS/PTGIS/AKR1C4/CYP4F8/GSTA1/PLA2G4F 6  
 GO:0033574 BP response to testosterone 6/1105 39/16241 0.046514046 0.19686683  
 0.15774153 AR/FOXP2/PLN/THBS1/EPO/HOXB13 6  
 GO:0050798 BP activated T cell proliferation 6/1105 39/16241 0.046514046 0.19686683  
 0.15774153 CLC/IGF1/IL12B/LRRC32/EPO/HHLA2 6  
 GO:0009948 BP anterior/posterior axis specification 7/1105 49/16241 0.046643277  
 0.19686683 0.15774153 RIPPLY2/SIX2/TIFAB/CDX1/CDX2/FOXA2/TDRD5 7  
 GO:0019369 BP arachidonic acid metabolic process 7/1105 49/16241 0.046643277  
 0.19686683 0.15774153 CYP1B1/PTGDS/PTGIS/CYP2B6/CYP2C19/CYP2J2/CYP4F2 7  
 GO:0048260 BP positive regulation of receptor-mediated endocytosis 7/1105 49/16241  
 0.046643277 0.19686683 0.15774153  
 CCL19/CCL21/GREM1/SERPINE1/SFRP4/APOA5/PCSK9 7  
 GO:2000179 BP positive regulation of neural precursor cell proliferation 7/1105  
 49/16241 0.046643277 0.19686683 0.15774153  
 FLNA/GLI2/GLI3/SOX10/LHX5/NR2E1/RASSF10 7  
 GO:0016331 BP morphogenesis of embryonic epithelium 16/1105 149/16241  
 0.046651667 0.19686683 0.15774153  
 AR/FGF10/GLI2/IRX1/PRICKLE1/SFRP1/SFRP2/SULF1/TBX18/TGFB11/WNT9B/ZEB2/BMP7/F  
 OLR1/GRHL3/TRIM71 16  
 GO:0060538 BP skeletal muscle organ development 17/1105 161/16241 0.047136245  
 0.198740976 0.159243208  
 ASB2/BVES/CASQ1/COL19A1/DCN/DKK1/EGR2/ELN/FOXP2/HEYL/MEOX2/MYOC/MYOZ2/P  
 2RX2/POPDC2/RBM24/SMYD1 17  
 GO:0001704 BP formation of primary germ layer 13/1105 115/16241 0.048725851  
 0.205267051 0.164472292  
 COL11A1/COL5A1/COL6A1/COL8A1/DKK1/FGFR1/FN1/ITGB2/MMP2/SFRP2/SIX2/BMP7/HO  
 XA11 13  
 GO:0043550 BP regulation of lipid kinase activity 8/1105 60/16241 0.049416743  
 0.207902972 0.16658435 CCL19/CCL21/CCR7/FGF2/FLT3/P2RY12/PDGFRB/F2 8  
 GO:0050870 BP positive regulation of T cell activation 20/1105 198/16241 0.049463113  
 0.207902972 0.16658435  
 CCL19/CCL21/CCR2/CCR7/CLECL1/GLI2/GLI3/HLA-DPA1/HLA-DPB1/IGF1/IL12B/IL21/KLRK4-  
 KLRK1/LILRB4/PTPRC/THY1/VCAM1/EPO/HHLA2/IHH 20  
 GO:0048568 BP embryonic organ development 38/1105 424/16241 0.049642541  
 0.207902972 0.16658435

COL11A1/DSCAML1/EFEMP1/EN1/FBN1/FGF10/FGFR1/FRZB/GLI2/GLI3/HAND2/NKX3-2/NR  
K/PRRX1/RBPMS2/ROR2/RSPO3/SIX2/TGFB3/TIFAB/TPO/WNT9A/WNT9B/ZFPM2/ASCL2/ATOH1/  
BMP7/CDX2/FOLR1/FOXH1/GRHL3/HOXA11/IHH/NEUROD1/NOTO/SALL1/SIX3/USH1G 38

GO:0007274 BP neuromuscular synaptic transmission 5/1105 30/162410.049789274  
0.207902972 0.16658435 CHAT/CHRNA3/CHRNA6/P2RX2/P2RX3 5

GO:0016486 BP peptide hormone processing 5/1105 30/162410.049789274 0.207902972  
0.16658435 CMA1/CTSG/NGF/PCSK1/REN 5

GO:0032607 BP interferon-alpha production 5/1105 30/162410.049789274 0.207902972  
0.16658435 LILRA4/PTPRS/TLR7/TLR8/TLR9 5

GO:0060292 BP long-term synaptic depression 5/1105 30/162410.049789274  
0.207902972 0.16658435 CBLN1/GRIA1/KCNB1/SORCS2/SORCS3 5

GO:0001779 BP natural killer cell differentiation 4/1105 21/162410.050409699  
0.207902972 0.16658435 AXL/PTPRC/PGLYRP3/PGLYRP4 4

GO:0002347 BP response to tumor cell 4/1105 21/162410.050409699 0.207902972  
0.16658435 CRTAM/IGFBPL1/IL12B/HRG 4

GO:0006144 BP purine nucleobase metabolic process 4/1105 21/162410.050409699  
0.207902972 0.16658435 AOX1/GDA/TTR/XDH 4

GO:0015874 BP norepinephrine transport 4/1105 21/162410.050409699 0.207902972  
0.16658435 AGTR2/KCNB1/P2RY12/SLC6A2 4

GO:0021801 BP cerebral cortex radial glia guided migration 4/1105 21/162410.050409699  
0.207902972 0.16658435 GLI3/P2RY12/RELN/NR2E1 4

GO:0022030 BP telencephalon glial cell migration 4/1105 21/162410.050409699  
0.207902972 0.16658435 GLI3/P2RY12/RELN/NR2E1 4

GO:0035590 BP purinergic nucleotide receptor signaling pathway 4/1105 21/16241  
0.050409699 0.207902972 0.16658435 P2RX2/P2RY10/P2RY12/P2RX3 4

GO:0042403 BP thyroid hormone metabolic process 4/1105 21/162410.050409699  
0.207902972 0.16658435 TPO/DUOX2/DUOXA2/IYD 4

GO:0045061 BP thymic T cell selection 4/1105 21/162410.050409699 0.207902972  
0.16658435 CCR7/GLI3/PTPRC/FOXP1 4

GO:0048485 BP sympathetic nervous system development 4/1105 21/162410.050409699  
0.207902972 0.16658435 HAND2/NRP2/PHOX2A/PLXNA4 4

GO:0050857 BP positive regulation of antigen receptor-mediated signaling pathway 4/1105  
21/162410.050409699 0.207902972 0.16658435 CCR7/CMTM3/PRKCB/PTPRC 4

GO:0050951 BP sensory perception of temperature stimulus 4/1105 21/162410.050409699  
0.207902972 0.16658435 CXCL12/HTR2A/KCNK4/PRDM12 4

GO:0051350 BP negative regulation of lyase activity 4/1105 21/162410.050409699  
0.207902972 0.16658435 CCR2/NPR3/ADGRV1/PDZD3 4

GO:0060390 BP regulation of SMAD protein signal transduction 4/1105 21/16241  
0.050409699 0.207902972 0.16658435 CILP/GDF5/TGFB3/WWTR1 4

GO:0071305 BP cellular response to vitamin D 4/1105 21/162410.050409699  
0.207902972 0.16658435 PENK/SFRP1/TNC/FGF23 4

GO:0140131 BP positive regulation of lymphocyte chemotaxis 4/1105 21/16241  
0.050409699 0.207902972 0.16658435 CCL21/CCR2/CXCL13/S100A7 4

GO:1903010 BP regulation of bone development 4/1105 21/162410.050409699

0.207902972 0.16658435 FBN1/GLI3/GREM1/TMEM119 4  
 GO:1905208 BP negative regulation of cardiocyte differentiation 4/1105 21/16241  
 0.050409699 0.207902972 0.16658435 DKK1/PI16/PRICKLE1/RGS4 4  
 GO:0006029 BP proteoglycan metabolic process 11/1105 93/162410.050681874  
 0.208500307 0.167062971  
 BGN/CHST8/COL11A1/DCN/DSEL/EXTL1/IGF1/SPOCK3/SULF1/VCAN/IHH 11  
 GO:0050848 BP regulation of calcium-mediated signaling 11/1105 93/162410.050681874  
 0.208500307 0.167062971  
 CASQ2/CD22/CMKLR1/IGF1/JPH2/JPH4/MYOZ2/P2RX2/PLN/CHP2/P2RX3 11  
 GO:0072080 BP nephron tubule development 11/1105 93/162410.050681874 0.208500307  
 0.167062971  
 AGTR2/FGF2/GLI3/HEYL/IRX1/SIX2/WNT9B/WWTR1/HOXA11/HOXD11/SALL1 11  
 GO:0030317 BP flagellated sperm motility 10/1105 82/162410.051039739 0.209271453  
 0.167680859 ATP1A4/NME8/TAC4/TACR1/TACR2/AKAP4/DEFB1/LDHC/SEMG1/TEX101 10  
 GO:0045445 BP myoblast differentiation 10/1105 82/162410.051039739 0.209271453  
 0.167680859  
 BOC/CMTM5/CXCL9/GREM1/IGF1/MYOC/PRICKLE1/RANBP3L/RBM24/SMYD1 10  
 GO:0097722 BP sperm motility 10/1105 82/162410.051039739 0.209271453 0.167680859  
 ATP1A4/NME8/TAC4/TACR1/TACR2/AKAP4/DEFB1/LDHC/SEMG1/TEX101 10  
 GO:1901019 BP regulation of calcium ion transmembrane transporter activity 10/1105  
 82/162410.051039739 0.209271453 0.167680859  
 ANK2/ATP1A2/CASQ1/CASQ2/FGF14/JPH2/JPH4/PLN/STAC/TLR9 10  
 GO:0035176 BP social behavior 7/1105 50/162410.051188847 0.209358549  
 0.167750646 EN1/GRP/GRPR/NRXN2/NRXN3/SHANK1/NR2E1 7  
 GO:0043030 BP regulation of macrophage activation 7/1105 50/162410.051188847  
 0.209358549 0.167750646 BPI/FCGR2B/IL31RA/LRFN5/PTPRC/THBS1/VSIG4 7  
 GO:0051703 BP intraspecies interaction between organisms 7/1105 50/162410.051188847  
 0.209358549 0.167750646 EN1/GRP/GRPR/NRXN2/NRXN3/SHANK1/NR2E1 7  
 GO:0001709 BP cell fate determination 6/1105 40/162410.051703733 0.210587676  
 0.168735496 DSCAML1/EBF2/PRRX1/PTCH2/ATOH1/POU6F2 6  
 GO:0007618 BP mating 6/1105 40/162410.051703733 0.210587676 0.168735496  
 CNR1/TAC1/VIP/PI3/PPP1R1B/SEMG1 6  
 GO:0035136 BP forelimb morphogenesis 6/1105 40/162410.051703733 0.210587676  
 0.168735496 EN1/GDF5/RNF165/RSPO2/WNT9A/HOXA11 6  
 GO:0042596 BP fear response 6/1105 40/162410.051703733 0.210587676 0.168735496  
 ADCYAP1/APOE/GABRA5/PENK/HTR2C/NR2E1 6  
 GO:1905953 BP negative regulation of lipid localization 6/1105 40/162410.051703733  
 0.210587676 0.168735496 AGTR2/THBS1/APOA2/APOC3/CYP4F2/PCSK9 6  
 GO:0055088 BP lipid homeostasis 14/1105 128/16241 0.052856858 0.214511489  
 0.171879491  
 APOE/CYP7B1/FABP4/GPIHBP1/APOA1/APOA2/APOA4/APOA5/APOC3/G6PC/MLXIPL/MTP/PCSK9/PLA2G12B 14  
 GO:0022037 BP metencephalon development 12/1105 105/16241 0.052971454  
 0.214511489 0.171879491

AGTR2/CBLN1/CNTN1/EN1/FCGR2B/FOXP2/GLI2/PHOX2A/PTPRS/SEZ6L/LHX5/NEUROD1  
 12  
 GO:0071496 BP cellular response to external stimulus 30/1105 324/16241 0.053045624  
 0.214511489 0.171879491  
 ATP1A2/AXL/CARTPT/COL1A1/CYBB/FOLR2/KCNB1/KCNK4/MAG/MAP1LC3C/MYOC/D/P2RY1  
 2/PENK/PTPRC/SFRP1/SFRP2/TLR7/TLR8/TNC/VCAM1/WNT9B/DAPL1/FGF23/FOLR1/FOXA2/KRT  
 20/LCN2/P2RX3/PCK1/PCSK9 30  
 GO:0001505 BP regulation of neurotransmitter levels 31/1105 337/16241 0.053599907  
 0.214511489 0.171879491  
 AGTR2/ATP1A2/BCHE/CAMK2A/CHAT/CHRM2/CHRNA3/CHRNA6/CNR1/CYP1B1/DPYS/GRIK  
 5/HTR2A/ITGB2/KLRC4-KLRK1/MOXD1/NLGN1/NRXN2/PRIMA1/PRKCB/PTGIS/RGS4/SLC18A3/SL  
 C6A2/SYT11/SYT4/TACR2/AGXT/AGXT2/DDC/PAH31  
 GO:0060393 BP regulation of pathway-restricted SMAD protein phosphorylation 8/1105  
 61/162410.053636727 0.214511489 0.171879491  
 DKK1/EMILIN1/GDF10/GDF5/GDF6/GREM1/TGFB3/BMP7 8  
 GO:0060828 BP regulation of canonical Wnt signaling pathway 26/1105 274/16241  
 0.053653255 0.214511489 0.171879491  
 ADGRA2/APOE/BICC1/CDH2/COL1A1/DACT1/DACT3/DKK1/FGF10/FRZB/GLI3/GREM1/IGFBP  
 4/PRICKLE1/ROR2/RSPO1/RSPO2/RSPO3/SFRP1/SFRP2/SFRP4/SOX10/TBX18/TNN/WWTR1/FOLR  
 1 26  
 GO:2000241 BP regulation of reproductive process 15/1105 140/16241 0.0536855  
 0.214511489 0.171879491  
 AR/CNR1/DAZL/IGF1/NPPC/NRK/PDE3A/RETN/SERPINF1/SFRP1/SULF1/VIP/ZFPM2/BMP7/O  
 VOL1 15  
 GO:0002834 BP regulation of response to tumor cell 3/1105 13/162410.053758885  
 0.214511489 0.171879491 CRTAM/IL12B/HRG 3  
 GO:0002837 BP regulation of immune response to tumor cell 3/1105 13/16241  
 0.053758885 0.214511489 0.171879491 CRTAM/IL12B/HRG 3  
 GO:0010454 BP negative regulation of cell fate commitment 3/1105 13/162410.053758885  
 0.214511489 0.171879491 DKK1/SFRP2/NKX6-2 3  
 GO:0010752 BP regulation of cGMP-mediated signaling 3/1105 13/162410.053758885  
 0.214511489 0.171879491 NPPC/THBS1/PDZD3 3  
 GO:0021520 BP spinal cord motor neuron cell fate specification 3/1105 13/16241  
 0.053758885 0.214511489 0.171879491 GLI2/GLI3/NKX6-2 3  
 GO:0021978 BP telencephalon regionalization 3/1105 13/162410.053758885  
 0.214511489 0.171879491 EMX2/EMX1/SIX3 3  
 GO:0030007 BP cellular potassium ion homeostasis 3/1105 13/162410.053758885  
 0.214511489 0.171879491 ATP1A2/ATP1A4/KCNMA1 3  
 GO:0031953 BP negative regulation of protein autophosphorylation 3/1105 13/16241  
 0.053758885 0.214511489 0.171879491 ADIPOQ/GFRA2/PTPRC 3  
 GO:0032096 BP negative regulation of response to food 3/1105 13/162410.053758885  
 0.214511489 0.171879491 CARTPT/SPX/NPFF 3  
 GO:0032099 BP negative regulation of appetite 3/1105 13/162410.053758885  
 0.214511489 0.171879491 CARTPT/SPX/NPFF 3

GO:0032823 BP regulation of natural killer cell differentiation 3/1105 13/16241  
0.053758885 0.214511489 0.171879491 AXL/PGLYRP3/PGLYRP4 3

GO:0035641 BP locomotory exploration behavior 3/1105 13/16241 0.053758885  
0.214511489 0.171879491 APOE/PENK/TNR 3

GO:0048681 BP negative regulation of axon regeneration 3/1105 13/16241 0.053758885  
0.214511489 0.171879491 PTPRS/RGMA/TNR 3

GO:0061478 BP response to platelet aggregation inhibitor 3/1105 13/16241 0.053758885  
0.214511489 0.171879491 ADCY2/ADCY5/REG1A 3

GO:0090179 BP planar cell polarity pathway involved in neural tube closure 3/1105  
13/16241 0.053758885 0.214511489 0.171879491 SFRP1/SFRP2/GRHL3 3

GO:1900452 BP regulation of long-term synaptic depression 3/1105 13/16241 0.053758885  
0.214511489 0.171879491 CBLN1/KCNB1/SORCS3 3

GO:1902430 BP negative regulation of amyloid-beta formation 3/1105 13/16241  
0.053758885 0.214511489 0.171879491 APOE/IGF1/SPON1 3

GO:2000052 BP positive regulation of non-canonical Wnt signaling pathway 3/1105  
13/16241 0.053758885 0.214511489 0.171879491 DKK1/RSP03/SFRP1 3

GO:0099175 BP regulation of postsynapse organization 11/1105 94/16241 0.054033778  
0.215433375 0.172618162  
APOE/CBLN1/CDH2/EPHA7/FCGR2B/GAP43/LRRTM1/NLGN1/NRP2/PTPRS/RELN 11

GO:0007369 BP gastrulation 18/1105 176/16241 0.054394334 0.216359734  
0.173360416  
ADIPOQ/COL11A1/COL5A1/COL6A1/COL8A1/DKK1/FGFR1/FN1/ITGB2/MMP2/SFRP1/SFRP2  
/SIX2/TENM4/APOA1/BMP7/FOXA2/HOXA11 18

GO:0051224 BP negative regulation of protein transport 18/1105 176/16241  
0.054394334 0.216359734 0.173360416  
ADIPOQ/APOE/CD22/FCGR2B/FN1/KCNB1/LRRC32/SFRP1/SSC5D/SYT11/SYT4/TLR8/ADTRP/  
APOA1/APOA2/CARD18/IL36RN/NPFF 18

GO:0045619 BP regulation of lymphocyte differentiation 17/1105 164/16241  
0.054398264 0.216359734 0.173360416  
AXL/CCL19/CCR2/CCR1/FGL2/GLI2/GLI3/HLA-DOA/IL12B/LILRB4/PTPRC/SFRP1/TLR9/FOXN1/I  
HH/PGLYRP3/PGLYRP4 17

GO:0032970 BP regulation of actin filament-based process 33/1105 363/16241  
0.054484856 0.216528814 0.173495893  
ACTN2/ADD2/ANK2/ATP1A2/CCL21/CCR7/CSF1R/CTNNA3/CXCL12/ELN/EPHA3/EPHA5/FLNA  
/FMN2/FRMD6/JAM3/LMOD1/MAGEL2/MYOC/PDGFRB/PLN/RGS4/SFRP1/SHANK1/SLIT2/SYNPO  
2/TAC1/TGFB3/TMEFF2/APOA1/GRHL3/HRG/RHOV 33

GO:0003208 BP cardiac ventricle morphogenesis 9/1105 72/16241 0.054630419  
0.21668799 0.173623435  
COL11A1/HAND2/HEG1/HEYL/MYL3/NPY5R/SFRP2/ZFPM2/FOXH1 9

GO:0031100 BP animal organ regeneration 9/1105 72/16241 0.054630419 0.21668799  
0.173623435 AXL/CXCL12/FLT3/GLI3/APOA1/APOA2/IHH/REG1A/UGT1A1 9

GO:0055006 BP cardiac cell development 10/1105 83/16241 0.054657252 0.21668799  
0.173623435 ACTN2/AGTR2/BVES/IGF1/MYH11/PDGFRB/PI16/RGS4/SGCD/SLC8A1 10

GO:0046425 BP regulation of JAK-STAT cascade 14/1105 129/16241 0.05575373

0.22035315 0.176560181  
 CSF1R/CYP1B1/FLT3/GHR/IGF1/IL10RA/IL12B/IL21/IL31RA/PECAM1/PTPRC/EPO/F2/NEURO  
 D1 14  
 GO:0006584 BP catecholamine metabolic process 7/1105 51/162410.056003972  
 0.22035315 0.176560181 AGTR2/HAND2/ITGB2/MOXD1/DDC/PAH/PNMT 7  
 GO:0009712 BP catechol-containing compound metabolic process 7/1105 51/16241  
 0.056003972 0.22035315 0.176560181 AGTR2/HAND2/ITGB2/MOXD1/DDC/PAH/PNMT  
 7  
 GO:0043551 BP regulation of phosphatidylinositol 3-kinase activity 7/1105 51/16241  
 0.056003972 0.22035315 0.176560181  
 CCL19/CCL21/CCR7/FGF2/FLT3/P2RY12/PDGFRB 7  
 GO:0050704 BP regulation of interleukin-1 secretion 7/1105 51/162410.056003972  
 0.22035315 0.176560181 CCL19/CCR7/TLR8/APOA1/CARD18/ORM1/ORM2 7  
 GO:0007202 BP activation of phospholipase C activity 5/1105 31/162410.056173536  
 0.22035315 0.176560181 ADCYAP1R1/EDNRA/HTR2A/NTRK2/P2RY12 5  
 GO:0010543 BP regulation of platelet activation 5/1105 31/162410.056173536  
 0.22035315 0.176560181 APOE/SELP/F2/FGG/HRG 5  
 GO:0010574 BP regulation of vascular endothelial growth factor production 5/1105  
 31/162410.056173536 0.22035315 0.176560181 CCR2/CYP1B1/SULF1/CXCL17/NOX1  
 5  
 GO:0035587 BP purinergic receptor signaling pathway 5/1105 31/162410.056173536  
 0.22035315 0.176560181 ADCY5/P2RX2/P2RY10/P2RY12/P2RX3 5  
 GO:0045880 BP positive regulation of smoothened signaling pathway 5/1105 31/16241  
 0.056173536 0.22035315 0.176560181 EVC/PRRX1/SFRP1/WNT9A/IHH 5  
 GO:0051482 BP positive regulation of cytosolic calcium ion concentration involved in  
 phospholipase C-activating G protein-coupled signaling pathway 5/1105 31/162410.056173536  
 0.22035315 0.176560181 AGTR1/GPR174/P2RY10/HTR2C/KISS1 5  
 GO:0001676 BP long-chain fatty acid metabolic process 12/1105 106/16241 0.056209792  
 0.22035315 0.176560181  
 CYP1B1/PLP1/PTGDS/PTGIS/QKI/ADTRP/CYP2B6/CYP2C19/CYP2J2/CYP3A4/CYP4F2/GSTA1  
 12  
 GO:0008543 BP fibroblast growth factor receptor signaling pathway 12/1105 106/16241  
 0.056209792 0.22035315 0.176560181  
 FGF10/FGF2/FGF5/FGF7/FGFR1/FLRT2/SMOC2/SULF1/THBS1/FGF23/FGFBP1/TRIM71 12  
 GO:0021510 BP spinal cord development 12/1105 106/16241 0.056209792  
 0.22035315 0.176560181  
 GLI2/GLI3/NEFL/PHOX2A/PTPRS/RELN/VIT/EVX1/LHX5/NKX6-2/NPFF/RFX4 12  
 GO:0042572 BP retinol metabolic process 6/1105 41/162410.057232468 0.224183318  
 0.179629141 ADH1B/CYP1B1/ADH7/AKR1B10/CYP3A4/TTR 6  
 GO:0051153 BP regulation of striated muscle cell differentiation 11/1105 95/16241  
 0.057530583 0.224992215 0.180277278  
 CXCL9/DKK1/EHD2/GREM1/IGF1/MYOCD/PI16/RBM24/RGS4/SMYD1/TMEM119 11  
 GO:0061326 BP renal tubule development 11/1105 95/162410.057530583 0.224992215  
 0.180277278

AGTR2/FGF2/GLI3/HEYL/IRX1/SIX2/WNT9B/WWTR1/HOXA11/HOXD11/SALL1 11  
 GO:0009404 BP toxin metabolic process 4/1105 22/162410.058416287 0.227101357  
 0.18196725 CYP1B1/FMO1/FMO2/DDC 4  
 GO:0010667 BP negative regulation of cardiac muscle cell apoptotic process 4/1105  
 22/162410.058416287 0.227101357 0.18196725 HAND2/HSPB6/MYOCD/SFRP2 4  
 GO:0035812 BP renal sodium excretion 4/1105 22/162410.058416287 0.227101357  
 0.18196725 AGTR1/AGTR2/SPX/TAC1 4  
 GO:0042104 BP positive regulation of activated T cell proliferation 4/1105 22/16241  
 0.058416287 0.227101357 0.18196725 IGF1/IL12B/EPO/HHLA2 4  
 GO:0071379 BP cellular response to prostaglandin stimulus 4/1105 22/162410.058416287  
 0.227101357 0.18196725 PTGDR/PTGFR/SFRP1/TNC 4  
 GO:0086013 BP membrane repolarization during cardiac muscle cell action potential 4/1105  
 22/162410.058416287 0.227101357 0.18196725 FLNA/KCNA5/KCNE4/KCNJ5 4  
 GO:1903020 BP positive regulation of glycoprotein metabolic process 4/1105 22/16241  
 0.058416287 0.227101357 0.18196725 CCL19/CCL21/CCR7/IGF1 4  
 GO:0009798 BP axis specification 10/1105 84/162410.058439763 0.227101357  
 0.18196725 FGF10/RIPPLY2/SFRP1/SIX2/TIFAB/CDX1/CDX2/FOXA2/SIX3/TDRD5 10  
 GO:0042552 BP myelination 14/1105 130/16241 0.058757112 0.228154099  
 0.18281077  
 ANK2/DHH/EGR2/JAM3/MAG/MYOC/NFASC/NTRK2/PLP1/QKI/SOX10/TENM4/GJC3/NKX6-2  
 14  
 GO:1905330 BP regulation of morphogenesis of an epithelium 18/1105 178/16241  
 0.059447598 0.230652925 0.184812979  
 AGTR2/AR/DACT1/DKK1/FGF10/FGF7/FGFR1/PRICKLE1/PRICKLE2/ROR2/RSPO3/SFRP1/SFRP  
 2/SIX2/SULF1/WNT9B/BMP7/GRHL3 18  
 GO:0045598 BP regulation of fat cell differentiation 13/1105 119/16241 0.060978866  
 0.235491017 0.188689549  
 ADIPOQ/CMKLR1/FRZB/HTR2A/LGALS12/MEDAG/RUNX1T1/SFRP1/SFRP2/TGFB1I1/WWTR1  
 /ZFPM2/HTR2C 13  
 GO:0090276 BP regulation of peptide hormone secretion 20/1105 203/16241  
 0.060989004 0.235491017 0.188689549  
 ADCY5/ADCYAP1/BLK/CARTPT/CNR1/EPHA5/GRP/KCNA5/KCNB1/SFRP1/FGA/FGB/FGG/FOX  
 A2/HTR2C/KISS1/NEUROD1/NPFF/RFX6/TFR2 20  
 GO:0034381 BP plasma lipoprotein particle clearance 7/1105 52/162410.061091013  
 0.235491017 0.188689549 ADIPOQ/APOE/GPIHBP1/APOA1/APOA2/APOC3/PCSK9 7  
 GO:0050702 BP interleukin-1 beta secretion 7/1105 52/162410.061091013 0.235491017  
 0.188689549 CCL19/CCR7/TLR8/APOA1/CARD18/ORM1/ORM2 7  
 GO:0050994 BP regulation of lipid catabolic process 7/1105 52/162410.061091013  
 0.235491017 0.188689549 CNR1/LGALS12/APOA2/APOA4/APOA5/APOC3/FABP1 7  
 GO:0051353 BP positive regulation of oxidoreductase activity 7/1105 52/16241  
 0.061091013 0.235491017 0.188689549 AGTR1/AGTR2/APOE/FCER2/NPR3/FGF23/TERT  
 7  
 GO:2000242 BP negative regulation of reproductive process 7/1105 52/162410.061091013  
 0.235491017 0.188689549 IGF1/NPPC/SERPINF1/SULF1/ZFPM2/BMP7/OVOL1 7

GO:0021549 BP cerebellum development 11/1105 96/162410.061173969 0.235491017  
0.188689549  
AGTR2/CBLN1/CNTN1/EN1/FCGR2B/FOXP2/GLI2/PTPRS/SEZ6L/LHX5/NEUROD1 11

GO:0042136 BP neurotransmitter biosynthetic process 11/1105 96/162410.061173969  
0.235491017 0.188689549  
AGTR2/CHAT/CYP1B1/ITGB2/KLRC4-KLRK1/MOXD1/PTGIS/AGXT/AGXT2/DDC/PAH 11

GO:0042472 BP inner ear morphogenesis 11/1105 96/162410.061173969 0.235491017  
0.188689549  
COL11A1/FGF10/FGFR1/FRZB/GLI2/PRRX1/ROR2/TIFAB/ATOH1/GRHL3/USH1G11

GO:0072593 BP reactive oxygen species metabolic process 24/1105 253/16241  
0.061956237 0.238244922 0.190896144  
AGTR1/AGTR2/CRYAB/CYBB/CYP1B1/FBLN5/ITGB2/KLRC4-KLRK1/MPO/PDGFRB/PTGIS/SOD  
3/THBS1/TPO/AGXT2/APOA4/BMP7/DUOX2/DUOX2/F2/MMP3/NOX1/SLC30A10/XDH 24

GO:0046328 BP regulation of JNK cascade 18/1105 179/16241 0.062092233  
0.238244922 0.190896144  
CCL19/CCL21/CCR7/DACT1/DKK1/FCGR2B/NRK/ROR2/SFRP1/SFRP2/TLR9/ZEB2/AMBP/IL36  
G/IL36RN/IL37/KLHL31/NOX1 18

GO:0014031 BP mesenchymal cell development 10/1105 85/162410.062389063  
0.238244922 0.190896144  
ANXA6/EDNRA/FN1/HAND2/HEYL/NRP2/SOX10/ZEB2/BMP7/FOLR1 10

GO:0048864 BP stem cell development 10/1105 85/162410.062389063 0.238244922  
0.190896144 ANXA6/EDNRA/FN1/HAND2/NRP2/PTPRC/SOX10/ZEB2/BMP7/FOLR1 10

GO:0050772 BP positive regulation of axonogenesis 10/1105 85/162410.062389063  
0.238244922 0.190896144  
CHODL/CXCL12/FN1/NEFL/NGF/NGFR/NTRK2/PLXNA4/SLIT2/ZEB2 10

GO:1903305 BP regulation of regulated secretory pathway 16/1105 155/16241  
0.062508942 0.238244922 0.190896144  
CACNA1G/CAMK2A/CCR2/CHRM2/CHRNA6/CNR1/FCGR2B/GRIK5/HTR2A/ITGB2/KCNB1/NL  
GN1/PRKCB/SYT11/SYT4/SYT6 16

GO:0048511 BP rhythmic process 27/1105 291/16241 0.062510687 0.238244922  
0.190896144  
ADAMTS1/ADIPOQ/AXL/CARTPT/EGR2/ENOX1/HAS1/HTR7/KCNA2/MAGEL2/NGFR/NLGN1/  
NPY5R/NTRK2/PTGDS/PTPRN/RETN/RORB/SERPINE1/SERPINF1/SLIT2/SLIT3/TGFB3/CRX/DDC/KIS  
S1/SIX3 27

GO:0007601 BP visual perception 21/1105 216/16241 0.062672326 0.238244922  
0.190896144  
CNGA3/COL11A1/COL1A1/CYP1B1/EFEMP1/HMCN1/KERA/LUM/RORB/TIMP3/ADGRV1/CN  
GB3/CRX/CRYBA2/KRT12/NR2E1/POU6F2/REEP6/RGR/SIX3/SLC45A221

GO:0071230 BP cellular response to amino acid stimulus 8/1105 63/162410.06275028  
0.238244922 0.190896144  
COL1A1/COL1A2/COL3A1/COL6A1/CPEB1/CYBB/MMP2/NTRK2 8

GO:0072678 BP T cell migration 8/1105 63/162410.06275028 0.238244922  
0.190896144 CCL21/CCR2/CXCL12/CXCL13/C10orf99/CCL20/DEFA1/S100A7 8

GO:0003176 BP aortic valve development 5/1105 32/162410.0630062 0.238244922

0.190896144 ELN/EMILIN1/HEYL/SLIT2/SLIT3 5  
 GO:0007616 BP long-term memory 5/1105 32/162410.0630062 0.238244922  
 0.190896144 APOE/GRIA1/RELN/SHANK1/TAC1 5  
 GO:0032228 BP regulation of synaptic transmission, GABAergic 5/1105 32/16241  
 0.0630062 0.238244922 0.190896144 CNR1/NLGN1/NPY5R/PHF24/TAC15  
 GO:0032689 BP negative regulation of interferon-gamma production 5/1105 32/16241  
 0.0630062 0.238244922 0.190896144 AXL/IL36RN/PGLYRP3/PGLYRP4/SCGB1A1 5  
 GO:0048333 BP mesodermal cell differentiation 5/1105 32/162410.0630062  
 0.238244922 0.190896144 DKK1/FGFR1/SFRP2/SIX2/HOXA11 5  
 GO:0060325 BP face morphogenesis 5/1105 32/162410.0630062 0.238244922  
 0.190896144 COL1A1/CRISPLD2/DKK1/MMP2/TGFB3 5  
 GO:0070207 BP protein homotrimerization 5/1105 32/162410.0630062 0.238244922  
 0.190896144 EMILIN1/TCL1A/LCN2/OTC/P2RX3 5  
 GO:0140115 BP export across plasma membrane 5/1105 32/162410.0630062  
 0.238244922 0.190896144 ATP1A2/ATP1A4/KCNA5/KCNE4/SLC8A1 5  
 GO:1990774 BP tumor necrosis factor secretion 5/1105 32/162410.0630062  
 0.238244922 0.190896144 AKAP12/C1QTNF4/SYT11/ORM1/ORM2 5  
 GO:0072078 BP nephron tubule morphogenesis 9/1105 74/162410.063018699  
 0.238244922 0.190896144 AGTR2/FGF2/GLI3/IRX1/SIX2/WNT9B/HOXA11/HOXD11/SALL1  
 9  
 GO:0014003 BP oligodendrocyte development 6/1105 42/162410.063101923  
 0.238244922 0.190896144 MAG/PLP1/PRDM8/SOX10/TENM4/NKX6-2 6  
 GO:0021795 BP cerebral cortex cell migration 6/1105 42/162410.063101923 0.238244922  
 0.190896144 GLI3/NRP2/P2RY12/RELN/SLIT2/NR2E1 6  
 GO:0031279 BP regulation of cyclase activity 6/1105 42/162410.063101923 0.238244922  
 0.190896144 CCR2/NPR3/TIMP2/ADGRV1/GUCA2A/PDZD3 6  
 GO:0044331 BP cell-cell adhesion mediated by cadherin 6/1105 42/162410.063101923  
 0.238244922 0.190896144 CDH10/CDH11/CDH19/CDH2/CDH17/FOXA2 6  
 GO:0048599 BP oocyte development 6/1105 42/162410.063101923 0.238244922  
 0.190896144 DAZL/IGF1/NPPC/PDE3A/TDRD5/YBX2 6  
 GO:0031349 BP positive regulation of defense response 42/1105 485/16241 0.063513476  
 0.23961459 0.191993604  
 AGTR1/CCL14/CCR2/CCR7/CLEC10A/CLEC4C/CLEC6A/CNR1/COLEC12/CRTAM/FABP4/FCN1/I  
 L12B/IL21/ITGB2/KLRC4-KLRK1/LILRA4/NPY5R/PENK/PTGER3/PTPRS/SERPINE1/SUCNR1/TAC1/TL  
 R7/TLR8/TLR9/CREB3L3/DMBT1/FGA/FGB/FGG/IL17A/IL17F/MUC15/MUC17/MUC21/MUC4/PGL  
 YRP3/PGLYRP4/REG3G/S100A14 42  
 GO:0043434 BP response to peptide hormone 37/1105 420/16241 0.063864626  
 0.240754447 0.192906925  
 ACTN2/ADCY2/ADCY5/ADIPOQ/AGTR1/AGTR2/CAMK2A/CDO1/COL1A1/CPEB1/CXCL12/CYB  
 B/EGR2/FBN1/GHR/GLP2R/IGFBP5/NEFL/PLN/PRKCB/PTPRN/RAB31/RETN/SORBS1/SPARC/ABCC  
 2/APOBEC1/ATP6V1C2/BMP7/OTC/PCK1/PCSK9/REG1A/REG1B/REG3A/REG3G/SLC30A10 37  
 GO:1904950 BP negative regulation of establishment of protein localization 18/1105  
 180/16241 0.064816633 0.241657706 0.193630671  
 ADIPOQ/APOE/CD22/FCGR2B/FN1/KCNB1/LRR32/SFRP1/SSC5D/SYT11/SYT4/TLR8/ADTRP/

APOA1/APOA2/CARD18/IL36RN/NPFF 18

GO:0007044 BP cell-substrate junction assembly 11/1105 97/162410.06496542  
0.241657706 0.193630671  
ACTN2/EPHA3/FERMT2/FN1/MYOC/SFRP1/SORBS1/THBS1/THY1/TNS1/HRG 11

GO:0001771 BP immunological synapse formation 3/1105 14/162410.065067272  
0.241657706 0.193630671 CCL19/CCL21/CCR7 3

GO:0002523 BP leukocyte migration involved in inflammatory response 3/1105  
14/162410.065067272 0.241657706 0.193630671 ELANE/ITGB2/JAM3 3

GO:0006957 BP complement activation, alternative pathway 3/1105 14/162410.065067272  
0.241657706 0.193630671 C7/CR1/VSIG4 3

GO:0007638 BP mechanosensory behavior 3/1105 14/162410.065067272 0.241657706  
0.193630671 FOXP2/NRXN2/TIFAB 3

GO:0010759 BP positive regulation of macrophage chemotaxis 3/1105 14/16241  
0.065067272 0.241657706 0.193630671 CMKLR1/THBS1/CXCL17 3

GO:0030207 BP chondroitin sulfate catabolic process 3/1105 14/162410.065067272  
0.241657706 0.193630671 BGN/DCN/VCAN 3

GO:0036376 BP sodium ion export across plasma membrane 3/1105 14/162410.065067272  
0.241657706 0.193630671 ATP1A2/ATP1A4/SLC8A13

GO:0051712 BP positive regulation of killing of cells of other organism 3/1105 14/16241  
0.065067272 0.241657706 0.193630671 FCER2/PGLYRP3/PGLYRP4 3

GO:0071361 BP cellular response to ethanol 3/1105 14/162410.065067272 0.241657706  
0.193630671 CYBB/KCNMB1/UGT1A1 3

GO:0072216 BP positive regulation of metanephros development 3/1105 14/16241  
0.065067272 0.241657706 0.193630671 ADIPOQ/AGTR2/PDGFRB 3

GO:0090178 BP regulation of establishment of planar polarity involved in neural tube closure  
3/1105 14/162410.065067272 0.241657706 0.193630671 SFRP1/SFRP2/GRHL3 3

GO:0090192 BP regulation of glomerulus development 3/1105 14/162410.065067272  
0.241657706 0.193630671 ADIPOQ/AGTR2/BMP7 3

GO:0098543 BP detection of other organism 3/1105 14/162410.065067272 0.241657706  
0.193630671 SSC5D/PGLYRP3/PGLYRP4 3

GO:1902043 BP positive regulation of extrinsic apoptotic signaling pathway via death domain  
receptors 3/1105 14/162410.065067272 0.241657706 0.193630671 SFRP1/THBS1/TIMP3  
3

GO:1904889 BP regulation of excitatory synapse assembly 3/1105 14/162410.065067272  
0.241657706 0.193630671 CBLN1/LRRTM1/PTPRS 3

GO:1904996 BP positive regulation of leukocyte adhesion to vascular endothelial cell 3/1105  
14/162410.065067272 0.241657706 0.193630671 CCR2/ELANE/ITGB2 3

GO:0007272 BP ensheathment of neurons 14/1105 132/16241 0.065088181  
0.241657706 0.193630671  
ANK2/DHH/EGR2/JAM3/MAG/MYOC/NFASC/NTRK2/PLP1/QKI/SOX10/TENM4/GJC3/NKX6-2  
14

GO:0008366 BP axon ensheathment 14/1105 132/16241 0.065088181 0.241657706  
0.193630671  
ANK2/DHH/EGR2/JAM3/MAG/MYOC/NFASC/NTRK2/PLP1/QKI/SOX10/TENM4/GJC3/NKX6-2

GO:0009595 BP detection of biotic stimulus 4/1105 23/162410.067057741 0.246917261  
0.197844942 CRTAM/SSC5D/PGLYRP3/PGLYRP4 4

GO:0030539 BP male genitalia development 4/1105 23/162410.067057741 0.246917261  
0.197844942 AR/FGF10/ROR2/WNT9B 4

GO:0034695 BP response to prostaglandin E 4/1105 23/162410.067057741 0.246917261  
0.197844942 CCL19/CCL21/CCR7/SFRP1 4

GO:0036152 BP phosphatidylethanolamine acyl-chain remodeling 4/1105 23/16241  
0.067057741 0.246917261 0.197844942 PLA2G2D/PLA2G2F/PLA2G4E/PLA2G4F 4

GO:0044062 BP regulation of excretion 4/1105 23/162410.067057741 0.246917261  
0.197844942 AGTR1/AGTR2/SPX/TAC1 4

GO:0045109 BP intermediate filament organization 4/1105 23/162410.067057741  
0.246917261 0.197844942 DES/NEFL/VIM/KRT20 4

GO:0048261 BP negative regulation of receptor-mediated endocytosis 4/1105 23/16241  
0.067057741 0.246917261 0.197844942 LRRTM1/SYT11/APOC3/PCSK9 4

GO:0060445 BP branching involved in salivary gland morphogenesis 4/1105 23/16241  
0.067057741 0.246917261 0.197844942 FGF10/FGF7/FGFR1/BMP7 4

GO:0090023 BP positive regulation of neutrophil chemotaxis 4/1105 23/162410.067057741  
0.246917261 0.197844942 CCL19/CCL21/CCR7/THBS4 4

GO:1900120 BP regulation of receptor binding 4/1105 23/162410.067057741  
0.246917261 0.197844942 ADIPOQ/CRTAC1/GREM2/PCSK9 4

GO:1901380 BP negative regulation of potassium ion transmembrane transport 4/1105  
23/162410.067057741 0.246917261 0.197844942 ACTN2/CASQ2/KCNE4/RGS4 4

GO:0007422 BP peripheral nervous system development 9/1105 75/162410.067502963  
0.248158742 0.198839691  
EGR2/HAND2/LAMA2/MYOC/NFASC/NGF/NTRK2/PLXNA4/SOX10 9

GO:0032410 BP negative regulation of transporter activity 9/1105 75/162410.067502963  
0.248158742 0.198839691 ACTN2/ATP1A2/CASQ2/KCNE4/PLN/TLR9/APOA2/EPO/PCSK9  
9

GO:0051187 BP cofactor catabolic process 8/1105 64/162410.067647507 0.248158742  
0.198839691 GGT5/MPO/TPO/AMBP/APOA4/CYP4F2/DUOX2/UGT1A1 8

GO:0060389 BP pathway-restricted SMAD protein phosphorylation 8/1105 64/16241  
0.067647507 0.248158742 0.198839691  
DKK1/EMILIN1/GDF10/GDF5/GDF6/GREM1/TGFB3/BMP7 8

GO:0072091 BP regulation of stem cell proliferation 8/1105 64/162410.067647507  
0.248158742 0.198839691 FBLN1/GLI3/PTPRC/SOX10/NR2E1/OVOL1/SIX3/TERT 8

GO:0009582 BP detection of abiotic stimulus 14/1105 133/16241 0.068418001  
0.250610902 0.200804509  
COL11A1/CXCL12/GPR88/HTR2A/KCNA1/KCNK4/PHF24/TAC1/TACR1/ADGRV1/GNGT1/PRD  
M12/REEP6/RGR 14

GO:1904892 BP regulation of STAT cascade 14/1105 133/16241 0.068418001  
0.250610902 0.200804509  
CSF1R/CYP1B1/FLT3/GHR/IGF1/IL10RA/IL12B/IL21/IL31RA/PECAM1/PTPRC/EPO/F2/NEURO  
D1 14

GO:0032414 BP positive regulation of ion transmembrane transporter activity 11/1105  
98/162410.068906209 0.252211101 0.202086685  
ACTN2/ANK2/CASQ1/CCR2/FGF14/HTR3A/JPH2/KCNA1/LRRC38/RELN/STAC 11

GO:0003254 BP regulation of membrane depolarization 6/1105 43/162410.06931253  
0.253320795 0.202975838 CACNA1G/DCN/FHL1/MYOC/SCN2B/NPFF 6

GO:0030225 BP macrophage differentiation 6/1105 43/162410.06931253 0.253320795  
0.202975838 ADIPOQ/C1QC/CEBPE/CSF1R/IL31RA/ROR2 6

GO:0034284 BP response to monosaccharide 19/1105 194/16241 0.069681629  
0.254480417 0.203904998  
ADCY5/ADIPOQ/CMA1/COL4A3/COL6A2/EPHA5/GRIK5/KCNB1/PTPRN/SERPINF1/SLC8A1/SP  
ARC/THBS1/APOA2/FOXA2/MLXIPL/NEUROD1/PCK1/RFX6 19

GO:0010573 BP vascular endothelial growth factor production 5/1105 33/16241  
0.070285029 0.255808705 0.204969301 CCR2/CYP1B1/SULF1/CXCL17/NOX1 5

GO:0010922 BP positive regulation of phosphatase activity 5/1105 33/162410.070285029  
0.255808705 0.204969301 AGTR2/PDGFRB/PTPRC/CHP2/PPP1R14D 5

GO:0048011 BP neurotrophin TRK receptor signaling pathway 5/1105 33/16241  
0.070285029 0.255808705 0.204969301 AGTR2/NDN/NGF/NGFR/NTRK2 5

GO:0060306 BP regulation of membrane repolarization 5/1105 33/162410.070285029  
0.255808705 0.204969301 ANK2/CASQ2/FLNA/KCNA5/KCNE4 5

GO:0071383 BP cellular response to steroid hormone stimulus 23/1105 244/16241  
0.070305731 0.255808705 0.204969301  
ADCYAP1/AGTR2/AR/ATP1A2/CYP7B1/FLT3/HEYL/RORB/RXRG/SERPINF1/SFRP1/SOX10/TGF  
B11I/ABCC2/ADTRP/BMP7/DEFA1/FOXH1/NR1I2/NR2E1/PCK1/SCGB2A1/UGT1A1 23

GO:0098693 BP regulation of synaptic vesicle cycle 12/1105 110/16241 0.070478625  
0.256164099 0.205254065  
CAMK2A/CDH2/CHRM2/CHRNA6/CNR1/FGF14/GRIK5/HTR2A/NLGN1/PRKCB/SYT11/SYT4  
12

GO:0050770 BP regulation of axonogenesis 18/1105 182/16241 0.070507708  
0.256164099 0.205254065  
APOE/CDH2/CHODL/CXCL12/EPHA7/FN1/LRRC4C/MAG/NEFL/NGF/NGFR/NTRK2/PLXNA4/P  
TPRS/SLIT2/THY1/TNR/ZEB2 18

GO:0030901 BP midbrain development 10/1105 87/162410.070793851 0.256823778  
0.205782639 CMA1/DKK1/EN1/FGFR1/GNB4/PHOX2A/PLP1/SFRP1/SFRP2/WNT9B 10

GO:0060419 BP heart growth 10/1105 87/162410.070793851 0.256823778 0.205782639  
AGTR2/FGF2/FGFR1/HEG1/IGF1/KCNK2/PI16/RGS4/TENM4/ZFPM2 10

GO:0099173 BP postsynapse organization 16/1105 158/16241 0.071669692  
0.259560517 0.207975479  
APOE/CBLN1/CDH2/CNKS2/EPHA7/FCGR2B/GAP43/LRRTM1/NEFL/NLGN1/NRP2/NRXN2/P  
TPRS/RELN/SHANK1/CEL 16

GO:0050715 BP positive regulation of cytokine secretion 14/1105 134/16241  
0.071858589 0.259560517 0.207975479  
AGTR2/AKAP12/C1QTNF4/CCL19/CLEC6A/CLEC9A/CRTAM/CSF1R/FCN1/TLR8/IL17A/IL17F/O  
RM1/ORM2 14

GO:0071322 BP cellular response to carbohydrate stimulus 14/1105 134/16241

0.071858589 0.259560517 0.207975479  
 ADCY5/CMA1/COLEC12/EPHA5/GRIK5/KCNB1/PRKCB/PTPRN/SERPINF1/FOXA2/MLXIPL/NEUROD1/PCK1/RFX6 14  
 GO:0030902 BP hindbrain development 15/1105 146/16241 0.071915955 0.259560517  
 0.207975479  
 AGTR2/CBLN1/CNTN1/EGR2/EN1/FCGR2B/FLNA/FOXP2/GLI2/PHOX2A/PTPRS/SEZ6L/BMP7/LHX5/NEUROD1 15  
 GO:0048592 BP eye morphogenesis 15/1105 146/16241 0.071915955 0.259560517  
 0.207975479  
 COL5A1/COL8A1/COL8A2/EFEMP1/FBN1/GLI3/NTRK2/RORB/TENM3/THY1/WNT9A/BMP7/GNGT1/IHH/SIX3 15  
 GO:0032655 BP regulation of interleukin-12 production 7/1105 54/16241 0.07208641  
 0.259560517 0.207975479 CCL19/CCR7/CMKLR1/IL12B/THBS1/TLR8/TLR9 7  
 GO:0061005 BP cell differentiation involved in kidney development 7/1105 54/16241  
 0.07208641 0.259560517 0.207975479  
 ACTA2/ADIPOQ/GLI3/SIX2/WNT9B/WWTR1/SALL1 7  
 GO:0072577 BP endothelial cell apoptotic process 7/1105 54/16241 0.07208641  
 0.259560517 0.207975479 COL4A3/SERPINE1/THBS1/FGA/FGB/FGG/TERT 7  
 GO:0022617 BP extracellular matrix disassembly 9/1105 76/16241 0.072182343  
 0.259560517 0.207975479 A2M/CMA1/CTSG/DDR2/ELANE/MMP2/TIMP2/MMP3/PRSS1  
 9  
 GO:0072088 BP nephron epithelium morphogenesis 9/1105 76/16241 0.072182343  
 0.259560517 0.207975479 AGTR2/FGF2/GLI3/IRX1/SIX2/WNT9B/HOXA11/HOXD11/SALL1  
 9  
 GO:1904035 BP regulation of epithelial cell apoptotic process 9/1105 76/16241  
 0.072182343 0.259560517 0.207975479  
 SERPINE1/SFRP4/THBS1/FGA/FGB/FGG/NEUROD1/SERPINF1/TERT 9  
 GO:2000300 BP regulation of synaptic vesicle exocytosis 9/1105 76/16241 0.072182343  
 0.259560517 0.207975479  
 CAMK2A/CHRM2/CHRNA6/CNR1/GRIK5/HTR2A/NLGN1/PRKCB/SYT49  
 GO:0007626 BP locomotory behavior 19/1105 195/16241 0.072524767 0.260601063  
 0.208809227  
 ADCY5/ALK/APOE/ASTN1/ATP1A2/CHRNA3/CXCL12/EN1/GNAO1/GPR88/LRRTM1/NPY1R/PENK/SEZ6L/TNR/UCHL1/FOXA2/HTR2C/PPP1R1B 19  
 GO:0021872 BP forebrain generation of neurons 8/1105 65/16241 0.072773272  
 0.260921396 0.209065897 CSF1R/FGFR1/GLI3/NRP2/SLIT2/LHX5/NR2E1/SALL1 8  
 GO:0060675 BP ureteric bud morphogenesis 8/1105 65/16241 0.072773272 0.260921396  
 0.209065897 AGTR2/FGF2/GLI3/SIX2/WNT9B/HOXA11/HOXD11/SALL1 8  
 GO:1903670 BP regulation of sprouting angiogenesis 8/1105 65/16241 0.072773272  
 0.260921396 0.209065897 AGTR1/AKT3/FGF2/MEOX2/NGFR/THBS1/FGFBP1/NR2E1 8  
 GO:0030072 BP peptide hormone secretion 23/1105 245/16241 0.072838337  
 0.260963056 0.209099277  
 ADCY5/ADCYAP1/BLK/CARTPT/CNR1/EPHA5/GRP/KCNA5/KCNB1/PTPRN/SFRP1/TACR2/VIP/FGA/FGB/FGG/FOXA2/HTR2C/KISS1/NEUROD1/NPFF/RFX6/TFR2 23

GO:0032872 BP regulation of stress-activated MAPK cascade 21/1105 220/16241  
0.072996534 0.260963056 0.209099277  
CCL19/CCL21/CCR7/DACT1/DKK1/FCGR2B/GDF6/HAND2/NRK/ROR2/SFRP1/SFRP2/TLR9/ZE  
B2/AMBP/IL36G/IL36RN/IL37/KLHL31/NOX1/XDH 21

GO:0015748 BP organophosphate ester transport 11/1105 99/16241 0.072997402  
0.260963056 0.209099277  
APOE/ATP8B2/APOA1/APOA2/APOA4/APOA5/APOC3/ATP10B/G6PC/GLTPD2/MTTP 11

GO:1904019 BP epithelial cell apoptotic process 11/1105 99/16241 0.072997402  
0.260963056 0.209099277  
COL4A3/SERPINE1/SFRP4/THBS1/FGA/FGB/FGG/NEUROD1/SERPINE1/SIX3/TERT 11

GO:0051251 BP positive regulation of lymphocyte activation 24/1105 258/16241  
0.073830662 0.263749974 0.211332323  
AXL/CCL19/CCL21/CCR2/CCR7/CLECL1/FGF10/GLI2/GLI3/HLA-DPA1/HLA-DPB1/IGF1/IL12B/I  
L21/KLRK4-KLRK1/LILRB4/PTPRC/TAC1/THY1/TLR9/VCAM1/EPO/HHLA2/IHH 24

GO:0050867 BP positive regulation of cell activation 28/1105 309/16241 0.074080018  
0.264448436 0.211891973  
AXL/CCL19/CCL21/CCR2/CCR7/CLECL1/FGF10/GLI2/GLI3/HLA-DPA1/HLA-DPB1/IGF1/IL12B/I  
L21/ITGB2/KLRK4-KLRK1/LILRB4/PDGFRB/PTPRC/SELPL/TAC1/THBS1/THY1/TLR9/VCAM1/EPO/HH  
LA2/IHH 28

GO:0006942 BP regulation of striated muscle contraction 10/1105 88/16241 0.075251562  
0.268240691 0.214930556  
ANK2/ATP1A2/CASQ1/CASQ2/CTNNA3/FLNA/MYL3/PLN/SLC8A1/TNNT3 10

GO:0042475 BP odontogenesis of dentin-containing tooth 10/1105 88/16241 0.075251562  
0.268240691 0.214930556  
FGF10/GLI2/GLI3/GNAO1/HAND2/RSPO2/SERPINE1/TNC/BMP7/DLX3 10

GO:0007259 BP JAK-STAT cascade 15/1105 147/16241 0.075308195 0.268247899  
0.214936331  
CCR2/CSF1R/CYP1B1/FLT3/GHR/IGF1/IL10RA/IL12B/IL21/IL31RA/PECAM1/PTPRC/EPO/F2/N  
EUROD1 15

GO:0032309 BP icosanoid secretion 6/1105 44/16241 0.075863502 0.2687511  
0.215339525 AGTR2/PLA2G2D/CYP4F2/PLA2G12B/PLA2G2F/PLA2G4F 6

GO:0035850 BP epithelial cell differentiation involved in kidney development 6/1105  
44/16241 0.075863502 0.2687511 0.215339525  
ACTA2/ADIPOQ/SIX2/WNT9B/WWTR1/SALL1 6

GO:0050999 BP regulation of nitric-oxide synthase activity 6/1105 44/16241 0.075863502  
0.2687511 0.215339525 AGTR2/APOE/CNR1/FCER2/NPR3/TERT 6

GO:0051339 BP regulation of lyase activity 6/1105 44/16241 0.075863502 0.2687511  
0.215339525 CCR2/NPR3/TIMP2/ADGRV1/GUCA2A/PDZD3 6

GO:0055025 BP positive regulation of cardiac muscle tissue development 6/1105  
44/16241 0.075863502 0.2687511 0.215339525  
FGF2/FGFR1/GREM1/IGF1/MYOC/ZFPM2 6

GO:0002407 BP dendritic cell chemotaxis 4/1105 24/16241 0.07632077 0.2687511  
0.215339525 CCL19/CCL21/CCR2/CCR7 4

GO:0050996 BP positive regulation of lipid catabolic process 4/1105 24/16241 0.07632077

0.2687511 0.215339525 APOA2/APOA4/APOA5/FABP1 4  
 GO:0072012 BP glomerulus vasculature development 4/1105 24/162410.07632077  
 0.2687511 0.215339525 ACTA2/PDGFRB/PECAM1/BMP7 4  
 GO:0090103 BP cochlea morphogenesis 4/1105 24/162410.07632077 0.2687511  
 0.215339525 FRZB/GLI2/TIFAB/GRHL34  
 GO:1901018 BP positive regulation of potassium ion transmembrane transporter activity  
 4/1105 24/162410.07632077 0.2687511 0.215339525  
 ACTN2/ANK2/KCNA1/LRRC384  
 GO:1905809 BP negative regulation of synapse organization 4/1105 24/162410.07632077  
 0.2687511 0.215339525 APOE/DKK1/EPHA7/NLGN1 4  
 GO:0009749 BP response to glucose 18/1105 184/16241 0.076526229 0.2687511  
 0.215339525  
 ADCY5/ADIPOQ/CMA1/COL4A3/COL6A2/EPHA5/GRIK5/KCNB1/PTPRN/SERPINF1/SLC8A1/T  
 HBS1/APOA2/FOXA2/MLXIPL/NEUROD1/PCK1/RFX6 18  
 GO:0008306 BP associative learning 9/1105 77/162410.077057646 0.2687511  
 0.215339525 ATP1A2/GABRA5/MAP1A/NETO1/RELN/SHANK1/TAC1/TNR/PPP1R1B 9  
 GO:0072347 BP response to anesthetic 9/1105 77/162410.077057646 0.2687511  
 0.215339525 CNR1/GNAO1/HTR2A/HTR3A/PENK/RGS4/TAC1/NPFF/PPP1R1B 9  
 GO:0000098 BP sulfur amino acid catabolic process 3/1105 15/162410.077364425  
 0.2687511 0.215339525 CDO1/GADL1/AGXT 3  
 GO:0002227 BP innate immune response in mucosa 3/1105 15/162410.077364425  
 0.2687511 0.215339525 APOA4/DEFA1/DEFB1 3  
 GO:0030238 BP male sex determination 3/1105 15/162410.077364425 0.2687511  
 0.215339525 AR/DHH/PTGDR 3  
 GO:0032105 BP negative regulation of response to extracellular stimulus 3/1105  
 15/162410.077364425 0.2687511 0.215339525 CARTPT/SPX/NPFF 3  
 GO:0032108 BP negative regulation of response to nutrient levels 3/1105 15/16241  
 0.077364425 0.2687511 0.215339525 CARTPT/SPX/NPFF 3  
 GO:0032645 BP regulation of granulocyte macrophage colony-stimulating factor production  
 3/1105 15/162410.077364425 0.2687511 0.215339525 IL12B/TLR9/IL17F 3  
 GO:0034310 BP primary alcohol catabolic process 3/1105 15/162410.077364425  
 0.2687511 0.215339525 ADH7/AKR1B10/SULT2A1 3  
 GO:0050665 BP hydrogen peroxide biosynthetic process 3/1105 15/162410.077364425  
 0.2687511 0.215339525 CYBB/DUOX2/DUOX2 3  
 GO:0050961 BP detection of temperature stimulus involved in sensory perception 3/1105  
 15/162410.077364425 0.2687511 0.215339525 CXCL12/HTR2A/PRDM12 3  
 GO:0050965 BP detection of temperature stimulus involved in sensory perception of pain  
 3/1105 15/162410.077364425 0.2687511 0.215339525 CXCL12/HTR2A/PRDM12  
 3  
 GO:0051770 BP positive regulation of nitric-oxide synthase biosynthetic process 3/1105  
 15/162410.077364425 0.2687511 0.215339525 AKAP12/FCER2/TLR9 3  
 GO:0051883 BP killing of cells in other organism involved in symbiotic interaction 3/1105  
 15/162410.077364425 0.2687511 0.215339525 CTSG/ELANE/F2 3  
 GO:0060026 BP convergent extension 3/1105 15/162410.077364425 0.2687511

0.215339525 FRZB/SFRP1/SFRP2 3  
 GO:0060766 BP negative regulation of androgen receptor signaling pathway 3/1105  
 15/162410.077364425 0.2687511 0.215339525 HEYL/SFRP1/FOXH1 3  
 GO:0072109 BP glomerular mesangium development 3/1105 15/162410.077364425  
 0.2687511 0.215339525 ACTA2/PDGFRB/BMP7 3  
 GO:0072283 BP metanephric renal vesicle morphogenesis 3/1105 15/162410.077364425  
 0.2687511 0.215339525 SIX2/WNT9B/SALL13  
 GO:0090177 BP establishment of planar polarity involved in neural tube closure 3/1105  
 15/162410.077364425 0.2687511 0.215339525 SFRP1/SFRP2/GRHL3 3  
 GO:1902992 BP negative regulation of amyloid precursor protein catabolic process 3/1105  
 15/162410.077364425 0.2687511 0.215339525 APOE/IGF1/SPON1 3  
 GO:1903729 BP regulation of plasma membrane organization 3/1105 15/16241  
 0.077364425 0.2687511 0.215339525 AR/TMEFF2/NOX1 3  
 GO:1905564 BP positive regulation of vascular endothelial cell proliferation 3/1105  
 15/162410.077364425 0.2687511 0.215339525 AKT3/FGF2/FGFR1 3  
 GO:2001028 BP positive regulation of endothelial cell chemotaxis 3/1105 15/16241  
 0.077364425 0.2687511 0.215339525 FGF2/FGFR1/SMOC2 3  
 GO:2000377 BP regulation of reactive oxygen species metabolic process 17/1105  
 172/16241 0.077473598 0.268940151 0.215491005  
 AGTR1/AGTR2/CRYAB/CYP1B1/FBLN5/ITGB2/KLRC4-KLRK1/PDGFRB/PTGIS/THBS1/AGXT2/B  
 MP7/DUOXA2/F2/MMP3/SLC30A10/XDH 17  
 GO:0032890 BP regulation of organic acid transport 7/1105 55/162410.077995619  
 0.269075841 0.215599728 AGTR2/ATP1A2/NPY5R/RGS4/SYT4/THBS1/CYP4F2 7  
 GO:0090183 BP regulation of kidney development 7/1105 55/162410.077995619  
 0.269075841 0.215599728 ADIPOQ/AGTR2/PDGFRB/SIX2/WNT9B/WWTR1/BMP7 7  
 GO:0007435 BP salivary gland morphogenesis 5/1105 34/162410.0780057 0.269075841  
 0.215599728 FGF10/FGF7/FGFR1/TGFB3/BMP7 5  
 GO:0045923 BP positive regulation of fatty acid metabolic process 5/1105 34/16241  
 0.0780057 0.269075841 0.215599728 ADIPOQ/APOA4/APOA5/FABP1/MLXIPL 5  
 GO:0048048 BP embryonic eye morphogenesis 5/1105 34/162410.0780057  
 0.269075841 0.215599728 EFEMP1/FBN1/BMP7/IHH/SIX3 5  
 GO:0048665 BP neuron fate specification 5/1105 34/162410.0780057 0.269075841  
 0.215599728 GLI2/GLI3/ATOH1/EVX1/NKX6-2 5  
 GO:0051154 BP negative regulation of striated muscle cell differentiation 5/1105  
 34/162410.0780057 0.269075841 0.215599728 DKK1/MYOC/PI16/RGS4/TMEM119  
 5  
 GO:0060795 BP cell fate commitment involved in formation of primary germ layer 5/1105  
 34/162410.0780057 0.269075841 0.215599728 DKK1/FGFR1/SFRP2/SIX2/HOXA11 5  
 GO:0098801 BP regulation of renal system process 5/1105 34/162410.0780057  
 0.269075841 0.215599728 ADIPOQ/AGTR1/AGTR2/SPX/TAC1 5  
 GO:0072171 BP mesonephric tubule morphogenesis 8/1105 66/162410.078128099  
 0.269308929 0.215786492 AGTR2/FGF2/GLI3/SIX2/WNT9B/HOXA11/HOXA11/HOXA11/SALL1 8  
 GO:0032874 BP positive regulation of stress-activated MAPK cascade 16/1105 160/16241  
 0.078248918 0.269536245 0.215968631

CCL19/CCL21/CCR7/DKK1/FCGR2B/GDF6/HAND2/NRK/ROR2/TLR9/ZEB2/IL36G/IL36RN/IL37/NOX1/XDH 16

GO:0070302 BP regulation of stress-activated protein kinase signaling cascade 21/1105  
222/16241 0.078568102 0.270446053 0.216697624

CCL19/CCL21/CCR7/DACT1/DKK1/FCGR2B/GDF6/HAND2/NRK/ROR2/SFRP1/SFRP2/TLR9/ZEB2/AMBP/IL36G/IL36RN/IL37/KLHL31/NOX1/XDH 21

GO:0010977 BP negative regulation of neuron projection development 15/1105  
148/16241 0.078803582 0.271066663 0.217194894

APOE/DKK1/DPYSL3/EPHA7/MAG/NGFR/NLGN1/PTPRS/RGMA/SLIT2/SPOCK1/STMN2/THY1/TNR/VIM 15

GO:0071346 BP cellular response to interferon-gamma 17/1105 173/16241 0.080751851  
0.277573892 0.222408877

CAMK2A/CCL13/CCL14/CCL19/CCL21/HLA-DPA1/HLA-DPB1/HLA-DQA1/HLA-DQA2/HLA-DQB2/IL12B/MRC1/NCAM1/VCAM1/VIM/CCL15/CCL20 17

GO:0070304 BP positive regulation of stress-activated protein kinase signaling cascade  
16/1105 161/16241 0.08168204 0.280574953 0.224813507

CCL19/CCL21/CCR7/DKK1/FCGR2B/GDF6/HAND2/NRK/ROR2/TLR9/ZEB2/IL36G/IL36RN/IL37/NOX1/XDH 16

GO:0032651 BP regulation of interleukin-1 beta production 9/1105 78/16241 0.082129306  
0.281520691 0.225571289 CCL19/CCR7/IGF1/S1PR3/TLR8/APOA1/CARD18/ORM1/ORM2 9

GO:0042509 BP regulation of tyrosine phosphorylation of STAT protein 9/1105 78/16241  
0.082129306 0.281520691 0.225571289

CSF1R/FLT3/GHR/IGF1/IL12B/IL21/IL31RA/PECAM1/EPO 9

GO:0061333 BP renal tubule morphogenesis 9/1105 78/16241 0.082129306 0.281520691  
0.225571289 AGTR2/FGF2/GLI3/IRX1/SIX2/WNT9B/HOXA11/HOXD11/SALL1 9

GO:0014009 BP glial cell proliferation 6/1105 45/16241 0.082752858 0.283460279  
0.227125404 ADCYAP1/CSF1R/PENK/SOX10/ASCL2/TERT 6

GO:0015893 BP drug transport 20/1105 211/16241 0.08309321 0.284427767  
0.227900613

ATP1A2/CHRNA3/CHRNA6/CNR1/CXCL12/FOLR2/HTR2A/KCNA2/NGB/RETN/RGS4/SLC6A17/SLC6A2/SYT11/SYT4/SYT6/TACR2/ABCC2/FOLR1/NR1I2 20

GO:0032413 BP negative regulation of ion transmembrane transporter activity 8/1105  
67/16241 0.083711989 0.286147035 0.229278194

ACTN2/ATP1A2/CASQ2/KCNE4/PLN/TLR9/EPO/PCSK9 8

GO:1904427 BP positive regulation of calcium ion transmembrane transport 8/1105  
67/16241 0.083711989 0.286147035 0.229278194

ANK2/CASQ1/CXCL9/FGF14/JPH2/STAC/THY1/F2 8

GO:0030177 BP positive regulation of Wnt signaling pathway 17/1105 174/16241  
0.084119593 0.286545114 0.229597158

ADGRA2/COL1A1/DACT1/DKK1/FGF10/ROR2/RSPO1/RSPO2/RSPO3/SFRP1/SFRP2/SFRP4/SU  
LF1/ZEB2/ATP6V1C2/SALL1/TERT 17

GO:0030858 BP positive regulation of epithelial cell differentiation 7/1105 56/16241  
0.084178461 0.286545114 0.229597158

ADIPOQ/PTCH2/SERPINE1/SFRP4/ZEB2/ATOH1/FOXN1 7  
 GO:0032615 BP interleukin-12 production 7/1105 56/162410.084178461 0.286545114  
 0.229597158 CCL19/CCR7/CMKLR1/IL12B/THBS1/TLR8/TLR9 7  
 GO:0045669 BP positive regulation of osteoblast differentiation 7/1105 56/16241  
 0.084178461 0.286545114 0.229597158  
 DDR2/GLI3/IGF1/NPPC/SFRP2/TMEM119/BMP7 7  
 GO:0046847 BP filopodium assembly 7/1105 56/162410.084178461 0.286545114  
 0.229597158 CCL21/CCR7/DPYSL3/GAP43/GPM6A/NLGN1/TGFB3 7  
 GO:0051155 BP positive regulation of striated muscle cell differentiation 7/1105  
 56/162410.084178461 0.286545114 0.229597158  
 CXCL9/EHD2/GREM1/IGF1/MYOC/RBM24/SMYD1 7  
 GO:0032755 BP positive regulation of interleukin-6 production 10/1105 90/16241  
 0.084681083 0.288056427 0.230808113  
 ADCYAP1/C1QTNF4/TLR7/TLR8/TLR9/IL17A/IL17F/IL36G/IL36RN/IL37 10  
 GO:0035567 BP non-canonical Wnt signaling pathway 15/1105 150/16241 0.086105943  
 0.288981057 0.231548983  
 CAMK2A/DACT1/DKK1/FRZB/GNAO1/MYOC/PRICKLE1/PRICKLE2/ROR2/RSPO3/SFRP1/SFRP  
 2/SFRP4/WNT9B/GRHL315  
 GO:0002701 BP negative regulation of production of molecular mediator of immune response  
 5/1105 35/162410.086161907 0.288981057 0.231548983  
 CD22/FCGR2B/TGFB3/APOA1/APOA2 5  
 GO:0010665 BP regulation of cardiac muscle cell apoptotic process 5/1105 35/16241  
 0.086161907 0.288981057 0.231548983 CAMK2A/HAND2/HSPB6/MYOC/SFRP2 5  
 GO:0033280 BP response to vitamin D 5/1105 35/162410.086161907 0.288981057  
 0.231548983 PENK/SFRP1/TNC/BMP7/FGF23 5  
 GO:0046329 BP negative regulation of JNK cascade 5/1105 35/162410.086161907  
 0.288981057 0.231548983 DACT1/SFRP1/SFRP2/AMBP/KLHL31 5  
 GO:0051930 BP regulation of sensory perception of pain 5/1105 35/162410.086161907  
 0.288981057 0.231548983 SCN11A/SPX/VIP/NPFF/P2RX3 5  
 GO:0071354 BP cellular response to interleukin-6 5/1105 35/162410.086161907  
 0.288981057 0.231548983 C1QTNF4/PTGIS/ABCC2/FGF23/FGG 5  
 GO:0090207 BP regulation of triglyceride metabolic process 5/1105 35/162410.086161907  
 0.288981057 0.231548983 APOE/APOA4/APOA5/APOBEC1/APOC35  
 GO:1905521 BP regulation of macrophage migration 5/1105 35/162410.086161907  
 0.288981057 0.231548983 CMKLR1/EMILIN1/P2RY12/THBS1/CXCL17 5  
 GO:0007565 BP female pregnancy 18/1105 187/16241 0.086177548 0.288981057  
 0.231548983  
 ADCYAP1/AR/CNR1/EPYC/FBLN1/IGFBP5/MMP2/PNOC/PTGIS/PZP/TGFB3/ABCC2/AMBP/DS  
 G1/EPO/IHH/NPFF/SCGB1A1 18  
 GO:0032612 BP interleukin-1 production 11/1105 102/16241 0.086180836 0.288981057  
 0.231548983  
 CCL19/CCR7/CMA1/IGF1/S1PR3/SUCNR1/TLR8/APOA1/CARD18/ORM1/ORM2 11  
 GO:0044242 BP cellular lipid catabolic process 20/1105 212/16241 0.086185294  
 0.288981057 0.231548983

ADIPOQ/APOE/CNR1/CYP1B1/FABP4/ADTRP/AKR1B10/APOA1/APOA2/APOA4/APOA5/APOC  
 3/CEL/CYP4F2/FABP1/FABP2/FABP6/PCK1/PLA2G4E/PLA2G4F 20  
 GO:0002053 BP positive regulation of mesenchymal cell proliferation 4/1105 25/16241  
 0.086188365 0.288981057 0.231548983 FGFR1/FOXP2/PRRX1/IHH 4  
 GO:0031069 BP hair follicle morphogenesis 4/1105 25/16241 0.086188365 0.288981057  
 0.231548983 FGF10/FGF7/IGFBP5/TGM3 4  
 GO:0032104 BP regulation of response to extracellular stimulus 4/1105 25/16241  
 0.086188365 0.288981057 0.231548983 CARTPT/NPY/SPX/NPFF 4  
 GO:0032107 BP regulation of response to nutrient levels 4/1105 25/16241 0.086188365  
 0.288981057 0.231548983 CARTPT/NPY/SPX/NPFF 4  
 GO:0051894 BP positive regulation of focal adhesion assembly 4/1105 25/16241  
 0.086188365 0.288981057 0.231548983 MYOC/SFRP1/THY1/HRG 4  
 GO:0060314 BP regulation of ryanodine-sensitive calcium-release channel activity 4/1105  
 25/16241 0.086188365 0.288981057 0.231548983 CASQ2/JPH2/JPH4/PLN 4  
 GO:0060914 BP heart formation 4/1105 25/16241 0.086188365 0.288981057  
 0.231548983 DKK1/HAND2/FOLR1/FOXH1 4  
 GO:0072273 BP metanephric nephron morphogenesis 4/1105 25/16241 0.086188365  
 0.288981057 0.231548983 PDGFRB/SIX2/WNT9B/SALL1 4  
 GO:0086011 BP membrane repolarization during action potential 4/1105 25/16241  
 0.086188365 0.288981057 0.231548983 FLNA/KCNA5/KCNE4/KCNJ5 4  
 GO:0002460 BP adaptive immune response based on somatic recombination of immune  
 receptors built from immunoglobulin superfamily domains 23/1105 250/16241 0.08643399  
 0.28960693 0.23205047  
 C1QA/C1QB/C1QC/C1R/C1S/C7/CCL19/CCR2/CD1C/CLC/CLEC4G/CR1/CR2/CXCL13/FCER2/F  
 CGR2B/FGL2/GAPT/IL12B/PTPRC/SERPING1/TLR8/C4BPB 23  
 GO:1902105 BP regulation of leukocyte differentiation 24/1105 263/16241 0.087174403  
 0.291888664 0.233878732  
 ADIPOQ/AXL/C1QC/CARTPT/CCL19/CCR2/CR1/FBN1/FCGR2B/FGL2/GLI2/GLI3/HLA-DOA/IL1  
 2B/LILRB4/PTPRC/ROR2/SFRP1/TLR9/FOXN1/IHH/IL17A/PGLYRP3/PGLYRP4 24  
 GO:1904063 BP negative regulation of cation transmembrane transport 9/1105  
 79/16241 0.087397375 0.292435904 0.234317213  
 ACTN2/ATP1A2/CASQ2/KCNE4/PLN/RGS4/TLR9/EPO/PCSK9 9  
 GO:0090066 BP regulation of anatomical structure size 41/1105 485/16241 0.087786004  
 0.293536318 0.235198931  
 ACTA2/ACTN2/ADCYAP1/ADD2/ADRB3/AGTR1/AGTR2/AKT3/APOE/ATP1A2/CCL21/CCR7/CO  
 MP/CXCL12/EDNRA/ELN/EPHA7/FMN2/FN1/HTR2A/HTR7/KCNA5/KCNMA1/KCNMB1/LMOD1/M  
 AG/MAGEL2/NEFL/NGF/NPPC/PLXNA4/PTPRS/SLC12A3/SLC8A1/SLIT2/TNR/VIP/WNT9B/FGA/FG  
 B/FGG 41  
 GO:0034766 BP negative regulation of ion transmembrane transport 10/1105 91/16241  
 0.08965343 0.297587945 0.238445338  
 ACTN2/ATP1A2/CASQ2/KCNE4/PLN/RGS4/THBS1/TLR9/EPO/PCSK9 10  
 GO:0002762 BP negative regulation of myeloid leukocyte differentiation 6/1105  
 46/16241 0.089977463 0.297587945 0.238445338  
 ADIPOQ/C1QC/CARTPT/FBN1/LILRB4/SFRP16

GO:0008347 BP glial cell migration 6/1105 46/162410.089977463 0.297587945  
 0.238445338 CCR2/GLI3/NDN/P2RY12/RELN/NR2E1 6  
 GO:0030574 BP collagen catabolic process 6/1105 46/162410.089977463 0.297587945  
 0.238445338 ADAMTS2/COL15A1/COL19A1/MMP2/MRC2/MMP3 6  
 GO:0031952 BP regulation of protein autophosphorylation 6/1105 46/162410.089977463  
 0.297587945 0.238445338 ADIPOQ/EPHA7/GFRA2/GPNMB/GREM1/PTPRC 6  
 GO:0060976 BP coronary vasculature development 6/1105 46/162410.089977463  
 0.297587945 0.238445338 HAND2/LTBP1/MYOC/PDGFRB/PRICKLE1/SGCD 6  
 GO:1904645 BP response to amyloid-beta 6/1105 46/162410.089977463 0.297587945  
 0.238445338 FCGR2B/IGF1/MMP2/NGFR/VCAM1/MMP3 6  
 GO:0001780 BP neutrophil homeostasis 3/1105 16/162410.090589791 0.297587945  
 0.238445338 AXL/CCR2/JAM3 3  
 GO:0002418 BP immune response to tumor cell 3/1105 16/162410.090589791  
 0.297587945 0.238445338 CRTAM/IL12B/HRG 3  
 GO:0002693 BP positive regulation of cellular extravasation 3/1105 16/162410.090589791  
 0.297587945 0.238445338 CCR2/ELANE/THY1 3  
 GO:0006910 BP phagocytosis, recognition 3/1105 16/162410.090589791 0.297587945  
 0.238445338 COLEC12/FCN1/TUB 3  
 GO:0010875 BP positive regulation of cholesterol efflux 3/1105 16/162410.090589791  
 0.297587945 0.238445338 ADIPOQ/APOE/APOA1 3  
 GO:0014061 BP regulation of norepinephrine secretion 3/1105 16/162410.090589791  
 0.297587945 0.238445338 AGTR2/KCNB1/P2RY12 3  
 GO:0021542 BP dentate gyrus development 3/1105 16/162410.090589791 0.297587945  
 0.238445338 EMX2/NEUROD1/NR2E13  
 GO:0032604 BP granulocyte macrophage colony-stimulating factor production 3/1105  
 16/162410.090589791 0.297587945 0.238445338 IL12B/TLR9/IL17F 3  
 GO:0032695 BP negative regulation of interleukin-12 production 3/1105 16/16241  
 0.090589791 0.297587945 0.238445338 CMKLR1/THBS1/TLR8 3  
 GO:0055119 BP relaxation of cardiac muscle 3/1105 16/162410.090589791 0.297587945  
 0.238445338 ATP1A2/PLN/SLC8A1 3  
 GO:0060977 BP coronary vasculature morphogenesis 3/1105 16/162410.090589791  
 0.297587945 0.238445338 HAND2/PDGFRB/SGCD 3  
 GO:0070593 BP dendrite self-avoidance 3/1105 16/162410.090589791 0.297587945  
 0.238445338 DSCAML1/PALLD/TNN 3  
 GO:0072224 BP metanephric glomerulus development 3/1105 16/162410.090589791  
 0.297587945 0.238445338 ADIPOQ/AGTR2/PDGFRB 3  
 GO:0090036 BP regulation of protein kinase C signaling 3/1105 16/162410.090589791  
 0.297587945 0.238445338 AKAP12/SEZ6L/ADGRV1 3  
 GO:0097091 BP synaptic vesicle clustering 3/1105 16/162410.090589791 0.297587945  
 0.238445338 CDH2/NLGN1/SYNDIG1 3  
 GO:1904754 BP positive regulation of vascular associated smooth muscle cell migration  
 3/1105 16/162410.090589791 0.297587945 0.238445338 ADAMTS1/IGFBP5/TERT 3  
 GO:0019229 BP regulation of vasoconstriction 7/1105 57/162410.090633462  
 0.297587945 0.238445338 AGTR1/ATP1A2/HTR2A/KCNA5/FGA/FGB/FGG 7

GO:0045806 BP negative regulation of endocytosis 7/1105 57/162410.090633462  
0.297587945 0.238445338 ADIPOQ/EPHA3/FCGR2B/LRRTM1/SYT11/APOC3/PCSK9 7

GO:0050922 BP negative regulation of chemotaxis 7/1105 57/162410.090633462  
0.297587945 0.238445338 CXCL13/ELANE/GREM1/KLRC4-KLRK1/SLIT2/THBS1/HRG 7

GO:0071385 BP cellular response to glucocorticoid stimulus 7/1105 57/162410.090633462  
0.297587945 0.238445338 ADCYAP1/AGTR2/FLT3/SERPINF1/ABCC2/PCK1/UGT1A1 7

GO:0033559 BP unsaturated fatty acid metabolic process 11/1105 103/16241  
0.090879983 0.298198047 0.238934189  
CYP1B1/PTGDS/PTGIS/AKR1C4/CYP2B6/CYP2C19/CYP2J2/CYP4F2/CYP4F8/GSTA1/PLA2G4F  
11

GO:0031345 BP negative regulation of cell projection organization 17/1105 176/16241  
0.091125084 0.29880268 0.239418657  
APOE/CCL21/DKK1/DPYSL3/EPHA7/MAG/NGFR/NLGN1/PTPRS/RGMA/SLIT2/SPOCK1/STMN  
2/THY1/TNR/VIM/HRG 17

GO:0034754 BP cellular hormone metabolic process 13/1105 127/16241 0.09126038  
0.29904669 0.239614173  
ADH1B/CYP1B1/ADH7/AKR1B10/AKR1C4/CYP3A4/HSD3B1/TTR/UGT1A1/UGT1A3/UGT1A7/  
UGT1A8/UGT1A9 13

GO:0046660 BP female sex differentiation 12/1105 115/16241 0.091351211  
0.299144767 0.239692758  
ADAMTS1/ADCYAP1/ADCYAP1R1/AXL/FGF10/PCYT1B/PTPRN/RETN/SFRP1/SLIT2/SLIT3/ZFP  
M2 12

GO:0043405 BP regulation of MAP kinase activity 29/1105 329/16241 0.091483329  
0.299377821 0.239879495  
ADIPOQ/ALK/APOE/CARTPT/CCL19/DKK1/ELANE/FGF10/FGF2/FGFR1/FLT3/GHR/HTR2A/IGF  
1/NGF/NRK/PDGFRB/PTPRC/RGS4/ROR2/SFRP1/SFRP2/TGFB3/THBS1/TLR9/UCHL1/ZEB2/BMP7/  
CXCL17 29

GO:0007260 BP tyrosine phosphorylation of STAT protein 9/1105 80/162410.092861531  
0.303281808 0.243007604 CSF1R/FLT3/GHR/IGF1/IL12B/IL21/IL31RA/PECAM1/EPO 9

GO:0048477 BP oogenesis 9/1105 80/162410.092861531 0.303281808 0.243007604  
DAZL/FMN2/IGF1/NPPC/PDE3A/IHH/MCMDC2/TDRD5/YBX2 9

GO:1902803 BP regulation of synaptic vesicle transport 9/1105 80/162410.092861531  
0.303281808 0.243007604  
CAMK2A/CHRM2/CHRNA6/CNR1/GRIK5/HTR2A/NLGN1/PRKCB/SYT49

GO:0006836 BP neurotransmitter transport 24/1105 265/16241 0.092933238  
0.30331433 0.243033662  
ADCYAP1/ATP1A2/CAMK2A/CHAT/CHRM2/CHRNA3/CHRNA6/CNR1/GRIK5/HTR2A/NLGN1/N  
RXN2/PRKCB/RGS4/SLC18A3/SLC6A17/SLC6A2/SV2B/SYT11/SYT4/TACR2/DDC/HTR2C/SLC6A7  
24

GO:0009746 BP response to hexose 18/1105 189/16241 0.093032262 0.303435904  
0.243131074  
ADCY5/ADIPOQ/CMA1/COL4A3/COL6A2/EPHA5/GRIK5/KCNB1/PTPRN/SERPINF1/SLC8A1/T  
HBS1/APOA2/FOXA2/MLXIPL/NEUROD1/PCK1/RFX6 18

GO:0097696 BP STAT cascade 15/1105 152/16241 0.093826351 0.305620052

0.244881145  
CCR2/CSF1R/CYP1B1/FLT3/GHR/IGF1/IL10RA/IL12B/IL21/IL31RA/PECAM1/PTPRC/EPO/F2/N  
EUROD1 15  
GO:2001236 BP regulation of extrinsic apoptotic signaling pathway 15/1105 152/16241  
0.093826351 0.305620052 0.244881145  
AGTR2/AR/FGF10/FGFR1/IGF1/PTPRC/SERPINE1/SFRP1/SFRP2/THBS1/TIMP3/FGA/FGB/FGG  
/TERT 15  
GO:0009112 BP nucleobase metabolic process 5/1105 36/16241 0.094745484  
0.306967394 0.245960716 AOX1/DPYS/GDA/TTR/XDH 5  
GO:0014911 BP positive regulation of smooth muscle cell migration 5/1105 36/16241  
0.094745484 0.306967394 0.245960716 ADAMTS1/IGF1/IGFBP5/PDGFRB/TERT 5  
GO:0032941 BP secretion by tissue 5/1105 36/16241 0.094745484 0.306967394  
0.245960716 FGF10/NPR3/TAC1/TIFAB/CEL 5  
GO:0051931 BP regulation of sensory perception 5/1105 36/16241 0.094745484  
0.306967394 0.245960716 SCN11A/SPX/VIP/NPFF/P2RX3 5  
GO:0099622 BP cardiac muscle cell membrane repolarization 5/1105 36/16241  
0.094745484 0.306967394 0.245960716 ANK2/FLNA/KCNA5/KCNE4/KCNJ5 5  
GO:1901021 BP positive regulation of calcium ion transmembrane transporter activity  
5/1105 36/16241 0.094745484 0.306967394 0.245960716  
ANK2/CASQ1/FGF14/JPH2/STAC 5  
GO:1903053 BP regulation of extracellular matrix organization 5/1105 36/16241  
0.094745484 0.306967394 0.245960716 AEBP1/ANTXR1/DDR2/EMILIN1/ADTRP 5  
GO:0001678 BP cellular glucose homeostasis 14/1105 140/16241 0.094864923  
0.306967394 0.245960716  
ADCY5/CARTPT/CMA1/EPHA5/GRIK5/KCNB1/NGFR/PTPRN/SERPINF1/FOXA2/MLXIPL/NEUR  
OD1/PCK1/RFX6 14  
GO:0042133 BP neurotransmitter metabolic process 14/1105 140/16241 0.094864923  
0.306967394 0.245960716  
AGTR2/BCHE/CHAT/CYP1B1/DPYS/ITGB2/KLRC4-KLRK1/MOXD1/PRIMA1/PTGIS/AGXT/AGXT  
2/DDC/PAH 14  
GO:1903169 BP regulation of calcium ion transmembrane transport 14/1105 140/16241  
0.094864923 0.306967394 0.245960716  
ANK2/ATP1A2/CASQ1/CASQ2/CXCL9/FGF14/JPH2/JPH4/PLN/SLC8A1/STAC/THY1/TLR9/F2  
14  
GO:1903409 BP reactive oxygen species biosynthetic process 11/1105 104/16241  
0.095731605 0.309567901 0.248044399  
AGTR2/CYBB/CYP1B1/ITGB2/KLRC4-KLRK1/MPO/PTGIS/AGXT2/DUOX2/DUOX2/SLC30A10  
11  
GO:0002793 BP positive regulation of peptide secretion 25/1105 279/16241 0.096311315  
0.310259297 0.248598386  
ADCYAP1/AGTR2/AKAP12/BLK/C1QTNF4/CCL19/CLEC6A/CLEC9A/CRTAM/CSF1R/FCN1/GRP/  
IGF1/TGFB3/TLR8/FGA/FGB/FGG/IL17A/IL17F/KISS1/ORM1/ORM2/RFX6/TFR2 25  
GO:0002026 BP regulation of the force of heart contraction 4/1105 26/16241 0.096640213  
0.310259297 0.248598386 ATP1A2/MYL3/PLN/SLC8A1 4

GO:0010669 BP epithelial structure maintenance 4/1105 26/162410.096640213  
0.310259297 0.248598386 SERPINA3/TLR9/MUC4/NEUROD1 4

GO:0010719 BP negative regulation of epithelial to mesenchymal transition 4/1105  
26/162410.096640213 0.310259297 0.248598386 DACT3/SFRP1/SFRP2/FOXA2 4

GO:0036151 BP phosphatidylcholine acyl-chain remodeling 4/1105 26/162410.096640213  
0.310259297 0.248598386 PLA2G2D/PLA2G2F/PLA2G4E/PLA2G4F 4

GO:0048668 BP collateral sprouting 4/1105 26/162410.096640213 0.310259297  
0.248598386 EPHA7/NGF/PTPRS/ZEB2 4

GO:0060074 BP synapse maturation 4/1105 26/162410.096640213 0.310259297  
0.248598386 NEFL/RELN/SEZ6L/SHANK1 4

GO:0061437 BP renal system vasculature development 4/1105 26/162410.096640213  
0.310259297 0.248598386 ACTA2/PDGFRB/PECAM1/BMP7 4

GO:0061440 BP kidney vasculature development 4/1105 26/162410.096640213  
0.310259297 0.248598386 ACTA2/PDGFRB/PECAM1/BMP7 4

GO:0071377 BP cellular response to glucagon stimulus 4/1105 26/162410.096640213  
0.310259297 0.248598386 ADCY2/ADCY5/GLP2R/PCK1 4

GO:0099623 BP regulation of cardiac muscle cell membrane repolarization 4/1105  
26/162410.096640213 0.310259297 0.248598386 ANK2/FLNA/KCNA5/KCNE4 4

GO:0050853 BP B cell receptor signaling pathway 7/1105 58/162410.097358415  
0.311902607 0.249915105 BLK/CD22/CMTM3/FCGR2B/MS4A1/PRKCB/PTPRC 7

GO:0051926 BP negative regulation of calcium ion transport 7/1105 58/162410.097358415  
0.311902607 0.249915105 ATP1A2/CASQ2/GNAO1/PLN/TLR9/EPO/SEMG1 7

GO:0055021 BP regulation of cardiac muscle tissue growth 7/1105 58/162410.097358415  
0.311902607 0.249915105 FGF2/FGFR1/IGF1/KCNK2/PI16/RGS4/ZFPM2 7

GO:0009311 BP oligosaccharide metabolic process 6/1105 47/162410.097533063  
0.311902607 0.249915105 ST6GAL2/ST6GALNAC5/ST8SIA2/ST8SIA6/FBP2/FUT3 6

GO:0009994 BP oocyte differentiation 6/1105 47/162410.097533063 0.311902607  
0.249915105 DAZL/IGF1/NPPC/PDE3A/TDRD5/YBX2 6

GO:0048806 BP genitalia development 6/1105 47/162410.097533063 0.311902607  
0.249915105 AR/AXL/FGF10/ROR2/TIFAB/WNT9B 6

GO:0030308 BP negative regulation of cell growth 17/1105 178/16241 0.098492421  
0.314039923 0.251627651  
AGTR2/CRYAB/DACT3/EPHA7/FHL1/FRZB/MAG/PI16/PTPRS/RGS4/SFRP1/SFRP2/SLIT2/SLIT3  
/TNR/HRG/TRIM40 17

GO:0007045 BP cell-substrate adherens junction assembly 9/1105 81/162410.098521075  
0.314039923 0.251627651  
ACTN2/EPHA3/FERMT2/MYOC/SFRP1/SORBS1/THBS1/THY1/HRG 9

GO:0014032 BP neural crest cell development 9/1105 81/162410.098521075  
0.314039923 0.251627651 ANXA6/EDNRA/FN1/HAND2/NRP2/SOX10/ZEB2/BMP7/FOLR1  
9

GO:0030301 BP cholesterol transport 9/1105 81/162410.098521075 0.314039923  
0.251627651 ADIPOQ/APOE/APOA1/APOA2/APOA4/APOA5/APOC3/CEL/PCSK9 9

GO:0048041 BP focal adhesion assembly 9/1105 81/162410.098521075 0.314039923  
0.251627651 ACTN2/EPHA3/FERMT2/MYOC/SFRP1/SORBS1/THBS1/THY1/HRG 9

GO:0007548 BP sex differentiation 24/1105 267/16241 0.09893584 0.315157489  
0.252523113  
ADAMTS1/ADCYAP1/ADCYAP1R1/AR/AXL/DHH/FGF10/FLNA/PCYT1B/PDGFRB/PTPRN/RETN/  
ROR2/SFRP1/SFRP2/SLIT2/SLIT3/TIFAB/UTF1/WNT9B/ZFPM2/HOXA11/REN/SALL1 24

GO:0010595 BP positive regulation of endothelial cell migration 10/1105 93/16241  
0.100112508 0.318286497 0.255030262  
ADGRA2/AKT3/ANGPT4/FGF2/FGFR1/NRP2/SMOC2/SPARC/THBS1/FGFBP1 10

GO:0048704 BP embryonic skeletal system morphogenesis 10/1105 93/16241 0.100112508  
0.318286497 0.255030262  
COL11A1/DSCAML1/GLI3/PRRX1/SIX2/TGFB3/WNT9A/WNT9B/BMP7/HOXA11 10

GO:2000379 BP positive regulation of reactive oxygen species metabolic process 10/1105  
93/16241 0.100112508 0.318286497 0.255030262  
AGTR1/AGTR2/ITGB2/KLRC4-KLRK1/PDGFRB/THBS1/AGXT2/DUOXA2/F2/XDH 10

GO:0099643 BP signal release from synapse 16/1105 166/16241 0.100299011  
0.31846719 0.255175043  
CAMK2A/CHAT/CHRM2/CHRNA3/CHRNA6/CNR1/GRIK5/HTR2A/NLGN1/NRXN2/PRKCB/SLC1  
8A3/SYT11/SYT4/SYT6/TACR2 16

GO:1990138 BP neuron projection extension 16/1105 166/16241 0.100299011  
0.31846719 0.255175043  
APOE/CACNG7/CXCL12/DCLK1/FN1/MAG/NDN/NRP2/PLXNA4/PTPRS/SLIT2/SLIT3/SYT4/TN  
R/EMX1/REG1A 16

GO:0050868 BP negative regulation of T cell activation 11/1105 105/16241 0.100735452  
0.319646344 0.256119853  
CLEC4G/FCGR2B/FGL2/GLI3/GPNMB/LRRC32/PLA2G2D/VSIG4/IHH/PLA2G2F/SCGB1A1 11

GO:0007210 BP serotonin receptor signaling pathway 5/1105 37/16241 0.103746519  
0.32708516 0.262080279 CHRM2/HTR2A/HTR3A/HTR7/HTR2C 5

GO:0007431 BP salivary gland development 5/1105 37/16241 0.103746519 0.32708516  
0.262080279 FGF10/FGF7/FGFR1/TGFB3/BMP7 5

GO:0048846 BP axon extension involved in axon guidance 5/1105 37/16241 0.103746519  
0.32708516 0.262080279 CXCL12/NRP2/PLXNA4/SLIT2/SLIT3 5

GO:1902042 BP negative regulation of extrinsic apoptotic signaling pathway via death domain  
receptors 5/1105 37/16241 0.103746519 0.32708516 0.262080279  
SERPINE1/SFRP2/FGA/FGB/FGG 5

GO:1902284 BP neuron projection extension involved in neuron projection guidance 5/1105  
37/16241 0.103746519 0.32708516 0.262080279 CXCL12/NRP2/PLXNA4/SLIT2/SLIT3  
5

GO:1905314 BP semi-lunar valve development 5/1105 37/16241 0.103746519  
0.32708516 0.262080279 ELN/EMILIN1/HEYL/SLIT2/SLIT3 5

GO:0032233 BP positive regulation of actin filament bundle assembly 7/1105 59/16241  
0.104350395 0.32708516 0.262080279  
FLNA/MYOC/SFRP1/SYNPO2/TAC1/TGFB3/APOA1 7

GO:0050701 BP interleukin-1 secretion 7/1105 59/16241 0.104350395 0.32708516  
0.262080279 CCL19/CCR7/TLR8/APOA1/CARD18/ORM1/ORM2 7

GO:0070527 BP platelet aggregation 7/1105 59/16241 0.104350395 0.32708516

0.262080279 COMP/FLNA/MYL9/P2RY12/FGA/FGB/FGG 7  
 GO:0008625 BP extrinsic apoptotic signaling pathway via death domain receptors 9/1105  
 82/162410.104374939 0.32708516 0.262080279  
 NGF/SERPINE1/SFRP1/SFRP2/THBS1/TIMP3/FGA/FGB/FGG9  
 GO:1903725 BP regulation of phospholipid metabolic process 9/1105 82/16241  
 0.104374939 0.32708516 0.262080279  
 CCL19/CCL21/CCR7/FGF2/FLT3/HTR2A/P2RY12/PDGFRB/HTR2C 9  
 GO:0002689 BP negative regulation of leukocyte chemotaxis 3/1105 17/162410.104677905  
 0.32708516 0.262080279 GREM1/KLRC4-KLRK1/SLIT2 3  
 GO:0007194 BP negative regulation of adenylate cyclase activity 3/1105 17/16241  
 0.104677905 0.32708516 0.262080279 CCR2/NPR3/ADGRV1 3  
 GO:0007635 BP chemosensory behavior 3/1105 17/162410.104677905 0.32708516  
 0.262080279 SHANK1/OBP2B/P2RX3 3  
 GO:0010984 BP regulation of lipoprotein particle clearance 3/1105 17/162410.104677905  
 0.32708516 0.262080279 GPIHBP1/APOC3/PCSK9 3  
 GO:0017085 BP response to insecticide 3/1105 17/162410.104677905 0.32708516  
 0.262080279 NEFL/SCN2B/DDC 3  
 GO:0031643 BP positive regulation of myelination 3/1105 17/162410.104677905  
 0.32708516 0.262080279 MAG/SOX10/TENM4 3  
 GO:0042249 BP establishment of planar polarity of embryonic epithelium 3/1105  
 17/162410.104677905 0.32708516 0.262080279 SFRP1/SFRP2/GRHL3 3  
 GO:0042268 BP regulation of cytolysis 3/1105 17/162410.104677905 0.32708516  
 0.262080279 CFHR1/PGLYRP3/PGLYRP4 3  
 GO:0048243 BP norepinephrine secretion 3/1105 17/162410.104677905 0.32708516  
 0.262080279 AGTR2/KCNB1/P2RY12 3  
 GO:0051709 BP regulation of killing of cells of other organism 3/1105 17/16241  
 0.104677905 0.32708516 0.262080279 FCER2/PGLYRP3/PGLYRP4 3  
 GO:0060192 BP negative regulation of lipase activity 3/1105 17/162410.104677905  
 0.32708516 0.262080279 APOA1/APOA2/APOC3 3  
 GO:2000380 BP regulation of mesoderm development 3/1105 17/162410.104677905  
 0.32708516 0.262080279 DKK1/FGFR1/SFRP2 3  
 GO:2000726 BP negative regulation of cardiac muscle cell differentiation 3/1105  
 17/162410.104677905 0.32708516 0.262080279 DKK1/PI16/RGS4 3  
 GO:0032956 BP regulation of actin cytoskeleton organization 28/1105 321/16241  
 0.105307928 0.328341934 0.263087282  
 ACTN2/ADD2/CCL21/CCR7/CSF1R/CXCL12/ELN/EPHA3/EPHA5/FLNA/FMN2/JAM3/LMOD1/  
 MAGEL2/MYOC/PDGFRB/RGS4/SFRP1/SHANK1/SLIT2/SYNPO2/TAC1/TGFB3/TMEFF2/APOA1/GR  
 HL3/HRG/RHOV 28  
 GO:0060070 BP canonical Wnt signaling pathway 28/1105 321/16241 0.105307928  
 0.328341934 0.263087282  
 ADGRA2/APOE/BICC1/CDH2/COL1A1/DACT1/DACT3/DKK1/FGF10/FRZB/GLI3/GREM1/IGFBP  
 4/PRICKLE1/ROR2/RSPO1/RSPO2/RSPO3/SFRP1/SFRP2/SFRP4/SOX10/TBX18/TNN/WNT9A/WNT  
 9B/WWTR1/FOLR1 28  
 GO:0021517 BP ventral spinal cord development 6/1105 48/162410.105414338

0.328341934 0.263087282 GLI2/GLI3/PHOX2A/RELN/EVX1/NKX6-2 6  
 GO:0035272 BP exocrine system development 6/1105 48/162410.105414338  
 0.328341934 0.263087282 FGF10/FGF7/FGFR1/SOX10/TGFB3/BMP7 6  
 GO:2000351 BP regulation of endothelial cell apoptotic process 6/1105 48/16241  
 0.105414338 0.328341934 0.263087282 SERPINE1/THBS1/FGA/FGB/FGG/TERT 6  
 GO:0032411 BP positive regulation of transporter activity 11/1105 106/16241  
 0.105891055 0.329617783 0.264109568  
 ACTN2/ANK2/CASQ1/CCR2/FGF14/HTR3A/JPH2/KCNA1/LRRC38/RELN/STAC 11  
 GO:0015711 BP organic anion transport 39/1105 467/16241 0.107106558 0.332992448  
 0.266813553  
 AGTR2/APOE/ATP1A2/ATP8B2/FABP4/FOLR2/NPY5R/NTRK2/PLA2G2D/RGS4/SLC6A17/SPX/S  
 YT4/THBS1/ABCC2/AGXT/AKR1C4/APOA1/APOA2/APOA4/APOA5/APOC3/ATP10B/CA1/CA4/CYP4  
 F2/FABP1/FOLR1/G6PC/GLTPD2/LCN12/MTTP/PLA2G12B/PLA2G2F/PLA2G4F/SLC13A2/SLC17A4/  
 SLC26A3/SLC6A7 39  
 GO:0003298 BP physiological muscle hypertrophy 4/1105 27/162410.107653096  
 0.332992448 0.266813553 AGTR2/IGF1/PI16/RGS4 4  
 GO:0003301 BP physiological cardiac muscle hypertrophy 4/1105 27/162410.107653096  
 0.332992448 0.266813553 AGTR2/IGF1/PI16/RGS4 4  
 GO:0006706 BP steroid catabolic process 4/1105 27/162410.107653096 0.332992448  
 0.266813553 APOE/CEL/CYP3A4/FGF23 4  
 GO:0007263 BP nitric oxide mediated signal transduction 4/1105 27/162410.107653096  
 0.332992448 0.266813553 AGTR2/APOE/THBS1/NEUROD1 4  
 GO:0036336 BP dendritic cell migration 4/1105 27/162410.107653096 0.332992448  
 0.266813553 CCL19/CCL21/CCR2/CCR7 4  
 GO:0045671 BP negative regulation of osteoclast differentiation 4/1105 27/16241  
 0.107653096 0.332992448 0.266813553 CARTPT/FBN1/LILRB4/SFRP1 4  
 GO:0045761 BP regulation of adenylate cyclase activity 4/1105 27/162410.107653096  
 0.332992448 0.266813553 CCR2/NPR3/TIMP2/ADGRV1 4  
 GO:0050858 BP negative regulation of antigen receptor-mediated signaling pathway 4/1105  
 27/162410.107653096 0.332992448 0.266813553 CD22/FCGR2B/LILRB4/THY1 4  
 GO:0061049 BP cell growth involved in cardiac muscle cell development 4/1105  
 27/162410.107653096 0.332992448 0.266813553 AGTR2/IGF1/PI16/RGS4 4  
 GO:0050795 BP regulation of behavior 8/1105 71/162410.108320079 0.334844699  
 0.268297688 APOE/CNR1/KCNA2/NLGN1/PENK/PTGDS/RELN/RETN 8  
 GO:0019933 BP cAMP-mediated signaling 17/1105 181/16241 0.110224119  
 0.340516272 0.272842092  
 ADCY2/ADCY5/ADCYAP1/ADCYAP1R1/ADGRB3/ADGRD1/ADRB3/CXCL9/EPHA5/GPR26/PDE3  
 A/PLN/PTGER3/PTGFR/VIP/ADGRG7/DEFB1 17  
 GO:0060291 BP long-term synaptic potentiation 9/1105 83/162410.110421684  
 0.340698061 0.272987753  
 APOE/IGSF11/LRRTM1/NLGN1/NTRK2/RELN/SHANK1/TNR/NR2E1 9  
 GO:0070542 BP response to fatty acid 9/1105 83/162410.110421684 0.340698061  
 0.272987753 ADIPOQ/CCL19/CCL21/CCR7/KCNK4/PTGDR/PTGFR/SFRP1/TNC 9  
 GO:0002065 BP columnar/cuboidal epithelial cell differentiation 11/1105 107/16241

0.111197722 0.342832545 0.27469803  
 CDH2/FGFR1/NKX3-2/NPY/SERPINE1/ATOH1/CDX2/DLX3/EMX1/NEUROD1/RFX6 11  
 GO:0006835 BP dicarboxylic acid transport 10/1105 95/162410.111253069 0.342832545  
 0.27469803 ATP1A2/FOLR2/NPY5R/NTRK2/SYT4/ABCC2/AGXT/FOLR1/SLC13A2/SLC26A3  
 10  
 GO:0045600 BP positive regulation of fat cell differentiation 7/1105 60/162410.111605783  
 0.343421306 0.27516978 CMKLR1/FRZB/HTR2A/MEDAG/SFRP1/SFRP2/HTR2C 7  
 GO:0071384 BP cellular response to corticosteroid stimulus 7/1105 60/162410.111605783  
 0.343421306 0.27516978 ADCYAP1/AGTR2/FLT3/SERPINF1/ABCC2/PCK1/UGT1A1 7  
 GO:0060541 BP respiratory system development 18/1105 194/16241 0.111653873  
 0.343421306 0.27516978  
 ADAMTS2/CRISPLD2/FGF10/FGF7/FGFR1/FOXP2/GLI2/GLI3/HEG1/HSD11B1/IGFBP5/MYOC  
 D/PDGFRB/RSP02/SPARC/TGFB3/TNC/ZFPM2 18  
 GO:0051017 BP actin filament bundle assembly 14/1105 144/16241 0.112475147  
 0.345730865 0.277020337  
 ADD2/DPYSL3/ELN/FLNA/FMN2/MYOC/SFRP1/SHANK1/SORBS1/SYNPO2/TAC1/TGFB3/TME  
 FF2/APOA1 14  
 GO:0002707 BP negative regulation of lymphocyte mediated immunity 5/1105  
 38/162410.113153495 0.346947545 0.277995215 CLEC4G/CR1/FCGR2B/PTPRC/C4BPB  
 5  
 GO:0030501 BP positive regulation of bone mineralization 5/1105 38/162410.113153495  
 0.346947545 0.277995215 SLC8A1/TGFB3/TMEM119/ADGRV1/BMP7 5  
 GO:0044091 BP membrane biogenesis 5/1105 38/162410.113153495 0.346947545  
 0.277995215 CDH2/CLIP3/NLGN1/NRXN2/CEL 5  
 GO:0086004 BP regulation of cardiac muscle cell contraction 5/1105 38/162410.113153495  
 0.346947545 0.277995215 ANK2/ATP1A2/CTNNA3/FLNA/PLN5  
 GO:0002704 BP negative regulation of leukocyte mediated immunity 6/1105 49/16241  
 0.113614952 0.347928081 0.278780879 CCR2/CLEC4G/CR1/FCGR2B/PTPRC/C4BPB 6  
 GO:0098900 BP regulation of action potential 6/1105 49/162410.113614952 0.347928081  
 0.278780879 ANK2/CNR1/CTNNA3/FLNA/KCNB1/TAC1 6  
 GO:1901861 BP regulation of muscle tissue development 13/1105 132/16241  
 0.11420912 0.349501327 0.280041458  
 DKK1/FGF2/FGFR1/GREM1/IGF1/IGFBP5/JPH2/KCNK2/MYOC/PI16/RBM24/RGS4/ZFPM2  
 13  
 GO:1902903 BP regulation of supramolecular fiber organization 28/1105 324/16241  
 0.114270996 0.349501327 0.280041458  
 ACTN2/ADD2/AEBP1/APOE/CCL21/CCR7/CLIP3/CRYAB/CXCL12/ELN/EMILIN1/FLNA/FMN2/L  
 MOD1/MAGEL2/MAP1A/MYOC/NAV3/RGS4/SFRP1/SHANK1/SLIT2/STMN2/SYNPO2/TAC1/TGFB3  
 /TMEFF2/APOA1 28  
 GO:0002696 BP positive regulation of leukocyte activation 26/1105 298/16241  
 0.11484429 0.350964203 0.281213602  
 AXL/CCL19/CCL21/CCR2/CCR7/CLECL1/FGF10/GLI2/GLI3/HLA-DPA1/HLA-DPB1/IGF1/IL12B/I  
 L21/ITGB2/KLRC4-KLRK1/LILRB4/PTPRC/TAC1/THBS1/THY1/TLR9/VCAM1/EPO/HHLA2/IHH 26  
 GO:0071695 BP anatomical structure maturation 15/1105 157/16241 0.114963641

0.350964203 0.281213602  
 ADGRB3/C1QA/DAZL/GREM1/IGF1/MMP2/MYOC/NFASC/NPPC/PDE3A/TRIM58/EPO/FGG/  
 HOXB13/SIX3 15  
 GO:0098727 BP maintenance of cell number 15/1105 157/16241 0.114963641  
 0.350964203 0.281213602  
 CDH2/FGF10/FGF2/FOXD3/IGF1/PRRX1/SFRP1/SIX2/WNT9B/ASCL2/BMP7/CDX2/IGF2BP1/N  
 R2E1/SALL1 15  
 GO:0017157 BP regulation of exocytosis 19/1105 208/16241 0.116642575 0.355699278  
 0.285007629  
 CACNA1G/CAMK2A/CCR2/CHRM2/CHRNA6/CNR1/FCGR2B/GRIK5/HTR2A/ITGB2/KCNB1/NL  
 GN1/PRKCB/SYT11/SYT4/SYT6/FGA/FGB/FGG 19  
 GO:0051149 BP positive regulation of muscle cell differentiation 9/1105 84/16241  
 0.116659515 0.355699278 0.285007629  
 BOC/CDH2/CXCL9/EHD2/GREM1/IGF1/MYOC/RBM24/SMYD1 9  
 GO:0031341 BP regulation of cell killing 10/1105 96/16241 0.117076221 0.356565224  
 0.285701477  
 CD1C/CRTAM/FCER2/FCGR2B/IL12B/IL21/KLRK4-KLRK1/PTPRC/PGLYRP3/PGLYRP4 10  
 GO:0051147 BP regulation of muscle cell differentiation 14/1105 145/16241 0.117161293  
 0.356565224 0.285701477  
 BOC/CDH2/CXCL9/DKK1/EHD2/GREM1/IGF1/MYOC/PI16/RBM24/RBPMS2/RGS4/SMYD1/  
 TMEM119 14  
 GO:0061572 BP actin filament bundle organization 14/1105 145/16241 0.117161293  
 0.356565224 0.285701477  
 ADD2/DPYSL3/ELN/FLNA/FMN2/MYOC/SFRP1/SHANK1/SORBS1/SYNPO2/TAC1/TGFB3/TME  
 FF2/APOA1 14  
 GO:1901136 BP carbohydrate derivative catabolic process 17/1105 183/16241  
 0.118498561 0.359631565 0.288158414  
 BGN/DCN/DPYS/FGF2/KERA/LUM/NT5C1A/NUDT10/NUDT11/OGN/OMD/PRELP/SDC3/VCA  
 N/APOBEC1/PGLYRP3/PGLYRP4 17  
 GO:0048634 BP regulation of muscle organ development 13/1105 133/16241  
 0.119169825 0.359631565 0.288158414  
 DKK1/FGF2/FGFR1/GREM1/IGF1/JPH2/KCNK2/MYOC/PI16/RBM24/RGS4/TIFAB/ZFPM2  
 13  
 GO:0010575 BP positive regulation of vascular endothelial growth factor production 4/1105  
 28/16241 0.11920129 0.359631565 0.288158414 CYP1B1/SULF1/CXCL17/NOX1 4  
 GO:0021799 BP cerebral cortex radially oriented cell migration 4/1105 28/16241  
 0.11920129 0.359631565 0.288158414 GLI3/P2RY12/RELN/NR2E1 4  
 GO:1902624 BP positive regulation of neutrophil migration 4/1105 28/16241 0.11920129  
 0.359631565 0.288158414 CCL19/CCL21/CCR7/THBS4 4  
 GO:1905209 BP positive regulation of cardiocyte differentiation 4/1105 28/16241  
 0.11920129 0.359631565 0.288158414 GREM1/IGF1/MYOC/BMP7 4  
 GO:0007350 BP blastoderm segmentation 3/1105 18/16241 0.119559924 0.359631565  
 0.288158414 NRP2/TIFAB/TDRD5 3  
 GO:0009312 BP oligosaccharide biosynthetic process 3/1105 18/16241 0.119559924

0.359631565 0.288158414 ST6GALNAC5/FBP2/FUT3 3  
 GO:0010002 BP cardioblast differentiation 3/1105 18/162410.119559924 0.359631565  
 0.288158414 GREM1/MYOC/PRICKLE1 3  
 GO:0036148 BP phosphatidylglycerol acyl-chain remodeling 3/1105 18/162410.119559924  
 0.359631565 0.288158414 PLA2G2D/PLA2G2F/PLA2G4F 3  
 GO:0050765 BP negative regulation of phagocytosis 3/1105 18/162410.119559924  
 0.359631565 0.288158414 ADIPOQ/FCGR2B/SYT11 3  
 GO:0051767 BP nitric-oxide synthase biosynthetic process 3/1105 18/162410.119559924  
 0.359631565 0.288158414 AKAP12/FCER2/TLR9 3  
 GO:0051769 BP regulation of nitric-oxide synthase biosynthetic process 3/1105  
 18/162410.119559924 0.359631565 0.288158414 AKAP12/FCER2/TLR9 3  
 GO:0061050 BP regulation of cell growth involved in cardiac muscle cell development 3/1105  
 18/162410.119559924 0.359631565 0.288158414 IGF1/PI16/RGS4 3  
 GO:0071731 BP response to nitric oxide 3/1105 18/162410.119559924 0.359631565  
 0.288158414 CCL19/CCR7/MMP3 3  
 GO:0072077 BP renal vesicle morphogenesis 3/1105 18/162410.119559924 0.359631565  
 0.288158414 SIX2/WNT9B/SALL13  
 GO:0097094 BP craniofacial suture morphogenesis 3/1105 18/162410.119559924  
 0.359631565 0.288158414 GLI3/TGFB3/TIFAB 3  
 GO:1905276 BP regulation of epithelial tube formation 3/1105 18/162410.119559924  
 0.359631565 0.288158414 SFRP1/SFRP2/GRHL3 3  
 GO:2000773 BP negative regulation of cellular senescence 3/1105 18/162410.119559924  
 0.359631565 0.288158414 AKT3/SLC30A10/TERT 3  
 GO:0046717 BP acid secretion 12/1105 121/16241 0.120907514 0.363240188  
 0.29104986  
 AGTR2/NPY5R/NTRK2/PLA2G2D/PTGER3/SYT4/ABCC2/AGXT/CYP4F2/PLA2G12B/PLA2G2F/P  
 LA2G4F 12  
 GO:0048675 BP axon extension 12/1105 121/16241 0.120907514 0.363240188  
 0.29104986 APOE/CXCL12/DCLK1/FN1/MAG/NDN/NRP2/PLXNA4/PTPRS/SLIT2/SLIT3/TNR  
 12  
 GO:0003007 BP heart morphogenesis 22/1105 248/16241 0.12188425 0.365787062  
 0.293090568  
 ADAMTS1/COL11A1/COL5A1/DKK1/ELN/FLRT2/HAND2/HEG1/HEYL/MYL3/NPY1R/NPY5R/N  
 RP2/SFRP2/SLIT2/SLIT3/ZFPM2/BMP7/FOLR1/FOXH1/IHH/NOTO 22  
 GO:1901616 BP organic hydroxy compound catabolic process 8/1105 73/16241  
 0.121960876 0.365787062 0.293090568  
 APOE/MOXD1/ADH7/AKR1B10/CEL/CYP4F2/FGF23/SULT2A1 8  
 GO:0045103 BP intermediate filament-based process 6/1105 50/162410.122127602  
 0.365787062 0.293090568 DES/NEFL/SYNC/SYNN/VIM/KRT20 6  
 GO:0048168 BP regulation of neuronal synaptic plasticity 6/1105 50/162410.122127602  
 0.365787062 0.293090568 APOE/CAMK2A/EGR2/NETO1/SHISA8/SYT4 6  
 GO:0072523 BP purine-containing compound catabolic process 6/1105 50/16241  
 0.122127602 0.365787062 0.293090568 AOX1/NT5C1A/NUDT10/NUDT11/GDA/XDH 6  
 GO:0098739 BP import across plasma membrane 11/1105 109/16241 0.122260388

0.365961624 0.293230437  
 ABCC9/ATP1A2/ATP1A4/CNGA3/FOLR2/KCNJ5/RGS4/SLC12A3/SLC8A1/FOLR1/SLC9A2 11  
 GO:0030204 BP chondroitin sulfate metabolic process 5/1105 39/162410.122953414  
 0.366868812 0.29395733 BGN/DCN/DSEL/SPOCK3/VCAN 5  
 GO:0038179 BP neurotrophin signaling pathway 5/1105 39/162410.122953414  
 0.366868812 0.29395733 AGTR2/NDN/NGF/NGFR/NTRK2 5  
 GO:0090279 BP regulation of calcium ion import 5/1105 39/162410.122953414  
 0.366868812 0.29395733 CXCL12/PDGFRB/PLN/ATP2C2/SEMG1 5  
 GO:2000648 BP positive regulation of stem cell proliferation 5/1105 39/162410.122953414  
 0.366868812 0.29395733 GLI3/PTPRC/SOX10/NR2E1/TERT 5  
 GO:0014902 BP myotube differentiation 10/1105 97/162410.123065968 0.366868812  
 0.29395733  
 ADGRB3/CXCL9/EHD2/IGF1/MYOC/D/P2RX2/PLEKHO1/RBM24/SMYD1/TMEM119 10  
 GO:0001776 BP leukocyte homeostasis 9/1105 85/162410.123086279 0.366868812  
 0.29395733 AXL/CCR2/FLT3/GAPT/GPR174/JAM3/LMO1/TNFRSF13B/FOXP1  
 GO:0034308 BP primary alcohol metabolic process 9/1105 85/162410.123086279  
 0.366868812 0.29395733  
 ADH1B/CYP1B1/IGF1/ADH7/AKR1B10/AKR1C4/CYP3A4/SULT2A1/TTR 9  
 GO:0007189 BP adenylate cyclase-activating G protein-coupled receptor signaling pathway  
 13/1105 134/16241 0.12425285 0.36989697 0.296383673  
 ADCY2/ADCY5/ADCYAP1/ADGRB3/ADGRD1/ADRB3/CXCL9/GPR26/PLN/PTGER3/PTGFR/VIP/  
 ADGRG7 13  
 GO:0032675 BP regulation of interleukin-6 production 13/1105 134/16241 0.12425285  
 0.36989697 0.296383673  
 ADCYAP1/BPI/C1QTNF4/SYT11/TLR7/TLR8/TLR9/IL17A/IL17F/IL36G/IL36RN/IL37/ORM1 13  
 GO:0021782 BP glial cell development 11/1105 110/16241 0.128013917 0.380862726  
 0.305170095 C1QA/MAG/MYOC/NTRK2/PLP1/PRDM8/ROR2/SOX10/TENM4/VIM/NKX6-2  
 11  
 GO:0031669 BP cellular response to nutrient levels 20/1105 224/16241 0.129145797  
 0.383987312 0.307673701  
 CARTPT/COL1A1/CYBB/FOLR2/KCNB1/MAP1LC3C/P2RY12/PENK/SFRP1/TNC/WNT9B/DAPL1  
 /FGF23/FOLR1/FOXA2/KRT20/LCN2/P2RX3/PCK1/PCSK9 20  
 GO:0007009 BP plasma membrane organization 10/1105 98/162410.129220486  
 0.383987312 0.307673701  
 ANK2/ANXA6/AR/COL5A1/EHD2/PTPRC/SYT11/TMEFF2/XKR4/NOX1 10  
 GO:0010634 BP positive regulation of epithelial cell migration 13/1105 135/16241  
 0.129457337 0.384226248 0.307865151  
 ADGRA2/AKT3/ANGPT4/FGF10/FGF2/FGF7/FGFR1/NRP2/SMOC2/SPARC/TAC1/THBS1/FGFB  
 P1 13  
 GO:0046330 BP positive regulation of JNK cascade 13/1105 135/16241 0.129457337  
 0.384226248 0.307865151  
 CCL19/CCL21/CCR7/DKK1/FCGR2B/NRK/ROR2/TLR9/ZEB2/IL36G/IL36RN/IL37/NOX1 13  
 GO:0097306 BP cellular response to alcohol 9/1105 86/162410.129699479 0.384712465  
 0.308254737 ADCY2/ADCY5/CYBB/KCNMB1/PTGDR/PTGFR/SFRP1/TNC/UGT1A1 9

GO:0001954 BP positive regulation of cell-matrix adhesion 6/1105 51/162410.130944086  
0.385837279 0.309156006 CCL21/CCR7/MYOC/SFRP1/THY1/HRG 6

GO:0010830 BP regulation of myotube differentiation 6/1105 51/162410.130944086  
0.385837279 0.309156006 CXCL9/EHD2/MYOC/RBM24/SMYD1/TMEM119 6

GO:0043536 BP positive regulation of blood vessel endothelial cell migration 6/1105  
51/162410.130944086 0.385837279 0.309156006  
AKT3/ANGPT4/FGF2/FGFR1/THBS1/FGFBP1 6

GO:0043954 BP cellular component maintenance 6/1105 51/162410.130944086  
0.385837279 0.309156006 ADGRB3/APOE/CSF1R/FCGR2B/MYOC/RASSF8 6

GO:0045214 BP sarcomere organization 6/1105 51/162410.130944086 0.385837279  
0.309156006 ACTN2/CASQ1/CASQ2/LDB3/MYOZ2/TNNT36

GO:0051148 BP negative regulation of muscle cell differentiation 6/1105 51/16241  
0.130944086 0.385837279 0.309156006 DKK1/MYOC/PI16/RBPMS2/RGS4/TMEM119  
6

GO:0060563 BP neuroepithelial cell differentiation 6/1105 51/162410.130944086  
0.385837279 0.309156006 CDH2/FGFR1/SERPINE1/ATOH1/DLX3/EMX1 6

GO:1901862 BP negative regulation of muscle tissue development 6/1105 51/16241  
0.130944086 0.385837279 0.309156006 DKK1/IGFBP5/KCNK2/MYOC/PI16/RGS4 6

GO:2000649 BP regulation of sodium ion transmembrane transporter activity 6/1105  
51/162410.130944086 0.385837279 0.309156006  
ATP1A2/FXYD6/NETO1/SCN2B/FXYD4/PCSK9 6

GO:0010644 BP cell communication by electrical coupling 4/1105 29/162410.131256941  
0.385837279 0.309156006 ATP1A2/CASQ2/KCNA1/SLC8A1 4

GO:0040036 BP regulation of fibroblast growth factor receptor signaling pathway 4/1105  
29/162410.131256941 0.385837279 0.309156006 SMOC2/SULF1/THBS1/FGFBP1 4

GO:0042311 BP vasodilation 4/1105 29/162410.131256941 0.385837279 0.309156006  
ADRB3/AGTR2/APOE/KCNMA1 4

GO:0045954 BP positive regulation of natural killer cell mediated cytotoxicity 4/1105  
29/162410.131256941 0.385837279 0.309156006 CRTAM/IL12B/IL21/KLRC4-KLRK1 4

GO:0048730 BP epidermis morphogenesis 4/1105 29/162410.131256941 0.385837279  
0.309156006 FGF10/FGF7/IGFBP5/TGM3 4

GO:0051194 BP positive regulation of cofactor metabolic process 4/1105 29/16241  
0.131256941 0.385837279 0.309156006 HTR2A/IGF1/DUOX2/MLXIPL 4

GO:0044272 BP sulfur compound biosynthetic process 17/1105 186/16241 0.131585549  
0.386571899 0.309744627  
BGN/BHMT2/CDO1/DCN/DSEL/GGT5/KERA/LUM/OGN/OMD/PRELP/VCAN/CHST5/GGT6/GS  
TA1/GSTA2/GSTA3 17

GO:0071333 BP cellular response to glucose stimulus 12/1105 123/16241 0.131838478  
0.387083445 0.310154509  
ADCY5/CMA1/EPHA5/GRIK5/KCNB1/PTPRN/SERPINF1/FOXA2/MLXIPL/NEUROD1/PCK1/RFX  
6 12

GO:0002823 BP negative regulation of adaptive immune response based on somatic  
recombination of immune receptors built from immunoglobulin superfamily domains 5/1105  
40/162410.13313194 0.389630337 0.312195232 CLEC4G/CR1/FCGR2B/PTPRC/C4BPB

GO:0048255 BP mRNA stabilization 5/1105 40/162410.13313194 0.389630337  
0.312195232 DAZL/RBM24/VIP/APOBEC1/IGF2BP1 5

GO:0051281 BP positive regulation of release of sequestered calcium ion into cytosol 5/1105  
40/162410.13313194 0.389630337 0.312195232 CASQ1/CXCL9/JPH2/THY1/F2 5

GO:0071526 BP semaphorin-plexin signaling pathway 5/1105 40/162410.13313194  
0.389630337 0.312195232 FLNA/HAND2/NCAM1/NRP2/PLXNA4 5

GO:0071548 BP response to dexamethasone 5/1105 40/162410.13313194 0.389630337  
0.312195232 AGTR2/SERPINF1/ABCC2/EPO/PCK1 5

GO:0048863 BP stem cell differentiation 22/1105 251/16241 0.133220311 0.389630337  
0.312195232  
A2M/ANXA6/BCHE/EDNRA/FN1/FRZB/GPM6A/GREM1/HAND2/LMO1/MYOC/NRP2/PRICK  
LE1/PTPRC/RBM24/SFRP1/SOX10/ZEB2/BMP7/FOLR1/POU6F2/SIX3 22

GO:0017015 BP regulation of transforming growth factor beta receptor signaling pathway  
11/1105 111/16241 0.133913576 0.389630337 0.312195232  
ASPN/EMILIN1/FBN1/HTRA3/LTBP1/MYOC/TGFB1I1/TGFB3/THBS1/FOLR1/IL17F 11

GO:0034763 BP negative regulation of transmembrane transport 11/1105 111/16241  
0.133913576 0.389630337 0.312195232  
ACTN2/ATP1A2/CASQ2/KCNE4/PLN/PRKCB/RGS4/THBS1/TLR9/EPO/PCSK9 11

GO:0001502 BP cartilage condensation 3/1105 19/162410.135164922 0.389630337  
0.312195232 COL11A1/MGP/ROR2 3

GO:0002115 BP store-operated calcium entry 3/1105 19/162410.135164922 0.389630337  
0.312195232 CASQ1/JPH4/MS4A1 3

GO:0002544 BP chronic inflammatory response 3/1105 19/162410.135164922  
0.389630337 0.312195232 CXCL13/THBS1/VCAM1 3

GO:0002710 BP negative regulation of T cell mediated immunity 3/1105 19/16241  
0.135164922 0.389630337 0.312195232 CLEC4G/FCGR2B/PTPRC 3

GO:0003215 BP cardiac right ventricle morphogenesis 3/1105 19/162410.135164922  
0.389630337 0.312195232 HAND2/ZFPM2/FOXH1 3

GO:0010544 BP negative regulation of platelet activation 3/1105 19/162410.135164922  
0.389630337 0.312195232 APOE/F2/FGG 3

GO:0010738 BP regulation of protein kinase A signaling 3/1105 19/162410.135164922  
0.389630337 0.312195232 ADIPOQ/AKAP12/ADGRV1 3

GO:0016048 BP detection of temperature stimulus 3/1105 19/162410.135164922  
0.389630337 0.312195232 CXCL12/HTR2A/PRDM12 3

GO:0017000 BP antibiotic biosynthetic process 3/1105 19/162410.135164922  
0.389630337 0.312195232 CYBB/DUOX2/DUOXA2 3

GO:0032288 BP myelin assembly 3/1105 19/162410.135164922 0.389630337  
0.312195232 ANK2/NFASC/TENM4 3

GO:0045723 BP positive regulation of fatty acid biosynthetic process 3/1105 19/16241  
0.135164922 0.389630337 0.312195232 APOA4/APOA5/MLXIPL 3

GO:0046641 BP positive regulation of alpha-beta T cell proliferation 3/1105 19/16241  
0.135164922 0.389630337 0.312195232 CCR2/IL12B/PTPRC 3

GO:0048670 BP regulation of collateral sprouting 3/1105 19/162410.135164922

0.389630337 0.312195232 EPHA7/NGF/PTPRS 3  
 GO:0060219 BP camera-type eye photoreceptor cell differentiation 3/1105 19/16241  
 0.135164922 0.389630337 0.312195232 RORB/THY1/IHH 3  
 GO:0060231 BP mesenchymal to epithelial transition 3/1105 19/16241.135164922  
 0.389630337 0.312195232 SIX2/WNT9B/SALL13  
 GO:0072074 BP kidney mesenchyme development 3/1105 19/16241.135164922  
 0.389630337 0.312195232 PDGFRB/SIX2/BMP7 3  
 GO:0072087 BP renal vesicle development 3/1105 19/16241.135164922 0.389630337  
 0.312195232 SIX2/WNT9B/SALL13  
 GO:0098581 BP detection of external biotic stimulus 3/1105 19/16241.135164922  
 0.389630337 0.312195232 SSC5D/PGLYRP3/PGLYRP4 3  
 GO:0101023 BP vascular endothelial cell proliferation 3/1105 19/16241.135164922  
 0.389630337 0.312195232 AKT3/FGF2/FGFR1 3  
 GO:1901017 BP negative regulation of potassium ion transmembrane transporter activity  
 3/1105 19/16241.135164922 0.389630337 0.312195232 ACTN2/CASQ2/KCNE4 3  
 GO:1905562 BP regulation of vascular endothelial cell proliferation 3/1105 19/16241  
 0.135164922 0.389630337 0.312195232 AKT3/FGF2/FGFR1 3  
 GO:2000696 BP regulation of epithelial cell differentiation involved in kidney development  
 3/1105 19/16241.135164922 0.389630337 0.312195232 ADIPOQ/WNT9B/WWTR1  
 3  
 GO:2000727 BP positive regulation of cardiac muscle cell differentiation 3/1105  
 19/16241.135164922 0.389630337 0.312195232 GREM1/IGF1/MYOC 3  
 GO:0045921 BP positive regulation of exocytosis 9/1105 87/16241.136496282  
 0.393237384 0.315085414 CACNA1G/CNR1/ITGB2/KCNB1/NLGN1/SYT4/FGA/FGB/FGG  
 9  
 GO:0043406 BP positive regulation of MAP kinase activity 22/1105 252/16241  
 0.137133087 0.3948404 0.316369847  
 ALK/CARTPT/CCL19/DKK1/ELANE/FGF10/FGF2/FGFR1/FLT3/GHR/HTR2A/IGF1/NGF/NRK/PD  
 GFRB/PTPRC/ROR2/TGFB3/THBS1/TLR9/ZEB2/CXCL17 22  
 GO:0051897 BP positive regulation of protein kinase B signaling 15/1105 162/16241  
 0.138702363 0.399124786 0.319802754  
 AXL/CCL19/CCL21/CCR7/FGF10/FGF2/FGF5/FGF7/FGFR1/IGFBP5/MYOC/P2RY12/PDGFRB/T  
 HBS1/FGF23 15  
 GO:0035690 BP cellular response to drug 29/1105 345/16241 0.139436628  
 0.401002761 0.321307501  
 ADCY2/ADCY5/ADIPOQ/AGTR2/AXL/CASQ2/CHRM2/CHRNA3/CYBB/CYP1B1/FOLR2/KCNMB  
 1/P2RY12/SERPINF1/SFRP1/SLC8A1/SLIT2/SOX10/VIM/ABCC2/DDC/FABP1/FOLR1/LCN2/MMP3/  
 P2RX3/PCK1/REN/UGT1A1 29  
 GO:0010043 BP response to zinc ion 6/1105 52/16241.140055357 0.401640768  
 0.321818711 KCNK3/PLN/VCAM1/APOBEC1/OTC/ZACN 6  
 GO:0045620 BP negative regulation of lymphocyte differentiation 6/1105 52/16241  
 0.140055357 0.401640768 0.321818711 FGL2/GLI3/SFRP1/IHH/PGLYRP3/PGLYRP4 6  
 GO:0071320 BP cellular response to cAMP 6/1105 52/16241.140055357 0.401640768  
 0.321818711 ADIPOQ/IGFBP5/PENK/SLC8A1/PCK1/SLC26A3 6

GO:1903307 BP positive regulation of regulated secretory pathway 6/1105 52/16241  
0.140055357 0.401640768 0.321818711 CACNA1G/CNR1/ITGB2/KCNB1/NLGN1/SYT4  
6

GO:0045216 BP cell-cell junction organization 14/1105 150/16241 0.142266673  
0.401640768 0.321818711  
ANK2/CDH10/CDH11/CDH19/CDH2/CSF1R/HEG1/LIMS2/NFASC/PECAM1/TGFB3/CDH17/CL  
DN9/DSG1 14

GO:0046888 BP negative regulation of hormone secretion 7/1105 64/162410.143166177  
0.401640768 0.321818711 ADIPOQ/CARTPT/KCNB1/SFRP1/TACR2/FGF23/NPFF 7

GO:0048663 BP neuron fate commitment 7/1105 64/162410.143166177 0.401640768  
0.321818711 GLI2/GLI3/PRRX1/ATOH1/EVX1/IHH/NKX6-2 7

GO:0060420 BP regulation of heart growth 7/1105 64/162410.143166177 0.401640768  
0.321818711 FGF2/FGFR1/IGF1/KCNK2/PI16/RGS4/ZFPM2 7

GO:0150076 BP neuroinflammatory response 7/1105 64/162410.143166177 0.401640768  
0.321818711 C1QA/IGF1/ITGB2/PTPRC/TLR7/TLR8/MMP3 7

GO:0009855 BP determination of bilateral symmetry 12/1105 125/16241 0.143294614  
0.401640768 0.321818711  
ARMC4/BICC1/FGF10/GREM1/GREM2/HAND2/NKX3-2/RIPPLY2/FOLR1/FOXH1/IHH/NOTO  
12

GO:0071331 BP cellular response to hexose stimulus 12/1105 125/16241 0.143294614  
0.401640768 0.321818711  
ADCY5/CMA1/EPHA5/GRIK5/KCNB1/PTPRN/SERPINF1/FOXA2/MLXIPL/NEUROD1/PCK1/RFX  
6 12

GO:0032231 BP regulation of actin filament bundle assembly 9/1105 88/16241  
0.143473529 0.401640768 0.321818711  
FLNA/MYOC/SFRP1/SHANK1/SYNPO2/TAC1/TGFB3/TMEFF2/APOA1 9

GO:0030857 BP negative regulation of epithelial cell differentiation 5/1105 41/16241  
0.143673533 0.401640768 0.321818711 FRZB/S1PR3/REG3A/REG3G/XDH 5

GO:0048286 BP lung alveolus development 5/1105 41/162410.143673533 0.401640768  
0.321818711 FGF10/FOXP2/IGFBP5/MYOC/TGFB3 5

GO:0097028 BP dendritic cell differentiation 5/1105 41/162410.143673533 0.401640768  
0.321818711 AXL/CCL19/CCR7/FCGR2B/FLT3 5

GO:0006658 BP phosphatidylserine metabolic process 4/1105 30/162410.143790428  
0.401640768 0.321818711 PLA2G2D/PLA2G2F/PLA2G4E/PLA2G4F 4

GO:0010831 BP positive regulation of myotube differentiation 4/1105 30/16241  
0.143790428 0.401640768 0.321818711 CXCL9/EHD2/RBM24/SMYD1 4

GO:0035909 BP aorta morphogenesis 4/1105 30/162410.143790428 0.401640768  
0.321818711 COL3A1/MYLK/PDGFRB/FOXH1 4

GO:0042533 BP tumor necrosis factor biosynthetic process 4/1105 30/162410.143790428  
0.401640768 0.321818711 AKAP12/CCR2/CYBB/THBS1 4

GO:0042534 BP regulation of tumor necrosis factor biosynthetic process 4/1105  
30/162410.143790428 0.401640768 0.321818711 AKAP12/CCR2/CYBB/THBS1 4

GO:0050482 BP arachidonic acid secretion 4/1105 30/162410.143790428 0.401640768  
0.321818711 PLA2G2D/PLA2G12B/PLA2G2F/PLA2G4F 4

GO:0060251 BP regulation of glial cell proliferation 4/1105 30/162410.143790428  
0.401640768 0.321818711 ADCYAP1/SOX10/ASCL2/TERT4

GO:0071549 BP cellular response to dexamethasone stimulus 4/1105 30/16241  
0.143790428 0.401640768 0.321818711 AGTR2/SERPINF1/ABCC2/PCK1 4

GO:1903963 BP arachidonate transport 4/1105 30/162410.143790428 0.401640768  
0.321818711 PLA2G2D/PLA2G12B/PLA2G2F/PLA2G4F 4

GO:2000778 BP positive regulation of interleukin-6 secretion 4/1105 30/16241  
0.143790428 0.401640768 0.321818711 C1QTNF4/TLR8/IL17A/IL17F 4

GO:0007492 BP endoderm development 8/1105 76/162410.144023078 0.401640768  
0.321818711 COL11A1/COL5A1/COL6A1/COL8A1/DKK1/FN1/ITGB2/MMP2 8

GO:0070509 BP calcium ion import 8/1105 76/162410.144023078 0.401640768  
0.321818711 CACNA1G/CXCL12/MS4A1/PDGFRB/PLN/SLC8A1/ATP2C2/SEMG1 8

GO:0001660 BP fever generation 2/1105 10/162410.144809813 0.401640768  
0.321818711 CNR1/PTGER3 2

GO:0006002 BP fructose 6-phosphate metabolic process 2/1105 10/162410.144809813  
0.401640768 0.321818711 GFPT2/FBP2 2

GO:0006171 BP cAMP biosynthetic process 2/1105 10/162410.144809813 0.401640768  
0.321818711 ADCY2/ADCY5 2

GO:0006570 BP tyrosine metabolic process 2/1105 10/162410.144809813 0.401640768  
0.321818711 IYD/PAH 2

GO:0008343 BP adult feeding behavior 2/1105 10/162410.144809813 0.401640768  
0.321818711 CARTPT/NPY 2

GO:0021562 BP vestibulocochlear nerve development 2/1105 10/162410.144809813  
0.401640768 0.321818711 NRP2/TIFAB 2

GO:0021936 BP regulation of cerebellar granule cell precursor proliferation 2/1105  
10/162410.144809813 0.401640768 0.321818711 GLI2/LHX5 2

GO:0030647 BP aminoglycoside antibiotic metabolic process 2/1105 10/162410.144809813  
0.401640768 0.321818711 AKR1B10/AKR1C4 2

GO:0032275 BP luteinizing hormone secretion 2/1105 10/162410.144809813  
0.401640768 0.321818711 TACR2/KISS1 2

GO:0032966 BP negative regulation of collagen biosynthetic process 2/1105 10/16241  
0.144809813 0.401640768 0.321818711 EMILIN1/NPPC 2

GO:0034115 BP negative regulation of heterotypic cell-cell adhesion 2/1105 10/16241  
0.144809813 0.401640768 0.321818711 ADIPOQ/APOA1 2

GO:0035878 BP nail development 2/1105 10/162410.144809813 0.401640768  
0.321818711 FOXN1/HOXC13 2

GO:0042415 BP norepinephrine metabolic process 2/1105 10/162410.144809813  
0.401640768 0.321818711 HAND2/MOXD1 2

GO:0042756 BP drinking behavior 2/1105 10/162410.144809813 0.401640768  
0.321818711 EN1/REN 2

GO:0042758 BP long-chain fatty acid catabolic process 2/1105 10/162410.144809813  
0.401640768 0.321818711 ADTRP/CYP4F2 2

GO:0043084 BP penile erection 2/1105 10/162410.144809813 0.401640768  
0.321818711 CNR1/VIP2

GO:0043379 BP memory T cell differentiation 2/1105 10/162410.144809813 0.401640768  
0.321818711 FGL2/IL12B 2

GO:0046929 BP negative regulation of neurotransmitter secretion 2/1105 10/16241  
0.144809813 0.401640768 0.321818711 SYT11/SYT4 2

GO:0048262 BP determination of dorsal/ventral asymmetry 2/1105 10/162410.144809813  
0.401640768 0.321818711 GREM1/GREM2 2

GO:0060768 BP regulation of epithelial cell proliferation involved in prostate gland  
development 2/1105 10/162410.144809813 0.401640768 0.321818711 AR/SERPINF1 2

GO:0061052 BP negative regulation of cell growth involved in cardiac muscle cell  
development 2/1105 10/162410.144809813 0.401640768 0.321818711 PI16/RGS4 2

GO:0070099 BP regulation of chemokine-mediated signaling pathway 2/1105 10/16241  
0.144809813 0.401640768 0.321818711 SLIT2/SLIT3 2

GO:0070472 BP regulation of uterine smooth muscle contraction 2/1105 10/16241  
0.144809813 0.401640768 0.321818711 TACR1/TACR2 2

GO:0070587 BP regulation of cell-cell adhesion involved in gastrulation 2/1105  
10/162410.144809813 0.401640768 0.321818711 ADIPOQ/APOA1 2

GO:0071313 BP cellular response to caffeine 2/1105 10/162410.144809813 0.401640768  
0.321818711 CASQ2/SLC8A1 2

GO:0072110 BP glomerular mesangial cell proliferation 2/1105 10/162410.144809813  
0.401640768 0.321818711 PDGFRB/BMP7 2

GO:0072203 BP cell proliferation involved in metanephros development 2/1105  
10/162410.144809813 0.401640768 0.321818711 PDGFRB/BMP7 2

GO:0090715 BP immunological memory formation process 2/1105 10/162410.144809813  
0.401640768 0.321818711 FGL2/IL12B 2

GO:0097105 BP presynaptic membrane assembly 2/1105 10/162410.144809813  
0.401640768 0.321818711 NLGN1/CEL 2

GO:1901894 BP regulation of calcium-transporting ATPase activity 2/1105 10/16241  
0.144809813 0.401640768 0.321818711 PLN/TLR92

GO:1902414 BP protein localization to cell junction 2/1105 10/162410.144809813  
0.401640768 0.321818711 FLNA/HEG1 2

GO:1902805 BP positive regulation of synaptic vesicle transport 2/1105 10/16241  
0.144809813 0.401640768 0.321818711 CNR1/NLGN1 2

GO:1903789 BP regulation of amino acid transmembrane transport 2/1105 10/16241  
0.144809813 0.401640768 0.321818711 ATP1A2/RGS4 2

GO:2000121 BP regulation of removal of superoxide radicals 2/1105 10/162410.144809813  
0.401640768 0.321818711 FBLN5/BMP7 2

GO:2000833 BP positive regulation of steroid hormone secretion 2/1105 10/16241  
0.144809813 0.401640768 0.321818711 RETN/TAC1 2

GO:2001054 BP negative regulation of mesenchymal cell apoptotic process 2/1105  
10/162410.144809813 0.401640768 0.321818711 GDF5/BMP7 2

GO:0048638 BP regulation of developmental growth 27/1105 320/16241 0.145016977  
0.401988369 0.32209723  
APOE/AR/CACNG7/CXCL12/EPHA7/FGF2/FGFR1/FN1/GDF5/GHR/IGF1/KCNK2/MAG/NGF/N  
PPC/NPY1R/NRK/PI16/PLXNA4/PTPRS/RGS4/SFRP1/SFRP2/SYT4/TNR/ZFPM2/REG1A 27

GO:0006814 BP sodium ion transport 19/1105 215/16241 0.145958494 0.404370062  
0.324005585  
ATP1A2/ATP1A4/CNTN1/FXYD6/NALCN/NETO1/SCN11A/SCN2B/SCN7A/SLC12A3/SLC8A1/FX  
YD4/PCSK9/SLC10A5/SLC13A2/SLC17A4/SLC34A3/SLC9A2/TRPM5 19

GO:1903844 BP regulation of cellular response to transforming growth factor beta stimulus  
11/1105 113/16241 0.146144037 0.404655869 0.324234591  
ASPN/EMILIN1/FBN1/HTRA3/LTBP1/MYOCD/TGFB1I1/TGFB3/THBS1/FOLR1/IL17F 11

GO:0046545 BP development of primary female sexual characteristics 10/1105 101/16241  
0.148650502 0.410901106 0.32923865  
ADAMTS1/ADCYAP1/ADCYAP1R1/PCYT1B/PTPRN/RETN/SFRP1/SLIT2/SLIT3/ZFPM2 10

GO:0090100 BP positive regulation of transmembrane receptor protein serine/threonine  
kinase signaling pathway 10/1105 101/16241 0.148650502 0.410901106 0.32923865  
GDF10/GDF5/GDF6/MYOCD/RNF165/SULF1/TGFB1I1/TGFB3/THBS1/BMP7 10

GO:2001237 BP negative regulation of extrinsic apoptotic signaling pathway 10/1105  
101/16241 0.148650502 0.410901106 0.32923865  
AR/FGF10/IGF1/SERPINE1/SFRP2/THBS1/FGA/FGB/FGG/TERT 10

GO:0009799 BP specification of symmetry 12/1105 126/16241 0.149215779  
0.411768485 0.329933646  
ARMC4/BICC1/FGF10/GREM1/GREM2/HAND2/NKX3-2/RIPPLY2/FOLR1/FOXH1/IHH/NOTO  
12

GO:0071326 BP cellular response to monosaccharide stimulus 12/1105 126/16241  
0.149215779 0.411768485 0.329933646  
ADCY5/CMA1/EPHA5/GRIK5/KCNB1/PTPRN/SERPINF1/FOXA2/MLXIPL/NEUROD1/PCK1/RFX  
6 12

GO:1902904 BP negative regulation of supramolecular fiber organization 12/1105  
126/16241 0.149215779 0.411768485 0.329933646  
ADD2/APOE/CLIP3/CRYAB/EMILIN1/LMOD1/MYOC/NAV3/SHANK1/SLIT2/STMN2/TMEFF2  
12

GO:0002090 BP regulation of receptor internalization 6/1105 53/16241 0.149451587  
0.411956337 0.330084165 DKK1/GREM1/LRRTM1/RSPO1/SFRP4/PCSK9 6

GO:0035904 BP aorta development 6/1105 53/16241 0.149451587 0.411956337  
0.330084165 COL3A1/LTBP1/MYLK/PDGFRB/PRICKLE1/FOXH1 6

GO:0045665 BP negative regulation of neuron differentiation 19/1105 216/16241  
0.15045844 0.414350843 0.332002786  
APOE/DKK1/DPYSL3/EPHA7/GLI3/MAG/NGFR/NLGN1/PTPRS/RGMA/SLIT2/SPOCK1/STMN2/  
THY1/TNR/VIM/BMP7/NR2E1/SIX3 19

GO:0071219 BP cellular response to molecule of bacterial origin 18/1105 203/16241  
0.150488987 0.414350843 0.332002786  
AXL/BPI/CEBPE/CTSG/CXCL13/CXCL9/FCGR2B/IL12B/KLRK4-KLRK1/MRC1/SERPINE1/VIM/AB  
CC2/DEFA1/IL36G/IL36RN/IL37/LCN2 18

GO:2000117 BP negative regulation of cysteine-type endopeptidase activity 9/1105  
89/16241 0.150627745 0.41450055 0.33212274  
CRYAB/NGF/NGFR/SFRP2/THBS1/WNT9A/CARD18/FABP1/MAGEA3 9

GO:0002827 BP positive regulation of T-helper 1 type immune response 3/1105

20/162410.151421 0.415055777 0.332567621 CCL19/CCR2/IL12B 3  
 GO:0006071 BP glycerol metabolic process 3/1105 20/162410.151421 0.415055777  
 0.332567621 MOGAT2/MOGAT3/PCK1 3  
 GO:0060039 BP pericardium development 3/1105 20/162410.151421 0.415055777  
 0.332567621 HAND2/HEG1/BMP7 3  
 GO:0060575 BP intestinal epithelial cell differentiation 3/1105 20/162410.151421  
 0.415055777 0.332567621 NKX3-2/NPY/CDX2 3  
 GO:0090050 BP positive regulation of cell migration involved in sprouting angiogenesis  
 3/1105 20/162410.151421 0.415055777 0.332567621 AKT3/FGF2/FGFBP1 3  
 GO:0090280 BP positive regulation of calcium ion import 3/1105 20/162410.151421  
 0.415055777 0.332567621 CXCL12/PDGFRB/ATP2C2 3  
 GO:0098743 BP cell aggregation 3/1105 20/162410.151421 0.415055777 0.332567621  
 COL11A1/MGP/ROR2 3  
 GO:0031016 BP pancreas development 8/1105 77/162410.151787186 0.415595684  
 0.333000227 FGF10/NKX3-2/FOXA2/IHH/NEUROD1/NKX6-2/PAX4/RFX6 8  
 GO:0046889 BP positive regulation of lipid biosynthetic process 8/1105 77/16241  
 0.151787186 0.415595684 0.333000227  
 APOE/HTR2A/SORBS1/APOA1/APOA4/APOA5/HTR2C/MLXIPL 8  
 GO:0006909 BP phagocytosis 22/1105 256/16241 0.153446443 0.419904695  
 0.336452866  
 ADIPOQ/AXL/CEACAM4/CEBPE/COLEC12/ELANE/FCGR2B/FCGR3A/FCN1/ITGB2/PECAM1/PL  
 D4/PTPRC/RAB31/SYT11/THBS1/TUB/WIPF1/XKR4/APOA1/APOA2/C4BPB22  
 GO:0007269 BP neurotransmitter secretion 15/1105 165/16241 0.154163006  
 0.420846187 0.337207246  
 CAMK2A/CHAT/CHRM2/CHRNA3/CHRNA6/CNR1/GRIK5/HTR2A/NLGN1/NRXN2/PRKCB/SLC1  
 8A3/SYT11/SYT4/TACR2 15  
 GO:0048732 BP gland development 35/1105 430/16241 0.154346806 0.420846187  
 0.337207246  
 ADCYAP1/AR/CDO1/CSF1R/CYP7B1/FGF10/FGF7/FGFR1/FRZB/GLI2/GLI3/HAND2/IGFBP5/LI  
 MS2/NRG3/SERPINF1/SFRP1/SOX10/SULF1/TGFB3/TNC/APOA1/ATP2C2/BMP7/FOXN1/HOXB13/I  
 HH/OTC/PCK1/PCSK9/REG1A/SALL1/SIX3/UGT1A1/XDH 35  
 GO:0007019 BP microtubule depolymerization 5/1105 42/162410.154561588  
 0.420846187 0.337207246 MAP1A/NAV3/STMN2/STMN4/STMND1 5  
 GO:0007212 BP dopamine receptor signaling pathway 5/1105 42/162410.154561588  
 0.420846187 0.337207246 ADCY5/ALK/FLNA/GNAO1/RGS4 5  
 GO:0010828 BP positive regulation of glucose transmembrane transport 5/1105  
 42/162410.154561588 0.420846187 0.337207246 ADIPOQ/CLIP3/IGF1/SORBS1/TERT  
 5  
 GO:0021983 BP pituitary gland development 5/1105 42/162410.154561588 0.420846187  
 0.337207246 ADCYAP1/FGF10/GLI2/SALL1/SIX3 5  
 GO:0032715 BP negative regulation of interleukin-6 production 5/1105 42/16241  
 0.154561588 0.420846187 0.337207246 BPI/SYT11/TLR9/IL36RN/ORM1 5  
 GO:0050850 BP positive regulation of calcium-mediated signaling 5/1105 42/16241  
 0.154561588 0.420846187 0.337207246 IGF1/JPH2/P2RX2/CHP2/P2RX3 5

GO:1903115 BP regulation of actin filament-based movement 5/1105 42/16241  
 0.154561588 0.420846187 0.337207246 ANK2/ATP1A2/CTNNA3/FLNA/PLN5  
 GO:0034341 BP response to interferon-gamma 17/1105 191/16241 0.155166077  
 0.422258045 0.338338511  
 CAMK2A/CCL13/CCL14/CCL19/CCL21/HLA-DPA1/HLA-DPB1/HLA-DQA1/HLA-DQA2/HLA-DQ  
 B2/IL12B/MRC1/NCAM1/VCAM1/VIM/CCL15/CCL20 17  
 GO:0001914 BP regulation of T cell mediated cytotoxicity 4/1105 31/162410.156770708  
 0.424976666 0.340516834 CD1C/FCGR2B/IL12B/PTPRC 4  
 GO:0003401 BP axis elongation 4/1105 31/162410.156770708 0.424976666  
 0.340516834 FGF10/SFRP1/SFRP2/TNC 4  
 GO:0030431 BP sleep 4/1105 31/162410.156770708 0.424976666 0.340516834  
 HTR2A/KCNA2/PTGDR/PTGDS 4  
 GO:0033198 BP response to ATP 4/1105 31/162410.156770708 0.424976666  
 0.340516834 P2RX2/P2RY12/SLC8A1/P2RX3 4  
 GO:0045907 BP positive regulation of vasoconstriction 4/1105 31/162410.156770708  
 0.424976666 0.340516834 HTR2A/FGA/FGB/FGG 4  
 GO:0061036 BP positive regulation of cartilage development4/1105 31/162410.156770708  
 0.424976666 0.340516834 GDF5/GDF6/GLI3/HOXA11 4  
 GO:1903393 BP positive regulation of adherens junction organization 4/1105 31/16241  
 0.156770708 0.424976666 0.340516834 MYOC/SFRP1/THY1/HRG 4  
 GO:0032652 BP regulation of interleukin-1 production 9/1105 90/162410.157955151  
 0.427479726 0.342522436 CCL19/CCR7/IGF1/S1PR3/TLR8/APOA1/CARD18/ORM1/ORM2  
 9  
 GO:0034333 BP adherens junction assembly 9/1105 90/162410.157955151 0.427479726  
 0.342522436 ACTN2/EPHA3/FERMT2/MYOC/SFRP1/SORBS1/THBS1/THY1/HRG 9  
 GO:0046849 BP bone remodeling 9/1105 90/162410.157955151 0.427479726  
 0.342522436 CARTPT/CSF1R/GDF5/GREM1/SFRP1/TGFB3/TMEM119/EFNA2/IHH 9  
 GO:0001912 BP positive regulation of leukocyte mediated cytotoxicity 6/1105 54/16241  
 0.159122234 0.429455171 0.344105281 CD1C/CRTAM/IL12B/IL21/KLRC4-KLRK1/PTPRC  
 6  
 GO:0021515 BP cell differentiation in spinal cord 6/1105 54/162410.159122234  
 0.429455171 0.344105281 GLI2/GLI3/PHOX2A/EVX1/LHX5/NKX6-2 6  
 GO:0032768 BP regulation of monooxygenase activity 6/1105 54/162410.159122234  
 0.429455171 0.344105281 AGTR2/APOE/CNR1/FCER2/NPR3/TERT 6  
 GO:0050879 BP multicellular organismal movement 6/1105 54/162410.159122234  
 0.429455171 0.344105281 CASQ1/COMP/MAP1A/STAC/SYNM/TNNT3 6  
 GO:0050881 BP musculoskeletal movement 6/1105 54/162410.159122234 0.429455171  
 0.344105281 CASQ1/COMP/MAP1A/STAC/SYNM/TNNT3 6  
 GO:0015849 BP organic acid transport 27/1105 324/16241 0.159919081 0.431132012  
 0.345448867  
 AGTR2/APOE/ATP1A2/FABP4/FOLR2/NPY5R/NTRK2/PLA2G2D/RGS4/SLC6A17/SPX/SYT4/TH  
 BS1/ABCC2/AGXT/AKR1C4/CYP4F2/FABP1/FOLR1/LCN12/PLA2G12B/PLA2G2F/PLA2G4F/SLC13A2  
 /SLC17A4/SLC26A3/SLC6A7 27  
 GO:0046942 BP carboxylic acid transport27/1105 324/16241 0.159919081 0.431132012

0.345448867  
 AGTR2/APOE/ATP1A2/FABP4/FOLR2/NPY5R/NTRK2/PLA2G2D/RGS4/SLC6A17/SPX/SYT4/TH  
 BS1/ABCC2/AGXT/AKR1C4/CYP4F2/FABP1/FOLR1/LCN12/PLA2G12B/PLA2G2F/PLA2G4F/SLC13A2  
 /SLC17A4/SLC26A3/SLC6A7 27  
 GO:0006575 BP cellular modified amino acid metabolic process 17/1105 192/16241  
 0.160141333 0.431494364 0.345739205  
 BHMT2/FOLR2/GGT5/PLA2G2D/TPO/DUOX2/DUOXA2/FOLR1/GGT6/GSTA1/GSTA2/GSTA3/I  
 YD/PLA2G2F/PLA2G4E/PLA2G4F/VNN3 17  
 GO:0050909 BP sensory perception of taste 7/1105 66/162410.160386219 0.431917274  
 0.346078066 CST2/P2RX2/REEP2/RTP5/P2RX3/TAS2R38/TRPM5 7  
 GO:0042157 BP lipoprotein metabolic process 12/1105 128/16241 0.161435193  
 0.434503928 0.348150649  
 APOE/CLIP3/APOA1/APOA2/APOA4/APOA5/APOBEC1/APOC3/MTTP/PCSK9/ZDHHC11/ZDHH  
 C11B 12  
 GO:0006979 BP response to oxidative stress 34/1105 419/16241 0.162744274  
 0.437787444 0.350781599  
 ADIPOQ/ANGPTL7/APOE/AXL/CCL19/CCR7/COL1A1/CRYAB/CYBB/CYP1B1/FBLN5/GNAO1/K  
 CNA5/KRT1/MMP2/MPO/MSRB3/NME8/PDGFRB/PENK/PTPRN/SLC8A1/SOD3/TPO/ABCC2/APOA  
 4/BMP7/DUOX2/FABP1/LCN2/MMP3/NOX1/S100A7/SCGB1A1 34  
 GO:0007605 BP sensory perception of sound 13/1105 141/16241 0.163169148  
 0.438078414 0.351014741  
 ATP2B2/COL11A1/COL1A1/COL4A3/EPYC/FGFR1/GABRA5/P2RX2/TUB/ADGRV1/GJC3/MYO1  
 A/USH1G 13  
 GO:0002758 BP innate immune response-activating signal transduction 24/1105  
 285/16241 0.163967622 0.438078414 0.351014741  
 CLEC10A/CLEC4C/CLEC6A/COLEC12/FCN1/ITGB2/KLRC4-KLRK1/LILRA4/PTPRS/TLR7/TLR8/TL  
 R9/DMBT1/FGA/FGB/FGG/MUC15/MUC17/MUC21/MUC4/PGLYRP3/PGLYRP4/REG3G/S100A14  
 24  
 GO:0001938 BP positive regulation of endothelial cell proliferation 9/1105 91/16241  
 0.165451682 0.438078414 0.351014741  
 AGTR1/AKT3/CXCL12/FGF2/FGFR1/NRP2/THBS4/VIP/FGFBP1 9  
 GO:0001774 BP microglial cell activation 5/1105 43/162410.16577857 0.438078414  
 0.351014741 C1QA/ITGB2/PTPRC/TLR7/TLR8 5  
 GO:0002269 BP leukocyte activation involved in inflammatory response 5/1105  
 43/162410.16577857 0.438078414 0.351014741 C1QA/ITGB2/PTPRC/TLR7/TLR8 5  
 GO:0006775 BP fat-soluble vitamin metabolic process 5/1105 43/162410.16577857  
 0.438078414 0.351014741 FGFR1/CYP3A4/CYP4F2/FGF23/RBP2 5  
 GO:0032873 BP negative regulation of stress-activated MAPK cascade 5/1105 43/16241  
 0.16577857 0.438078414 0.351014741 DACT1/SFRP1/SFRP2/AMBP/KLHL31 5  
 GO:0070303 BP negative regulation of stress-activated protein kinase signaling cascade  
 5/1105 43/162410.16577857 0.438078414 0.351014741  
 DACT1/SFRP1/SFRP2/AMBP/KLHL31 5  
 GO:1990573 BP potassium ion import across plasma membrane 5/1105 43/16241  
 0.16577857 0.438078414 0.351014741 ABCC9/ATP1A2/ATP1A4/KCNJ5/SLC12A3 5

GO:0016202 BP regulation of striated muscle tissue development 12/1105 129/16241  
0.16772933 0.438078414 0.351014741  
DKK1/FGF2/FGFR1/GREM1/IGF1/JPH2/KCNK2/MYOCD/PI16/RBM24/RGS4/ZFPM2 12

GO:0008652 BP cellular amino acid biosynthetic process 8/1105 79/162410.167900279  
0.438078414 0.351014741 BHMT2/CDO1/GADL1/AGXT/AGXT2/ASPG/OTC/PAH 8

GO:0001956 BP positive regulation of neurotransmitter secretion 3/1105 21/16241  
0.168256217 0.438078414 0.351014741 CNR1/NLGN1/TACR2 3

GO:0006067 BP ethanol metabolic process 3/1105 21/162410.168256217 0.438078414  
0.351014741 ADH1B/ADH7/SULT2A1 3

GO:0042749 BP regulation of circadian sleep/wake cycle 3/1105 21/162410.168256217  
0.438078414 0.351014741 KCNA2/NLGN1/PTGDS 3

GO:0045606 BP positive regulation of epidermal cell differentiation 3/1105 21/16241  
0.168256217 0.438078414 0.351014741 PTCH2/SFRP4/ATOH1 3

GO:0045649 BP regulation of macrophage differentiation 3/1105 21/162410.168256217  
0.438078414 0.351014741 ADIPOQ/C1QC/ROR2 3

GO:0050995 BP negative regulation of lipid catabolic process 3/1105 21/16241  
0.168256217 0.438078414 0.351014741 CNR1/APOA2/APOC3 3

GO:0051589 BP negative regulation of neurotransmitter transport 3/1105 21/16241  
0.168256217 0.438078414 0.351014741 RGS4/SYT11/SYT4 3

GO:1901685 BP glutathione derivative metabolic process 3/1105 21/162410.168256217  
0.438078414 0.351014741 GSTA1/GSTA2/GSTA3 3

GO:1901687 BP glutathione derivative biosynthetic process 3/1105 21/162410.168256217  
0.438078414 0.351014741 GSTA1/GSTA2/GSTA3 3

GO:1903861 BP positive regulation of dendrite extension 3/1105 21/162410.168256217  
0.438078414 0.351014741 CACNG7/SYT4/REG1A 3

GO:0019216 BP regulation of lipid metabolic process 31/1105 380/16241 0.168274382  
0.438078414 0.351014741  
ADIPOQ/AGTR1/APOE/CCL19/CCL21/CCR7/CNR1/DHH/FGF2/FLT3/GLIPR1/HTR2A/LGALS12/  
P2RY12/PDGFRB/SERPINA3/SORBS1/APOA1/APOA2/APOA4/APOA5/APOBEC1/APOC3/F2/FABP1/  
HTR2C/MLXIPL/SULT2A1/UGT1A1/UGT1A8/UGT1A9 31

GO:0045844 BP positive regulation of striated muscle tissue development 7/1105  
67/162410.169331546 0.438078414 0.351014741  
FGF2/FGFR1/GREM1/IGF1/MYOCD/RBM24/ZFPM2 7

GO:0048636 BP positive regulation of muscle organ development 7/1105 67/16241  
0.169331546 0.438078414 0.351014741  
FGF2/FGFR1/GREM1/IGF1/MYOCD/RBM24/ZFPM2 7

GO:0001574 BP ganglioside biosynthetic process 2/1105 11/162410.169364189  
0.438078414 0.351014741 ST8SIA2/ST8SIA6 2

GO:0001778 BP plasma membrane repair 2/1105 11/162410.169364189 0.438078414  
0.351014741 ANXA6/SYT11 2

GO:0001976 BP neurological system process involved in regulation of systemic arterial blood  
pressure 2/1105 11/162410.169364189 0.438078414 0.351014741 AGTR2/P2RX2 2

GO:0002638 BP negative regulation of immunoglobulin production 2/1105 11/16241  
0.169364189 0.438078414 0.351014741 CD22/FCGR2B 2

GO:0002887 BP negative regulation of myeloid leukocyte mediated immunity 2/1105  
11/162410.169364189 0.438078414 0.351014741 CCR2/FCGR2B 2

GO:0007195 BP adenylate cyclase-inhibiting dopamine receptor signaling pathway 2/1105  
11/162410.169364189 0.438078414 0.351014741 ADCY5/FLNA 2

GO:0010172 BP embryonic body morphogenesis 2/1105 11/162410.169364189  
0.438078414 0.351014741 GREM2/MAB21L2 2

GO:0010713 BP negative regulation of collagen metabolic process 2/1105 11/16241  
0.169364189 0.438078414 0.351014741 EMILIN1/NPPC 2

GO:0010988 BP regulation of low-density lipoprotein particle clearance 2/1105  
11/162410.169364189 0.438078414 0.351014741 APOC3/PCSK9 2

GO:0019371 BP cyclooxygenase pathway 2/1105 11/162410.169364189 0.438078414  
0.351014741 PTGDS/PTGIS 2

GO:0019532 BP oxalate transport 2/1105 11/162410.169364189 0.438078414  
0.351014741 AGXT/SLC26A3 2

GO:0031652 BP positive regulation of heat generation 2/1105 11/162410.169364189  
0.438078414 0.351014741 CNR1/PTGER3 2

GO:0032276 BP regulation of gonadotropin secretion 2/1105 11/162410.169364189  
0.438078414 0.351014741 TACR2/KISS1 2

GO:0032908 BP regulation of transforming growth factor beta1 production 2/1105  
11/162410.169364189 0.438078414 0.351014741 LUM/THBS1 2

GO:0033089 BP positive regulation of T cell differentiation in thymus 2/1105 11/16241  
0.169364189 0.438078414 0.351014741 GLI2/IHH 2

GO:0033234 BP negative regulation of protein sumoylation 2/1105 11/162410.169364189  
0.438078414 0.351014741 MAGEA2/MAGEA2B 2

GO:0033327 BP Leydig cell differentiation 2/1105 11/162410.169364189 0.438078414  
0.351014741 AR/DHH 2

GO:0034379 BP very-low-density lipoprotein particle assembly 2/1105 11/16241  
0.169364189 0.438078414 0.351014741 APOC3/MTTP 2

GO:0035627 BP ceramide transport 2/1105 11/162410.169364189 0.438078414  
0.351014741 GLTPD2/MTTP 2

GO:0042670 BP retinal cone cell differentiation 2/1105 11/162410.169364189  
0.438078414 0.351014741 RORB/THY1 2

GO:0043117 BP positive regulation of vascular permeability 2/1105 11/162410.169364189  
0.438078414 0.351014741 PDE3A/TACR2 2

GO:0046185 BP aldehyde catabolic process 2/1105 11/162410.169364189 0.438078414  
0.351014741 AGXT/AGXT2 2

GO:0046439 BP L-cysteine metabolic process 2/1105 11/162410.169364189 0.438078414  
0.351014741 CDO1/AGXT 2

GO:0046549 BP retinal cone cell development 2/1105 11/162410.169364189  
0.438078414 0.351014741 RORB/THY1 2

GO:0050910 BP detection of mechanical stimulus involved in sensory perception of sound  
2/1105 11/162410.169364189 0.438078414 0.351014741 COL11A1/ADGRV1 2

GO:0051673 BP membrane disruption in other organism 2/1105 11/162410.169364189  
0.438078414 0.351014741 MPEG1/DEFA12

GO:0060159 BP regulation of dopamine receptor signaling pathway 2/1105 11/16241  
 0.169364189 0.438078414 0.351014741 ALK/RGS4 2  
 GO:0060272 BP embryonic skeletal joint morphogenesis 2/1105 11/162410.169364189  
 0.438078414 0.351014741 BMP7/HOXA11 2  
 GO:0060525 BP prostate glandular acinus development 2/1105 11/162410.169364189  
 0.438078414 0.351014741 SFRP1/HOXB13 2  
 GO:0060767 BP epithelial cell proliferation involved in prostate gland development 2/1105  
 11/162410.169364189 0.438078414 0.351014741 AR/SERPINF1 2  
 GO:0061042 BP vascular wound healing 2/1105 11/162410.169364189 0.438078414  
 0.351014741 SERPINE1/SMOC2 2  
 GO:0070471 BP uterine smooth muscle contraction 2/1105 11/162410.169364189  
 0.438078414 0.351014741 TACR1/TACR2 2  
 GO:0070586 BP cell-cell adhesion involved in gastrulation 2/1105 11/162410.169364189  
 0.438078414 0.351014741 ADIPOQ/APOA1 2  
 GO:0090193 BP positive regulation of glomerulus development 2/1105 11/16241  
 0.169364189 0.438078414 0.351014741 ADIPOQ/AGTR2 2  
 GO:0090594 BP inflammatory response to wounding 2/1105 11/162410.169364189  
 0.438078414 0.351014741 CCR2/SIGLEC10 2  
 GO:0150079 BP negative regulation of neuroinflammatory response 2/1105 11/16241  
 0.169364189 0.438078414 0.351014741 IGF1/PTPRC 2  
 GO:1901077 BP regulation of relaxation of muscle 2/1105 11/162410.169364189  
 0.438078414 0.351014741 PLN/TIFAB 2  
 GO:1901387 BP positive regulation of voltage-gated calcium channel activity 2/1105  
 11/162410.169364189 0.438078414 0.351014741 FGF14/STAC 2  
 GO:1901678 BP iron coordination entity transport 2/1105 11/162410.169364189  
 0.438078414 0.351014741 HRG/LCN2 2  
 GO:1902563 BP regulation of neutrophil activation 2/1105 11/162410.169364189  
 0.438078414 0.351014741 FCGR2B/ITGB2 2  
 GO:1902950 BP regulation of dendritic spine maintenance 2/1105 11/162410.169364189  
 0.438078414 0.351014741 APOE/FCGR2B 2  
 GO:1904181 BP positive regulation of membrane depolarization 2/1105 11/16241  
 0.169364189 0.438078414 0.351014741 DCN/MYOC 2  
 GO:1904321 BP response to forskolin 2/1105 11/162410.169364189 0.438078414  
 0.351014741 ADCY2/ADCY5 2  
 GO:1904322 BP cellular response to forskolin 2/1105 11/162410.169364189 0.438078414  
 0.351014741 ADCY2/ADCY5 2  
 GO:1905941 BP positive regulation of gonad development 2/1105 11/162410.169364189  
 0.438078414 0.351014741 RETN/ZFPM2 2  
 GO:0019827 BP stem cell population maintenance 14/1105 155/16241 0.170072968  
 0.438078414 0.351014741  
 CDH2/FGF10/FGF2/FOXD3/PRRX1/SFRP1/SIX2/WNT9B/ASCL2/BMP7/CDX2/IGF2BP1/NR2E1  
 /SALL1 14  
 GO:0002717 BP positive regulation of natural killer cell mediated immunity 4/1105  
 32/162410.170165638 0.438078414 0.351014741 CRTAM/IL12B/IL21/KLRC4-KLRK1 4

GO:0008210 BP estrogen metabolic process 4/1105 32/162410.170165638 0.438078414  
0.351014741 CYP1B1/CYP3A4/HSD3B1/UGT1A14

GO:0010837 BP regulation of keratinocyte proliferation 4/1105 32/162410.170165638  
0.438078414 0.351014741 FGF10/FGF7/REG3A/REG3G 4

GO:0032814 BP regulation of natural killer cell activation 4/1105 32/162410.170165638  
0.438078414 0.351014741 AXL/IL12B/PGLYRP3/PGLYRP44

GO:0035115 BP embryonic forelimb morphogenesis 4/1105 32/162410.170165638  
0.438078414 0.351014741 EN1/RSP02/WNT9A/HOXA114

GO:0042744 BP hydrogen peroxide catabolic process 4/1105 32/162410.170165638  
0.438078414 0.351014741 MPO/TPO/APOA4/DUOX2 4

GO:0048854 BP brain morphogenesis 4/1105 32/162410.170165638 0.438078414  
0.351014741 AKT3/CDH2/SHANK1/EMX1 4

GO:0050718 BP positive regulation of interleukin-1 beta secretion 4/1105 32/16241  
0.170165638 0.438078414 0.351014741 CCL19/TLR8/ORM1/ORM2 4

GO:0055026 BP negative regulation of cardiac muscle tissue development 4/1105  
32/162410.170165638 0.438078414 0.351014741 DKK1/KCNK2/PI16/RGS44

GO:0061384 BP heart trabecula morphogenesis 4/1105 32/162410.170165638  
0.438078414 0.351014741 ADAMTS1/HEG1/BMP7/FOXH1 4

GO:0070050 BP neuron cellular homeostasis 4/1105 32/162410.170165638 0.438078414  
0.351014741 ATP2B2/CNR1/MAP1A/SLC6A2 4

GO:0098664 BP G protein-coupled serotonin receptor signaling pathway 4/1105  
32/162410.170165638 0.438078414 0.351014741 CHRM2/HTR2A/HTR7/HTR2C 4

GO:0014066 BP regulation of phosphatidylinositol 3-kinase signaling 11/1105 117/16241  
0.172267709 0.443257719 0.355164712  
DCN/FGFR1/FLT3/IGF1/MYOC/NTRK2/PDGFRB/RELN/SELP/EPO/F2 11

GO:0050764 BP regulation of phagocytosis 9/1105 92/162410.173112991 0.444966516  
0.356533902 ADIPOQ/FCGR2B/PTPRC/RAB31/SYT11/TUB/APOA1/APOA2/C4BPB 9

GO:0051341 BP regulation of oxidoreductase activity 9/1105 92/162410.173112991  
0.444966516 0.356533902 AGTR1/AGTR2/AOC3/APOE/CNR1/FCER2/NPR3/FGF23/TERT  
9

GO:0045137 BP development of primary sexual characteristics 19/1105 221/16241  
0.17408995 0.446913534 0.35809397  
ADAMTS1/ADCYAP1/ADCYAP1R1/AR/DHH/FLNA/PCYT1B/PDGFRB/PTPRN/RETN/SFRP1/SFRP  
2/SLIT2/SLIT3/UTF1/ZFPM2/HOXA11/REN/SALL1 19

GO:0001837 BP epithelial to mesenchymal transition 12/1105 130/16241 0.174143425  
0.446913534 0.35809397  
COL1A1/DACT3/EPHA3/GREM1/HEYL/SFRP1/SFRP2/TGFB11/TGFB3/WWTR1/BMP7/FOXA2  
12

GO:0009581 BP detection of external stimulus 12/1105 130/16241 0.174143425  
0.446913534 0.35809397  
COL11A1/CXCL12/GPR88/HTR2A/KCNA1/KCNK4/PHF24/ADGRV1/GNGT1/PRDM12/REEP6/R  
GR 12

GO:0007254 BP JNK cascade 18/1105 208/16241 0.174921007 0.448674667  
0.359505096

CCL19/CCL21/CCR7/DACT1/DKK1/FCGR2B/NRK/ROR2/SFRP1/SFRP2/TLR9/ZEB2/AMBP/IL36  
 G/IL36RN/IL37/KLHL31/NOX1 18  
 GO:0002706 BP regulation of lymphocyte mediated immunity 13/1105 143/16241  
 0.175316705 0.449220477 0.359942432  
 CCR2/CD1C/CLC/CLEC4G/CR1/CRTAM/FCER2/FCGR2B/IL12B/IL21/KLRC4-KLRK1/PTPRC/C4B  
 PB 13  
 GO:0032635 BP interleukin-6 production 13/1105 143/16241 0.175316705 0.449220477  
 0.359942432  
 ADCYAP1/BPI/C1QTNF4/SYT11/TLR7/TLR8/TLR9/IL17A/IL17F/IL36G/IL36RN/IL37/ORM1 13  
 GO:0034109 BP homotypic cell-cell adhesion 8/1105 80/162410.176237918 0.451345491  
 0.361645121 COMP/CTNNA3/FLNA/MYL9/P2RY12/FGA/FGB/FGG 8  
 GO:0001909 BP leukocyte mediated cytotoxicity 10/1105 105/16241 0.176708791  
 0.452315572 0.362422408  
 CD1C/CRTAM/CTSG/ELANE/FCGR2B/IL12B/IL21/KLRC4-KLRK1/PTPRC/F2 10  
 GO:0006195 BP purine nucleotide catabolic process 5/1105 44/162410.177306142  
 0.452430011 0.362514103 NT5C1A/NUDT10/NUDT11/GDA/XDH 5  
 GO:0021695 BP cerebellar cortex development 5/1105 44/162410.177306142  
 0.452430011 0.362514103 AGTR2/CBLN1/GLI2/SEZ6L/LHX5 5  
 GO:0043489 BP RNA stabilization 5/1105 44/162410.177306142 0.452430011  
 0.362514103 DAZL/RBM24/VIP/APOBEC1/IGF2BP1 5  
 GO:0044764 BP multi-organism cellular process 5/1105 44/162410.177306142  
 0.452430011 0.362514103 F2/HRG/PGLYRP3/PGLYRP4/REG3G 5  
 GO:0045599 BP negative regulation of fat cell differentiation 5/1105 44/162410.177306142  
 0.452430011 0.362514103 ADIPOQ/RUNX1T1/TGFB11/WWTR1/ZFPM2 5  
 GO:0050654 BP chondroitin sulfate proteoglycan metabolic process 5/1105 44/16241  
 0.177306142 0.452430011 0.362514103 BGN/DCN/DSEL/SPOCK3/VCAN 5  
 GO:0002709 BP regulation of T cell mediated immunity 7/1105 68/162410.17848974  
 0.454505757 0.364177315 CCR2/CD1C/CLC/CLEC4G/FCGR2B/IL12B/PTPRC 7  
 GO:0050771 BP negative regulation of axonogenesis 7/1105 68/162410.17848974  
 0.454505757 0.364177315 EPHA7/MAG/NGFR/PTPRS/SLIT2/THY1/TNR 7  
 GO:1901863 BP positive regulation of muscle tissue development 7/1105 68/16241  
 0.17848974 0.454505757 0.364177315  
 FGF2/FGFR1/GREM1/IGF1/MYOC/D/RBM24/ZFPM2 7  
 GO:2000243 BP positive regulation of reproductive process 7/1105 68/162410.17848974  
 0.454505757 0.364177315 AR/DAZL/PDE3A/RETN/VIP/ZFPM2/OVOL1 7  
 GO:0032355 BP response to estradiol 12/1105 131/16241 0.180675053 0.459777611  
 0.368401442  
 ADCYAP1R1/COL1A1/CRYAB/DHH/FGF10/PDGFRB/PENK/PTGFR/SFRP1/BMP7/IHH/UGT1A1  
 12  
 GO:0071222 BP cellular response to lipopolysaccharide 17/1105 196/16241 0.180875341  
 0.459777611 0.368401442  
 AXL/BPI/CEBPE/CTSG/CXCL13/CXCL9/IL12B/KLRC4-KLRK1/MRC1/SERPINE1/VIM/ABCC2/DEF  
 A1/IL36G/IL36RN/IL37/LCN2 17  
 GO:0015918 BP sterol transport 9/1105 93/162410.180934471 0.459777611

0.368401442 ADIPOQ/APOE/APOA1/APOA2/APOA4/APOA5/APOC3/CEL/PCSK9 9  
 GO:0090277 BP positive regulation of peptide hormone secretion 9/1105 93/16241  
 0.180934471 0.459777611 0.368401442  
 ADCYAP1/BLK/GRP/FGA/FGB/FGG/KISS1/RFX6/TFR2 9  
 GO:0015718 BP monocarboxylic acid transport 14/1105 157/16241 0.181913818  
 0.462027236 0.370203976  
 AGTR2/APOE/FABP4/PLA2G2D/SPX/THBS1/ABCC2/AKR1C4/CYP4F2/FABP1/LCN12/PLA2G12  
 B/PLA2G2F/PLA2G4F 14  
 GO:0010464 BP regulation of mesenchymal cell proliferation 4/1105 33/16241 0.183942274  
 0.464899053 0.372505048 FGFR1/FOXP2/PRRX1/IHH 4  
 GO:0048536 BP spleen development 4/1105 33/16241 0.183942274 0.464899053  
 0.372505048 BARX1/FGF10/NKX3-2/CDH17 4  
 GO:0051955 BP regulation of amino acid transport 4/1105 33/16241 0.183942274  
 0.464899053 0.372505048 ATP1A2/NPY5R/RGS4/SYT4 4  
 GO:0055023 BP positive regulation of cardiac muscle tissue growth 4/1105 33/16241  
 0.183942274 0.464899053 0.372505048 FGF2/FGFR1/IGF1/ZFPM2 4  
 GO:0060603 BP mammary gland duct morphogenesis 4/1105 33/16241 0.183942274  
 0.464899053 0.372505048 AR/CSF1R/FGF10/GLI2 4  
 GO:0071709 BP membrane assembly 4/1105 33/16241 0.183942274 0.464899053  
 0.372505048 CDH2/NLGN1/NRXN2/CEL 4  
 GO:0086005 BP ventricular cardiac muscle cell action potential 4/1105 33/16241  
 0.183942274 0.464899053 0.372505048 ANK2/CTNNA3/KCNE4/KCNJ54  
 GO:1901020 BP negative regulation of calcium ion transmembrane transporter activity  
 4/1105 33/16241 0.183942274 0.464899053 0.372505048 ATP1A2/CASQ2/PLN/TLR9  
 4  
 GO:1901890 BP positive regulation of cell junction assembly 4/1105 33/16241 0.183942274  
 0.464899053 0.372505048 MYOC/SFRP1/THY1/HRG 4  
 GO:0003279 BP cardiac septum development 10/1105 106/16241 0.184085639  
 0.464899053 0.372505048  
 ANK2/HEG1/HEY1/LTBP1/NRP2/SLIT2/SLIT3/ZFPM2/BMP7/SALL1 10  
 GO:0043200 BP response to amino acid 10/1105 106/16241 0.184085639 0.464899053  
 0.372505048 CDO1/COL1A1/COL1A2/COL3A1/COL6A1/CPEB1/CYBB/MMP2/NTRK2/PCK1  
 10  
 GO:0043154 BP negative regulation of cysteine-type endopeptidase activity involved in  
 apoptotic process 8/1105 81/16241 0.184754832 0.465134732 0.372693889  
 CRYAB/NGF/NGFR/SFRP2/THBS1/WNT9A/FABP1/MAGEA3 8  
 GO:0018230 BP peptidyl-L-cysteine S-palmitoylation 3/1105 22/16241 0.185599364  
 0.465134732 0.372693889 CLIP3/ZDHHC11/ZDHHC11B 3  
 GO:0018231 BP peptidyl-S-diacylglycerol-L-cysteine biosynthetic process from  
 peptidyl-cysteine 3/1105 22/16241 0.185599364 0.465134732 0.372693889  
 CLIP3/ZDHHC11/ZDHHC11B 3  
 GO:0032232 BP negative regulation of actin filament bundle assembly 3/1105 22/16241  
 0.185599364 0.465134732 0.372693889 MYOC/SHANK1/TMEFF2 3  
 GO:0032373 BP positive regulation of sterol transport 3/1105 22/16241 0.185599364

0.465134732 0.372693889 ADIPOQ/APOE/APOA1 3  
 GO:0032376 BP positive regulation of cholesterol transport 3/1105 22/162410.185599364  
 0.465134732 0.372693889 ADIPOQ/APOE/APOA1 3  
 GO:0032727 BP positive regulation of interferon-alpha production 3/1105 22/16241  
 0.185599364 0.465134732 0.372693889 TLR7/TLR8/TLR9 3  
 GO:0032799 BP low-density lipoprotein receptor particle metabolic process 3/1105  
 22/162410.185599364 0.465134732 0.372693889 ADIPOQ/APOE/PCSK9 3  
 GO:0034390 BP smooth muscle cell apoptotic process 3/1105 22/162410.185599364  
 0.465134732 0.372693889 IGF1/IL12B/APOH 3  
 GO:0034391 BP regulation of smooth muscle cell apoptotic process 3/1105 22/16241  
 0.185599364 0.465134732 0.372693889 IGF1/IL12B/APOH 3  
 GO:0042359 BP vitamin D metabolic process 3/1105 22/162410.185599364 0.465134732  
 0.372693889 FGFR1/CYP3A4/FGF23 3  
 GO:0045821 BP positive regulation of glycolytic process 3/1105 22/162410.185599364  
 0.465134732 0.372693889 HTR2A/IGF1/MLXIPL 3  
 GO:0051043 BP regulation of membrane protein ectodomain proteolysis 3/1105  
 22/162410.185599364 0.465134732 0.372693889 APOE/TIMP2/TIMP3 3  
 GO:0060065 BP uterus development 3/1105 22/162410.185599364 0.465134732  
 0.372693889 MYOCD/WNT9B/HOXA11 3  
 GO:1903306 BP negative regulation of regulated secretory pathway 3/1105 22/16241  
 0.185599364 0.465134732 0.372693889 CCR2/FCGR2B/SYT4 3  
 GO:0051260 BP protein homooligomerization 28/1105 344/16241 0.185821417  
 0.465453749 0.372949504  
 ACTN2/ADIPOQ/ANXA6/APOE/COLEC12/CRYAB/DPYS/DPYSL3/EMILIN1/KCNA1/KCNA2/KCN  
 A4/KCNA5/KCNB1/KCTD8/NLGN1/P2RX2/PLN/PRND/SYT11/TCL1A/KCNV1/LCN2/LY6G6C/OLFM4  
 /OTC/P2RX3/REG1A 28  
 GO:0043491 BP protein kinase B signaling 20/1105 237/16241 0.18767181  
 0.469688407 0.376342567  
 AXL/CCL19/CCL21/CCR7/FGF10/FGF2/FGF5/FGF7/FGFR1/IGF1/IGFBP5/MYOC/NTRK2/P2RY1  
 2/PDGFRB/PHLDA3/THBS1/ADTRP/FGF23/XDH 20  
 GO:0003281 BP ventricular septum development 7/1105 69/162410.187852283  
 0.469688407 0.376342567 HEG1/HEYL/LTBP1/SLIT2/SLIT3/ZFPM2/SALL1 7  
 GO:0030166 BP proteoglycan biosynthetic process 7/1105 69/162410.187852283  
 0.469688407 0.376342567 BGN/CHST8/DCN/DESL/EXTL1/IGF1/VCAN 7  
 GO:0051668 BP localization within membrane 13/1105 145/16241 0.187894487  
 0.469688407 0.376342567  
 APOE/CACNG7/CDH2/FLNA/GRIK5/ITGB2/NETO1/NLGN1/NRXN2/PTPRC/REEP2/RELN/THY1  
 13  
 GO:0001754 BP eye photoreceptor cell differentiation 5/1105 45/162410.189125303  
 0.471086961 0.377463173 NTRK2/RORB/THY1/GNGT1/IHH 5  
 GO:0002820 BP negative regulation of adaptive immune response 5/1105 45/16241  
 0.189125303 0.471086961 0.377463173 CLEC4G/CR1/FCGR2B/PTPRC/C4BPB 5  
 GO:0031018 BP endocrine pancreas development 5/1105 45/162410.189125303  
 0.471086961 0.377463173 FOXA2/NEUROD1/NKX6-2/PAX4/RFX6 5

GO:0042304 BP regulation of fatty acid biosynthetic process 5/1105 45/162410.189125303  
0.471086961 0.377463173 ADIPOQ/APOA4/APOA5/APOC3/MLXIPL 5

GO:0070169 BP positive regulation of biomineral tissue development 5/1105 45/16241  
0.189125303 0.471086961 0.377463173 SLC8A1/TGFB3/TMEM119/ADGRV1/BMP7 5

GO:0072604 BP interleukin-6 secretion 5/1105 45/162410.189125303 0.471086961  
0.377463173 C1QTNF4/SYT11/TLR8/IL17A/IL17F 5

GO:2000107 BP negative regulation of leukocyte apoptotic process 5/1105 45/16241  
0.189125303 0.471086961 0.377463173 AXL/CCL19/CCL21/CCR7/CXCL12 5

GO:0042110 BP T cell activation 36/1105 454/16241 0.189883279 0.472354239  
0.378478592  
CCL19/CCL21/CCR2/CCR7/CD1C/CLC/CLEC4G/CLECL1/CR1/FCGR2B/FGL2/GLI2/GLI3/GPNMB  
/HLA-DOA/HLA-DPA1/HLA-DPB1/IGF1/IL12B/IL21/KLRK4-KLRK1/LILRB4/LMO1/LRRC32/PLA2G2D  
/PTPRC/THY1/TNFSF8/VCAM1/VSIG4/EPO/FOXN1/HHLA2/IHH/PLA2G2F/SCGB1A1 36

GO:0030004 BP cellular monovalent inorganic cation homeostasis 10/1105 107/16241  
0.191599857 0.472354239 0.378478592  
AGTR2/ATP1A2/ATP1A4/C7/KCNMA1/SLC8A1/ATP6V1C2/NOX1/SLC26A3/SLC9A2 10

GO:0031623 BP receptor internalization 10/1105 107/16241 0.191599857 0.472354239  
0.378478592 CACNG7/DKK1/GREM1/GRIA1/ITGB2/LRRTM1/RAB31/RSPO1/SFRP4/PCSK9  
10

GO:0097164 BP ammonium ion metabolic process 17/1105 198/16241 0.191726223  
0.472354239 0.378478592  
AGTR2/BCHE/CHAT/ITGB2/MOXD1/PCYT1B/PLA2G2D/AKR1B10/AKR1C4/APOA1/APOA2/AP  
OA4/APOA5/DDC/PLA2G2F/PLA2G4E/PLA2G4F 17

GO:0098659 BP inorganic cation import across plasma membrane 8/1105 82/16241  
0.19344455 0.472354239 0.378478592  
ABCC9/ATP1A2/ATP1A4/CNGA3/KCNJ5/SLC12A3/SLC8A1/SLC9A2 8

GO:0099587 BP inorganic ion import across plasma membrane 8/1105 82/16241  
0.19344455 0.472354239 0.378478592  
ABCC9/ATP1A2/ATP1A4/CNGA3/KCNJ5/SLC12A3/SLC8A1/SLC9A2 8

GO:0048015 BP phosphatidylinositol-mediated signaling 15/1105 172/16241  
0.193596604 0.472354239 0.378478592  
CSF1R/DCN/FGFR1/FLT3/HTR2A/IGF1/MYOC/NGF/NPR3/NTRK2/PDGFRB/RELN/SELP/EPO/F  
2 15

GO:0033500 BP carbohydrate homeostasis 19/1105 225/16241 0.194303717  
0.472354239 0.378478592  
ADCY5/ADIPOQ/CARTPT/CMA1/CNR1/EPHA5/GRIK5/IGFBP5/KCNB1/NGFR/PTPRN/SERPINF  
1/SUCNR1/FOXA2/G6PC/MLXIPL/NEUROD1/PCK1/RFX6 19

GO:0042593 BP glucose homeostasis 19/1105 225/16241 0.194303717 0.472354239  
0.378478592  
ADCY5/ADIPOQ/CARTPT/CMA1/CNR1/EPHA5/GRIK5/IGFBP5/KCNB1/NGFR/PTPRN/SERPINF  
1/SUCNR1/FOXA2/G6PC/MLXIPL/NEUROD1/PCK1/RFX6 19

GO:0001973 BP adenosine receptor signaling pathway 2/1105 12/162410.194538401  
0.472354239 0.378478592 ADCY5/P2RY12 2

GO:0002863 BP positive regulation of inflammatory response to antigenic stimulus 2/1105

12/162410.194538401 0.472354239 0.378478592 CCR7/CNR1 2

GO:0006068 BP ethanol catabolic process 2/1105 12/162410.194538401 0.472354239  
0.378478592 ADH7/SULT2A1 2

GO:0006069 BP ethanol oxidation 2/1105 12/162410.194538401 0.472354239  
0.378478592 ADH1B/ADH7 2

GO:0006828 BP manganese ion transport 2/1105 12/162410.194538401 0.472354239  
0.378478592 ATP2C2/SLC30A10 2

GO:0007320 BP insemination 2/1105 12/162410.194538401 0.472354239 0.378478592  
TAC1/SEMG1 2

GO:0009111 BP vitamin catabolic process 2/1105 12/162410.194538401 0.472354239  
0.378478592 CYP4F2/FGF232

GO:0009886 BP post-embryonic animal morphogenesis 2/1105 12/162410.194538401  
0.472354239 0.378478592 EFEMP1/FBN1 2

GO:0010649 BP regulation of cell communication by electrical coupling 2/1105  
12/162410.194538401 0.472354239 0.378478592 CASQ2/SLC8A1 2

GO:0010755 BP regulation of plasminogen activation 2/1105 12/162410.194538401  
0.472354239 0.378478592 SERPINE1/THBS1 2

GO:0015816 BP glycine transport 2/1105 12/162410.194538401 0.472354239  
0.378478592 RGS4/SLC6A17 2

GO:0016554 BP cytidine to uridine editing 2/1105 12/162410.194538401 0.472354239  
0.378478592 A1CF/APOBEC1 2

GO:0021559 BP trigeminal nerve development 2/1105 12/162410.194538401  
0.472354239 0.378478592 PLXNA4/TIFAB 2

GO:0021889 BP olfactory bulb interneuron differentiation 2/1105 12/162410.194538401  
0.472354239 0.378478592 SLIT2/SALL1 2

GO:0030157 BP pancreatic juice secretion 2/1105 12/162410.194538401 0.472354239  
0.378478592 NPR3/CEL 2

GO:0031274 BP positive regulation of pseudopodium assembly 2/1105 12/16241  
0.194538401 0.472354239 0.378478592 CCL21/CCR7 2

GO:0031282 BP regulation of guanylate cyclase activity 2/1105 12/162410.194538401  
0.472354239 0.378478592 GUCA2A/PDZD3 2

GO:0032230 BP positive regulation of synaptic transmission, GABAergic 2/1105  
12/162410.194538401 0.472354239 0.378478592 NLGN1/TAC1 2

GO:0032905 BP transforming growth factor beta1 production 2/1105 12/16241  
0.194538401 0.472354239 0.378478592 LUM/THBS1 2

GO:0033147 BP negative regulation of intracellular estrogen receptor signaling pathway  
2/1105 12/162410.194538401 0.472354239 0.378478592 CYP7B1/FOXH1 2

GO:0034331 BP cell junction maintenance 2/1105 12/162410.194538401 0.472354239  
0.378478592 CSF1R/RASSF8 2

GO:0042416 BP dopamine biosynthetic process 2/1105 12/162410.194538401  
0.472354239 0.378478592 AGTR2/DDC 2

GO:0042953 BP lipoprotein transport 2/1105 12/162410.194538401 0.472354239  
0.378478592 PRKCB/APOBEC1 2

GO:0044872 BP lipoprotein localization 2/1105 12/162410.194538401 0.472354239

0.378478592 PRKCB/APOBEC1 2  
 GO:0045161 BP neuronal ion channel clustering 2/1105 12/162410.194538401  
 0.472354239 0.378478592 MYOC/NFASC 2  
 GO:0048642 BP negative regulation of skeletal muscle tissue development 2/1105  
 12/162410.194538401 0.472354239 0.378478592 DKK1/MYOC 2  
 GO:0048712 BP negative regulation of astrocyte differentiation 2/1105 12/16241  
 0.194538401 0.472354239 0.378478592 F2/NR2E1 2  
 GO:0048934 BP peripheral nervous system neuron differentiation 2/1105 12/16241  
 0.194538401 0.472354239 0.378478592 HAND2/NTRK2 2  
 GO:0048935 BP peripheral nervous system neuron development 2/1105 12/16241  
 0.194538401 0.472354239 0.378478592 HAND2/NTRK2 2  
 GO:0051549 BP positive regulation of keratinocyte migration 2/1105 12/16241  
 0.194538401 0.472354239 0.378478592 FGF10/FGF7 2  
 GO:0051956 BP negative regulation of amino acid transport 2/1105 12/162410.194538401  
 0.472354239 0.378478592 NPY5R/RGS4 2  
 GO:0060081 BP membrane hyperpolarization 2/1105 12/162410.194538401 0.472354239  
 0.378478592 KCNA5/SLC26A3 2  
 GO:0060123 BP regulation of growth hormone secretion 2/1105 12/162410.194538401  
 0.472354239 0.378478592 ADCYAP1/KISS1 2  
 GO:0060742 BP epithelial cell differentiation involved in prostate gland development 2/1105  
 12/162410.194538401 0.472354239 0.378478592 AR/HOXB13 2  
 GO:0060911 BP cardiac cell fate commitment 2/1105 12/162410.194538401 0.472354239  
 0.378478592 DKK1/TENM4 2  
 GO:0071073 BP positive regulation of phospholipid biosynthetic process 2/1105  
 12/162410.194538401 0.472354239 0.378478592 HTR2A/HTR2C 2  
 GO:0071468 BP cellular response to acidic pH 2/1105 12/162410.194538401 0.472354239  
 0.378478592 NOX1/PCK1 2  
 GO:0071481 BP cellular response to X-ray 2/1105 12/162410.194538401 0.472354239  
 0.378478592 SFRP1/SFRP2 2  
 GO:0072178 BP nephric duct morphogenesis 2/1105 12/162410.194538401 0.472354239  
 0.378478592 EPHA7/WNT9B 2  
 GO:0090399 BP replicative senescence 2/1105 12/162410.194538401 0.472354239  
 0.378478592 SERPINE1/TERT 2  
 GO:2000650 BP negative regulation of sodium ion transmembrane transporter activity  
 2/1105 12/162410.194538401 0.472354239 0.378478592 ATP1A2/PCSK9 2  
 GO:2001053 BP regulation of mesenchymal cell apoptotic process 2/1105 12/16241  
 0.194538401 0.472354239 0.378478592 GDF5/BMP7 2  
 GO:0051896 BP regulation of protein kinase B signaling 18/1105 212/16241 0.195848503  
 0.475300319 0.380839168  
 AXL/CCL19/CCL21/CCR7/FGF10/FGF2/FGF5/FGF7/FGFR1/IGFBP5/MYOC/NTRK2/P2RY12/PD  
 GFRB/PHLDA3/THBS1/FGF23/XDH 18  
 GO:0010771 BP negative regulation of cell morphogenesis involved in differentiation 9/1105  
 95/162410.197038287 0.477715729 0.382774539  
 EPHA7/FBLN1/MAG/NGFR/NLGN1/PTPRS/SLIT2/THY1/TNR9

GO:0042100 BP B cell proliferation 9/1105 95/162410.197038287 0.477715729  
0.382774539 CD22/CR2/FCGR2B/GAPT/IL21/MS4A1/PTPRC/TLR9/TNFRSF13B9

GO:0042440 BP pigment metabolic process 7/1105 70/162410.197410286 0.478381512  
0.383308005 ZEB2/AMBP/SLC45A2/UGT1A1/UGT1A7/UGT1A8/UGT1A9 7

GO:0010259 BP multicellular organism aging 4/1105 34/162410.19806715 0.478556734  
0.383448403 COMP/CRYAB/RNF165/DDC 4

GO:0021522 BP spinal cord motor neuron differentiation 4/1105 34/162410.19806715  
0.478556734 0.383448403 GLI2/GLI3/PHOX2A/NKX6-2 4

GO:0033144 BP negative regulation of intracellular steroid hormone receptor signaling  
pathway 4/1105 34/162410.19806715 0.478556734 0.383448403  
CYP7B1/HEYL/SFRP1/FOXH1 4

GO:0040019 BP positive regulation of embryonic development 4/1105 34/16241  
0.19806715 0.478556734 0.383448403 AR/IGF1/TENM4/FOXA2 4

GO:0042462 BP eye photoreceptor cell development 4/1105 34/162410.19806715  
0.478556734 0.383448403 NTRK2/RORB/THY1/GNGT1 4

GO:0042554 BP superoxide anion generation 4/1105 34/162410.19806715 0.478556734  
0.383448403 CYBB/ITGB2/DUOX2/NOX1 4

GO:0060071 BP Wnt signaling pathway, planar cell polarity pathway 10/1105 108/16241  
0.199247338 0.481171546 0.385543548  
DACT1/DKK1/PRICKLE1/PRICKLE2/ROR2/RSPO3/SFRP1/SFRP2/WNT9B/GRHL3 10

GO:0071216 BP cellular response to biotic stimulus 19/1105 226/16241 0.19953078  
0.481382706 0.385712742  
AXL/BPI/CEBPE/CTSG/CXCL13/CXCL9/FCGR2B/IGFBPL1/IL12B/KLRC4-KLRK1/MRC1/SERPINE  
1/VIM/ABCC2/DEFA1/IL36G/IL36RN/IL37/LCN2 19

GO:0097237 BP cellular response to toxic substance 19/1105 226/16241 0.19953078  
0.481382706 0.385712742  
APOE/AXL/CYBB/CYP1B1/FBLN5/KCNMB1/MPO/SOD3/TPO/TXNDC2/AKR1B10/APOA4/BMP  
7/DUOX2/FABP1/GSTA1/IYD/LCN2/UGT1A1 19

GO:0042490 BP mechanoreceptor differentiation 6/1105 58/162410.20031675  
0.48280465 0.386852089 FGFR1/GABRA5/NTRK2/ADGRV1/ATOH1/USH1G 6

GO:0045604 BP regulation of epidermal cell differentiation 6/1105 58/162410.20031675  
0.48280465 0.386852089 PTCH2/SFRP4/ATOH1/REG3A/REG3G/SERPINB13 6

GO:1903707 BP negative regulation of hemopoiesis 12/1105 134/16241 0.200948798  
0.483545761 0.387445911  
ADIPOQ/C1QC/CARTPT/FBN1/FCGR2B/FGL2/GLI3/LILRB4/SFRP1/IHH/PGLYRP3/PGLYRP4 12

GO:0002712 BP regulation of B cell mediated immunity 5/1105 46/162410.201216503  
0.483545761 0.387445911 CR1/FCER2/FCGR2B/PTPRC/C4BPB 5

GO:0002889 BP regulation of immunoglobulin mediated immune response 5/1105  
46/162410.201216503 0.483545761 0.387445911 CR1/FCER2/FCGR2B/PTPRC/C4BPB  
5

GO:0007566 BP embryo implantation 5/1105 46/162410.201216503 0.483545761  
0.387445911 FBLN1/MMP2/PTGIS/EPO/SCGB1A1 5

GO:0048066 BP developmental pigmentation 5/1105 46/162410.201216503 0.483545761  
0.387445911 GLI3/SOX10/ZEB2/IHH/SLC45A2 5

GO:0051181 BP cofactor transport 5/1105 46/162410.201216503 0.483545761  
 0.387445911 FOLR2/FOLR1/HRG/LCN2/SLC25A48 5  
 GO:0002064 BP epithelial cell development 17/1105 200/16241 0.202885959  
 0.483545761 0.387445911  
 ACTA2/ADIPOQ/AR/COL4A4/FGFR1/FLNA/FRMD6/HEG1/NKX3-2/PALLD/PECAM1/PTPRS/S1  
 PR3/VIM/HOXB13/IHH/SIX3 17  
 GO:0001556 BP oocyte maturation 3/1105 23/162410.203380607 0.483545761  
 0.387445911 DAZL/NPPC/PDE3A 3  
 GO:0007530 BP sex determination 3/1105 23/162410.203380607 0.483545761  
 0.387445911 AR/DHH/PTGDR 3  
 GO:0010447 BP response to acidic pH 3/1105 23/162410.203380607 0.483545761  
 0.387445911 SERPINF1/NOX1/PCK1 3  
 GO:0010874 BP regulation of cholesterol efflux 3/1105 23/162410.203380607  
 0.483545761 0.387445911 ADIPOQ/APOE/APOA1 3  
 GO:0019400 BP alditol metabolic process 3/1105 23/162410.203380607 0.483545761  
 0.387445911 MOGAT2/MOGAT3/PCK1 3  
 GO:0021544 BP subpallium development 3/1105 23/162410.203380607 0.483545761  
 0.387445911 FOXP2/GLI3/SLITRK5 3  
 GO:0022410 BP circadian sleep/wake cycle process 3/1105 23/162410.203380607  
 0.483545761 0.387445911 KCNA2/NLGN1/PTGDS 3  
 GO:0030813 BP positive regulation of nucleotide catabolic process 3/1105 23/16241  
 0.203380607 0.483545761 0.387445911 HTR2A/IGF1/MLXIPL 3  
 GO:0032703 BP negative regulation of interleukin-2 production 3/1105 23/16241  
 0.203380607 0.483545761 0.387445911 NAV3/PTPRC/VSIG4 3  
 GO:0033081 BP regulation of T cell differentiation in thymus 3/1105 23/162410.203380607  
 0.483545761 0.387445911 GLI2/FOXP1/IHH 3  
 GO:0035588 BP G protein-coupled purinergic receptor signaling pathway 3/1105  
 23/162410.203380607 0.483545761 0.387445911 ADCY5/P2RY10/P2RY12 3  
 GO:0043576 BP regulation of respiratory gaseous exchange 3/1105 23/162410.203380607  
 0.483545761 0.387445911 ATP1A2/NLGN1/PHOX2A 3  
 GO:0051197 BP positive regulation of coenzyme metabolic process 3/1105 23/16241  
 0.203380607 0.483545761 0.387445911 HTR2A/IGF1/MLXIPL 3  
 GO:0055022 BP negative regulation of cardiac muscle tissue growth 3/1105 23/16241  
 0.203380607 0.483545761 0.387445911 KCNK2/PI16/RGS4 3  
 GO:0061117 BP negative regulation of heart growth 3/1105 23/162410.203380607  
 0.483545761 0.387445911 KCNK2/PI16/RGS4 3  
 GO:0061436 BP establishment of skin barrier 3/1105 23/162410.203380607 0.483545761  
 0.387445911 FLG/KRT1/GRHL3 3  
 GO:0071467 BP cellular response to pH 3/1105 23/162410.203380607 0.483545761  
 0.387445911 KCNK4/NOX1/PCK1 3  
 GO:0090344 BP negative regulation of cell aging 3/1105 23/162410.203380607  
 0.483545761 0.387445911 AKT3/SLC30A10/TERT 3  
 GO:0097150 BP neuronal stem cell population maintenance 3/1105 23/162410.203380607  
 0.483545761 0.387445911 CDH2/PRRX1/IGF2BP1 3

GO:1903859 BP regulation of dendrite extension 3/1105 23/162410.203380607  
0.483545761 0.387445911 CACNG7/SYT4/REG1A 3

GO:2000679 BP positive regulation of transcription regulatory region DNA binding 3/1105  
23/162410.203380607 0.483545761 0.387445911 HAND2/IGF1/NEUROD1 3

GO:0002221 BP pattern recognition receptor signaling pathway 16/1105 187/16241  
0.204368976 0.485660576 0.389140428  
COLEC12/FCN1/ITGB2/LILRA4/PTPRS/TLR7/TLR8/TLR9/DMBT1/FGA/FGB/FGG/PGLYRP3/PGL  
YRP4/REG3G/S100A14 16

GO:0008585 BP female gonad development 9/1105 96/162410.205310225 0.487661425  
0.390743628 ADAMTS1/ADCYAP1/PCYT1B/PTPRN/RETN/SFRP1/SLIT2/SLIT3/ZFPM2 9

GO:0071347 BP cellular response to interleukin-1 15/1105 174/16241 0.205673311  
0.488287726 0.391245458  
AKAP12/CCL13/CCL14/CCL19/CCL21/PTGIS/SFRP1/ABCC2/CCL15/CCL20/FGB/FGG/IL17A/LC  
N2/PCK1 15

GO:0010827 BP regulation of glucose transmembrane transport 7/1105 71/16241  
0.207154528 0.491566686 0.393872758  
ADIPOQ/CLIP3/EDNRA/IGF1/PRKCB/SORBS1/TERT 7

GO:0045580 BP regulation of T cell differentiation 12/1105 135/16241 0.207923575  
0.49312206 0.395119017  
CCL19/CCR2/CR1/FGL2/GLI2/GLI3/HLA-DOA/IL12B/LILRB4/PTPRC/FOXP1/IHH 12

GO:0110053 BP regulation of actin filament organization 20/1105 241/16241  
0.208010771 0.49312206 0.395119017  
ACTN2/ADD2/CCL21/CCR7/CXCL12/ELN/FLNA/FMN2/LMOD1/MAGEL2/MYOC/RGS4/SFRP1/  
SHANK1/SLIT2/SYNPO2/TAC1/TGFB3/TMEFF2/APOA1 20

GO:0001960 BP negative regulation of cytokine-mediated signaling pathway 6/1105  
59/162410.211180866 0.499749634 0.400429428  
ADIPOQ/PTPRC/SLIT2/SLIT3/APOA1/IL36RN 6

GO:0032370 BP positive regulation of lipid transport 6/1105 59/162410.211180866  
0.499749634 0.400429428 ADIPOQ/APOE/RETN/TAC1/APOA1/CYP4F2 6

GO:0002028 BP regulation of sodium ion transport 8/1105 84/162410.211315145  
0.499749634 0.400429428 ATP1A2/CNTN1/FXYD6/NETO1/SCN2B/SLC8A1/FXYD4/PCSK9  
8

GO:0019217 BP regulation of fatty acid metabolic process 8/1105 84/162410.211315145  
0.499749634 0.400429428 ADIPOQ/CNR1/APOA4/APOA5/APOC3/FABP1/MLXIPL/UGT1A8  
8

GO:0043506 BP regulation of JUN kinase activity 8/1105 84/162410.211315145  
0.499749634 0.400429428 CCL19/DKK1/NRK/ROR2/SFRP1/SFRP2/TLR9/ZEB2 8

GO:0048017 BP inositol lipid-mediated signaling 15/1105 175/16241 0.211837806  
0.500744611 0.401226663  
CSF1R/DCN/FGFR1/FLT3/HTR2A/IGF1/MYOC/NGF/NPR3/NTRK2/PDGFRB/RELN/SELP/EPO/F  
2 15

GO:0008406 BP gonad development 18/1105 215/16241 0.212302694 0.50111959  
0.401527119  
ADAMTS1/ADCYAP1/AR/DHH/FLNA/PCYT1B/PDGFRB/PTPRN/RETN/SFRP1/SFRP2/SLIT2/SLIT

3/UTF1/ZFPM2/HOXA11/REN/SALL1 18

GO:0015695 BP organic cation transport 4/1105 35/162410.212506536 0.50111959  
0.401527119 CHRNA3/SLC18A3/TACR2/SLC25A48 4

GO:0032735 BP positive regulation of interleukin-12 production 4/1105 35/16241  
0.212506536 0.50111959 0.401527119 CCL19/CCR7/IL12B/TLR94

GO:0045777 BP positive regulation of blood pressure 4/1105 35/162410.212506536  
0.50111959 0.401527119 CARTPT/CNR1/SPX/NPFF 4

GO:0071634 BP regulation of transforming growth factor beta production 4/1105  
35/162410.212506536 0.50111959 0.401527119 LRRC32/LTBP1/LUM/THBS1 4

GO:0043409 BP negative regulation of MAPK cascade 14/1105 162/16241 0.213185361  
0.502156816 0.402358206  
ADIPOQ/APOE/DACT1/EMILIN1/FBLN1/PTPRC/RGS4/SFRP1/SFRP2/TIMP3/UCHL1/AMBP/B  
MP7/KLHL31 14

GO:0051403 BP stress-activated MAPK cascade 22/1105 269/16241 0.213434711  
0.502156816 0.402358206  
CCL19/CCL21/CCR7/CRYAB/DACT1/DKK1/FCGR2B/GDF6/HAND2/NRK/ROR2/SFRP1/SFRP2/T  
LR9/ZEB2/AMBP/IL36G/IL36RN/IL37/KLHL31/NOX1/XDH 22

GO:0007622 BP rhythmic behavior 5/1105 47/162410.21355977 0.502156816  
0.402358206 EGR2/KCNA2/NLGN1/PTGDS/SIX3 5

GO:0010718 BP positive regulation of epithelial to mesenchymal transition 5/1105  
47/162410.21355977 0.502156816 0.402358206  
COL1A1/TGFB11/TGFB3/WWTR1/BMP7 5

GO:0045058 BP T cell selection 5/1105 47/162410.21355977 0.502156816 0.402358206  
CCR7/GLI3/IL12B/PTPRC/FOXN1 5

GO:1902373 BP negative regulation of mRNA catabolic process 5/1105 47/16241  
0.21355977 0.502156816 0.402358206 DAZL/RBM24/VIP/APOBEC1/IGF2BP1 5

GO:0120162 BP positive regulation of cold-induced thermogenesis 9/1105 97/16241  
0.21372157 0.502296818 0.402470385  
ADCYAP1/ADIPOQ/ADRB3/CCR2/CMKLR1/EBF2/FABP4/LCN2/YBX2 9

GO:0017156 BP calcium ion regulated exocytosis 13/1105 149/16241 0.21426761  
0.503339311 0.403305693  
CACNA1G/CAMK2A/CHRM2/CHRNA6/CNR1/GRIK5/HTR2A/KCNB1/NLGN1/PRKCB/SYT11/SY  
T4/SYT6 13

GO:0048593 BP camera-type eye morphogenesis 10/1105 110/16241 0.214924786  
0.504400644 0.404156096  
COL8A1/COL8A2/GLI3/RORB/TENM3/THY1/WNT9A/BMP7/IHH/SIX3 10

GO:0090175 BP regulation of establishment of planar polarity 10/1105 110/16241  
0.214924786 0.504400644 0.404156096  
DACT1/DKK1/PRICKLE1/PRICKLE2/ROR2/RSPO3/SFRP1/SFRP2/WNT9B/GRHL3 10

GO:0002087 BP regulation of respiratory gaseous exchange by neurological system process  
2/1105 13/162410.220134677 0.506358885 0.405725157 ATP1A2/NLGN1 2

GO:0005513 BP detection of calcium ion 2/1105 13/162410.220134677 0.506358885  
0.405725157 CASQ2/KCNMB1 2

GO:0006707 BP cholesterol catabolic process 2/1105 13/162410.220134677 0.506358885

0.405725157 APOE/CEL 2  
 GO:0007494 BP midgut development 2/1105 13/162410.220134677 0.506358885  
 0.405725157 OTC/REG1A 2  
 GO:0009635 BP response to herbicide 2/1105 13/162410.220134677 0.506358885  
 0.405725157 NEFL/LCN2 2  
 GO:0010642 BP negative regulation of platelet-derived growth factor receptor signaling pathway 2/1105 13/162410.220134677 0.506358885 0.405725157 ADIPOQ/MYOCD 2  
 GO:0016127 BP sterol catabolic process 2/1105 13/162410.220134677 0.506358885  
 0.405725157 APOE/CEL 2  
 GO:0016322 BP neuron remodeling 2/1105 13/162410.220134677 0.506358885  
 0.405725157 ADGRB3/C1QA 2  
 GO:0018206 BP peptidyl-methionine modification 2/1105 13/162410.220134677  
 0.506358885 0.405725157 APOA1/APOA2 2  
 GO:0018298 BP protein-chromophore linkage 2/1105 13/162410.220134677 0.506358885  
 0.405725157 AMBP/RGR 2  
 GO:0019896 BP axonal transport of mitochondrion 2/1105 13/162410.220134677  
 0.506358885 0.405725157 NEFL/UCHL1 2  
 GO:0021554 BP optic nerve development 2/1105 13/162410.220134677 0.506358885  
 0.405725157 GLI3/KCNA2 2  
 GO:0031115 BP negative regulation of microtubule polymerization 2/1105 13/16241  
 0.220134677 0.506358885 0.405725157 CLIP3/STMN2 2  
 GO:0031272 BP regulation of pseudopodium assembly 2/1105 13/162410.220134677  
 0.506358885 0.405725157 CCL21/CCR7 2  
 GO:0031650 BP regulation of heat generation 2/1105 13/162410.220134677 0.506358885  
 0.405725157 CNR1/PTGER3 2  
 GO:0032700 BP negative regulation of interleukin-17 production 2/1105 13/16241  
 0.220134677 0.506358885 0.405725157 IL12B/IL36RN 2  
 GO:0032725 BP positive regulation of granulocyte macrophage colony-stimulating factor production 2/1105 13/162410.220134677 0.506358885 0.405725157 IL12B/TLR9 2  
 GO:0032802 BP low-density lipoprotein particle receptor catabolic process 2/1105  
 13/162410.220134677 0.506358885 0.405725157 APOE/PCSK9 2  
 GO:0035589 BP G protein-coupled purinergic nucleotide receptor signaling pathway 2/1105  
 13/162410.220134677 0.506358885 0.405725157 P2RY10/P2RY12 2  
 GO:0035815 BP positive regulation of renal sodium excretion 2/1105 13/16241  
 0.220134677 0.506358885 0.405725157 AGTR2/TAC1 2  
 GO:0042635 BP positive regulation of hair cycle 2/1105 13/162410.220134677  
 0.506358885 0.405725157 FOXN1/TERT 2  
 GO:0043301 BP negative regulation of leukocyte degranulation 2/1105 13/16241  
 0.220134677 0.506358885 0.405725157 CCR2/FCGR2B 2  
 GO:0043508 BP negative regulation of JUN kinase activity 2/1105 13/162410.220134677  
 0.506358885 0.405725157 SFRP1/SFRP2 2  
 GO:0045059 BP positive thymic T cell selection 2/1105 13/162410.220134677  
 0.506358885 0.405725157 PTPRC/FOXN1 2  
 GO:0045779 BP negative regulation of bone resorption 2/1105 13/162410.220134677

0.506358885 0.405725157 CARTPT/TMEM119 2  
 GO:0050713 BP negative regulation of interleukin-1 beta secretion 2/1105 13/16241  
 0.220134677 0.506358885 0.405725157 APOA1/CARD18 2  
 GO:0050872 BP white fat cell differentiation 2/1105 13/16241.220134677 0.506358885  
 0.405725157 FABP4/FGF10 2  
 GO:0050930 BP induction of positive chemotaxis 2/1105 13/16241.220134677  
 0.506358885 0.405725157 CXCL12/FGF102  
 GO:0051451 BP myoblast migration 2/1105 13/16241.220134677 0.506358885  
 0.405725157 PLEKHO1/THBS4 2  
 GO:0060712 BP spongiotrophoblast layer development 2/1105 13/16241.220134677  
 0.506358885 0.405725157 NRK/ASCL2 2  
 GO:0061000 BP negative regulation of dendritic spine development 2/1105 13/16241  
 0.220134677 0.506358885 0.405725157 NLGN1/PTPRS 2  
 GO:0071415 BP cellular response to purine-containing compound 2/1105 13/16241  
 0.220134677 0.506358885 0.405725157 CASQ2/SLC8A1 2  
 GO:0090713 BP immunological memory process 2/1105 13/16241.220134677  
 0.506358885 0.405725157 FGL2/IL12B 2  
 GO:0097152 BP mesenchymal cell apoptotic process 2/1105 13/16241.220134677  
 0.506358885 0.405725157 GDF5/BMP7 2  
 GO:1901213 BP regulation of transcription from RNA polymerase II promoter involved in  
 heart development 2/1105 13/16241.220134677 0.506358885 0.405725157  
 GREM1/MYOC 2  
 GO:1901626 BP regulation of postsynaptic membrane organization 2/1105 13/16241  
 0.220134677 0.506358885 0.405725157 APOE/CDH2 2  
 GO:1902285 BP semaphorin-plexin signaling pathway involved in neuron projection guidance  
 2/1105 13/16241.220134677 0.506358885 0.405725157 NRP2/PLXNA4 2  
 GO:1902306 BP negative regulation of sodium ion transmembrane transport 2/1105  
 13/16241.220134677 0.506358885 0.405725157 ATP1A2/PCSK9 2  
 GO:1903960 BP negative regulation of anion transmembrane transport 2/1105  
 13/16241.220134677 0.506358885 0.405725157 RGS4/THBS1 2  
 GO:2000194 BP regulation of female gonad development 2/1105 13/16241.220134677  
 0.506358885 0.405725157 RETN/ZFPM2 2  
 GO:2000647 BP negative regulation of stem cell proliferation 2/1105 13/16241.220134677  
 0.506358885 0.405725157 FBLN1/OVOL1 2  
 GO:2001256 BP regulation of store-operated calcium entry 2/1105 13/16241.220134677  
 0.506358885 0.405725157 CASQ1/JPH4 2  
 GO:0001516 BP prostaglandin biosynthetic process 3/1105 24/16241.221532012  
 0.506358885 0.405725157 PTGDS/PTGIS/PLA2G4F 3  
 GO:0001916 BP positive regulation of T cell mediated cytotoxicity 3/1105 24/16241  
 0.221532012 0.506358885 0.405725157 CD1C/IL12B/PTPRC 3  
 GO:0002092 BP positive regulation of receptor internalization 3/1105 24/16241  
 0.221532012 0.506358885 0.405725157 GREM1/SFRP4/PCSK9 3  
 GO:0006688 BP glycosphingolipid biosynthetic process 3/1105 24/16241.221532012  
 0.506358885 0.405725157 ST6GALNAC5/ST8SIA2/ST8SIA6 3

GO:0007214 BP gamma-aminobutyric acid signaling pathway 3/1105 24/16241  
0.221532012 0.506358885 0.405725157 GABRA5/PHF24/GABRA4 3

GO:0010758 BP regulation of macrophage chemotaxis 3/1105 24/16241.221532012  
0.506358885 0.405725157 CMKLR1/THBS1/CXCL17 3

GO:0045922 BP negative regulation of fatty acid metabolic process 3/1105 24/16241  
0.221532012 0.506358885 0.405725157 CNR1/APOC3/UGT1A8 3

GO:0046135 BP pyrimidine nucleoside catabolic process 3/1105 24/16241.221532012  
0.506358885 0.405725157 DPYS/NT5C1A/APOBEC13

GO:0046457 BP prostanoid biosynthetic process 3/1105 24/16241.221532012  
0.506358885 0.405725157 PTGDS/PTGIS/PLA2G4F 3

GO:0050927 BP positive regulation of positive chemotaxis 3/1105 24/16241.221532012  
0.506358885 0.405725157 CCR4/CXCL12/FGF10 3

GO:0060561 BP apoptotic process involved in morphogenesis 3/1105 24/16241  
0.221532012 0.506358885 0.405725157 CRYAB/HAND2/BMP7 3

GO:1903421 BP regulation of synaptic vesicle recycling 3/1105 24/16241.221532012  
0.506358885 0.405725157 FGF14/NLGN1/SYT11 3

GO:1903671 BP negative regulation of sprouting angiogenesis 3/1105 24/16241  
0.221532012 0.506358885 0.405725157 MEOX2/NGFR/THBS1 3

GO:2000191 BP regulation of fatty acid transport 3/1105 24/16241.221532012  
0.506358885 0.405725157 AGTR2/THBS1/CYP4F2 3

GO:0010812 BP negative regulation of cell-substrate adhesion 6/1105 60/16241  
0.222244764 0.506858706 0.406125643  
COL1A1/FBLN1/MYOC/SERPINE1/SPOCK1/THBS16

GO:0030521 BP androgen receptor signaling pathway 6/1105 60/16241.222244764  
0.506858706 0.406125643 AR/HEYL/SFRP1/TGFB1I1/FOXH1/SCGB2A1 6

GO:0051893 BP regulation of focal adhesion assembly 6/1105 60/16241.222244764  
0.506858706 0.406125643 EPHA3/MYOC/SFRP1/THBS1/THY1/HRG 6

GO:0090109 BP regulation of cell-substrate junction assembly 6/1105 60/16241  
0.222244764 0.506858706 0.406125643 EPHA3/MYOC/SFRP1/THBS1/THY1/HRG 6

GO:0051291 BP protein heterooligomerization 9/1105 98/16241.222266623  
0.506858706 0.406125643  
ADIPOQ/COL1A1/COL1A2/COL6A1/COL6A2/IKZF1/KRT1/NLGN1/SEMG1 9

GO:0042303 BP molting cycle 10/1105 111/16241 0.222945698 0.507935653  
0.406988558 DKK1/FGF10/FGF7/IGFBP5/PTCH2/DSG4/FOXN1/HOXC13/TERT/TGM3 10

GO:0042633 BP hair cycle 10/1105 111/16241 0.222945698 0.507935653 0.406988558  
DKK1/FGF10/FGF7/IGFBP5/PTCH2/DSG4/FOXN1/HOXC13/TERT/TGM3 10

GO:0002931 BP response to ischemia 5/1105 48/16241.22613482 0.513296781  
0.411284216 BVES/CAMK2A/CSF1R/P2RX2/UCLH1 5

GO:0010107 BP potassium ion import 5/1105 48/16241.22613482 0.513296781  
0.411284216 ABCC9/ATP1A2/ATP1A4/KCNJ5/SLC12A3 5

GO:0010862 BP positive regulation of pathway-restricted SMAD protein phosphorylation  
5/1105 48/16241.22613482 0.513296781 0.411284216  
GDF10/GDF5/GDF6/TGFB3/BMP7 5

GO:0045843 BP negative regulation of striated muscle tissue development 5/1105

48/162410.22613482 0.513296781 0.411284216 DKK1/KCNK2/MYOC/PI16/RGS4 5  
 GO:0046850 BP regulation of bone remodeling 5/1105 48/162410.22613482  
 0.513296781 0.411284216 CARTPT/CSF1R/GREM1/SFRP1/TMEM119 5  
 GO:0048146 BP positive regulation of fibroblast proliferation 5/1105 48/162410.22613482  
 0.513296781 0.411284216 DDR2/FGF10/FN1/IGF1/PDGFRB 5  
 GO:0055010 BP ventricular cardiac muscle tissue morphogenesis 5/1105 48/16241  
 0.22613482 0.513296781 0.411284216 COL11A1/HEG1/MYL3/ZFPM2/FOXH1 5  
 GO:0060324 BP face development 5/1105 48/162410.22613482 0.513296781  
 0.411284216 COL1A1/CRISPLD2/DKK1/MMP2/TGFB3 5  
 GO:0009988 BP cell-cell recognition 7/1105 73/162410.227163406 0.513638929  
 0.411558365 ADAM21/CCL19/CCL21/CCR7/FOLR2/FUT3/TEX101 7  
 GO:0030512 BP negative regulation of transforming growth factor beta receptor signaling  
 pathway 7/1105 73/162410.227163406 0.513638929 0.411558365  
 ASPN/EMILIN1/FBN1/HTRA3/LTBP1/TGFB1I1/TGFB3 7  
 GO:0002755 BP MyD88-dependent toll-like receptor signaling pathway 4/1105  
 36/162410.227226668 0.513638929 0.411558365 TLR7/TLR8/TLR9/REG3G 4  
 GO:0043114 BP regulation of vascular permeability 4/1105 36/162410.227226668  
 0.513638929 0.411558365 AKAP12/PDE3A/SLIT2/TACR2 4  
 GO:0045684 BP positive regulation of epidermis development 4/1105 36/16241  
 0.227226668 0.513638929 0.411558365 PTCH2/SFRP4/ATOH1/FOXN1 4  
 GO:0046326 BP positive regulation of glucose import 4/1105 36/162410.227226668  
 0.513638929 0.411558365 ADIPOQ/IGF1/SORBS1/TERT 4  
 GO:0050716 BP positive regulation of interleukin-1 secretion 4/1105 36/16241  
 0.227226668 0.513638929 0.411558365 CCL19/TLR8/ORM1/ORM2 4  
 GO:1900087 BP positive regulation of G1/S transition of mitotic cell cycle 4/1105  
 36/162410.227226668 0.513638929 0.411558365 ADAMTS1/FGF10/KCNA5/TERT 4  
 GO:1904646 BP cellular response to amyloid-beta 4/1105 36/162410.227226668  
 0.513638929 0.411558365 FCGR2B/IGF1/NGFR/VCAM1 4  
 GO:0099504 BP synaptic vesicle cycle 16/1105 191/16241 0.228492846 0.516026143  
 0.413471144  
 CAMK2A/CDH2/CHRM2/CHRNA6/CNR1/FGF14/GRIK5/HTR2A/NLGN1/PRKCB/SNAP91/SYND  
 IG1/SYT11/SYT4/CEL/DDC 16  
 GO:1902905 BP positive regulation of supramolecular fiber organization 16/1105  
 191/16241 0.228492846 0.516026143 0.413471144  
 ACTN2/APOE/CCL21/CCR7/FLNA/FMN2/LMOD1/MAGEL2/MYOC/NAV3/SFRP1/STMN2/SYN  
 PO2/TAC1/TGFB3/APOA1 16  
 GO:0001942 BP hair follicle development 8/1105 86/162410.229792785 0.518723419  
 0.415632364 DKK1/FGF10/FGF7/IGFBP5/DSG4/FOXN1/HOXC13/TGM3 8  
 GO:0030888 BP regulation of B cell proliferation 6/1105 61/162410.233494707  
 0.526112844 0.421553215 CD22/FCGR2B/IL21/PTPRC/TLR9/TNFRSF13B 6  
 GO:0046530 BP photoreceptor cell differentiation 6/1105 61/162410.233494707  
 0.526112844 0.421553215 NTRK2/RORB/THY1/CRX/GNGT1/IHH 6  
 GO:0046635 BP positive regulation of alpha-beta T cell activation 6/1105 61/16241  
 0.233494707 0.526112844 0.421553215 CCL19/CCR2/GLI3/IL12B/PTPRC/IHH 6

GO:1902305 BP regulation of sodium ion transmembrane transport 6/1105 61/16241  
0.233494707 0.526112844 0.421553215 ATP1A2/FXYD6/NETO1/SCN2B/FXYD4/PCSK9  
6

GO:0008202 BP steroid metabolic process 25/1105 314/16241 0.234075709  
0.527180139 0.422408396  
AGTR1/APOE/CYP1B1/CYP7B1/DHH/FGFR1/HSD11B1/AKR1C4/APOA1/APOA2/APOA4/APOA  
5/CEL/CYP2B6/CYP2C19/CYP3A4/CYP3A43/FGF23/G6PC/HSD3B1/NR1I2/PCSK9/SULT2A1/UGT1A  
1/UGT1A8 25

GO:0071456 BP cellular response to hypoxia 16/1105 192/16241 0.23470662  
0.528358808 0.423352816  
ANGPT4/CPEB1/CYBB/FMN2/KCNK2/KCNK3/KCNMB1/PTGIS/SFRP1/SLC8A1/BMP7/EPO/FAB  
P1/GNGT1/PCK1/TERT 16

GO:0050714 BP positive regulation of protein secretion 21/1105 260/16241 0.237086313  
0.533471355 0.427449297  
AGTR2/AKAP12/BLK/C1QTNF4/CCL19/CLEC6A/CLEC9A/CRTAM/CSF1R/FCN1/IGF1/TGFB3/TL  
R8/FGA/FGB/FGG/IL17A/IL17F/ORM1/ORM2/RFX6 21

GO:0043407 BP negative regulation of MAP kinase activity 7/1105 74/16241 0.237408274  
0.53379531 0.427708869 ADIPOQ/APOE/RGS4/SFRP1/SFRP2/UCLH1/BMP7 7

GO:1901214 BP regulation of neuron death 24/1105 301/16241 0.237447629  
0.53379531 0.427708869  
APOE/AXL/C1QA/DKK1/EN1/EPHA7/FCGR2B/GABRA5/GDF5/GPNMB/GRIK5/ITGB2/KCNB1/  
KIR3DL2/MAG/NEFL/NGF/NTRK2/SERPINF1/TGFB3/EPO/PCSK9/SLC30A10/TERT 24

GO:0031529 BP ruffle organization 5/1105 49/16241 0.238921168 0.534370299  
0.428169584 CCL21/CCR7/CSF1R/NLGN1/P2RY12 5

GO:0045104 BP intermediate filament cytoskeleton organization 5/1105 49/16241  
0.238921168 0.534370299 0.428169584 DES/NEFL/SYNN/VIM/KRT20 5

GO:0046456 BP icosanoid biosynthetic process 5/1105 49/16241 0.238921168  
0.534370299 0.428169584 GGT5/PTGDS/PTGIS/GGT6/PLA2G4F 5

GO:0048635 BP negative regulation of muscle organ development 5/1105 49/16241  
0.238921168 0.534370299 0.428169584 DKK1/KCNK2/MYOC/PI16/RGS4 5

GO:0051496 BP positive regulation of stress fiber assembly 5/1105 49/16241 0.238921168  
0.534370299 0.428169584 MYOC/SFRP1/TAC1/TGFB3/APOA15

GO:0060038 BP cardiac muscle cell proliferation 5/1105 49/16241 0.238921168  
0.534370299 0.428169584 FGF2/FGFR1/KCNK2/TENM4/ZFPM2 5

GO:2001238 BP positive regulation of extrinsic apoptotic signaling pathway 5/1105  
49/16241 0.238921168 0.534370299 0.428169584 AGTR2/PTPRC/SFRP1/THBS1/TIMP3  
5

GO:0001952 BP regulation of cell-matrix adhesion 10/1105 113/16241 0.239328169  
0.534370299 0.428169584  
CCL21/CCR7/DDR2/EPHA3/MYOC/SERPINE1/SFRP1/THBS1/THY1/HRG 10

GO:0002719 BP negative regulation of cytokine production involved in immune response  
3/1105 25/16241 0.239987964 0.534370299 0.428169584 TGFB3/APOA1/APOA2 3

GO:0008211 BP glucocorticoid metabolic process 3/1105 25/16241 0.239987964  
0.534370299 0.428169584 HSD11B1/APOA1/HSD3B1 3

GO:0010996 BP response to auditory stimulus 3/1105 25/162410.239987964  
0.534370299 0.428169584 FOXP2/NRXN2/TIFAB 3

GO:0030318 BP melanocyte differentiation 3/1105 25/162410.239987964 0.534370299  
0.428169584 GLI3/SOX10/ZEB2 3

GO:0032691 BP negative regulation of interleukin-1 beta production 3/1105 25/16241  
0.239987964 0.534370299 0.428169584 IGF1/APOA1/CARD18 3

GO:0035235 BP ionotropic glutamate receptor signaling pathway 3/1105 25/16241  
0.239987964 0.534370299 0.428169584 GRIA1/GRIK3/GRIK5 3

GO:0043501 BP skeletal muscle adaptation 3/1105 25/162410.239987964 0.534370299  
0.428169584 IGFBP5/MYOC/MYOZ2 3

GO:0045686 BP negative regulation of glial cell differentiation 3/1105 25/16241  
0.239987964 0.534370299 0.428169584 F2/NKX6-2/NR2E1 3

GO:0045939 BP negative regulation of steroid metabolic process 3/1105 25/16241  
0.239987964 0.534370299 0.428169584 APOE/UGT1A1/UGT1A8 3

GO:0048679 BP regulation of axon regeneration 3/1105 25/162410.239987964  
0.534370299 0.428169584 PTPRS/RGMA/TNR 3

GO:0050926 BP regulation of positive chemotaxis 3/1105 25/162410.239987964  
0.534370299 0.428169584 CCR4/CXCL12/FGF10 3

GO:0060045 BP positive regulation of cardiac muscle cell proliferation 3/1105 25/16241  
0.239987964 0.534370299 0.428169584 FGF2/FGFR1/ZFPM2 3

GO:0120033 BP negative regulation of plasma membrane bounded cell projection assembly  
3/1105 25/162410.239987964 0.534370299 0.428169584 CCL21/SLIT2/HRG 3

GO:0006656 BP phosphatidylcholine biosynthetic process 4/1105 37/162410.242193958  
0.537576468 0.430738559 CHAT/PCYT1B/APOA1/APOA24

GO:0014037 BP Schwann cell differentiation 4/1105 37/162410.242193958 0.537576468  
0.430738559 EGR2/LAMA2/MYOC/NTRK2 4

GO:0031076 BP embryonic camera-type eye development 4/1105 37/162410.242193958  
0.537576468 0.430738559 FGF10/BMP7/IHH/SIX3 4

GO:0042417 BP dopamine metabolic process 4/1105 37/162410.242193958 0.537576468  
0.430738559 AGTR2/ITGB2/MOXD1/DDC 4

GO:0060421 BP positive regulation of heart growth 4/1105 37/162410.242193958  
0.537576468 0.430738559 FGF2/FGFR1/IGF1/ZFPM2 4

GO:0071604 BP transforming growth factor beta production 4/1105 37/162410.242193958  
0.537576468 0.430738559 LRRC32/LTBP1/LUM/THBS1 4

GO:1903170 BP negative regulation of calcium ion transmembrane transport 4/1105  
37/162410.242193958 0.537576468 0.430738559 ATP1A2/CASQ2/PLN/TLR9 4

GO:0003407 BP neural retina development 6/1105 62/162410.244916749 0.540120719  
0.432777166 GPM6A/RORB/THY1/IHH/NEUROD1/SIX3 6

GO:0007585 BP respiratory gaseous exchange 6/1105 62/162410.244916749 0.540120719  
0.432777166 ATP1A2/EDNRA/ELN/NDN/NLGN1/PHOX2A 6

GO:0060761 BP negative regulation of response to cytokine stimulus 6/1105 62/16241  
0.244916749 0.540120719 0.432777166 ADIPOQ/PTPRC/SLIT2/SLIT3/APOA1/IL36RN 6

GO:0003128 BP heart field specification 2/1105 14/162410.245979244 0.540120719  
0.432777166 DKK1/FOXH1 2

GO:0003214 BP cardiac left ventricle morphogenesis 2/1105 14/162410.245979244  
 0.540120719 0.432777166 NPY5R/SFRP2 2  
 GO:0007351 BP tripartite regional subdivision 2/1105 14/162410.245979244 0.540120719  
 0.432777166 TIFAB/TDRD5 2  
 GO:0008595 BP anterior/posterior axis specification, embryo 2/1105 14/16241  
 0.245979244 0.540120719 0.432777166 TIFAB/TDRD5 2  
 GO:0009071 BP serine family amino acid catabolic process 2/1105 14/162410.245979244  
 0.540120719 0.432777166 CDO1/AGXT 2  
 GO:0010248 BP establishment or maintenance of transmembrane electrochemical gradient  
 2/1105 14/162410.245979244 0.540120719 0.432777166 ATP1A2/ATP1A4 2  
 GO:0032274 BP gonadotropin secretion 2/1105 14/162410.245979244 0.540120719  
 0.432777166 TACR2/KISS1 2  
 GO:0035791 BP platelet-derived growth factor receptor-beta signaling pathway 2/1105  
 14/162410.245979244 0.540120719 0.432777166 MYOCD/PDGFRB 2  
 GO:0043249 BP erythrocyte maturation 2/1105 14/162410.245979244 0.540120719  
 0.432777166 TRIM58/EPO 2  
 GO:0045605 BP negative regulation of epidermal cell differentiation 2/1105 14/16241  
 0.245979244 0.540120719 0.432777166 REG3A/REG3G 2  
 GO:0051547 BP regulation of keratinocyte migration 2/1105 14/162410.245979244  
 0.540120719 0.432777166 FGF10/FGF7 2  
 GO:0055064 BP chloride ion homeostasis 2/1105 14/162410.245979244 0.540120719  
 0.432777166 SLC12A3/ABCC2 2  
 GO:0055089 BP fatty acid homeostasis 2/1105 14/162410.245979244 0.540120719  
 0.432777166 APOE/MLXIPL 2  
 GO:0060831 BP smoothened signaling pathway involved in dorsal/ventral neural tube  
 patterning 2/1105 14/162410.245979244 0.540120719 0.432777166 GLI2/GLI3 2  
 GO:0086069 BP bundle of His cell to Purkinje myocyte communication 2/1105 14/16241  
 0.245979244 0.540120719 0.432777166 CTNNA3/KCNA5 2  
 GO:0098915 BP membrane repolarization during ventricular cardiac muscle cell action  
 potential 2/1105 14/162410.245979244 0.540120719 0.432777166 KCNE4/KCNJ5 2  
 GO:0099171 BP presynaptic modulation of chemical synaptic transmission 2/1105  
 14/162410.245979244 0.540120719 0.432777166 CNR1/PRKCB 2  
 GO:1900029 BP positive regulation of ruffle assembly 2/1105 14/162410.245979244  
 0.540120719 0.432777166 NLGN1/P2RY12 2  
 GO:1903975 BP regulation of glial cell migration 2/1105 14/162410.245979244  
 0.540120719 0.432777166 CCR2/P2RY12 2  
 GO:2000402 BP negative regulation of lymphocyte migration 2/1105 14/16241  
 0.245979244 0.540120719 0.432777166 KLRC4-KLRK1/ADTRP 2  
 GO:2001044 BP regulation of integrin-mediated signaling pathway 2/1105 14/16241  
 0.245979244 0.540120719 0.432777166 FLNA/LIMS2 2  
 GO:0035270 BP endocrine system development 11/1105 127/16241 0.246171812  
 0.540302028 0.432922442  
 ADCYAP1/FGF10/GLI2/APOA1/FOXA2/NEUROD1/NKX6-2/PAX4/RFX6/SALL1/SIX3 11  
 GO:1900180 BP regulation of protein localization to nucleus 10/1105 114/16241

0.247679847 0.542905079 0.435008163  
 AGTR2/DCLK1/FLNA/GLI3/LILRB4/NGFR/CHP2/F2/TERT/TRIM40 10  
 GO:0021536 BP diencephalon development 7/1105 75/162410.247799916 0.542905079  
 0.435008163 ADCYAP1/FGF10/GLI2/NRP2/ZEB2/SALL1/SIX3 7  
 GO:0055117 BP regulation of cardiac muscle contraction 7/1105 75/162410.247799916  
 0.542905079 0.435008163 ANK2/ATP1A2/CASQ2/CTNNA3/FLNA/PLN/SLC8A1 7  
 GO:1903845 BP negative regulation of cellular response to transforming growth factor beta  
 stimulus 7/1105 75/162410.247799916 0.542905079 0.435008163  
 ASPN/EMILIN1/FBN1/HTRA3/LTBP1/TGFB1I1/TGFB3 7  
 GO:0022404 BP molting cycle process 8/1105 88/162410.248817233 0.543920893  
 0.435822094 DKK1/FGF10/FGF7/IGFBP5/DSG4/FOXP1/HOXC13/TGM3 8  
 GO:0022405 BP hair cycle process 8/1105 88/162410.248817233 0.543920893  
 0.435822094 DKK1/FGF10/FGF7/IGFBP5/DSG4/FOXP1/HOXC13/TGM3 8  
 GO:0060021 BP roof of mouth development 8/1105 88/162410.248817233 0.543920893  
 0.435822094 BNC2/GLI3/HAND2/LRRC32/MEOX2/PRRX1/TGFB3/WNT9B 8  
 GO:0060333 BP interferon-gamma-mediated signaling pathway 8/1105 88/16241  
 0.248817233 0.543920893 0.435822094  
 CAMK2A/HLA-DPA1/HLA-DPB1/HLA-DQA1/HLA-DQA2/HLA-DQB2/NCAM1/VCAM1 8  
 GO:0098773 BP skin epidermis development 8/1105 88/162410.248817233 0.543920893  
 0.435822094 DKK1/FGF10/FGF7/IGFBP5/DSG4/FOXP1/HOXC13/TGM3 8  
 GO:0045926 BP negative regulation of growth 19/1105 235/16241 0.249444914  
 0.545050453 0.436727166  
 AGTR2/CRYAB/DACT3/EPHA7/FHL1/FRZB/IGFBP5/KCNK2/MAG/PI16/PTPRS/RGS4/SFRP1/SF  
 RP2/SLIT2/SLIT3/TNR/HRG/TRIM40 19  
 GO:0002224 BP toll-like receptor signaling pathway 12/1105 141/16241 0.251828996  
 0.54845927 0.439458514  
 COLEC12/ITGB2/LILRA4/PTPRS/TLR7/TLR8/TLR9/FGA/FGB/FGG/REG3G/S100A14 12  
 GO:0014065 BP phosphatidylinositol 3-kinase signaling 12/1105 141/16241 0.251828996  
 0.54845927 0.439458514  
 DCN/FGFR1/FLT3/HTR2A/IGF1/MYOC/NTRK2/PDGFRB/RELN/SELP/EPO/F2 12  
 GO:0043524 BP negative regulation of neuron apoptotic process 12/1105 141/16241  
 0.251828996 0.54845927 0.439458514  
 APOE/AXL/EN1/GABRA5/GDF5/MAG/NEFL/NGF/NTRK2/TGFB3/SLC30A10/TERT 12  
 GO:0060041 BP retina development in camera-type eye 12/1105 141/16241 0.251828996  
 0.54845927 0.439458514  
 CYP1B1/GPM6A/NTRK2/PDGFRB/RORB/SERPINF1/THY1/TUB/IHH/NEUROD1/NR2E1/SIX3  
 12  
 GO:0006911 BP phagocytosis, engulfment 5/1105 50/162410.251898231 0.54845927  
 0.439458514 FCGR2B/ITGB2/RAB31/THBS1/XKR4 5  
 GO:0060425 BP lung morphogenesis 5/1105 50/162410.251898231 0.54845927  
 0.439458514 FGF10/FGF7/FOXP2/RSPO2/TNC 5  
 GO:0097366 BP response to bronchodilator 5/1105 50/162410.251898231 0.54845927  
 0.439458514 CCL19/CCR7/RGS4/MMP3/PPP1R1B 5  
 GO:1903428 BP positive regulation of reactive oxygen species biosynthetic process 5/1105

50/162410.251898231 0.54845927 0.439458514  
 AGTR2/ITGB2/KLRC4-KLRK1/AGXT2/DUOXA2 5  
 GO:0002218 BP activation of innate immune response 24/1105 304/16241 0.252650429  
 0.549853303 0.440575497  
 CLEC10A/CLEC4C/CLEC6A/COLEC12/FCN1/ITGB2/KLRC4-KLRK1/LILRA4/PTPRS/TLR7/TLR8/TLR9/DMBT1/FGA/FGB/FGG/MUC15/MUC17/MUC21/MUC4/PGLYRP3/PGLYRP4/REG3G/S100A14  
 24  
 GO:0007292 BP female gamete generation 11/1105 128/16241 0.254138502  
 0.552602179 0.442778062  
 ADAMTS1/DAZL/FMN2/IGF1/MEIKIN/NPPC/PDE3A/IHH/MCMDC2/TDRD5/YBX2 11  
 GO:0060359 BP response to ammonium ion 11/1105 128/16241 0.254138502  
 0.552602179 0.442778062  
 CHRM2/CHRNA3/CNR1/GNAO1/HTR2A/HTR3A/PENK/RGS4/TAC1/NPFF/PPP1R1B 11  
 GO:0045670 BP regulation of osteoclast differentiation 6/1105 63/162410.256496793  
 0.557236731 0.446491543 CARTPT/FBN1/IL12B/LILRB4/SFRP1/IL17A 6  
 GO:0048747 BP muscle fiber development 6/1105 63/162410.256496793 0.557236731  
 0.446491543 COMP/FLNC/MYH11/P2RX2/SGCD/UCHL1 6  
 GO:0007223 BP Wnt signaling pathway, calcium modulating pathway 4/1105 38/16241  
 0.257375189 0.5577977 0.446941025 CAMK2A/DKK1/GNAO1/ROR2 4  
 GO:0007520 BP myoblast fusion 4/1105 38/162410.257375189 0.5577977  
 0.446941025 ADGRB3/CXCL9/EHD2/PLEKHO1 4  
 GO:0009187 BP cyclic nucleotide metabolic process 4/1105 38/162410.257375189  
 0.5577977 0.446941025 ADCY2/ADCY5/NPPC/GUCY2C 4  
 GO:1903672 BP positive regulation of sprouting angiogenesis 4/1105 38/16241  
 0.257375189 0.5577977 0.446941025 AGTR1/AKT3/FGF2/FGFBP1 4  
 GO:0001570 BP vasculogenesis 7/1105 76/162410.258328001 0.5577977  
 0.446941025 HEG1/MYOC/NTRK2/PDGFRB/QKI/ZFPM2/XDH 7  
 GO:0001910 BP regulation of leukocyte mediated cytotoxicity 7/1105 76/16241  
 0.258328001 0.5577977 0.446941025  
 CD1C/CRTAM/FCGR2B/IL12B/IL21/KLRC4-KLRK1/PTPRC 7  
 GO:0032642 BP regulation of chemokine production 7/1105 76/162410.258328001  
 0.5577977 0.446941025 ACKR1/ADCYAP1/ADIPOQ/CSF1R/ELANE/TLR7/TLR9 7  
 GO:0007589 BP body fluid secretion 8/1105 89/162410.25851496 0.5577977  
 0.446941025 CDO1/FGF10/NPR3/TAC1/TIFAB/VIP/CEL/XDH 8  
 GO:0030206 BP chondroitin sulfate biosynthetic process 3/1105 26/162410.258685497  
 0.5577977 0.446941025 BGN/DCN/VCAN 3  
 GO:0033561 BP regulation of water loss via skin 3/1105 26/162410.258685497  
 0.5577977 0.446941025 FLG/KRT1/GRHL3 3  
 GO:0042745 BP circadian sleep/wake cycle 3/1105 26/162410.258685497 0.5577977  
 0.446941025 KCNA2/NLGN1/PTGDS 3  
 GO:0048596 BP embryonic camera-type eye morphogenesis 3/1105 26/162410.258685497  
 0.5577977 0.446941025 BMP7/IHH/SIX3 3  
 GO:0070168 BP negative regulation of biomineral tissue development 3/1105 26/16241  
 0.258685497 0.5577977 0.446941025 ASPN/GREM1/FGF23 3

GO:0099625 BP ventricular cardiac muscle cell membrane repolarization 3/1105  
26/162410.258685497 0.5577977 0.446941025 ANK2/KCNE4/KCNJ5 3

GO:1900745 BP positive regulation of p38MAPK cascade 3/1105 26/162410.258685497  
0.5577977 0.446941025 GDF6/HAND2/XDH 3

GO:1903959 BP regulation of anion transmembrane transport 3/1105 26/16241  
0.258685497 0.5577977 0.446941025 ATP1A2/RGS4/THBS1 3

GO:2001025 BP positive regulation of response to drug 3/1105 26/162410.258685497  
0.5577977 0.446941025 CXCL12/RETN/TACR2 3

GO:0035264 BP multicellular organism growth 12/1105 142/16241 0.259457386  
0.55921662 0.448077949  
AR/COMP/EN1/GDF5/GHR/HEG1/IGF1/NPPC/NPY1R/WWTR1/G6PC/IHH 12

GO:0022412 BP cellular process involved in reproduction in multicellular organism 26/1105  
333/16241 0.25986878 0.559857652 0.448591583  
CCNA1/DAZL/DHH/FMN2/FOLR2/IGF1/JAM3/MEIKIN/NPPC/PDE3A/QKI/RETN/RIMBP3B/SF  
RP1/SLIT2/SLIT3/TMEM119/CTCFL/DEFB1/IHH/MCMDC2/SEMG1/SLC26A3/SYCP3/TDRD5/YBX2  
26

GO:0030098 BP lymphocyte differentiation 27/1105 347/16241 0.260702323  
0.561407195 0.449833169  
AXL/CCL19/CCR2/CCR7/CR1/CR2/FCGR2B/FGL2/FLT3/GLI2/GLI3/HLA-DOA/IKZF1/IL12B/LILR  
B4/MS4A1/PLA2G2D/PTPRC/SFRP1/TLR9/TNFSF8/VCAM1/CDH17/FOXP1/IHH/PGLYRP3/PGLYRP4  
27

GO:0045088 BP regulation of innate immune response 33/1105 431/16241 0.26365896  
0.567525334 0.45473539  
A2M/APOE/CLEC10A/CLEC4C/CLEC6A/COLEC12/CR1/CRTAM/FCGR2B/FCN1/IL12B/IL21/ITG  
B2/KLR4-KLRK1/LILRA4/PTPRS/SERPING1/TLR7/TLR8/TLR9/VSIG4/DMBT1/FGA/FGB/FGG/MUC1  
5/MUC17/MUC21/MUC4/PGLYRP3/PGLYRP4/REG3G/S100A14 33

GO:0007368 BP determination of left/right symmetry 10/1105 116/16241 0.264678553  
0.569470457 0.456293939  
ARMC4/BICC1/FGF10/HAND2/NKX3-2/RIPPLY2/FOLR1/FOXP1/IHH/NOTO 10

GO:0003179 BP heart valve morphogenesis 5/1105 51/162410.265045421 0.56976066  
0.456526467 ELN/EMILIN1/HEYL/SLIT2/SLIT3 5

GO:0061900 BP glial cell activation 5/1105 51/162410.265045421 0.56976066  
0.456526467 C1QA/ITGB2/PTPRC/TLR7/TLR8 5

GO:0006631 BP fatty acid metabolic process 28/1105 362/16241 0.266228328  
0.57205317 0.458363364  
ADIPOQ/CNR1/CYP1B1/GGT5/PLP1/PTGDS/PTGIS/QKI/ADH7/ADTRP/AKR1C4/APOA4/APOA  
5/APOC3/CEL/CYP2B6/CYP2C19/CYP2J2/CYP3A4/CYP4F2/CYP4F8/FABP1/FADS6/GSTA1/MLXIPL/  
PCK1/PLA2G4F/UGT1A8 28

GO:0070555 BP response to interleukin-1 16/1105 197/16241 0.266772198  
0.572752583 0.458923776  
AKAP12/CCL13/CCL14/CCL19/CCL21/PTGIS/SFRP1/ABCC2/CCL15/CCL20/EPO/FGB/FGG/IL17  
A/LCN2/PCK1 16

GO:0048640 BP negative regulation of developmental growth 9/1105 103/16241  
0.266787034 0.572752583 0.458923776

EPHA7/KCNK2/MAG/PI16/PTPRS/RGS4/SFRP1/SFRP2/TNR 9

GO:0060135 BP maternal process involved in female pregnancy 6/1105 64/16241  
0.26822065 0.574976741 0.460705905 AR/CNR1/PTGIS/DSG1/IHH/NPFF 6

GO:0060606 BP tube closure 8/1105 90/162410.268325673 0.574976741 0.460705905  
FGF10/PRICKLE1/SFRP1/SFRP2/ZEB2/FOLR1/GRHL3/TRIM71 8

GO:0048708 BP astrocyte differentiation 7/1105 77/162410.268982082 0.574976741  
0.460705905 C1QA/MAG/PLP1/ROR2/VIM/F2/NR2E1 7

GO:0070997 BP neuron death 26/1105 335/16241 0.2698896 0.574976741  
0.460705905  
APOE/AXL/C1QA/DKK1/DPYSL4/EN1/EPHA7/FCGR2B/GABRA5/GDF5/GPNMB/GRIK5/ITGB2/  
KCNB1/KIR3DL2/MAG/NEFL/NGF/NGFR/NTRK2/SERPINF1/TGFB3/EPO/PCSK9/SLC30A10/TERT  
26

GO:0006766 BP vitamin metabolic process 11/1105 130/16241 0.270332686  
0.574976741 0.460705905  
AOX1/FGFR1/FOLR2/CYP3A4/CYP4F2/FGF23/FOLR1/PRSS1/PRSS3/RBP2/VNN311

GO:0002070 BP epithelial cell maturation 2/1105 15/162410.271919986 0.574976741  
0.460705905 HOXB13/SIX3 2

GO:0002739 BP regulation of cytokine secretion involved in immune response 2/1105  
15/162410.271919986 0.574976741 0.460705905 APOA1/APOA2 2

GO:0006544 BP glycine metabolic process 2/1105 15/162410.271919986 0.574976741  
0.460705905 AGXT/AGXT2 2

GO:0010832 BP negative regulation of myotube differentiation 2/1105 15/16241  
0.271919986 0.574976741 0.460705905 MYOCD/TMEM119 2

GO:0018158 BP protein oxidation 2/1105 15/162410.271919986 0.574976741  
0.460705905 APOA1/APOA2 2

GO:0030252 BP growth hormone secretion 2/1105 15/162410.271919986 0.574976741  
0.460705905 ADCYAP1/KISS1 2

GO:0030852 BP regulation of granulocyte differentiation 2/1105 15/162410.271919986  
0.574976741 0.460705905 ADIPOQ/C1QC2

GO:0030949 BP positive regulation of vascular endothelial growth factor receptor signaling  
pathway 2/1105 15/162410.271919986 0.574976741 0.460705905 FGF10/PRKCB 2

GO:0031269 BP pseudopodium assembly 2/1105 15/162410.271919986 0.574976741  
0.460705905 CCL21/CCR7 2

GO:0033033 BP negative regulation of myeloid cell apoptotic process 2/1105 15/16241  
0.271919986 0.574976741 0.460705905 APOH/EPO 2

GO:0042976 BP activation of Janus kinase activity 2/1105 15/162410.271919986  
0.574976741 0.460705905 GHR/IL12B 2

GO:0043652 BP engulfment of apoptotic cell 2/1105 15/162410.271919986 0.574976741  
0.460705905 THBS1/XKR4 2

GO:0044794 BP positive regulation by host of viral process 2/1105 15/162410.271919986  
0.574976741 0.460705905 APOE/CSF1R 2

GO:0046068 BP cGMP metabolic process 2/1105 15/162410.271919986 0.574976741  
0.460705905 NPPC/GUCY2C2

GO:0048070 BP regulation of developmental pigmentation 2/1105 15/162410.271919986

0.574976741 0.460705905 ZEB2/IHH 2  
 GO:0048172 BP regulation of short-term neuronal synaptic plasticity 2/1105 15/16241  
 0.271919986 0.574976741 0.460705905 SHISA8/SYT4 2  
 GO:0048368 BP lateral mesoderm development 2/1105 15/16241 0.271919986  
 0.574976741 0.460705905 FGFR1/FOXH1 2  
 GO:0048569 BP post-embryonic animal organ development 2/1105 15/16241 0.271919986  
 0.574976741 0.460705905 EFEMP1/FBN1 2  
 GO:0051127 BP positive regulation of actin nucleation 2/1105 15/16241 0.271919986  
 0.574976741 0.460705905 FMN2/MAGEL2 2  
 GO:0051238 BP sequestering of metal ion 2/1105 15/16241 0.271919986 0.574976741  
 0.460705905 LCN2/S100A7 2  
 GO:0070365 BP hepatocyte differentiation 2/1105 15/16241 0.271919986 0.574976741  
 0.460705905 FRZB/PCK1 2  
 GO:0070886 BP positive regulation of calcineurin-NFAT signaling cascade 2/1105  
 15/16241 0.271919986 0.574976741 0.460705905 IGF1/CHP2 2  
 GO:0072075 BP metanephric mesenchyme development 2/1105 15/16241 0.271919986  
 0.574976741 0.460705905 PDGFRB/BMP7 2  
 GO:0072148 BP epithelial cell fate commitment 2/1105 15/16241 0.271919986  
 0.574976741 0.460705905 ATOH1/NEUROD1 2  
 GO:0090051 BP negative regulation of cell migration involved in sprouting angiogenesis  
 2/1105 15/16241 0.271919986 0.574976741 0.460705905 MEOX2/THBS12  
 GO:0098719 BP sodium ion import across plasma membrane 2/1105 15/16241  
 0.271919986 0.574976741 0.460705905 SLC8A1/SLC9A2 2  
 GO:0106058 BP positive regulation of calcineurin-mediated signaling 2/1105 15/16241  
 0.271919986 0.574976741 0.460705905 IGF1/CHP2 2  
 GO:1900451 BP positive regulation of glutamate receptor signaling pathway 2/1105  
 15/16241 0.271919986 0.574976741 0.460705905 CCR2/RELN 2  
 GO:1903209 BP positive regulation of oxidative stress-induced cell death 2/1105  
 15/16241 0.271919986 0.574976741 0.460705905 MMP3/NOX1 2  
 GO:1903818 BP positive regulation of voltage-gated potassium channel activity 2/1105  
 15/16241 0.271919986 0.574976741 0.460705905 KCNA1/LRRC38 2  
 GO:0060119 BP inner ear receptor cell development 4/1105 39/16241 0.272737678  
 0.576457605 0.461892462 FGFR1/GABRA5/ADGRV1/USH1G 4  
 GO:0016079 BP synaptic vesicle exocytosis 10/1105 117/16241 0.273315081  
 0.577429538 0.462671234  
 CAMK2A/CHRM2/CHRNA6/CNR1/GRIK5/HTR2A/NLGN1/PRKCB/SYT11/SYT4 10  
 GO:0002385 BP mucosal immune response 3/1105 27/16241 0.277564547 0.584396509  
 0.468253589 APOA4/DEFA1/DEFB1 3  
 GO:0002825 BP regulation of T-helper 1 type immune response 3/1105 27/16241  
 0.277564547 0.584396509 0.468253589 CCL19/CCR2/IL12B 3  
 GO:0031114 BP regulation of microtubule depolymerization 3/1105 27/16241 0.277564547  
 0.584396509 0.468253589 MAP1A/NAV3/STMN2 3  
 GO:0035902 BP response to immobilization stress 3/1105 27/16241 0.277564547  
 0.584396509 0.468253589 SLC8A1/REG1A/REN 3

GO:0048240 BP sperm capacitation 3/1105 27/162410.277564547 0.584396509  
0.468253589 DEFB1/SEMG1/SLC26A3 3

GO:0048710 BP regulation of astrocyte differentiation 3/1105 27/162410.277564547  
0.584396509 0.468253589 MAG/F2/NR2E1 3

GO:0072207 BP metanephric epithelium development 3/1105 27/162410.277564547  
0.584396509 0.468253589 ADIPOQ/WNT9B/WWTR1 3

GO:1902003 BP regulation of amyloid-beta formation 3/1105 27/162410.277564547  
0.584396509 0.468253589 APOE/IGF1/SPON1 3

GO:0030038 BP contractile actin filament bundle assembly 8/1105 91/162410.278241238  
0.585030836 0.46876185 ELN/MYOC/SFRP1/SORBS1/TAC1/TGFB3/TMEFF2/APOA1 8

GO:0043149 BP stress fiber assembly 8/1105 91/162410.278241238 0.585030836  
0.46876185 ELN/MYOC/SFRP1/SORBS1/TAC1/TGFB3/TMEFF2/APOA1 8

GO:0021879 BP forebrain neuron differentiation 5/1105 52/162410.278342236  
0.585030836 0.46876185 CSF1R/NRP2/SLIT2/LHX5/SALL1 5

GO:0072132 BP mesenchyme morphogenesis 5/1105 52/162410.278342236 0.585030836  
0.46876185 ACTA2/ACTG2/FGFR1/HEYL/BMP7 5

GO:0072175 BP epithelial tube formation 11/1105 131/16241 0.278551302  
0.585137575 0.468847376  
FGF10/IRX1/PRICKLE1/SFRP1/SFRP2/WNT9B/ZEB2/BMP7/FOLR1/GRHL3/TRIM71 11

GO:0046661 BP male sex differentiation 13/1105 158/16241 0.278750392 0.585137575  
0.468847376  
AR/DHH/FGF10/FLNA/PDGFRB/ROR2/SFRP1/SFRP2/UTF1/WNT9B/ZFPM2/HOXA11/REN 13

GO:1901568 BP fatty acid derivative metabolic process 13/1105 158/16241 0.278750392  
0.585137575 0.468847376  
CYP1B1/GGT5/PTGDS/PTGIS/AKR1C4/CYP2B6/CYP2C19/CYP2J2/CYP4F2/CYP4F8/GGT6/GST  
A1/PLA2G4F 13

GO:0045833 BP negative regulation of lipid metabolic process 7/1105 78/16241  
0.279751631 0.586737836 0.470129601  
APOE/CNR1/APOA2/APOBEC1/APOC3/UGT1A1/UGT1A8 7

GO:0051702 BP interaction with symbiont 7/1105 78/162410.279751631 0.586737836  
0.470129601 APOE/CSF1R/CTSG/ELANE/FN1/DEFA1/F2 7

GO:1901215 BP negative regulation of neuron death 16/1105 199/16241 0.280023327  
0.587057013 0.470385344  
APOE/AXL/EN1/GABRA5/GDF5/GPNMB/KIR3DL2/MAG/NEFL/NGF/NTRK2/SERPINF1/TGFB3/  
EPO/SLC30A10/TERT 16

GO:0006066 BP alcohol metabolic process 27/1105 351/16241 0.280503442  
0.587812675 0.470990826  
ADCYAP1R1/ADH1B/APOE/CYP1B1/CYP7B1/FGF2/FGFR1/IGF1/MOXD1/NUDT10/NUDT11/P  
LD4/ADH7/AKR1B10/AKR1C4/APOA1/APOA2/APOA4/APOA5/CEL/CYP3A4/MOGAT2/MOGAT3/PC  
K1/PCSK9/SULT2A1/TTR 27

GO:0046486 BP glycerolipid metabolic process 30/1105 393/16241 0.28131344  
0.589258686 0.472149458  
APOE/CHAT/CSF1R/FABP4/FGF2/HTR2A/PCYT1B/PDGFRB/PI4K2B/PLA2G2D/ALPI/APOA1/AP  
OA2/APOA4/APOA5/APOBEC1/APOC3/APOH/FABP1/FABP2/FABP6/G6PC/HTR2C/MOGAT2/MOG

AT3/PCK1/PCSK9/PLA2G2F/PLA2G4E/PLA2G4F 30

GO:0071902 BP positive regulation of protein serine/threonine kinase activity 25/1105  
324/16241 0.284750999 0.596204991 0.477715254  
ADIPOQ/ALK/CARTPT/CCL19/CSF1R/DKK1/ELANE/FGF10/FGF2/FGFR1/FLT3/GHR/HTR2A/IGF1/NGF/NRK/PDGFRB/PTPRC/ROR2/TCL1A/TGFB3/THBS1/TLR9/ZEB2/CXCL17 25

GO:0021915 BP neural tube development 13/1105 159/16241 0.286283806  
0.598903771 0.479877678  
DACT1/EN1/GLI2/GLI3/PRICKLE1/SALL2/SFRP1/SFRP2/ZEB2/BMP7/FOLR1/GRHL3/TRIM71 13

GO:0097479 BP synaptic vesicle localization 13/1105 159/16241 0.286283806  
0.598903771 0.479877678  
CAMK2A/CDH2/CHRM2/CHRNA6/CNR1/GRIK5/HTR2A/NLGN1/PRKCB/SNAP91/SYNDIG1/SYT11/SYT4 13

GO:0009268 BP response to pH 4/1105 40/16241 0.288249427 0.601231829  
0.481743059 KCNK4/SERPINF1/NOX1/PCK1 4

GO:0010559 BP regulation of glycoprotein biosynthetic process 4/1105 40/16241  
0.288249427 0.601231829 0.481743059 CCL19/CCL21/CCR7/IGF1 4

GO:0014002 BP astrocyte development 4/1105 40/16241 0.288249427 0.601231829  
0.481743059 C1QA/PLP1/ROR2/VIM 4

GO:0045429 BP positive regulation of nitric oxide biosynthetic process 4/1105 40/16241  
0.288249427 0.601231829 0.481743059 AGTR2/ITGB2/KLRC4-KLRK1/AGXT2 4

GO:0060043 BP regulation of cardiac muscle cell proliferation 4/1105 40/16241  
0.288249427 0.601231829 0.481743059 FGF2/FGFR1/KCNK2/ZFPM2 4

GO:0060412 BP ventricular septum morphogenesis 4/1105 40/16241 0.288249427  
0.601231829 0.481743059 HEYL/SLIT2/SLIT3/ZFPM2 4

GO:0045621 BP positive regulation of lymphocyte differentiation 8/1105 92/16241  
0.288253452 0.601231829 0.481743059 AXL/CCL19/GLI2/GLI3/IL12B/LILRB4/PTPRC/IHH 8

GO:0048145 BP regulation of fibroblast proliferation 7/1105 79/16241 0.290626068  
0.605666206 0.485296148 AGTR2/DDR2/FGF10/FN1/IGF1/PDGFRB/SFRP1 7

GO:0060415 BP muscle tissue morphogenesis 7/1105 79/16241 0.290626068 0.605666206  
0.485296148 COL11A1/COL3A1/HEG1/MYL3/MYLK/ZFPM2/FOXH1 7

GO:0006749 BP glutathione metabolic process 5/1105 53/16241 0.291768346  
0.607273777 0.48658423 GGT5/GGT6/GSTA1/GSTA2/GSTA3 5

GO:0060113 BP inner ear receptor cell differentiation 5/1105 53/16241 0.291768346  
0.607273777 0.48658423 FGFR1/GABRA5/ADGRV1/ATOH1/USH1G 5

GO:1902369 BP negative regulation of RNA catabolic process 5/1105 53/16241  
0.291768346 0.607273777 0.48658423 DAZL/RBM24/VIP/APOBEC1/IGF2BP1 5

GO:0035914 BP skeletal muscle cell differentiation 6/1105 66/16241 0.292042872  
0.607330477 0.486629662 ASB2/EGR2/HEYL/MYOC/CD/RBM24/SMYD1 6

GO:1904888 BP cranial skeletal system development 6/1105 66/16241 0.292042872  
0.607330477 0.486629662 GLI3/PRRX1/SIX2/TGFB3/TIFAB/WNT9B 6

GO:0043523 BP regulation of neuron apoptotic process 16/1105 201/16241 0.293490089  
0.607521993 0.486783115

APOE/AXL/EN1/EPHA7/GABRA5/GDF5/GRIK5/KCNB1/MAG/NEFL/NGF/NTRK2/TGFB3/PCSK9  
 /SLC30A10/TERT 16  
 GO:0007143 BP female meiotic nuclear division 3/1105 28/162410.296568138  
 0.607521993 0.486783115 DAZL/FMN2/MEIKIN 3  
 GO:0008209 BP androgen metabolic process 3/1105 28/162410.296568138 0.607521993  
 0.486783115 AKR1C4/CYP3A4/HSD3B1 3  
 GO:0014741 BP negative regulation of muscle hypertrophy 3/1105 28/162410.296568138  
 0.607521993 0.486783115 IGFBP5/PI16/RGS4 3  
 GO:0021696 BP cerebellar cortex morphogenesis 3/1105 28/162410.296568138  
 0.607521993 0.486783115 CBLN1/GLI2/LHX5 3  
 GO:0030511 BP positive regulation of transforming growth factor beta receptor signaling  
 pathway 3/1105 28/162410.296568138 0.607521993 0.486783115  
 MYOCD/TGFB11/THBS1 3  
 GO:0032660 BP regulation of interleukin-17 production 3/1105 28/162410.296568138  
 0.607521993 0.486783115 IL12B/IL21/IL36RN 3  
 GO:0033032 BP regulation of myeloid cell apoptotic process 3/1105 28/162410.296568138  
 0.607521993 0.486783115 ADIPOQ/APOH/EPO 3  
 GO:0044319 BP wound healing, spreading of cells 3/1105 28/162410.296568138  
 0.607521993 0.486783115 COL5A1/FLNA/TMEFF2 3  
 GO:0055094 BP response to lipoprotein particle 3/1105 28/162410.296568138  
 0.607521993 0.486783115 APOE/ITGB2/ADTRP 3  
 GO:0090505 BP epiboly involved in wound healing 3/1105 28/162410.296568138  
 0.607521993 0.486783115 COL5A1/FLNA/TMEFF2 3  
 GO:0098901 BP regulation of cardiac muscle cell action potential 3/1105 28/16241  
 0.296568138 0.607521993 0.486783115 ANK2/CTNNA3/FLNA 3  
 GO:1900181 BP negative regulation of protein localization to nucleus 3/1105 28/16241  
 0.296568138 0.607521993 0.486783115 DCLK1/LILRB4/TRIM40 3  
 GO:1903846 BP positive regulation of cellular response to transforming growth factor beta  
 stimulus 3/1105 28/162410.296568138 0.607521993 0.486783115  
 MYOCD/TGFB11/THBS1 3  
 GO:0000097 BP sulfur amino acid biosynthetic process 2/1105 16/162410.297824299  
 0.607521993 0.486783115 BHMT2/CDO1 2  
 GO:0003222 BP ventricular trabecula myocardium morphogenesis 2/1105 16/16241  
 0.297824299 0.607521993 0.486783115 HEG1/FOXH1 2  
 GO:0006586 BP indolalkylamine metabolic process 2/1105 16/162410.297824299  
 0.607521993 0.486783115 IDO2/DDC 2  
 GO:0006750 BP glutathione biosynthetic process 2/1105 16/162410.297824299  
 0.607521993 0.486783115 GGT5/GGT6 2  
 GO:0007567 BP parturition 2/1105 16/162410.297824299 0.607521993 0.486783115  
 NRK/PTGFR 2  
 GO:0009070 BP serine family amino acid biosynthetic process 2/1105 16/16241  
 0.297824299 0.607521993 0.486783115 AGXT/AGXT2 2  
 GO:0014048 BP regulation of glutamate secretion 2/1105 16/162410.297824299  
 0.607521993 0.486783115 NPY5R/SYT4 2

GO:0022038 BP corpus callosum development 2/1105 16/162410.297824299  
0.607521993 0.486783115 PTPRS/ZEB2 2

GO:0030889 BP negative regulation of B cell proliferation 2/1105 16/162410.297824299  
0.607521993 0.486783115 FCGR2B/TNFRSF13B 2

GO:0031268 BP pseudopodium organization 2/1105 16/162410.297824299 0.607521993  
0.486783115 CCL21/CCR7 2

GO:0032780 BP negative regulation of ATPase activity 2/1105 16/162410.297824299  
0.607521993 0.486783115 PLN/TLR92

GO:0035461 BP vitamin transmembrane transport 2/1105 16/162410.297824299  
0.607521993 0.486783115 FOLR2/FOLR1 2

GO:0040037 BP negative regulation of fibroblast growth factor receptor signaling pathway  
2/1105 16/162410.297824299 0.607521993 0.486783115 SULF1/THBS1 2

GO:0044065 BP regulation of respiratory system process 2/1105 16/162410.297824299  
0.607521993 0.486783115 ATP1A2/NLGN1 2

GO:0048791 BP calcium ion-regulated exocytosis of neurotransmitter 2/1105 16/16241  
0.297824299 0.607521993 0.486783115 SYT11/SYT4 2

GO:0050711 BP negative regulation of interleukin-1 secretion 2/1105 16/16241  
0.297824299 0.607521993 0.486783115 APOA1/CARD18 2

GO:0051447 BP negative regulation of meiotic cell cycle 2/1105 16/162410.297824299  
0.607521993 0.486783115 NPPC/OVOL1 2

GO:0051923 BP sulfation 2/1105 16/162410.297824299 0.607521993 0.486783115  
CHST5/SULT2A1 2

GO:0061158 BP 3'-UTR-mediated mRNA destabilization 2/1105 16/162410.297824299  
0.607521993 0.486783115 RBM24/TRIM71 2

GO:0061548 BP ganglion development 2/1105 16/162410.297824299 0.607521993  
0.486783115 NRP2/RGS4 2

GO:0071871 BP response to epinephrine 2/1105 16/162410.297824299 0.607521993  
0.486783115 ADIPOQ/PENK2

GO:0072176 BP nephric duct development 2/1105 16/162410.297824299 0.607521993  
0.486783115 EPHA7/WNT9B 2

GO:0090185 BP negative regulation of kidney development 2/1105 16/162410.297824299  
0.607521993 0.486783115 ADIPOQ/BMP7 2

GO:0099509 BP regulation of presynaptic cytosolic calcium ion concentration 2/1105  
16/162410.297824299 0.607521993 0.486783115 ATP2B2/CNR1 2

GO:1900221 BP regulation of amyloid-beta clearance 2/1105 16/162410.297824299  
0.607521993 0.486783115 APOE/MYOC2 2

GO:1900242 BP regulation of synaptic vesicle endocytosis 2/1105 16/162410.297824299  
0.607521993 0.486783115 NLGN1/SYT11 2

GO:1901881 BP positive regulation of protein depolymerization 2/1105 16/16241  
0.297824299 0.607521993 0.486783115 ACTN2/STMN2 2

GO:1905153 BP regulation of membrane invagination 2/1105 16/162410.297824299  
0.607521993 0.486783115 RAB31/SYT11 2

GO:1905331 BP negative regulation of morphogenesis of an epithelium 2/1105  
16/162410.297824299 0.607521993 0.486783115 SULF1/BMP7 2

GO:1990000 BP amyloid fibril formation 2/1105 16/162410.297824299 0.607521993  
0.486783115 APOE/CRYAB 2

GO:2000369 BP regulation of clathrin-dependent endocytosis 2/1105 16/16241  
0.297824299 0.607521993 0.486783115 SNAP91/SYT11 2

GO:2001224 BP positive regulation of neuron migration 2/1105 16/162410.297824299  
0.607521993 0.486783115 FLNA/RELN 2

GO:0120034 BP positive regulation of plasma membrane bounded cell projection assembly  
8/1105 93/162410.298354062 0.608350001 0.487446566  
CCL19/CCL21/CCR7/DPYSL3/GPM6A/NLGN1/P2RY12/TGFB3 8

GO:0071356 BP cellular response to tumor necrosis factor 21/1105 271/16241  
0.299171926 0.609764524 0.488579966  
ADIPOQ/AKAP12/CCL13/CCL14/CCL19/CCL21/CLIP3/COL1A1/FABP4/SFRP1/TCL1A/THBS1/T  
NFRSF13B/TNFSF8/VCAM1/ABCC2/APOA1/CCL15/CCL20/LCN2/PCK1 21

GO:0036294 BP cellular response to decreased oxygen levels 16/1105 202/16241  
0.300298443 0.611806699 0.490216279  
ANGPT4/CPEB1/CYBB/FMN2/KCNK2/KCNK3/KCNMB1/PTGIS/SFRP1/SLC8A1/BMP7/EPO/FAB  
P1/GNGT1/PCK1/TERT 16

GO:0048144 BP fibroblast proliferation 7/1105 80/162410.301594795 0.614193049  
0.492128366 AGTR2/DDR2/FGF10/FN1/IGF1/PDGFRB/SFRP1 7

GO:0000096 BP sulfur amino acid metabolic process 4/1105 41/162410.303879253  
0.617528839 0.494801202 BHMT2/CDO1/GADL1/AGXT 4

GO:0003009 BP skeletal muscle contraction 4/1105 41/162410.303879253 0.617528839  
0.494801202 CASQ1/STAC/SYNM/TNNT3 4

GO:0017145 BP stem cell division 4/1105 41/162410.303879253 0.617528839  
0.494801202 FGFR1/NAP1L2/SFRP2/WWTR1 4

GO:0032459 BP regulation of protein oligomerization 4/1105 41/162410.303879253  
0.617528839 0.494801202 APOE/CRYAB/TCL1A/MMP3 4

GO:1904407 BP positive regulation of nitric oxide metabolic process 4/1105 41/16241  
0.303879253 0.617528839 0.494801202 AGTR2/ITGB2/KLRC4-KLRK1/AGXT2 4

GO:0010324 BP membrane invagination 6/1105 67/162410.304112838 0.617528839  
0.494801202 FCGR2B/ITGB2/RAB31/SYT11/THBS1/XKR4 6

GO:1903391 BP regulation of adherens junction organization 6/1105 67/16241  
0.304112838 0.617528839 0.494801202 EPHA3/MYOC/SFRP1/THBS1/THY1/HRG 6

GO:0032663 BP regulation of interleukin-2 production 5/1105 54/162410.305303663  
0.619179023 0.496123429 CCR2/NAV3/PTPRC/VSIG4/IL17F 5

GO:0042220 BP response to cocaine 5/1105 54/162410.305303663 0.619179023  
0.496123429 CNR1/HTR2A/HTR3A/RGS4/PPP1R1B 5

GO:0046164 BP alcohol catabolic process 5/1105 54/162410.305303663 0.619179023  
0.496123429 APOE/ADH7/AKR1B10/CEL/SULT2A1 5

GO:0030316 BP osteoclast differentiation 8/1105 94/162410.308534787 0.625448778  
0.501147133 CARTPT/CSF1R/FBN1/IL12B/LILRB4/SFRP1/EFNA2/IL17A 8

GO:0007043 BP cell-cell junction assembly 10/1105 121/16241 0.308649804  
0.625448778 0.501147133  
ANK2/CDH10/CDH11/CDH19/CDH2/HEG1/NFASC/PECAM1/CDH17/DSG1 10

GO:0045582 BP positive regulation of T cell differentiation 7/1105 81/162410.312647224  
0.633287903 0.507428311 CCL19/GLI2/GLI3/IL12B/LILRB4/PTPRC/IHH 7

GO:0003016 BP respiratory system process 3/1105 29/162410.315642507 0.636990959  
0.510395421 ATP1A2/NDN/NLGN1 3

GO:0006691 BP leukotriene metabolic process 3/1105 29/162410.315642507  
0.636990959 0.510395421 GGT5/CYP4F2/GGT6 3

GO:0042759 BP long-chain fatty acid biosynthetic process 3/1105 29/162410.315642507  
0.636990959 0.510395421 PLP1/QKI/CYP3A4 3

GO:0046640 BP regulation of alpha-beta T cell proliferation 3/1105 29/162410.315642507  
0.636990959 0.510395421 CCR2/IL12B/PTPRC 3

GO:0050849 BP negative regulation of calcium-mediated signaling 3/1105 29/16241  
0.315642507 0.636990959 0.510395421 CASQ2/CD22/MYOZ2 3

GO:0060441 BP epithelial tube branching involved in lung morphogenesis 3/1105  
29/162410.315642507 0.636990959 0.510395421 FGF10/RSPO2/TNC 3

GO:0060765 BP regulation of androgen receptor signaling pathway 3/1105 29/16241  
0.315642507 0.636990959 0.510395421 HEYL/SFRP1/FOXH1 3

GO:0070528 BP protein kinase C signaling 3/1105 29/162410.315642507 0.636990959  
0.510395421 AKAP12/SEZ6L/ADGRV1 3

GO:0090504 BP epiboly 3/1105 29/162410.315642507 0.636990959 0.510395421  
COL5A1/FLNA/TMEFF2 3

GO:0050851 BP antigen receptor-mediated signaling pathway 18/1105 232/16241  
0.315776776 0.637000216 0.510402839  
BLK/CCR7/CD22/CMTM3/FCGR2B/HLA-DPA1/HLA-DPB1/HLA-DQA1/HLA-DQA2/HLA-DQB2/L  
ILRB4/MS4A1/PRKCB/PTPRC/THY1/BTNL3/BTNL8/HHLA2 18

GO:0006809 BP nitric oxide biosynthetic process 6/1105 68/162410.316269912  
0.63720993 0.510570874 AGTR2/CYP1B1/ITGB2/KLRC4-KLRK1/PTGIS/AGXT2 6

GO:0050766 BP positive regulation of phagocytosis 6/1105 68/162410.316269912  
0.63720993 0.510570874 FCGR2B/PTPRC/RAB31/TUB/APOA1/APOA2 6

GO:0050891 BP multicellular organismal water homeostasis 6/1105 68/162410.316269912  
0.63720993 0.510570874 ADCY2/ADCY5/FLG/KRT1/CYP4F2/GRHL3 6

GO:0048709 BP oligodendrocyte differentiation 8/1105 95/162410.318787339  
0.640988705 0.513598656 GLI3/MAG/NTRK2/PLP1/PRDM8/SOX10/TENM4/NKX6-2 8

GO:0062014 BP negative regulation of small molecule metabolic process 8/1105  
95/162410.318787339 0.640988705 0.513598656  
ADIPOQ/APOE/ATCAY/CNR1/APOC3/MLXIPL/PDZD3/UGT1A8 8

GO:0003229 BP ventricular cardiac muscle tissue development 5/1105 55/16241  
0.318928419 0.640988705 0.513598656 COL11A1/HEG1/MYL3/ZFPM2/FOXH1 5

GO:0032722 BP positive regulation of chemokine production 5/1105 55/16241  
0.318928419 0.640988705 0.513598656 ADCYAP1/ADIPOQ/CSF1R/TLR7/TLR9 5

GO:0043388 BP positive regulation of DNA binding 5/1105 55/162410.318928419  
0.640988705 0.513598656 HAND2/IGF1/MYOC/NGF/NEUROD1 5

GO:0071398 BP cellular response to fatty acid 5/1105 55/162410.318928419 0.640988705  
0.513598656 KCNK4/PTGDR/PTGFR/SFRP1/TNC 5

GO:0031641 BP regulation of myelination 4/1105 42/162410.319596902 0.641544742

0.514044186 MAG/SOX10/TENM4/NKX6-2 4  
 GO:0043616 BP keratinocyte proliferation 4/1105 42/162410.319596902 0.641544742  
 0.514044186 FGF10/FGF7/REG3A/REG3G 4  
 GO:0060999 BP positive regulation of dendritic spine development 4/1105 42/16241  
 0.319596902 0.641544742 0.514044186 APOE/NLGN1/RELN/SHANK1 4  
 GO:0071453 BP cellular response to oxygen levels 17/1105 219/16241 0.321748838  
 0.641926886 0.514350383  
 ANGPT4/CPEB1/CYBB/FMN2/KCNK2/KCNK3/KCNMB1/PTGIS/SFRP1/SLC8A1/BMP7/EPO/FAB  
 P1/GNGT1/NOX1/PCK1/TERT 17  
 GO:0097191 BP extrinsic apoptotic signaling pathway 17/1105 219/16241 0.321748838  
 0.641926886 0.514350383  
 AGTR2/AR/FGF10/FGFR1/IGF1/NGF/PTPRC/SERPINE1/SFRP1/SFRP2/THBS1/TIMP3/FGA/FGB  
 /FGG/LCN2/TERT 17  
 GO:0061387 BP regulation of extent of cell growth 9/1105 109/16241 0.323318268  
 0.641926886 0.514350383 APOE/CXCL12/EPHA7/FN1/MAG/NGF/PLXNA4/PTPRS/TNR 9  
 GO:0003184 BP pulmonary valve morphogenesis 2/1105 17/162410.323577152  
 0.641926886 0.514350383 HEYL/SLIT2 2  
 GO:0007379 BP segment specification 2/1105 17/162410.323577152 0.641926886  
 0.514350383 IRX1/MEOX2 2  
 GO:0010224 BP response to UV-B 2/1105 17/162410.323577152 0.641926886  
 0.514350383 IL12B/MFAP4 2  
 GO:0010523 BP negative regulation of calcium ion transport into cytosol 2/1105  
 17/162410.323577152 0.641926886 0.514350383 CASQ2/EPO 2  
 GO:0021756 BP striatum development 2/1105 17/162410.323577152 0.641926886  
 0.514350383 FOXP2/SLITRK5 2  
 GO:0030502 BP negative regulation of bone mineralization 2/1105 17/162410.323577152  
 0.641926886 0.514350383 GREM1/FGF232  
 GO:0030540 BP female genitalia development 2/1105 17/162410.323577152  
 0.641926886 0.514350383 AXL/FGF10 2  
 GO:0031000 BP response to caffeine 2/1105 17/162410.323577152 0.641926886  
 0.514350383 CASQ2/SLC8A1 2  
 GO:0031649 BP heat generation 2/1105 17/162410.323577152 0.641926886  
 0.514350383 CNR1/PTGER3 2  
 GO:0031998 BP regulation of fatty acid beta-oxidation 2/1105 17/162410.323577152  
 0.641926886 0.514350383 CNR1/FABP1 2  
 GO:0032693 BP negative regulation of interleukin-10 production 2/1105 17/16241  
 0.323577152 0.641926886 0.514350383 FCGR2B/IL12B 2  
 GO:0032740 BP positive regulation of interleukin-17 production 2/1105 17/16241  
 0.323577152 0.641926886 0.514350383 IL12B/IL21 2  
 GO:0036270 BP response to diuretic 2/1105 17/162410.323577152 0.641926886  
 0.514350383 CASQ2/SLC8A1 2  
 GO:0042693 BP muscle cell fate commitment 2/1105 17/162410.323577152 0.641926886  
 0.514350383 DKK1/FGF10 2  
 GO:0043651 BP linoleic acid metabolic process 2/1105 17/162410.323577152

0.641926886 0.514350383 CYP2J2/GSTA1 2  
 GO:0043931 BP ossification involved in bone maturation 2/1105 17/162410.323577152  
 0.641926886 0.514350383 GREM1/IGF1 2  
 GO:0045187 BP regulation of circadian sleep/wake cycle, sleep 2/1105 17/16241  
 0.323577152 0.641926886 0.514350383 KCNA2/PTGDS 2  
 GO:0045725 BP positive regulation of glycogen biosynthetic process 2/1105 17/16241  
 0.323577152 0.641926886 0.514350383 IGF1/SORBS1 2  
 GO:0051969 BP regulation of transmission of nerve impulse 2/1105 17/162410.323577152  
 0.641926886 0.514350383 CARTPT/TNR 2  
 GO:0060850 BP regulation of transcription involved in cell fate commitment 2/1105  
 17/162410.323577152 0.641926886 0.514350383 EVX1/NKX6-2 2  
 GO:0061298 BP retina vasculature development in camera-type eye 2/1105 17/16241  
 0.323577152 0.641926886 0.514350383 CYP1B1/PDGFRB 2  
 GO:0071071 BP regulation of phospholipid biosynthetic process 2/1105 17/16241  
 0.323577152 0.641926886 0.514350383 HTR2A/HTR2C 2  
 GO:0071435 BP potassium ion export 2/1105 17/162410.323577152 0.641926886  
 0.514350383 KCNA5/KCNE4 2  
 GO:0097623 BP potassium ion export across plasma membrane 2/1105 17/16241  
 0.323577152 0.641926886 0.514350383 KCNA5/KCNE4 2  
 GO:1900017 BP positive regulation of cytokine production involved in inflammatory response  
 2/1105 17/162410.323577152 0.641926886 0.514350383 IL17A/IL17F 2  
 GO:1900409 BP positive regulation of cellular response to oxidative stress 2/1105  
 17/162410.323577152 0.641926886 0.514350383 MMP3/NOX1 2  
 GO:0045682 BP regulation of epidermis development 7/1105 82/162410.323772807  
 0.642055724 0.514453615 PTCH2/SFRP4/ATOH1/FOXN1/REG3A/REG3G/SERPINB13 7  
 GO:0001736 BP establishment of planar polarity 10/1105 123/16241 0.326713228  
 0.647102975 0.518497776  
 DACT1/DKK1/PRICKLE1/PRICKLE2/ROR2/RSPO3/SFRP1/SFRP2/WNT9B/GRHL3 10  
 GO:0001838 BP embryonic epithelial tube formation 10/1105 123/16241 0.326713228  
 0.647102975 0.518497776  
 IRX1/PRICKLE1/SFRP1/SFRP2/WNT9B/ZEB2/BMP7/FOLR1/GRHL3/TRIM71 10  
 GO:0007164 BP establishment of tissue polarity 10/1105 123/16241 0.326713228  
 0.647102975 0.518497776  
 DACT1/DKK1/PRICKLE1/PRICKLE2/ROR2/RSPO3/SFRP1/SFRP2/WNT9B/GRHL3 10  
 GO:0001707 BP mesoderm formation 6/1105 69/162410.328500163 0.649856141  
 0.520703779 DKK1/FGFR1/SFRP2/SIX2/BMP7/HOXA11 6  
 GO:0014015 BP positive regulation of gliogenesis 6/1105 69/162410.328500163  
 0.649856141 0.520703779 CCR2/MAG/P2RY12/SOX10/TENM4/NKX6-2 6  
 GO:0033077 BP T cell differentiation in thymus 6/1105 69/162410.328500163  
 0.649856141 0.520703779 CCR7/GLI2/GLI3/PTPRC/FOXN1/IHH 6  
 GO:0034612 BP response to tumor necrosis factor 22/1105 290/16241 0.328839822  
 0.650266186 0.521032331  
 ADIPOQ/AFF3/AKAP12/CCL13/CCL14/CCL19/CCL21/CLIP3/COL1A1/FABP4/SFRP1/TCL1A/TH  
 BS1/TNFRSF13B/TNFSF8/VCAM1/ABCC2/APOA1/CCL15/CCL20/LCN2/PCK1 22

GO:0014020 BP primary neural tube formation 8/1105 96/162410.32910344  
0.650525593 0.521240184 PRICKLE1/SFRP1/SFRP2/ZEB2/BMP7/FOLR1/GRHL3/TRIM71  
8

GO:0006633 BP fatty acid biosynthetic process 12/1105 151/16241 0.331209793  
0.654425786 0.524365253  
ADIPOQ/PLP1/PTGDS/PTGIS/QKI/APOA4/APOA5/APOC3/CYP3A4/FADS6/MLXIPL/PLA2G4F  
12

GO:0031295 BP T cell costimulation 5/1105 56/162410.332623223 0.65695427  
0.526391226 CCL19/CCL21/CCR7/KLRK4-KLRK1/HLA2 5

GO:0002251 BP organ or tissue specific immune response 3/1105 30/162410.334737182  
0.657888526 0.527139808 APOA4/DEFA1/DEFB1 3

GO:0030947 BP regulation of vascular endothelial growth factor receptor signaling pathway  
3/1105 30/162410.334737182 0.657888526 0.527139808 EMILIN1/FGF10/PRKCB 3

GO:0032728 BP positive regulation of interferon-beta production 3/1105 30/16241  
0.334737182 0.657888526 0.527139808 TLR7/TLR8/TLR9 3

GO:0045879 BP negative regulation of smoothened signaling pathway 3/1105 30/16241  
0.334737182 0.657888526 0.527139808 GLI3/PTCH2/RFX4 3

GO:0045920 BP negative regulation of exocytosis 3/1105 30/162410.334737182  
0.657888526 0.527139808 CCR2/FCGR2B/SYT4 3

GO:0050869 BP negative regulation of B cell activation 3/1105 30/162410.334737182  
0.657888526 0.527139808 FCGR2B/SFRP1/TNFRSF13B 3

GO:0061311 BP cell surface receptor signaling pathway involved in heart development  
3/1105 30/162410.334737182 0.657888526 0.527139808 DKK1/HAND2/HEYL3

GO:0071402 BP cellular response to lipoprotein particle stimulus 3/1105 30/16241  
0.334737182 0.657888526 0.527139808 APOE/ITGB2/ADTRP 3

GO:0097421 BP liver regeneration 3/1105 30/162410.334737182 0.657888526  
0.527139808 GLI3/IHH/REG1A 3

GO:0150077 BP regulation of neuroinflammatory response 3/1105 30/162410.334737182  
0.657888526 0.527139808 IGF1/PTPRC/MMP33

GO:1901661 BP quinone metabolic process 3/1105 30/162410.334737182 0.657888526  
0.527139808 AKR1B10/AKR1C4/CYP4F2 3

GO:0032602 BP chemokine production 7/1105 83/162410.334961062 0.657888526  
0.527139808 ACKR1/ADCYAP1/ADIPOQ/CSF1R/ELANE/TLR7/TLR9 7

GO:0030810 BP positive regulation of nucleotide biosynthetic process 4/1105 43/16241  
0.335373141 0.657888526 0.527139808 HTR2A/IGF1/GUCA2A/MLXIPL 4

GO:0035307 BP positive regulation of protein dephosphorylation 4/1105 43/16241  
0.335373141 0.657888526 0.527139808 AGTR2/PDGFRB/PTPRC/PPP1R14D 4

GO:0042269 BP regulation of natural killer cell mediated cytotoxicity 4/1105 43/16241  
0.335373141 0.657888526 0.527139808 CRTAM/IL12B/IL21/KLRK4-KLRK1 4

GO:0090278 BP negative regulation of peptide hormone secretion 4/1105 43/16241  
0.335373141 0.657888526 0.527139808 CARTPT/KCNB1/SFRP1/NPFF 4

GO:1900373 BP positive regulation of purine nucleotide biosynthetic process 4/1105  
43/162410.335373141 0.657888526 0.527139808 HTR2A/IGF1/GUCA2A/MLXIPL 4

GO:0002822 BP regulation of adaptive immune response based on somatic recombination of

immune receptors built from immunoglobulin superfamily domains 11/1105 138/16241  
0.337921524 0.662622964 0.530933324  
CCL19/CCR2/CD1C/CLC/CLEC4G/CR1/FCER2/FCGR2B/IL12B/PTPRC/C4BPB 11  
GO:0071900 BP regulation of protein serine/threonine kinase activity 36/1105 490/16241  
0.339265645 0.664993156 0.532832464  
ADIPOQ/ALK/APOE/CARTPT/CCL19/CCNA1/CSF1R/DKK1/ELANE/FGF10/FGF2/FGFR1/FLT3/G  
HR/HEG1/HTR2A/IGF1/MYOC/NGF/NRK/PDGFRB/PTPRC/RGS4/ROR2/SFRP1/SFRP2/TCL1A/TGF  
B3/THBS1/THY1/TLR9/UCLH1/ZEB2/BMP7/CNTD2/CXCL17 36  
GO:0043507 BP positive regulation of JUN kinase activity 6/1105 70/162410.340789839  
0.667714275 0.535012788 CCL19/DKK1/NRK/ROR2/TLR9/ZEB2 6  
GO:0045089 BP positive regulation of innate immune response 27/1105 363/16241  
0.342886693 0.6715548 0.538090047  
CLEC10A/CLEC4C/CLEC6A/COLEC12/CRTAM/FCN1/IL12B/IL21/ITGB2/KLRK4-KLRK1/LILRA4/P  
TPRS/TLR7/TLR8/TLR9/DMBT1/FGA/FGB/FGG/MUC15/MUC17/MUC21/MUC4/PGLYRP3/PGLYRP  
4/REG3G/S100A14 27  
GO:0014897 BP striated muscle hypertrophy 7/1105 84/162410.3462016 0.674538768  
0.540480982 AGTR2/HAND2/IGF1/IGFBP5/MYOC/PI16/RGS4 7  
GO:0042446 BP hormone biosynthetic process 7/1105 84/162410.3462016  
0.674538768 0.540480982 CHAT/CHST8/HSD11B1/TPO/CYP3A4/DUOX2/HSD3B1 7  
GO:1903426 BP regulation of reactive oxygen species biosynthetic process 7/1105  
84/162410.3462016 0.674538768 0.540480982  
AGTR2/ITGB2/KLRK4-KLRK1/PTGIS/AGXT2/DUOXA2/SLC30A10 7  
GO:0001885 BP endothelial cell development 5/1105 57/162410.34636912 0.674538768  
0.540480982 COL4A4/HEG1/PECAM1/PTPRS/S1PR3 5  
GO:0016266 BP O-glycan processing 5/1105 57/162410.34636912 0.674538768  
0.540480982 GXYLT2/MUC15/MUC17/MUC21/MUC4 5  
GO:0031294 BP lymphocyte costimulation 5/1105 57/162410.34636912 0.674538768  
0.540480982 CCL19/CCL21/CCR7/KLRK4-KLRK1/HLA2 5  
GO:0035306 BP positive regulation of dephosphorylation 5/1105 57/162410.34636912  
0.674538768 0.540480982 AGTR2/PDGFRB/PTPRC/CHP2/PPP1R14D 5  
GO:0045428 BP regulation of nitric oxide biosynthetic process 5/1105 57/16241  
0.34636912 0.674538768 0.540480982 AGTR2/ITGB2/KLRK4-KLRK1/PTGIS/AGXT2 5  
GO:0030879 BP mammary gland development 11/1105 139/16241 0.346609552  
0.674538768 0.540480982  
AR/CDO1/CSF1R/FGF10/GLI2/GLI3/IGFBP5/NRG3/TGFB3/ATP2C2/XDH 11  
GO:0001911 BP negative regulation of leukocyte mediated cytotoxicity 2/1105 18/16241  
0.349079305 0.674538768 0.540480982 FCGR2B/PTPRC 2  
GO:0003085 BP negative regulation of systemic arterial blood pressure 2/1105  
18/162410.349079305 0.674538768 0.540480982 ADRB3/AGTR2 2  
GO:0006534 BP cysteine metabolic process 2/1105 18/162410.349079305 0.674538768  
0.540480982 CDO1/AGXT 2  
GO:0006704 BP glucocorticoid biosynthetic process 2/1105 18/162410.349079305  
0.674538768 0.540480982 HSD11B1/HSD3B1 2  
GO:0007252 BP I-kappaB phosphorylation 2/1105 18/162410.349079305 0.674538768

0.540480982 TLR7/TLR9 2  
 GO:0008090 BP retrograde axonal transport 2/1105 18/162410.349079305 0.674538768  
 0.540480982 MAP1A/NEFL 2  
 GO:0010766 BP negative regulation of sodium ion transport 2/1105 18/162410.349079305  
 0.674538768 0.540480982 ATP1A2/PCSK9 2  
 GO:0019184 BP nonribosomal peptide biosynthetic process 2/1105 18/162410.349079305  
 0.674538768 0.540480982 GGT5/GGT6 2  
 GO:0019370 BP leukotriene biosynthetic process 2/1105 18/162410.349079305  
 0.674538768 0.540480982 GGT5/GGT6 2  
 GO:0032303 BP regulation of icosanoid secretion 2/1105 18/162410.349079305  
 0.674538768 0.540480982 AGTR2/CYP4F2 2  
 GO:0034199 BP activation of protein kinase A activity 2/1105 18/162410.349079305  
 0.674538768 0.540480982 ADCY2/ADCY5 2  
 GO:0036120 BP cellular response to platelet-derived growth factor stimulus 2/1105  
 18/162410.349079305 0.674538768 0.540480982 HAS1/PDGFRB 2  
 GO:0036342 BP post-anal tail morphogenesis 2/1105 18/162410.349079305 0.674538768  
 0.540480982 RIPPLY2/SFRP2 2  
 GO:0044320 BP cellular response to leptin stimulus 2/1105 18/162410.349079305  
 0.674538768 0.540480982 FGB/FGF23 2  
 GO:0045683 BP negative regulation of epidermis development 2/1105 18/16241  
 0.349079305 0.674538768 0.540480982 REG3A/REG3G 2  
 GO:0046655 BP folic acid metabolic process 2/1105 18/162410.349079305 0.674538768  
 0.540480982 FOLR2/FOLR1 2  
 GO:0048739 BP cardiac muscle fiber development 2/1105 18/162410.349079305  
 0.674538768 0.540480982 MYH11/SGCD 2  
 GO:0051450 BP myoblast proliferation 2/1105 18/162410.349079305 0.674538768  
 0.540480982 IGF1/KCNA5 2  
 GO:0070633 BP transepithelial transport 2/1105 18/162410.349079305 0.674538768  
 0.540480982 RHBG/RHCG 2  
 GO:0070875 BP positive regulation of glycogen metabolic process 2/1105 18/16241  
 0.349079305 0.674538768 0.540480982 IGF1/SORBS1 2  
 GO:0071318 BP cellular response to ATP 2/1105 18/162410.349079305 0.674538768  
 0.540480982 P2RY12/P2RX3 2  
 GO:0072079 BP nephron tubule formation 2/1105 18/162410.349079305 0.674538768  
 0.540480982 IRX1/WNT9B 2  
 GO:1901741 BP positive regulation of myoblast fusion 2/1105 18/162410.349079305  
 0.674538768 0.540480982 CXCL9/EHD2 2  
 GO:1902074 BP response to salt 2/1105 18/162410.349079305 0.674538768  
 0.540480982 NEFL/FGF23 2  
 GO:1902884 BP positive regulation of response to oxidative stress 2/1105 18/16241  
 0.349079305 0.674538768 0.540480982 MMP3/NOX1 2  
 GO:0006493 BP protein O-linked glycosylation 8/1105 98/162410.349893353  
 0.67584591 0.541528343  
 GXYLT2/MGAT5B/ST8SIA6/TMTC1/MUC15/MUC17/MUC21/MUC4 8

GO:0032570 BP response to progesterone 4/1105 44/162410.351179841 0.677797792  
 0.543092308 SOX10/TGFB3/THBS1/DSG1 4  
 GO:0050913 BP sensory perception of bitter taste 4/1105 44/162410.351179841  
 0.677797792 0.543092308 CST2/REEP2/RTP5/TAS2R38 4  
 GO:0048332 BP mesoderm morphogenesis 6/1105 71/162410.353125406 0.67886338  
 0.543946121 DKK1/FGFR1/SFRP2/SIX2/BMP7/HOXA11 6  
 GO:0060411 BP cardiac septum morphogenesis 6/1105 71/162410.353125406  
 0.67886338 0.543946121 HEYL/NRP2/SLIT2/SLIT3/ZFPM2/BMP7 6  
 GO:0046394 BP carboxylic acid biosynthetic process 32/1105 436/16241 0.353186221  
 0.67886338 0.543946121  
 ADIPOQ/BGN/BHMT2/CDO1/CYP7B1/DCN/DSEL/GADL1/GGT5/HAS1/HTR2A/IGF1/PLP1/PT  
 GDS/PTGIS/QKI/VCAN/AGXT/AGXT2/AKR1C4/APOA4/APOA5/APOC3/ASPG/CYP3A4/FADS6/GGT6  
 /LDHC/MLXIPL/OTC/PAH/PLA2G4F 32  
 GO:0030513 BP positive regulation of BMP signaling pathway 3/1105 31/16241  
 0.353805019 0.67886338 0.543946121 GDF5/RNF165/SULF1 3  
 GO:0032692 BP negative regulation of interleukin-1 production 3/1105 31/16241  
 0.353805019 0.67886338 0.543946121 IGF1/APOA1/CARD18 3  
 GO:0034105 BP positive regulation of tissue remodeling 3/1105 31/162410.353805019  
 0.67886338 0.543946121 IL12B/IL21/HRG 3  
 GO:0045066 BP regulatory T cell differentiation 3/1105 31/162410.353805019  
 0.67886338 0.543946121 CR1/LILRB4/PLA2G2D 3  
 GO:0045730 BP respiratory burst 3/1105 31/162410.353805019 0.67886338  
 0.543946121 CYBB/MPO/NOX1 3  
 GO:0045987 BP positive regulation of smooth muscle contraction 3/1105 31/16241  
 0.353805019 0.67886338 0.543946121 MYOCD/SPX/TACR23  
 GO:0046471 BP phosphatidylglycerol metabolic process 3/1105 31/162410.353805019  
 0.67886338 0.543946121 PLA2G2D/PLA2G2F/PLA2G4F 3  
 GO:0046621 BP negative regulation of organ growth 3/1105 31/162410.353805019  
 0.67886338 0.543946121 KCNK2/PI16/RGS4 3  
 GO:0050650 BP chondroitin sulfate proteoglycan biosynthetic process 3/1105 31/16241  
 0.353805019 0.67886338 0.543946121 BGN/DCN/VCAN 3  
 GO:0051385 BP response to mineralocorticoid 3/1105 31/162410.353805019  
 0.67886338 0.543946121 CYBB/NEFL/HSD3B1 3  
 GO:0070306 BP lens fiber cell differentiation 3/1105 31/162410.353805019 0.67886338  
 0.543946121 VIM/ZEB2/SIX3 3  
 GO:1902692 BP regulation of neuroblast proliferation 3/1105 31/162410.353805019  
 0.67886338 0.543946121 GLI3/SOX10/SIX3 3  
 GO:0034614 BP cellular response to reactive oxygen species 12/1105 154/16241  
 0.356055415 0.682648009 0.546978593  
 AXL/CYP1B1/FBLN5/MMP2/MPO/NME8/SOD3/APOA4/BMP7/FABP1/LCN2/MMP3 12  
 GO:0043433 BP negative regulation of DNA-binding transcription factor activity 12/1105  
 154/16241 0.356055415 0.682648009 0.546978593  
 CMKLR1/CYP1B1/FLNA/HAND2/HEY1/PTGIS/SFRP4/TLR9/BMP7/FOXA2/FOXH1/TRIM40 12  
 GO:0030101 BP natural killer cell activation 7/1105 85/162410.357484148 0.684852627

0.548745065 AXL/IL12B/ITGB2/KLRC4-KLRK1/PTPRC/PGLYRP3/PGLYRP4 7  
 GO:0048644 BP muscle organ morphogenesis 7/1105 85/162410.357484148 0.684852627  
 0.548745065 COL11A1/COL3A1/HEG1/MYL3/MYLK/ZFPM2/FOXH1 7  
 GO:0016053 BP organic acid biosynthetic process 32/1105 437/16241 0.358131978  
 0.685826229 0.549525173  
 ADIPOQ/BGN/BHMT2/CDO1/CYP7B1/DCN/DSEL/GADL1/GGT5/HAS1/HTR2A/IGF1/PLP1/PT  
 GDS/PTGIS/QKI/VCAN/AGXT/AGXT2/AKR1C4/APOA4/APOA5/APOC3/ASPG/CYP3A4/FADS6/GGT6  
 /LDHC/MLXIPL/OTC/PAH/PLA2G4F 32  
 GO:0014743 BP regulation of muscle hypertrophy 5/1105 58/162410.360147646  
 0.689417473 0.552402694 HAND2/IGF1/IGFBP5/PI16/RGS4 5  
 GO:0002504 BP antigen processing and presentation of peptide or polysaccharide antigen via  
 MHC class II 8/1105 99/162410.360350833 0.689537706 0.552499032  
 FCGR2B/HLA-DOA/HLA-DPA1/HLA-DPB1/HLA-DQA1/HLA-DQA2/HLA-DQB2/THBS1 8  
 GO:0002220 BP innate immune response activating cell surface receptor signaling pathway  
 9/1105 113/16241 0.36222586 0.692585996 0.554941505  
 CLEC10A/CLEC4C/CLEC6A/FCN1/KLRC4-KLRK1/MUC15/MUC17/MUC21/MUC4 9  
 GO:0002761 BP regulation of myeloid leukocyte differentiation 9/1105 113/16241  
 0.36222586 0.692585996 0.554941505  
 ADIPOQ/C1QC/CARTPT/FBN1/IL12B/LILRB4/ROR2/SFRP1/IL17A 9  
 GO:0046209 BP nitric oxide metabolic process 6/1105 72/162410.36549358  
 0.69829034 0.559512168 AGTR2/CYP1B1/ITGB2/KLRC4-KLRK1/PTGIS/AGXT2 6  
 GO:1900006 BP positive regulation of dendrite development 6/1105 72/162410.36549358  
 0.69829034 0.559512168 ALK/APOE/NLGN1/RELN/SHANK1/BMP7 6  
 GO:0002715 BP regulation of natural killer cell mediated immunity 4/1105 45/16241  
 0.36699004 0.69951691 0.56049497 CRTAM/IL12B/IL21/KLRC4-KLRK1 4  
 GO:0042461 BP photoreceptor cell development 4/1105 45/162410.36699004  
 0.69951691 0.56049497 NTRK2/RORB/THY1/GNGT1 4  
 GO:0045776 BP negative regulation of blood pressure 4/1105 45/162410.36699004  
 0.69951691 0.56049497 ADIPOQ/ADRB3/AGTR2/CNR1 4  
 GO:0048701 BP embryonic cranial skeleton morphogenesis 4/1105 45/162410.36699004  
 0.69951691 0.56049497 PRRX1/SIX2/TGFB3/WNT9B 4  
 GO:0050435 BP amyloid-beta metabolic process 4/1105 45/162410.36699004  
 0.69951691 0.56049497 APOE/IGF1/SPON1/REN 4  
 GO:1903018 BP regulation of glycoprotein metabolic process 4/1105 45/16241  
 0.36699004 0.69951691 0.56049497 CCL19/CCL21/CCR7/IGF1 4  
 GO:0009791 BP post-embryonic development 7/1105 86/162410.368798572  
 0.701104079 0.561766705 EFEMP1/FBN1/FOXP2/HEG1/NDN/NPPC/EMX1 7  
 GO:0014896 BP muscle hypertrophy 7/1105 86/162410.368798572 0.701104079  
 0.561766705 AGTR2/HAND2/IGF1/IGFBP5/MYOC/PI16/RGS4 7  
 GO:0031098 BP stress-activated protein kinase signaling cascade 22/1105 297/16241  
 0.370746519 0.701104079 0.561766705  
 CCL19/CCL21/CCR7/CRYAB/DACT1/DKK1/FCGR2B/GDF6/HAND2/NRK/ROR2/SFRP1/SFRP2/T  
 LR9/ZEB2/AMBP/IL36G/IL36RN/IL37/KLHL31/NOX1/XDH 22  
 GO:0002573 BP myeloid leukocyte differentiation 15/1105 198/16241 0.371300826

0.701104079 0.561766705  
 ADIPOQ/C1QC/CARTPT/CCL19/CCR7/CEBPE/CSF1R/FBN1/IL12B/IL31RA/LILRB4/ROR2/SFRP  
 1/EFNA2/IL17A 15  
 GO:0019218 BP regulation of steroid metabolic process 9/1105 114/16241 0.37204409  
 0.701104079 0.561766705  
 AGTR1/APOE/DHH/APOA1/APOA2/APOA4/APOA5/UGT1A1/UGT1A8 9  
 GO:0007498 BP mesoderm development 10/1105 128/16241 0.372669738 0.701104079  
 0.561766705 DKK1/FGFR1/IKZF1/SFRP2/SIX2/ZFPM2/BMP7/FOXH1/HOXA11/OVOL1 10  
 GO:0001569 BP branching involved in blood vessel morphogenesis 3/1105 32/16241  
 0.372802196 0.701104079 0.561766705 EDNRA/SFRP2/IHH 3  
 GO:0002323 BP natural killer cell activation involved in immune response 3/1105  
 32/16241 0.372802196 0.701104079 0.561766705 IL12B/PGLYRP3/PGLYRP4 3  
 GO:0006739 BP NADP metabolic process 3/1105 32/16241 0.372802196 0.701104079  
 0.561766705 FMO1/FMO2/NOX1 3  
 GO:0010737 BP protein kinase A signaling 3/1105 32/16241 0.372802196 0.701104079  
 0.561766705 ADIPOQ/AKAP12/ADGRV1 3  
 GO:0032620 BP interleukin-17 production 3/1105 32/16241 0.372802196 0.701104079  
 0.561766705 IL12B/IL21/IL36RN 3  
 GO:0033028 BP myeloid cell apoptotic process 3/1105 32/16241 0.372802196  
 0.701104079 0.561766705 ADIPOQ/APOH/EPO 3  
 GO:0046633 BP alpha-beta T cell proliferation 3/1105 32/16241 0.372802196 0.701104079  
 0.561766705 CCR2/IL12B/PTPRC 3  
 GO:0046685 BP response to arsenic-containing substance 3/1105 32/16241 0.372802196  
 0.701104079 0.561766705 NEFL/SERPINF1/ABCC2 3  
 GO:0090322 BP regulation of superoxide metabolic process 3/1105 32/16241 0.372802196  
 0.701104079 0.561766705 FBLN5/ITGB2/BMP7 3  
 GO:0007405 BP neuroblast proliferation 5/1105 59/16241 0.373940866 0.701104079  
 0.561766705 FGFR1/GLI3/KCNA1/SOX10/SIX3 5  
 GO:0048857 BP neural nucleus development 5/1105 59/16241 0.373940866 0.701104079  
 0.561766705 FOXP2/GNB4/KIRREL3/PHOX2A/PLP1 5  
 GO:0099024 BP plasma membrane invagination 5/1105 59/16241 0.373940866  
 0.701104079 0.561766705 FCGR2B/ITGB2/RAB31/THBS1/XKR4 5  
 GO:0001573 BP ganglioside metabolic process 2/1105 19/16241 0.374245703  
 0.701104079 0.561766705 ST8SIA2/ST8SIA6 2  
 GO:0002076 BP osteoblast development 2/1105 19/16241 0.374245703 0.701104079  
 0.561766705 GLI2/TNN2  
 GO:0002313 BP mature B cell differentiation involved in immune response 2/1105  
 19/16241 0.374245703 0.701104079 0.561766705 FCGR2B/CDH17 2  
 GO:0002374 BP cytokine secretion involved in immune response 2/1105 19/16241  
 0.374245703 0.701104079 0.561766705 APOA1/APOA2 2  
 GO:0006525 BP arginine metabolic process 2/1105 19/16241 0.374245703 0.701104079  
 0.561766705 ART4/OTC 2  
 GO:0010310 BP regulation of hydrogen peroxide metabolic process 2/1105 19/16241  
 0.374245703 0.701104079 0.561766705 DUOX2/MMP3 2

GO:0010804 BP negative regulation of tumor necrosis factor-mediated signaling pathway  
2/1105 19/162410.374245703 0.701104079 0.561766705 ADIPOQ/APOA1 2

GO:0016137 BP glycoside metabolic process 2/1105 19/162410.374245703 0.701104079  
0.561766705 AKR1B10/AKR1C4 2

GO:0021533 BP cell differentiation in hindbrain 2/1105 19/162410.374245703  
0.701104079 0.561766705 CBLN1/LHX5 2

GO:0023019 BP signal transduction involved in regulation of gene expression 2/1105  
19/162410.374245703 0.701104079 0.561766705 FGF5/NEUROD1 2

GO:0030903 BP notochord development 2/1105 19/162410.374245703 0.701104079  
0.561766705 GLI2/NOTO 2

GO:0032462 BP regulation of protein homooligomerization 2/1105 19/162410.374245703  
0.701104079 0.561766705 APOE/CRYAB 2

GO:0032793 BP positive regulation of CREB transcription factor activity 2/1105  
19/162410.374245703 0.701104079 0.561766705 EPHA5/RELN 2

GO:0036119 BP response to platelet-derived growth factor 2/1105 19/162410.374245703  
0.701104079 0.561766705 HAS1/PDGFRB 2

GO:0045076 BP regulation of interleukin-2 biosynthetic process 2/1105 19/16241  
0.374245703 0.701104079 0.561766705 PTPRC/IL17F 2

GO:0051546 BP keratinocyte migration 2/1105 19/162410.374245703 0.701104079  
0.561766705 FGF10/FGF7 2

GO:0051580 BP regulation of neurotransmitter uptake 2/1105 19/162410.374245703  
0.701104079 0.561766705 ATP1A2/RGS4 2

GO:0060004 BP reflex 2/1105 19/162410.374245703 0.701104079 0.561766705  
FOXP2/SHANK1 2

GO:0060457 BP negative regulation of digestive system process 2/1105 19/16241  
0.374245703 0.701104079 0.561766705 PTGER3/TIFAB 2

GO:0070989 BP oxidative demethylation 2/1105 19/162410.374245703 0.701104079  
0.561766705 CYP3A4/CYP3A43 2

GO:0071636 BP positive regulation of transforming growth factor beta production 2/1105  
19/162410.374245703 0.701104079 0.561766705 LUM/THBS1 2

GO:0090208 BP positive regulation of triglyceride metabolic process 2/1105 19/16241  
0.374245703 0.701104079 0.561766705 APOA4/APOA5 2

GO:0097062 BP dendritic spine maintenance 2/1105 19/162410.374245703 0.701104079  
0.561766705 APOE/FCGR2B 2

GO:1902644 BP tertiary alcohol metabolic process 2/1105 19/162410.374245703  
0.701104079 0.561766705 AKR1B10/AKR1C4 2

GO:1903055 BP positive regulation of extracellular matrix organization 2/1105 19/16241  
0.374245703 0.701104079 0.561766705 DDR2/EMILIN1 2

GO:1905939 BP regulation of gonad development 2/1105 19/162410.374245703  
0.701104079 0.561766705 RETN/ZFPM2 2

GO:2001014 BP regulation of skeletal muscle cell differentiation 2/1105 19/16241  
0.374245703 0.701104079 0.561766705 MYOCD/RBM24 2

GO:0051851 BP modification by host of symbiont morphology or physiology 6/1105  
73/162410.377881356 0.707645148 0.567007802 APOE/CSF1R/CTSG/ELANE/DEFA1/F2

GO:0007266 BP Rho protein signal transduction 15/1105 199/16241 0.378741926  
0.708986411 0.568082503  
AGTR1/APOE/ARHGEF25/COL1A2/COL3A1/GPR174/HEG1/MYOC/NGFR/P2RY10/PDGFRB/PE  
CAM1/APOA1/APOC3/RHOV 15

GO:0007338 BP single fertilization 11/1105 143/16241 0.381688994 0.713959001  
0.572066841  
ADAM21/AR/FOLR2/LCN6/PRND/SYT6/AKAP4/DEFB126/HOXA11/LYZL4/TEX101 11

GO:0090263 BP positive regulation of canonical Wnt signaling pathway 11/1105  
143/16241 0.381688994 0.713959001 0.572066841  
ADGRA2/COL1A1/DACT1/FGF10/ROR2/RSPO1/RSPO2/RSPO3/SFRP1/SFRP2/SFRP4 11

GO:0043277 BP apoptotic cell clearance 4/1105 46/16241 0.382777996 0.714907041  
0.572826467 AXL/FCN1/THBS1/XKR4 4

GO:0046638 BP positive regulation of alpha-beta T cell differentiation 4/1105 46/16241  
0.382777996 0.714907041 0.572826467 CCL19/GLI3/IL12B/IHH 4

GO:0048512 BP circadian behavior 4/1105 46/16241 0.382777996 0.714907041  
0.572826467 KCNA2/NLGN1/PTGDS/SIX3 4

GO:1902808 BP positive regulation of cell cycle G1/S phase transition 4/1105 46/16241  
0.382777996 0.714907041 0.572826467 ADAMTS1/FGF10/KCNA5/TERT 4

GO:0003170 BP heart valve development 5/1105 60/16241 0.387731421 0.723883215  
0.580018717 ELN/EMILIN1/HEYL/SLIT2/SLIT3 5

GO:0001659 BP temperature homeostasis 13/1105 172/16241 0.388555482  
0.72487069 0.580809941  
ADCYAP1/ADIPOQ/ADRB3/CCR2/CMKLR1/CNR1/EBF2/FABP4/HTR2A/NPR3/PTGER3/LCN2/Y  
BX2 13

GO:0009566 BP fertilization 13/1105 172/16241 0.388555482 0.72487069  
0.580809941  
ADAM21/AR/ATP1A4/FOLR2/LCN6/PRND/RIMBP3B/SYT6/AKAP4/DEFB126/HOXA11/LYZL4/T  
EX101 13

GO:0030104 BP water homeostasis 6/1105 74/16241 0.39027604 0.726575673  
0.582176076 ADCY2/ADCY5/FLG/KRT1/CYP4F2/GRHL3 6

GO:1900182 BP positive regulation of protein localization to nucleus 6/1105 74/16241  
0.39027604 0.726575673 0.582176076 FLNA/GLI3/NGFR/CHP2/F2/TERT 6

GO:0051402 BP neuron apoptotic process 17/1105 229/16241 0.39062417  
0.726575673 0.582176076  
APOE/AXL/EN1/EPHA7/GABRA5/GDF5/GRIK5/KCNB1/MAG/NEFL/NGF/NGFR/NTRK2/TGFB3  
/PCSK9/SLC30A10/TERT 17

GO:0072329 BP monocarboxylic acid catabolic process 10/1105 130/16241 0.391255178  
0.726575673 0.582176076  
ADIPOQ/CNR1/ADTRP/AGXT/AGXT2/CEL/CYP4F2/FABP1/PCK1/SULT2A1 10

GO:0009164 BP nucleoside catabolic process 3/1105 33/16241 0.391688188 0.726575673  
0.582176076 DPYS/NT5C1A/APOBEC1 3

GO:0010039 BP response to iron ion 3/1105 33/16241 0.391688188 0.726575673  
0.582176076 C1QA/CYBRD1/TFR2 3

GO:0018345 BP protein palmitoylation 3/1105 33/162410.391688188 0.726575673  
0.582176076 CLIP3/ZDHHC11/ZDHHC11B 3

GO:0030851 BP granulocyte differentiation 3/1105 33/162410.391688188 0.726575673  
0.582176076 ADIPOQ/C1QC/CEBPE 3

GO:0034205 BP amyloid-beta formation 3/1105 33/162410.391688188 0.726575673  
0.582176076 APOE/IGF1/SPON1 3

GO:0034383 BP low-density lipoprotein particle clearance 3/1105 33/162410.391688188  
0.726575673 0.582176076 ADIPOQ/APOC3/PCSK9 3

GO:0070884 BP regulation of calcineurin-NFAT signaling cascade 3/1105 33/16241  
0.391688188 0.726575673 0.582176076 IGF1/MYOZ2/CHP2 3

GO:0097484 BP dendrite extension 3/1105 33/162410.391688188 0.726575673  
0.582176076 CACNG7/SYT4/REG1A 3

GO:0106056 BP regulation of calcineurin-mediated signaling 3/1105 33/162410.391688188  
0.726575673 0.582176076 IGF1/MYOZ2/CHP2 3

GO:1902991 BP regulation of amyloid precursor protein catabolic process 3/1105  
33/162410.391688188 0.726575673 0.582176076 APOE/IGF1/SPON1 3

GO:2001171 BP positive regulation of ATP biosynthetic process 3/1105 33/16241  
0.391688188 0.726575673 0.582176076 HTR2A/IGF1/MLXIPL 3

GO:1901617 BP organic hydroxy compound biosynthetic process 19/1105 258/16241  
0.394133704 0.730836072 0.585589764  
ADCYAP1R1/AGTR2/APOE/CYP7B1/FGF2/HAND2/MOXD1/ZEB2/AKR1C4/APOA1/APOA4/AP  
OA5/CYP3A4/DDC/LDHC/PAH/PCK1/PNMT/SLC45A2 19

GO:0001913 BP T cell mediated cytotoxicity 4/1105 47/162410.398519226 0.734873516  
0.588824806 CD1C/FCGR2B/IL12B/PTPRC 4

GO:0042551 BP neuron maturation 4/1105 47/162410.398519226 0.734873516  
0.588824806 ADGRB3/C1QA/MYOC/NFASC4

GO:0009235 BP cobalamin metabolic process 2/1105 20/162410.399004004 0.734873516  
0.588824806 PRSS1/PRSS3 2

GO:0021697 BP cerebellar cortex formation 2/1105 20/162410.399004004 0.734873516  
0.588824806 CBLN1/LHX5 2

GO:0032816 BP positive regulation of natural killer cell activation 2/1105 20/16241  
0.399004004 0.734873516 0.588824806 AXL/IL12B 2

GO:0043046 BP DNA methylation involved in gamete generation 2/1105 20/16241  
0.399004004 0.734873516 0.588824806 CTCFL/TDRD5 2

GO:0048148 BP behavioral response to cocaine 2/1105 20/162410.399004004  
0.734873516 0.588824806 HTR2A/PPP1R1B 2

GO:0048245 BP eosinophil chemotaxis 2/1105 20/162410.399004004 0.734873516  
0.588824806 CCL13/CCL15 2

GO:0050802 BP circadian sleep/wake cycle, sleep 2/1105 20/162410.399004004  
0.734873516 0.588824806 KCNA2/PTGDS 2

GO:0050860 BP negative regulation of T cell receptor signaling pathway 2/1105  
20/162410.399004004 0.734873516 0.588824806 LILRB4/THY1 2

GO:0051900 BP regulation of mitochondrial depolarization 2/1105 20/162410.399004004  
0.734873516 0.588824806 DCN/MYOC 2

GO:0060602 BP branch elongation of an epithelium 2/1105 20/162410.399004004  
0.734873516 0.588824806 FGF10/TNC 2

GO:0060713 BP labyrinthine layer morphogenesis 2/1105 20/162410.399004004  
0.734873516 0.588824806 RSPO3/BMP7 2

GO:0070935 BP 3'-UTR-mediated mRNA stabilization 2/1105 20/162410.399004004  
0.734873516 0.588824806 DAZL/RBM24 2

GO:0070977 BP bone maturation 2/1105 20/162410.399004004 0.734873516  
0.588824806 GREM1/IGF1 2

GO:0072111 BP cell proliferation involved in kidney development 2/1105 20/16241  
0.399004004 0.734873516 0.588824806 PDGFRB/BMP7 2

GO:1900273 BP positive regulation of long-term synaptic potentiation 2/1105 20/16241  
0.399004004 0.734873516 0.588824806 IGSF11/RELN 2

GO:1901739 BP regulation of myoblast fusion 2/1105 20/162410.399004004 0.734873516  
0.588824806 CXCL9/EHD2 2

GO:0048871 BP multicellular organismal homeostasis 34/1105 474/16241 0.399318723  
0.735177498 0.589068375  
ADCY2/ADCY5/ADCYAP1/ADIPOQ/ADRB3/AKT3/CARTPT/CCR2/CMKLR1/CNR1/CSF1R/EBF2/  
FABP4/FLG/HTR2A/KRT1/NDN/NPR3/PTGER3/SERPINA3/TLR9/TMEM119/TUB/WWTR1/ADGRV1  
/CYP4F2/GRHL3/IHH/LCN2/MLXIPL/MUC4/NEUROD1/USH1G/YBX2 34

GO:0001947 BP heart looping 5/1105 61/162410.401502556 0.7382952 0.591566465  
HAND2/FOLR1/FOXH1/IHH/NOTO 5

GO:0002260 BP lymphocyte homeostasis 5/1105 61/162410.401502556 0.7382952  
0.591566465 GAPT/GPR174/LMO1/TNFRSF13B/FOXN1 5

GO:0035773 BP insulin secretion involved in cellular response to glucose stimulus 5/1105  
61/162410.401502556 0.7382952 0.591566465 ADCY5/EPHA5/PTPRN/FOXA2/RFX6  
5

GO:0046718 BP viral entry into host cell 9/1105 117/16241 0.40161335 0.7382952  
0.591566465 AXL/CLEC4G/CR1/CR2/FCN1/HTR2A/MRC1/NCAM1/CLDN9 9

GO:0051261 BP protein depolymerization 8/1105 103/16241 0.402410992  
0.73888054 0.592035475 ACTN2/ADD2/LMOD1/MAP1A/NAV3/STMN2/STMN4/STMND1  
8

GO:0031110 BP regulation of microtubule polymerization or depolymerization 6/1105  
75/162410.402665268 0.73888054 0.592035475  
CLIP3/MAP1A/NAV3/STMN2/STMN4/STMND1 6

GO:0045638 BP negative regulation of myeloid cell differentiation 6/1105 75/16241  
0.402665268 0.73888054 0.592035475 ADIPOQ/C1QC/CARTPT/FBN1/LILRB4/SFRP16

GO:2001057 BP reactive nitrogen species metabolic process 6/1105 75/162410.402665268  
0.73888054 0.592035475 AGTR2/CYP1B1/ITGB2/KLRC4-KLRK1/PTGIS/AGXT2 6

GO:0001843 BP neural tube closure 7/1105 89/162410.402834301 0.73888054  
0.592035475 PRICKLE1/SFRP1/SFRP2/ZEB2/FOLR1/GRHL3/TRIM71 7

GO:0048010 BP vascular endothelial growth factor receptor signaling pathway 7/1105  
89/162410.402834301 0.73888054 0.592035475  
AXL/CYBB/EMILIN1/FGF10/NRP2/PRKCB/SULF1 7

GO:0035148 BP tube formation 11/1105 146/16241 0.408211231 0.748463445

0.599713874  
 FGF10/IRX1/PRICKLE1/SFRP1/SFRP2/WNT9B/ZEB2/BMP7/FOLR1/GRHL3/TRIM71 11  
 GO:0042542 BP response to hydrogen peroxide 10/1105 132/16241 0.409891239  
 0.751263346 0.601957323  
 AXL/COL1A1/CRYAB/CYP1B1/GNAO1/KCNA5/PDGFRB/SLC8A1/FABP1/LCN2 10  
 GO:0019432 BP triglyceride biosynthetic process 3/1105 34/162410.410425708  
 0.751401818 0.602068275 MOGAT2/MOGAT3/PCK1 3  
 GO:0043368 BP positive T cell selection 3/1105 34/162410.410425708 0.751401818  
 0.602068275 IL12B/PTPRC/FOXN1 3  
 GO:0097242 BP amyloid-beta clearance 3/1105 34/162410.410425708 0.751401818  
 0.602068275 APOE/ITGB2/MYOC 3  
 GO:0001841 BP neural tube formation 8/1105 104/16241 0.412944722 0.75573192  
 0.605537812 PRICKLE1/SFRP1/SFRP2/ZEB2/BMP7/FOLR1/GRHL3/TRIM71 8  
 GO:0007015 BP actin filament organization 27/1105 376/16241 0.413885833  
 0.756883896 0.606460845  
 ACTN2/ADD2/CCL21/CCR7/CXCL12/DPYSL3/ELN/FLNA/FMN2/GAS7/LMOD1/MAGEL2/MYO  
 C/PDLIM3/RGS4/SFRP1/SHANK1/SLIT2/SORBS1/SYNPO2/TAC1/TGFB3/TMEFF2/TPM2/WIPF1/AP  
 OA1/RHOV 27  
 GO:0032648 BP regulation of interferon-beta production 4/1105 48/162410.414190536  
 0.756883896 0.606460845 PTPRS/TLR7/TLR8/TLR9 4  
 GO:0046622 BP positive regulation of organ growth 4/1105 48/162410.414190536  
 0.756883896 0.606460845 FGF2/FGFR1/IGF1/ZFPM2 4  
 GO:0051445 BP regulation of meiotic cell cycle 4/1105 48/162410.414190536  
 0.756883896 0.606460845 DAZL/NPPC/PDE3A/OVOL1 4  
 GO:0008344 BP adult locomotory behavior 6/1105 76/162410.415037034 0.757670805  
 0.607091364 ATP1A2/CXCL12/EN1/SEZ6L/UCHL1/FOXA2 6  
 GO:0043462 BP regulation of ATPase activity 6/1105 76/162410.415037034 0.757670805  
 0.607091364 FGF10/MYL3/PLN/TLR9/TNNT3/TPM2 6  
 GO:0032623 BP interleukin-2 production 5/1105 62/162410.415238153 0.757670805  
 0.607091364 CCR2/NAV3/PTPRC/VSIG4/IL17F 5  
 GO:0035418 BP protein localization to synapse 5/1105 62/162410.415238153  
 0.757670805 0.607091364 LRRTM1/MAP1A/NLGN1/NRXN2/SHANK1 5  
 GO:0046777 BP protein autophosphorylation 17/1105 233/16241 0.418707411  
 0.763717342 0.611936213  
 ADIPOQ/ALK/BLK/CAMK2A/CSF1R/DDR2/EPHA7/FGFR1/FLT3/GFRA2/GPNMB/GREM1/NTR  
 K2/PDGFRB/PTPRC/SLA/THY1 17  
 GO:0003177 BP pulmonary valve development 2/1105 21/162410.423293244  
 0.766955521 0.614530836 HEYL/SLIT2 2  
 GO:0005980 BP glycogen catabolic process 2/1105 21/162410.423293244 0.766955521  
 0.614530836 PYGM/G6PC 2  
 GO:0007398 BP ectoderm development 2/1105 21/162410.423293244 0.766955521  
 0.614530836 GRHL3/KRT6B 2  
 GO:0016553 BP base conversion or substitution editing 2/1105 21/162410.423293244  
 0.766955521 0.614530836 A1CF/APOBEC1 2

GO:0016556 BP mRNA modification 2/1105 21/162410.423293244 0.766955521  
 0.614530836 A1CF/APOBEC1 2  
 GO:0031290 BP retinal ganglion cell axon guidance 2/1105 21/162410.423293244  
 0.766955521 0.614530836 EPHA7/SLIT2 2  
 GO:0035024 BP negative regulation of Rho protein signal transduction 2/1105 21/16241  
 0.423293244 0.766955521 0.614530836 HEG1/MYOC 2  
 GO:0042438 BP melanin biosynthetic process 2/1105 21/162410.423293244 0.766955521  
 0.614530836 ZEB2/SLC45A2 2  
 GO:0045624 BP positive regulation of T-helper cell differentiation 2/1105 21/16241  
 0.423293244 0.766955521 0.614530836 CCL19/IL12B 2  
 GO:0045932 BP negative regulation of muscle contraction 2/1105 21/162410.423293244  
 0.766955521 0.614530836 ATP1A2/KCNMA1 2  
 GO:0046339 BP diacylglycerol metabolic process 2/1105 21/162410.423293244  
 0.766955521 0.614530836 APOA2/MOGAT2 2  
 GO:0051412 BP response to corticosterone 2/1105 21/162410.423293244 0.766955521  
 0.614530836 NEFL/HSD3B1 2  
 GO:0051497 BP negative regulation of stress fiber assembly 2/1105 21/162410.423293244  
 0.766955521 0.614530836 MYOC/TMEFF2 2  
 GO:0051882 BP mitochondrial depolarization 2/1105 21/162410.423293244 0.766955521  
 0.614530836 DCN/MYOC 2  
 GO:0060055 BP angiogenesis involved in wound healing 2/1105 21/162410.423293244  
 0.766955521 0.614530836 SERPINE1/SMOC2 2  
 GO:0072010 BP glomerular epithelium development 2/1105 21/162410.423293244  
 0.766955521 0.614530836 ADIPOQ/PECAM1 2  
 GO:1901223 BP negative regulation of NIK/NF-kappaB signaling 2/1105 21/16241  
 0.423293244 0.766955521 0.614530836 BMP7/TRIM402  
 GO:2000738 BP positive regulation of stem cell differentiation 2/1105 21/16241  
 0.423293244 0.766955521 0.614530836 RBM24/BMP7 2  
 GO:0045185 BP maintenance of protein location 8/1105 105/16241 0.423470854  
 0.766994407 0.614561994 FBN1/FLNA/GRIK5/IGSF11/LTBP1/SHANK1/SYNE1/SUN3 8  
 GO:1901216 BP positive regulation of neuron death 7/1105 91/162410.425506499  
 0.770397318 0.61728861 C1QA/DKK1/EPHA7/FCGR2B/GRIK5/ITGB2/PCSK9 7  
 GO:0048489 BP synaptic vesicle transport 11/1105 148/16241 0.42592514  
 0.770587215 0.617440768  
 CAMK2A/CHRM2/CHRNA6/CNR1/GRIK5/HTR2A/NLGN1/PRKCB/SNAP91/SYT11/SYT4 11  
 GO:0097480 BP establishment of synaptic vesicle localization 11/1105 148/16241  
 0.42592514 0.770587215 0.617440768  
 CAMK2A/CHRM2/CHRNA6/CNR1/GRIK5/HTR2A/NLGN1/PRKCB/SNAP91/SYT11/SYT4 11  
 GO:0051492 BP regulation of stress fiber assembly 6/1105 77/162410.427379706  
 0.772649657 0.619093319 MYOC/SFRP1/TAC1/TGFB3/TMEFF2/APOA1 6  
 GO:1901879 BP regulation of protein depolymerization 6/1105 77/162410.427379706  
 0.772649657 0.619093319 ACTN2/ADD2/LMOD1/MAP1A/NAV3/STMN2 6  
 GO:0014855 BP striated muscle cell proliferation 5/1105 63/162410.428922753  
 0.77298344 0.619360767 FGF2/FGFR1/KCNK2/TENM4/ZFPM2 5

GO:0000578 BP embryonic axis specification 3/1105 35/162410.428980631 0.77298344  
0.619360767 RIPPLY2/TIFAB/TDRD5 3

GO:0021587 BP cerebellum morphogenesis 3/1105 35/162410.428980631 0.77298344  
0.619360767 CBLN1/GLI2/LHX5 3

GO:0031111 BP negative regulation of microtubule polymerization or depolymerization  
3/1105 35/162410.428980631 0.77298344 0.619360767 CLIP3/NAV3/STMN2 3

GO:0045740 BP positive regulation of DNA replication 3/1105 35/162410.428980631  
0.77298344 0.619360767 FGF10/FGFR1/GLI2 3

GO:0048246 BP macrophage chemotaxis 3/1105 35/162410.428980631 0.77298344  
0.619360767 CMKLR1/THBS1/CXCL17 3

GO:0050931 BP pigment cell differentiation 3/1105 35/162410.428980631 0.77298344  
0.619360767 GLI3/SOX10/ZEB2 3

GO:0071312 BP cellular response to alkaloid 3/1105 35/162410.428980631 0.77298344  
0.619360767 CASQ2/SLC8A1/DDC 3

GO:2000279 BP negative regulation of DNA biosynthetic process 3/1105 35/16241  
0.428980631 0.77298344 0.619360767 ADIPOQ/KCNK2/NPPC 3

GO:0032608 BP interferon-beta production 4/1105 49/162410.429770035 0.772988068  
0.619364475 PTPRS/TLR7/TLR8/TLR9 4

GO:0032731 BP positive regulation of interleukin-1 beta production 4/1105 49/16241  
0.429770035 0.772988068 0.619364475 CCL19/TLR8/ORM1/ORM2 4

GO:0034656 BP nucleobase-containing small molecule catabolic process 4/1105  
49/162410.429770035 0.772988068 0.619364475 DPYS/NT5C1A/APOBEC1/ENTPD8 4

GO:1903793 BP positive regulation of anion transport 4/1105 49/162410.429770035  
0.772988068 0.619364475 APOE/SYT4/APOA1/CYP4F2 4

GO:1990090 BP cellular response to nerve growth factor stimulus 4/1105 49/16241  
0.429770035 0.772988068 0.619364475 NGF/NTRK2/STMN2/TAC1 4

GO:0120032 BP regulation of plasma membrane bounded cell projection assembly 12/1105  
163/16241 0.431842598 0.776431493 0.622123554  
CCL19/CCL21/CCR7/DPYSL3/GAP43/GPM6A/NLGN1/P2RY12/SLIT2/TGFB3/HRG/NOTO 12

GO:0071236 BP cellular response to antibiotic 10/1105 135/16241 0.437848169  
0.786941166 0.630544535  
ADCY2/ADCY5/AXL/CYBB/CYP1B1/KCNMB1/FABP1/LCN2/PLA2G4F/UGT1A1 10

GO:0002088 BP lens development in camera-type eye 6/1105 78/162410.439682046  
0.78937069 0.632491216 CRYAB/UNC45B/VIM/ZEB2/CRYBA2/SIX3 6

GO:0032088 BP negative regulation of NF-kappaB transcription factor activity 6/1105  
78/162410.439682046 0.78937069 0.632491216  
CMKLR1/CYP1B1/PTGIS/TLR9/BMP7/TRIM40 6

GO:0071260 BP cellular response to mechanical stimulus 6/1105 78/162410.439682046  
0.78937069 0.632491216 ATP1A2/COL1A1/KCNK4/MAG/TLR7/TLR8 6

GO:0032387 BP negative regulation of intracellular transport 5/1105 64/162410.442541575  
0.791884503 0.634505434 ADIPOQ/CRYAB/PLN/SYT4/PCSK9 5

GO:0090398 BP cellular senescence 5/1105 64/162410.442541575 0.791884503  
0.634505434 AKT3/MAGEA2/MAGEA2B/SLC30A10/TERT 5

GO:1901607 BP alpha-amino acid biosynthetic process 5/1105 64/162410.442541575

0.791884503 0.634505434 BHMT2/AGXT/AGXT2/OTC/PAH 5  
 GO:0050732 BP negative regulation of peptidyl-tyrosine phosphorylation 4/1105  
 50/162410.445237149 0.791884503 0.634505434 PTPRC/SFRP1/SFRP2/THY1 4  
 GO:0001919 BP regulation of receptor recycling 2/1105 22/162410.447062633  
 0.791884503 0.634505434 BVES/PCSK9 2  
 GO:0002052 BP positive regulation of neuroblast proliferation 2/1105 22/16241  
 0.447062633 0.791884503 0.634505434 GLI3/SOX10 2  
 GO:0006541 BP glutamine metabolic process 2/1105 22/162410.447062633 0.791884503  
 0.634505434 GFPT2/GLYATL1 2  
 GO:0006582 BP melanin metabolic process 2/1105 22/162410.447062633 0.791884503  
 0.634505434 ZEB2/SLC45A2 2  
 GO:0009251 BP glucan catabolic process 2/1105 22/162410.447062633 0.791884503  
 0.634505434 PYGM/G6PC 2  
 GO:0021680 BP cerebellar Purkinje cell layer development 2/1105 22/162410.447062633  
 0.791884503 0.634505434 SEZ6L/LHX5 2  
 GO:0031281 BP positive regulation of cyclase activity 2/1105 22/162410.447062633  
 0.791884503 0.634505434 TIMP2/GUCA2A 2  
 GO:0031342 BP negative regulation of cell killing 2/1105 22/162410.447062633  
 0.791884503 0.634505434 FCGR2B/PTPRC 2  
 GO:0033233 BP regulation of protein sumoylation 2/1105 22/162410.447062633  
 0.791884503 0.634505434 MAGEA2/MAGEA2B 2  
 GO:0034505 BP tooth mineralization 2/1105 22/162410.447062633 0.791884503  
 0.634505434 ASPN/COL1A1 2  
 GO:0034643 BP establishment of mitochondrion localization, microtubule-mediated 2/1105  
 22/162410.447062633 0.791884503 0.634505434 NEFL/UCHL1 2  
 GO:0042094 BP interleukin-2 biosynthetic process 2/1105 22/162410.447062633  
 0.791884503 0.634505434 PTPRC/IL17F 2  
 GO:0042401 BP cellular biogenic amine biosynthetic process 2/1105 22/162410.447062633  
 0.791884503 0.634505434 MOXD1/DDC 2  
 GO:0042537 BP benzene-containing compound metabolic process 2/1105 22/16241  
 0.447062633 0.791884503 0.634505434 IDO2/UGT1A1 2  
 GO:0043950 BP positive regulation of cAMP-mediated signaling 2/1105 22/16241  
 0.447062633 0.791884503 0.634505434 ADCYAP1/ADCYAP1R1 2  
 GO:0044321 BP response to leptin 2/1105 22/162410.447062633 0.791884503  
 0.634505434 FGB/FGF23 2  
 GO:0044458 BP motile cilium assembly 2/1105 22/162410.447062633 0.791884503  
 0.634505434 AKAP4/NOTO 2  
 GO:0046058 BP cAMP metabolic process 2/1105 22/162410.447062633 0.791884503  
 0.634505434 ADCY2/ADCY5 2  
 GO:0047497 BP mitochondrion transport along microtubule 2/1105 22/162410.447062633  
 0.791884503 0.634505434 NEFL/UCHL1 2  
 GO:0051354 BP negative regulation of oxidoreductase activity 2/1105 22/16241  
 0.447062633 0.791884503 0.634505434 AOC3/CNR1 2  
 GO:0060307 BP regulation of ventricular cardiac muscle cell membrane repolarization

2/1105 22/162410.447062633 0.791884503 0.634505434 ANK2/KCNE4 2  
 GO:0071157 BP negative regulation of cell cycle arrest 2/1105 22/162410.447062633  
 0.791884503 0.634505434 FGF10/MLXIPL2  
 GO:0090189 BP regulation of branching involved in ureteric bud morphogenesis 2/1105  
 22/162410.447062633 0.791884503 0.634505434 AGTR2/SIX2 2  
 GO:1901984 BP negative regulation of protein acetylation 2/1105 22/162410.447062633  
 0.791884503 0.634505434 MAGEA2/MAGEA2B 2  
 GO:0008584 BP male gonad development 10/1105 136/16241 0.447147486  
 0.791884503 0.634505434  
 AR/DHH/FLNA/PDGFRB/SFRP1/SFRP2/UTF1/ZFPM2/HOXA11/REN 10  
 GO:0003091 BP renal water homeostasis 3/1105 36/162410.4473219 0.791884503  
 0.634505434 ADCY2/ADCY5/CYP4F2 3  
 GO:0030212 BP hyaluronan metabolic process 3/1105 36/162410.4473219  
 0.791884503 0.634505434 FGF2/HAS1/ITIH5 3  
 GO:0033146 BP regulation of intracellular estrogen receptor signaling pathway 3/1105  
 36/162410.4473219 0.791884503 0.634505434 AR/CYP7B1/FOXH1 3  
 GO:0035137 BP hindlimb morphogenesis 3/1105 36/162410.4473219 0.791884503  
 0.634505434 AFF3/GDF5/RSPO2 3  
 GO:0046460 BP neutral lipid biosynthetic process 3/1105 36/162410.4473219  
 0.791884503 0.634505434 MOGAT2/MOGAT3/PCK1 3  
 GO:0046463 BP acylglycerol biosynthetic process 3/1105 36/162410.4473219  
 0.791884503 0.634505434 MOGAT2/MOGAT3/PCK1 3  
 GO:0046676 BP negative regulation of insulin secretion 3/1105 36/162410.4473219  
 0.791884503 0.634505434 KCNB1/SFRP1/NPFF 3  
 GO:0060428 BP lung epithelium development 3/1105 36/162410.4473219 0.791884503  
 0.634505434 FGF10/FGF7/FOXP23  
 GO:2000273 BP positive regulation of signaling receptor activity 3/1105 36/16241  
 0.4473219 0.791884503 0.634505434 CCR2/GREM1/RELN 3  
 GO:0043687 BP post-translational protein modification 25/1105 353/16241 0.447369604  
 0.791884503 0.634505434  
 APOE/ASB2/ASB5/CCDC8/CDH2/CHRD1/FBN1/FN1/FSTL1/IGFBP4/IGFBP5/LTBP1/PENK/PR  
 SS23/SPARCL1/TNC/VCAN/APOA1/APOA2/APOA5/FGA/FGF23/FGG/PCSK9/SERPINA10 25  
 GO:0046620 BP regulation of organ growth 7/1105 93/162410.448079335 0.792855078  
 0.635283117 FGF2/FGFR1/IGF1/KCNK2/PI16/RGS4/ZFPM2 7  
 GO:0060491 BP regulation of cell projection assembly 12/1105 165/16241 0.44873471  
 0.793728806 0.635983201  
 CCL19/CCL21/CCR7/DPYSL3/GAP43/GPM6A/NLGN1/P2RY12/SLIT2/TGFB3/HRG/NOTO 12  
 GO:1905954 BP positive regulation of lipid localization 6/1105 79/162410.451933222  
 0.799098627 0.640285824 ADIPOQ/APOE/RETN/TAC1/APOA1/CYP4F2 6  
 GO:0043401 BP steroid hormone mediated signaling pathway 13/1105 180/16241  
 0.453315369 0.801254081 0.642012903  
 AR/CYP7B1/HEYL/RORB/RXRG/SFRP1/TGFB11/BMP7/DEFA1/FOXH1/NR1I2/NR2E1/SCGB2A  
 1 13  
 GO:0040014 BP regulation of multicellular organism growth 5/1105 65/162410.456080533

0.805851647 0.645696748 GDF5/GHR/IGF1/NPPC/NPY1R 5  
 GO:0035023 BP regulation of Rho protein signal transduction 10/1105 137/16241  
 0.45642873 0.805887103 0.645725159  
 APOE/ARHGEF25/COL3A1/GPR174/HEG1/MYOC/P2RY10/PDGFRB/APOA1/APOC3 10  
 GO:0046546 BP development of primary male sexual characteristics 10/1105 137/16241  
 0.45642873 0.805887103 0.645725159  
 AR/DHH/FLNA/PDGFRB/SFRP1/SFRP2/UTF1/ZFPM2/HOXA11/REN 10  
 GO:0009408 BP response to heat 12/1105 166/16241 0.45716467 0.806896464  
 0.646533919  
 ARPP21/CAMK2A/CASQ1/CRYAB/CXCL12/HSPB8/IGF1/STAC/TGFB11/THBS1/ABCC2/P2RX3  
 12  
 GO:0002703 BP regulation of leukocyte mediated immunity 14/1105 195/16241  
 0.457463506 0.807133888 0.646724157  
 CCR2/CD1C/CLC/CLEC4G/CR1/CRTAM/FCER2/FCGR2B/IL12B/IL21/ITGB2/KLRC4-KLRK1/PTPR  
 C/C4BPB 14  
 GO:0006968 BP cellular defense response 4/1105 51/16241 0.460572615 0.811978438  
 0.650605902 CCR2/CXCL9/KIR3DL2/KLRC3 4  
 GO:0045143 BP homologous chromosome segregation 4/1105 51/16241 0.460572615  
 0.811978438 0.650605902 FMN2/MEIKIN/PTTG2/MCMDC2 4  
 GO:0019751 BP polyol metabolic process 9/1105 123/16241 0.460705193  
 0.811978438 0.650605902  
 ADCYAP1R1/FGF2/NUDT10/NUDT11/PLD4/CYP3A4/MOGAT2/MOGAT3/PCK1 9  
 GO:0048872 BP homeostasis of number of cells 17/1105 239/16241 0.460947673  
 0.812114408 0.650714849  
 AKT3/AXL/CCR2/CCR4/CCR7/CDH2/FLT3/GAPT/GPR174/IKZF1/JAM3/LMO1/TNFRSF13B/TRI  
 M58/EMX1/EPO/FOXN1 17  
 GO:0001953 BP negative regulation of cell-matrix adhesion 3/1105 37/16241 0.465421424  
 0.817942768 0.655384881 MYOC/SERPINE1/THBS1 3  
 GO:0009072 BP aromatic amino acid family metabolic process 3/1105 37/16241  
 0.465421424 0.817942768 0.655384881 IDO2/IYD/PAH 3  
 GO:0034122 BP negative regulation of toll-like receptor signaling pathway 3/1105  
 37/16241 0.465421424 0.817942768 0.655384881 LILRA4/PTPRS/TLR93  
 GO:0038083 BP peptidyl-tyrosine autophosphorylation 3/1105 37/16241 0.465421424  
 0.817942768 0.655384881 BLK/GREM1/SLA 3  
 GO:0042307 BP positive regulation of protein import into nucleus 3/1105 37/16241  
 0.465421424 0.817942768 0.655384881 FLNA/GLI3/CHP2 3  
 GO:0043029 BP T cell homeostasis 3/1105 37/16241 0.465421424 0.817942768  
 0.655384881 GPR174/LMO1/FOXN1 3  
 GO:0051590 BP positive regulation of neurotransmitter transport 3/1105 37/16241  
 0.465421424 0.817942768 0.655384881 CNR1/NLGN1/TACR2 3  
 GO:0007219 BP Notch signaling pathway 13/1105 182/16241 0.469457081 0.82059269  
 0.657508158  
 ANGPT4/CNTN1/FCER2/FGF10/HEYL/KCNA5/PLN/RIPPLY2/S1PR3/SUSD5/AGXT/ATOH1/BMP

GO:0061371 BP determination of heart left/right asymmetry 5/1105 66/162410.469526243  
 0.82059269 0.657508158 HAND2/FOLR1/FOXH1/IHH/NOTO 5  
 GO:0070373 BP negative regulation of ERK1 and ERK2 cascade 5/1105 66/16241  
 0.469526243 0.82059269 0.657508158 ADIPOQ/EMILIN1/FBLN1/PTPRC/TIMP3 5  
 GO:0002819 BP regulation of adaptive immune response 11/1105 153/16241  
 0.470066691 0.82059269 0.657508158  
 CCL19/CCR2/CD11C/CLC/CLEC4G/CR1/FCER2/FCGR2B/IL12B/PTPRC/C4BPB 11  
 GO:0002507 BP tolerance induction 2/1105 23/162410.470270444 0.82059269  
 0.657508158 CCR4/CLC2  
 GO:0003181 BP atrioventricular valve morphogenesis 2/1105 23/162410.470270444  
 0.82059269 0.657508158 HEYL/SLIT3 2  
 GO:0007026 BP negative regulation of microtubule depolymerization 2/1105 23/16241  
 0.470270444 0.82059269 0.657508158 NAV3/STMN2 2  
 GO:0007141 BP male meiosis I 2/1105 23/162410.470270444 0.82059269 0.657508158  
 CCNA1/SYCP3 2  
 GO:0009309 BP amine biosynthetic process 2/1105 23/162410.470270444 0.82059269  
 0.657508158 MOXD1/DDC 2  
 GO:0010640 BP regulation of platelet-derived growth factor receptor signaling pathway  
 2/1105 23/162410.470270444 0.82059269 0.657508158 ADIPOQ/MYOC 2  
 GO:0042430 BP indole-containing compound metabolic process 2/1105 23/16241  
 0.470270444 0.82059269 0.657508158 IDO2/DDC 2  
 GO:0045332 BP phospholipid translocation 2/1105 23/162410.470270444 0.82059269  
 0.657508158 ATP8B2/ATP10B 2  
 GO:0051349 BP positive regulation of lyase activity 2/1105 23/162410.470270444  
 0.82059269 0.657508158 TIMP2/GUCA2A 2  
 GO:0051446 BP positive regulation of meiotic cell cycle 2/1105 23/162410.470270444  
 0.82059269 0.657508158 DAZL/OVOL1 2  
 GO:0072170 BP metanephric tubule development 2/1105 23/162410.470270444  
 0.82059269 0.657508158 WNT9B/WWTR1 2  
 GO:0072243 BP metanephric nephron epithelium development 2/1105 23/16241  
 0.470270444 0.82059269 0.657508158 ADIPOQ/WWTR1 2  
 GO:0072337 BP modified amino acid transport 2/1105 23/162410.470270444  
 0.82059269 0.657508158 FOLR2/FOLR1 2  
 GO:0089718 BP amino acid import across plasma membrane 2/1105 23/16241  
 0.470270444 0.82059269 0.657508158 ATP1A2/RGS4 2  
 GO:1903429 BP regulation of cell maturation 2/1105 23/162410.470270444 0.82059269  
 0.657508158 NPPC/TRIM58 2  
 GO:2000178 BP negative regulation of neural precursor cell proliferation 2/1105  
 23/162410.470270444 0.82059269 0.657508158 LIMS2/NR2E1 2  
 GO:0002223 BP stimulatory C-type lectin receptor signaling pathway 8/1105 110/16241  
 0.475739422 0.829285186 0.664473108  
 CLEC10A/CLEC4C/CLEC6A/KLR4-KLRK1/MUC15/MUC17/MUC21/MUC4 8  
 GO:0002011 BP morphogenesis of an epithelial sheet 4/1105 52/162410.47575848  
 0.829285186 0.664473108 COL5A1/FLNA/TMEFF2/BMP7 4

GO:1990089 BP response to nerve growth factor 4/1105 52/162410.47575848  
0.829285186 0.664473108 NGF/NTRK2/STMN2/TAC1 4

GO:0006790 BP sulfur compound metabolic process 25/1105 358/16241 0.476257608  
0.82986072 0.66493426  
BGN/BHMT2/CDO1/CHST8/DCN/DSEL/GADL1/GGT5/GHR/KERA/LUM/OGN/OMD/PRELP/SP  
OCK3/VCAN/ABCC2/AGXT/CHST5/GGT6/GSTA1/GSTA2/GSTA3/SULT1C3/SULT2A1 25

GO:0019886 BP antigen processing and presentation of exogenous peptide antigen via MHC  
class II 7/1105 96/162410.481604642 0.837594723 0.671131208  
FCGR2B/HLA-DOA/HLA-DPA1/HLA-DPB1/HLA-DQA1/HLA-DQA2/HLA-DQB2 7

GO:0030516 BP regulation of axon extension 7/1105 96/162410.481604642 0.837594723  
0.671131208 APOE/CXCL12/FN1/MAG/PLXNA4/PTPRS/TNR 7

GO:0043473 BP pigmentation 7/1105 96/162410.481604642 0.837594723 0.671131208  
EN1/GLI3/SOX10/SPARC/ZEB2/IHH/SLC45A27

GO:0007281 BP germ cell development 17/1105 242/16241 0.481990873 0.837594723  
0.671131208  
DAZL/DHH/FMN2/IGF1/JAM3/NPPC/PDE3A/QKI/RIMBP3B/DEFB1/IHH/MCMDC2/SEMG1/SL  
C26A3/SYCP3/TDRD5/YBX2 17

GO:0003143 BP embryonic heart tube morphogenesis 5/1105 67/162410.482866033  
0.837594723 0.671131208 HAND2/FOLR1/FOXH1/IHH/NOTO 5

GO:0032272 BP negative regulation of protein polymerization 5/1105 67/16241  
0.482866033 0.837594723 0.671131208 ADD2/CLIP3/LMOD1/SLIT2/STMN2 5

GO:0042246 BP tissue regeneration 5/1105 67/162410.482866033 0.837594723  
0.671131208 FGF10/GAP43/IGF1/MUSTN1/APOA5 5

GO:0015804 BP neutral amino acid transport 3/1105 38/162410.483253959 0.837594723  
0.671131208 RGS4/SLC6A17/SLC6A7 3

GO:0045494 BP photoreceptor cell maintenance 3/1105 38/162410.483253959  
0.837594723 0.671131208 TUB/ADGRV1/USH1G 3

GO:0045616 BP regulation of keratinocyte differentiation 3/1105 38/162410.483253959  
0.837594723 0.671131208 REG3A/REG3G/SERPINB13 3

GO:0050856 BP regulation of T cell receptor signaling pathway 3/1105 38/16241  
0.483253959 0.837594723 0.671131208 CCR7/LILRB4/THY1 3

GO:0051180 BP vitamin transport 3/1105 38/162410.483253959 0.837594723  
0.671131208 FOLR2/APOA1/FOLR1 3

GO:0072529 BP pyrimidine-containing compound catabolic process 3/1105 38/16241  
0.483253959 0.837594723 0.671131208 DPYS/NT5C1A/APOBEC13

GO:1900744 BP regulation of p38MAPK cascade 3/1105 38/162410.483253959  
0.837594723 0.671131208 GDF6/HAND2/XDH 3

GO:2000826 BP regulation of heart morphogenesis 3/1105 38/162410.483253959  
0.837594723 0.671131208 DKK1/HAND2/BMP7 3

GO:0009101 BP glycoprotein biosynthetic process 23/1105 330/16241 0.483580181  
0.837744303 0.671251061  
BGN/CCL19/CCL21/CCR7/CHST8/DCN/DSEL/EXTL1/GFPT2/GXYLT2/IGF1/MGAT5B/ST6GAL2/  
ST6GALNAC5/ST8SIA2/ST8SIA6/TMTC1/VCAN/FUT3/MUC15/MUC17/MUC21/MUC4 23

GO:0051495 BP positive regulation of cytoskeleton organization 15/1105 213/16241

0.483681361 0.837744303 0.671251061  
 ACTN2/CCL21/CCR7/FLNA/FMN2/LMOD1/MAGEL2/MYOC/NAV3/SFRP1/STMN2/SYNPO2/TA  
 C1/TGFB3/APOA1 15  
 GO:0001738 BP morphogenesis of a polarized epithelium 10/1105 140/16241  
 0.484116608 0.837952538 0.671417911  
 DACT1/DKK1/PRICKLE1/PRICKLE2/ROR2/RSPO3/SFRP1/SFRP2/WNT9B/GRHL3 10  
 GO:0043112 BP receptor metabolic process 13/1105 184/16241 0.485527536  
 0.837952538 0.671417911  
 ADIPOQ/APOE/BVES/CACNG7/DKK1/GREM1/GRIA1/ITGB2/LRRTM1/RAB31/RSPO1/SFRP4/P  
 CSK9 13  
 GO:0006112 BP energy reserve metabolic process 6/1105 82/162410.488277825  
 0.837952538 0.671417911 ADRB3/GFPT2/IGF1/PYGM/SORBS1/G6PC 6  
 GO:0000768 BP syncytium formation by plasma membrane fusion 4/1105 53/16241  
 0.490778083 0.837952538 0.671417911 ADGRB3/CXCL9/EHD2/PLEKHO1 4  
 GO:0045981 BP positive regulation of nucleotide metabolic process 4/1105 53/16241  
 0.490778083 0.837952538 0.671417911 HTR2A/IGF1/GUCA2A/MLXIPL 4  
 GO:0046324 BP regulation of glucose import 4/1105 53/162410.490778083 0.837952538  
 0.671417911 ADIPOQ/IGF1/SORBS1/TERT 4  
 GO:0140253 BP cell-cell fusion 4/1105 53/162410.490778083 0.837952538 0.671417911  
 ADGRB3/CXCL9/EHD2/PLEKHO1 4  
 GO:1900544 BP positive regulation of purine nucleotide metabolic process 4/1105  
 53/162410.490778083 0.837952538 0.671417911 HTR2A/IGF1/GUCA2A/MLXIPL 4  
 GO:2000378 BP negative regulation of reactive oxygen species metabolic process 4/1105  
 53/162410.490778083 0.837952538 0.671417911 CRYAB/PTGIS/MMP3/SLC30A10 4  
 GO:0003272 BP endocardial cushion formation 2/1105 24/162410.492883029  
 0.837952538 0.671417911 HEYL/BMP7 2  
 GO:0007097 BP nuclear migration 2/1105 24/162410.492883029 0.837952538  
 0.671417911 TRIM58/ACTL8 2  
 GO:0021895 BP cerebral cortex neuron differentiation 2/1105 24/162410.492883029  
 0.837952538 0.671417911 EMX1/NR2E1 2  
 GO:0021904 BP dorsal/ventral neural tube patterning 2/1105 24/162410.492883029  
 0.837952538 0.671417911 GLI2/GLI3 2  
 GO:0032461 BP positive regulation of protein oligomerization 2/1105 24/16241  
 0.492883029 0.837952538 0.671417911 TCL1A/MMP3 2  
 GO:0033137 BP negative regulation of peptidyl-serine phosphorylation 2/1105  
 24/162410.492883029 0.837952538 0.671417911 DKK1/MLXIPL 2  
 GO:0034204 BP lipid translocation 2/1105 24/162410.492883029 0.837952538  
 0.671417911 ATP8B2/ATP10B 2  
 GO:0042832 BP defense response to protozoan 2/1105 24/162410.492883029  
 0.837952538 0.671417911 IL12B/DEFA1 2  
 GO:0044247 BP cellular polysaccharide catabolic process 2/1105 24/162410.492883029  
 0.837952538 0.671417911 PYGM/G6PC 2  
 GO:0046475 BP glycerophospholipid catabolic process 2/1105 24/162410.492883029  
 0.837952538 0.671417911 PLA2G4E/PLA2G4F 2

GO:0046639 BP negative regulation of alpha-beta T cell differentiation 2/1105 24/16241  
 0.492883029 0.837952538 0.671417911 GLI3/IHH 2  
 GO:0048799 BP animal organ maturation 2/1105 24/16241.0.492883029 0.837952538  
 0.671417911 GREM1/IGF1 2  
 GO:0051654 BP establishment of mitochondrion localization 2/1105 24/16241.0.492883029  
 0.837952538 0.671417911 NEFL/UCHL1 2  
 GO:0062009 BP secondary palate development 2/1105 24/16241.0.492883029  
 0.837952538 0.671417911 LRRC32/TGFB3 2  
 GO:0072677 BP eosinophil migration 2/1105 24/16241.0.492883029 0.837952538  
 0.671417911 CCL13/CCL15 2  
 GO:0086064 BP cell communication by electrical coupling involved in cardiac conduction  
 2/1105 24/16241.0.492883029 0.837952538 0.671417911 ATP1A2/SLC8A1 2  
 GO:2000482 BP regulation of interleukin-8 secretion 2/1105 24/16241.0.492883029  
 0.837952538 0.671417911 FCN1/SSC5D 2  
 GO:0036465 BP synaptic vesicle recycling 5/1105 68/16241.0.496087948 0.837952538  
 0.671417911 FGF14/NLGN1/SNAP91/SYT11/CEL 5  
 GO:0055008 BP cardiac muscle tissue morphogenesis 5/1105 68/16241.0.496087948  
 0.837952538 0.671417911 COL11A1/HEG1/MYL3/ZFPM2/FOXH1 5  
 GO:1903524 BP positive regulation of blood circulation 5/1105 68/16241.0.496087948  
 0.837952538 0.671417911 HTR2A/RGS4/FGA/FGB/FGG 5  
 GO:0071277 BP cellular response to calcium ion 6/1105 83/16241.0.500224585  
 0.837952538 0.671417911 NLGN1/SYT11/SYT4/SYT6/ADGRV1/CHP2 6  
 GO:0009395 BP phospholipid catabolic process 3/1105 39/16241.0.500796982  
 0.837952538 0.671417911 APOA2/PLA2G4E/PLA2G4F 3  
 GO:0021575 BP hindbrain morphogenesis 3/1105 39/16241.0.500796982 0.837952538  
 0.671417911 CBLN1/GLI2/LHX5 3  
 GO:1900015 BP regulation of cytokine production involved in inflammatory response 3/1105  
 39/16241.0.500796982 0.837952538 0.671417911 F2/IL17A/IL17F 3  
 GO:1904591 BP positive regulation of protein import 3/1105 39/16241.0.500796982  
 0.837952538 0.671417911 FLNA/GLI3/CHP2 3  
 GO:0062013 BP positive regulation of small molecule metabolic process 10/1105  
 142/16241 0.502399852 0.837952538 0.671417911  
 ADCYAP1R1/ADIPOQ/HTR2A/IGF1/SORBS1/APOA4/APOA5/FABP1/GUCA2A/MLXIPL10  
 GO:0106106 BP cold-induced thermogenesis 10/1105 142/16241 0.502399852  
 0.837952538 0.671417911  
 ADCYAP1/ADIPOQ/ADRB3/CCR2/CMKLR1/EBF2/FABP4/NPR3/LCN2/YBX2 10  
 GO:0120161 BP regulation of cold-induced thermogenesis 10/1105 142/16241  
 0.502399852 0.837952538 0.671417911  
 ADCYAP1/ADIPOQ/ADRB3/CCR2/CMKLR1/EBF2/FABP4/NPR3/LCN2/YBX2 10  
 GO:1902107 BP positive regulation of leukocyte differentiation 10/1105 142/16241  
 0.502399852 0.837952538 0.671417911  
 AXL/CCL19/GLI2/GLI3/IL12B/LILRB4/PTPRC/ROR2/IHH/IL17A 10  
 GO:0002495 BP antigen processing and presentation of peptide antigen via MHC class II  
 7/1105 98/16241.0.503641168 0.837952538 0.671417911

FCGR2B/HLA-DOA/HLA-DPA1/HLA-DPB1/HLA-DQA1/HLA-DQA2/HLA-DQB2 7

GO:0032091 BP negative regulation of protein binding 7/1105 98/162410.503641168  
0.837952538 0.671417911 ADIPOQ/CFHR1/CRTAC1/DACT1/DKK1/CARD18/PCSK9 7

GO:1904659 BP glucose transmembrane transport 7/1105 98/162410.503641168  
0.837952538 0.671417911 ADIPOQ/CLIP3/EDNRA/IGF1/PRKCB/SORBS1/TERT 7

GO:0006949 BP syncytium formation 4/1105 54/162410.505616036 0.837952538  
0.671417911 ADGRB3/CXCL9/EHD2/PLEKHO1 4

GO:0042306 BP regulation of protein import into nucleus 4/1105 54/162410.505616036  
0.837952538 0.671417911 AGTR2/FLNA/GLI3/CHP24

GO:0097120 BP receptor localization to synapse 4/1105 54/162410.505616036  
0.837952538 0.671417911 CACNG7/NETO1/NLGN1/RELN 4

GO:1903078 BP positive regulation of protein localization to plasma membrane 4/1105  
54/162410.505616036 0.837952538 0.671417911 CLIP3/EPHA3/SORBS1/STAC 4

GO:0001787 BP natural killer cell proliferation 1/1105 10/162410.505808077 0.837952538  
0.671417911 IL12B 1

GO:0002291 BP T cell activation via T cell receptor contact with antigen bound to MHC  
molecule on antigen presenting cell 1/1105 10/162410.505808077 0.837952538  
0.671417911 FGL2 1

GO:0003211 BP cardiac ventricle formation 1/1105 10/162410.505808077 0.837952538  
0.671417911 HAND2 1

GO:0003264 BP regulation of cardioblast proliferation 1/1105 10/162410.505808077  
0.837952538 0.671417911 HAND2 1

GO:0003376 BP sphingosine-1-phosphate receptor signaling pathway 1/1105 10/16241  
0.505808077 0.837952538 0.671417911 S1PR3 1

GO:0006558 BP L-phenylalanine metabolic process 1/1105 10/162410.505808077  
0.837952538 0.671417911 PAH 1

GO:0006559 BP L-phenylalanine catabolic process 1/1105 10/162410.505808077  
0.837952538 0.671417911 PAH 1

GO:0006930 BP substrate-dependent cell migration, cell extension 1/1105 10/16241  
0.505808077 0.837952538 0.671417911 P2RY12 1

GO:0006971 BP hypotonic response 1/1105 10/162410.505808077 0.837952538  
0.671417911 MYLK 1

GO:0007016 BP cytoskeletal anchoring at plasma membrane 1/1105 10/162410.505808077  
0.837952538 0.671417911 SHANK1 1

GO:0007028 BP cytoplasm organization 1/1105 10/162410.505808077 0.837952538  
0.671417911 TDRD5 1

GO:0007191 BP adenylate cyclase-activating dopamine receptor signaling pathway 1/1105  
10/162410.505808077 0.837952538 0.671417911 ADCY5 1

GO:0014049 BP positive regulation of glutamate secretion 1/1105 10/162410.505808077  
0.837952538 0.671417911 SYT41

GO:0014877 BP response to muscle inactivity involved in regulation of muscle adaptation  
1/1105 10/162410.505808077 0.837952538 0.671417911 CASQ1 1

GO:0014894 BP response to denervation involved in regulation of muscle adaptation 1/1105  
10/162410.505808077 0.837952538 0.671417911 CASQ1 1

GO:0021548 BP pons development 1/1105 10/162410.505808077 0.837952538  
0.671417911 PHOX2A 1

GO:0030388 BP fructose 1,6-bisphosphate metabolic process 1/1105 10/16241  
0.505808077 0.837952538 0.671417911 FBP2 1

GO:0030422 BP production of siRNA involved in RNA interference 1/1105 10/16241  
0.505808077 0.837952538 0.671417911 TERT1

GO:0030836 BP positive regulation of actin filament depolymerization 1/1105 10/16241  
0.505808077 0.837952538 0.671417911 ACTN2 1

GO:0031284 BP positive regulation of guanylate cyclase activity 1/1105 10/16241  
0.505808077 0.837952538 0.671417911 GUCA2A 1

GO:0032000 BP positive regulation of fatty acid beta-oxidation 1/1105 10/16241  
0.505808077 0.837952538 0.671417911 FABP1 1

GO:0032025 BP response to cobalt ion 1/1105 10/162410.505808077 0.837952538  
0.671417911 SERPINF1 1

GO:0032328 BP alanine transport 1/1105 10/162410.505808077 0.837952538  
0.671417911 SLC6A17 1

GO:0032463 BP negative regulation of protein homooligomerization 1/1105 10/16241  
0.505808077 0.837952538 0.671417911 CRYAB 1

GO:0032525 BP somite rostral/caudal axis specification 1/1105 10/162410.505808077  
0.837952538 0.671417911 RIPPLY2 1

GO:0032621 BP interleukin-18 production 1/1105 10/162410.505808077 0.837952538  
0.671417911 TLR91

GO:0033148 BP positive regulation of intracellular estrogen receptor signaling pathway  
1/1105 10/162410.505808077 0.837952538 0.671417911 AR 1

GO:0033860 BP regulation of NAD(P)H oxidase activity 1/1105 10/162410.505808077  
0.837952538 0.671417911 AGTR1 1

GO:0034350 BP regulation of glial cell apoptotic process 1/1105 10/162410.505808077  
0.837952538 0.671417911 AKAP12 1

GO:0035092 BP sperm chromatin condensation 1/1105 10/162410.505808077  
0.837952538 0.671417911 SYCP3 1

GO:0035457 BP cellular response to interferon-alpha 1/1105 10/162410.505808077  
0.837952538 0.671417911 AXL 1

GO:0035672 BP oligopeptide transmembrane transport 1/1105 10/162410.505808077  
0.837952538 0.671417911 CDH17 1

GO:0035933 BP glucocorticoid secretion 1/1105 10/162410.505808077 0.837952538  
0.671417911 TAC1 1

GO:0042048 BP olfactory behavior 1/1105 10/162410.505808077 0.837952538  
0.671417911 SHANK1 1

GO:0042428 BP serotonin metabolic process 1/1105 10/162410.505808077 0.837952538  
0.671417911 DDC 1

GO:0045217 BP cell-cell junction maintenance 1/1105 10/162410.505808077  
0.837952538 0.671417911 CSF1R 1

GO:0045625 BP regulation of T-helper 1 cell differentiation 1/1105 10/162410.505808077  
0.837952538 0.671417911 CCL19 1

GO:0045713 BP low-density lipoprotein particle receptor biosynthetic process 1/1105  
10/162410.505808077 0.837952538 0.671417911 ADIPOQ 1

GO:0045760 BP positive regulation of action potential 1/1105 10/162410.505808077  
0.837952538 0.671417911 TAC1 1

GO:0045945 BP positive regulation of transcription by RNA polymerase III 1/1105  
10/162410.505808077 0.837952538 0.671417911 AR 1

GO:0046689 BP response to mercury ion 1/1105 10/162410.505808077 0.837952538  
0.671417911 ABCC2 1

GO:0048021 BP regulation of melanin biosynthetic process 1/1105 10/162410.505808077  
0.837952538 0.671417911 ZEB2 1

GO:0048304 BP positive regulation of isotype switching to IgG isotypes 1/1105  
10/162410.505808077 0.837952538 0.671417911 PTPRC 1

GO:0048755 BP branching morphogenesis of a nerve 1/1105 10/162410.505808077  
0.837952538 0.671417911 EPHA7 1

GO:0051133 BP regulation of NK T cell activation 1/1105 10/162410.505808077  
0.837952538 0.671417911 IL12B 1

GO:0051255 BP spindle midzone assembly 1/1105 10/162410.505808077 0.837952538  
0.671417911 CCDC69 1

GO:0051574 BP positive regulation of histone H3-K9 methylation 1/1105 10/16241  
0.505808077 0.837952538 0.671417911 PRDM12 1

GO:0051583 BP dopamine uptake involved in synaptic transmission 1/1105 10/16241  
0.505808077 0.837952538 0.671417911 SLC6A2 1

GO:0051934 BP catecholamine uptake involved in synaptic transmission 1/1105  
10/162410.505808077 0.837952538 0.671417911 SLC6A2 1

GO:0060033 BP anatomical structure regression 1/1105 10/162410.505808077  
0.837952538 0.671417911 GLI2 1

GO:0060068 BP vagina development 1/1105 10/162410.505808077 0.837952538  
0.671417911 AXL 1

GO:0060456 BP positive regulation of digestive system process 1/1105 10/16241  
0.505808077 0.837952538 0.671417911 TAC1 1

GO:0061140 BP lung secretory cell differentiation 1/1105 10/162410.505808077  
0.837952538 0.671417911 FGF10 1

GO:0061299 BP retina vasculature morphogenesis in camera-type eye 1/1105 10/16241  
0.505808077 0.837952538 0.671417911 CYP1B1 1

GO:0070091 BP glucagon secretion 1/1105 10/162410.505808077 0.837952538  
0.671417911 CARTPT 1

GO:0070278 BP extracellular matrix constituent secretion 1/1105 10/162410.505808077  
0.837952538 0.671417911 ADTRP 1

GO:0070341 BP fat cell proliferation 1/1105 10/162410.505808077 0.837952538  
0.671417911 FGF10 1

GO:0070344 BP regulation of fat cell proliferation 1/1105 10/162410.505808077  
0.837952538 0.671417911 FGF10 1

GO:0070601 BP centromeric sister chromatid cohesion 1/1105 10/162410.505808077  
0.837952538 0.671417911 MEIKIN 1

GO:0071281 BP cellular response to iron ion 1/1105 10/162410.505808077 0.837952538  
0.671417911 TFR21

GO:0071600 BP otic vesicle morphogenesis 1/1105 10/162410.505808077 0.837952538  
0.671417911 FGF10 1

GO:0071609 BP chemokine (C-C motif) ligand 5 production 1/1105 10/162410.505808077  
0.837952538 0.671417911 ADCYAP1 1

GO:0072015 BP glomerular visceral epithelial cell development 1/1105 10/16241  
0.505808077 0.837952538 0.671417911 ADIPOQ 1

GO:0086016 BP AV node cell action potential 1/1105 10/162410.505808077 0.837952538  
0.671417911 CACNA1G1

GO:0086027 BP AV node cell to bundle of His cell signaling 1/1105 10/162410.505808077  
0.837952538 0.671417911 CACNA1G1

GO:0086103 BP G protein-coupled receptor signaling pathway involved in heart process  
1/1105 10/162410.505808077 0.837952538 0.671417911 PLN 1

GO:0090037 BP positive regulation of protein kinase C signaling 1/1105 10/16241  
0.505808077 0.837952538 0.671417911 ADGRV1 1

GO:0090394 BP negative regulation of excitatory postsynaptic potential 1/1105  
10/162410.505808077 0.837952538 0.671417911 CBLN1 1

GO:0097050 BP type B pancreatic cell apoptotic process 1/1105 10/162410.505808077  
0.837952538 0.671417911 NEUROD1 1

GO:0097499 BP protein localization to non-motile cilium 1/1105 10/162410.505808077  
0.837952538 0.671417911 TUB 1

GO:0106049 BP regulation of cellular response to osmotic stress 1/1105 10/16241  
0.505808077 0.837952538 0.671417911 EPO 1

GO:0110096 BP cellular response to aldehyde 1/1105 10/162410.505808077 0.837952538  
0.671417911 AKR1B10 1

GO:0140052 BP cellular response to oxidised low-density lipoprotein particle stimulus  
1/1105 10/162410.505808077 0.837952538 0.671417911 ADTRP 1

GO:1902221 BP erythrose 4-phosphate/phosphoenolpyruvate family amino acid metabolic  
process 1/1105 10/162410.505808077 0.837952538 0.671417911 PAH 1

GO:1902222 BP erythrose 4-phosphate/phosphoenolpyruvate family amino acid catabolic  
process 1/1105 10/162410.505808077 0.837952538 0.671417911 PAH 1

GO:1902237 BP positive regulation of endoplasmic reticulum stress-induced intrinsic  
apoptotic signaling pathway 1/1105 10/162410.505808077 0.837952538 0.671417911  
RNF183 1

GO:1902260 BP negative regulation of delayed rectifier potassium channel activity 1/1105  
10/162410.505808077 0.837952538 0.671417911 KCNE4 1

GO:1903299 BP regulation of hexokinase activity 1/1105 10/162410.505808077  
0.837952538 0.671417911 FOXA2 1

GO:1905522 BP negative regulation of macrophage migration 1/1105 10/16241  
0.505808077 0.837952538 0.671417911 EMILIN1 1

GO:1990416 BP cellular response to brain-derived neurotrophic factor stimulus 1/1105  
10/162410.505808077 0.837952538 0.671417911 NTRK2 1

GO:1990535 BP neuron projection maintenance 1/1105 10/162410.505808077

0.837952538 0.671417911 MAP1A 1  
 GO:2000252 BP negative regulation of feeding behavior 1/1105 10/162410.505808077  
 0.837952538 0.671417911 RETN 1  
 GO:2000318 BP positive regulation of T-helper 17 type immune response 1/1105  
 10/162410.505808077 0.837952538 0.671417911 IL12B 1  
 GO:2000849 BP regulation of glucocorticoid secretion 1/1105 10/162410.505808077  
 0.837952538 0.671417911 TAC1 1  
 GO:0050796 BP regulation of insulin secretion 12/1105 172/16241 0.507293949  
 0.840130774 0.673163244  
 ADCY5/BLK/CARTPT/CNR1/EPHA5/KCNA5/KCNB1/SFRP1/FOXA2/NEUROD1/NPFF/RFX6 12  
 GO:0051056 BP regulation of small GTPase mediated signal transduction 23/1105  
 334/16241 0.507515466 0.840214347 0.673230208  
 A2M/ADCYAP1R1/APOE/ARHGAP20/ARHGAP31/ARHGEF25/COL3A1/FGF10/GPR174/HEG1/IGF1/MYOC/NGF/P2RY10/PDGFRB/PSD/RELN/SLIT2/TIMP2/APOA1/APOC3/EPO/RHOV 23  
 GO:0045685 BP regulation of glial cell differentiation 5/1105 69/162410.509180744  
 0.842687268 0.675211661 MAG/TENM4/F2/NKX6-2/NR2E1 5  
 GO:0030073 BP insulin secretion 14/1105 202/16241 0.5114471 0.844427586  
 0.676606108  
 ADCY5/ADCYAP1/BLK/CARTPT/CNR1/EPHA5/KCNA5/KCNB1/PTPRN/SFRP1/FOXA2/NEUROD1/NPFF/RFX6 14  
 GO:0048515 BP spermatid differentiation 10/1105 143/16241 0.511475857  
 0.844427586 0.676606108  
 DHH/JAM3/QKI/RIMBP3B/TMEM119/DEFB1/SEMG1/SLC26A3/SYCP3/TDRD5 10  
 GO:0006767 BP water-soluble vitamin metabolic process 6/1105 84/162410.512072507  
 0.844427586 0.676606108 AOX1/FOLR2/FOLR1/PRSS1/PRSS3/VNN3 6  
 GO:0034637 BP cellular carbohydrate biosynthetic process 6/1105 84/162410.512072507  
 0.844427586 0.676606108 EXTL1/HAS1/IGF1/SORBS1/FBP2/PCK1 6  
 GO:0043502 BP regulation of muscle adaptation 6/1105 84/162410.512072507  
 0.844427586 0.676606108 CASQ1/HAND2/IGF1/IGFBP5/PI16/RGS4 6  
 GO:0001894 BP tissue homeostasis 15/1105 217/16241 0.513320123 0.844427586  
 0.676606108  
 AKT3/CARTPT/CCR2/CSF1R/KRT1/SERPINA3/TLR9/TMEM119/TUB/WWTR1/ADGRV1/IHH/MUC4/NEUROD1/USH1G 15  
 GO:0002708 BP positive regulation of lymphocyte mediated immunity 7/1105 99/16241  
 0.514543694 0.844427586 0.676606108  
 CD1C/CRTAM/FCER2/IL12B/IL21/KLRK4-KLRK1/PTPRC 7  
 GO:0043500 BP muscle adaptation 7/1105 99/162410.514543694 0.844427586  
 0.676606108 HAND2/IGF1/IGFBP5/MYOC/MYOZ2/PI16/RGS4 7  
 GO:0001562 BP response to protozoan 2/1105 25/162410.514873904 0.844427586  
 0.676606108 IL12B/DEFA1 2  
 GO:0001835 BP blastocyst hatching 2/1105 25/162410.514873904 0.844427586  
 0.676606108 CMTM3/ST8SIA6 2  
 GO:0002335 BP mature B cell differentiation 2/1105 25/162410.514873904 0.844427586  
 0.676606108 FCGR2B/CDH17 2

GO:0003171 BP atrioventricular valve development 2/1105 25/162410.514873904  
0.844427586 0.676606108 HEYL/SLIT3 2

GO:0030325 BP adrenal gland development 2/1105 25/162410.514873904 0.844427586  
0.676606108 APOA1/SALL1 2

GO:0031954 BP positive regulation of protein autophosphorylation 2/1105 25/16241  
0.514873904 0.844427586 0.676606108 GPNMB/GREM1 2

GO:0035188 BP hatching 2/1105 25/162410.514873904 0.844427586 0.676606108  
CMTM3/ST8SIA6 2

GO:0035886 BP vascular smooth muscle cell differentiation 2/1105 25/162410.514873904  
0.844427586 0.676606108 COMP/MYOCD 2

GO:0042481 BP regulation of odontogenesis 2/1105 25/162410.514873904 0.844427586  
0.676606108 ASPN/RSPO2 2

GO:0044788 BP modulation by host of viral process 2/1105 25/162410.514873904  
0.844427586 0.676606108 APOE/CSF1R 2

GO:0045662 BP negative regulation of myoblast differentiation 2/1105 25/16241  
0.514873904 0.844427586 0.676606108 CMTM5/PRICKLE1 2

GO:0045672 BP positive regulation of osteoclast differentiation 2/1105 25/16241  
0.514873904 0.844427586 0.676606108 IL12B/IL17A 2

GO:0060669 BP embryonic placenta morphogenesis 2/1105 25/162410.514873904  
0.844427586 0.676606108 RSPO3/BMP7 2

GO:0060969 BP negative regulation of gene silencing 2/1105 25/162410.514873904  
0.844427586 0.676606108 APOBEC1/TERT 2

GO:0061217 BP regulation of mesonephros development 2/1105 25/162410.514873904  
0.844427586 0.676606108 AGTR2/SIX2 2

GO:0071684 BP organism emergence from protective structure 2/1105 25/16241  
0.514873904 0.844427586 0.676606108 CMTM3/ST8SIA6 2

GO:0095500 BP acetylcholine receptor signaling pathway 2/1105 25/162410.514873904  
0.844427586 0.676606108 CHRM2/CHRNA3 2

GO:1903831 BP signal transduction involved in cellular response to ammonium ion 2/1105  
25/162410.514873904 0.844427586 0.676606108 CHRM2/CHRNA3 2

GO:2001024 BP negative regulation of response to drug 2/1105 25/162410.514873904  
0.844427586 0.676606108 CNR1/RGS4 2

GO:0071248 BP cellular response to metal ion 13/1105 188/16241 0.517357669  
0.846495724 0.678263225  
CYBB/FABP4/KCNA1/KCNK3/NLGN1/SERPINF1/SYT11/SYT4/SYT6/ADGRV1/CHP2/SLC30A10/  
TFR213

GO:0001580 BP detection of chemical stimulus involved in sensory perception of bitter taste  
3/1105 40/162410.518030568 0.846495724 0.678263225 CST2/RTP5/TAS2R38 3

GO:0002369 BP T cell cytokine production 3/1105 40/162410.518030568 0.846495724  
0.678263225 CCR2/CLC/IL12B 3

GO:0006654 BP phosphatidic acid biosynthetic process 3/1105 40/162410.518030568  
0.846495724 0.678263225 PLA2G2D/ALPI/PLA2G2F3

GO:0021532 BP neural tube patterning 3/1105 40/162410.518030568 0.846495724  
0.678263225 EN1/GLI2/GLI3 3

GO:0045124 BP regulation of bone resorption 3/1105 40/162410.518030568 0.846495724  
0.678263225 CARTPT/CSF1R/TMEM119 3

GO:0050873 BP brown fat cell differentiation 3/1105 40/162410.518030568 0.846495724  
0.678263225 ADIPOQ/EBF2/FABP4 3

GO:0051602 BP response to electrical stimulus 3/1105 40/162410.518030568  
0.846495724 0.678263225 AKAP12/TACR2/EPO 3

GO:0090184 BP positive regulation of kidney development 3/1105 40/162410.518030568  
0.846495724 0.678263225 ADIPOQ/AGTR2/PDGFRB 3

GO:2000772 BP regulation of cellular senescence 3/1105 40/162410.518030568  
0.846495724 0.678263225 AKT3/SLC30A10/TERT 3

GO:2001258 BP negative regulation of cation channel activity 3/1105 40/16241  
0.518030568 0.846495724 0.678263225 CASQ2/KCNE4/EPO 3

GO:0030183 BP B cell differentiation 9/1105 129/16241 0.51869567 0.847018993  
0.678682499 CR2/FCGR2B/FLT3/MS4A1/PTPRC/SFRP1/TLR9/VCAM1/CDH17 9

GO:0071901 BP negative regulation of protein serine/threonine kinase activity 9/1105  
129/16241 0.51869567 0.847018993 0.678682499  
ADIPOQ/APOE/HEG1/MYOC/D/SGS4/SFRP1/SFRP2/UCHL1/BMP7 9

GO:0030520 BP intracellular estrogen receptor signaling pathway 4/1105 55/16241  
0.520258202 0.847036225 0.678696306 AR/CYP7B1/DEFA1/FOXH1 4

GO:0032515 BP negative regulation of phosphoprotein phosphatase activity 4/1105  
55/162410.520258202 0.847036225 0.678696306  
PPP1R14C/PPP1R14D/PPP1R1B/PPP1R27 4

GO:0032732 BP positive regulation of interleukin-1 production 4/1105 55/16241  
0.520258202 0.847036225 0.678696306 CCL19/TLR8/ORM1/ORM2 4

GO:0045824 BP negative regulation of innate immune response 4/1105 55/16241  
0.520258202 0.847036225 0.678696306 A2M/CR1/SERPING1/VSIG4 4

GO:0048488 BP synaptic vesicle endocytosis 4/1105 55/162410.520258202 0.847036225  
0.678696306 NLGN1/SNAP91/SYT11/CEL 4

GO:0051145 BP smooth muscle cell differentiation 4/1105 55/162410.520258202  
0.847036225 0.678696306 COMP/FGF10/MYOC/D/RBPM2 4

GO:0061178 BP regulation of insulin secretion involved in cellular response to glucose  
stimulus 4/1105 55/162410.520258202 0.847036225 0.678696306  
ADCY5/EPHA5/FOXA2/RFX6 4

GO:0140238 BP presynaptic endocytosis 4/1105 55/162410.520258202 0.847036225  
0.678696306 NLGN1/SNAP91/SYT11/CEL 4

GO:2000272 BP negative regulation of signaling receptor activity 4/1105 55/16241  
0.520258202 0.847036225 0.678696306 AGTR2/DKK1/ADH7/PCSK9 4

GO:1902652 BP secondary alcohol metabolic process 10/1105 144/16241 0.520502621  
0.847153372 0.678790172  
APOE/CYP7B1/FGFR1/APOA1/APOA2/APOA4/APOA5/CEL/CYP3A4/PCSK9 10

GO:1901653 BP cellular response to peptide 25/1105 366/16241 0.522111285  
0.848475989 0.679849932  
ACTN2/ADCY2/ADCY5/ADIPOQ/AGTR1/AGTR2/CAMK2A/CPEB1/FBN1/FCGR2B/GHR/GLP2R/  
IGF1/NGFR/PRKCB/RAB31/SORBS1/VCAM1/VIM/APOBEC1/ATP6V1C2/PCK1/PCSK9/REG1A/SLC3

0A10 25

GO:0009064 BP glutamine family amino acid metabolic process 5/1105 70/16241  
0.52213389 0.848475989 0.679849932 ART4/ATCAY/GFPT2/GLYATL1/OTC 5

GO:0106027 BP neuron projection organization 6/1105 85/162410.523813396  
0.848475989 0.679849932 APOE/FCGR2B/MAP1A/NLGN1/RELN/SHANK1 6

GO:0009100 BP glycoprotein metabolic process 27/1105 396/16241 0.524644065  
0.848475989 0.679849932  
BGN/CCL19/CCL21/CCR7/CHST8/COL11A1/DCN/DSEL/EXTL1/GFPT2/GXYLT2/IGF1/MGAT5B/  
SPOCK3/ST6GAL2/ST6GALNAC5/ST8SIA2/ST8SIA6/SULF1/TMTC1/VCAN/FUT3/IHH/MUC15/MUC  
17/MUC21/MUC4 27

GO:0007569 BP cell aging 7/1105 100/16241 0.525360159 0.848475989 0.679849932  
AKT3/PRELP/SERPINE1/MAGEA2/MAGEA2B/SLC30A10/TERT 7

GO:0030260 BP entry into host cell 9/1105 130/16241 0.528174715 0.848475989  
0.679849932 AXL/CLEC4G/CR1/CR2/FCN1/HTR2A/MRC1/NCAM1/CLDN9 9

GO:0044409 BP entry into host9/1105 130/16241 0.528174715 0.848475989  
0.679849932 AXL/CLEC4G/CR1/CR2/FCN1/HTR2A/MRC1/NCAM1/CLDN9 9

GO:0051806 BP entry into cell of other organism involved in symbiotic interaction 9/1105  
130/16241 0.528174715 0.848475989 0.679849932  
AXL/CLEC4G/CR1/CR2/FCN1/HTR2A/MRC1/NCAM1/CLDN9 9

GO:0051828 BP entry into other organism involved in symbiotic interaction 9/1105  
130/16241 0.528174715 0.848475989 0.679849932  
AXL/CLEC4G/CR1/CR2/FCN1/HTR2A/MRC1/NCAM1/CLDN9 9

GO:0008360 BP regulation of cell shape 10/1105 145/16241 0.529476187 0.848475989  
0.679849932 BVES/CCL13/CSF1R/FERMT2/FN1/ITGB2/PLEKHO1/PLXNA4/F2/RHOV 10

GO:0007623 BP circadian rhythm 14/1105 205/16241 0.53418658 0.848475989  
0.679849932  
ADIPOQ/CARTPT/HTR7/KCNA2/MAGEL2/NGFR/NLGN1/NTRK2/PTGDS/RORB/SERPINE1/CRX  
/DDC/SIX3 14

GO:0010611 BP regulation of cardiac muscle hypertrophy 4/1105 56/162410.534691662  
0.848475989 0.679849932 HAND2/IGF1/PI16/RGS44

GO:0006509 BP membrane protein ectodomain proteolysis 3/1105 41/162410.53493725  
0.848475989 0.679849932 APOE/TIMP2/TIMP3 3

GO:0030890 BP positive regulation of B cell proliferation 3/1105 41/162410.53493725  
0.848475989 0.679849932 IL21/PTPRC/TLR9 3

GO:0032456 BP endocytic recycling 3/1105 41/162410.53493725 0.848475989  
0.679849932 ACTN2/BVES/EHD2 3

GO:0032924 BP activin receptor signaling pathway 3/1105 41/162410.53493725  
0.848475989 0.679849932 FGF10/GDF6/FOXH1 3

GO:0046473 BP phosphatidic acid metabolic process 3/1105 41/162410.53493725  
0.848475989 0.679849932 PLA2G2D/ALPI/PLA2G2F3

GO:1901658 BP glycosyl compound catabolic process 3/1105 41/162410.53493725  
0.848475989 0.679849932 DPYS/NT5C1A/APOBEC13

GO:1902893 BP regulation of pri-miRNA transcription by RNA polymerase II3/1105  
41/162410.53493725 0.848475989 0.679849932 LILRB4/NGFR/TERT 3

GO:0043647 BP inositol phosphate metabolic process 5/1105 71/162410.534937563  
0.848475989 0.679849932 ADCYAP1R1/FGF2/NUDT10/NUDT11/PLD4 5

GO:0061180 BP mammary gland epithelium development 5/1105 71/162410.534937563  
0.848475989 0.679849932 AR/CSF1R/FGF10/GLI2/ATP2C2 5

GO:0048013 BP ephrin receptor signaling pathway 6/1105 86/162410.535439507  
0.848475989 0.679849932 EPHA3/EPHA5/EPHA6/EPHA7/MMP2/EFNA2 6

GO:0110020 BP regulation of actomyosin structure organization 6/1105 86/16241  
0.535439507 0.848475989 0.679849932 MYOC/SFRP1/TAC1/TGFB3/TMEFF2/APOA1 6

GO:0031532 BP actin cytoskeleton reorganization 7/1105 101/16241 0.536084275  
0.848475989 0.679849932 ANTXR1/CSF1R/FGF10/FGF7/FLNA/NRK/THSD7B 7

GO:0000272 BP polysaccharide catabolic process 2/1105 26/162410.536222938  
0.848475989 0.679849932 PYGM/G6PC 2

GO:0001702 BP gastrulation with mouth forming second 2/1105 26/162410.536222938  
0.848475989 0.679849932 TENM4/FOXA2 2

GO:0001964 BP startle response 2/1105 26/162410.536222938 0.848475989  
0.679849932 KCNA1/PENK 2

GO:0002360 BP T cell lineage commitment 2/1105 26/162410.536222938 0.848475989  
0.679849932 IL12B/FOXN1 2

GO:0006760 BP folic acid-containing compound metabolic process 2/1105 26/16241  
0.536222938 0.848475989 0.679849932 FOLR2/FOLR1 2

GO:0006884 BP cell volume homeostasis 2/1105 26/162410.536222938 0.848475989  
0.679849932 KCNMA1/SLC12A3 2

GO:0009074 BP aromatic amino acid family catabolic process 2/1105 26/16241  
0.536222938 0.848475989 0.679849932 IDO2/PAH 2

GO:0010586 BP miRNA metabolic process 2/1105 26/162410.536222938 0.848475989  
0.679849932 LIN28B/TRIM71 2

GO:0010614 BP negative regulation of cardiac muscle hypertrophy 2/1105 26/16241  
0.536222938 0.848475989 0.679849932 PI16/RGS4 2

GO:0022011 BP myelination in peripheral nervous system 2/1105 26/162410.536222938  
0.848475989 0.679849932 MYOC/NTRK2 2

GO:0032292 BP peripheral nervous system axon ensheathment 2/1105 26/16241  
0.536222938 0.848475989 0.679849932 MYOC/NTRK2 2

GO:0043090 BP amino acid import 2/1105 26/162410.536222938 0.848475989  
0.679849932 ATP1A2/RGS4 2

GO:0051125 BP regulation of actin nucleation 2/1105 26/162410.536222938 0.848475989  
0.679849932 FMN2/MAGEL2 2

GO:0060037 BP pharyngeal system development 2/1105 26/162410.536222938  
0.848475989 0.679849932 BMP7/FOLR1 2

GO:0060122 BP inner ear receptor cell stereocilium organization 2/1105 26/16241  
0.536222938 0.848475989 0.679849932 ADGRV1/USH1G 2

GO:0060143 BP positive regulation of syncytium formation by plasma membrane fusion  
2/1105 26/162410.536222938 0.848475989 0.679849932 CXCL9/EHD2 2

GO:0071514 BP genetic imprinting 2/1105 26/162410.536222938 0.848475989  
0.679849932 NDN/CTCF 2

GO:0071711 BP basement membrane organization 2/1105 26/162410.536222938  
0.848475989 0.679849932 CMA1/FLRT2 2

GO:0071880 BP adenylate cyclase-activating adrenergic receptor signaling pathway 2/1105  
26/162410.536222938 0.848475989 0.679849932 ADRB3/PLN 2

GO:0098810 BP neurotransmitter reuptake 2/1105 26/162410.536222938 0.848475989  
0.679849932 ATP1A2/SLC6A2 2

GO:0046578 BP regulation of Ras protein signal transduction 16/1105 235/16241  
0.536317038 0.848475989 0.679849932  
APOE/ARHGEF25/COL3A1/FGF10/GPR174/HEG1/IGF1/MYOC/NGF/P2RY10/PDGFRB/PSD/TI  
MP2/APOA1/APOC3/EPO 16

GO:0000050 BP urea cycle 1/1105 11/162410.539452466 0.848475989 0.679849932  
OTC 1

GO:0001821 BP histamine secretion 1/1105 11/162410.539452466 0.848475989  
0.679849932 ADCYAP1 1

GO:0002328 BP pro-B cell differentiation 1/1105 11/162410.539452466 0.848475989  
0.679849932 FLT3 1

GO:0002517 BP T cell tolerance induction 1/1105 11/162410.539452466 0.848475989  
0.679849932 CLC 1

GO:0002679 BP respiratory burst involved in defense response 1/1105 11/16241  
0.539452466 0.848475989 0.679849932 MPO 1

GO:0003306 BP Wnt signaling pathway involved in heart development 1/1105 11/16241  
0.539452466 0.848475989 0.679849932 DKK1 1

GO:0003356 BP regulation of cilium beat frequency 1/1105 11/162410.539452466  
0.848475989 0.679849932 ARMC4 1

GO:0005984 BP disaccharide metabolic process 1/1105 11/162410.539452466  
0.848475989 0.679849932 FBP2 1

GO:0006048 BP UDP-N-acetylglucosamine biosynthetic process 1/1105 11/16241  
0.539452466 0.848475989 0.679849932 GFPT2 1

GO:0006568 BP tryptophan metabolic process 1/1105 11/162410.539452466  
0.848475989 0.679849932 IDO2 1

GO:0006702 BP androgen biosynthetic process 1/1105 11/162410.539452466  
0.848475989 0.679849932 HSD3B1 1

GO:0006857 BP oligopeptide transport 1/1105 11/162410.539452466 0.848475989  
0.679849932 CDH17 1

GO:0007256 BP activation of JNK activity 1/1105 11/162410.539452466 0.848475989  
0.679849932 NRK 1

GO:0009629 BP response to gravity 1/1105 11/162410.539452466 0.848475989  
0.679849932 SPARC 1

GO:0009950 BP dorsal/ventral axis specification 1/1105 11/162410.539452466  
0.848475989 0.679849932 SFRP1 1

GO:0014745 BP negative regulation of muscle adaptation 1/1105 11/162410.539452466  
0.848475989 0.679849932 IGFBP5 1

GO:0014870 BP response to muscle inactivity 1/1105 11/162410.539452466 0.848475989  
0.679849932 CASQ1 1

GO:0015014 BP heparan sulfate proteoglycan biosynthetic process, polysaccharide chain biosynthetic process 1/1105 11/162410.539452466 0.848475989 0.679849932 EXTL1 1

GO:0019336 BP phenol-containing compound catabolic process 1/1105 11/16241 0.539452466 0.848475989 0.679849932 MOXD1 1

GO:0030241 BP skeletal muscle myosin thick filament assembly 1/1105 11/16241 0.539452466 0.848475989 0.679849932 MYH11 1

GO:0030948 BP negative regulation of vascular endothelial growth factor receptor signaling pathway 1/1105 11/162410.539452466 0.848475989 0.679849932 EMILIN1 1

GO:0031442 BP positive regulation of mRNA 3'-end processing 1/1105 11/16241 0.539452466 0.848475989 0.679849932 CPEB1 1

GO:0032060 BP bleb assembly 1/1105 11/162410.539452466 0.848475989 0.679849932 MYLK 1

GO:0032490 BP detection of molecule of bacterial origin 1/1105 11/162410.539452466 0.848475989 0.679849932 SSC5D 1

GO:0032769 BP negative regulation of monooxygenase activity 1/1105 11/16241 0.539452466 0.848475989 0.679849932 CNR1 1

GO:0033632 BP regulation of cell-cell adhesion mediated by integrin 1/1105 11/16241 0.539452466 0.848475989 0.679849932 CXCL13 1

GO:0035747 BP natural killer cell chemotaxis 1/1105 11/162410.539452466 0.848475989 0.679849932 KLRC4-KLRK1 1

GO:0045793 BP positive regulation of cell size 1/1105 11/162410.539452466 0.848475989 0.679849932 AKT3 1

GO:0046007 BP negative regulation of activated T cell proliferation 1/1105 11/16241 0.539452466 0.848475989 0.679849932 LRRC32 1

GO:0048548 BP regulation of pinocytosis 1/1105 11/162410.539452466 0.848475989 0.679849932 AXL 1

GO:0048672 BP positive regulation of collateral sprouting 1/1105 11/162410.539452466 0.848475989 0.679849932 NGF 1

GO:0055091 BP phospholipid homeostasis 1/1105 11/162410.539452466 0.848475989 0.679849932 APOA1 1

GO:0060174 BP limb bud formation 1/1105 11/162410.539452466 0.848475989 0.679849932 FGF10 1

GO:0060315 BP negative regulation of ryanodine-sensitive calcium-release channel activity 1/1105 11/162410.539452466 0.848475989 0.679849932 CASQ2 1

GO:0060439 BP trachea morphogenesis 1/1105 11/162410.539452466 0.848475989 0.679849932 RSPO2 1

GO:0060576 BP intestinal epithelial cell development 1/1105 11/162410.539452466 0.848475989 0.679849932 NKX3-2 1

GO:0060736 BP prostate gland growth 1/1105 11/162410.539452466 0.848475989 0.679849932 AR 1

GO:0060856 BP establishment of blood-brain barrier 1/1105 11/162410.539452466 0.848475989 0.679849932 ADGRA2 1

GO:0061314 BP Notch signaling involved in heart development 1/1105 11/16241

0.539452466 0.848475989 0.679849932 HEYL 1  
 GO:0071688 BP striated muscle myosin thick filament assembly 1/1105 11/16241  
 0.539452466 0.848475989 0.679849932 MYH11 1  
 GO:0072070 BP loop of Henle development 1/1105 11/16241 0.539452466 0.848475989  
 0.679849932 IRX1 1  
 GO:0072173 BP metanephric tubule morphogenesis 1/1105 11/16241 0.539452466  
 0.848475989 0.679849932 WNT9B 1  
 GO:0072310 BP glomerular epithelial cell development 1/1105 11/16241 0.539452466  
 0.848475989 0.679849932 ADIPOQ 1  
 GO:0072321 BP chaperone-mediated protein transport 1/1105 11/16241 0.539452466  
 0.848475989 0.679849932 CLIP3 1  
 GO:0072672 BP neutrophil extravasation 1/1105 11/16241 0.539452466 0.848475989  
 0.679849932 PECAM1 1  
 GO:0072683 BP T cell extravasation 1/1105 11/16241 0.539452466 0.848475989  
 0.679849932 CCR2 1  
 GO:0086067 BP AV node cell to bundle of His cell communication 1/1105 11/16241  
 0.539452466 0.848475989 0.679849932 CACNA1G1  
 GO:0090308 BP regulation of methylation-dependent chromatin silencing 1/1105  
 11/16241 0.539452466 0.848475989 0.679849932 APOBEC1 1  
 GO:1900165 BP negative regulation of interleukin-6 secretion 1/1105 11/16241  
 0.539452466 0.848475989 0.679849932 SYT11 1  
 GO:1900376 BP regulation of secondary metabolite biosynthetic process 1/1105  
 11/16241 0.539452466 0.848475989 0.679849932 ZEB2 1  
 GO:1901569 BP fatty acid derivative catabolic process 1/1105 11/16241 0.539452466  
 0.848475989 0.679849932 CYP4F2 1  
 GO:1902713 BP regulation of interferon-gamma secretion 1/1105 11/16241 0.539452466  
 0.848475989 0.679849932 IL36RN 1  
 GO:1902947 BP regulation of tau-protein kinase activity 1/1105 11/16241 0.539452466  
 0.848475989 0.679849932 DKK1 1  
 GO:1903441 BP protein localization to ciliary membrane 1/1105 11/16241 0.539452466  
 0.848475989 0.679849932 TUB 1  
 GO:1903817 BP negative regulation of voltage-gated potassium channel activity 1/1105  
 11/16241 0.539452466 0.848475989 0.679849932 KCNE4 1  
 GO:1905383 BP protein localization to presynapse 1/1105 11/16241 0.539452466  
 0.848475989 0.679849932 MAP1A 1  
 GO:1990440 BP positive regulation of transcription from RNA polymerase II promoter in  
 response to endoplasmic reticulum stress 1/1105 11/16241 0.539452466 0.848475989  
 0.679849932 CREB3L3 1  
 GO:2000615 BP regulation of histone H3-K9 acetylation 1/1105 11/16241 0.539452466  
 0.848475989 0.679849932 NAP1L2 1  
 GO:2001198 BP regulation of dendritic cell differentiation 1/1105 11/16241 0.539452466  
 0.848475989 0.679849932 FCGR2B 1  
 GO:2001204 BP regulation of osteoclast development 1/1105 11/16241 0.539452466  
 0.848475989 0.679849932 FBN1 1

GO:0008361 BP regulation of cell size 12/1105 176/16241 0.540039643 0.848861243  
0.680158621  
AKT3/APOE/CXCL12/EPHA7/FN1/KCNMA1/MAG/NGF/PLXNA4/PTPRS/SLC12A3/TNR 12

GO:0001933 BP negative regulation of protein phosphorylation 26/1105 384/16241  
0.540043034 0.848861243 0.680158621  
ADIPOQ/APOE/DACT1/DKK1/EMILIN1/FABP4/FBLN1/GFRA2/GREM1/HEG1/MYOC/PTPRC/  
RGS4/SFRP1/SFRP2/SLIT2/THY1/TIMP3/UCHL1/WWTR1/AMBP/BMP7/KLHL31/MLXIPL/PPP1R1B/  
XDH 26

GO:0072330 BP monocarboxylic acid biosynthetic process 22/1105 325/16241  
0.542091008 0.851807751 0.68251954  
ADIPOQ/BGN/CYP7B1/DCN/DSEL/HTR2A/IGF1/PLP1/PTGDS/PTGIS/QKI/VCAN/AGXT/AKR1C  
4/APOA4/APOA5/APOC3/CYP3A4/FADS6/LDHC/MLXIPL/PLA2G4F 22

GO:0072659 BP protein localization to plasma membrane 17/1105 251/16241  
0.544143376 0.854759278 0.684884481  
ACTN2/ADIPOQ/ANK2/AR/CDH2/CLIP3/DPP6/EHD2/EPHA3/FLNA/KCNB1/NFASC/RAB31/SO  
RBS1/STAC/ATP2C2/GPR158 17

GO:0051258 BP protein polymerization 18/1105 266/16241 0.544944967 0.855744782  
0.685674126  
ADD2/CASQ1/CASQ2/CCL21/CCR7/CLIP3/ELN/FMN2/GAS7/LMOD1/MAGEL2/NAV3/NEFL/S  
LIT2/STMN2/FGA/FGB/FGG 18

GO:0008645 BP hexose transmembrane transport 7/1105 102/16241 0.546710067  
0.857968003 0.687455504 ADIPOQ/CLIP3/EDNRA/IGF1/PRKCB/SORBS1/TERT 7

GO:0071887 BP leukocyte apoptotic process 7/1105 102/16241 0.546710067  
0.857968003 0.687455504 AXL/CCL19/CCL21/CCR7/CLC/CXCL12/GLI3 7

GO:0050773 BP regulation of dendrite development 10/1105 147/16241 0.547248552  
0.85853877 0.687912837  
ADGRB3/ALK/APOE/CHRNA3/NLGN1/PTPRS/RELN/SHANK1/BMP7/NR2E1 10

GO:0060998 BP regulation of dendritic spine development 5/1105 72/16241 0.547582637  
0.858788605 0.688113019 APOE/NLGN1/PTPRS/RELN/SHANK1 5

GO:0002440 BP production of molecular mediator of immune response 13/1105  
192/16241 0.548621995 0.85976397 0.688894541  
CCR2/CD22/CLC/ELANE/FCGR2B/FGL2/GAPT/IL12B/PTPRC/TGFB3/TLR9/APOA1/APOA2 13

GO:0033013 BP tetrapyrrole metabolic process 4/1105 57/16241 0.548904684  
0.85976397 0.688894541 AMBP/PRSS1/PRSS3/UGT1A1 4

GO:0051058 BP negative regulation of small GTPase mediated signal transduction 4/1105  
57/16241 0.548904684 0.85976397 0.688894541 HEG1/MYOC/SLIT2/TIMP2 4

GO:1904589 BP regulation of protein import 4/1105 57/16241 0.548904684 0.85976397  
0.688894541 AGTR2/FLNA/GLI3/CHP24

GO:0002534 BP cytokine production involved in inflammatory response 3/1105  
42/16241 0.551501892 0.86136003 0.6901734 F2/IL17A/IL17F 3

GO:0002833 BP positive regulation of response to biotic stimulus 3/1105 42/16241  
0.551501892 0.86136003 0.6901734 CRTAM/IL12B/HRG 3

GO:0015701 BP bicarbonate transport 3/1105 42/16241 0.551501892 0.86136003  
0.6901734 CA1/CA4/SLC26A3 3

GO:0030517 BP negative regulation of axon extension 3/1105 42/162410.551501892  
0.86136003 0.6901734 MAG/PTPRS/TNR 3

GO:0033173 BP calcineurin-NFAT signaling cascade 3/1105 42/162410.551501892  
0.86136003 0.6901734 IGF1/MYOZ2/CHP2 3

GO:0042987 BP amyloid precursor protein catabolic process 3/1105 42/162410.551501892  
0.86136003 0.6901734 APOE/IGF1/SPON1 3

GO:0045581 BP negative regulation of T cell differentiation 3/1105 42/162410.551501892  
0.86136003 0.6901734 FGL2/GLI3/IHH 3

GO:0045687 BP positive regulation of glial cell differentiation 3/1105 42/16241  
0.551501892 0.86136003 0.6901734 MAG/TENM4/NKX6-2 3

GO:1900271 BP regulation of long-term synaptic potentiation 3/1105 42/16241  
0.551501892 0.86136003 0.6901734 APOE/IGSF11/RELN 3

GO:0000187 BP activation of MAPK activity 10/1105 148/16241 0.556040104  
0.864263646 0.692499952  
ALK/CCL19/FGF10/FGF2/GHR/IGF1/PTPRC/TGFB3/THBS1/CXCL17 10

GO:0002700 BP regulation of production of molecular mediator of immune response 9/1105  
133/16241 0.556201666 0.864263646 0.692499952  
CCR2/CD22/CLC/FCGR2B/PTPRC/TGFB3/TLR9/APOA1/APOA2 9

GO:0003148 BP outflow tract septum morphogenesis 2/1105 27/162410.55691561  
0.864263646 0.692499952 NRP2/ZFPM2 2

GO:0010661 BP positive regulation of muscle cell apoptotic process 2/1105 27/16241  
0.55691561 0.864263646 0.692499952 CAMK2A/IL12B 2

GO:0015721 BP bile acid and bile salt transport 2/1105 27/162410.55691561  
0.864263646 0.692499952 ABCC2/AKR1C4 2

GO:0018195 BP peptidyl-arginine modification 2/1105 27/162410.55691561  
0.864263646 0.692499952 ART4/PADI3 2

GO:0031338 BP regulation of vesicle fusion 2/1105 27/162410.55691561 0.864263646  
0.692499952 GRIK5/SYT4 2

GO:0034472 BP snRNA 3'-end processing 2/1105 27/162410.55691561 0.864263646  
0.692499952 CT45A10/CT45A5 2

GO:0035883 BP enteroendocrine cell differentiation 2/1105 27/162410.55691561  
0.864263646 0.692499952 NEUROD1/RFX6 2

GO:0044550 BP secondary metabolite biosynthetic process 2/1105 27/162410.55691561  
0.864263646 0.692499952 ZEB2/SLC45A2 2

GO:0045577 BP regulation of B cell differentiation 2/1105 27/162410.55691561  
0.864263646 0.692499952 SFRP1/TLR9 2

GO:0051290 BP protein heterotetramerization 2/1105 27/162410.55691561  
0.864263646 0.692499952 KRT1/NLGN1 2

GO:0060259 BP regulation of feeding behavior 2/1105 27/162410.55691561  
0.864263646 0.692499952 CNR1/RETN 2

GO:0060632 BP regulation of microtubule-based movement 2/1105 27/162410.55691561  
0.864263646 0.692499952 ARMC4/TRIM58 2

GO:1900543 BP negative regulation of purine nucleotide metabolic process 2/1105  
27/162410.55691561 0.864263646 0.692499952 MLXIPL/PDZD3 2

GO:1903319 BP positive regulation of protein maturation 2/1105 27/162410.55691561  
0.864263646 0.692499952 SPON1/TFR2 2

GO:1903427 BP negative regulation of reactive oxygen species biosynthetic process 2/1105  
27/162410.55691561 0.864263646 0.692499952 PTGIS/SLC30A10 2

GO:1905144 BP response to acetylcholine 2/1105 27/162410.55691561 0.864263646  
0.692499952 CHRM2/CHRNA3 2

GO:1905145 BP cellular response to acetylcholine 2/1105 27/162410.55691561  
0.864263646 0.692499952 CHRM2/CHRNA3 2

GO:2000765 BP regulation of cytoplasmic translation 2/1105 27/162410.55691561  
0.864263646 0.692499952 CPEB1/RBM24 2

GO:0002456 BP T cell mediated immunity 7/1105 103/16241 0.557231875  
0.864263646 0.692499952 CCR2/CD1C/CLC/CLEC4G/FCGR2B/IL12B/PTPRC 7

GO:1901222 BP regulation of NIK/NF-kappaB signaling 7/1105 103/16241 0.557231875  
0.864263646 0.692499952 C1QTNF4/CCL19/IL12B/TLR7/TLR9/BMP7/TRIM40 7

GO:1901888 BP regulation of cell junction assembly 6/1105 88/162410.558318689  
0.865675948 0.693631572 EPHA3/MYOC/SFRP1/THBS1/THY1/HRG 6

GO:0002637 BP regulation of immunoglobulin production 4/1105 58/162410.562886687  
0.86617557 0.6940319 CD22/FCGR2B/PTPRC/TLR9 4

GO:0033619 BP membrane protein proteolysis 4/1105 58/162410.562886687  
0.86617557 0.6940319 APOE/NGFR/TIMP2/TIMP3 4

GO:1903706 BP regulation of hemopoiesis 29/1105 433/16241 0.563569017  
0.86617557 0.6940319  
ADIPOQ/AXL/C1QC/CARTPT/CCL19/CCR2/CR1/FBN1/FCGR2B/FGL2/GLI2/GLI3/HLA-DOA/IL1  
2B/LILRB4/LMO1/MYL9/PRKCB/PTPRC/ROR2/SFRP1/THBS1/TLR9/TRIM58/FOXN1/IHH/IL17A/PGL  
YRP3/PGLYRP429

GO:0009308 BP amine metabolic process 9/1105 134/16241 0.565393617  
0.86617557 0.6940319 AOC3/ATCAY/IDO2/INMT/ITGB2/MOXD1/VCAM1/ABCC2/DDC  
9

GO:0051494 BP negative regulation of cytoskeleton organization 9/1105 134/16241  
0.565393617 0.86617557 0.6940319  
ADD2/CLIP3/LMOD1/MYOC/NAV3/SHANK1/SLIT2/STMN2/TMEFF2 9

GO:0015749 BP monosaccharide transmembrane transport 7/1105 104/16241  
0.56764435 0.86617557 0.6940319  
ADIPOQ/CLIP3/EDNRA/IGF1/PRKCB/SORBS1/TERT 7

GO:0014047 BP glutamate secretion 3/1105 43/162410.567711549 0.86617557  
0.6940319 NPY5R/NTRK2/SYT4 3

GO:0042088 BP T-helper 1 type immune response 3/1105 43/162410.567711549  
0.86617557 0.6940319 CCL19/CCR2/IL12B 3

GO:0051293 BP establishment of spindle localization 3/1105 43/162410.567711549  
0.86617557 0.6940319 FGF10/FMN2/ACTL8 3

GO:1903580 BP positive regulation of ATP metabolic process 3/1105 43/162410.567711549  
0.86617557 0.6940319 HTR2A/IGF1/MLXIPL 3

GO:0002091 BP negative regulation of receptor internalization 1/1105 12/16241  
0.57080829 0.86617557 0.6940319 LRRTM1 1

GO:0003161 BP cardiac conduction system development 1/1105 12/162410.57080829  
 0.86617557 0.6940319 BVES 1  
 GO:0003207 BP cardiac chamber formation 1/1105 12/162410.57080829 0.86617557  
 0.6940319 HAND2 1  
 GO:0003334 BP keratinocyte development 1/1105 12/162410.57080829 0.86617557  
 0.6940319 PALLD 1  
 GO:0006216 BP cytidine catabolic process 1/1105 12/162410.57080829 0.86617557  
 0.6940319 APOBEC1 1  
 GO:0006995 BP cellular response to nitrogen starvation 1/1105 12/162410.57080829  
 0.86617557 0.6940319 MAP1LC3C 1  
 GO:0007077 BP mitotic nuclear envelope disassembly 1/1105 12/162410.57080829  
 0.86617557 0.6940319 PRKCB 1  
 GO:0008228 BP opsonization 1/1105 12/162410.57080829 0.86617557 0.6940319  
 C4BPB 1  
 GO:0009086 BP methionine biosynthetic process 1/1105 12/162410.57080829  
 0.86617557 0.6940319 BHMT2 1  
 GO:0009972 BP cytidine deamination 1/1105 12/162410.57080829 0.86617557  
 0.6940319 APOBEC1 1  
 GO:0010960 BP magnesium ion homeostasis 1/1105 12/162410.57080829 0.86617557  
 0.6940319 KCNA1 1  
 GO:0014029 BP neural crest formation 1/1105 12/162410.57080829 0.86617557  
 0.6940319 SFRP1 1  
 GO:0015697 BP quaternary ammonium group transport 1/1105 12/162410.57080829  
 0.86617557 0.6940319 SLC25A48 1  
 GO:0016081 BP synaptic vesicle docking 1/1105 12/162410.57080829 0.86617557  
 0.6940319 CAMK2A 1  
 GO:0021692 BP cerebellar Purkinje cell layer morphogenesis 1/1105 12/162410.57080829  
 0.86617557 0.6940319 LHX5 1  
 GO:0021903 BP rostrocaudal neural tube patterning 1/1105 12/162410.57080829  
 0.86617557 0.6940319 EN1 1  
 GO:0031034 BP myosin filament assembly 1/1105 12/162410.57080829 0.86617557  
 0.6940319 MYH11 1  
 GO:0032429 BP regulation of phospholipase A2 activity 1/1105 12/162410.57080829  
 0.86617557 0.6940319 AGTR1 1  
 GO:0033197 BP response to vitamin E 1/1105 12/162410.57080829 0.86617557  
 0.6940319 COL1A1 1  
 GO:0034356 BP NAD biosynthesis via nicotinamide riboside salvage pathway 1/1105  
 12/162410.57080829 0.86617557 0.6940319 PTGIS 1  
 GO:0035437 BP maintenance of protein localization in endoplasmic reticulum 1/1105  
 12/162410.57080829 0.86617557 0.6940319 GRIK5 1  
 GO:0036005 BP response to macrophage colony-stimulating factor 1/1105 12/16241  
 0.57080829 0.86617557 0.6940319 CSF1R 1  
 GO:0036006 BP cellular response to macrophage colony-stimulating factor stimulus 1/1105  
 12/162410.57080829 0.86617557 0.6940319 CSF1R 1

GO:0038180 BP nerve growth factor signaling pathway 1/1105 12/162410.57080829  
0.86617557 0.6940319 NGF 1

GO:0042368 BP vitamin D biosynthetic process 1/1105 12/162410.57080829  
0.86617557 0.6940319 CYP3A4 1

GO:0043562 BP cellular response to nitrogen levels 1/1105 12/162410.57080829  
0.86617557 0.6940319 MAP1LC3C 1

GO:0046087 BP cytidine metabolic process 1/1105 12/162410.57080829 0.86617557  
0.6940319 APOBEC1 1

GO:0046415 BP urate metabolic process 1/1105 12/162410.57080829 0.86617557  
0.6940319 G6PC 1

GO:0048302 BP regulation of isotype switching to IgG isotypes 1/1105 12/16241  
0.57080829 0.86617557 0.6940319 PTPRC 1

GO:0048711 BP positive regulation of astrocyte differentiation 1/1105 12/16241  
0.57080829 0.86617557 0.6940319 MAG 1

GO:0051132 BP NK T cell activation 1/1105 12/162410.57080829 0.86617557  
0.6940319 IL12B 1

GO:0051152 BP positive regulation of smooth muscle cell differentiation 1/1105  
12/162410.57080829 0.86617557 0.6940319 MYOCD 1

GO:0051608 BP histamine transport 1/1105 12/162410.57080829 0.86617557  
0.6940319 ADCYAP1 1

GO:0051798 BP positive regulation of hair follicle development 1/1105 12/16241  
0.57080829 0.86617557 0.6940319 FOXN1 1

GO:0060368 BP regulation of Fc receptor mediated stimulatory signaling pathway 1/1105  
12/162410.57080829 0.86617557 0.6940319 PTPRC 1

GO:0060391 BP positive regulation of SMAD protein signal transduction 1/1105  
12/162410.57080829 0.86617557 0.6940319 TGFB3 1

GO:0060453 BP regulation of gastric acid secretion 1/1105 12/162410.57080829  
0.86617557 0.6940319 PTGER3 1

GO:0060670 BP branching involved in labyrinthine layer morphogenesis 1/1105  
12/162410.57080829 0.86617557 0.6940319 RSPO3 1

GO:0060788 BP ectodermal placode formation 1/1105 12/162410.57080829  
0.86617557 0.6940319 NRG3 1

GO:0070486 BP leukocyte aggregation 1/1105 12/162410.57080829 0.86617557  
0.6940319 BMP7 1

GO:0071107 BP response to parathyroid hormone 1/1105 12/162410.57080829  
0.86617557 0.6940319 FGF23 1

GO:0071287 BP cellular response to manganese ion 1/1105 12/162410.57080829  
0.86617557 0.6940319 SLC30A10 1

GO:0071679 BP commissural neuron axon guidance 1/1105 12/162410.57080829  
0.86617557 0.6940319 NCAM1 1

GO:0071697 BP ectodermal placode morphogenesis 1/1105 12/162410.57080829  
0.86617557 0.6940319 NRG3 1

GO:0072520 BP seminiferous tubule development 1/1105 12/162410.57080829  
0.86617557 0.6940319 AR 1

GO:0072540 BP T-helper 17 cell lineage commitment 1/1105 12/162410.57080829  
 0.86617557 0.6940319 IL12B 1  
 GO:0090331 BP negative regulation of platelet aggregation 1/1105 12/162410.57080829  
 0.86617557 0.6940319 FGG 1  
 GO:0090520 BP sphingolipid mediated signaling pathway 1/1105 12/162410.57080829  
 0.86617557 0.6940319 S1PR3 1  
 GO:0097340 BP inhibition of cysteine-type endopeptidase activity 1/1105 12/16241  
 0.57080829 0.86617557 0.6940319 CARD18 1  
 GO:0097341 BP zymogen inhibition 1/1105 12/162410.57080829 0.86617557  
 0.6940319 CARD18 1  
 GO:0098962 BP regulation of postsynaptic neurotransmitter receptor activity 1/1105  
 12/162410.57080829 0.86617557 0.6940319 NPTX1 1  
 GO:0099640 BP axo-dendritic protein transport 1/1105 12/162410.57080829  
 0.86617557 0.6940319 MAP1A 1  
 GO:1900025 BP negative regulation of substrate adhesion-dependent cell spreading 1/1105  
 12/162410.57080829 0.86617557 0.6940319 FBLN1 1  
 GO:1900272 BP negative regulation of long-term synaptic potentiation 1/1105 12/16241  
 0.57080829 0.86617557 0.6940319 APOE 1  
 GO:1902287 BP semaphorin-plexin signaling pathway involved in axon guidance 1/1105  
 12/162410.57080829 0.86617557 0.6940319 PLXNA4 1  
 GO:1902337 BP regulation of apoptotic process involved in morphogenesis 1/1105  
 12/162410.57080829 0.86617557 0.6940319 BMP7 1  
 GO:1904748 BP regulation of apoptotic process involved in development 1/1105  
 12/162410.57080829 0.86617557 0.6940319 BMP7 1  
 GO:1904953 BP Wnt signaling pathway involved in midbrain dopaminergic neuron  
 differentiation 1/1105 12/162410.57080829 0.86617557 0.6940319 WNT9B 1  
 GO:2000105 BP positive regulation of DNA-dependent DNA replication 1/1105  
 12/162410.57080829 0.86617557 0.6940319 FGFR1 1  
 GO:1903312 BP negative regulation of mRNA metabolic process 5/1105 74/16241  
 0.572363906 0.868267914 0.695708412 DAZL/RBM24/VIP/APOBEC1/IGF2BP1 5  
 GO:0001889 BP liver development 9/1105 135/16241 0.574504006 0.870374928  
 0.697396678 FRZB/GLI3/LIMS2/IHH/OTC/PCK1/PCSK9/REG1A/UGT1A1 9  
 GO:0042267 BP natural killer cell mediated cytotoxicity 4/1105 59/162410.576628202  
 0.870374928 0.697396678 CRTAM/IL12B/IL21/KLRC4-KLRK1 4  
 GO:0001958 BP endochondral ossification 2/1105 28/162410.576942338 0.870374928  
 0.697396678 COL1A1/TMEM119 2  
 GO:0005979 BP regulation of glycogen biosynthetic process 2/1105 28/162410.576942338  
 0.870374928 0.697396678 IGF1/SORBS1 2  
 GO:0010962 BP regulation of glucan biosynthetic process 2/1105 28/162410.576942338  
 0.870374928 0.697396678 IGF1/SORBS1 2  
 GO:0035116 BP embryonic hindlimb morphogenesis 2/1105 28/162410.576942338  
 0.870374928 0.697396678 AFF3/RSPO2 2  
 GO:0036075 BP replacement ossification 2/1105 28/162410.576942338 0.870374928  
 0.697396678 COL1A1/TMEM119 2

GO:0042634 BP regulation of hair cycle 2/1105 28/162410.576942338 0.870374928  
 0.697396678 FOXN1/TERT 2  
 GO:0043171 BP peptide catabolic process 2/1105 28/162410.576942338 0.870374928  
 0.697396678 GGT5/CPN1 2  
 GO:0045980 BP negative regulation of nucleotide metabolic process 2/1105 28/16241  
 0.576942338 0.870374928 0.697396678 MLXIPL/PDZD3 2  
 GO:0048520 BP positive regulation of behavior 2/1105 28/162410.576942338  
 0.870374928 0.697396678 NLGN1/PENK 2  
 GO:0051647 BP nucleus localization 2/1105 28/162410.576942338 0.870374928  
 0.697396678 TRIM58/ACTL8 2  
 GO:0060142 BP regulation of syncytium formation by plasma membrane fusion 2/1105  
 28/162410.576942338 0.870374928 0.697396678 CXCL9/EHD2 2  
 GO:0061099 BP negative regulation of protein tyrosine kinase activity 2/1105 28/16241  
 0.576942338 0.870374928 0.697396678 PTPRC/THY1 2  
 GO:0071875 BP adrenergic receptor signaling pathway 2/1105 28/162410.576942338  
 0.870374928 0.697396678 ADRB3/PLN 2  
 GO:0072606 BP interleukin-8 secretion 2/1105 28/162410.576942338 0.870374928  
 0.697396678 FCN1/SSC5D 2  
 GO:1900027 BP regulation of ruffle assembly 2/1105 28/162410.576942338 0.870374928  
 0.697396678 NLGN1/P2RY12 2  
 GO:2000036 BP regulation of stem cell population maintenance 2/1105 28/16241  
 0.576942338 0.870374928 0.697396678 WNT9B/BMP7 2  
 GO:0007127 BP meiosis I 7/1105 105/16241 0.577942457 0.87134848 0.698176745  
 CCNA1/FMN2/HFM1/MEIKIN/PTTG2/MCMDC2/SYCP3 7  
 GO:2000278 BP regulation of DNA biosynthetic process 7/1105 105/16241 0.577942457  
 0.87134848 0.698176745 ADIPOQ/FGF2/GREM1/KCNK2/NPPC/PDGFRB/SMOC2 7  
 GO:0043123 BP positive regulation of I-kappaB kinase/NF-kappaB signaling 12/1105  
 181/16241 0.579874873 0.873993671 0.700296232  
 ADIPOQ/CCL19/CCL21/CCR7/CLEC6A/FLNA/LURAP1/PRKCB/TLR9/IL36G/IL36RN/IL37 12  
 GO:0036230 BP granulocyte activation 33/1105 496/16241 0.580149601 0.874139522  
 0.700413096  
 BPI/CCR2/CLEC4C/CR1/CRISPLD2/CTSG/CYBB/ELANE/FCGR2B/FCN1/FGL2/FRMPD3/GLIPR1/  
 ITGB2/KRT1/LAIR1/MPO/NFASC/PECAM1/PTPRC/RAB31/RETN/SERPINA3/TIMP2/DEFA1/DSG1/L  
 CN2/OLFM4/ORM1/ORM2/PRSS3/S100A7/TTR 33  
 GO:0015698 BP inorganic anion transport 11/1105 166/16241 0.580803352  
 0.874856199 0.700987341  
 ADAMTS8/FGFR1/GABRA5/LRRC18/SFRP4/SLC12A3/CLCA4/FGF23/GABRA4/SLC26A3/SLC34  
 A3 11  
 GO:0003197 BP endocardial cushion development 3/1105 44/162410.583555332  
 0.876334249 0.702171643 HEYL/RBM24/BMP7 3  
 GO:0009069 BP serine family amino acid metabolic process 3/1105 44/162410.583555332  
 0.876334249 0.702171643 CDO1/AGXT/AGXT2 3  
 GO:0038066 BP p38MAPK cascade 3/1105 44/162410.583555332 0.876334249  
 0.702171643 GDF6/HAND2/XDH 3

GO:0045933 BP positive regulation of muscle contraction 3/1105 44/162410.583555332  
0.876334249 0.702171643 MYOCD/SPX/TACR23

GO:0051646 BP mitochondrion localization 3/1105 44/162410.583555332 0.876334249  
0.702171643 ATCAY/NEFL/UCHL13

GO:0090382 BP phagosome maturation 3/1105 44/162410.583555332 0.876334249  
0.702171643 RAB31/SYT11/ATP6V1C23

GO:1902667 BP regulation of axon guidance 3/1105 44/162410.583555332 0.876334249  
0.702171643 CXCL12/PLXNA4/SLIT2 3

GO:0033143 BP regulation of intracellular steroid hormone receptor signaling pathway  
5/1105 75/162410.584485237 0.876334249 0.702171643  
AR/CYP7B1/HEYL/SFRP1/FOXH1 5

GO:1901224 BP positive regulation of NIK/NF-kappaB signaling 5/1105 75/16241  
0.584485237 0.876334249 0.702171643 C1QTNF4/CCL19/IL12B/TLR7/TLR95

GO:0071241 BP cellular response to inorganic substance 14/1105 212/16241  
0.585840244 0.876334249 0.702171643  
CYBB/FABP4/KCNA1/KCNK3/NLGN1/SERPINF1/SYT11/SYT4/SYT6/ADGRV1/CHP2/MMP3/SLC  
30A10/TFR2 14

GO:0009062 BP fatty acid catabolic process 7/1105 106/16241 0.58812147  
0.876334249 0.702171643 ADIPOQ/CNR1/ADTRP/CEL/CYP4F2/FABP1/PCK1 7

GO:0034219 BP carbohydrate transmembrane transport 7/1105 106/16241  
0.58812147 0.876334249 0.702171643  
ADIPOQ/CLIP3/EDNRA/IGF1/PRKCB/SORBS1/TERT 7

GO:0048639 BP positive regulation of developmental growth 11/1105 167/16241  
0.588928144 0.876334249 0.702171643  
CACNG7/CXCL12/FGF2/FGFR1/FN1/GHR/IGF1/NGF/SYT4/ZFPM2/REG1A 11

GO:0035308 BP negative regulation of protein dephosphorylation4/1105 60/16241  
0.590120829 0.876334249 0.702171643 PPP1R14C/PPP1R14D/PPP1R1B/PPP1R27 4

GO:0046323 BP glucose import 4/1105 60/162410.590120829 0.876334249  
0.702171643 ADIPOQ/IGF1/SORBS1/TERT 4

GO:1901880 BP negative regulation of protein depolymerization 4/1105 60/16241  
0.590120829 0.876334249 0.702171643 ADD2/LMOD1/NAV3/STMN2 4

GO:0046634 BP regulation of alpha-beta T cell activation 6/1105 91/162410.591608912  
0.876334249 0.702171643 CCL19/CCR2/GLI3/IL12B/PTPRC/IHH 6

GO:0007286 BP spermatid development 9/1105 137/16241 0.592466028 0.876334249  
0.702171643 DHH/JAM3/QKI/RIMBP3B/DEFB1/SEMG1/SLC26A3/SYCP3/TDRD5 9

GO:0000132 BP establishment of mitotic spindle orientation 2/1105 29/162410.596297881  
0.876334249 0.702171643 FGF10/ACTL8 2

GO:0001782 BP B cell homeostasis 2/1105 29/162410.596297881 0.876334249  
0.702171643 GAPT/TNFRSF13B 2

GO:0010591 BP regulation of lamellipodium assembly 2/1105 29/162410.596297881  
0.876334249 0.702171643 SLIT2/HRG 2

GO:0010743 BP regulation of macrophage derived foam cell differentiation 2/1105  
29/162410.596297881 0.876334249 0.702171643 ADIPOQ/AGTR1 2

GO:0014044 BP Schwann cell development 2/1105 29/162410.596297881 0.876334249

0.702171643 MYOC/NTRK2 2  
 GO:0021884 BP forebrain neuron development 2/1105 29/162410.596297881  
 0.876334249 0.702171643 NRP2/SLIT2 2  
 GO:0043372 BP positive regulation of CD4-positive, alpha-beta T cell differentiation 2/1105  
 29/162410.596297881 0.876334249 0.702171643 CCL19/IL12B 2  
 GO:0045589 BP regulation of regulatory T cell differentiation 2/1105 29/162410.596297881  
 0.876334249 0.702171643 CR1/LILRB4 2  
 GO:0046320 BP regulation of fatty acid oxidation 2/1105 29/162410.596297881  
 0.876334249 0.702171643 CNR1/FABP1 2  
 GO:0048147 BP negative regulation of fibroblast proliferation 2/1105 29/16241  
 0.596297881 0.876334249 0.702171643 AGTR2/SFRP1 2  
 GO:0061157 BP mRNA destabilization 2/1105 29/162410.596297881 0.876334249  
 0.702171643 RBM24/TRIM71 2  
 GO:2000171 BP negative regulation of dendrite development 2/1105 29/16241  
 0.596297881 0.876334249 0.702171643 NLGN1/PTPRS 2  
 GO:1990845 BP adaptive thermogenesis 10/1105 153/16241 0.598919055 0.876334249  
 0.702171643 ADCYAP1/ADIPOQ/ADRB3/CCR2/CMKLR1/EBF2/FABP4/NPR3/LCN2/YBX2 10  
 GO:0001504 BP neurotransmitter uptake 3/1105 45/162410.599024282 0.876334249  
 0.702171643 ATP1A2/RGS4/SLC6A2 3  
 GO:0007528 BP neuromuscular junction development 3/1105 45/162410.599024282  
 0.876334249 0.702171643 P2RX2/SHANK1/TNC 3  
 GO:0014888 BP striated muscle adaptation 3/1105 45/162410.599024282 0.876334249  
 0.702171643 IGFBP5/MYOC/MYOZ2 3  
 GO:0018198 BP peptidyl-cysteine modification 3/1105 45/162410.599024282  
 0.876334249 0.702171643 CLIP3/ZDHHC11/ZDHHC11B 3  
 GO:0045010 BP actin nucleation 3/1105 45/162410.599024282 0.876334249  
 0.702171643 FMN2/LMOD1/MAGEL2 3  
 GO:0048538 BP thymus development 3/1105 45/162410.599024282 0.876334249  
 0.702171643 FGF10/HAND2/FOXN1 3  
 GO:0060711 BP labyrinthine layer development 3/1105 45/162410.599024282  
 0.876334249 0.702171643 RSPO3/BMP7/CDX2 3  
 GO:0097720 BP calcineurin-mediated signaling 3/1105 45/162410.599024282  
 0.876334249 0.702171643 IGF1/MYOZ2/CHP2 3  
 GO:0001921 BP positive regulation of receptor recycling 1/1105 13/162410.600031091  
 0.876334249 0.702171643 BVES 1  
 GO:0001967 BP suckling behavior 1/1105 13/162410.600031091 0.876334249  
 0.702171643 HAND2 1  
 GO:0002281 BP macrophage activation involved in immune response 1/1105 13/16241  
 0.600031091 0.876334249 0.702171643 SUCNR1 1  
 GO:0002829 BP negative regulation of type 2 immune response 1/1105 13/16241  
 0.600031091 0.876334249 0.702171643 CCR2 1  
 GO:0003084 BP positive regulation of systemic arterial blood pressure 1/1105 13/16241  
 0.600031091 0.876334249 0.702171643 SPX 1  
 GO:0006703 BP estrogen biosynthetic process 1/1105 13/162410.600031091

0.876334249 0.702171643 HSD3B1 1  
 GO:0006705 BP mineralocorticoid biosynthetic process 1/1105 13/162410.600031091  
 0.876334249 0.702171643 HSD3B1 1  
 GO:0008212 BP mineralocorticoid metabolic process 1/1105 13/162410.600031091  
 0.876334249 0.702171643 HSD3B1 1  
 GO:0008298 BP intracellular mRNA localization 1/1105 13/162410.600031091  
 0.876334249 0.702171643 A1CF 1  
 GO:0009650 BP UV protection 1/1105 13/162410.600031091 0.876334249 0.702171643  
 MFAP4 1  
 GO:0010663 BP positive regulation of striated muscle cell apoptotic process 1/1105  
 13/162410.600031091 0.876334249 0.702171643 CAMK2A 1  
 GO:0010666 BP positive regulation of cardiac muscle cell apoptotic process 1/1105  
 13/162410.600031091 0.876334249 0.702171643 CAMK2A 1  
 GO:0010745 BP negative regulation of macrophage derived foam cell differentiation 1/1105  
 13/162410.600031091 0.876334249 0.702171643 ADIPOQ 1  
 GO:0014819 BP regulation of skeletal muscle contraction 1/1105 13/162410.600031091  
 0.876334249 0.702171643 CASQ1 1  
 GO:0014842 BP regulation of skeletal muscle satellite cell proliferation 1/1105 13/16241  
 0.600031091 0.876334249 0.702171643 FGF2 1  
 GO:0019627 BP urea metabolic process 1/1105 13/162410.600031091 0.876334249  
 0.702171643 OTC 1  
 GO:0021681 BP cerebellar granular layer development 1/1105 13/162410.600031091  
 0.876334249 0.702171643 CBLN1 1  
 GO:0031033 BP myosin filament organization 1/1105 13/162410.600031091 0.876334249  
 0.702171643 MYH11 1  
 GO:0031054 BP pre-miRNA processing 1/1105 13/162410.600031091 0.876334249  
 0.702171643 LIN28B 1  
 GO:0032536 BP regulation of cell projection size 1/1105 13/162410.600031091  
 0.876334249 0.702171643 NEFL 1  
 GO:0033004 BP negative regulation of mast cell activation 1/1105 13/162410.600031091  
 0.876334249 0.702171643 CNR1 1  
 GO:0035563 BP positive regulation of chromatin binding 1/1105 13/162410.600031091  
 0.876334249 0.702171643 EBF21  
 GO:0035810 BP positive regulation of urine volume 1/1105 13/162410.600031091  
 0.876334249 0.702171643 NPR3 1  
 GO:0042178 BP xenobiotic catabolic process 1/1105 13/162410.600031091 0.876334249  
 0.702171643 UGT1A1 1  
 GO:0042487 BP regulation of odontogenesis of dentin-containing tooth 1/1105  
 13/162410.600031091 0.876334249 0.702171643 RSPO2 1  
 GO:0042908 BP xenobiotic transport 1/1105 13/162410.600031091 0.876334249  
 0.702171643 NR1I2 1  
 GO:0043455 BP regulation of secondary metabolic process 1/1105 13/162410.600031091  
 0.876334249 0.702171643 ZEB2 1  
 GO:0043970 BP histone H3-K9 acetylation 1/1105 13/162410.600031091 0.876334249

0.702171643 NAP1L2 1  
 GO:0045006 BP DNA deamination 1/1105 13/162410.600031091 0.876334249  
 0.702171643 APOBEC1 1  
 GO:0045086 BP positive regulation of interleukin-2 biosynthetic process 1/1105  
 13/162410.600031091 0.876334249 0.702171643 PTPRC 1  
 GO:0045591 BP positive regulation of regulatory T cell differentiation 1/1105 13/16241  
 0.600031091 0.876334249 0.702171643 LILRB4 1  
 GO:0045986 BP negative regulation of smooth muscle contraction 1/1105 13/16241  
 0.600031091 0.876334249 0.702171643 KCNMA1 1  
 GO:0046349 BP amino sugar biosynthetic process 1/1105 13/162410.600031091  
 0.876334249 0.702171643 GFPT2 1  
 GO:0046629 BP gamma-delta T cell activation 1/1105 13/162410.600031091 0.876334249  
 0.702171643 PTPRC 1  
 GO:0047484 BP regulation of response to osmotic stress 1/1105 13/162410.600031091  
 0.876334249 0.702171643 EPO 1  
 GO:0048291 BP isotype switching to IgG isotypes 1/1105 13/162410.600031091  
 0.876334249 0.702171643 PTPRC 1  
 GO:0048505 BP regulation of timing of cell differentiation 1/1105 13/162410.600031091  
 0.876334249 0.702171643 NR2E1 1  
 GO:0050862 BP positive regulation of T cell receptor signaling pathway 1/1105  
 13/162410.600031091 0.876334249 0.702171643 CCR7 1  
 GO:0051280 BP negative regulation of release of sequestered calcium ion into cytosol  
 1/1105 13/162410.600031091 0.876334249 0.702171643 CASQ2 1  
 GO:0051386 BP regulation of neurotrophin TRK receptor signaling pathway 1/1105  
 13/162410.600031091 0.876334249 0.702171643 AGTR2 1  
 GO:0060044 BP negative regulation of cardiac muscle cell proliferation 1/1105 13/16241  
 0.600031091 0.876334249 0.702171643 KCNK2 1  
 GO:0060100 BP positive regulation of phagocytosis, engulfment 1/1105 13/16241  
 0.600031091 0.876334249 0.702171643 RAB31 1  
 GO:0060347 BP heart trabecula formation 1/1105 13/162410.600031091 0.876334249  
 0.702171643 ADAMTS1 1  
 GO:0061029 BP eyelid development in camera-type eye 1/1105 13/162410.600031091  
 0.876334249 0.702171643 GRHL3 1  
 GO:0071285 BP cellular response to lithium ion 1/1105 13/162410.600031091  
 0.876334249 0.702171643 FABP4 1  
 GO:0071696 BP ectodermal placode development 1/1105 13/162410.600031091  
 0.876334249 0.702171643 NRG3 1  
 GO:0071872 BP cellular response to epinephrine stimulus 1/1105 13/162410.600031091  
 0.876334249 0.702171643 ADIPOQ 1  
 GO:0072044 BP collecting duct development 1/1105 13/162410.600031091 0.876334249  
 0.702171643 WNT9B 1  
 GO:0072182 BP regulation of nephron tubule epithelial cell differentiation 1/1105  
 13/162410.600031091 0.876334249 0.702171643 WWTR1 1  
 GO:0090141 BP positive regulation of mitochondrial fission 1/1105 13/162410.600031091

0.876334249 0.702171643 DCN 1

GO:0098712 BP L-glutamate import across plasma membrane 1/1105 13/16241

0.600031091 0.876334249 0.702171643 ATP1A2 1

GO:0099188 BP postsynaptic cytoskeleton organization 1/1105 13/16241 0.600031091

0.876334249 0.702171643 NEFL 1

GO:1900037 BP regulation of cellular response to hypoxia 1/1105 13/16241 0.600031091

0.876334249 0.702171643 KCNK2 1

GO:1901160 BP primary amino compound metabolic process 1/1105 13/16241

0.600031091 0.876334249 0.702171643 DDC 1

GO:1901550 BP regulation of endothelial cell development 1/1105 13/16241 0.600031091

0.876334249 0.702171643 S1PR3 1

GO:1901722 BP regulation of cell proliferation involved in kidney development 1/1105

13/16241 0.600031091 0.876334249 0.702171643 BMP7 1

GO:1902570 BP protein localization to nucleolus 1/1105 13/16241 0.600031091

0.876334249 0.702171643 TERT1

GO:1902894 BP negative regulation of pri-miRNA transcription by RNA polymerase II 1/1105

13/16241 0.600031091 0.876334249 0.702171643 LILRB4 1

GO:1902931 BP negative regulation of alcohol biosynthetic process 1/1105 13/16241

0.600031091 0.876334249 0.702171643 APOE 1

GO:1903140 BP regulation of establishment of endothelial barrier 1/1105 13/16241

0.600031091 0.876334249 0.702171643 S1PR3 1

GO:1905155 BP positive regulation of membrane invagination 1/1105 13/16241

0.600031091 0.876334249 0.702171643 RAB31 1

GO:1990403 BP embryonic brain development 1/1105 13/16241 0.600031091

0.876334249 0.702171643 EN1 1

GO:2000009 BP negative regulation of protein localization to cell surface 1/1105

13/16241 0.600031091 0.876334249 0.702171643 ACTN2 1

GO:0006469 BP negative regulation of protein kinase activity 14/1105 214/16241

0.600160507 0.876334249 0.702171643

ADIPOQ/APOE/FABP4/HEG1/MYOC/PTPRC/RGS4/SFRP1/SFRP2/THY1/UCHL1/WWTR1/BM

P7/PPP1R1B 14

GO:0061008 BP hepaticobiliary system development 9/1105 138/16241 0.601311069

0.877753335 0.7033087 FRZB/GLI3/LIMS2/IHH/OTC/PCK1/PCSK9/REG1A/UGT1A1 9

GO:0009584 BP detection of visible light 4/1105 61/16241 0.603357199 0.880216977

0.705282718 GPR88/GNGT1/REEP6/RGR 4

GO:1904377 BP positive regulation of protein localization to cell periphery 4/1105

61/16241 0.603357199 0.880216977 0.705282718 CLIP3/EPHA3/SORBS1/STAC 4

GO:0009266 BP response to temperature stimulus 15/1105 230/16241 0.605902283

0.883143031 0.707627249

ARPP21/CAMK2A/CASQ1/CRYAB/CXCL12/HSPB8/HTR2A/IGF1/KCNK4/STAC/TGFB11/THBS1/

ABCC2/P2RX3/PRDM12 15

GO:0016358 BP dendrite development 15/1105 230/16241 0.605902283 0.883143031

0.707627249

ADGRB3/ALK/APOE/CAMK2A/CHRNA3/DCLK1/MAP1A/NLGN1/NTN3/PTPRS/RELN/SHANK1/

SLITRK5/BMP7/NR2E1 15

GO:0033673 BP negative regulation of kinase activity 15/1105 230/16241 0.605902283  
0.883143031 0.707627249  
ADIPOQ/APOE/FABP4/HEG1/MYOC/PTPRC/RGS4/SFRP1/SFRP2/THY1/UCHL1/WWTR1/BMP7/FOXA2/PPP1R1B 15

GO:0031109 BP microtubule polymerization or depolymerization 7/1105 108/16241  
0.608104851 0.885378529 0.709418464  
CLIP3/CRYAB/MAP1A/NAV3/STMN2/STMN4/STMND1 7

GO:0035050 BP embryonic heart tube development 5/1105 77/16241 0.608156994  
0.885378529 0.709418464 HAND2/FOLR1/FOXH1/IHH/NOTO 5

GO:0045913 BP positive regulation of carbohydrate metabolic process 5/1105 77/16241  
0.608156994 0.885378529 0.709418464 ADCYAP1R1/HTR2A/IGF1/SORBS1/MLXIPL 5

GO:0097061 BP dendritic spine organization 5/1105 77/16241 0.608156994 0.885378529  
0.709418464 APOE/FCGR2B/NLGN1/RELN/SHANK1 5

GO:0002824 BP positive regulation of adaptive immune response based on somatic recombination of immune receptors built from immunoglobulin superfamily domains 6/1105  
93/16241 0.613052274 0.890037016 0.713151124  
CCL19/CCR2/CD1C/FCER2/IL12B/PTPRC 6

GO:0042158 BP lipoprotein biosynthetic process 6/1105 93/16241 0.613052274  
0.890037016 0.713151124 APOE/CLIP3/APOA1/APOBEC1/ZDHHC11/ZDHHC11B 6

GO:0097327 BP response to antineoplastic agent 6/1105 93/16241 0.613052274  
0.890037016 0.713151124 AGTR2/NEFL/SERPINF1/ABCC2/EPO/PCK1 6

GO:0002711 BP positive regulation of T cell mediated immunity 3/1105 46/16241  
0.614111232 0.890037016 0.713151124 CD1C/IL12B/PTPRC 3

GO:0007140 BP male meiotic nuclear division 3/1105 46/16241 0.614111232 0.890037016  
0.713151124 CCNA1/MEIKIN/SYCP3 3

GO:0008206 BP bile acid metabolic process 3/1105 46/16241 0.614111232 0.890037016  
0.713151124 CYP7B1/AKR1C4/SULT2A1 3

GO:0043300 BP regulation of leukocyte degranulation 3/1105 46/16241 0.614111232  
0.890037016 0.713151124 CCR2/FCGR2B/ITGB2 3

GO:0050912 BP detection of chemical stimulus involved in sensory perception of taste 3/1105 46/16241 0.614111232 0.890037016 0.713151124 CST2/RTP5/TAS2R38 3

GO:0090342 BP regulation of cell aging 3/1105 46/16241 0.614111232 0.890037016  
0.713151124 AKT3/SLC30A10/TERT 3

GO:0010165 BP response to X-ray 2/1105 30/16241 0.614980788 0.890037016  
0.713151124 SFRP1/SFRP2 2

GO:0010613 BP positive regulation of cardiac muscle hypertrophy 2/1105 30/16241  
0.614980788 0.890037016 0.713151124 HAND2/IGF1 2

GO:0014742 BP positive regulation of muscle hypertrophy 2/1105 30/16241 0.614980788  
0.890037016 0.713151124 HAND2/IGF1 2

GO:0032743 BP positive regulation of interleukin-2 production 2/1105 30/16241  
0.614980788 0.890037016 0.713151124 CCR2/PTPRC 2

GO:0042168 BP heme metabolic process 2/1105 30/16241 0.614980788 0.890037016  
0.713151124 AMBP/UGT1A1 2

GO:0042491 BP inner ear auditory receptor cell differentiation 2/1105 30/16241  
 0.614980788 0.890037016 0.713151124 FGFR1/ATOH1 2  
 GO:0048873 BP homeostasis of number of cells within a tissue 2/1105 30/16241  
 0.614980788 0.890037016 0.713151124 AKT3/CCR2 2  
 GO:0090314 BP positive regulation of protein targeting to membrane 2/1105 30/16241  
 0.614980788 0.890037016 0.713151124 ITGB2/KCNB1 2  
 GO:1902230 BP negative regulation of intrinsic apoptotic signaling pathway in response to  
 DNA damage 2/1105 30/16241 0.614980788 0.890037016 0.713151124 CXCL12/SFRP2 2  
 GO:1902235 BP regulation of endoplasmic reticulum stress-induced intrinsic apoptotic  
 signaling pathway 2/1105 30/16241 0.614980788 0.890037016 0.713151124  
 MAGEA3/RNF183 2  
 GO:1904837 BP beta-catenin-TCF complex assembly 2/1105 30/16241 0.614980788  
 0.890037016 0.713151124 DACT1/TERT 2  
 GO:0099003 BP vesicle-mediated transport in synapse 13/1105 201/16241 0.616069446  
 0.890120488 0.713218006  
 CAMK2A/CHRM2/CHRNA6/CNR1/GRIK5/HTR2A/NLGN1/PRKCB/SNAP91/SYT11/SYT4/SYT6/  
 CEL 13  
 GO:0045453 BP bone resorption 4/1105 62/16241 0.616330926 0.890120488  
 0.713218006 CARTPT/CSF1R/TMEM119/IHH 4  
 GO:0046637 BP regulation of alpha-beta T cell differentiation 4/1105 62/16241  
 0.616330926 0.890120488 0.713218006 CCL19/GLI3/IL12B/IHH 4  
 GO:0048813 BP dendrite morphogenesis 9/1105 140/16241 0.618714057 0.890120488  
 0.713218006 ADGRB3/CAMK2A/CHRNA3/DCLK1/NLGN1/RELN/SHANK1/SLITRK5/NR2E1  
 9  
 GO:0045132 BP meiotic chromosome segregation 5/1105 78/16241 0.619696374  
 0.890120488 0.713218006 FMN2/HFM1/MEIKIN/PTTG2/MCMDC25  
 GO:0051099 BP positive regulation of binding 11/1105 171/16241 0.620696479  
 0.890120488 0.713218006  
 ADD2/APOE/DACT1/EBF2/HAND2/IGF1/MYOC/NGF/SPON1/NEUROD1/TERT 11  
 GO:0030307 BP positive regulation of cell growth 10/1105 156/16241 0.623678  
 0.890120488 0.713218006  
 CACNG7/CXCL12/FN1/IGF1/NGF/SFRP1/SFRP2/SYT4/F2/REG1A 10  
 GO:0071375 BP cellular response to peptide hormone stimulus 20/1105 309/16241  
 0.625212934 0.890120488 0.713218006  
 ACTN2/ADCY2/ADCY5/ADIPOQ/AGTR1/AGTR2/CAMK2A/CPEB1/FBN1/GHR/GLP2R/PRKCB/R  
 AB31/SORBS1/APOBEC1/ATP6V1C2/PCK1/PCSK9/REG1A/SLC30A10 20  
 GO:0003352 BP regulation of cilium movement 1/1105 14/16241 0.627265849  
 0.890120488 0.713218006 ARMC4 1  
 GO:0006878 BP cellular copper ion homeostasis 1/1105 14/16241 0.627265849  
 0.890120488 0.713218006 PRND 1  
 GO:0010715 BP regulation of extracellular matrix disassembly 1/1105 14/16241  
 0.627265849 0.890120488 0.713218006 DDR2 1  
 GO:0010935 BP regulation of macrophage cytokine production 1/1105 14/16241  
 0.627265849 0.890120488 0.713218006 TGFB3 1

GO:0014733 BP regulation of skeletal muscle adaptation 1/1105 14/162410.627265849  
0.890120488 0.713218006 IGFBP5 1

GO:0014841 BP skeletal muscle satellite cell proliferation 1/1105 14/162410.627265849  
0.890120488 0.713218006 FGF2 1

GO:0014854 BP response to inactivity 1/1105 14/162410.627265849 0.890120488  
0.713218006 CASQ1 1

GO:0014857 BP regulation of skeletal muscle cell proliferation 1/1105 14/16241  
0.627265849 0.890120488 0.713218006 FGF2 1

GO:0020027 BP hemoglobin metabolic process 1/1105 14/162410.627265849  
0.890120488 0.713218006 EPO 1

GO:0021527 BP spinal cord association neuron differentiation 1/1105 14/16241  
0.627265849 0.890120488 0.713218006 LHX5 1

GO:0021535 BP cell migration in hindbrain 1/1105 14/162410.627265849 0.890120488  
0.713218006 FLNA 1

GO:0030213 BP hyaluronan biosynthetic process 1/1105 14/162410.627265849  
0.890120488 0.713218006 HAS1 1

GO:0032486 BP Rap protein signal transduction 1/1105 14/162410.627265849  
0.890120488 0.713218006 TIMP2 1

GO:0032688 BP negative regulation of interferon-beta production 1/1105 14/16241  
0.627265849 0.890120488 0.713218006 PTPRS 1

GO:0034393 BP positive regulation of smooth muscle cell apoptotic process 1/1105  
14/162410.627265849 0.890120488 0.713218006 IL12B 1

GO:0034616 BP response to laminar fluid shear stress 1/1105 14/162410.627265849  
0.890120488 0.713218006 TGFB3 1

GO:0035278 BP miRNA mediated inhibition of translation 1/1105 14/162410.627265849  
0.890120488 0.713218006 TRIM71 1

GO:0035358 BP regulation of peroxisome proliferator activated receptor signaling pathway  
1/1105 14/162410.627265849 0.890120488 0.713218006 PTGIS 1

GO:0035435 BP phosphate ion transmembrane transport 1/1105 14/162410.627265849  
0.890120488 0.713218006 ADAMTS8 1

GO:0036295 BP cellular response to increased oxygen levels 1/1105 14/162410.627265849  
0.890120488 0.713218006 NOX1 1

GO:0040033 BP negative regulation of translation, ncRNA-mediated 1/1105 14/16241  
0.627265849 0.890120488 0.713218006 TRIM71 1

GO:0040034 BP regulation of development, heterochronic 1/1105 14/162410.627265849  
0.890120488 0.713218006 NR2E1 1

GO:0042574 BP retinal metabolic process 1/1105 14/162410.627265849 0.890120488  
0.713218006 CYP1B1 1

GO:0043374 BP CD8-positive, alpha-beta T cell differentiation 1/1105 14/16241  
0.627265849 0.890120488 0.713218006 TNFSF8 1

GO:0045019 BP negative regulation of nitric oxide biosynthetic process 1/1105  
14/162410.627265849 0.890120488 0.713218006 PTGIS 1

GO:0045651 BP positive regulation of macrophage differentiation 1/1105 14/16241  
0.627265849 0.890120488 0.713218006 ROR2 1

GO:0045836 BP positive regulation of meiotic nuclear division 1/1105 14/16241  
0.627265849 0.890120488 0.713218006 DAZL 1

GO:0045838 BP positive regulation of membrane potential 1/1105 14/162410.627265849  
0.890120488 0.713218006 TCL1A 1

GO:0045974 BP regulation of translation, ncRNA-mediated 1/1105 14/162410.627265849  
0.890120488 0.713218006 TRIM71 1

GO:0046133 BP pyrimidine ribonucleoside catabolic process 1/1105 14/162410.627265849  
0.890120488 0.713218006 APOBEC1 1

GO:0051044 BP positive regulation of membrane protein ectodomain proteolysis 1/1105  
14/162410.627265849 0.890120488 0.713218006 APOE 1

GO:0051284 BP positive regulation of sequestering of calcium ion 1/1105 14/16241  
0.627265849 0.890120488 0.713218006 CASQ2 1

GO:0051938 BP L-glutamate import 1/1105 14/162410.627265849 0.890120488  
0.713218006 ATP1A2 1

GO:0060009 BP Sertoli cell development 1/1105 14/162410.627265849 0.890120488  
0.713218006 FLNA 1

GO:0060397 BP JAK-STAT cascade involved in growth hormone signaling pathway 1/1105  
14/162410.627265849 0.890120488 0.713218006 GHR 1

GO:0060732 BP positive regulation of inositol phosphate biosynthetic process 1/1105  
14/162410.627265849 0.890120488 0.713218006 ADCYAP1R1 1

GO:0070307 BP lens fiber cell development 1/1105 14/162410.627265849 0.890120488  
0.713218006 VIM 1

GO:0070885 BP negative regulation of calcineurin-NFAT signaling cascade 1/1105  
14/162410.627265849 0.890120488 0.713218006 MYOZ2 1

GO:0071391 BP cellular response to estrogen stimulus 1/1105 14/162410.627265849  
0.890120488 0.713218006 SFRP1 1

GO:0071605 BP monocyte chemotactic protein-1 production 1/1105 14/162410.627265849  
0.890120488 0.713218006 ADIPOQ 1

GO:0071637 BP regulation of monocyte chemotactic protein-1 production 1/1105  
14/162410.627265849 0.890120488 0.713218006 ADIPOQ 1

GO:0071941 BP nitrogen cycle metabolic process 1/1105 14/162410.627265849  
0.890120488 0.713218006 OTC 1

GO:0090128 BP regulation of synapse maturation 1/1105 14/162410.627265849  
0.890120488 0.713218006 RELN 1

GO:0090197 BP positive regulation of chemokine secretion 1/1105 14/162410.627265849  
0.890120488 0.713218006 CSF1R 1

GO:0090494 BP dopamine uptake 1/1105 14/162410.627265849 0.890120488  
0.713218006 SLC6A2 1

GO:0097329 BP response to antimetabolite 1/1105 14/162410.627265849 0.890120488  
0.713218006 ABCC2 1

GO:0106057 BP negative regulation of calcineurin-mediated signaling 1/1105 14/16241  
0.627265849 0.890120488 0.713218006 MYOZ2 1

GO:1901841 BP regulation of high voltage-gated calcium channel activity 1/1105  
14/162410.627265849 0.890120488 0.713218006 FGF14 1

GO:1902656 BP calcium ion import into cytosol 1/1105 14/162410.627265849  
0.890120488 0.713218006 MS4A1 1

GO:1902969 BP mitotic DNA replication 1/1105 14/162410.627265849 0.890120488  
0.713218006 FGFR1 1

GO:1904406 BP negative regulation of nitric oxide metabolic process 1/1105 14/16241  
0.627265849 0.890120488 0.713218006 PTGIS 1

GO:1905063 BP regulation of vascular smooth muscle cell differentiation 1/1105  
14/162410.627265849 0.890120488 0.713218006 MYOCD 1

GO:2000291 BP regulation of myoblast proliferation 1/1105 14/162410.627265849  
0.890120488 0.713218006 KCNA5 1

GO:2000345 BP regulation of hepatocyte proliferation 1/1105 14/162410.627265849  
0.890120488 0.713218006 LIMS2 1

GO:2001212 BP regulation of vasculogenesis 1/1105 14/162410.627265849 0.890120488  
0.713218006 XDH 1

GO:0042119 BP neutrophil activation 32/1105 491/16241 0.627405872 0.890120488  
0.713218006  
BPI/CLEC4C/CR1/CRISPLD2/CTSG/CYBB/ELANE/FCGR2B/FCN1/FGL2/FRMPD3/GLIPR1/ITGB2  
/KRT1/LAIR1/MPO/NFASC/PECAM1/PTPRC/RAB31/RETN/SERPINA3/TIMP2/DEFA1/DSG1/LCN2/O  
LFM4/ORM1/ORM2/PRSS3/S100A7/TTR 32

GO:0061982 BP meiosis I cell cycle process 7/1105 110/16241 0.627562779  
0.890120488 0.713218006 CCNA1/FMN2/HFM1/MEIKIN/PTTG2/MCMDC2/SYCP3 7

GO:0008542 BP visual learning 3/1105 47/162410.628810687 0.890120488 0.713218006  
ATP1A2/NETO1/PPP1R1B 3

GO:0030834 BP regulation of actin filament depolymerization 3/1105 47/16241  
0.628810687 0.890120488 0.713218006 ACTN2/ADD2/LMOD1 3

GO:0030865 BP cortical cytoskeleton organization 3/1105 47/162410.628810687  
0.890120488 0.713218006 EHD2/NLGN1/WIPF1 3

GO:0031050 BP dsRNA processing 3/1105 47/162410.628810687 0.890120488  
0.713218006 LIN28B/TERT/TRIM71 3

GO:0034260 BP negative regulation of GTPase activity 3/1105 47/162410.628810687  
0.890120488 0.713218006 ADCYAP1/KLRC4-KLRK1/SLIT23

GO:0035722 BP interleukin-12-mediated signaling pathway 3/1105 47/162410.628810687  
0.890120488 0.713218006 IL12B/CA1/GSTA2 3

GO:0043949 BP regulation of cAMP-mediated signaling 3/1105 47/162410.628810687  
0.890120488 0.713218006 ADCYAP1/ADCYAP1R1/PDE3A3

GO:0061614 BP pri-miRNA transcription by RNA polymerase II 3/1105 47/16241  
0.628810687 0.890120488 0.713218006 LILRB4/NGFR/TERT 3

GO:0070918 BP production of small RNA involved in gene silencing by RNA 3/1105  
47/162410.628810687 0.890120488 0.713218006 LIN28B/TERT/TRIM71 3

GO:0097035 BP regulation of membrane lipid distribution 3/1105 47/162410.628810687  
0.890120488 0.713218006 ATP8B2/XKR4/ATP10B 3

GO:2001239 BP regulation of extrinsic apoptotic signaling pathway in absence of ligand  
3/1105 47/162410.628810687 0.890120488 0.713218006 FGF10/FGFR1/TERT3

GO:0002228 BP natural killer cell mediated immunity 4/1105 63/162410.629036565

0.890183695 0.713268652 CRTAM/IL12B/IL21/KLRC4-KLRK1 4  
 GO:0002446 BP neutrophil mediated immunity 32/1105 492/16241 0.63203578  
 0.893008095 0.715531731  
 BPI/CLEC4C/CR1/CRISPLD2/CTSG/CYBB/ELANE/FCN1/FGL2/FRMPD3/GLIPR1/ITGB2/KRT1/L  
 AIR1/MPO/NFASC/PECAM1/PTPRC/RAB31/RETN/SERPINA3/TIMP2/DEFA1/DSG1/F2/LCN2/OLFM  
 4/ORM1/ORM2/PRSS3/S100A7/TTR 32  
 GO:0001881 BP receptor recycling 2/1105 31/162410.632992911 0.893008095  
 0.715531731 BVES/PCSK9 2  
 GO:0002724 BP regulation of T cell cytokine production 2/1105 31/162410.632992911  
 0.893008095 0.715531731 CCR2/CLC2  
 GO:0009154 BP purine ribonucleotide catabolic process 2/1105 31/162410.632992911  
 0.893008095 0.715531731 NUDT10/NUDT11 2  
 GO:0014904 BP myotube cell development 2/1105 31/162410.632992911 0.893008095  
 0.715531731 IGF1/P2RX2 2  
 GO:0040020 BP regulation of meiotic nuclear division 2/1105 31/162410.632992911  
 0.893008095 0.715531731 DAZL/PDE3A 2  
 GO:0042036 BP negative regulation of cytokine biosynthetic process 2/1105 31/16241  
 0.632992911 0.893008095 0.715531731 ELANE/PTPRC 2  
 GO:0050779 BP RNA destabilization 2/1105 31/162410.632992911 0.893008095  
 0.715531731 RBM24/TRIM71 2  
 GO:0051150 BP regulation of smooth muscle cell differentiation 2/1105 31/16241  
 0.632992911 0.893008095 0.715531731 MYOCD/RBPMS2 2  
 GO:1902895 BP positive regulation of pri-miRNA transcription by RNA polymerase II 2/1105  
 31/162410.632992911 0.893008095 0.715531731 NGFR/TERT 2  
 GO:0050852 BP T cell receptor signaling pathway 12/1105 188/16241 0.633032204  
 0.893008095 0.715531731  
 CCR7/HLA-DPA1/HLA-DPB1/HLA-DQA1/HLA-DQA2/HLA-DQB2/LILRB4/PTPRC/THY1/BTNL3/B  
 TNL8/HHLA2 12  
 GO:0060996 BP dendritic spine development 6/1105 95/162410.633852889 0.893909098  
 0.716253669 APOE/CAMK2A/NLGN1/PTPRS/RELN/SHANK1 6  
 GO:0032147 BP activation of protein kinase activity 21/1105 326/16241 0.635471309  
 0.895934291 0.717876375  
 ADCY2/ADCY5/ALK/ANGPT4/CARTPT/CCL19/CHRNA3/FGF10/FGF2/GHR/GREM1/IGF1/IL12B  
 /NGF/NRG3/NRK/PTPRC/TGFB3/THBS1/CXCL17/EPO 21  
 GO:0009615 BP response to virus 20/1105 311/16241 0.636761339 0.897327053  
 0.718992339  
 ABCC9/ACTA2/CCL19/CHRM2/CXCL12/CXCL9/DCLK1/FGL2/FLNA/IL12B/PENK/PTPRC/TLR7/T  
 LR8/TLR9/APOBEC1/DEFA1/DMBT1/DUOX2/LCN2 20  
 GO:0043666 BP regulation of phosphoprotein phosphatase activity 7/1105 111/16241  
 0.637086083 0.897327053 0.718992339  
 AGTR2/PDGFRB/PTPRC/PPP1R14C/PPP1R14D/PPP1R1B/PPP1R27 7  
 GO:0050864 BP regulation of B cell activation 7/1105 111/16241 0.637086083  
 0.897327053 0.718992339 CD22/FCGR2B/IL21/PTPRC/SFRP1/TLR9/TNFRSF13B 7  
 GO:0043312 BP neutrophil degranulation 31/1105 478/16241 0.637189894

0.897327053 0.718992339  
 BPI/CLEC4C/CR1/CRISPLD2/CTSG/CYBB/ELANE/FCN1/FGL2/FRMPD3/GLIPR1/ITGB2/KRT1/L  
 AIR1/MPO/NFASC/PECAM1/PTPRC/RAB31/RETN/SERPINA3/TIMP2/DEFA1/DSG1/LCN2/OLFM4/O  
 RM1/ORM2/PRSS3/S100A7/TTR 31  
 GO:0042113 BP B cell activation 15/1105 235/16241 0.639357086 0.899748943  
 0.720932903  
 CD22/CR2/FCGR2B/FCRL1/FLT3/GAPT/IL21/MS4A1/PRKCB/PTPRC/SFRP1/TLR9/TNFRSF13B/  
 VCAM1/CDH17 15  
 GO:0002705 BP positive regulation of leukocyte mediated immunity 8/1105 127/16241  
 0.640525603 0.899748943 0.720932903  
 CD1C/CRTAM/FCER2/IL12B/IL21/ITGB2/KLRC4-KLRK1/PTPRC 8  
 GO:0006213 BP pyrimidine nucleoside metabolic process 3/1105 48/16241 0.643118697  
 0.899748943 0.720932903 DPYS/NT5C1A/APOBEC13  
 GO:0031113 BP regulation of microtubule polymerization 3/1105 48/16241 0.643118697  
 0.899748943 0.720932903 CLIP3/NAV3/STMN2 3  
 GO:0048641 BP regulation of skeletal muscle tissue development 3/1105 48/16241  
 0.643118697 0.899748943 0.720932903 DKK1/MYOC/D/RBM24 3  
 GO:0051653 BP spindle localization 3/1105 48/16241 0.643118697 0.899748943  
 0.720932903 FGF10/FMN2/ACTL8 3  
 GO:0060042 BP retina morphogenesis in camera-type eye 3/1105 48/16241 0.643118697  
 0.899748943 0.720932903 RORB/THY1/IHH 3  
 GO:0042326 BP negative regulation of phosphorylation 27/1105 419/16241 0.64490246  
 0.899748943 0.720932903  
 ADIPOQ/APOE/DACT1/DKK1/EMILIN1/FABP4/FBLN1/GFRA2/GREM1/HEG1/MYOC/D/PTPRC/  
 RGS4/SFRP1/SFRP2/SLIT2/THY1/TIMP3/UCHL1/WWTR1/AMBP/BMP7/FOXA2/KLHL31/MLXIPL/PP  
 P1R1B/XDH 27  
 GO:0030217 BP T cell differentiation 15/1105 236/16241 0.645874489 0.899748943  
 0.720932903  
 CCL19/CCR2/CCR7/CR1/FGL2/GLI2/GLI3/HLA-DOA/IL12B/LILRB4/PLA2G2D/PTPRC/TNFSF8/F  
 OXN1/IHH 15  
 GO:0030518 BP intracellular steroid hormone receptor signaling pathway 8/1105  
 128/16241 0.649283608 0.899748943 0.720932903  
 AR/CYP7B1/HEYL/SFRP1/TGFB1I1/DEFA1/FOXH1/SCGB2A18  
 GO:0001975 BP response to amphetamine 2/1105 32/16241 0.650338958 0.899748943  
 0.720932903 RGS4/PPP1R1B 2  
 GO:0002714 BP positive regulation of B cell mediated immunity 2/1105 32/16241  
 0.650338958 0.899748943 0.720932903 FCER2/PTPRC 2  
 GO:0002891 BP positive regulation of immunoglobulin mediated immune response 2/1105  
 32/16241 0.650338958 0.899748943 0.720932903 FCER2/PTPRC 2  
 GO:0009261 BP ribonucleotide catabolic process 2/1105 32/16241 0.650338958  
 0.899748943 0.720932903 NUDT10/NUDT11 2  
 GO:0016180 BP snRNA processing 2/1105 32/16241 0.650338958 0.899748943  
 0.720932903 CT45A10/CT45A5 2  
 GO:0031112 BP positive regulation of microtubule polymerization or depolymerization

2/1105 32/162410.650338958 0.899748943 0.720932903 NAV3/STMN2 2  
 GO:0033363 BP secretory granule organization 2/1105 32/162410.650338958  
 0.899748943 0.720932903 PTPRN/SYT4 2  
 GO:0042558 BP pteridine-containing compound metabolic process 2/1105 32/16241  
 0.650338958 0.899748943 0.720932903 FOLR2/FOLR1 2  
 GO:0045601 BP regulation of endothelial cell differentiation 2/1105 32/162410.650338958  
 0.899748943 0.720932903 S1PR3/XDH 2  
 GO:0045745 BP positive regulation of G protein-coupled receptor signaling pathway 2/1105  
 32/162410.650338958 0.899748943 0.720932903 GRP/F2 2  
 GO:0048821 BP erythrocyte development 2/1105 32/162410.650338958 0.899748943  
 0.720932903 TRIM58/EPO 2  
 GO:0048841 BP regulation of axon extension involved in axon guidance 2/1105  
 32/162410.650338958 0.899748943 0.720932903 CXCL12/PLXNA4 2  
 GO:1901031 BP regulation of response to reactive oxygen species 2/1105 32/16241  
 0.650338958 0.899748943 0.720932903 FBLN5/BMP7 2  
 GO:1904037 BP positive regulation of epithelial cell apoptotic process 2/1105 32/16241  
 0.650338958 0.899748943 0.720932903 SFRP4/THBS1 2  
 GO:0002283 BP neutrophil activation involved in immune response 31/1105 481/16241  
 0.651040065 0.899748943 0.720932903  
 BPI/CLEC4C/CR1/CRISPLD2/CTSG/CYBB/ELANE/FCN1/FGL2/FRMPD3/GLIPR1/ITGB2/KRT1/L  
 AIR1/MPO/NFASC/PECAM1/PTPRC/RAB31/RETN/SERPINA3/TIMP2/DEFA1/DSG1/LCN2/OLFM4/O  
 RM1/ORM2/PRSS3/S100A7/TTR 31  
 GO:0034249 BP negative regulation of cellular amide metabolic process 9/1105  
 144/16241 0.652297779 0.899748943 0.720932903  
 APOE/C8orf88/CPEB1/IGF1/IGFBP5/RBM24/SPON1/IGF2BP1/TRIM71 9  
 GO:0000712 BP resolution of meiotic recombination intermediates 1/1105 15/16241  
 0.652647696 0.899748943 0.720932903 HFM1 1  
 GO:0001711 BP endodermal cell fate commitment 1/1105 15/162410.652647696  
 0.899748943 0.720932903 DKK1 1  
 GO:0001829 BP trophectodermal cell differentiation 1/1105 15/162410.652647696  
 0.899748943 0.720932903 CDX2 1  
 GO:0002467 BP germinal center formation 1/1105 15/162410.652647696 0.899748943  
 0.720932903 CXCL13 1  
 GO:0002475 BP antigen processing and presentation via MHC class Ib 1/1105 15/16241  
 0.652647696 0.899748943 0.720932903 CD1C 1  
 GO:0002643 BP regulation of tolerance induction 1/1105 15/162410.652647696  
 0.899748943 0.720932903 CLC 1  
 GO:0006000 BP fructose metabolic process 1/1105 15/162410.652647696 0.899748943  
 0.720932903 FBP2 1  
 GO:0006491 BP N-glycan processing 1/1105 15/162410.652647696 0.899748943  
 0.720932903 ST8SIA2 1  
 GO:0007039 BP protein catabolic process in the vacuole 1/1105 15/162410.652647696  
 0.899748943 0.720932903 CPA2 1  
 GO:0007216 BP G protein-coupled glutamate receptor signaling pathway 1/1105

15/162410.652647696 0.899748943 0.720932903 GRIK3 1  
 GO:0007342 BP fusion of sperm to egg plasma membrane involved in single fertilization  
 1/1105 15/162410.652647696 0.899748943 0.720932903 FOLR2 1  
 GO:0007512 BP adult heart development 1/1105 15/162410.652647696 0.899748943  
 0.720932903 HAND2 1  
 GO:0009109 BP coenzyme catabolic process 1/1105 15/162410.652647696 0.899748943  
 0.720932903 CYP4F2 1  
 GO:0014856 BP skeletal muscle cell proliferation 1/1105 15/162410.652647696  
 0.899748943 0.720932903 FGF2 1  
 GO:0014874 BP response to stimulus involved in regulation of muscle adaptation 1/1105  
 15/162410.652647696 0.899748943 0.720932903 CASQ1 1  
 GO:0015671 BP oxygen transport 1/1105 15/162410.652647696 0.899748943  
 0.720932903 NGB 1  
 GO:0016540 BP protein autoprocessing 1/1105 15/162410.652647696 0.899748943  
 0.720932903 PCSK9 1  
 GO:0018027 BP peptidyl-lysine dimethylation 1/1105 15/162410.652647696 0.899748943  
 0.720932903 PRDM12 1  
 GO:0030214 BP hyaluronan catabolic process 1/1105 15/162410.652647696 0.899748943  
 0.720932903 FGF2 1  
 GO:0034111 BP negative regulation of homotypic cell-cell adhesion 1/1105 15/16241  
 0.652647696 0.899748943 0.720932903 FGG 1  
 GO:0034349 BP glial cell apoptotic process 1/1105 15/162410.652647696 0.899748943  
 0.720932903 AKAP12 1  
 GO:0035269 BP protein O-linked mannosylation 1/1105 15/162410.652647696  
 0.899748943 0.720932903 TMTC1 1  
 GO:0036445 BP neuronal stem cell division 1/1105 15/162410.652647696 0.899748943  
 0.720932903 FGFR1 1  
 GO:0042159 BP lipoprotein catabolic process 1/1105 15/162410.652647696 0.899748943  
 0.720932903 APOE 1  
 GO:0042362 BP fat-soluble vitamin biosynthetic process 1/1105 15/162410.652647696  
 0.899748943 0.720932903 CYP3A4 1  
 GO:0043517 BP positive regulation of DNA damage response, signal transduction by p53 class  
 mediator 1/1105 15/162410.652647696 0.899748943 0.720932903 HIC1 1  
 GO:0043584 BP nose development 1/1105 15/162410.652647696 0.899748943  
 0.720932903 GLI3 1  
 GO:0045073 BP regulation of chemokine biosynthetic process 1/1105 15/16241  
 0.652647696 0.899748943 0.720932903 ELANE 1  
 GO:0045116 BP protein neddylation 1/1105 15/162410.652647696 0.899748943  
 0.720932903 TRIM40 1  
 GO:0045717 BP negative regulation of fatty acid biosynthetic process 1/1105 15/16241  
 0.652647696 0.899748943 0.720932903 APOC3 1  
 GO:0046321 BP positive regulation of fatty acid oxidation 1/1105 15/162410.652647696  
 0.899748943 0.720932903 FABP1 1  
 GO:0046838 BP phosphorylated carbohydrate dephosphorylation 1/1105 15/16241

0.652647696 0.899748943 0.720932903 G6PC 1  
 GO:0055057 BP neuroblast division 1/1105 15/162410.652647696 0.899748943  
 0.720932903 FGFR1 1  
 GO:0060099 BP regulation of phagocytosis, engulfment 1/1105 15/162410.652647696  
 0.899748943 0.720932903 RAB31 1  
 GO:0060841 BP venous blood vessel development 1/1105 15/162410.652647696  
 0.899748943 0.720932903 HEG1 1  
 GO:0071360 BP cellular response to exogenous dsRNA 1/1105 15/162410.652647696  
 0.899748943 0.720932903 COLEC12 1  
 GO:0071474 BP cellular hyperosmotic response 1/1105 15/162410.652647696  
 0.899748943 0.720932903 EPO 1  
 GO:0071599 BP otic vesicle development 1/1105 15/162410.652647696 0.899748943  
 0.720932903 FGF10 1  
 GO:0071732 BP cellular response to nitric oxide 1/1105 15/162410.652647696  
 0.899748943 0.720932903 MMP3 1  
 GO:0071786 BP endoplasmic reticulum tubular network organization 1/1105 15/16241  
 0.652647696 0.899748943 0.720932903 REEP2 1  
 GO:0072160 BP nephron tubule epithelial cell differentiation 1/1105 15/162410.652647696  
 0.899748943 0.720932903 WWTR1 1  
 GO:0090196 BP regulation of chemokine secretion 1/1105 15/162410.652647696  
 0.899748943 0.720932903 CSF1R 1  
 GO:0090493 BP catecholamine uptake 1/1105 15/162410.652647696 0.899748943  
 0.720932903 SLC6A2 1  
 GO:0098840 BP protein transport along microtubule 1/1105 15/162410.652647696  
 0.899748943 0.720932903 MAP1A 1  
 GO:0098911 BP regulation of ventricular cardiac muscle cell action potential 1/1105  
 15/162410.652647696 0.899748943 0.720932903 CTNNA3 1  
 GO:0099118 BP microtubule-based protein transport 1/1105 15/162410.652647696  
 0.899748943 0.720932903 MAP1A 1  
 GO:0099558 BP maintenance of synapse structure 1/1105 15/162410.652647696  
 0.899748943 0.720932903 ADGRB3 1  
 GO:1900119 BP positive regulation of execution phase of apoptosis 1/1105 15/16241  
 0.652647696 0.899748943 0.720932903 PTGIS 1  
 GO:2000484 BP positive regulation of interleukin-8 secretion 1/1105 15/16241  
 0.652647696 0.899748943 0.720932903 FCN1 1  
 GO:0006855 BP drug transmembrane transport 5/1105 81/162410.653074648  
 0.899832446 0.72099981 ATP1A2/FOLR2/RGS4/ABCC2/FOLR1 5  
 GO:2000106 BP regulation of leukocyte apoptotic process 5/1105 81/162410.653074648  
 0.899832446 0.72099981 AXL/CCL19/CCL21/CCR7/CXCL12 5  
 GO:0002532 BP production of molecular mediator involved in inflammatory response  
 4/1105 65/162410.653626222 0.900072004 0.721191759 SERPINE1/F2/IL17A/IL17F  
 4  
 GO:0015800 BP acidic amino acid transport 4/1105 65/162410.653626222 0.900072004  
 0.721191759 ATP1A2/NPY5R/NTRK2/SYT4 4

GO:0006885 BP regulation of pH 6/1105 97/162410.65398147 0.900072004  
0.721191759 ATP1A4/ATP6V1C2/NOX1/RHCG/SLC26A3/SLC9A2 6

GO:0044264 BP cellular polysaccharide metabolic process 6/1105 97/162410.65398147  
0.900072004 0.721191759 EXTL1/HAS1/IGF1/PYGM/SORBS1/G6PC 6

GO:0019882 BP antigen processing and presentation 14/1105 222/16241 0.655088507  
0.901343066 0.72221021  
CCL19/CCL21/CCR7/CD1C/CYBB/FCGR2B/FGL2/HLA-DOA/HLA-DPA1/HLA-DPB1/HLA-DQA1/  
HLA-DQA2/HLA-DQB2/THBS114

GO:0051222 BP positive regulation of protein transport 26/1105 406/16241 0.655790551  
0.902056339 0.722781727  
AGTR2/AKAP12/BLK/C1QTNF4/CCL19/CLEC6A/CLEC9A/CRTAM/CSF1R/FCN1/FLNA/GLI3/IGF  
1/ITGB2/KCNB1/TGFB3/TLR8/CHP2/FGA/FGB/FGG/IL17A/IL17F/ORM1/ORM2/RFX626

GO:0006636 BP unsaturated fatty acid biosynthetic process 3/1105 49/162410.65703274  
0.903259115 0.723745464 PTGDS/PTGIS/PLA2G4F 3

GO:0071349 BP cellular response to interleukin-12 3/1105 49/162410.65703274  
0.903259115 0.723745464 IL12B/CA1/GSTA2 3

GO:0031333 BP negative regulation of protein complex assembly 8/1105 129/16241  
0.657917522 0.904222403 0.724517307  
ADD2/CLIP3/CRYAB/DACT1/DKK1/LMOD1/SLIT2/STMN2 8

GO:0016051 BP carbohydrate biosynthetic process 13/1105 207/16241 0.658219879  
0.904384907 0.724647516  
ADCYAP1R1/ADIPOQ/CHST8/EXTL1/HAS1/IGF1/SORBS1/ST6GALNAC5/ST8SIA6/FBP2/FUT3/  
G6PC/PCK1 13

GO:0003300 BP cardiac muscle hypertrophy 5/1105 82/162410.66377574 0.909140208  
0.728457748 AGTR2/HAND2/IGF1/PI16/RGS4 5

GO:0006919 BP activation of cysteine-type endopeptidase activity involved in apoptotic  
process 5/1105 82/162410.66377574 0.909140208 0.728457748  
COL4A3/NGF/NGFR/KHDC1L/XDH 5

GO:0006970 BP response to osmotic stress 5/1105 82/162410.66377574 0.909140208  
0.728457748 FMO1/KCNMA1/MYLK/APOBEC1/EPO 5

GO:0002821 BP positive regulation of adaptive immune response 6/1105 98/16241  
0.663786272 0.909140208 0.728457748 CCL19/CCR2/CD1C/FCER2/IL12B/PTPRC 6

GO:0051865 BP protein autoubiquitination 4/1105 66/162410.66550364 0.909140208  
0.728457748 TRIM58/RNF183/RNF186/TRIM71 4

GO:0032386 BP regulation of intracellular transport 26/1105 408/16241 0.665591074  
0.909140208 0.728457748  
ACTN2/ADIPOQ/AGTR2/BVES/CAMK2A/CHRM2/CHRNA6/CNR1/CRYAB/EHD2/FLNA/GAS1/G  
LI3/GRIK5/HTR2A/ITGB2/KCNB1/NLGN1/PLN/PRKCB/REEP2/SYT4/TRIM58/CHP2/PCSK9/REEP6  
26

GO:0003230 BP cardiac atrium development 2/1105 33/162410.667026105 0.909140208  
0.728457748 ANK2/HEG1 2

GO:0032594 BP protein transport within lipid bilayer 2/1105 33/162410.667026105  
0.909140208 0.728457748 CACNG7/REEP2 2

GO:0032633 BP interleukin-4 production 2/1105 33/162410.667026105 0.909140208

0.728457748 CLECL1/SCGB1A1 2  
 GO:0032892 BP positive regulation of organic acid transport 2/1105 33/162410.667026105  
 0.909140208 0.728457748 SYT4/CYP4F2 2  
 GO:0040001 BP establishment of mitotic spindle localization 2/1105 33/162410.667026105  
 0.909140208 0.728457748 FGF10/ACTL8 2  
 GO:0042755 BP eating behavior 2/1105 33/162410.667026105 0.909140208  
 0.728457748 NPY5R/UCHL1 2  
 GO:0043243 BP positive regulation of protein complex disassembly 2/1105 33/16241  
 0.667026105 0.909140208 0.728457748 ACTN2/STMN2 2  
 GO:0051443 BP positive regulation of ubiquitin-protein transferase activity 2/1105  
 33/162410.667026105 0.909140208 0.728457748 MAGEA2/MAGEA2B 2  
 GO:0070873 BP regulation of glycogen metabolic process 2/1105 33/162410.667026105  
 0.909140208 0.728457748 IGF1/SORBS1 2  
 GO:1901385 BP regulation of voltage-gated calcium channel activity 2/1105 33/16241  
 0.667026105 0.909140208 0.728457748 FGF14/STAC 2  
 GO:0030042 BP actin filament depolymerization 3/1105 50/162410.670551607  
 0.909140208 0.728457748 ACTN2/ADD2/LMOD1 3  
 GO:0032653 BP regulation of interleukin-10 production 3/1105 50/162410.670551607  
 0.909140208 0.728457748 FCGR2B/IL12B/TLR9 3  
 GO:0070671 BP response to interleukin-12 3/1105 50/162410.670551607 0.909140208  
 0.728457748 IL12B/CA1/GSTA2 3  
 GO:2000677 BP regulation of transcription regulatory region DNA binding 3/1105  
 50/162410.670551607 0.909140208 0.728457748 HAND2/IGF1/NEUROD1 3  
 GO:0045446 BP endothelial cell differentiation 6/1105 99/162410.673414826  
 0.909140208 0.728457748 COL4A4/HEG1/PECAM1/PTPRS/S1PR3/XDH 6  
 GO:0002718 BP regulation of cytokine production involved in immune response 5/1105  
 83/162410.674259788 0.909140208 0.728457748 CCR2/CLC/TGFB3/APOA1/APOA2 5  
 GO:0034504 BP protein localization to nucleus 16/1105 256/16241 0.674441214  
 0.909140208 0.728457748  
 AGTR2/COL1A1/DCLK1/FLNA/GLI3/LILRB4/NGFR/PRICKLE1/SIX2/SYNE1/BMP7/CHP2/F2/SIX  
 3/TERT/TRIM40 16  
 GO:0001977 BP renal system process involved in regulation of blood volume 1/1105  
 16/162410.676302589 0.909140208 0.728457748 CYP4F2 1  
 GO:0002295 BP T-helper cell lineage commitment 1/1105 16/162410.676302589  
 0.909140208 0.728457748 IL12B 1  
 GO:0006047 BP UDP-N-acetylglucosamine metabolic process 1/1105 16/16241  
 0.676302589 0.909140208 0.728457748 GFPT2 1  
 GO:0006089 BP lactate metabolic process 1/1105 16/162410.676302589 0.909140208  
 0.728457748 LDHC 1  
 GO:0006206 BP pyrimidine nucleobase metabolic process 1/1105 16/162410.676302589  
 0.909140208 0.728457748 DPYS 1  
 GO:0010744 BP positive regulation of macrophage derived foam cell differentiation 1/1105  
 16/162410.676302589 0.909140208 0.728457748 AGTR1 1  
 GO:0010829 BP negative regulation of glucose transmembrane transport 1/1105

16/162410.676302589 0.909140208 0.728457748 PRKCB 1  
 GO:0010919 BP regulation of inositol phosphate biosynthetic process 1/1105 16/16241  
 0.676302589 0.909140208 0.728457748 ADCYAP1R1 1  
 GO:0010934 BP macrophage cytokine production 1/1105 16/162410.676302589  
 0.909140208 0.728457748 TGFB3 1  
 GO:0014866 BP skeletal myofibril assembly 1/1105 16/162410.676302589 0.909140208  
 0.728457748 MYH11 1  
 GO:0015732 BP prostaglandin transport 1/1105 16/162410.676302589 0.909140208  
 0.728457748 ABCC2 1  
 GO:0016246 BP RNA interference 1/1105 16/162410.676302589 0.909140208  
 0.728457748 TERT1  
 GO:0017121 BP phospholipid scrambling 1/1105 16/162410.676302589 0.909140208  
 0.728457748 XKR4 1  
 GO:0030033 BP microvillus assembly 1/1105 16/162410.676302589 0.909140208  
 0.728457748 MYO1A 1  
 GO:0030397 BP membrane disassembly 1/1105 16/162410.676302589 0.909140208  
 0.728457748 PRKCB 1  
 GO:0032305 BP positive regulation of icosanoid secretion 1/1105 16/162410.676302589  
 0.909140208 0.728457748 CYP4F2 1  
 GO:0032460 BP negative regulation of protein oligomerization 1/1105 16/16241  
 0.676302589 0.909140208 0.728457748 CRYAB 1  
 GO:0033145 BP positive regulation of intracellular steroid hormone receptor signaling  
 pathway 1/1105 16/162410.676302589 0.909140208 0.728457748 AR 1  
 GO:0033631 BP cell-cell adhesion mediated by integrin 1/1105 16/162410.676302589  
 0.909140208 0.728457748 CXCL13 1  
 GO:0035313 BP wound healing, spreading of epidermal cells 1/1105 16/162410.676302589  
 0.909140208 0.728457748 COL5A1 1  
 GO:0035372 BP protein localization to microtubule 1/1105 16/162410.676302589  
 0.909140208 0.728457748 MAP1A 1  
 GO:0036158 BP outer dynein arm assembly 1/1105 16/162410.676302589 0.909140208  
 0.728457748 ARMC4 1  
 GO:0038092 BP nodal signaling pathway 1/1105 16/162410.676302589 0.909140208  
 0.728457748 FOXH1 1  
 GO:0042033 BP chemokine biosynthetic process 1/1105 16/162410.676302589  
 0.909140208 0.728457748 ELANE 1  
 GO:0042448 BP progesterone metabolic process 1/1105 16/162410.676302589  
 0.909140208 0.728457748 AKR1C4 1  
 GO:0044849 BP estrous cycle 1/1105 16/162410.676302589 0.909140208 0.728457748  
 HAS1 1  
 GO:0045721 BP negative regulation of gluconeogenesis 1/1105 16/162410.676302589  
 0.909140208 0.728457748 ADIPOQ 1  
 GO:0046459 BP short-chain fatty acid metabolic process 1/1105 16/162410.676302589  
 0.909140208 0.728457748 PCK1 1  
 GO:0048268 BP clathrin coat assembly 1/1105 16/162410.676302589 0.909140208

0.728457748 SNAP91 1  
 GO:0048311 BP mitochondrion distribution 1/1105 16/162410.676302589 0.909140208  
 0.728457748 ATCAY 1  
 GO:0050755 BP chemokine metabolic process 1/1105 16/162410.676302589  
 0.909140208 0.728457748 ELANE 1  
 GO:0050774 BP negative regulation of dendrite morphogenesis 1/1105 16/16241  
 0.676302589 0.909140208 0.728457748 NLGN1 1  
 GO:0051016 BP barbed-end actin filament capping 1/1105 16/162410.676302589  
 0.909140208 0.728457748 ADD2 1  
 GO:0051081 BP nuclear envelope disassembly 1/1105 16/162410.676302589  
 0.909140208 0.728457748 PRKCB 1  
 GO:0051151 BP negative regulation of smooth muscle cell differentiation 1/1105  
 16/162410.676302589 0.909140208 0.728457748 RBPMS2 1  
 GO:0055012 BP ventricular cardiac muscle cell differentiation 1/1105 16/16241  
 0.676302589 0.909140208 0.728457748 MYOCD 1  
 GO:0060117 BP auditory receptor cell development 1/1105 16/162410.676302589  
 0.909140208 0.728457748 FGFR1 1  
 GO:0060149 BP negative regulation of posttranscriptional gene silencing 1/1105  
 16/162410.676302589 0.909140208 0.728457748 TERT1  
 GO:0060628 BP regulation of ER to Golgi vesicle-mediated transport 1/1105 16/16241  
 0.676302589 0.909140208 0.728457748 GAS1 1  
 GO:0060967 BP negative regulation of gene silencing by RNA 1/1105 16/16241  
 0.676302589 0.909140208 0.728457748 TERT1  
 GO:0061323 BP cell proliferation involved in heart morphogenesis 1/1105 16/16241  
 0.676302589 0.909140208 0.728457748 HAND2 1  
 GO:0061684 BP chaperone-mediated autophagy 1/1105 16/162410.676302589  
 0.909140208 0.728457748 SYNPO2 1  
 GO:0061687 BP detoxification of inorganic compound 1/1105 16/162410.676302589  
 0.909140208 0.728457748 ABCC2 1  
 GO:0070200 BP establishment of protein localization to telomere 1/1105 16/16241  
 0.676302589 0.909140208 0.728457748 TERT1  
 GO:0070293 BP renal absorption 1/1105 16/162410.676302589 0.909140208  
 0.728457748 ADIPOQ 1  
 GO:0070525 BP tRNA threonylcarbamoyladenosine metabolic process 1/1105 16/16241  
 0.676302589 0.909140208 0.728457748 CTAG2 1  
 GO:0071380 BP cellular response to prostaglandin E stimulus 1/1105 16/16241  
 0.676302589 0.909140208 0.728457748 SFRP1 1  
 GO:0072189 BP ureter development 1/1105 16/162410.676302589 0.909140208  
 0.728457748 EMX2 1  
 GO:1900363 BP regulation of mRNA polyadenylation 1/1105 16/162410.676302589  
 0.909140208 0.728457748 CPEB1 1  
 GO:1902001 BP fatty acid transmembrane transport 1/1105 16/162410.676302589  
 0.909140208 0.728457748 THBS1 1  
 GO:1902358 BP sulfate transmembrane transport 1/1105 16/162410.676302589

0.909140208 0.728457748 SLC26A3 1  
 GO:1903830 BP magnesium ion transmembrane transport 1/1105 16/162410.676302589  
 0.909140208 0.728457748 NIPAL4 1  
 GO:1903978 BP regulation of microglial cell activation 1/1105 16/162410.676302589  
 0.909140208 0.728457748 PTPRC 1  
 GO:2000047 BP regulation of cell-cell adhesion mediated by cadherin 1/1105 16/16241  
 0.676302589 0.909140208 0.728457748 FOXA2 1  
 GO:2000136 BP regulation of cell proliferation involved in heart morphogenesis 1/1105  
 16/162410.676302589 0.909140208 0.728457748 HAND2 1  
 GO:2000479 BP regulation of cAMP-dependent protein kinase activity 1/1105 16/16241  
 0.676302589 0.909140208 0.728457748 ADIPOQ 1  
 GO:0006695 BP cholesterol biosynthetic process 4/1105 67/162410.677099679  
 0.909465032 0.728718017 APOE/APOA1/APOA4/APOA5 4  
 GO:1902653 BP secondary alcohol biosynthetic process 4/1105 67/162410.677099679  
 0.909465032 0.728718017 APOE/APOA1/APOA4/APOA5 4  
 GO:2000573 BP positive regulation of DNA biosynthetic process 4/1105 67/16241  
 0.677099679 0.909465032 0.728718017 FGF2/GREM1/PDGFRB/SMOC2 4  
 GO:1902532 BP negative regulation of intracellular signal transduction 31/1105 488/16241  
 0.682346578 0.914225762 0.7325326  
 ADIPOQ/APOE/CASQ2/CD22/CXCL12/DACT1/EMILIN1/FBLN1/HEG1/MYOC/MYOZ2/PDE3A/  
 PHLDA3/PTPRC/RGS4/SFRP1/SFRP2/SLIT2/THBS1/TIMP2/TIMP3/UCHL1/AMBP/BMP7/EPO/KLHL  
 31/MAGEA3/NEUROD1/PDZD3/TRIM40/XDH 31  
 GO:0002367 BP cytokine production involved in immune response 6/1105 100/16241  
 0.682865124 0.914225762 0.7325326 CCR2/CLC/IL12B/TGFB3/APOA1/APOA26  
 GO:0046632 BP alpha-beta T cell differentiation 6/1105 100/16241 0.682865124  
 0.914225762 0.7325326 CCL19/GLI3/IL12B/PLA2G2D/TNFSF8/IHH 6  
 GO:0010742 BP macrophage derived foam cell differentiation 2/1105 34/16241  
 0.683063629 0.914225762 0.7325326 ADIPOQ/AGTR1 2  
 GO:0030224 BP monocyte differentiation 2/1105 34/162410.683063629 0.914225762  
 0.7325326 CSF1R/IL31RA 2  
 GO:0032801 BP receptor catabolic process 2/1105 34/162410.683063629 0.914225762  
 0.7325326 APOE/PCSK9 2  
 GO:0034142 BP toll-like receptor 4 signaling pathway 2/1105 34/162410.683063629  
 0.914225762 0.7325326 ITGB2/S100A14 2  
 GO:0034405 BP response to fluid shear stress 2/1105 34/162410.683063629 0.914225762  
 0.7325326 PDGFRB/TGFB3 2  
 GO:0045622 BP regulation of T-helper cell differentiation 2/1105 34/162410.683063629  
 0.914225762 0.7325326 CCL19/IL12B 2  
 GO:0051693 BP actin filament capping 2/1105 34/162410.683063629 0.914225762  
 0.7325326 ADD2/LMOD1 2  
 GO:0090077 BP foam cell differentiation 2/1105 34/162410.683063629 0.914225762  
 0.7325326 ADIPOQ/AGTR1 2  
 GO:1903131 BP mononuclear cell differentiation 2/1105 34/162410.683063629  
 0.914225762 0.7325326 CSF1R/IL31RA 2

GO:1905332 BP positive regulation of morphogenesis of an epithelium 2/1105 34/16241  
 0.683063629 0.914225762 0.7325326 AGTR2/AR 2  
 GO:0000186 BP activation of MAPKK activity 3/1105 51/16241 0.683675294 0.914546037  
 0.732789223 CARTPT/NGF/NRK 3  
 GO:0046580 BP negative regulation of Ras protein signal transduction 3/1105 51/16241  
 0.683675294 0.914546037 0.732789223 HEG1/MYOC/TIMP2 3  
 GO:0051781 BP positive regulation of cell division 5/1105 84/16241 0.684524806  
 0.915433119 0.733500007 FGF2/FGF5/FGF7/TGFB3/THBS4 5  
 GO:0002244 BP hematopoietic progenitor cell differentiation 10/1105 164/16241  
 0.685603182 0.916625702 0.734455576  
 BVES/CSF1R/FLT3/JAM3/LMO1/PDGFRB/PLD4/PTPRC/SFRP1/TNFRSF13B 10  
 GO:0010952 BP positive regulation of peptidase activity 11/1105 180/16241 0.687340592  
 0.918448582 0.735916177  
 ANTXR1/COL4A3/CR1/FBLN1/FN1/NGF/NGFR/SFRP2/KHDC1L/SEMG1/XDH 11  
 GO:1903708 BP positive regulation of hemopoiesis 11/1105 180/16241 0.687340592  
 0.918448582 0.735916177  
 AXL/CCL19/GLI2/GLI3/IL12B/LILRB4/PTPRC/ROR2/TRIM58/IHH/IL17A 11  
 GO:0001895 BP retina homeostasis 4/1105 68/16241 0.688412912 0.919381246  
 0.736663483 KRT1/TUB/ADGRV1/USH1G 4  
 GO:0043242 BP negative regulation of protein complex disassembly 4/1105 68/16241  
 0.688412912 0.919381246 0.736663483 ADD2/LMOD1/NAV3/STMN2 4  
 GO:0008154 BP actin polymerization or depolymerization 12/1105 196/16241  
 0.689269787 0.9202754 0.737379933  
 ACTN2/ADD2/CCL21/CCR7/CXCL12/ELN/FMN2/GAS7/LMOD1/MAGEL2/SLIT2/WIPF1 12  
 GO:0001890 BP placenta development 9/1105 149/16241 0.691809923 0.922519034  
 0.739177667 DCN/NRK/PTGIS/RSP03/ASCL2/BMP7/CDX2/DLX3/PLAC1 9  
 GO:0002377 BP immunoglobulin production 6/1105 101/16241 0.692135493  
 0.922519034 0.739177667 CD22/FCGR2B/FGL2/GAPT/PTPRC/TLR96  
 GO:1901606 BP alpha-amino acid catabolic process 6/1105 101/16241 0.692135493  
 0.922519034 0.739177667 CDO1/IDO2/AGXT/AGXT2/OTC/PAH 6  
 GO:0061097 BP regulation of protein tyrosine kinase activity 5/1105 85/16241 0.694569269  
 0.922519034 0.739177667 CSF1R/NTRK2/PTPRC/RELN/THY1 5  
 GO:0002381 BP immunoglobulin production involved in immunoglobulin mediated immune  
 response 3/1105 52/16241 0.696404895 0.922519034 0.739177667 FGL2/GAPT/PTPRC 3  
 GO:0007632 BP visual behavior 3/1105 52/16241 0.696404895 0.922519034  
 0.739177667 ATP1A2/NETO1/PPP1R1B 3  
 GO:0003198 BP epithelial to mesenchymal transition involved in endocardial cushion  
 formation 1/1105 17/16241 0.698347929 0.922519034 0.739177667 HEYL 1  
 GO:0006044 BP N-acetylglucosamine metabolic process 1/1105 17/16241 0.698347929  
 0.922519034 0.739177667 CHST5 1  
 GO:0006825 BP copper ion transport 1/1105 17/16241 0.698347929 0.922519034  
 0.739177667 HEPHL1 1  
 GO:0007213 BP G protein-coupled acetylcholine receptor signaling pathway 1/1105  
 17/16241 0.698347929 0.922519034 0.739177667 CHRM2 1

GO:0008272 BP sulfate transport 1/1105 17/162410.698347929 0.922519034  
0.739177667 SLC26A3 1

GO:0009084 BP glutamine family amino acid biosynthetic process 1/1105 17/16241  
0.698347929 0.922519034 0.739177667 OTC 1

GO:0015693 BP magnesium ion transport 1/1105 17/162410.698347929 0.922519034  
0.739177667 NIPAL4 1

GO:0033262 BP regulation of nuclear cell cycle DNA replication 1/1105 17/16241  
0.698347929 0.922519034 0.739177667 FGFR1 1

GO:0036035 BP osteoclast development 1/1105 17/162410.698347929 0.922519034  
0.739177667 FBN1 1

GO:0042753 BP positive regulation of circadian rhythm 1/1105 17/162410.698347929  
0.922519034 0.739177667 NLGN1 1

GO:0043373 BP CD4-positive, alpha-beta T cell lineage commitment 1/1105 17/16241  
0.698347929 0.922519034 0.739177667 IL12B 1

GO:0045026 BP plasma membrane fusion 1/1105 17/162410.698347929 0.922519034  
0.739177667 FOLR2 1

GO:0046500 BP S-adenosylmethionine metabolic process 1/1105 17/162410.698347929  
0.922519034 0.739177667 BHMT2 1

GO:0048521 BP negative regulation of behavior 1/1105 17/162410.698347929  
0.922519034 0.739177667 RETN 1

GO:0051782 BP negative regulation of cell division 1/1105 17/162410.698347929  
0.922519034 0.739177667 C10orf99 1

GO:0055070 BP copper ion homeostasis 1/1105 17/162410.698347929 0.922519034  
0.739177667 PRND 1

GO:0061318 BP renal filtration cell differentiation 1/1105 17/162410.698347929  
0.922519034 0.739177667 ADIPOQ 1

GO:0070242 BP thymocyte apoptotic process 1/1105 17/162410.698347929 0.922519034  
0.739177667 GLI3 1

GO:0072112 BP glomerular visceral epithelial cell differentiation 1/1105 17/16241  
0.698347929 0.922519034 0.739177667 ADIPOQ 1

GO:0072673 BP lamellipodium morphogenesis 1/1105 17/162410.698347929  
0.922519034 0.739177667 PLEKHO1 1

GO:0090195 BP chemokine secretion 1/1105 17/162410.698347929 0.922519034  
0.739177667 CSF1R 1

GO:1900016 BP negative regulation of cytokine production involved in inflammatory response  
1/1105 17/162410.698347929 0.922519034 0.739177667 F2 1

GO:1900424 BP regulation of defense response to bacterium 1/1105 17/16241  
0.698347929 0.922519034 0.739177667 SYT11 1

GO:2000010 BP positive regulation of protein localization to cell surface 1/1105  
17/162410.698347929 0.922519034 0.739177667 MAP1A 1

GO:2000193 BP positive regulation of fatty acid transport 1/1105 17/162410.698347929  
0.922519034 0.739177667 CYP4F2 1

GO:2000269 BP regulation of fibroblast apoptotic process 1/1105 17/162410.698347929  
0.922519034 0.739177667 SFRP1 1

GO:2000319 BP regulation of T-helper 17 cell differentiation 1/1105 17/162410.698347929  
0.922519034 0.739177667 IL12B 1

GO:2000811 BP negative regulation of anoikis 1/1105 17/162410.698347929 0.922519034  
0.739177667 NTRK2 1

GO:0003203 BP endocardial cushion morphogenesis 2/1105 35/162410.698462599  
0.922519034 0.739177667 HEYL/BMP7 2

GO:0006699 BP bile acid biosynthetic process 2/1105 35/162410.698462599 0.922519034  
0.739177667 CYP7B1/AKR1C4 2

GO:0032733 BP positive regulation of interleukin-10 production 2/1105 35/16241  
0.698462599 0.922519034 0.739177667 IL12B/TLR9 2

GO:0051294 BP establishment of spindle orientation 2/1105 35/162410.698462599  
0.922519034 0.739177667 FGF10/ACTL8 2

GO:0071392 BP cellular response to estradiol stimulus 2/1105 35/162410.698462599  
0.922519034 0.739177667 SFRP1/UGT1A1 2

GO:2000516 BP positive regulation of CD4-positive, alpha-beta T cell activation 2/1105  
35/162410.698462599 0.922519034 0.739177667 CCL19/IL12B 2

GO:0002312 BP B cell activation involved in immune response 4/1105 69/16241  
0.699442584 0.923068772 0.739618151 FCGR2B/GAPT/PTPRC/CDH17 4

GO:0005977 BP glycogen metabolic process 4/1105 69/162410.699442584 0.923068772  
0.739618151 IGF1/PYGM/SORBS1/G6PC 4

GO:0033692 BP cellular polysaccharide biosynthetic process 4/1105 69/162410.699442584  
0.923068772 0.739618151 EXTL1/HAS1/IGF1/SORBS1 4

GO:0009755 BP hormone-mediated signaling pathway 14/1105 229/16241 0.699650341  
0.923094943 0.739639121  
AR/CYP7B1/HEYL/RORB/RXRG/SFRP1/TGFB11/BMP7/DEFA1/FOXH1/NR1I2/NR2E1/REN/SC  
GB2A1 14

GO:0042594 BP response to starvation 11/1105 182/16241 0.701153186 0.924829337  
0.741028821  
ADCYAP1/CARTPT/FSTL1/MAP1LC3C/SFRP1/WNT9B/DAPL1/KRT20/PCK1/PCSK9/UGT1A1  
11

GO:0001892 BP embryonic placenta development 5/1105 86/162410.704392094  
0.928602782 0.744052332 NRK/RSPO3/ASCL2/BMP7/CDX2 5

GO:1902476 BP chloride transmembrane transport 5/1105 86/162410.704392094  
0.928602782 0.744052332 GABRA5/SLC12A3/CLCA4/GABRA4/SLC26A3 5

GO:0008064 BP regulation of actin polymerization or depolymerization 10/1105  
167/16241 0.707157899 0.931757293 0.746579916  
ACTN2/ADD2/CCL21/CCR7/CXCL12/ELN/FMN2/LMOD1/MAGEL2/SLIT2 10

GO:0032535 BP regulation of cellular component size 22/1105 355/16241 0.70716433  
0.931757293 0.746579916  
ACTN2/ADD2/AKT3/APOE/CCL21/CCR7/CXCL12/ELN/EPHA7/FMN2/FN1/KCNMA1/LMOD1/  
MAG/MAGEL2/NEFL/NGF/PLXNA4/PTPRS/SLC12A3/SLIT2/TNR 22

GO:0046890 BP regulation of lipid biosynthetic process 11/1105 183/16241 0.707916469  
0.932336149 0.74704373  
ADIPOQ/APOE/DHH/HTR2A/SORBS1/APOA1/APOA4/APOA5/APOC3/HTR2C/MLXIPL 11

GO:0006576 BP cellular biogenic amine metabolic process 3/1105 53/162410.708742504  
0.932336149 0.74704373 IDO2/MOXD1/DDC 3

GO:0030837 BP negative regulation of actin filament polymerization 3/1105 53/16241  
0.708742504 0.932336149 0.74704373 ADD2/LMOD1/SLIT2 3

GO:0032613 BP interleukin-10 production 3/1105 53/162410.708742504 0.932336149  
0.74704373 FCGR2B/IL12B/TLR9 3

GO:0035036 BP sperm-egg recognition 3/1105 53/162410.708742504 0.932336149  
0.74704373 ADAM21/FOLR2/TEX1013

GO:0061098 BP positive regulation of protein tyrosine kinase activity 3/1105 53/16241  
0.708742504 0.932336149 0.74704373 CSF1R/NTRK2/RELN 3

GO:0006073 BP cellular glucan metabolic process 4/1105 70/162410.710188565  
0.933439893 0.747928116 IGF1/PYGM/SORBS1/G6PC 4

GO:0044042 BP glucan metabolic process 4/1105 70/162410.710188565 0.933439893  
0.747928116 IGF1/PYGM/SORBS1/G6PC 4

GO:0045637 BP regulation of myeloid cell differentiation 13/1105 215/16241  
0.710265833 0.933439893 0.747928116  
ADIPOQ/C1QC/CARTPT/FBN1/IL12B/LILRB4/MYL9/PRKCB/ROR2/SFRP1/THBS1/TRIM58/IL17  
A 13

GO:0042180 BP cellular ketone metabolic process 14/1105 231/16241 0.711728038  
0.933439893 0.747928116  
ADIPOQ/ATCAY/CNR1/IDO2/AKR1B10/AKR1C4/APOA4/APOA5/APOC3/CYP2B6/CYP4F2/FAB  
P1/MLXIPL/UGT1A8 14

GO:0006040 BP amino sugar metabolic process 2/1105 36/162410.713235581  
0.933439893 0.747928116 GFPT2/CHST5 2

GO:0032008 BP positive regulation of TOR signaling 2/1105 36/162410.713235581  
0.933439893 0.747928116 AKT3/RELN 2

GO:0032885 BP regulation of polysaccharide biosynthetic process 2/1105 36/16241  
0.713235581 0.933439893 0.747928116 IGF1/SORBS1 2

GO:0033572 BP transferrin transport 2/1105 36/162410.713235581 0.933439893  
0.747928116 ATP6V1C2/TFR2 2

GO:0071867 BP response to monoamine 2/1105 36/162410.713235581 0.933439893  
0.747928116 ADIPOQ/PENK2

GO:0071869 BP response to catecholamine 2/1105 36/162410.713235581 0.933439893  
0.747928116 ADIPOQ/PENK2

GO:0090313 BP regulation of protein targeting to membrane 2/1105 36/16241  
0.713235581 0.933439893 0.747928116 ITGB2/KCNB1 2

GO:0097352 BP autophagosome maturation 2/1105 36/162410.713235581 0.933439893  
0.747928116 LIX1/MAP1LC3C 2

GO:1901099 BP negative regulation of signal transduction in absence of ligand 2/1105  
36/162410.713235581 0.933439893 0.747928116 FGF10/TERT 2

GO:2001240 BP negative regulation of extrinsic apoptotic signaling pathway in absence of  
ligand 2/1105 36/162410.713235581 0.933439893 0.747928116 FGF10/TERT 2

GO:0006986 BP response to unfolded protein 10/1105 168/16241 0.714131042  
0.933439893 0.747928116

COMP/DNAJB5/EXTL1/HSPB2/HSPB3/HSPB7/HSPB8/THBS1/THBS4/CREB3L3 10  
GO:0030832 BP regulation of actin filament length 10/1105 168/16241 0.714131042  
0.933439893 0.747928116  
ACTN2/ADD2/CCL21/CCR7/CXCL12/ELN/FMN2/LMOD1/MAGEL2/SLIT2 10  
GO:0046488 BP phosphatidylinositol metabolic process 10/1105 168/16241 0.714131042  
0.933439893 0.747928116  
CSF1R/FGF2/HTR2A/PDGFRB/PI4K2B/PLA2G2D/HTR2C/PLA2G2F/PLA2G4E/PLA2G4F 10  
GO:0046631 BP alpha-beta T cell activation 8/1105 136/16241 0.714729333  
0.933439893 0.747928116 CCL19/CCR2/GLI3/IL12B/PLA2G2D/PTPRC/TNFSF8/IHH 8  
GO:0009063 BP cellular amino acid catabolic process 7/1105 120/16241 0.716180855  
0.933439893 0.747928116 CDO1/GADL1/IDO2/AGXT/AGXT2/OTC/PAH 7  
GO:0003094 BP glomerular filtration 1/1105 18/162410.718893142 0.933439893  
0.747928116 SULF1 1  
GO:0006349 BP regulation of gene expression by genetic imprinting 1/1105 18/16241  
0.718893142 0.933439893 0.747928116 CTCFL 1  
GO:0007221 BP positive regulation of transcription of Notch receptor target 1/1105  
18/162410.718893142 0.933439893 0.747928116 HEYL 1  
GO:0007289 BP spermatid nucleus differentiation 1/1105 18/162410.718893142  
0.933439893 0.747928116 SYCP3 1  
GO:0030809 BP negative regulation of nucleotide biosynthetic process 1/1105 18/16241  
0.718893142 0.933439893 0.747928116 PDZD3 1  
GO:0031293 BP membrane protein intracellular domain proteolysis 1/1105 18/16241  
0.718893142 0.933439893 0.747928116 NGFR 1  
GO:0032495 BP response to muramyl dipeptide 1/1105 18/162410.718893142  
0.933439893 0.747928116 VIM 1  
GO:0032682 BP negative regulation of chemokine production 1/1105 18/16241  
0.718893142 0.933439893 0.747928116 ELANE 1  
GO:0032930 BP positive regulation of superoxide anion generation 1/1105 18/16241  
0.718893142 0.933439893 0.747928116 ITGB2 1  
GO:0035994 BP response to muscle stretch 1/1105 18/162410.718893142 0.933439893  
0.747928116 SLC8A1 1  
GO:0045056 BP transcytosis 1/1105 18/162410.718893142 0.933439893 0.747928116  
GPIHBP1 1  
GO:0048339 BP paraxial mesoderm development 1/1105 18/162410.718893142  
0.933439893 0.747928116 FGFR1 1  
GO:0050908 BP detection of light stimulus involved in visual perception 1/1105  
18/162410.718893142 0.933439893 0.747928116 REEP6 1  
GO:0050962 BP detection of light stimulus involved in sensory perception 1/1105  
18/162410.718893142 0.933439893 0.747928116 REEP6 1  
GO:0051023 BP regulation of immunoglobulin secretion 1/1105 18/162410.718893142  
0.933439893 0.747928116 CD22 1  
GO:0051895 BP negative regulation of focal adhesion assembly 1/1105 18/16241  
0.718893142 0.933439893 0.747928116 THBS1 1  
GO:0051957 BP positive regulation of amino acid transport 1/1105 18/162410.718893142

0.933439893 0.747928116 SYT41  
 GO:0060749 BP mammary gland alveolus development 1/1105 18/162410.718893142  
 0.933439893 0.747928116 AR 1  
 GO:0061377 BP mammary gland lobule development 1/1105 18/162410.718893142  
 0.933439893 0.747928116 AR 1  
 GO:0071404 BP cellular response to low-density lipoprotein particle stimulus 1/1105  
 18/162410.718893142 0.933439893 0.747928116 ITGB2 1  
 GO:0072311 BP glomerular epithelial cell differentiation 1/1105 18/162410.718893142  
 0.933439893 0.747928116 ADIPOQ 1  
 GO:0072574 BP hepatocyte proliferation 1/1105 18/162410.718893142 0.933439893  
 0.747928116 LIMS2 1  
 GO:0072575 BP epithelial cell proliferation involved in liver morphogenesis 1/1105  
 18/162410.718893142 0.933439893 0.747928116 LIMS2 1  
 GO:0090190 BP positive regulation of branching involved in ureteric bud morphogenesis  
 1/1105 18/162410.718893142 0.933439893 0.747928116 AGTR2 1  
 GO:0090201 BP negative regulation of release of cytochrome c from mitochondria 1/1105  
 18/162410.718893142 0.933439893 0.747928116 IGF1 1  
 GO:0090330 BP regulation of platelet aggregation 1/1105 18/162410.718893142  
 0.933439893 0.747928116 FGG 1  
 GO:1900372 BP negative regulation of purine nucleotide biosynthetic process 1/1105  
 18/162410.718893142 0.933439893 0.747928116 PDZD3 1  
 GO:1902170 BP cellular response to reactive nitrogen species 1/1105 18/16241  
 0.718893142 0.933439893 0.747928116 MMP3 1  
 GO:1902236 BP negative regulation of endoplasmic reticulum stress-induced intrinsic  
 apoptotic signaling pathway 1/1105 18/162410.718893142 0.933439893 0.747928116  
 MAGEA3 1  
 GO:1902259 BP regulation of delayed rectifier potassium channel activity 1/1105  
 18/162410.718893142 0.933439893 0.747928116 KCNE4 1  
 GO:1900407 BP regulation of cellular response to oxidative stress 4/1105 71/16241  
 0.720651311 0.933799731 0.74821644 FBLN5/BMP7/MMP3/NOX1 4  
 GO:1901983 BP regulation of protein acetylation 4/1105 71/162410.720651311  
 0.933799731 0.74821644 MYOCD/NAP1L2/MAGEA2/MAGEA2B 4  
 GO:0002763 BP positive regulation of myeloid leukocyte differentiation 3/1105  
 54/162410.72069112 0.933799731 0.74821644 IL12B/ROR2/IL17A 3  
 GO:0010332 BP response to gamma radiation 3/1105 54/162410.72069112 0.933799731  
 0.74821644 CRYAB/PTPRC/APOBEC1 3  
 GO:0010803 BP regulation of tumor necrosis factor-mediated signaling pathway 3/1105  
 54/162410.72069112 0.933799731 0.74821644 ADIPOQ/CLIP3/APOA1 3  
 GO:0043525 BP positive regulation of neuron apoptotic process 3/1105 54/16241  
 0.72069112 0.933799731 0.74821644 EPHA7/GRIK5/PCSK9 3  
 GO:0048008 BP platelet-derived growth factor receptor signaling pathway 3/1105  
 54/162410.72069112 0.933799731 0.74821644 ADIPOQ/MYOCD/PDGFRB 3  
 GO:0048016 BP inositol phosphate-mediated signaling 3/1105 54/162410.72069112  
 0.933799731 0.74821644 IGF1/MYOZ2/CHP2 3

GO:0006778 BP porphyrin-containing compound metabolic process 2/1105 37/16241  
0.72739639 0.940255544 0.753389225 AMBP/UGT1A1 2

GO:0007339 BP binding of sperm to zona pellucida 2/1105 37/16241 0.72739639  
0.940255544 0.753389225 ADAM21/TEX101 2

GO:0008207 BP C21-steroid hormone metabolic process 2/1105 37/16241 0.72739639  
0.940255544 0.753389225 AKR1C4/HSD3B1 2

GO:0010907 BP positive regulation of glucose metabolic process 2/1105 37/16241  
0.72739639 0.940255544 0.753389225 IGF1/SORBS1 2

GO:0030201 BP heparan sulfate proteoglycan metabolic process 2/1105 37/16241  
0.72739639 0.940255544 0.753389225 EXTL1/SULF1 2

GO:0030835 BP negative regulation of actin filament depolymerization 2/1105  
37/16241 0.72739639 0.940255544 0.753389225 ADD2/LMOD1 2

GO:0046636 BP negative regulation of alpha-beta T cell activation 2/1105 37/16241  
0.72739639 0.940255544 0.753389225 GLI3/IHH 2

GO:1902229 BP regulation of intrinsic apoptotic signaling pathway in response to DNA  
damage 2/1105 37/16241 0.72739639 0.940255544 0.753389225 CXCL12/SFRP2 2

GO:1905898 BP positive regulation of response to endoplasmic reticulum stress 2/1105  
37/16241 0.72739639 0.940255544 0.753389225 FCGR2B/RNF183 2

GO:0016125 BP sterol metabolic process 9/1105 154/16241 0.728406623 0.94114053  
0.754098329 APOE/CYP1B1/CYP7B1/APOA1/APOA2/APOA4/APOA5/CEL/PCSK9 9

GO:2001234 BP negative regulation of apoptotic signaling pathway 13/1105 218/16241  
0.728464229 0.94114053 0.754098329  
AR/CXCL12/FGF10/IGF1/SERPINE1/SFRP2/THBS1/EPO/FGA/FGB/FGG/MAGEA3/TERT 13

GO:0008643 BP carbohydrate transport 8/1105 138/16241 0.729757738 0.942563767  
0.755238712 ADIPOQ/CLIP3/EDNRA/IGF1/PRKCB/SORBS1/SLC45A2/TERT 8

GO:0016126 BP sterol biosynthetic process 4/1105 72/16241 0.730831822 0.942959261  
0.755555606 APOE/APOA1/APOA4/APOA5 4

GO:0038034 BP signal transduction in absence of ligand 4/1105 72/16241 0.730831822  
0.942959261 0.755555606 FGF10/FGFR1/LCN2/TERT 4

GO:0045454 BP cell redox homeostasis 4/1105 72/16241 0.730831822 0.942959261  
0.755555606 CYBB/MPO/NME8/TXNDC2 4

GO:0097192 BP extrinsic apoptotic signaling pathway in absence of ligand 4/1105  
72/16241 0.730831822 0.942959261 0.755555606 FGF10/FGFR1/LCN2/TERT 4

GO:0002886 BP regulation of myeloid leukocyte mediated immunity 3/1105 55/16241  
0.732254557 0.943585 0.756056985 CCR2/FCGR2B/ITGB2 3

GO:0061077 BP chaperone-mediated protein folding 3/1105 55/16241 0.732254557  
0.943585 0.756056985 DNAJB5/HSPB6/UNC45B 3

GO:0030641 BP regulation of cellular pH 5/1105 89/16241 0.732526041 0.943585  
0.756056985 ATP1A4/ATP6V1C2/NOX1/SLC26A3/SLC9A2 5

GO:0048814 BP regulation of dendrite morphogenesis 5/1105 89/16241 0.732526041  
0.943585 0.756056985 ADGRB3/CHRNA3/NLGN1/RELN/NR2E1 5

GO:0043244 BP regulation of protein complex disassembly 6/1105 106/16241  
0.735751622 0.943585 0.756056985 ACTN2/ADD2/LMOD1/MAP1A/NAV3/STMN2 6

GO:0016054 BP organic acid catabolic process 16/1105 267/16241 0.736770823

0.943585 0.756056985  
ADIPOQ/CDO1/CNR1/FGF2/GADL1/IDO2/ADTRP/AGXT/AGXT2/CEL/CYP4F2/FABP1/OTC/PAH  
/PCK1/SULT2A1 16  
GO:0046395 BP carboxylic acid catabolic process 16/1105 267/16241 0.736770823  
0.943585 0.756056985  
ADIPOQ/CDO1/CNR1/FGF2/GADL1/IDO2/ADTRP/AGXT/AGXT2/CEL/CYP4F2/FABP1/OTC/PAH  
/PCK1/SULT2A1 16  
GO:0001696 BP gastric acid secretion 1/1105 19/162410.738040222 0.943585  
0.756056985 PTGER3 1  
GO:0001832 BP blastocyst growth 1/1105 19/162410.738040222 0.943585 0.756056985  
IGF1 1  
GO:0002363 BP alpha-beta T cell lineage commitment 1/1105 19/162410.738040222  
0.943585 0.756056985 IL12B 1  
GO:0003283 BP atrial septum development 1/1105 19/162410.738040222 0.943585  
0.756056985 ANK2 1  
GO:0006555 BP methionine metabolic process 1/1105 19/162410.738040222  
0.943585 0.756056985 BHMT2 1  
GO:0006833 BP water transport 1/1105 19/162410.738040222 0.943585 0.756056985  
PDZD3 1  
GO:0007130 BP synaptonemal complex assembly 1/1105 19/162410.738040222  
0.943585 0.756056985 MCMD2C1  
GO:0007625 BP grooming behavior 1/1105 19/162410.738040222 0.943585 0.756056985  
SLITRK5 1  
GO:0010042 BP response to manganese ion 1/1105 19/162410.738040222 0.943585  
0.756056985 SLC30A10 1  
GO:0015669 BP gas transport 1/1105 19/162410.738040222 0.943585 0.756056985  
NGB 1  
GO:0030220 BP platelet formation 1/1105 19/162410.738040222 0.943585 0.756056985  
CLEC1B 1  
GO:0032011 BP ARF protein signal transduction 1/1105 19/162410.738040222  
0.943585 0.756056985 PSD 1  
GO:0032012 BP regulation of ARF protein signal transduction 1/1105 19/16241  
0.738040222 0.943585 0.756056985 PSD 1  
GO:0033189 BP response to vitamin A 1/1105 19/162410.738040222 0.943585  
0.756056985 EPO 1  
GO:0033194 BP response to hydroperoxide 1/1105 19/162410.738040222 0.943585  
0.756056985 APOA4 1  
GO:0034138 BP toll-like receptor 3 signaling pathway 1/1105 19/162410.738040222  
0.943585 0.756056985 COLEC12 1  
GO:0042053 BP regulation of dopamine metabolic process 1/1105 19/162410.738040222  
0.943585 0.756056985 ITGB2 1  
GO:0042069 BP regulation of catecholamine metabolic process 1/1105 19/16241  
0.738040222 0.943585 0.756056985 ITGB2 1  
GO:0042789 BP mRNA transcription by RNA polymerase II 1/1105 19/162410.738040222

0.943585 0.756056985 FLNA 1  
 GO:0045063 BP T-helper 1 cell differentiation 1/1105 19/162410.738040222 0.943585  
 0.756056985 CCL19 1  
 GO:0045947 BP negative regulation of translational initiation 1/1105 19/16241  
 0.738040222 0.943585 0.756056985 C8orf88 1  
 GO:0046597 BP negative regulation of viral entry into host cell 1/1105 19/16241  
 0.738040222 0.943585 0.756056985 FCN1 1  
 GO:0060438 BP trachea development 1/1105 19/162410.738040222 0.943585  
 0.756056985 RSPO2 1  
 GO:0070102 BP interleukin-6-mediated signaling pathway 1/1105 19/162410.738040222  
 0.943585 0.756056985 C1QTNF4 1  
 GO:0072576 BP liver morphogenesis 1/1105 19/162410.738040222 0.943585  
 0.756056985 LIMS2 1  
 GO:0097205 BP renal filtration 1/1105 19/162410.738040222 0.943585 0.756056985  
 SULF1 1  
 GO:1902993 BP positive regulation of amyloid precursor protein catabolic process 1/1105  
 19/162410.738040222 0.943585 0.756056985 SPON1 1  
 GO:2000353 BP positive regulation of endothelial cell apoptotic process 1/1105  
 19/162410.738040222 0.943585 0.756056985 THBS1 1  
 GO:0043281 BP regulation of cysteine-type endopeptidase activity involved in apoptotic  
 process 12/1105 204/16241 0.740051549 0.945103824 0.757273958  
 COL4A3/CRYAB/EPHA7/NGF/NGFR/SFRP2/THBS1/WNT9A/FABP1/KHDC1L/MAGEA3/XDH  
 12  
 GO:0009583 BP detection of light stimulus 4/1105 73/162410.740731598 0.945103824  
 0.757273958 GPR88/GNGT1/REEP6/RGR 4  
 GO:0002639 BP positive regulation of immunoglobulin production 2/1105 38/16241  
 0.740959859 0.945103824 0.757273958 PTPRC/TLR9 2  
 GO:0007340 BP acrosome reaction 2/1105 38/162410.740959859 0.945103824  
 0.757273958 PRND/SYT6 2  
 GO:0015682 BP ferric iron transport 2/1105 38/162410.740959859 0.945103824  
 0.757273958 ATP6V1C2/TFR2 2  
 GO:0035315 BP hair cell differentiation 2/1105 38/162410.740959859 0.945103824  
 0.757273958 FGFR1/ATOH1 2  
 GO:0060416 BP response to growth hormone 2/1105 38/162410.740959859 0.945103824  
 0.757273958 GHR/IGFBP5 2  
 GO:0072512 BP trivalent inorganic cation transport 2/1105 38/162410.740959859  
 0.945103824 0.757273958 ATP6V1C2/TFR2 2  
 GO:2000008 BP regulation of protein localization to cell surface 2/1105 38/16241  
 0.740959859 0.945103824 0.757273958 ACTN2/MAP1A 2  
 GO:0030838 BP positive regulation of actin filament polymerization 5/1105 90/16241  
 0.741459507 0.945250221 0.75739126 CCL21/CCR7/FMN2/LMOD1/MAGEL2 5  
 GO:0032092 BP positive regulation of protein binding 5/1105 90/162410.741459507  
 0.945250221 0.75739126 ADD2/APOE/DACT1/SPON1/TERT 5  
 GO:0060997 BP dendritic spine morphogenesis 3/1105 56/162410.743437363

0.947525772 0.759214568 NLGN1/RELN/SHANK1 3  
 GO:0000041 BP transition metal ion transport 6/1105 107/16241 0.743924373  
 0.947900525 0.759514843 ABCC2/ATP2C2/ATP6V1C2/HEPHL1/SLC30A10/TFR2 6  
 GO:0008203 BP cholesterol metabolic process 8/1105 140/16241 0.744240372  
 0.948057238 0.75964041 APOE/CYP7B1/APOA1/APOA2/APOA4/APOA5/CEL/PCSK9 8  
 GO:1903046 BP meiotic cell cycle process 10/1105 173/16241 0.747376872  
 0.951805858 0.76264403  
 CCNA1/DAZL/FMN2/HFM1/MEIKIN/PDE3A/PTTG2/MCMDC2/OVOL1/SYCP3 10  
 GO:0140013 BP meiotic nuclear division 9/1105 157/16241 0.748920462 0.953524446  
 0.764021066 CCNA1/DAZL/FMN2/HFM1/MEIKIN/PDE3A/PTTG2/MCMDC2/SYCP3 9  
 GO:0032507 BP maintenance of protein location in cell 4/1105 74/16241 0.750352609  
 0.95373834 0.764192451 GRIK5/SHANK1/SYNE1/SUN3 4  
 GO:0046173 BP polyol biosynthetic process 4/1105 74/16241 0.750352609 0.95373834  
 0.764192451 ADCYAP1R1/FGF2/CYP3A4/PCK1 4  
 GO:0009267 BP cellular response to starvation 8/1105 141/16241 0.751276396  
 0.95373834 0.764192451  
 CARTPT/MAP1LC3C/SFRP1/WNT9B/DAPL1/KRT20/PCK1/PCSK9 8  
 GO:0005976 BP polysaccharide metabolic process 6/1105 108/16241 0.751913757  
 0.95373834 0.764192451 EXTL1/HAS1/IGF1/PYGM/SORBS1/G6PC 6  
 GO:0051817 BP modification of morphology or physiology of other organism involved in  
 symbiotic interaction 6/1105 108/16241 0.751913757 0.95373834 0.764192451  
 APOE/CSF1R/CTSG/ELANE/DEFA1/F2 6  
 GO:1990778 BP protein localization to cell periphery 18/1105 302/16241 0.753836101  
 0.95373834 0.764192451  
 ACTN2/ADIPOQ/ANK2/AR/CDH2/CLIP3/DPP6/EHD2/EPHA3/FLNA/KCNB1/NFASC/RAB31/SO  
 RBS1/STAC/TUB/ATP2C2/GPR158 18  
 GO:0010677 BP negative regulation of cellular carbohydrate metabolic process 2/1105  
 39/16241 0.753941636 0.95373834 0.764192451 ADIPOQ/FOXA2 2  
 GO:0072595 BP maintenance of protein localization in organelle 2/1105 39/16241  
 0.753941636 0.95373834 0.764192451 GRIK5/SYNE1 2  
 GO:0097178 BP ruffle assembly 2/1105 39/16241 0.753941636 0.95373834  
 0.764192451 NLGN1/P2RY12 2  
 GO:0010676 BP positive regulation of cellular carbohydrate metabolic process 3/1105  
 57/16241 0.754244734 0.95373834 0.764192451 ADCYAP1R1/IGF1/SORBS1 3  
 GO:0098930 BP axonal transport 3/1105 57/16241 0.754244734 0.95373834  
 0.764192451 MAP1A/NEFL/Uchl1 3  
 GO:0120193 BP tight junction organization 3/1105 57/16241 0.754244734 0.95373834  
 0.764192451 PECAM1/TGFB3/CLDN9 3  
 GO:0002089 BP lens morphogenesis in camera-type eye 1/1105 20/16241 0.755884234  
 0.95373834 0.764192451 SIX3 1  
 GO:0002320 BP lymphoid progenitor cell differentiation 1/1105 20/16241 0.755884234  
 0.95373834 0.764192451 FLT3 1  
 GO:0006907 BP pinocytosis 1/1105 20/16241 0.755884234 0.95373834 0.764192451  
 AXL 1

GO:0008356 BP asymmetric cell division 1/1105 20/162410.755884234 0.95373834  
 0.764192451 WNT9B 1  
 GO:0035268 BP protein mannosylation 1/1105 20/162410.755884234 0.95373834  
 0.764192451 TMTC1 1  
 GO:0035455 BP response to interferon-alpha 1/1105 20/162410.755884234 0.95373834  
 0.764192451 AXL 1  
 GO:0036065 BP fucosylation 1/1105 20/162410.755884234 0.95373834 0.764192451  
 FUT3 1  
 GO:0036344 BP platelet morphogenesis 1/1105 20/162410.755884234 0.95373834  
 0.764192451 CLEC1B 1  
 GO:0042402 BP cellular biogenic amine catabolic process 1/1105 20/162410.755884234  
 0.95373834 0.764192451 IDO2 1  
 GO:0043369 BP CD4-positive or CD8-positive, alpha-beta T cell lineage commitment 1/1105  
 20/162410.755884234 0.95373834 0.764192451 IL12B 1  
 GO:0044346 BP fibroblast apoptotic process 1/1105 20/162410.755884234 0.95373834  
 0.764192451 SFRP1 1  
 GO:0046426 BP negative regulation of JAK-STAT cascade 1/1105 20/162410.755884234  
 0.95373834 0.764192451 NEUROD1 1  
 GO:0046628 BP positive regulation of insulin receptor signaling pathway 1/1105  
 20/162410.755884234 0.95373834 0.764192451 SORBS1 1  
 GO:0051797 BP regulation of hair follicle development 1/1105 20/162410.755884234  
 0.95373834 0.764192451 FOXN1 1  
 GO:0060008 BP Sertoli cell differentiation 1/1105 20/162410.755884234 0.95373834  
 0.764192451 FLNA 1  
 GO:0060216 BP definitive hemopoiesis 1/1105 20/162410.755884234 0.95373834  
 0.764192451 MFAP5 1  
 GO:0061003 BP positive regulation of dendritic spine morphogenesis 1/1105 20/16241  
 0.755884234 0.95373834 0.764192451 RELN 1  
 GO:0070920 BP regulation of production of small RNA involved in gene silencing by RNA  
 1/1105 20/162410.755884234 0.95373834 0.764192451 TERT1  
 GO:0071359 BP cellular response to dsRNA 1/1105 20/162410.755884234 0.95373834  
 0.764192451 COLEC12 1  
 GO:0072234 BP metanephric nephron tubule development 1/1105 20/162410.755884234  
 0.95373834 0.764192451 WWTR1 1  
 GO:0072643 BP interferon-gamma secretion 1/1105 20/162410.755884234 0.95373834  
 0.764192451 IL36RN 1  
 GO:2000316 BP regulation of T-helper 17 type immune response 1/1105 20/16241  
 0.755884234 0.95373834 0.764192451 IL12B 1  
 GO:2000737 BP negative regulation of stem cell differentiation 1/1105 20/16241  
 0.755884234 0.95373834 0.764192451 PRICKLE1 1  
 GO:1901605 BP alpha-amino acid metabolic process 12/1105 207/16241 0.757610562  
 0.955671053 0.765741057  
 ART4/ATCAY/BHMT2/CDO1/GFPT2/IDO2/AGXT/AGXT2/GLYATL1/IYD/OTC/PAH 12  
 GO:0051651 BP maintenance of location in cell 5/1105 92/162410.758663872

0.956508454 0.766412033 APOE/GRIK5/SHANK1/SYNE1/SUN3 5  
 GO:1901570 BP fatty acid derivative biosynthetic process 5/1105 92/162410.758663872  
 0.956508454 0.766412033 GGT5/PTGDS/PTGIS/GGT6/PLA2G4F 5  
 GO:0055072 BP iron ion homeostasis 4/1105 75/162410.75969725 0.9571034  
 0.766888739 CYBRD1/HEPHL1/LCN2/TFR2 4  
 GO:0098661 BP inorganic anion transmembrane transport 6/1105 109/16241  
 0.759720308 0.9571034 0.766888739  
 ADAMTS8/GABRA5/SLC12A3/CLCA4/GABRA4/SLC26A3 6  
 GO:1903828 BP negative regulation of cellular protein localization 6/1105 109/16241  
 0.759720308 0.9571034 0.766888739 ACTN2/ADIPOQ/DCLK1/LILRB4/MAP1A/TRIM40  
 6  
 GO:0001959 BP regulation of cytokine-mediated signaling pathway 9/1105 159/16241  
 0.761988617 0.959714895 0.768981226  
 ADIPOQ/AXL/C1QTNF4/CLIP3/PTPRC/SLIT2/SLIT3/APOA1/IL36RN 9  
 GO:0001701 BP in utero embryonic development 22/1105 367/16241 0.762365507  
 0.959943442 0.769164352  
 AR/CMTM3/EDNRA/FGFR1/FOXO3/GLI2/GLI3/HAND2/HEG1/IGF1/NRK/RSPO3/SOX10/ST8SI  
 A6/TGFB3/WNT9B/ZFPM2/ASCL2/BMP7/CDX2/EMX1/IHH 22  
 GO:0006644 BP phospholipid metabolic process 24/1105 399/16241 0.764671662  
 0.961628308 0.770514367  
 CCL19/CCL21/CCR7/CHAT/CSF1R/FGF2/FLT3/HTR2A/P2RY12/PCYT1B/PDGFRB/PI4K2B/PLA2  
 G2D/ALPI/APOA1/APOA2/APOA4/APOA5/HTR2C/PCSK9/PLA2G12B/PLA2G2F/PLA2G4E/PLA2G4F  
 24  
 GO:0006879 BP cellular iron ion homeostasis 3/1105 58/162410.764682445 0.961628308  
 0.770514367 CYBRD1/LCN2/TFR2 3  
 GO:0007602 BP phototransduction 3/1105 58/162410.764682445 0.961628308  
 0.770514367 GPR88/GNGT1/RGR 3  
 GO:0042982 BP amyloid precursor protein metabolic process 3/1105 58/16241  
 0.764682445 0.961628308 0.770514367 APOE/IGF1/SPON1 3  
 GO:0070059 BP intrinsic apoptotic signaling pathway in response to endoplasmic reticulum  
 stress 3/1105 58/162410.764682445 0.961628308 0.770514367  
 MAGEA3/RNF183/RNF186 3  
 GO:0051262 BP protein tetramerization 8/1105 143/16241 0.764937886 0.961703326  
 0.770574477 ACTN2/DPYS/KRT1/MS4A1/NLGN1/SYT11/REG1A/TGM3 8  
 GO:0002285 BP lymphocyte activation involved in immune response 10/1105 176/16241  
 0.766014779 0.962011381 0.770821309  
 CCL19/CD1C/FCGR2B/FGL2/GAPT/IL12B/PTPRC/CDH17/PGLYRP3/PGLYRP4 10  
 GO:0021762 BP substantia nigra development 2/1105 40/162410.766358008  
 0.962011381 0.770821309 GNB4/PLP1 2  
 GO:0061028 BP establishment of endothelial barrier 2/1105 40/162410.766358008  
 0.962011381 0.770821309 PTPRS/S1PR3 2  
 GO:0071470 BP cellular response to osmotic stress 2/1105 40/162410.766358008  
 0.962011381 0.770821309 MYLK/EPO 2  
 GO:0072583 BP clathrin-dependent endocytosis 2/1105 40/162410.766358008

0.962011381 0.770821309 SNAP91/SYT11 2  
 GO:1902743 BP regulation of lamellipodium organization 2/1105 40/162410.766358008  
 0.962011381 0.770821309 SLIT2/HRG 2  
 GO:1903076 BP regulation of protein localization to plasma membrane 5/1105  
 93/162410.766937258 0.962059317 0.770859718 AR/CLIP3/EPHA3/SORBS1/STAC 5  
 GO:0051100 BP negative regulation of binding 9/1105 160/16241 0.768340289  
 0.962059317 0.770859718  
 ADIPOQ/CFHR1/CRTAC1/DACT1/DKK1/HAND2/PLN/CARD18/PCSK9 9  
 GO:0000271 BP polysaccharide biosynthetic process 4/1105 76/162410.768768308  
 0.962059317 0.770859718 EXTL1/HAS1/IGF1/SORBS1 4  
 GO:0097581 BP lamellipodium organization 4/1105 76/162410.768768308 0.962059317  
 0.770859718 P2RY12/PLEKHO1/SLIT2/HRG 4  
 GO:0043393 BP regulation of protein binding 12/1105 209/16241 0.768859706  
 0.962059317 0.770859718  
 ADD2/ADIPOQ/APOE/CFHR1/CRTAC1/DACT1/DKK1/GREM2/SPON1/CARD18/PCSK9/TERT  
 12  
 GO:0008277 BP regulation of G protein-coupled receptor signaling pathway 8/1105  
 144/16241 0.771563775 0.962059317 0.770859718  
 ADCYAP1/ALK/GRP/KCTD8/PHF24/RGS4/TUB/F2 8  
 GO:0051348 BP negative regulation of transferase activity 15/1105 258/16241  
 0.772312489 0.962059317 0.770859718  
 ADIPOQ/APOE/FABP4/HEG1/MYOC/PTPRC/RGS4/SFRP1/SFRP2/THY1/UCHL1/WWTR1/BM  
 P7/FOXA2/PPP1R1B 15  
 GO:0009310 BP amine catabolic process 1/1105 21/162410.772513783 0.962059317  
 0.770859718 IDO2 1  
 GO:0019883 BP antigen processing and presentation of endogenous antigen 1/1105  
 21/162410.772513783 0.962059317 0.770859718 CD1C 1  
 GO:0030728 BP ovulation 1/1105 21/162410.772513783 0.962059317 0.770859718  
 ADAMTS1 1  
 GO:0031579 BP membrane raft organization 1/1105 21/162410.772513783 0.962059317  
 0.770859718 PTPRC 1  
 GO:0032674 BP regulation of interleukin-5 production 1/1105 21/162410.772513783  
 0.962059317 0.770859718 SCGB1A1 1  
 GO:0032928 BP regulation of superoxide anion generation 1/1105 21/162410.772513783  
 0.962059317 0.770859718 ITGB2 1  
 GO:0035162 BP embryonic hemopoiesis 1/1105 21/162410.772513783 0.962059317  
 0.770859718 TPO 1  
 GO:0035357 BP peroxisome proliferator activated receptor signaling pathway 1/1105  
 21/162410.772513783 0.962059317 0.770859718 PTGIS 1  
 GO:0035561 BP regulation of chromatin binding 1/1105 21/162410.772513783  
 0.962059317 0.770859718 EBF21  
 GO:0035743 BP CD4-positive, alpha-beta T cell cytokine production 1/1105 21/16241  
 0.772513783 0.962059317 0.770859718 IL12B 1  
 GO:0035809 BP regulation of urine volume 1/1105 21/162410.772513783 0.962059317

0.770859718 NPR3 1  
 GO:0042135 BP neurotransmitter catabolic process 1/1105 21/162410.772513783  
 0.962059317 0.770859718 PRIMA1 1  
 GO:0045830 BP positive regulation of isotype switching 1/1105 21/162410.772513783  
 0.962059317 0.770859718 PTPRC 1  
 GO:0061213 BP positive regulation of mesonephros development 1/1105 21/16241  
 0.772513783 0.962059317 0.770859718 AGTR2 1  
 GO:0070199 BP establishment of protein localization to chromosome 1/1105 21/16241  
 0.772513783 0.962059317 0.770859718 TERT1  
 GO:0071425 BP hematopoietic stem cell proliferation 1/1105 21/162410.772513783  
 0.962059317 0.770859718 SFRP2 1  
 GO:0090140 BP regulation of mitochondrial fission 1/1105 21/162410.772513783  
 0.962059317 0.770859718 DCN 1  
 GO:0097320 BP plasma membrane tubulation 1/1105 21/162410.772513783  
 0.962059317 0.770859718 EHD2 1  
 GO:0140058 BP neuron projection arborization 1/1105 21/162410.772513783  
 0.962059317 0.770859718 NLGN1 1  
 GO:1902473 BP regulation of protein localization to synapse 1/1105 21/162410.772513783  
 0.962059317 0.770859718 NLGN1 1  
 GO:1903392 BP negative regulation of adherens junction organization 1/1105 21/16241  
 0.772513783 0.962059317 0.770859718 THBS1 1  
 GO:1904893 BP negative regulation of STAT cascade 1/1105 21/162410.772513783  
 0.962059317 0.770859718 NEUROD1 1  
 GO:0006486 BP protein glycosylation 14/1105 242/16241 0.772663682 0.962059317  
 0.770859718  
 EXTL1/GFPT2/GXYLT2/MGAT5B/ST6GAL2/ST6GALNAC5/ST8SIA2/ST8SIA6/TMTC1/FUT3/MU  
 C15/MUC17/MUC21/MUC4 14  
 GO:0043413 BP macromolecule glycosylation 14/1105 242/16241 0.772663682  
 0.962059317 0.770859718  
 EXTL1/GFPT2/GXYLT2/MGAT5B/ST6GAL2/ST6GALNAC5/ST8SIA2/ST8SIA6/TMTC1/FUT3/MU  
 C15/MUC17/MUC21/MUC4 14  
 GO:0045017 BP glycerolipid biosynthetic process 14/1105 242/16241 0.772663682  
 0.962059317 0.770859718  
 CHAT/FGF2/HTR2A/PCYT1B/PI4K2B/PLA2G2D/ALPI/APOA1/APOA2/HTR2C/MOGAT2/MOGA  
 T3/PCK1/PLA2G2F 14  
 GO:0008333 BP endosome to lysosome transport 3/1105 59/162410.77475678  
 0.964176667 0.772556265 CACNG7/PCDHGA3/CDX2 3  
 GO:0030032 BP lamellipodium assembly 3/1105 59/162410.77475678 0.964176667  
 0.772556265 P2RY12/SLIT2/HRG 3  
 GO:0002433 BP immune response-regulating cell surface receptor signaling pathway involved  
 in phagocytosis 4/1105 77/162410.777568928 0.966696678 0.77457545  
 FCGR2B/FCGR3A/PTPRC/WIPF1 4  
 GO:0038096 BP Fc-gamma receptor signaling pathway involved in phagocytosis 4/1105  
 77/162410.777568928 0.966696678 0.77457545 FCGR2B/FCGR3A/PTPRC/WIPF1 4

GO:1901992 BP positive regulation of mitotic cell cycle phase transition 4/1105  
77/162410.777568928 0.966696678 0.77457545 ADAMTS1/FGF10/KCNA5/TERT 4

GO:1903313 BP positive regulation of mRNA metabolic process 4/1105 77/16241  
0.777568928 0.966696678 0.77457545 CPEB1/RBM24/APOBEC1/TRIM71 4

GO:0032881 BP regulation of polysaccharide metabolic process 2/1105 41/16241  
0.778225739 0.967268429 0.775033571 IGF1/SORBS1 2

GO:0051302 BP regulation of cell division 9/1105 162/16241 0.780679777  
0.970073125 0.777280862  
FGF2/FGF5/FGF7/NAP1L2/SFRP2/TGFB3/THBS4/WNT9B/C10orf99 9

GO:0007249 BP I-kappaB kinase/NF-kappaB signaling 15/1105 260/16241 0.78208682  
0.970346522 0.777499924  
ADIPOQ/CCL19/CCL21/CCR7/CLEC6A/FLNA/LURAP1/PRKCB/TIFAB/TLR7/TLR8/TLR9/IL36G/IL36RN/IL37 15

GO:2000116 BP regulation of cysteine-type endopeptidase activity 13/1105 228/16241  
0.783688741 0.970346522 0.777499924  
COL4A3/CRYAB/EPHA7/NGF/NGFR/SFRP2/THBS1/WNT9A/CARD18/FABP1/KHDC1L/MAGEA3/XDH 13

GO:0045931 BP positive regulation of mitotic cell cycle 8/1105 146/16241 0.78440786  
0.970346522 0.777499924 ADAMTS1/FGF10/FGFR1/IGF1/KCNA5/PDGFRB/SMOC2/TERT 8

GO:0006826 BP iron ion transport 3/1105 60/162410.784474462 0.970346522  
0.777499924 ATP6V1C2/HEPHL1/TFR2 3

GO:0140029 BP exocytic process 4/1105 78/162410.786102579 0.970346522  
0.777499924 CAMK2A/GRIK5/KCNB1/NLGN1 4

GO:1902882 BP regulation of response to oxidative stress 4/1105 78/162410.786102579  
0.970346522 0.777499924 FBLN5/BMP7/MMP3/NOX1 4

GO:0009226 BP nucleotide-sugar biosynthetic process 1/1105 22/162410.788011457  
0.970346522 0.777499924 GFPT2 1

GO:0010226 BP response to lithium ion 1/1105 22/162410.788011457 0.970346522  
0.777499924 FABP4 1

GO:0010869 BP regulation of receptor biosynthetic process 1/1105 22/162410.788011457  
0.970346522 0.777499924 ADIPOQ 1

GO:0021516 BP dorsal spinal cord development 1/1105 22/162410.788011457  
0.970346522 0.777499924 LHX5 1

GO:0021854 BP hypothalamus development 1/1105 22/162410.788011457 0.970346522  
0.777499924 NRP2 1

GO:0030878 BP thyroid gland development 1/1105 22/162410.788011457 0.970346522  
0.777499924 FGF10 1

GO:0031629 BP synaptic vesicle fusion to presynaptic active zone membrane 1/1105  
22/162410.788011457 0.970346522 0.777499924 GRIK5 1

GO:0032366 BP intracellular sterol transport 1/1105 22/162410.788011457 0.970346522  
0.777499924 PCSK9 1

GO:0032367 BP intracellular cholesterol transport 1/1105 22/162410.788011457  
0.970346522 0.777499924 PCSK9 1

GO:0032634 BP interleukin-5 production 1/1105 22/162410.788011457 0.970346522  
 0.777499924 SCGB1A1 1  
 GO:0032656 BP regulation of interleukin-13 production 1/1105 22/162410.788011457  
 0.970346522 0.777499924 SCGB1A1 1  
 GO:0036037 BP CD8-positive, alpha-beta T cell activation 1/1105 22/162410.788011457  
 0.970346522 0.777499924 TNFSF8 1  
 GO:0042454 BP ribonucleoside catabolic process 1/1105 22/162410.788011457  
 0.970346522 0.777499924 APOBEC1 1  
 GO:0043032 BP positive regulation of macrophage activation 1/1105 22/16241  
 0.788011457 0.970346522 0.777499924 THBS1 1  
 GO:0043951 BP negative regulation of cAMP-mediated signaling 1/1105 22/16241  
 0.788011457 0.970346522 0.777499924 PDE3A 1  
 GO:0045117 BP azole transport 1/1105 22/162410.788011457 0.970346522  
 0.777499924 ADCYAP1 1  
 GO:0048305 BP immunoglobulin secretion 1/1105 22/162410.788011457 0.970346522  
 0.777499924 CD22 1  
 GO:0050687 BP negative regulation of defense response to virus 1/1105 22/16241  
 0.788011457 0.970346522 0.777499924 FGL2 1  
 GO:0051195 BP negative regulation of cofactor metabolic process 1/1105 22/16241  
 0.788011457 0.970346522 0.777499924 MMP3 1  
 GO:0051307 BP meiotic chromosome separation 1/1105 22/162410.788011457  
 0.970346522 0.777499924 HFM1 1  
 GO:0051457 BP maintenance of protein location in nucleus 1/1105 22/162410.788011457  
 0.970346522 0.777499924 SYNE1 1  
 GO:0051570 BP regulation of histone H3-K9 methylation 1/1105 22/162410.788011457  
 0.970346522 0.777499924 PRDM12 1  
 GO:0060487 BP lung epithelial cell differentiation 1/1105 22/162410.788011457  
 0.970346522 0.777499924 FGF10 1  
 GO:0070193 BP synaptonemal complex organization 1/1105 22/162410.788011457  
 0.970346522 0.777499924 MCMD2C1 1  
 GO:0071294 BP cellular response to zinc ion 1/1105 22/162410.788011457 0.970346522  
 0.777499924 KCNK3 1  
 GO:0099500 BP vesicle fusion to plasma membrane 1/1105 22/162410.788011457  
 0.970346522 0.777499924 GRIK5 1  
 GO:1900078 BP positive regulation of cellular response to insulin stimulus 1/1105  
 22/162410.788011457 0.970346522 0.777499924 SORBS1 1  
 GO:1901071 BP glucosamine-containing compound metabolic process 1/1105 22/16241  
 0.788011457 0.970346522 0.777499924 CHST5 1  
 GO:1901522 BP positive regulation of transcription from RNA polymerase II promoter  
 involved in cellular response to chemical stimulus 1/1105 22/162410.788011457  
 0.970346522 0.777499924 SMAD9 1  
 GO:1901798 BP positive regulation of signal transduction by p53 class mediator 1/1105  
 22/162410.788011457 0.970346522 0.777499924 HIC1 1  
 GO:0008631 BP intrinsic apoptotic signaling pathway in response to oxidative stress 2/1105

42/162410.789561931 0.97103861 0.778054466 CYP1B1/NOX1 2  
 GO:0030866 BP cortical actin cytoskeleton organization 2/1105 42/162410.789561931  
 0.97103861 0.778054466 EHD2/WIPF1 2  
 GO:0032480 BP negative regulation of type I interferon production 2/1105 42/16241  
 0.789561931 0.97103861 0.778054466 LILRA4/PTPRS 2  
 GO:0032958 BP inositol phosphate biosynthetic process 2/1105 42/162410.789561931  
 0.97103861 0.778054466 ADCYAP1R1/FGF2 2  
 GO:0061001 BP regulation of dendritic spine morphogenesis 2/1105 42/162410.789561931  
 0.97103861 0.778054466 NLGN1/RELN 2  
 GO:0010923 BP negative regulation of phosphatase activity 5/1105 96/162410.790462848  
 0.971903256 0.778747273 CCDC8/PPP1R14C/PPP1R14D/PPP1R1B/PPP1R275  
 GO:0046165 BP alcohol biosynthetic process 9/1105 164/16241 0.792536577  
 0.974209126 0.780594874  
 ADCYAP1R1/APOE/FGF2/MOXD1/APOA1/APOA4/APOA5/CYP3A4/PCK1 9  
 GO:0046686 BP response to cadmium ion 3/1105 61/162410.793842596 0.975570385  
 0.781685597 CYBB/SPARC/TERT 3  
 GO:0034599 BP cellular response to oxidative stress 16/1105 279/16241 0.795459445  
 0.977312855 0.783081768  
 AXL/CYBB/CYP1B1/FBLN5/MMP2/MPO/MSRB3/NME8/PENK/SOD3/APOA4/BMP7/FABP1/L  
 CN2/MMP3/NOX1 16  
 GO:0030099 BP myeloid cell differentiation 22/1105 376/16241 0.799027635  
 0.97904997 0.784473649  
 ADIPOQ/C1QC/CARTPT/CCL19/CCR7/CEBPE/CLEC1B/CSF1R/FBN1/IKZF1/IL12B/IL31RA/LILR  
 B4/MYL9/PRKCB/ROR2/SFRP1/THBS1/TRIM58/EFNA2/EPO/IL17A 22  
 GO:0006904 BP vesicle docking involved in exocytosis 2/1105 43/162410.800383901  
 0.97904997 0.784473649 CAMK2A/KCNB1 2  
 GO:0035196 BP production of miRNAs involved in gene silencing by miRNA 2/1105  
 43/162410.800383901 0.97904997 0.784473649 LIN28B/TRIM71 2  
 GO:0043628 BP ncRNA 3'-end processing 2/1105 43/162410.800383901 0.97904997  
 0.784473649 CT45A10/CT45A5 2  
 GO:0044275 BP cellular carbohydrate catabolic process 2/1105 43/162410.800383901  
 0.97904997 0.784473649 PYGM/G6PC 2  
 GO:0045773 BP positive regulation of axon extension 2/1105 43/162410.800383901  
 0.97904997 0.784473649 CXCL12/FN1 2  
 GO:0051898 BP negative regulation of protein kinase B signaling 2/1105 43/16241  
 0.800383901 0.97904997 0.784473649 PHLA3/XDH 2  
 GO:0045927 BP positive regulation of growth 14/1105 248/16241 0.801905069  
 0.97904997 0.784473649  
 CACNG7/CXCL12/FGF2/FGFR1/FN1/GHR/IGF1/NGF/SFRP1/SFRP2/SYT4/ZFPM2/F2/REG1A  
 14  
 GO:0038094 BP Fc-gamma receptor signaling pathway 4/1105 80/162410.802384291  
 0.97904997 0.784473649 FCGR2B/FCGR3A/PTPRC/WIPF1 4  
 GO:0002230 BP positive regulation of defense response to virus by host 1/1105  
 23/162410.80245423 0.97904997 0.784473649 IL12B 1

GO:0006346 BP methylation-dependent chromatin silencing 1/1105 23/162410.80245423  
0.97904997 0.784473649 APOBEC1 1

GO:0006359 BP regulation of transcription by RNA polymerase III 1/1105 23/16241  
0.80245423 0.97904997 0.784473649 AR 1

GO:0007617 BP mating behavior 1/1105 23/162410.80245423 0.97904997  
0.784473649 PPP1R1B 1

GO:0009067 BP aspartate family amino acid biosynthetic process 1/1105 23/16241  
0.80245423 0.97904997 0.784473649 BHMT2 1

GO:0010460 BP positive regulation of heart rate 1/1105 23/162410.80245423  
0.97904997 0.784473649 RGS4 1

GO:0010894 BP negative regulation of steroid biosynthetic process 1/1105 23/16241  
0.80245423 0.97904997 0.784473649 APOE 1

GO:0015813 BP L-glutamate transmembrane transport 1/1105 23/162410.80245423  
0.97904997 0.784473649 ATP1A2 1

GO:0016338 BP calcium-independent cell-cell adhesion via plasma membrane cell-adhesion  
molecules 1/1105 23/162410.80245423 0.97904997 0.784473649 CLDN9 1

GO:0034123 BP positive regulation of toll-like receptor signaling pathway 1/1105  
23/162410.80245423 0.97904997 0.784473649 TLR91

GO:0034629 BP cellular protein-containing complex localization 1/1105 23/16241  
0.80245423 0.97904997 0.784473649 SGCD 1

GO:0045408 BP regulation of interleukin-6 biosynthetic process 1/1105 23/16241  
0.80245423 0.97904997 0.784473649 IL17F 1

GO:0048143 BP astrocyte activation1/1105 23/162410.80245423 0.97904997  
0.784473649 C1QA 1

GO:0048714 BP positive regulation of oligodendrocyte differentiation 1/1105 23/16241  
0.80245423 0.97904997 0.784473649 TENM4 1

GO:0051560 BP mitochondrial calcium ion homeostasis 1/1105 23/162410.80245423  
0.97904997 0.784473649 ANXA6 1

GO:0060479 BP lung cell differentiation 1/1105 23/162410.80245423 0.97904997  
0.784473649 FGF10 1

GO:1901889 BP negative regulation of cell junction assembly 1/1105 23/16241  
0.80245423 0.97904997 0.784473649 THBS1 1

GO:2000209 BP regulation of anoikis 1/1105 23/162410.80245423 0.97904997  
0.784473649 NTRK2 1

GO:2000637 BP positive regulation of gene silencing by miRNA 1/1105 23/16241  
0.80245423 0.97904997 0.784473649 TRIM71 1

GO:0046824 BP positive regulation of nucleocytoplasmic transport 3/1105 62/16241  
0.802868613 0.979312299 0.784683843 FLNA/GLI3/CHP2 3

GO:0010921 BP regulation of phosphatase activity 9/1105 166/16241 0.803914942  
0.980345132 0.785511411  
AGTR2/CCDC8/PDGFRB/PTPRC/CHP2/PPP1R14C/PPP1R14D/PPP1R1B/PPP1R27 9

GO:0035304 BP regulation of protein dephosphorylation 7/1105 133/16241  
0.80833068 0.985485307 0.789630028  
AGTR2/PDGFRB/PTPRC/PPP1R14C/PPP1R14D/PPP1R1B/PPP1R27 7

GO:0072384 BP organelle transport along microtubule 4/1105 81/162410.810140636  
0.987446849 0.791201734 NEFL/TRIM58/UCLH1/ACTL8 4

GO:0006694 BP steroid biosynthetic process 10/1105 184/16241 0.81092002  
0.98815161 0.79176643  
APOE/CYP7B1/DHH/HSD11B1/AKR1C4/APOA1/APOA4/APOA5/CYP3A4/HSD3B1 10

GO:0051785 BP positive regulation of nuclear division 3/1105 63/162410.811560215  
0.988441304 0.79199855 DAZL/IGF1/PDGFRB3

GO:0051881 BP regulation of mitochondrial membrane potential 3/1105 63/16241  
0.811560215 0.988441304 0.79199855 DCN/MYOC/TCL1A 3

GO:0030833 BP regulation of actin filament polymerization 8/1105 151/16241  
0.814172205 0.988596157 0.792122628  
ADD2/CCL21/CCR7/ELN/FMN2/LMOD1/MAGEL2/SLIT2 8

GO:1904951 BP positive regulation of establishment of protein localization 26/1105  
444/16241 0.814711967 0.988596157 0.792122628  
AGTR2/AKAP12/BLK/C1QTNF4/CCL19/CLEC6A/CLEC9A/CRTAM/CSF1R/FCN1/FLNA/GLI3/IGF  
1/ITGB2/KCNB1/TGFB3/TLR8/CHP2/FGA/FGB/FGG/IL17A/IL17F/ORM1/ORM2/RFX6 26

GO:0010565 BP regulation of cellular ketone metabolic process 9/1105 168/16241  
0.814820497 0.988596157 0.792122628  
ADIPOQ/ATCAY/CNR1/APOA4/APOA5/APOC3/FABP1/MLXIPL/UGT1A8 9

GO:0050821 BP protein stabilization 9/1105 168/16241 0.814820497 0.988596157  
0.792122628 ANK2/CRYAB/FLNA/GPIHBP1/IGF1/A1CF/APOA1/APOA2/DSG1 9

GO:0003158 BP endothelium development 6/1105 117/16241 0.815721436  
0.988596157 0.792122628 COL4A4/HEG1/PECAM1/PTPRS/S1PR3/XDH 6

GO:0009110 BP vitamin biosynthetic process 1/1105 24/162410.815913848 0.988596157  
0.792122628 CYP3A4 1

GO:0010288 BP response to lead ion 1/1105 24/162410.815913848 0.988596157  
0.792122628 SPARC 1

GO:0031645 BP negative regulation of neurological system process 1/1105 24/16241  
0.815913848 0.988596157 0.792122628 CBLN1 1

GO:0031935 BP regulation of chromatin silencing 1/1105 24/162410.815913848  
0.988596157 0.792122628 APOBEC1 1

GO:0032528 BP microvillus organization 1/1105 24/162410.815913848 0.988596157  
0.792122628 MYO1A 1

GO:0032925 BP regulation of activin receptor signaling pathway 1/1105 24/16241  
0.815913848 0.988596157 0.792122628 FGF10 1

GO:0042226 BP interleukin-6 biosynthetic process 1/1105 24/162410.815913848  
0.988596157 0.792122628 IL17F 1

GO:0043302 BP positive regulation of leukocyte degranulation 1/1105 24/16241  
0.815913848 0.988596157 0.792122628 ITGB2 1

GO:0046697 BP decidualization 1/1105 24/162410.815913848 0.988596157  
0.792122628 PTGIS 1

GO:0048103 BP somatic stem cell division 1/1105 24/162410.815913848 0.988596157  
0.792122628 FGFR1 1

GO:0048643 BP positive regulation of skeletal muscle tissue development 1/1105

24/162410.815913848 0.988596157 0.792122628 RBM24 1  
 GO:0050427 BP 3'-phosphoadenosine 5'-phosphosulfate metabolic process 1/1105  
 24/162410.815913848 0.988596157 0.792122628 SULT2A1 1  
 GO:0051220 BP cytoplasmic sequestering of protein 1/1105 24/162410.815913848  
 0.988596157 0.792122628 FLNA 1  
 GO:0060148 BP positive regulation of posttranscriptional gene silencing 1/1105  
 24/162410.815913848 0.988596157 0.792122628 TRIM71 1  
 GO:0060396 BP growth hormone receptor signaling pathway 1/1105 24/16241  
 0.815913848 0.988596157 0.792122628 GHR 1  
 GO:0099590 BP neurotransmitter receptor internalization 1/1105 24/162410.815913848  
 0.988596157 0.792122628 CACNG7 1  
 GO:0030258 BP lipid modification 12/1105 219/16241 0.819640853 0.991285181  
 0.794277236  
 ADIPOQ/AGTR1/APOE/CNR1/PI4K2B/ADH7/APOA1/APOA2/APOA4/APOA5/CYP3A4/FABP1  
 12  
 GO:0006687 BP glycosphingolipid metabolic process 3/1105 64/162410.819925329  
 0.991285181 0.794277236 ST6GALNAC5/ST8SIA2/ST8SIA6 3  
 GO:0009247 BP glycolipid biosynthetic process 3/1105 64/162410.819925329  
 0.991285181 0.794277236 ST6GALNAC5/ST8SIA2/ST8SIA6 3  
 GO:0015807 BP L-amino acid transport 3/1105 64/162410.819925329 0.991285181  
 0.794277236 ATP1A2/RGS4/SLC6A17 3  
 GO:0048278 BP vesicle docking 3/1105 64/162410.819925329 0.991285181  
 0.794277236 BVES/CAMK2A/KCNB1 3  
 GO:0060759 BP regulation of response to cytokine stimulus 9/1105 169/16241  
 0.820098072 0.991285181 0.794277236  
 ADIPOQ/AXL/C1QTNF4/CLIP3/PTPRC/SLIT2/SLIT3/APOA1/IL36RN 9  
 GO:0002067 BP glandular epithelial cell differentiation 2/1105 45/162410.820554875  
 0.991285181 0.794277236 NEUROD1/RFX6 2  
 GO:0005978 BP glycogen biosynthetic process 2/1105 45/162410.820554875  
 0.991285181 0.794277236 IGF1/SORBS1 2  
 GO:0007595 BP lactation 2/1105 45/162410.820554875 0.991285181 0.794277236  
 CDO1/XDH 2  
 GO:0009250 BP glucan biosynthetic process 2/1105 45/162410.820554875 0.991285181  
 0.794277236 IGF1/SORBS1 2  
 GO:0045912 BP negative regulation of carbohydrate metabolic process 2/1105  
 45/162410.820554875 0.991285181 0.794277236 ADIPOQ/FOXA2 2  
 GO:0061912 BP selective autophagy 2/1105 45/162410.820554875 0.991285181  
 0.794277236 HSPB8/MAP1LC3C 2  
 GO:0009895 BP negative regulation of catabolic process 16/1105 285/16241  
 0.821083994 0.991680497 0.794593986  
 CNR1/DAZL/FLNA/FMN2/IL10RA/MAP1A/RBM24/TIMP2/TIMP3/VIP/APOA2/APOBEC1/APO  
 C3/DAPL1/IGF2BP1/TRIM40 16  
 GO:1905477 BP positive regulation of protein localization to membrane 6/1105  
 118/16241 0.821938628 0.992468668 0.795225517

CLIP3/EPHA3/ITGB2/KCNB1/SORBS1/STAC 6

GO:0070085 BP glycosylation 14/1105 253/16241 0.824128804 0.993743996  
0.796247385

EXTL1/GFPT2/GXYLT2/MGAT5B/ST6GAL2/ST6GALNAC5/ST8SIA2/ST8SIA6/TMTC1/FUT3/MUC  
C15/MUC17/MUC21/MUC4 14

GO:0002431 BP Fc receptor mediated stimulatory signaling pathway 4/1105 83/16241  
0.824906616 0.993743996 0.796247385 FCGR2B/FCGR3A/PTPRC/WIPF1 4

GO:0006094 BP gluconeogenesis 4/1105 83/16241 0.824906616 0.993743996  
0.796247385 ADIPOQ/FBP2/G6PC/PCK1 4

GO:0051453 BP regulation of intracellular pH 4/1105 83/16241 0.824906616 0.993743996  
0.796247385 ATP6V1C2/NOX1/SLC26A3/SLC9A2 4

GO:0030041 BP actin filament polymerization 9/1105 170/16241 0.825260109  
0.993743996 0.796247385 ADD2/CCL21/CCR7/ELN/FMN2/GAS7/LMOD1/MAGEL2/SLIT2  
9

GO:0034121 BP regulation of toll-like receptor signaling pathway 3/1105 65/16241  
0.82797206 0.993743996 0.796247385 LILRA4/PTPRS/TLR93

GO:0001945 BP lymph vessel development 1/1105 25/16241 0.828457179 0.993743996  
0.796247385 HEG1 1

GO:0003309 BP type B pancreatic cell differentiation 1/1105 25/16241 0.828457179  
0.993743996 0.796247385 RFX6 1

GO:0006730 BP one-carbon metabolic process 1/1105 25/16241 0.828457179  
0.993743996 0.796247385 CA1 1

GO:0009299 BP mRNA transcription 1/1105 25/16241 0.828457179 0.993743996  
0.796247385 FLNA 1

GO:0010954 BP positive regulation of protein processing 1/1105 25/16241 0.828457179  
0.993743996 0.796247385 SPON1 1

GO:0032438 BP melanosome organization 1/1105 25/16241 0.828457179 0.993743996  
0.796247385 ZEB2 1

GO:0032616 BP interleukin-13 production 1/1105 25/16241 0.828457179 0.993743996  
0.796247385 SCGB1A1 1

GO:0034035 BP purine ribonucleoside bisphosphate metabolic process 1/1105  
25/16241 0.828457179 0.993743996 0.796247385 SULT2A1 1

GO:0034110 BP regulation of homotypic cell-cell adhesion 1/1105 25/16241 0.828457179  
0.993743996 0.796247385 FGG 1

GO:0035459 BP cargo loading into vesicle 1/1105 25/16241 0.828457179 0.993743996  
0.796247385 CTAGE4 1

GO:0048169 BP regulation of long-term neuronal synaptic plasticity 1/1105 25/16241  
0.828457179 0.993743996 0.796247385 NETO1 1

GO:0051156 BP glucose 6-phosphate metabolic process 1/1105 25/16241 0.828457179  
0.993743996 0.796247385 G6PC 1

GO:0060444 BP branching involved in mammary gland duct morphogenesis 1/1105  
25/16241 0.828457179 0.993743996 0.796247385 AR 1

GO:0071378 BP cellular response to growth hormone stimulus 1/1105 25/16241  
0.828457179 0.993743996 0.796247385 GHR 1

GO:0072539 BP T-helper 17 cell differentiation 1/1105 25/162410.828457179  
 0.993743996 0.796247385 IL12B 1  
 GO:0080111 BP DNA demethylation 1/1105 25/162410.828457179 0.993743996  
 0.796247385 APOBEC1 1  
 GO:0099632 BP protein transport within plasma membrane 1/1105 25/162410.828457179  
 0.993743996 0.796247385 CACNG7 1  
 GO:0099637 BP neurotransmitter receptor transport 1/1105 25/162410.828457179  
 0.993743996 0.796247385 CACNG7 1  
 GO:1902932 BP positive regulation of alcohol biosynthetic process 1/1105 25/16241  
 0.828457179 0.993743996 0.796247385 ADCYAP1R1 1  
 GO:1903579 BP negative regulation of ATP metabolic process 1/1105 25/16241  
 0.828457179 0.993743996 0.796247385 MLXIPL 1  
 GO:2000781 BP positive regulation of double-strand break repair 1/1105 25/16241  
 0.828457179 0.993743996 0.796247385 FMN2 1  
 GO:0014075 BP response to amine 2/1105 46/162410.829938677 0.994549593  
 0.796892879 RGS4/PPP1R1B 2  
 GO:0043370 BP regulation of CD4-positive, alpha-beta T cell differentiation 2/1105  
 46/162410.829938677 0.994549593 0.796892879 CCL19/IL12B 2  
 GO:0070534 BP protein K63-linked ubiquitination 2/1105 46/162410.829938677  
 0.994549593 0.796892879 MAGEL2/RNF186 2  
 GO:0120163 BP negative regulation of cold-induced thermogenesis 2/1105 46/16241  
 0.829938677 0.994549593 0.796892879 ADIPOQ/NPR32  
 GO:0043488 BP regulation of mRNA stability 9/1105 171/16241 0.83030764  
 0.994749055 0.797052699  
 CACNG7/DAZL/RBM24/VIM/VIP/APOBEC1/IGF2BP1/SCGB1A1/TRIM71 9  
 GO:0032271 BP regulation of protein polymerization 11/1105 205/16241 0.831790894  
 0.996283071 0.798281845  
 ADD2/CCL21/CCR7/CLIP3/ELN/FMN2/LMOD1/MAGEL2/NAV3/SLIT2/STMN2 11  
 GO:0006650 BP glycerophospholipid metabolic process 17/1105 305/16241 0.83540883  
 1 0.801260072  
 CHAT/CSF1R/FGF2/HTR2A/PCYT1B/PDGFRB/PI4K2B/PLA2G2D/ALPI/APOA1/APOA2/APOA4/  
 APOA5/HTR2C/PLA2G2F/PLA2G4E/PLA2G4F17  
 GO:0002699 BP positive regulation of immune effector process 11/1105 206/16241  
 0.836300449 1 0.801260072  
 CCL19/CCR2/CD1C/CRTAM/FCER2/IL12B/IL21/ITGB2/KLRC4-KLRK1/PTPRC/TLR9 11  
 GO:0035305 BP negative regulation of dephosphorylation 5/1105 103/16241  
 0.838115866 1 0.801260072 CCDC8/PPP1R14C/PPP1R14D/PPP1R1B/PPP1R275  
 GO:0008089 BP anterograde axonal transport 2/1105 47/162410.838877699 1  
 0.801260072 MAP1A/NEFL 2  
 GO:0042398 BP cellular modified amino acid biosynthetic process 2/1105 47/16241  
 0.838877699 1 0.801260072 GGT5/GGT6 2  
 GO:0061014 BP positive regulation of mRNA catabolic process 2/1105 47/16241  
 0.838877699 1 0.801260072 RBM24/TRIM71 2  
 GO:0061647 BP histone H3-K9 modification 2/1105 47/162410.838877699 1

0.801260072 NAP1L2/PRDM12 2  
 GO:0070231 BP T cell apoptotic process 2/1105 47/162410.838877699 1 0.801260072  
 CLC/GLI3 2  
 GO:0098586 BP cellular response to virus 2/1105 47/162410.838877699 1  
 0.801260072 CCL19/PENK 2  
 GO:0035966 BP response to topologically incorrect protein 10/1105 190/16241  
 0.84013278 1 0.801260072  
 COMP/DNAJB5/EXTL1/HSPB2/HSPB3/HSPB7/HSPB8/THBS1/THBS4/CREB3L3 10  
 GO:0009651 BP response to salt stress 1/1105 26/162410.840146548 1 0.801260072  
 EPO 1  
 GO:0022616 BP DNA strand elongation 1/1105 26/162410.840146548 1 0.801260072  
 TERT1  
 GO:0032800 BP receptor biosynthetic process 1/1105 26/162410.840146548 1  
 0.801260072 ADIPOQ 1  
 GO:0042044 BP fluid transport 1/1105 26/162410.840146548 1 0.801260072 PDZD3  
 1  
 GO:0048753 BP pigment granule organization 1/1105 26/162410.840146548 1  
 0.801260072 ZEB2 1  
 GO:0051569 BP regulation of histone H3-K4 methylation 1/1105 26/162410.840146548  
 1 0.801260072 CTCFL 1  
 GO:0055003 BP cardiac myofibril assembly 1/1105 26/162410.840146548 1  
 0.801260072 PDGFRB 1  
 GO:0060706 BP cell differentiation involved in embryonic placenta development 1/1105  
 26/162410.840146548 1 0.801260072 ASCL2 1  
 GO:1902175 BP regulation of oxidative stress-induced intrinsic apoptotic signaling pathway  
 1/1105 26/162410.840146548 1 0.801260072 NOX1 1  
 GO:0002292 BP T cell differentiation involved in immune response 3/1105 67/16241  
 0.843143447 1 0.801260072 CCL19/FGL2/IL12B 3  
 GO:0061515 BP myeloid cell development 3/1105 67/162410.843143447 1  
 0.801260072 FBN1/TRIM58/EPO 3  
 GO:0019319 BP hexose biosynthetic process 4/1105 86/162410.845260772 1  
 0.801260072 ADIPOQ/FBP2/G6PC/PCK1 4  
 GO:0006606 BP protein import into nucleus 7/1105 140/16241 0.847416171 1  
 0.801260072 AGTR2/FLNA/GLI3/PRICKLE1/SIX2/CHP2/SIX3 7  
 GO:0002286 BP T cell activation involved in immune response 5/1105 105/16241  
 0.849976337 1 0.801260072 CCL19/CD1C/FCGR2B/FGL2/IL12B 5  
 GO:0008088 BP axo-dendritic transport 3/1105 68/162410.850284857 1 0.801260072  
 MAP1A/NEFL/UCHL1 3  
 GO:0070988 BP demethylation 3/1105 68/162410.850284857 1 0.801260072  
 APOBEC1/CYP3A4/CYP3A43 3  
 GO:0000188 BP inactivation of MAPK activity 1/1105 27/162410.851040046 1  
 0.801260072 RGS4 1  
 GO:0002021 BP response to dietary excess 1/1105 27/162410.851040046 1  
 0.801260072 APOE 1

GO:0006829 BP zinc ion transport 1/1105 27/162410.851040046 1 0.801260072  
SLC30A10 1

GO:0006972 BP hyperosmotic response 1/1105 27/162410.851040046 1 0.801260072  
EPO 1

GO:0007205 BP protein kinase C-activating G protein-coupled receptor signaling pathway  
1/1105 27/162410.851040046 1 0.801260072 GAP43 1

GO:0031440 BP regulation of mRNA 3'-end processing 1/1105 27/162410.851040046 1  
0.801260072 CPEB1 1

GO:0032673 BP regulation of interleukin-4 production 1/1105 27/162410.851040046 1  
0.801260072 SCGB1A1 1

GO:0034661 BP ncRNA catabolic process 1/1105 27/162410.851040046 1 0.801260072  
LIN28B 1

GO:0070198 BP protein localization to chromosome, telomeric region 1/1105 27/16241  
0.851040046 1 0.801260072 TERT1

GO:0070301 BP cellular response to hydrogen peroxide 4/1105 87/162410.851586948 1  
0.801260072 AXL/CYP1B1/FABP1/LCN2 4

GO:0006865 BP amino acid transport 7/1105 141/16241 0.852438398 1  
0.801260072 ATP1A2/NPY5R/NTRK2/RGS4/SLC6A17/SYT4/SLC6A7 7

GO:0043487 BP regulation of RNA stability 9/1105 176/16241 0.853867883 1  
0.801260072 CACNG7/DAZL/RBM24/VIM/VIP/APOBEC1/IGF2BP1/SCGB1A1/TRIM71 9

GO:0001961 BP positive regulation of cytokine-mediated signaling pathway 2/1105  
49/162410.855489225 1 0.801260072 AXL/C1QTNF4 2

GO:0007131 BP reciprocal meiotic recombination 2/1105 49/162410.855489225 1  
0.801260072 HFM1/MCMDC2 2

GO:0051055 BP negative regulation of lipid biosynthetic process 2/1105 49/16241  
0.855489225 1 0.801260072 APOE/APOC3 2

GO:0006821 BP chloride transport 5/1105 106/16241 0.855631026 1 0.801260072  
GABRA5/SLC12A3/CLCA4/GABRA4/SLC26A3 5

GO:0032868 BP response to insulin 14/1105 261/16241 0.855751644 1 0.801260072  
ADIPOQ/CPEB1/EGR2/PLN/PRKCB/PTPRN/RAB31/RETN/SORBS1/APOBEC1/ATP6V1C2/OTC/  
PCK1/PCSK9 14

GO:0017148 BP negative regulation of translation 6/1105 124/16241 0.855809027 1  
0.801260072 C8orf88/CPEB1/IGFBP5/RBM24/IGF2BP1/TRIM71 6

GO:0032273 BP positive regulation of protein polymerization 6/1105 124/16241  
0.855809027 1 0.801260072 CCL21/CCR7/FMN2/LMOD1/MAGEL2/NAV3 6

GO:0071479 BP cellular response to ionizing radiation 3/1105 69/162410.857141324 1  
0.801260072 CRYAB/SFRP1/SFRP2 3

GO:0045639 BP positive regulation of myeloid cell differentiation 4/1105 88/16241  
0.85769249 1 0.801260072 IL12B/ROR2/TRIM58/IL17A 4

GO:0043122 BP regulation of I-kappaB kinase/NF-kappaB signaling 12/1105 228/16241  
0.857789032 1 0.801260072  
ADIPOQ/CCL19/CCL21/CCR7/CLEC6A/FLNA/LURAP1/PRKCB/TLR9/IL36G/IL36RN/IL37 12

GO:1902806 BP regulation of cell cycle G1/S phase transition 8/1105 160/16241  
0.859670522 1 0.801260072

ADAMTS1/DACT1/FGF10/FHL1/GPNMB/KCNA5/C10orf99/TERT 8

GO:0042177 BP negative regulation of protein catabolic process 6/1105 125/16241  
0.860905376 1 0.801260072 FLNA/FMN2/MAP1A/TIMP2/TIMP3/TRIM406

GO:0044106 BP cellular amine metabolic process 6/1105 125/16241 0.860905376 1  
0.801260072 ATCAY/IDO2/ITGB2/MOXD1/ABCC2/DDC 6

GO:0000027 BP ribosomal large subunit assembly 1/1105 28/162410.861191813 1  
0.801260072 RPL3L 1

GO:0000083 BP regulation of transcription involved in G1/S transition of mitotic cell cycle  
1/1105 28/162410.861191813 1 0.801260072 CCNA1 1

GO:0002082 BP regulation of oxidative phosphorylation 1/1105 28/162410.861191813 1  
0.801260072 MLXIPL 1

GO:0003209 BP cardiac atrium morphogenesis 1/1105 28/162410.861191813 1  
0.801260072 HEG1 1

GO:0006356 BP regulation of transcription by RNA polymerase I 1/1105 28/16241  
0.861191813 1 0.801260072 FLNA 1

GO:0031116 BP positive regulation of microtubule polymerization 1/1105 28/16241  
0.861191813 1 0.801260072 NAV3 1

GO:0042219 BP cellular modified amino acid catabolic process 1/1105 28/16241  
0.861191813 1 0.801260072 GGT5 1

GO:0045648 BP positive regulation of erythrocyte differentiation 1/1105 28/16241  
0.861191813 1 0.801260072 TRIM58 1

GO:0048741 BP skeletal muscle fiber development 1/1105 28/162410.861191813 1  
0.801260072 P2RX2 1

GO:0051085 BP chaperone cofactor-dependent protein refolding 1/1105 28/16241  
0.861191813 1 0.801260072 DNAJB5 1

GO:0071480 BP cellular response to gamma radiation 1/1105 28/162410.861191813 1  
0.801260072 CRYAB 1

GO:0072538 BP T-helper 17 type immune response 1/1105 28/162410.861191813 1  
0.801260072 IL12B 1

GO:0090383 BP phagosome acidification 1/1105 28/162410.861191813 1 0.801260072  
ATP6V1C2 1

GO:1902668 BP negative regulation of axon guidance 1/1105 28/162410.861191813 1  
0.801260072 SLIT2 1

GO:0051607 BP defense response to virus 12/1105 229/16241 0.861607046 1  
0.801260072  
ABCC9/CXCL9/FGL2/FLNA/IL12B/PTPRC/TLR7/TLR8/TLR9/APOBEC1/DEFA1/DMBT1 12

GO:0051090 BP regulation of DNA-binding transcription factor activity 23/1105 411/16241  
0.86224017 1 0.801260072  
ALK/AR/BEX1/CAMK2A/CMKLR1/CYP1B1/DDR2/EPHA5/FLNA/HAND2/HEYL/ITGB2/MYOC/D/PRKCB/PTGIS/RELN/SFRP4/TLR9/BMP7/FOXA2/FOXH1/NEUROD1/TRIM40 23

GO:0035825 BP homologous recombination 2/1105 50/162410.863194959 1  
0.801260072 HFM1/MCMDC2 2

GO:0045652 BP regulation of megakaryocyte differentiation 2/1105 50/162410.863194959  
1 0.801260072 MYL9/THBS1 2

GO:0045840 BP positive regulation of mitotic nuclear division 2/1105 50/16241  
 0.863194959 1 0.801260072 IGF1/PDGFRB 2  
 GO:1902475 BP L-alpha-amino acid transmembrane transport 2/1105 50/16241  
 0.863194959 1 0.801260072 ATP1A2/RGS4 2  
 GO:0050871 BP positive regulation of B cell activation 3/1105 70/16241 0.863721298 1  
 0.801260072 IL21/PTPRC/TLR9 3  
 GO:0046474 BP glycerophospholipid biosynthetic process 11/1105 213/16241  
 0.865305181 1 0.801260072  
 CHAT/FGF2/HTR2A/PCYT1B/PI4K2B/PLA2G2D/ALPI/APOA1/APOA2/HTR2C/PLA2G2F 11  
 GO:0010906 BP regulation of glucose metabolic process 5/1105 108/16241  
 0.866407477 1 0.801260072 ADIPOQ/IGF1/IGFBP4/SORBS1/FOXA2 5  
 GO:0019884 BP antigen processing and presentation of exogenous antigen 9/1105  
 179/16241 0.866707982 1 0.801260072  
 CD1C/CYBB/FCGR2B/HLA-DOA/HLA-DPA1/HLA-DPB1/HLA-DQA1/HLA-DQA2/HLA-DQB2 9  
 GO:0010950 BP positive regulation of endopeptidase activity 8/1105 162/16241  
 0.868454759 1 0.801260072 COL4A3/CR1/NGF/NGFR/SFRP2/KHDC1L/SEMG1/XDH 8  
 GO:0038061 BP NIK/NF-kappaB signaling 8/1105 162/16241 0.868454759 1  
 0.801260072 ALK/C1QTNF4/CCL19/IL12B/TLR7/TLR9/BMP7/TRIM40 8  
 GO:0006635 BP fatty acid beta-oxidation 3/1105 71/16241 0.870033209 1 0.801260072  
 ADIPOQ/CNR1/FABP1 3  
 GO:0007029 BP endoplasmic reticulum organization 2/1105 51/16241 0.870522292 1  
 0.801260072 CASQ1/REEP2 2  
 GO:0045839 BP negative regulation of mitotic nuclear division 2/1105 51/16241  
 0.870522292 1 0.801260072 PTTG2/BMP7 2  
 GO:0000002 BP mitochondrial genome maintenance 1/1105 29/16241 0.87065231 1  
 0.801260072 AKT3 1  
 GO:0007628 BP adult walking behavior 1/1105 29/16241 0.87065231 1 0.801260072  
 UCHL1 1  
 GO:0010800 BP positive regulation of peptidyl-threonine phosphorylation 1/1105  
 29/16241 0.87065231 1 0.801260072 BMP7 1  
 GO:0016056 BP rhodopsin mediated signaling pathway 1/1105 29/16241 0.87065231 1  
 0.801260072 GNGT1 1  
 GO:0045191 BP regulation of isotype switching 1/1105 29/16241 0.87065231 1  
 0.801260072 PTPRC 1  
 GO:0045736 BP negative regulation of cyclin-dependent protein serine/threonine kinase  
 activity 1/1105 29/16241 0.87065231 1 0.801260072 MYOCD 1  
 GO:0046596 BP regulation of viral entry into host cell 1/1105 29/16241 0.87065231 1  
 0.801260072 FCN1 1  
 GO:0070286 BP axonemal dynein complex assembly 1/1105 29/16241 0.87065231 1  
 0.801260072 ARMC4 1  
 GO:0051648 BP vesicle localization 16/1105 299/16241 0.871570579 1 0.801260072  
 CAMK2A/CDH2/CHRM2/CHRNA6/CNR1/GRIA1/GRIK5/HTR2A/NLGN1/PRKCB/SNAP91/SYND  
 IG1/SYT11/SYT4/FOLR1/MYO1A 16  
 GO:0005996 BP monosaccharide metabolic process 15/1105 283/16241 0.873838074

1 0.801260072  
 ADIPOQ/IGF1/IGFBP4/NPY1R/PGM5/SORBS1/FBP2/FOXA2/G6PC/PCK1/UGT1A1/UGT1A3/U  
 GT1A7/UGT1A8/UGT1A9 15  
 GO:0043255 BP regulation of carbohydrate biosynthetic process 4/1105 91/16241  
 0.874738275 1 0.801260072 ADCYAP1R1/ADIPOQ/IGF1/SORBS1 4  
 GO:0034605 BP cellular response to heat 6/1105 128/16241 0.875307597 1  
 0.801260072 ARPP21/CAMK2A/CRYAB/HSPB8/STAC/THBS1 6  
 GO:2000045 BP regulation of G1/S transition of mitotic cell cycle 7/1105 146/16241  
 0.875574237 1 0.801260072 ADAMTS1/DACT1/FGF10/FHL1/GPNMB/KCNA5/TERT 7  
 GO:0002066 BP columnar/cuboidal epithelial cell development 2/1105 52/16241  
 0.877486988 1 0.801260072 FGFR1/NKX3-22  
 GO:0006998 BP nuclear envelope organization 2/1105 52/16241 0.877486988 1  
 0.801260072 PRKCB/SUN3 2  
 GO:0051438 BP regulation of ubiquitin-protein transferase activity 2/1105 52/16241  
 0.877486988 1 0.801260072 MAGEA2/MAGEA2B 2  
 GO:0000038 BP very long-chain fatty acid metabolic process 1/1105 30/16241 0.87946857  
 1 0.801260072 CYP4F2 1  
 GO:0001963 BP synaptic transmission, dopaminergic 1/1105 30/16241 0.87946857 1  
 0.801260072 SLC6A2 1  
 GO:0002828 BP regulation of type 2 immune response 1/1105 30/16241 0.87946857 1  
 0.801260072 CCR2 1  
 GO:0006376 BP mRNA splice site selection 1/1105 30/16241 0.87946857 1  
 0.801260072 CELF2 1  
 GO:0006471 BP protein ADP-ribosylation 1/1105 30/16241 0.87946857 1 0.801260072  
 ART4 1  
 GO:0035066 BP positive regulation of histone acetylation 1/1105 30/16241 0.87946857  
 1 0.801260072 NAP1L2 1  
 GO:0036003 BP positive regulation of transcription from RNA polymerase II promoter in  
 response to stress 1/1105 30/16241 0.87946857 1 0.801260072 CREB3L3 1  
 GO:0045948 BP positive regulation of translational initiation 1/1105 30/16241 0.87946857  
 1 0.801260072 DAZL 1  
 GO:0048384 BP retinoic acid receptor signaling pathway 1/1105 30/16241 0.87946857  
 1 0.801260072 RXRG 1  
 GO:0061082 BP myeloid leukocyte cytokine production 1/1105 30/16241 0.87946857 1  
 0.801260072 TGFB3 1  
 GO:1904030 BP negative regulation of cyclin-dependent protein kinase activity 1/1105  
 30/16241 0.87946857 1 0.801260072 MYOCD 1  
 GO:0046364 BP monosaccharide biosynthetic process 4/1105 92/16241 0.880014384 1  
 0.801260072 ADIPOQ/FBP2/G6PC/PCK1 4  
 GO:0051289 BP protein homotetramerization 4/1105 92/16241 0.880014384 1  
 0.801260072 ACTN2/DPYS/SYT11/REG1A 4  
 GO:1901989 BP positive regulation of cell cycle phase transition 4/1105 92/16241  
 0.880014384 1 0.801260072 ADAMTS1/FGF10/KCNA5/TERT 4  
 GO:2001243 BP negative regulation of intrinsic apoptotic signaling pathway 4/1105

92/162410.880014384 1 0.801260072 CXCL12/SFRP2/EPO/MAGEA34  
 GO:0006006 BP glucose metabolic process 10/1105 200/16241 0.880875397 1  
 0.801260072 ADIPOQ/IGF1/IGFBP4/NPY1R/PGM5/SORBS1/FBP2/FOXA2/G6PC/PCK1 10  
 GO:1900371 BP regulation of purine nucleotide biosynthetic process 5/1105 111/16241  
 0.881295831 1 0.801260072 HTR2A/IGF1/GUCA2A/MLXIPL/PDZD3 5  
 GO:0043367 BP CD4-positive, alpha-beta T cell differentiation 3/1105 73/16241  
 0.881886322 1 0.801260072 CCL19/IL12B/PLA2G2D 3  
 GO:0046785 BP microtubule polymerization 3/1105 73/162410.881886322 1  
 0.801260072 CLIP3/NAV3/STMN2 3  
 GO:0044282 BP small molecule catabolic process 24/1105 435/16241 0.882788994 1  
 0.801260072  
 ADIPOQ/APOE/CDO1/CNR1/DPYS/FGF2/GADL1/IDO2/NT5C1A/ADH7/ADTRP/AGXT/AGXT2/  
 AKR1B10/APOBEC1/CEL/CYP4F2/ENTPD8/FABP1/FGF23/OTC/PAH/PCK1/SULT2A1 24  
 GO:0032781 BP positive regulation of ATPase activity 2/1105 53/162410.884104419 1  
 0.801260072 FGF10/MYL3 2  
 GO:0035065 BP regulation of histone acetylation 2/1105 53/162410.884104419 1  
 0.801260072 MYOCD/NAP1L2 2  
 GO:0051701 BP interaction with host 10/1105 201/16241 0.884439323 1  
 0.801260072 AXL/CLEC4G/CR1/CR2/FCN1/HTR2A/MRC1/NCAM1/CLDN9/DEFA1 10  
 GO:0043648 BP dicarboxylic acid metabolic process 4/1105 93/162410.885096502 1  
 0.801260072 ATCAY/FOLR2/FOLR1/PCK1 4  
 GO:0030808 BP regulation of nucleotide biosynthetic process 5/1105 112/16241  
 0.885933415 1 0.801260072 HTR2A/IGF1/GUCA2A/MLXIPL/PDZD3 5  
 GO:0042752 BP regulation of circadian rhythm 5/1105 112/16241 0.885933415 1  
 0.801260072 KCNA2/MAGEL2/NLGN1/PTGDS/RORB 5  
 GO:0071214 BP cellular response to abiotic stimulus 17/1105 321/16241 0.88728686  
 1 0.801260072  
 ATP1A2/COL1A1/CRYAB/GPR88/KCNK4/MAG/MFAP4/MYLK/SFRP1/SFRP2/TLR7/TLR8/EPO/  
 NGGT1/NOX1/PCK1/RGR 17  
 GO:0104004 BP cellular response to environmental stimulus 17/1105 321/16241  
 0.88728686 1 0.801260072  
 ATP1A2/COL1A1/CRYAB/GPR88/KCNK4/MAG/MFAP4/MYLK/SFRP1/SFRP2/TLR7/TLR8/EPO/  
 NGGT1/NOX1/PCK1/RGR 17  
 GO:0006081 BP cellular aldehyde metabolic process 3/1105 74/162410.887444085 1  
 0.801260072 CYP1B1/AGXT/AGXT2 3  
 GO:0032481 BP positive regulation of type I interferon production 3/1105 74/16241  
 0.887444085 1 0.801260072 TLR7/TLR8/TLR9 3  
 GO:0000266 BP mitochondrial fission 1/1105 31/162410.887684425 1 0.801260072  
 DCN 1  
 GO:0002888 BP positive regulation of myeloid leukocyte mediated immunity 1/1105  
 31/162410.887684425 1 0.801260072 ITGB2 1  
 GO:0019098 BP reproductive behavior 1/1105 31/162410.887684425 1 0.801260072  
 PPP1R1B 1  
 GO:0035510 BP DNA dealkylation 1/1105 31/162410.887684425 1 0.801260072

# APOBEC1 1

GO:0035774 BP positive regulation of insulin secretion involved in cellular response to glucose stimulus 1/1105 31/162410.887684425 1 0.801260072 RFX6 1

GO:0038128 BP ERBB2 signaling pathway 1/1105 31/162410.887684425 1 0.801260072 MYOC 1

GO:0040018 BP positive regulation of multicellular organism growth 1/1105 31/162410.887684425 1 0.801260072 GHR 1

GO:0043516 BP regulation of DNA damage response, signal transduction by p53 class mediator 1/1105 31/162410.887684425 1 0.801260072 HIC1 1

GO:0050685 BP positive regulation of mRNA processing 1/1105 31/162410.887684425 1 0.801260072 CPEB1 1

GO:0060317 BP cardiac epithelial to mesenchymal transition 1/1105 31/162410.887684425 1 0.801260072 HEYL 1

GO:0090659 BP walking behavior 1/1105 31/162410.887684425 1 0.801260072 UCHL1 1

GO:1903825 BP organic acid transmembrane transport 6/1105 131/16241 0.88843918 1 0.801260072 ATP1A2/FOLR2/RGS4/THBS1/FOLR1/SLC6A7 6

GO:1905039 BP carboxylic acid transmembrane transport 6/1105 131/16241 0.88843918 1 0.801260072 ATP1A2/FOLR2/RGS4/THBS1/FOLR1/SLC6A7 6

GO:0044262 BP cellular carbohydrate metabolic process 14/1105 271/16241 0.888870523 1 0.801260072 ADCYAP1R1/ADIPOQ/EXTL1/HAS1/IGF1/IGFBP4/PYGM/SORBS1/FBP2/FOXA2/G6PC/MOGAT 2/MOGAT3/PCK1 14

GO:0009435 BP NAD biosynthetic process 2/1105 54/162410.890389546 1 0.801260072 IDO2/PTGIS 2

GO:2001244 BP positive regulation of intrinsic apoptotic signaling pathway 2/1105 54/162410.890389546 1 0.801260072 NOX1/RNF183 2

GO:0051193 BP regulation of cofactor metabolic process 5/1105 113/16241 0.890414764 1 0.801260072 HTR2A/IGF1/DUOX2/MLXIPL/MMP3 5

GO:1904375 BP regulation of protein localization to cell periphery 5/1105 113/16241 0.890414764 1 0.801260072 AR/CLIP3/EPHA3/SORBS1/STAC 5

GO:1901264 BP carbohydrate derivative transport 3/1105 75/162410.89276687 1 0.801260072 G6PC/SLC17A4/SLC28A2 3

GO:0015012 BP heparan sulfate proteoglycan biosynthetic process 1/1105 32/16241 0.89534073 1 0.801260072 EXTL1 1

GO:0030261 BP chromosome condensation 1/1105 32/162410.89534073 1 0.801260072 BANF2 1

GO:0032148 BP activation of protein kinase B activity 1/1105 32/162410.89534073 1 0.801260072 IGF1 1

GO:0034314 BP Arp2/3 complex-mediated actin nucleation 1/1105 32/162410.89534073 1 0.801260072 MAGEL2 1

GO:0043094 BP cellular metabolic compound salvage 1/1105 32/162410.89534073 1 0.801260072 BHMT2 1

GO:0046466 BP membrane lipid catabolic process 1/1105 32/162410.89534073 1

0.801260072 CYP1B1 1  
 GO:0051084 BP 'de novo' posttranslational protein folding 1/1105 32/162410.89534073  
 1 0.801260072 DNAJB5 1  
 GO:0071353 BP cellular response to interleukin-4 1/1105 32/162410.89534073 1  
 0.801260072 MRC1 1  
 GO:0097502 BP mannosylation 1/1105 32/162410.89534073 1 0.801260072 TMTC1  
 1  
 GO:0001541 BP ovarian follicle development 2/1105 55/162410.896356904 1  
 0.801260072 ADCYAP1/PCYT1B 2  
 GO:0044380 BP protein localization to cytoskeleton 2/1105 55/162410.896356904 1  
 0.801260072 HTR2A/MAP1A 2  
 GO:0046148 BP pigment biosynthetic process 2/1105 55/162410.896356904 1  
 0.801260072 ZEB2/SLC45A2 2  
 GO:0010675 BP regulation of cellular carbohydrate metabolic process 6/1105 133/16241  
 0.896526245 1 0.801260072 ADCYAP1R1/ADIPOQ/IGF1/IGFBP4/SORBS1/FOXA2 6  
 GO:0030010 BP establishment of cell polarity 6/1105 133/16241 0.896526245 1  
 0.801260072 CCL19/CCL21/CCR7/FGF10/JAM3/ACTL8 6  
 GO:0051098 BP regulation of binding 19/1105 358/16241 0.896651763 1  
 0.801260072  
 ADD2/ADIPOQ/APOE/CFHR1/CRTAC1/DACT1/DKK1/EBF2/GREM2/HAND2/IGF1/MYOCD/NG  
 F/PLN/SPON1/CARD18/NEUROD1/PCSK9/TERT 19  
 GO:0007265 BP Ras protein signal transduction 24/1105 441/16241 0.896972337 1  
 0.801260072  
 AGTR1/APOE/ARHGEF25/COL1A2/COL3A1/FGF10/FGF2/GPR174/HEG1/IGF1/MRAS/MYOC/  
 NGF/NGFR/P2RY10/PDGFRB/PECAM1/PSD/RAB31/TIMP2/APOA1/APOC3/EPO/RHOV 24  
 GO:0006110 BP regulation of glycolytic process 3/1105 76/162410.897862701 1  
 0.801260072 HTR2A/IGF1/MLXIPL 3  
 GO:1900034 BP regulation of cellular response to heat 3/1105 76/162410.897862701 1  
 0.801260072 CAMK2A/CRYAB/HSPB8 3  
 GO:1990823 BP response to leukemia inhibitory factor 4/1105 96/162410.899232141 1  
 0.801260072 GFPT2/LAPTM5/MRAS/NRP2 4  
 GO:1990830 BP cellular response to leukemia inhibitory factor 4/1105 96/16241  
 0.899232141 1 0.801260072 GFPT2/LAPTM5/MRAS/NRP2 4  
 GO:1902600 BP proton transmembrane transport 6/1105 134/16241 0.900378351 1  
 0.801260072 ATP1A2/ATP1A4/ATP2C2/ATP6V1C2/COX7B2/SLC9A2 6  
 GO:0045739 BP positive regulation of DNA repair 2/1105 56/162410.90202059 1  
 0.801260072 FGF10/FMN2 2  
 GO:0060760 BP positive regulation of response to cytokine stimulus 2/1105 56/16241  
 0.90202059 1 0.801260072 AXL/C1QTNF4 2  
 GO:0006536 BP glutamate metabolic process 1/1105 33/162410.902475563 1  
 0.801260072 ATCAY 1  
 GO:0043276 BP anoikis 1/1105 33/162410.902475563 1 0.801260072 NTRK2 1  
 GO:0046627 BP negative regulation of insulin receptor signaling pathway 1/1105  
 33/162410.902475563 1 0.801260072 PRKCB 1

GO:0071868 BP cellular response to monoamine stimulus 1/1105 33/162410.902475563  
1 0.801260072 ADIPOQ 1

GO:0071870 BP cellular response to catecholamine stimulus 1/1105 33/162410.902475563  
1 0.801260072 ADIPOQ 1

GO:0098751 BP bone cell development 1/1105 33/162410.902475563 1 0.801260072  
FBN1 1

GO:2000758 BP positive regulation of peptidyl-lysine acetylation 1/1105 33/16241  
0.902475563 1 0.801260072 NAP1L2 1

GO:0030811 BP regulation of nucleotide catabolic process 3/1105 77/162410.902739476  
1 0.801260072 HTR2A/IGF1/MLXIPL 3

GO:0072524 BP pyridine-containing compound metabolic process 9/1105 189/16241  
0.903053687 1 0.801260072  
AOX1/FMO1/FMO2/HTR2A/IDO2/IGF1/PTGIS/MLXIPL/NOX1 9

GO:0001824 BP blastocyst development 4/1105 97/162410.903591359 1 0.801260072  
CMTM3/IGF1/ST8SIA6/CDX2 4

GO:0031330 BP negative regulation of cellular catabolic process 12/1105 242/16241  
0.90420838 1 0.801260072  
CNR1/DAZL/IL10RA/MAP1A/RBM24/TIMP2/TIMP3/VIP/APOBEC1/APOC3/DAPL1/IGF2BP1  
12

GO:0002478 BP antigen processing and presentation of exogenous peptide antigen 8/1105  
172/16241 0.905872898 1 0.801260072  
CYBB/FCGR2B/HLA-DOA/HLA-DPA1/HLA-DPB1/HLA-DQA1/HLA-DQA2/HLA-DQB2 8

GO:0042093 BP T-helper cell differentiation 2/1105 57/162410.907394258 1  
0.801260072 CCL19/IL12B 2

GO:0042255 BP ribosome assembly 2/1105 57/162410.907394258 1 0.801260072  
RPL3L/VCX 2

GO:0036473 BP cell death in response to oxidative stress 3/1105 78/162410.907404951  
1 0.801260072 CYP1B1/MMP3/NOX1 3

GO:0019395 BP fatty acid oxidation 4/1105 98/162410.90778292 1 0.801260072  
ADIPOQ/CNR1/ADH7/FABP1 4

GO:0010256 BP endomembrane system organization 22/1105 413/16241 0.908110766  
1 0.801260072  
ANK2/ANXA6/AR/ATP8B2/CASQ1/COL5A1/EHD2/GOLGA8H/GOLGA8M/GOLGA8O/PI4K2B/P  
RKCB/PTPRC/PTPRN/REEP2/SYNE1/SYT11/SYT4/TMEFF2/XKR4/NOX1/SUN3 22

GO:0007603 BP phototransduction, visible light 1/1105 34/162410.909124409 1  
0.801260072 GNGT1 1

GO:0010765 BP positive regulation of sodium ion transport 1/1105 34/162410.909124409  
1 0.801260072 CNTN1 1

GO:0032435 BP negative regulation of proteasomal ubiquitin-dependent protein catabolic  
process 1/1105 34/162410.909124409 1 0.801260072 MAP1A 1

GO:0045911 BP positive regulation of DNA recombination 1/1105 34/162410.909124409  
1 0.801260072 PTPRC 1

GO:0046131 BP pyrimidine ribonucleoside metabolic process 1/1105 34/16241  
0.909124409 1 0.801260072 APOBEC1 1

GO:0050691 BP regulation of defense response to virus by host 1/1105 34/16241  
 0.909124409 1 0.801260072 IL12B 1  
 GO:0070670 BP response to interleukin-4 1/1105 34/16241 0.909124409 1  
 0.801260072 MRC1 1  
 GO:0097009 BP energy homeostasis 1/1105 34/16241 0.909124409 1 0.801260072  
 MLXIPL 1  
 GO:0007030 BP Golgi organization 6/1105 137/16241 0.911204053 1 0.801260072  
 ATP8B2/GOLGA8H/GOLGA8M/GOLGA8O/PI4K2B/SYNE1 6  
 GO:0016925 BP protein sumoylation 3/1105 79/16241 0.911866738 1 0.801260072  
 EGR2/MAGEA2/MAGEA2B 3  
 GO:0046513 BP ceramide biosynthetic process 2/1105 58/16241 0.912491108 1  
 0.801260072 ST8SIA2/ST8SIA6 2  
 GO:0032479 BP regulation of type I interferon production 5/1105 119/16241  
 0.914235314 1 0.801260072 LILRA4/PTPRS/TLR7/TLR8/TLR9 5  
 GO:0051101 BP regulation of DNA binding 5/1105 119/16241 0.914235314 1  
 0.801260072 HAND2/IGF1/MYOC/D/NGF/NEUROD1 5  
 GO:0043087 BP regulation of GTPase activity 25/1105 466/16241 0.914527643 1  
 0.801260072  
 ADCYAP1/ADGRB3/ARHGAP20/ARHGAP31/BVES/CCL13/CCL14/CCL19/CCL21/CCR7/CXCL13/  
 EPHA3/EPHA5/GNAO1/KLRC4-KLRK1/NTRK2/PLXNA4/RANBP3L/RGS4/SFRP1/SLIT2/THY1/CCL15/  
 CCL20/GRHL3 25  
 GO:0006520 BP cellular amino acid metabolic process 17/1105 332/16241 0.914709951  
 1 0.801260072  
 ART4/ATCAY/BHMT2/CDO1/DPYS/GADL1/GFPT2/GGT5/IDO2/AGXT/AGXT2/ASPG/DDC/GLYA  
 TL1/IYD/OTC/PAH 17  
 GO:0061013 BP regulation of mRNA catabolic process 9/1105 193/16241 0.915061916  
 1 0.801260072 CACNG7/DAZL/RBM24/VIM/VIP/APOBEC1/IGF2BP1/SCGB1A1/TRIM71  
 9  
 GO:0001893 BP maternal placenta development 1/1105 35/16241 0.915320345 1  
 0.801260072 PTGIS 1  
 GO:0016572 BP histone phosphorylation 1/1105 35/16241 0.915320345 1 0.801260072  
 PRKCB 1  
 GO:0042092 BP type 2 immune response 1/1105 35/16241 0.915320345 1  
 0.801260072 CCR2 1  
 GO:1900077 BP negative regulation of cellular response to insulin stimulus 1/1105  
 35/16241 0.915320345 1 0.801260072 PRKCB 1  
 GO:2001233 BP regulation of apoptotic signaling pathway 20/1105 383/16241  
 0.915335291 1 0.801260072  
 AGTR2/AR/CXCL12/FGF10/FGFR1/IGF1/PTPRC/SERPINE1/SFRP1/SFRP2/THBS1/TIMP3/EPO/  
 FGA/FGB/FGG/MAGEA3/NOX1/RNF183/TERT 20  
 GO:0034440 BP lipid oxidation 4/1105 100/16241 0.915683475 1 0.801260072  
 ADIPOQ/CNR1/ADH7/FABP1 4  
 GO:1905897 BP regulation of response to endoplasmic reticulum stress 3/1105  
 80/16241 0.916132288 1 0.801260072 FCGR2B/MAGEA3/RNF183 3

GO:0002294 BP CD4-positive, alpha-beta T cell differentiation involved in immune response  
2/1105 59/162410.917323892 1 0.801260072 CCL19/IL12B 2

GO:0051784 BP negative regulation of nuclear division 2/1105 59/162410.917323892 1  
0.801260072 PTTG2/BMP7 2

GO:0070192 BP chromosome organization involved in meiotic cell cycle 2/1105  
59/162410.917323892 1 0.801260072 MEIKIN/MCMDC2 2

GO:2000514 BP regulation of CD4-positive, alpha-beta T cell activation 2/1105 59/16241  
0.917323892 1 0.801260072 CCL19/IL12B 2

GO:2000756 BP regulation of peptidyl-lysine acetylation 2/1105 59/162410.917323892  
1 0.801260072 MYOCD/NAP1L2 2

GO:0098656 BP anion transmembrane transport 14/1105 282/16241 0.917916051 1  
0.801260072  
ADAMTS8/ATP1A2/FOLR2/GABRA5/LRRC18/RGS4/SLC12A3/THBS1/CLCA4/FOLR1/GABRA4/  
SLC26A3/SLC6A7/SLC9A2 14

GO:0017038 BP protein import 9/1105 195/16241 0.920576019 1 0.801260072  
AGTR2/APOE/FLNA/GLI3/GPIHBP1/PRICKLE1/SIX2/CHP2/SIX3 9

GO:0009166 BP nucleotide catabolic process 8/1105 177/16241 0.920921253 1  
0.801260072 HTR2A/IGF1/NT5C1A/NUDT10/NUDT11/GDA/MLXIPL/XDH 8

GO:0010212 BP response to ionizing radiation 6/1105 140/16241 0.920994768 1  
0.801260072 CRYAB/PTPRC/SFRP1/SFRP2/VCAM1/APOBEC1 6

GO:0006458 BP 'de novo' protein folding 1/1105 36/162410.921094195 1 0.801260072  
DNAJB5 1

GO:0045823 BP positive regulation of heart contraction 1/1105 36/162410.921094195 1  
0.801260072 RGS4 1

GO:0051567 BP histone H3-K9 methylation 1/1105 36/162410.921094195 1  
0.801260072 PRDM12 1

GO:0051973 BP positive regulation of telomerase activity 1/1105 36/162410.921094195  
1 0.801260072 GREM1 1

GO:0071276 BP cellular response to cadmium ion 1/1105 36/162410.921094195 1  
0.801260072 CYBB 1

GO:0032606 BP type I interferon production 5/1105 121/16241 0.921097194 1  
0.801260072 LILRA4/PTPRS/TLR7/TLR8/TLR9 5

GO:0002287 BP alpha-beta T cell activation involved in immune response 2/1105  
60/162410.921904907 1 0.801260072 CCL19/IL12B 2

GO:0002293 BP alpha-beta T cell differentiation involved in immune response 2/1105  
60/162410.921904907 1 0.801260072 CCL19/IL12B 2

GO:0032922 BP circadian regulation of gene expression 2/1105 60/162410.921904907 1  
0.801260072 CARTPT/NGFR 2

GO:1903201 BP regulation of oxidative stress-induced cell death 2/1105 60/16241  
0.921904907 1 0.801260072 MMP3/NOX1 2

GO:0008630 BP intrinsic apoptotic signaling pathway in response to DNA damage 4/1105  
102/16241 0.922973903 1 0.801260072 CXCL12/HIC1/PHLDA3/SFRP2 4

GO:0051321 BP meiotic cell cycle 11/1105 232/16241 0.923781163 1 0.801260072  
CCNA1/DAZL/FMN2/HFM1/MEIKIN/NPPC/PDE3A/PTTG2/MCMDC2/OVOL1/SYCP3 11

GO:1901657 BP glycosyl compound metabolic process 6/1105 141/16241 0.924041718  
1 0.801260072 DPYS/NT5C1A/PTGDR/AKR1B10/AKR1C4/APOBEC1 6

GO:0051170 BP import into nucleus 7/1105 160/16241 0.924839145 1 0.801260072  
AGTR2/FLNA/GLI3/PRICKLE1/SIX2/CHP2/SIX3 7

GO:0031060 BP regulation of histone methylation 2/1105 61/16241 0.926246002 1  
0.801260072 CTCFL/PRDM12 2

GO:0046626 BP regulation of insulin receptor signaling pathway 2/1105 61/16241  
0.926246002 1 0.801260072 PRKCB/SORBS1 2

GO:0007041 BP lysosomal transport 4/1105 103/16241 0.92640251 1  
0.801260072 CACNG7/PCDHGA3/CDX2/PCSK9 4

GO:0046822 BP regulation of nucleocytoplasmic transport 4/1105 103/16241  
0.92640251 1 0.801260072 AGTR2/FLNA/GLI3/CHP24

GO:1902807 BP negative regulation of cell cycle G1/S phase transition 4/1105 103/16241  
0.92640251 1 0.801260072 DACT1/FHL1/GPNMB/C10orf99 4

GO:0006270 BP DNA replication initiation 1/1105 37/16241 0.92647469 1  
0.801260072 MCMDC2 1

GO:0007257 BP activation of JUN kinase activity 1/1105 37/16241 0.92647469 1  
0.801260072 CCL19 1

GO:0009225 BP nucleotide-sugar metabolic process 1/1105 37/16241 0.92647469 1  
0.801260072 GFPT2 1

GO:0031062 BP positive regulation of histone methylation 1/1105 37/16241 0.92647469  
1 0.801260072 PRDM12 1

GO:0032365 BP intracellular lipid transport 1/1105 37/16241 0.92647469 1  
0.801260072 PCSK9 1

GO:0043403 BP skeletal muscle tissue regeneration 1/1105 37/16241 0.92647469 1  
0.801260072 IGF1 1

GO:0061462 BP protein localization to lysosome 1/1105 37/16241 0.92647469 1  
0.801260072 CACNG7 1

GO:2000249 BP regulation of actin cytoskeleton reorganization 1/1105 37/16241  
0.92647469 1 0.801260072 CSF1R 1

GO:0002262 BP myeloid cell homeostasis 6/1105 142/16241 0.926985054 1  
0.801260072 AXL/CCR2/IKZF1/JAM3/TRIM58/EPO 6

GO:0003333 BP amino acid transmembrane transport 3/1105 83/16241 0.927823552 1  
0.801260072 ATP1A2/RGS4/SLC6A7 3

GO:0046916 BP cellular transition metal ion homeostasis 4/1105 104/16241  
0.929693045 1 0.801260072 CYBRD1/PRND/LCN2/TFR2 4

GO:0043280 BP positive regulation of cysteine-type endopeptidase activity involved in  
apoptotic process 5/1105 124/16241 0.930479813 1 0.801260072  
COL4A3/NGF/NGFR/KHDC1L/XDH 5

GO:0043470 BP regulation of carbohydrate catabolic process 3/1105 84/16241 0.931375325  
1 0.801260072 HTR2A/IGF1/MLXIPL 3

GO:0001825 BP blastocyst formation 1/1105 38/16241 0.931488604 1 0.801260072  
CDX2 1

GO:0019068 BP virion assembly 1/1105 38/16241 0.931488604 1 0.801260072

APOE 1  
 GO:0032350 BP regulation of hormone metabolic process 1/1105 38/162410.931488604  
 1 0.801260072 DUOXA2 1  
 GO:0035329 BP hippo signaling 1/1105 38/162410.931488604 1 0.801260072  
 WWTR1 1  
 GO:0043001 BP Golgi to plasma membrane protein transport 1/1105 38/16241  
 0.931488604 1 0.801260072 RAB31 1  
 GO:0050775 BP positive regulation of dendrite morphogenesis 1/1105 38/16241  
 0.931488604 1 0.801260072 RELN 1  
 GO:1900117 BP regulation of execution phase of apoptosis 1/1105 38/162410.931488604  
 1 0.801260072 PTGIS 1  
 GO:2000816 BP negative regulation of mitotic sister chromatid separation 1/1105  
 38/162410.931488604 1 0.801260072 PTTG2 1  
 GO:0035303 BP regulation of dephosphorylation 9/1105 200/16241 0.933036837 1  
 0.801260072  
 AGTR2/CCDC8/PDGFRB/PTPRC/CHP2/PPP1R14C/PPP1R14D/PPP1R1B/PPP1R27 9  
 GO:0055076 BP transition metal ion homeostasis 5/1105 125/16241 0.933378748 1  
 0.801260072 CYBRD1/PRND/HEPHL1/LCN2/TFR2 5  
 GO:0014823 BP response to activity2/1105 63/162410.93425361 1 0.801260072  
 ADIPOQ/PCK1 2  
 GO:0048713 BP regulation of oligodendrocyte differentiation 1/1105 39/16241  
 0.936160893 1 0.801260072 TENM4 1  
 GO:1901998 BP toxin transport 1/1105 39/162410.936160893 1 0.801260072  
 ANTXR1 1  
 GO:1905819 BP negative regulation of chromosome separation 1/1105 39/16241  
 0.936160893 1 0.801260072 PTTG2 1  
 GO:0019362 BP pyridine nucleotide metabolic process 8/1105 183/16241 0.936202315  
 1 0.801260072 FMO1/FMO2/HTR2A/IDO2/IGF1/PTGIS/MLXIPL/NOX18  
 GO:0046496 BP nicotinamide nucleotide metabolic process 8/1105 183/16241  
 0.936202315 1 0.801260072 FMO1/FMO2/HTR2A/IDO2/IGF1/PTGIS/MLXIPL/NOX18  
 GO:0071897 BP DNA biosynthetic process 8/1105 183/16241 0.936202315 1  
 0.801260072 ADIPOQ/FGF2/GREM1/KCNK2/NPPC/PDGFRB/SMOC2/TERT 8  
 GO:1901292 BP nucleoside phosphate catabolic process 8/1105 183/16241  
 0.936202315 1 0.801260072  
 HTR2A/IGF1/NT5C1A/NUDT10/NUDT11/GDA/MLXIPL/XDH 8  
 GO:1905475 BP regulation of protein localization to membrane 8/1105 183/16241  
 0.936202315 1 0.801260072 AR/CDH2/CLIP3/EPHA3/ITGB2/KCNB1/SORBS1/STAC 8  
 GO:0051091 BP positive regulation of DNA-binding transcription factor activity 12/1105  
 256/16241 0.9373175 1 0.801260072  
 ALK/AR/BEX1/CAMK2A/DDR2/EPHA5/ITGB2/MYOC/PRKCB/RELN/TLR9/NEUROD1 12  
 GO:0006305 BP DNA alkylation2/1105 64/162410.937941619 1 0.801260072  
 CTCFL/TDRD5 2  
 GO:0006306 BP DNA methylation 2/1105 64/162410.937941619 1 0.801260072  
 CTCFL/TDRD5 2

GO:0071242 BP cellular response to ammonium ion 2/1105 64/162410.937941619 1  
0.801260072 CHRM2/CHRNA3 2

GO:0099072 BP regulation of postsynaptic membrane neurotransmitter receptor levels  
2/1105 64/162410.937941619 1 0.801260072 CACNG7/FRRS1L 2

GO:0044728 BP DNA methylation or demethylation 3/1105 86/162410.938000678 1  
0.801260072 APOBEC1/CTCF1/TDRD5 3

GO:0034198 BP cellular response to amino acid starvation 1/1105 40/162410.940514813  
1 0.801260072 DAPL1 1

GO:0045746 BP negative regulation of Notch signaling pathway 1/1105 40/16241  
0.940514813 1 0.801260072 BMP7 1

GO:0046688 BP response to copper ion 1/1105 40/162410.940514813 1 0.801260072  
SOD3 1

GO:0060612 BP adipose tissue development 1/1105 40/162410.940514813 1  
0.801260072 EBF21

GO:0048002 BP antigen processing and presentation of peptide antigen 8/1105  
185/16241 0.940688016 1 0.801260072  
CYBB/FCGR2B/HLA-DOA/HLA-DPA1/HLA-DPB1/HLA-DQA1/HLA-DQA2/HLA-DQB2 8

GO:0006672 BP ceramide metabolic process 3/1105 87/162410.941086883 1  
0.801260072 ST8SIA2/ST8SIA6/FUT3 3

GO:2001022 BP positive regulation of response to DNA damage stimulus 3/1105  
87/162410.941086883 1 0.801260072 FGF10/FMN2/HIC1 3

GO:0000381 BP regulation of alternative mRNA splicing, via spliceosome 2/1105  
65/162410.941432716 1 0.801260072 CELF2/RBM24 2

GO:0048207 BP vesicle targeting, rough ER to cis-Golgi 2/1105 65/162410.941432716 1  
0.801260072 GRIA1/FOLR1 2

GO:0048208 BP COPII vesicle coating 2/1105 65/162410.941432716 1 0.801260072  
GRIA1/FOLR1 2

GO:0002831 BP regulation of response to biotic stimulus 5/1105 128/16241  
0.941437437 1 0.801260072 CRTAM/FGL2/IL12B/SYT11/HRG 5

GO:2001235 BP positive regulation of apoptotic signaling pathway 7/1105 167/16241  
0.942368917 1 0.801260072 AGTR2/PTPRC/SFRP1/THBS1/TIMP3/NOX1/RNF183 7

GO:0006497 BP protein lipidation 3/1105 88/162410.944030215 1 0.801260072  
CLIP3/ZDHHC11/ZDHHC11B 3

GO:0007129 BP synapsis 1/1105 41/162410.944572039 1 0.801260072 MCMDC2 1

GO:0033003 BP regulation of mast cell activation 1/1105 41/162410.944572039 1  
0.801260072 CNR1 1

GO:0033048 BP negative regulation of mitotic sister chromatid segregation 1/1105  
41/162410.944572039 1 0.801260072 PTTG2 1

GO:0071364 BP cellular response to epidermal growth factor stimulus 1/1105 41/16241  
0.944572039 1 0.801260072 COL1A1 1

GO:0090317 BP negative regulation of intracellular protein transport 1/1105 41/16241  
0.944572039 1 0.801260072 ADIPOQ 1

GO:1901985 BP positive regulation of protein acetylation 1/1105 41/162410.944572039  
1 0.801260072 NAP1L2 1

GO:1903573 BP negative regulation of response to endoplasmic reticulum stress 1/1105  
41/162410.944572039 1 0.801260072 MAGEA3 1

GO:0016239 BP positive regulation of macroautophagy 2/1105 66/162410.944736593 1  
0.801260072 DCN/HSPB8 2

GO:0030219 BP megakaryocyte differentiation 2/1105 66/162410.944736593 1  
0.801260072 MYL9/THBS1 2

GO:0046434 BP organophosphate catabolic process 11/1105 242/16241 0.944739013  
1 0.801260072  
HTR2A/IGF1/NT5C1A/NUDT10/NUDT11/APOA2/GDA/MLXIPL/PLA2G4E/PLA2G4F/XDH 11

GO:0051092 BP positive regulation of NF-kappaB transcription factor activity 6/1105  
149/16241 0.944915891 1 0.801260072 ALK/AR/CAMK2A/ITGB2/PRKCB/TLR9 6

GO:0006090 BP pyruvate metabolic process 6/1105 150/16241 0.947127192 1  
0.801260072 HTR2A/IGF1/AGXT/LDHC/MLXIPL/PCK16

GO:0032388 BP positive regulation of intracellular transport 9/1105 207/16241  
0.947615679 1 0.801260072  
ACTN2/CNR1/EHD2/FLNA/GLI3/ITGB2/KCNB1/NLGN1/CHP2 9

GO:0032869 BP cellular response to insulin stimulus 9/1105 207/16241 0.947615679  
1 0.801260072  
ADIPOQ/CPEB1/PRKCB/RAB31/SORBS1/APOBEC1/ATP6V1C2/PCK1/PCSK9 9

GO:0019915 BP lipid storage 2/1105 67/162410.947862536 1 0.801260072  
APOE/APOA1 2

GO:0050688 BP regulation of defense response to virus 2/1105 67/162410.947862536 1  
0.801260072 FGL2/IL12B 2

GO:0002832 BP negative regulation of response to biotic stimulus 1/1105 42/16241  
0.948352774 1 0.801260072 FGL2 1

GO:0006111 BP regulation of gluconeogenesis 1/1105 42/162410.948352774 1  
0.801260072 ADIPOQ 1

GO:0006378 BP mRNA polyadenylation 1/1105 42/162410.948352774 1 0.801260072  
CPEB1 1

GO:0033046 BP negative regulation of sister chromatid segregation 1/1105 42/16241  
0.948352774 1 0.801260072 PTTG2 1

GO:0043124 BP negative regulation of I-kappaB kinase/NF-kappaB signaling 1/1105  
42/162410.948352774 1 0.801260072 ADIPOQ 1

GO:0043486 BP histone exchange 1/1105 42/162410.948352774 1 0.801260072  
SYCP3 1

GO:0043631 BP RNA polyadenylation 1/1105 42/162410.948352774 1 0.801260072  
CPEB1 1

GO:0045197 BP establishment or maintenance of epithelial cell apical/basal polarity 1/1105  
42/162410.948352774 1 0.801260072 CDX2 1

GO:0060249 BP anatomical structure homeostasis 20/1105 403/16241 0.949095051 1  
0.801260072  
AKT3/ATP2B2/CARTPT/CCR2/CNR1/CSF1R/KRT1/MAP1A/SERPINA3/SLC6A2/TLR9/TMEM119  
/TUB/WWTR1/ADGRV1/IHH/MUC4/NEUROD1/TERT/USH1G 20

GO:0035710 BP CD4-positive, alpha-beta T cell activation 3/1105 90/162410.949511479

1 0.801260072 CCL19/IL12B/PLA2G2D 3  
 GO:2001169 BP regulation of ATP biosynthetic process 3/1105 90/162410.949511479 1  
 0.801260072 HTR2A/IGF1/MLXIPL 3  
 GO:0043254 BP regulation of protein complex assembly 22/1105 438/16241  
 0.950008925 1 0.801260072  
 ADD2/APOE/CCL21/CCR7/CLIP3/CRYAB/CXCL13/DACT1/DKK1/ELN/FMN2/LMOD1/MAGEL2/  
 NAV3/P2RY12/SELP/SLIT2/STMN2/TCL1A/CDH17/HRG/MMP3 22  
 GO:0070227 BP lymphocyte apoptotic process 2/1105 68/162410.950819435 1  
 0.801260072 CLC/GLI3 2  
 GO:2001242 BP regulation of intrinsic apoptotic signaling pathway 6/1105 152/16241  
 0.951312252 1 0.801260072 CXCL12/SFRP2/EPO/MAGEA3/NOX1/RNF183 6  
 GO:0002204 BP somatic recombination of immunoglobulin genes involved in immune  
 response 1/1105 43/162410.951875842 1 0.801260072 PTPRC 1  
 GO:0002208 BP somatic diversification of immunoglobulins involved in immune response  
 1/1105 43/162410.951875842 1 0.801260072 PTPRC 1  
 GO:0044003 BP modification by symbiont of host morphology or physiology 1/1105  
 43/162410.951875842 1 0.801260072 DEFA1 1  
 GO:0045190 BP isotype switching 1/1105 43/162410.951875842 1 0.801260072  
 PTPRC 1  
 GO:0045540 BP regulation of cholesterol biosynthetic process 1/1105 43/16241  
 0.951875842 1 0.801260072 APOE 1  
 GO:0051985 BP negative regulation of chromosome segregation 1/1105 43/16241  
 0.951875842 1 0.801260072 PTTG2 1  
 GO:0072348 BP sulfur compound transport 1/1105 43/162410.951875842 1  
 0.801260072 SLC26A3 1  
 GO:0106118 BP regulation of sterol biosynthetic process 1/1105 43/162410.951875842  
 1 0.801260072 APOE 1  
 GO:1990928 BP response to amino acid starvation 1/1105 43/162410.951875842 1  
 0.801260072 DAPL1 1  
 GO:0006903 BP vesicle targeting 3/1105 91/162410.952060566 1 0.801260072  
 GRIA1/NLGN1/FOLR1 3  
 GO:0051196 BP regulation of coenzyme metabolic process 3/1105 91/162410.952060566  
 1 0.801260072 HTR2A/IGF1/MLXIPL 3  
 GO:1900542 BP regulation of purine nucleotide metabolic process 5/1105 133/16241  
 0.952935076 1 0.801260072 HTR2A/IGF1/GUCA2A/MLXIPL/PDZD3 5  
 GO:0051650 BP establishment of vesicle localization 13/1105 283/16241 0.952945709  
 1 0.801260072  
 CAMK2A/CHRM2/CHRNA6/CNR1/GRIA1/GRIK5/HTR2A/NLGN1/PRKCB/SNAP91/SYT11/SYT4  
 /FOLR1 13  
 GO:0006901 BP vesicle coating 2/1105 69/162410.953615797 1 0.801260072  
 GRIA1/FOLR1 2  
 GO:1900076 BP regulation of cellular response to insulin stimulus 2/1105 69/16241  
 0.953615797 1 0.801260072 PRKCB/SORBS1 2  
 GO:0033135 BP regulation of peptidyl-serine phosphorylation 5/1105 134/16241

0.954972159 1 0.801260072 DKK1/NTRK2/SFRP2/TCL1A/MLXIPL 5  
 GO:0010799 BP regulation of peptidyl-threonine phosphorylation 1/1105 44/16241  
 0.95515879 1 0.801260072 BMP7 1  
 GO:0042771 BP intrinsic apoptotic signaling pathway in response to DNA damage by p53 class  
 mediator 1/1105 44/16241 0.95515879 1 0.801260072 PHLDA3 1  
 GO:0043330 BP response to exogenous dsRNA 1/1105 44/16241 0.95515879 1  
 0.801260072 COLEC12 1  
 GO:0045646 BP regulation of erythrocyte differentiation 1/1105 44/16241 0.95515879  
 1 0.801260072 TRIM58 1  
 GO:0007050 BP cell cycle arrest 10/1105 230/16241 0.955312745 1 0.801260072  
 BRINP3/FGF10/GAS1/GAS7/HEPACAM/IL12B/RPRM/THBS1/MLXIPL/NEUROD1 10  
 GO:2000736 BP regulation of stem cell differentiation 4/1105 114/16241 0.955975708  
 1 0.801260072 LMO1/PRICKLE1/RBM24/BMP7 4  
 GO:0032886 BP regulation of microtubule-based process 9/1105 212/16241  
 0.956241245 1 0.801260072  
 ARMC4/CLIP3/EPHA3/MAP1A/NAV3/STMN2/STMN4/TRIM58/STMND1 9  
 GO:0032024 BP positive regulation of insulin secretion 2/1105 70/16241 0.956259753 1  
 0.801260072 BLK/RFX6 2  
 GO:0046128 BP purine ribonucleoside metabolic process 2/1105 70/16241 0.956259753  
 1 0.801260072 NT5C1A/PTGDR 2  
 GO:0072527 BP pyrimidine-containing compound metabolic process 3/1105 93/16241  
 0.956802175 1 0.801260072 DPYS/NT5C1A/APOBEC1 3  
 GO:0006109 BP regulation of carbohydrate metabolic process 8/1105 194/16241  
 0.95761146 1 0.801260072  
 ADCYAP1R1/ADIPOQ/HTR2A/IGF1/IGFBP4/SORBS1/FOXA2/MLXIPL 8  
 GO:0051054 BP positive regulation of DNA metabolic process 9/1105 213/16241  
 0.957806369 1 0.801260072  
 FGF10/FGF2/FGFR1/FMN2/GLI2/GREM1/PDGFRB/PTPRC/SMOC2 9  
 GO:0035088 BP establishment or maintenance of apical/basal cell polarity 1/1105  
 45/16241 0.95821797 1 0.801260072 CDX2 1  
 GO:0061245 BP establishment or maintenance of bipolar cell polarity 1/1105 45/16241  
 0.95821797 1 0.801260072 CDX2 1  
 GO:0070849 BP response to epidermal growth factor 1/1105 45/16241 0.95821797 1  
 0.801260072 COL1A1 1  
 GO:0006334 BP nucleosome assembly 2/1105 71/16241 0.958759073 1 0.801260072  
 NAP1L2/NAP1L3 2  
 GO:0090114 BP COPII-coated vesicle budding 2/1105 71/16241 0.958759073 1  
 0.801260072 GRIA1/FOLR1 2  
 GO:2001021 BP negative regulation of response to DNA damage stimulus 2/1105  
 71/16241 0.958759073 1 0.801260072 CXCL12/SFRP2 2  
 GO:0030148 BP sphingolipid biosynthetic process 3/1105 94/16241 0.959004775 1  
 0.801260072 ST6GALNAC5/ST8SIA2/ST8SIA6 3  
 GO:0031334 BP positive regulation of protein complex assembly 11/1105 251/16241  
 0.959115406 1 0.801260072

CCL21/CCR7/CXCL13/FMN2/LMOD1/MAGEL2/NAV3/P2RY12/TCL1A/CDH17/MMP3 11  
 GO:0030705 BP cytoskeleton-dependent intracellular transport 7/1105 176/16241  
 0.959530848 1 0.801260072 MAP1A/NEFL/TRIM58/TUB/TUBA1A/UCLH1/ACTL8 7  
 GO:0006661 BP phosphatidylinositol biosynthetic process 4/1105 116/16241  
 0.959998481 1 0.801260072 FGF2/HTR2A/PI4K2B/HTR2C 4  
 GO:0042866 BP pyruvate biosynthetic process 4/1105 116/16241 0.959998481 1  
 0.801260072 HTR2A/IGF1/AGXT/MLXIPL 4  
 GO:0030522 BP intracellular receptor signaling pathway 12/1105 270/16241  
 0.960066524 1 0.801260072  
 AR/CYP7B1/HEYL/PTGIS/RORB/RXRG/SFRP1/TGFB1I1/DEFA1/FOXH1/NR1I2/SCGB2A1 12  
 GO:0010970 BP transport along microtubule 6/1105 157/16241 0.960498644 1  
 0.801260072 MAP1A/NEFL/TRIM58/TUB/UCLH1/ACTL8 6  
 GO:0099111 BP microtubule-based transport 6/1105 157/16241 0.960498644 1  
 0.801260072 MAP1A/NEFL/TRIM58/TUB/UCLH1/ACTL8 6  
 GO:0006140 BP regulation of nucleotide metabolic process 5/1105 137/16241  
 0.960610064 1 0.801260072 HTR2A/IGF1/GUCA2A/MLXIPL/PDZD3 5  
 GO:0051205 BP protein insertion into membrane 1/1105 46/16241 0.961068621 1  
 0.801260072 RTP5 1  
 GO:0072666 BP establishment of protein localization to vacuole 1/1105 46/16241  
 0.961068621 1 0.801260072 CACNG7 1  
 GO:0090199 BP regulation of release of cytochrome c from mitochondria 1/1105  
 46/16241 0.961068621 1 0.801260072 IGF1 1  
 GO:0000079 BP regulation of cyclin-dependent protein serine/threonine kinase activity  
 3/1105 95/16241 0.961101667 1 0.801260072 CCNA1/MYOCN/CNTD2 3  
 GO:0009119 BP ribonucleoside metabolic process 3/1105 95/16241 0.961101667 1  
 0.801260072 NT5C1A/PTGDR/APOBEC1 3  
 GO:0090630 BP activation of GTPase activity 3/1105 95/16241 0.961101667 1  
 0.801260072 CCL21/CCR7/CXCL13 3  
 GO:0031647 BP regulation of protein stability 12/1105 271/16241 0.961369597 1  
 0.801260072  
 ANK2/CRYAB/DACT1/FLNA/GPIHBP1/IGF1/A1CF/ADGRV1/APOA1/APOA2/DSG1/TERT 12  
 GO:0009314 BP response to radiation 21/1105 431/16241 0.96178228 1  
 0.801260072  
 ATP1A2/CCR4/COL3A1/CRYAB/CXCL12/ELANE/GPR88/IL12B/MFAP4/NETO1/PENK/PTPRC/SF  
 RP1/SFRP2/VCAM1/APOBEC1/GNGT1/PPP1R1B/REEP6/RGR/SERPINB13 21  
 GO:0008654 BP phospholipid biosynthetic process 11/1105 253/16241 0.961819539 1  
 0.801260072  
 CHAT/FGF2/HTR2A/PCYT1B/PI4K2B/PLA2G2D/ALPI/APOA1/APOA2/HTR2C/PLA2G2F 11  
 GO:0034101 BP erythrocyte homeostasis 4/1105 117/16241 0.961879696 1  
 0.801260072 AXL/IKZF1/TRIM58/EPO 4  
 GO:0019674 BP NAD metabolic process 2/1105 73/16241 0.963353144 1 0.801260072  
 IDO2/PTGIS 2  
 GO:0042278 BP purine nucleoside metabolic process 2/1105 73/16241 0.963353144 1  
 0.801260072 NT5C1A/PTGDR 2

GO:0048199 BP vesicle targeting, to, from or within Golgi 2/1105 73/162410.963353144  
1 0.801260072 GRIA1/FOLR1 2

GO:0009116 BP nucleoside metabolic process 4/1105 118/16241 0.96367858 1  
0.801260072 DPYS/NT5C1A/PTGDR/APOBEC1 4

GO:0006120 BP mitochondrial electron transport, NADH to ubiquinone 1/1105  
47/162410.963724946 1 0.801260072 NDUFC2-KCTD14 1

GO:0045747 BP positive regulation of Notch signaling pathway 1/1105 47/16241  
0.963724946 1 0.801260072 FGF10 1

GO:0046854 BP phosphatidylinositol phosphorylation 1/1105 47/162410.963724946 1  
0.801260072 PI4K2B 1

GO:2000059 BP negative regulation of ubiquitin-dependent protein catabolic process 1/1105  
47/162410.963724946 1 0.801260072 MAP1A 1

GO:0044843 BP cell cycle G1/S phase transition 11/1105 255/16241 0.964363394 1  
0.801260072  
ADAMTS1/CAMK2A/CCNA1/DACT1/FGF10/FHL1/GPNMB/KCNA5/C10orf99/TERT/TRIM71  
11

GO:0006733 BP oxidoreduction coenzyme metabolic process 8/1105 199/16241  
0.965014842 1 0.801260072 FMO1/FMO2/HTR2A/IDO2/IGF1/PTGIS/MLXIPL/NOX18

GO:1902930 BP regulation of alcohol biosynthetic process 2/1105 74/162410.965461729  
1 0.801260072 ADCYAP1R1/APOE 2

GO:0007062 BP sister chromatid cohesion 1/1105 48/162410.966200179 1  
0.801260072 MEIKIN 1

GO:0009409 BP response to cold 1/1105 48/162410.966200179 1 0.801260072  
P2RX3 1

GO:0016447 BP somatic recombination of immunoglobulin gene segments 1/1105  
48/162410.966200179 1 0.801260072 PTPRC 1

GO:0051972 BP regulation of telomerase activity 1/1105 48/162410.966200179 1  
0.801260072 GREM1 1

GO:1905268 BP negative regulation of chromatin organization 1/1105 48/16241  
0.966200179 1 0.801260072 APOBEC1 1

GO:0018209 BP peptidyl-serine modification 14/1105 312/16241 0.96679267 1  
0.801260072  
AKT3/BGN/CAMK2A/DCLK1/DCN/DKK1/MGAT5B/NTRK2/PRKCB/SFRP2/SPOCK3/TCL1A/EPO  
/MLXIPL 14

GO:2001056 BP positive regulation of cysteine-type endopeptidase activity 5/1105  
141/16241 0.967121453 1 0.801260072 COL4A3/NGF/NGFR/KHDC1L/XDH 5

GO:1903829 BP positive regulation of cellular protein localization 14/1105 313/16241  
0.967839151 1 0.801260072  
CLIP3/EPHA3/FLNA/GLI3/ITGB2/KCNB1/MAP1A/NGFR/SORBS1/STAC/SYT11/CHP2/F2/TERT  
14

GO:0070507 BP regulation of microtubule cytoskeleton organization 7/1105 182/16241  
0.968253172 1 0.801260072 CLIP3/EPHA3/MAP1A/NAV3/STMN2/STMN4/STMND1  
7

GO:0045744 BP negative regulation of G protein-coupled receptor signaling pathway 1/1105

49/162410.968506658 1 0.801260072 RGS4 1  
 GO:0006900 BP vesicle budding from membrane 3/1105 99/162410.968521818 1  
 0.801260072 GRIA1/SNAP91/FOLR1 3  
 GO:1904029 BP regulation of cyclin-dependent protein kinase activity 3/1105 99/16241  
 0.968521818 1 0.801260072 CCNA1/MYOCD/CNTD2 3  
 GO:0019359 BP nicotinamide nucleotide biosynthetic process 5/1105 142/16241  
 0.968586285 1 0.801260072 HTR2A/IDO2/IGF1/PTGIS/MLXIPL 5  
 GO:0019363 BP pyridine nucleotide biosynthetic process 5/1105 142/16241  
 0.968586285 1 0.801260072 HTR2A/IDO2/IGF1/PTGIS/MLXIPL 5  
 GO:0000082 BP G1/S transition of mitotic cell cycle 10/1105 240/16241 0.968699195  
 1 0.801260072  
 ADAMTS1/CAMK2A/CCNA1/DACT1/FGF10/FHL1/GPNMB/KCNA5/TERT/TRIM71 10  
 GO:0019318 BP hexose metabolic process 10/1105 240/16241 0.968699195 1  
 0.801260072 ADIPOQ/IGF1/IGFBP4/NPY1R/PGM5/SORBS1/FBP2/FOXA2/G6PC/PCK1 10  
 GO:0000380 BP alternative mRNA splicing, via spliceosome 2/1105 76/162410.969334198  
 1 0.801260072 CELF2/RBM24 2  
 GO:0051783 BP regulation of nuclear division 7/1105 183/16241 0.969527922 1  
 0.801260072 CCDC8/DAZL/IGF1/PDE3A/PDGFRB/PTTG2/BMP7 7  
 GO:0035335 BP peptidyl-tyrosine dephosphorylation 3/1105 100/16241 0.970155993  
 1 0.801260072 PTPRC/PTPRN/PTPRS 3  
 GO:2000134 BP negative regulation of G1/S transition of mitotic cell cycle 3/1105  
 100/16241 0.970155993 1 0.801260072 DACT1/FHL1/GPNMB 3  
 GO:0009066 BP aspartate family amino acid metabolic process 1/1105 50/16241  
 0.970655876 1 0.801260072 BHMT2 1  
 GO:0033059 BP cellular pigmentation 1/1105 50/162410.970655876 1 0.801260072  
 ZEB2 1  
 GO:0072698 BP protein localization to microtubule cytoskeleton 1/1105 50/16241  
 0.970655876 1 0.801260072 MAP1A 1  
 GO:0043902 BP positive regulation of multi-organism process 7/1105 184/16241  
 0.970755765 1 0.801260072 APOE/CSF1R/FCER2/PDE3A/VIP/PGLYRP3/PGLYRP4 7  
 GO:0071478 BP cellular response to radiation 7/1105 184/16241 0.970755765 1  
 0.801260072 CRYAB/GPR88/MFAP4/SFRP1/SFRP2/GNGT1/RGR 7  
 GO:0006997 BP nucleus organization 4/1105 123/16241 0.971546995 1  
 0.801260072 PRKCB/SYNE1/SUN3/SYCP3 4  
 GO:0072525 BP pyridine-containing compound biosynthetic process 5/1105 145/16241  
 0.972626425 1 0.801260072 HTR2A/IDO2/IGF1/PTGIS/MLXIPL 5  
 GO:0043331 BP response to dsRNA 1/1105 51/162410.972658548 1 0.801260072  
 COLEC12 1  
 GO:0045815 BP positive regulation of gene expression, epigenetic 1/1105 51/16241  
 0.972658548 1 0.801260072 APOBEC1 1  
 GO:0051452 BP intracellular pH reduction 1/1105 51/162410.972658548 1  
 0.801260072 ATP6V1C2 1  
 GO:0061512 BP protein localization to cilium 1/1105 51/162410.972658548 1  
 0.801260072 TUB 1

GO:1901799 BP negative regulation of proteasomal protein catabolic process 1/1105  
51/162410.972658548 1 0.801260072 MAP1A 1

GO:0006487 BP protein N-linked glycosylation 2/1105 78/162410.972786507 1  
0.801260072 GFPT2/MGAT5B 2

GO:0010507 BP negative regulation of autophagy 2/1105 78/162410.972786507 1  
0.801260072 IL10RA/DAPL1 2

GO:0071482 BP cellular response to light stimulus 4/1105 124/16241 0.972915901 1  
0.801260072 GPR88/MFAP4/GNGT1/RGR 4

GO:0007163 BP establishment or maintenance of cell polarity 8/1105 206/16241  
0.973420444 1 0.801260072 CCL19/CCL21/CCR7/FGF10/JAM3/ACTL8/CDX2/RHOV 8

GO:0006446 BP regulation of translational initiation 2/1105 79/162410.974368839 1  
0.801260072 C8orf88/DAZL 2

GO:0033238 BP regulation of cellular amine metabolic process 2/1105 79/16241  
0.974368839 1 0.801260072 ATCAY/ITGB2 2

GO:0048194 BP Golgi vesicle budding 2/1105 79/162410.974368839 1 0.801260072  
GRIA1/FOLR1 2

GO:0090559 BP regulation of membrane permeability 2/1105 79/162410.974368839 1  
0.801260072 CAMK2A/HEG1 2

GO:1903533 BP regulation of protein targeting 2/1105 79/162410.974368839 1  
0.801260072 ITGB2/KCNB1 2

GO:0051568 BP histone H3-K4 methylation 1/1105 52/162410.974524657 1  
0.801260072 CTCFL 1

GO:0070830 BP bicellular tight junction assembly 1/1105 52/162410.974524657 1  
0.801260072 PECAM1 1

GO:0090329 BP regulation of DNA-dependent DNA replication 1/1105 52/16241  
0.974524657 1 0.801260072 FGFR1 1

GO:1902017 BP regulation of cilium assembly 1/1105 52/162410.974524657 1  
0.801260072 NOTO 1

GO:0034968 BP histone lysine methylation 3/1105 103/16241 0.974590033 1  
0.801260072 SMYD1/CTCFL/PRDM12 3

GO:0022900 BP electron transport chain 6/1105 168/16241 0.975408142 1  
0.801260072 AOX1/CYBB/NDUFC2-KCTD14/AKR1C4/COX7B2/XDH 6

GO:0043547 BP positive regulation of GTPase activity 18/1105 394/16241 0.97567357  
1 0.801260072  
ADCYAP1/ADGRB3/ARHGAP20/ARHGAP31/CCL13/CCL14/CCL19/CCL21/CCR7/CXCL13/GNAO  
1/RANBP3L/RGS4/SFRP1/THY1/CCL15/CCL20/GRHL3 18

GO:1903321 BP negative regulation of protein modification by small protein conjugation or  
removal 2/1105 80/162410.975862084 1 0.801260072 MAGEA2/MAGEA2B 2

GO:0006275 BP regulation of DNA replication 3/1105 104/16241 0.975923607 1  
0.801260072 FGF10/FGFR1/GLI2 3

GO:0033138 BP positive regulation of peptidyl-serine phosphorylation 3/1105 104/16241  
0.975923607 1 0.801260072 NTRK2/SFRP2/TCL1A 3

GO:0071156 BP regulation of cell cycle arrest 3/1105 104/16241 0.975923607 1  
0.801260072 FGF10/MLXIPL/NEUROD1 3

GO:0042073 BP intraciliary transport 1/1105 53/162410.976263507 1 0.801260072  
TUB 1

GO:0043392 BP negative regulation of DNA binding 1/1105 53/162410.976263507 1  
0.801260072 HAND2 1

GO:0045851 BP pH reduction 1/1105 53/162410.976263507 1 0.801260072  
ATP6V1C2 1

GO:0061951 BP establishment of protein localization to plasma membrane 1/1105  
53/162410.976263507 1 0.801260072 RAB31 1

GO:0120192 BP tight junction assembly 1/1105 53/162410.976263507 1 0.801260072  
PECAM1 1

GO:0043624 BP cellular protein complex disassembly 8/1105 210/16241 0.977351679  
1 0.801260072 ACTN2/ADD2/LMOD1/MAP1A/NAV3/STMN2/STMN4/STMND1 8

GO:0006383 BP transcription by RNA polymerase III 1/1105 54/162410.977883771 1  
0.801260072 AR 1

GO:0010823 BP negative regulation of mitochondrion organization 1/1105 54/16241  
0.977883771 1 0.801260072 IGF1 1

GO:0090316 BP positive regulation of intracellular protein transport 5/1105 150/16241  
0.978304461 1 0.801260072 FLNA/GLI3/ITGB2/KCNB1/CHP2 5

GO:0051225 BP spindle assembly 3/1105 106/16241 0.97839374 1 0.801260072  
CCDC69/FLNA/GOLGA80 3

GO:0016445 BP somatic diversification of immunoglobulins 1/1105 55/162410.979393528  
1 0.801260072 PTPRC 1

GO:0035082 BP axoneme assembly 1/1105 55/162410.979393528 1 0.801260072  
ARMC4 1

GO:0090307 BP mitotic spindle assembly 1/1105 55/162410.979393528 1  
0.801260072 FLNA 1

GO:0006664 BP glycolipid metabolic process 3/1105 107/16241 0.979536384 1  
0.801260072 ST6GALNAC5/ST8SIA2/ST8SIA6 3

GO:0060147 BP regulation of posttranscriptional gene silencing 2/1105 83/16241  
0.979853954 1 0.801260072 TERT/TRIM71 2

GO:0060218 BP hematopoietic stem cell differentiation 2/1105 83/162410.979853954 1  
0.801260072 LMO1/SFRP1 2

GO:0060966 BP regulation of gene silencing by RNA 2/1105 83/162410.979853954 1  
0.801260072 TERT/TRIM71 2

GO:0051053 BP negative regulation of DNA metabolic process 4/1105 130/16241  
0.979915625 1 0.801260072 ADIPOQ/KCNK2/NPPC/APOBEC1 4

GO:0006304 BP DNA modification 3/1105 108/16241 0.98062126 1 0.801260072  
APOBEC1/CTCF/TDRD5 3

GO:0034728 BP nucleosome organization 3/1105 108/16241 0.98062126 1  
0.801260072 NAP1L2/NAP1L3/SYCP3 3

GO:0060968 BP regulation of gene silencing 3/1105 108/16241 0.98062126 1  
0.801260072 APOBEC1/TERT/TRIM71 3

GO:1903509 BP liposaccharide metabolic process 3/1105 108/16241 0.98062126 1  
0.801260072 ST6GALNAC5/ST8SIA2/ST8SIA6 3

GO:0000245 BP spliceosomal complex assembly 1/1105 56/162410.980800308 1  
 0.801260072 CELF2 1  
 GO:0010965 BP regulation of mitotic sister chromatid separation 1/1105 56/16241  
 0.980800308 1 0.801260072 PTTG2 1  
 GO:0090181 BP regulation of cholesterol metabolic process 1/1105 56/162410.980800308  
 1 0.801260072 APOE 1  
 GO:0097194 BP execution phase of apoptosis 2/1105 84/162410.98103636 1  
 0.801260072 PTGIS/XKR4 2  
 GO:0097193 BP intrinsic apoptotic signaling pathway 11/1105 273/16241 0.981265707  
 1 0.801260072  
 CXCL12/CYP1B1/HIC1/LGALS12/PHLDA3/SFRP2/EPO/MAGEA3/NOX1/RNF183/RNF186 11  
 GO:0030218 BP erythrocyte differentiation 3/1105 109/16241 0.981651102 1  
 0.801260072 IKZF1/TRIM58/EPO 3  
 GO:0031398 BP positive regulation of protein ubiquitination 3/1105 109/16241  
 0.981651102 1 0.801260072 PRICKLE1/MAGEA2/MAGEA2B 3  
 GO:0001836 BP release of cytochrome c from mitochondria 1/1105 57/162410.982111131  
 1 0.801260072 IGF1 1  
 GO:0002562 BP somatic diversification of immune receptors via germline recombination  
 within a single locus 1/1105 57/162410.982111131 1 0.801260072 PTPRC 1  
 GO:0016444 BP somatic cell DNA recombination 1/1105 57/162410.982111131 1  
 0.801260072 PTPRC 1  
 GO:0031663 BP lipopolysaccharide-mediated signaling pathway 1/1105 57/16241  
 0.982111131 1 0.801260072 BPI 1  
 GO:0018022 BP peptidyl-lysine methylation 3/1105 110/16241 0.982628528 1  
 0.801260072 SMYD1/CTCFL/PRDM12 3  
 GO:0006323 BP DNA packaging 4/1105 133/16241 0.982738276 1 0.801260072  
 NAP1L2/NAP1L3/BANF2/SYCP3 4  
 GO:0034404 BP nucleobase-containing small molecule biosynthetic process 8/1105  
 217/16241 0.982971192 1 0.801260072  
 HTR2A/IGF1/NT5C1A/NUDT10/NUDT11/GDA/MLXIPL/XDH 8  
 GO:0051304 BP chromosome separation 2/1105 86/162410.983202525 1 0.801260072  
 HFM1/PTTG2 2  
 GO:0006360 BP transcription by RNA polymerase I 1/1105 58/162410.983332534 1  
 0.801260072 FLNA 1  
 GO:0043966 BP histone H3 acetylation 1/1105 58/162410.983332534 1 0.801260072  
 NAP1L2 1  
 GO:0006754 BP ATP biosynthetic process 4/1105 134/16241 0.983592618 1  
 0.801260072 HTR2A/IGF1/LDHC/MLXIPL 4  
 GO:1903364 BP positive regulation of cellular protein catabolic process 4/1105  
 134/16241 0.983592618 1 0.801260072 APOE/DACT1/PRICKLE1/PCSK9 4  
 GO:0050810 BP regulation of steroid biosynthetic process 2/1105 87/162410.984193481  
 1 0.801260072 APOE/DHH 2  
 GO:0038093 BP Fc receptor signaling pathway 6/1105 178/16241 0.984258262 1  
 0.801260072 FCER1A/FCGR2B/FCGR3A/LILRA4/PTPRC/WIPF1 6

GO:0006096 BP glycolytic process 3/1105 112/16241 0.98443605 1 0.801260072  
HTR2A/IGF1/MLXIPL 3

GO:0033260 BP nuclear DNA replication 1/1105 59/162410.984470615 1 0.801260072  
FGFR1 1

GO:0045576 BP mast cell activation 1/1105 59/162410.984470615 1 0.801260072  
CNR1 1

GO:0051306 BP mitotic sister chromatid separation 1/1105 59/162410.984470615 1  
0.801260072 PTTG2 1

GO:1902108 BP regulation of mitochondrial membrane permeability involved in apoptotic  
process 1/1105 59/162410.984470615 1 0.801260072 CAMK2A 1

GO:0009896 BP positive regulation of catabolic process 18/1105 409/16241 0.984691256  
1 0.801260072  
APOE/ASB5/DACT1/DCN/HSPB8/HTR2A/IGF1/PRICKLE1/RBM24/VIP/APOA2/APOA4/APOA5/  
C4BPB/FABP1/MLXIPL/PCSK9/TRIM71 18

GO:0045862 BP positive regulation of proteolysis 14/1105 336/16241 0.985061264 1  
0.801260072  
ANTXR1/APOE/COL4A3/CR1/FBLN1/FN1/NGF/NGFR/PRICKLE1/SFRP2/SPON1/KHDC1L/SEM  
G1/XDH 14

GO:0006906 BP vesicle fusion 2/1105 88/162410.98512751 1 0.801260072  
GRIK5/SYT4 2

GO:0031058 BP positive regulation of histone modification 2/1105 88/162410.98512751  
1 0.801260072 NAP1L2/PRDM12 2

GO:0033209 BP tumor necrosis factor-mediated signaling pathway 5/1105 158/16241  
0.985154088 1 0.801260072 ADIPOQ/CLIP3/TNFRSF13B/TNFSF8/APOA1 5

GO:0009411 BP response to UV 4/1105 136/16241 0.985182543 1 0.801260072  
ELANE/IL12B/MFAP4/SERPINB13 4

GO:0006757 BP ATP generation from ADP 3/1105 113/16241 0.985270837 1  
0.801260072 HTR2A/IGF1/MLXIPL 3

GO:1903578 BP regulation of ATP metabolic process 3/1105 113/16241 0.985270837  
1 0.801260072 HTR2A/IGF1/MLXIPL 3

GO:0007088 BP regulation of mitotic nuclear division 5/1105 159/16241 0.985850343  
1 0.801260072 CCDC8/IGF1/PDGFRB/PTTG2/BMP7 5

GO:0048284 BP organelle fusion 3/1105 114/16241 0.986062597 1 0.801260072  
GRIK5/PCDHGA3/SYT4 3

GO:0006521 BP regulation of cellular amino acid metabolic process 1/1105 61/16241  
0.986519134 1 0.801260072 ATCAY 1

GO:0006893 BP Golgi to plasma membrane transport 1/1105 61/162410.986519134 1  
0.801260072 RAB31 1

GO:0007040 BP lysosome organization 1/1105 61/162410.986519134 1 0.801260072  
CLVS2 1

GO:0043297 BP apical junction assembly 1/1105 61/162410.986519134 1 0.801260072  
PECAM1 1

GO:0046834 BP lipid phosphorylation 1/1105 61/162410.986519134 1 0.801260072  
PI4K2B 1

GO:0080171 BP lytic vacuole organization 1/1105 61/162410.986519134 1  
 0.801260072 CLVS2 1  
 GO:1905818 BP regulation of chromosome separation 1/1105 61/162410.986519134 1  
 0.801260072 PTTG2 1  
 GO:0007034 BP vacuolar transport 4/1105 138/16241 0.986625475 1 0.801260072  
 CACNG7/PCDHGA3/CDX2/PCSK9 4  
 GO:0031056 BP regulation of histone modification 4/1105 138/16241 0.986625475 1  
 0.801260072 MYOCD/NAP1L2/CTCF/PRDM12 4  
 GO:0002702 BP positive regulation of production of molecular mediator of immune response  
 2/1105 90/162410.986837224 1 0.801260072 PTPRC/TLR9 2  
 GO:0031497 BP chromatin assembly 2/1105 90/162410.986837224 1 0.801260072  
 NAP1L2/NAP1L3 2  
 GO:0032006 BP regulation of TOR signaling 2/1105 90/162410.986837224 1  
 0.801260072 AKT3/RELN 2  
 GO:0003341 BP cilium movement 1/1105 62/162410.987439799 1 0.801260072  
 ARMC4 1  
 GO:0036498 BP IRE1-mediated unfolded protein response 1/1105 62/162410.987439799  
 1 0.801260072 EXTL1 1  
 GO:0072665 BP protein localization to vacuole 1/1105 62/162410.987439799 1  
 0.801260072 CACNG7 1  
 GO:0000045 BP autophagosome assembly 2/1105 91/162410.987618722 1  
 0.801260072 MAP1LC3C/SYNPO2 2  
 GO:0006367 BP transcription initiation from RNA polymerase II promoter 6/1105  
 184/16241 0.988031864 1 0.801260072 AR/RORB/RXRG/WWTR1/NR1I2/NR2E1  
 6  
 GO:0045732 BP positive regulation of protein catabolic process 7/1105 205/16241  
 0.988055329 1 0.801260072 APOE/ASB5/DACT1/PRICKLE1/VIP/C4BPB/PCSK9 7  
 GO:0071806 BP protein transmembrane transport 1/1105 63/162410.988297641 1  
 0.801260072 GPIHBP1 1  
 GO:0090174 BP organelle membrane fusion 2/1105 93/162410.989048403 1  
 0.801260072 GRIK5/SYT4 2  
 GO:0033047 BP regulation of mitotic sister chromatid segregation 1/1105 64/16241  
 0.989096943 1 0.801260072 PTTG2 1  
 GO:2000779 BP regulation of double-strand break repair 1/1105 64/162410.989096943  
 1 0.801260072 FMN2 1  
 GO:0031123 BP RNA 3'-end processing 4/1105 142/16241 0.989120215 1  
 0.801260072 CPEB1/CT45A10/CT45A5/LIN28B 4  
 GO:0006164 BP purine nucleotide biosynthetic process 10/1105 268/16241 0.989199103  
 1 0.801260072  
 ADCY2/ADCY5/HTR2A/IGF1/NPPC/GUCA2A/GUCY2C/LDHC/MLXIPL/PDZD3 10  
 GO:0008593 BP regulation of Notch signaling pathway 2/1105 94/162410.989701525 1  
 0.801260072 FGF10/BMP7 2  
 GO:1905037 BP autophagosome organization 2/1105 94/162410.989701525 1  
 0.801260072 MAP1LC3C/SYNPO2 2

GO:0002200 BP somatic diversification of immune receptors 1/1105 65/162410.989841696  
1 0.801260072 PTPRC 1

GO:0018107 BP peptidyl-threonine phosphorylation 3/1105 120/16241 0.990020618  
1 0.801260072 CAMK2A/PRKCB/BMP7 3

GO:0035194 BP posttranscriptional gene silencing by RNA 3/1105 120/16241  
0.990020618 1 0.801260072 LIN28B/TERT/TRIM71 3

GO:0045727 BP positive regulation of translation 3/1105 120/16241 0.990020618 1  
0.801260072 DAZL/THBS1/VIM 3

GO:0009206 BP purine ribonucleoside triphosphate biosynthetic process 4/1105  
144/16241 0.99019454 1 0.801260072 HTR2A/IGF1/LDHC/MLXIPL 4

GO:0031331 BP positive regulation of cellular catabolic process 14/1105 348/16241  
0.990202959 1 0.801260072  
APOE/DACT1/DCN/HSPB8/HTR2A/IGF1/PRICKLE1/RBM24/APOA4/APOA5/FABP1/MLXIPL/PC  
SK9/TRIM71 14

GO:0006888 BP ER to Golgi vesicle-mediated transport 7/1105 210/16241 0.990428283  
1 0.801260072 ANK2/GAS1/GRIA1/CTAGE4/F2/FOLR1/GOLT1A 7

GO:0007004 BP telomere maintenance via telomerase 1/1105 66/162410.990535621 1  
0.801260072 TERT1

GO:1903051 BP negative regulation of proteolysis involved in cellular protein catabolic  
process 1/1105 66/162410.990535621 1 0.801260072 MAP1A 1

GO:0016441 BP posttranscriptional gene silencing 3/1105 121/16241 0.990564883 1  
0.801260072 LIN28B/TERT/TRIM71 3

GO:0009145 BP purine nucleoside triphosphate biosynthetic process 4/1105 145/16241  
0.990692927 1 0.801260072 HTR2A/IGF1/LDHC/MLXIPL 4

GO:0006457 BP protein folding 7/1105 211/16241 0.990846257 1 0.801260072  
CRYAB/DNAJB5/GNAO1/GNB4/HSPB6/NPPC/UNC45B 7

GO:1902275 BP regulation of chromatin organization 5/1105 168/16241 0.990869344  
1 0.801260072 MYOCD/NAP1L2/APOBEC1/CTCF/PRDM12 5

GO:0002181 BP cytoplasmic translation 2/1105 96/162410.990895706 1 0.801260072  
CPEB1/RBM242

GO:0016073 BP snRNA metabolic process 2/1105 96/162410.990895706 1  
0.801260072 CT45A10/CT45A5 2

GO:0046031 BP ADP metabolic process 3/1105 122/16241 0.991080462 1  
0.801260072 HTR2A/IGF1/MLXIPL 3

GO:0042273 BP ribosomal large subunit biogenesis 1/1105 67/162410.991182183 1  
0.801260072 RPL3L 1

GO:0043467 BP regulation of generation of precursor metabolites and energy 4/1105  
147/16241 0.99161797 1 0.801260072 HTR2A/IGF1/SORBS1/MLXIPL 4

GO:0062012 BP regulation of small molecule metabolic process 18/1105 428/16241  
0.991732394 1 0.801260072  
ADCYAP1R1/ADIPOQ/APOE/ATCAY/CNR1/HTR2A/IGF1/IGFBP4/SORBS1/APOA4/APOA5/APO  
C3/FABP1/FOXA2/GUCA2A/MLXIPL/PDZD3/UGT1A8 18

GO:0006278 BP RNA-dependent DNA biosynthetic process 1/1105 68/162410.991784612  
1 0.801260072 TERT1

GO:0006625 BP protein targeting to peroxisome 1/1105 68/162410.991784612 1  
0.801260072 AGXT 1

GO:0072662 BP protein localization to peroxisome 1/1105 68/162410.991784612 1  
0.801260072 AGXT 1

GO:0072663 BP establishment of protein localization to peroxisome 1/1105 68/16241  
0.991784612 1 0.801260072 AGXT 1

GO:0048024 BP regulation of mRNA splicing, via spliceosome 2/1105 98/16241  
0.991954234 1 0.801260072 CELF2/RBM24 2

GO:0043574 BP peroxisomal transport 1/1105 69/162410.992345918 1 0.801260072  
AGXT 1

GO:0044786 BP cell cycle DNA replication 1/1105 69/162410.992345918 1  
0.801260072 FGFR1 1

GO:0046902 BP regulation of mitochondrial membrane permeability 1/1105 69/16241  
0.992345918 1 0.801260072 CAMK2A 1

GO:1905269 BP positive regulation of chromatin organization 2/1105 99/16241  
0.992437377 1 0.801260072 NAP1L2/PRDM12 2

GO:0006665 BP sphingolipid metabolic process 4/1105 149/16241 0.99245458 1  
0.801260072 ST6GALNAC5/ST8SIA2/ST8SIA6/FUT3 4

GO:0009126 BP purine nucleoside monophosphate metabolic process 11/1105 297/16241  
0.992498025 1 0.801260072  
ADCYAP1/ATP1A2/HTR2A/IGF1/NDUFC2-KCTD14/NT5C1A/NUDT10/NUDT11/LDHC/MLXIPL/  
MYH4 11

GO:0009201 BP ribonucleoside triphosphate biosynthetic process 4/1105 150/16241  
0.992842254 1 0.801260072 HTR2A/IGF1/LDHC/MLXIPL 4

GO:0043044 BP ATP-dependent chromatin remodeling 1/1105 70/162410.992868906 1  
0.801260072 SYCP3 1

GO:1903322 BP positive regulation of protein modification by small protein conjugation or  
removal 3/1105 126/16241 0.992883778 1 0.801260072  
PRICKLE1/MAGEA2/MAGEA2B 3

GO:0072522 BP purine-containing compound biosynthetic process 10/1105 280/16241  
0.993338591 1 0.801260072  
ADCY2/ADCY5/HTR2A/IGF1/NPPC/GUCA2A/GUCY2C/LDHC/MLXIPL/PDZD3 10

GO:0034502 BP protein localization to chromosome 1/1105 71/162410.993356189 1  
0.801260072 TERT1

GO:0051303 BP establishment of chromosome localization 1/1105 71/162410.993356189  
1 0.801260072 FMN2 1

GO:0010639 BP negative regulation of organelle organization 14/1105 359/16241  
0.993426015 1 0.801260072  
ADD2/CLIP3/IGF1/LMOD1/MYOC/NAV3/PTTG2/SHANK1/SLIT2/STMN2/SYT4/TMEFF2/APOB  
EC1/BMP7 14

GO:0043543 BP protein acylation 8/1105 240/16241 0.993602045 1 0.801260072  
CLIP3/MYOC/NAP1L2/MAGEA2/MAGEA2B/PCK1/ZDHHC11/ZDHHC11B 8

GO:0033157 BP regulation of intracellular protein transport 7/1105 219/16241  
0.993622001 1 0.801260072 ADIPOQ/AGTR2/FLNA/GLI3/ITGB2/KCNB1/CHP2 7

GO:0016571 BP histone methylation 3/1105 128/16241 0.993647743 1  
 0.801260072 SMYD1/CTCF/PRDM12 3  
 GO:0018210 BP peptidyl-threonine modification 3/1105 128/16241 0.993647743 1  
 0.801260072 CAMK2A/PRKCB/BMP7 3  
 GO:1902850 BP microtubule cytoskeleton organization involved in mitosis 3/1105  
 128/16241 0.993647743 1 0.801260072 FGF10/FLNA/ACTL83  
 GO:0000422 BP autophagy of mitochondrion 1/1105 72/16241 0.993810204 1  
 0.801260072 MAP1LC3C 1  
 GO:0006342 BP chromatin silencing 1/1105 72/16241 0.993810204 1 0.801260072  
 APOBEC1 1  
 GO:0050000 BP chromosome localization 1/1105 72/16241 0.993810204 1  
 0.801260072 FMN2 1  
 GO:0061726 BP mitochondrion disassembly 1/1105 72/16241 0.993810204 1  
 0.801260072 MAP1LC3C 1  
 GO:1902036 BP regulation of hematopoietic stem cell differentiation 1/1105 72/16241  
 0.993810204 1 0.801260072 LMO1 1  
 GO:0009132 BP nucleoside diphosphate metabolic process 4/1105 153/16241  
 0.993893896 1 0.801260072 HTR2A/IGF1/ENTPD8/MLXIPL4  
 GO:0022406 BP membrane docking 5/1105 177/16241 0.994164994 1 0.801260072  
 BVES/CAMK2A/KCNB1/TUBA1A/VCAM1 5  
 GO:0032482 BP Rab protein signal transduction 1/1105 73/16241 0.994233218 1  
 0.801260072 RAB31 1  
 GO:0009416 BP response to light stimulus 11/1105 304/16241 0.994320368 1  
 0.801260072  
 ATP1A2/ELANE/GPR88/IL12B/MFAP4/NETO1/GNGT1/PPP1R1B/REEP6/RGR/SERPINB13 11  
 GO:0006165 BP nucleoside diphosphate phosphorylation 3/1105 130/16241  
 0.994332003 1 0.801260072 HTR2A/IGF1/MLXIPL 3  
 GO:0009127 BP purine nucleoside monophosphate biosynthetic process 4/1105  
 155/16241 0.99451067 1 0.801260072 HTR2A/IGF1/LDHC/MLXIPL 4  
 GO:0009168 BP purine ribonucleoside monophosphate biosynthetic process 4/1105  
 155/16241 0.99451067 1 0.801260072 HTR2A/IGF1/LDHC/MLXIPL 4  
 GO:0002479 BP antigen processing and presentation of exogenous peptide antigen via MHC  
 class I, TAP-dependent 1/1105 74/16241 0.994627348 1 0.801260072 CYBB 1  
 GO:0007032 BP endosome organization 1/1105 74/16241 0.994627348 1 0.801260072  
 PI4K2B 1  
 GO:0009124 BP nucleoside monophosphate biosynthetic process 5/1105 179/16241  
 0.994724161 1 0.801260072 HTR2A/IGF1/ENTPD8/LDHC/MLXIPL 5  
 GO:0048524 BP positive regulation of viral process 2/1105 105/16241 0.994793284 1  
 0.801260072 APOE/CSF1R 2  
 GO:0043901 BP negative regulation of multi-organism process 4/1105 156/16241  
 0.994796118 1 0.801260072 FCN1/FGL2/IGF1/NPPC 4  
 GO:0046939 BP nucleotide phosphorylation 3/1105 132/16241 0.994944562 1  
 0.801260072 HTR2A/IGF1/MLXIPL 3  
 GO:0033045 BP regulation of sister chromatid segregation 1/1105 75/16241 0.994994564

1 0.801260072 PTTG2 1  
 GO:0061418 BP regulation of transcription from RNA polymerase II promoter in response to hypoxia 1/1105 75/162410.994994564 1 0.801260072 EPO 1  
 GO:0072332 BP intrinsic apoptotic signaling pathway by p53 class mediator 1/1105 75/162410.994994564 1 0.801260072 PHLA3 1  
 GO:0006282 BP regulation of DNA repair 2/1105 106/16241 0.99510866 1 0.801260072 FGF10/FMN2 2  
 GO:0034620 BP cellular response to unfolded protein 3/1105 133/16241 0.995226246 1 0.801260072 EXTL1/HSPB8/CREB3L3 3  
 GO:0009135 BP purine nucleoside diphosphate metabolic process 3/1105 134/16241 0.995492665 1 0.801260072 HTR2A/IGF1/MLXIPL 3  
 GO:0009179 BP purine ribonucleoside diphosphate metabolic process 3/1105 134/16241 0.995492665 1 0.801260072 HTR2A/IGF1/MLXIPL 3  
 GO:0043484 BP regulation of RNA splicing 3/1105 134/16241 0.995492665 1 0.801260072 AHNAK2/CELF2/RBM24 3  
 GO:0046467 BP membrane lipid biosynthetic process 3/1105 134/16241 0.995492665 1 0.801260072 ST6GALNAC5/ST8SIA2/ST8SIA6 3  
 GO:0009152 BP purine ribonucleotide biosynthetic process 8/1105 248/16241 0.995510597 1 0.801260072 ADCY2/ADCY5/HTR2A/IGF1/NPPC/GUCY2C/LDHC/MLXIPL 8  
 GO:0009123 BP nucleoside monophosphate metabolic process 12/1105 330/16241 0.995537179 1 0.801260072 ADCYAP1/ATP1A2/HTR2A/IGF1/NDUFC2-KCTD14/NT5C1A/NUDT10/NUDT11/ENTPD8/LDHC/MLXIPL/MYH4 12  
 GO:1901293 BP nucleoside phosphate biosynthetic process 13/1105 350/16241 0.995571429 1 0.801260072 ADCY2/ADCY5/HTR2A/IDO2/IGF1/NPPC/PTGIS/ENTPD8/GUCA2A/GUCY2C/LDHC/MLXIPL/PDZD3 13  
 GO:0032436 BP positive regulation of proteasomal ubiquitin-dependent protein catabolic process 1/1105 77/162410.995655474 1 0.801260072 PRICKLE1 1  
 GO:0042147 BP retrograde transport, endosome to Golgi 1/1105 77/162410.995655474 1 0.801260072 MAGEL2 1  
 GO:1903901 BP negative regulation of viral life cycle 1/1105 77/162410.995655474 1 0.801260072 FCN1 1  
 GO:0038127 BP ERBB signaling pathway 3/1105 135/16241 0.995744616 1 0.801260072 EFEMP1/MYOC/SLC30A10 3  
 GO:0006119 BP oxidative phosphorylation 2/1105 109/16241 0.99594652 1 0.801260072 NDUFC2-KCTD14/MLXIPL 2  
 GO:0031929 BP TOR signaling 2/1105 109/16241 0.99594652 1 0.801260072 AKT3/RELN 2  
 GO:0018105 BP peptidyl-serine phosphorylation 10/1105 292/16241 0.995951752 1 0.801260072 AKT3/CAMK2A/DCLK1/DKK1/NTRK2/PRKCB/SFRP2/TCL1A/EPO/MLXIPL 10  
 GO:0006368 BP transcription elongation from RNA polymerase II promoter 1/1105 78/162410.995952474 1 0.801260072 SOX10 1

GO:0010833 BP telomere maintenance via telomere lengthening 1/1105 78/16241  
0.995952474 1 0.801260072 TERT1

GO:0042590 BP antigen processing and presentation of exogenous peptide antigen via MHC class I 1/1105 78/16241 0.995952474 1 0.801260072 CYBB 1

GO:0008286 BP insulin receptor signaling pathway 3/1105 136/16241 0.995982859 1  
0.801260072 PRKCB/SORBS1/ATP6V1C2 3

GO:0009185 BP ribonucleoside diphosphate metabolic process 3/1105 136/16241  
0.995982859 1 0.801260072 HTR2A/IGF1/MLXIPL 3

GO:0050684 BP regulation of mRNA processing 3/1105 136/16241 0.995982859 1  
0.801260072 CELF2/CPEB1/RBM24 3

GO:0009142 BP nucleoside triphosphate biosynthetic process 4/1105 161/16241  
0.996021747 1 0.801260072 HTR2A/IGF1/LDHC/MLXIPL 4

GO:0007031 BP peroxisome organization 1/1105 79/16241 0.996229187 1 0.801260072  
AGXT 1

GO:0034644 BP cellular response to UV 1/1105 79/16241 0.996229187 1 0.801260072  
MFAP4 1

GO:1903363 BP negative regulation of cellular protein catabolic process 1/1105  
79/16241 0.996229187 1 0.801260072 MAP1A 1

GO:0035195 BP gene silencing by miRNA 2/1105 111/16241 0.996425023 1  
0.801260072 LIN28B/TRIM71 2

GO:0038095 BP Fc-epsilon receptor signaling pathway 2/1105 111/16241 0.996425023  
1 0.801260072 FCER1A/LILRA4 2

GO:0000018 BP regulation of DNA recombination 1/1105 80/16241 0.996486998 1  
0.801260072 PTPRC 1

GO:0060964 BP regulation of gene silencing by miRNA 1/1105 80/16241 0.996486998 1  
0.801260072 TRIM71 1

GO:1902115 BP regulation of organelle assembly 5/1105 187/16241 0.996488803 1  
0.801260072 CBLN1/GAP43/LRRTM1/PTPRS/NOTO 5

GO:0009167 BP purine ribonucleoside monophosphate metabolic process 10/1105  
296/16241 0.996581631 1 0.801260072  
ADCYAP1/ATP1A2/HTR2A/IGF1/NDUFC2-KCTD14/NUDT10/NUDT11/LDHC/MLXIPL/MYH4  
10

GO:1903311 BP regulation of mRNA metabolic process 11/1105 317/16241 0.996654783  
1 0.801260072  
CACNG7/CELF2/CPEB1/DAZL/RBM24/VIM/VIP/APOBEC1/IGF2BP1/SCGB1A1/TRIM71 11

GO:0007173 BP epidermal growth factor receptor signaling pathway 2/1105 113/16241  
0.996847908 1 0.801260072 EFEMP1/SLC30A10 2

GO:0042775 BP mitochondrial ATP synthesis coupled electron transport 1/1105  
82/16241 0.996950988 1 0.801260072 NDUFC2-KCTD14 1

GO:0006612 BP protein targeting to membrane 5/1105 190/16241 0.996991061 1  
0.801260072 ITGB2/KCNB1/RTP5/ZDHHC11/ZDHHC11B 5

GO:0061025 BP membrane fusion 3/1105 141/16241 0.996992404 1 0.801260072  
FOLR2/GRIK5/SYT4 3

GO:0008637 BP apoptotic mitochondrial changes 2/1105 114/16241 0.997040503 1

0.801260072 CAMK2A/IGF1 2  
 GO:0010508 BP positive regulation of autophagy 2/1105 114/16241 0.997040503 1  
 0.801260072 DCN/HSPB8 2  
 GO:0043900 BP regulation of multi-organism process 14/1105 381/16241 0.997135614  
 1 0.801260072  
 APOE/CNR1/CSF1R/FCER2/FCN1/FGL2/IGF1/IL12B/NPPC/PDE3A/SYT11/VIP/PGLYRP3/PGLYR  
 P4 14  
 GO:0042773 BP ATP synthesis coupled electron transport 1/1105 83/16241 0.997159489  
 1 0.801260072 NDUFC2-KCTD14 1  
 GO:0006333 BP chromatin assembly or disassembly 2/1105 115/16241 0.997221513  
 1 0.801260072 NAP1L2/NAP1L3 2  
 GO:0016241 BP regulation of macroautophagy 4/1105 168/16241 0.99727983 1  
 0.801260072 DCN/HSPB8/UCLH1/ATP6V1C2 4  
 GO:0140056 BP organelle localization by membrane tethering 4/1105 168/16241  
 0.99727983 1 0.801260072 BVES/CAMK2A/KCNB1/TUBA1A 4  
 GO:0034250 BP positive regulation of cellular amide metabolic process 3/1105  
 143/16241 0.997322842 1 0.801260072 DAZL/THBS1/VIM 3  
 GO:0001578 BP microtubule bundle formation 1/1105 84/16241 0.997353743 1  
 0.801260072 ARMC4 1  
 GO:0045930 BP negative regulation of mitotic cell cycle 10/1105 302/16241 0.997354949  
 1 0.801260072  
 BRINP3/DACT1/FHL1/GAS1/GPNMB/PTTG2/TIMP2/WNT9A/BMP7/OVOL1 10  
 GO:0030968 BP endoplasmic reticulum unfolded protein response 2/1105 116/16241  
 0.997391621 1 0.801260072 EXTL1/CREB3L3 2  
 GO:0043618 BP regulation of transcription from RNA polymerase II promoter in response to  
 stress 2/1105 116/16241 0.997391621 1 0.801260072 CREB3L3/EPO 2  
 GO:0016052 BP carbohydrate catabolic process 5/1105 193/16241 0.997423734 1  
 0.801260072 HTR2A/IGF1/PYGM/G6PC/MLXIPL 5  
 GO:0009156 BP ribonucleoside monophosphate biosynthetic process 4/1105 169/16241  
 0.997424591 1 0.801260072 HTR2A/IGF1/LDHC/MLXIPL 4  
 GO:0009260 BP ribonucleotide biosynthetic process 8/1105 261/16241 0.997509816  
 1 0.801260072 ADCY2/ADCY5/HTR2A/IGF1/NPPC/GUCY2C/LDHC/MLXIPL 8  
 GO:0061640 BP cytoskeleton-dependent cytokinesis 1/1105 85/16241 0.997534724 1  
 0.801260072 FMN2 1  
 GO:1901532 BP regulation of hematopoietic progenitor cell differentiation 1/1105  
 85/16241 0.997534724 1 0.801260072 LMO1 1  
 GO:0042176 BP regulation of protein catabolic process 13/1105 365/16241 0.997543573  
 1 0.801260072  
 APOE/ASB5/DACT1/FLNA/FMN2/MAP1A/PRICKLE1/TIMP2/TIMP3/VIP/C4BPB/PCSK9/TRIM4  
 0 13  
 GO:0000280 BP nuclear division 14/1105 385/16241 0.997548135 1 0.801260072  
 CCDC8/CCNA1/DAZL/FLNA/FMN2/HFM1/IGF1/MEIKIN/PDE3A/PDGFRB/PTTG2/BMP7/MCM  
 DC2/SYCP3 14  
 GO:2001020 BP regulation of response to DNA damage stimulus 5/1105 194/16241

0.997554129 1 0.801260072 CXCL12/FGF10/FMN2/HIC1/SFRP25  
 GO:0031047 BP gene silencing by RNA 3/1105 145/16241 0.99761778 1  
 0.801260072 LIN28B/TERT/TRIM71 3  
 GO:0009165 BP nucleotide biosynthetic process 12/1105 346/16241 0.99765857 1  
 0.801260072  
 ADCY2/ADCY5/HTR2A/IDO2/IGF1/NPPC/PTGIS/GUCA2A/GUCY2C/LDHC/MLXIPL/PDZD3 12  
 GO:0032434 BP regulation of proteasomal ubiquitin-dependent protein catabolic process  
 2/1105 118/16241 0.997701671 1 0.801260072 MAP1A/PRICKLE1 2  
 GO:0010972 BP negative regulation of G2/M transition of mitotic cell cycle 1/1105  
 86/16241 0.997703338 1 0.801260072 FHL1 1  
 GO:0045814 BP negative regulation of gene expression, epigenetic 1/1105 86/16241  
 0.997703338 1 0.801260072 APOBEC1 1  
 GO:0046034 BP ATP metabolic process 8/1105 263/16241 0.997728921 1  
 0.801260072 ADCYAP1/ATP1A2/HTR2A/IGF1/NDUFC2-KCTD14/LDHC/MLXIPL/MYH4 8  
 GO:0006643 BP membrane lipid metabolic process 5/1105 196/16241 0.997796073 1  
 0.801260072 CYP1B1/ST6GALNAC5/ST8SIA2/ST8SIA6/FUT3 5  
 GO:0034248 BP regulation of cellular amide metabolic process 14/1105 388/16241  
 0.997819929 1 0.801260072  
 APOE/C8orf88/CPEB1/DAZL/IGF1/IGFBP5/QKI/RBM24/SPON1/THBS1/VIM/IGF2BP1/TRIM7  
 1/YBX2 14  
 GO:0006473 BP protein acetylation 5/1105 197/16241 0.997908208 1 0.801260072  
 MYOCD/NAP1L2/MAGEA2/MAGEA2B/PCK1 5  
 GO:0098876 BP vesicle-mediated transport to the plasma membrane 1/1105 88/16241  
 0.998006785 1 0.801260072 RAB31 1  
 GO:0043620 BP regulation of DNA-templated transcription in response to stress 2/1105  
 121/16241 0.998099916 1 0.801260072 CREB3L3/EPO 2  
 GO:0009161 BP ribonucleoside monophosphate metabolic process 10/1105 310/16241  
 0.998130477 1 0.801260072  
 ADCYAP1/ATP1A2/HTR2A/IGF1/NDUFC2-KCTD14/NUDT10/NUDT11/LDHC/MLXIPL/MYH4  
 10  
 GO:0006417 BP regulation of translation 11/1105 331/16241 0.998140579 1  
 0.801260072  
 C8orf88/CPEB1/DAZL/IGFBP5/QKI/RBM24/THBS1/VIM/IGF2BP1/TRIM71/YBX211  
 GO:0051656 BP establishment of organelle localization 19/1105 490/16241 0.998145775  
 1 0.801260072  
 CAMK2A/CHRM2/CHRNA6/CNR1/FGF10/FMN2/GRIA1/GRIK5/HTR2A/NEFL/NLGN1/PRKCB/  
 SNAP91/SYT11/SYT4/TRIM58/UCHL1/ACTL8/FOLR1 19  
 GO:0046390 BP ribose phosphate biosynthetic process 8/1105 268/16241 0.99819889  
 1 0.801260072 ADCY2/ADCY5/HTR2A/IGF1/NPPC/GUCY2C/LDHC/MLXIPL 8  
 GO:0019058 BP viral life cycle 10/1105 312/16241 0.998287324 1 0.801260072  
 APOE/AXL/CLEC4G/CR1/CR2/FCN1/HTR2A/MRC1/NCAM1/CLDN9 10  
 GO:0051188 BP cofactor biosynthetic process 10/1105 312/16241 0.998287324 1  
 0.801260072 CYBB/GGT5/HTR2A/IDO2/IGF1/PTGIS/DUOX2/DUOX2A/GGT6/MLXIPL 10  
 GO:0048525 BP negative regulation of viral process 1/1105 91/16241 0.99838852 1

0.801260072 FCN1 1  
 GO:2000060 BP positive regulation of ubiquitin-dependent protein catabolic process 1/1105  
 91/162410.99838852 1 0.801260072 PRICKLE1 1  
 GO:0034976 BP response to endoplasmic reticulum stress 8/1105 271/16241  
 0.998434478 1 0.801260072  
 EXTL1/FCGR2B/THBS1/THBS4/CREB3L3/MAGEA3/RNF183/RNF186 8  
 GO:0006091 BP generation of precursor metabolites and energy 18/1105 476/16241  
 0.998473253 1 0.801260072  
 ADH1B/ADIPOQ/ADRB3/AOX1/CYBB/GFPT2/HTR2A/IGF1/NDUFC2-KCTD14/PYGM/RUNX1T1  
 /SORBS1/ADH7/AKR1C4/COX7B2/G6PC/MLXIPL/XDH 18  
 GO:0035967 BP cellular response to topologically incorrect protein 3/1105 153/16241  
 0.998511289 1 0.801260072 EXTL1/HSPB8/CREB3L3 3  
 GO:0016197 BP endosomal transport 5/1105 204/16241 0.998552319 1  
 0.801260072 ACTN2/BVES/DCLK1/EHD2/MAGEL2 5  
 GO:0007018 BP microtubule-based movement 8/1105 273/16241 0.998574781 1  
 0.801260072 ARMC4/FMN2/MAP1A/NEFL/TRIM58/TUB/UCHL1/ACTL8 8  
 GO:0031146 BP SCF-dependent proteasomal ubiquitin-dependent protein catabolic process  
 1/1105 93/162410.998601501 1 0.801260072 WWTR1 1  
 GO:2001251 BP negative regulation of chromosome organization 2/1105 126/16241  
 0.998617941 1 0.801260072 PTTG2/APOBEC1 2  
 GO:0032984 BP protein-containing complex disassembly 10/1105 317/16241  
 0.998626308 1 0.801260072  
 ACTN2/ADD2/LIX1/LMOD1/MAP1A/MAP1LC3C/NAV3/STMN2/STMN4/STMND1 10  
 GO:0006352 BP DNA-templated transcription, initiation 6/1105 229/16241 0.998652899  
 1 0.801260072 AR/RORB/RXRG/WWTR1/NR1I2/NR2E1 6  
 GO:0048285 BP organelle fission 15/1105 422/16241 0.99874603 1 0.801260072  
 CCDC8/CCNA1/DAZL/DCN/FLNA/FMN2/HFM1/IGF1/MEIKIN/PDE3A/PDGFRB/PTTG2/BMP7/  
 MCMDC2/SYCP3 15  
 GO:0090068 BP positive regulation of cell cycle process 8/1105 276/16241 0.998762815  
 1 0.801260072 ADAMTS1/DAZL/FGF10/FGFR1/IGF1/KCNA5/PDGFRB/TERT 8  
 GO:0002474 BP antigen processing and presentation of peptide antigen via MHC class I  
 1/1105 95/162410.998786355 1 0.801260072 CYBB 1  
 GO:0097711 BP ciliary basal body-plasma membrane docking 1/1105 95/16241  
 0.998786355 1 0.801260072 TUBA1A 1  
 GO:1902750 BP negative regulation of cell cycle G2/M phase transition 1/1105  
 95/162410.998786355 1 0.801260072 FHL1 1  
 GO:1903008 BP organelle disassembly 1/1105 95/162410.998786355 1 0.801260072  
 MAP1LC3C 1  
 GO:0045787 BP positive regulation of cell cycle 12/1105 362/16241 0.998798113 1  
 0.801260072  
 ADAMTS1/DAZL/FGF10/FGFR1/IGF1/KCNA5/PDGFRB/SMOC2/MLXIPL/NR2E1/OVOL1/TERT  
 12  
 GO:0031124 BP mRNA 3'-end processing 1/1105 96/162410.998869414 1 0.801260072  
 CPEB1 1

GO:0051983 BP regulation of chromosome segregation 1/1105 96/162410.998869414 1  
0.801260072 PTTG2 1

GO:0006479 BP protein methylation 3/1105 159/16241 0.998956973 1  
0.801260072 SMYD1/CTCFL/PRDM12 3

GO:0008213 BP protein alkylation 3/1105 159/16241 0.998956973 1 0.801260072  
SMYD1/CTCFL/PRDM12 3

GO:0016311 BP dephosphorylation 16/1105 448/16241 0.999010421 1 0.801260072  
AGTR2/CCDC8/CILP/NT5C1A/PDGFRB/PTPRC/PTPRN/PTPRS/ALPI/CHP2/FBP2/G6PC/PPP1R1  
4C/PPP1R14D/PPP1R1B/PPP1R27 16

GO:0007033 BP vacuole organization 3/1105 160/16241 0.999017272 1  
0.801260072 CLVS2/MAP1LC3C/SYNPO2 3

GO:0051052 BP regulation of DNA metabolic process 13/1105 388/16241 0.999040414  
1 0.801260072  
ADIPOQ/FGF10/FGF2/FGFR1/FMN2/GLI2/GREM1/KCNK2/NPPC/PDGFRB/PTPRC/SMOC2/AP  
OBEC1 13

GO:1901800 BP positive regulation of proteasomal protein catabolic process 1/1105  
99/162410.99908604 1 0.801260072 PRICKLE1 1

GO:0006732 BP coenzyme metabolic process 13/1105 390/16241 0.999117453 1  
0.801260072  
BHMT2/FMO1/FMO2/FOLR2/HTR2A/IDO2/IGF1/PTGIS/CYP4F2/FOLR1/MLXIPL/NOX1/VNN3  
13

GO:0006475 BP internal protein amino acid acetylation 3/1105 162/16241 0.999127794  
1 0.801260072 MYOCD/NAP1L2/PCK1 3

GO:0015980 BP energy derivation by oxidation of organic compounds 7/1105 261/16241  
0.999139317 1 0.801260072  
ADRB3/GFPT2/IGF1/NDUFC2-KCTD14/PYGM/SORBS1/G6PC 7

GO:0006892 BP post-Golgi vesicle-mediated transport 1/1105 100/16241 0.999148606  
1 0.801260072 RAB31 1

GO:0070972 BP protein localization to endoplasmic reticulum 2/1105 134/16241  
0.99917189 1 0.801260072 ANK2/GRIK5 2

GO:0022904 BP respiratory electron transport chain 1/1105 101/16241 0.999206891  
1 0.801260072 NDUFC2-KCTD14 1

GO:0006470 BP protein dephosphorylation 9/1105 308/16241 0.999225127 1  
0.801260072  
AGTR2/PDGFRB/PTPRC/PTPRN/PTPRS/PPP1R14C/PPP1R14D/PPP1R1B/PPP1R27 9

GO:0007052 BP mitotic spindle organization 1/1105 103/16241 0.999311775 1  
0.801260072 FLNA 1

GO:0030330 BP DNA damage response, signal transduction by p53 class mediator 1/1105  
103/16241 0.999311775 1 0.801260072 HIC1 1

GO:0007051 BP spindle organization 3/1105 166/16241 0.999313508 1  
0.801260072 CCDC69/FLNA/GOLGA80 3

GO:0009205 BP purine ribonucleoside triphosphate metabolic process 8/1105 291/16241  
0.999396955 1 0.801260072  
ADCYAP1/ATP1A2/HTR2A/IGF1/NDUFC2-KCTD14/LDHC/MLXIPL/MYH4 8

GO:0007006 BP mitochondrial membrane organization 1/1105 105/16241 0.999402799  
1 0.801260072 CAMK2A 1

GO:0032508 BP DNA duplex unwinding 1/1105 105/16241 0.999402799 1  
0.801260072 HFM1 1

GO:0006354 BP DNA-templated transcription, elongation 1/1105 106/16241  
0.999443696 1 0.801260072 SOX10 1

GO:0006913 BP nucleocytoplasmic transport 10/1105 338/16241 0.999467923 1  
0.801260072 AGTR2/EGR2/FLNA/GLI3/PRICKLE1/RANBP3L/SIX2/CHP2/NEUROD1/SIX3 10

GO:0065004 BP protein-DNA complex assembly 3/1105 171/16241 0.999491821 1  
0.801260072 NAP1L2/NAP1L3/MCMDC2 3

GO:0061136 BP regulation of proteasomal protein catabolic process 3/1105 172/16241  
0.999521579 1 0.801260072 APOE/MAP1A/PRICKLE1 3

GO:0051169 BP nuclear transport 10/1105 341/16241 0.999536635 1 0.801260072  
AGTR2/EGR2/FLNA/GLI3/PRICKLE1/RANBP3L/SIX2/CHP2/NEUROD1/SIX3 10

GO:0009199 BP ribonucleoside triphosphate metabolic process 8/1105 297/16241  
0.999549849 1 0.801260072  
ADCYAP1/ATP1A2/HTR2A/IGF1/NDUFC2-KCTD14/LDHC/MLXIPL/MYH4 8

GO:0010948 BP negative regulation of cell cycle process 9/1105 320/16241  
0.999559734 1 0.801260072  
DACT1/FGF10/FHL1/GPNMB/PTTG2/BMP7/C10orf99/MLXIPL/OVOL1 9

GO:0009144 BP purine nucleoside triphosphate metabolic process 8/1105 298/16241  
0.999571375 1 0.801260072  
ADCYAP1/ATP1A2/HTR2A/IGF1/NDUFC2-KCTD14/LDHC/MLXIPL/MYH4 8

GO:0032259 BP methylation 9/1105 321/16241 0.9995802 1 0.801260072  
BHMT2/INMT/METTL24/PRDM8/SMYD1/CTCF/PRDM12/TDRD5 9

GO:2000058 BP regulation of ubiquitin-dependent protein catabolic process 2/1105  
145/16241 0.999592647 1 0.801260072 MAP1A/PRICKLE1 2

GO:0006261 BP DNA-dependent DNA replication 2/1105 147/16241 0.999642159 1  
0.801260072 FGFR1/MCMDC2 2

GO:0009451 BP RNA modification 2/1105 147/16241 0.999642159 1 0.801260072  
A1CF/APOBEC1 2

GO:0051028 BP mRNA transport 2/1105 147/16241 0.999642159 1 0.801260072  
QKI/IGF2BP1 2

GO:1901988 BP negative regulation of cell cycle phase transition 5/1105 230/16241  
0.999643839 1 0.801260072 DACT1/FHL1/GPNMB/C10orf99/OVOL15

GO:0140014 BP mitotic nuclear division 6/1105 255/16241 0.999649591 1  
0.801260072 CCDC8/FLNA/IGF1/PDGFRB/PTTG2/BMP7 6

GO:0010822 BP positive regulation of mitochondrion organization 1/1105 113/16241  
0.999661467 1 0.801260072 DCN 1

GO:0032392 BP DNA geometric change 1/1105 114/16241 0.999684661 1  
0.801260072 HFM1 1

GO:1903052 BP positive regulation of proteolysis involved in cellular protein catabolic process  
1/1105 114/16241 0.999684661 1 0.801260072 PRICKLE1 1

GO:1903362 BP regulation of cellular protein catabolic process 5/1105 234/16241

0.999714237 1 0.801260072 APOE/DACT1/MAP1A/PRICKLE1/PCSK9 5  
 GO:0071824 BP protein-DNA complex subunit organization 4/1105 209/16241  
 0.999729711 1 0.801260072 NAP1L2/NAP1L3/MCMDC2/SYCP3 4  
 GO:0016236 BP macroautophagy 7/1105 286/16241 0.999756695 1 0.801260072  
 DCN/HSPB8/LIX1/MAP1LC3C/SYNPO2/UCHL1/ATP6V1C2 7  
 GO:0016573 BP histone acetylation 2/1105 153/16241 0.999757671 1 0.801260072  
 MYOCD/NAP1L2 2  
 GO:0098813 BP nuclear chromosome segregation 5/1105 237/16241 0.999757917 1  
 0.801260072 FMN2/HFM1/MEIKIN/PTTG2/MCMDC25  
 GO:0016050 BP vesicle organization 8/1105 310/16241 0.999763274 1 0.801260072  
 GRIA1/GRIK5/PI4K2B/PTPRN/SNAP91/SYT4/ZEB2/FOLR1 8  
 GO:0018393 BP internal peptidyl-lysine acetylation 2/1105 157/16241 0.999813279  
 1 0.801260072 MYOCD/NAP1L2 2  
 GO:0044782 BP cilium organization 10/1105 361/16241 0.99981869 1 0.801260072  
 ARMC4/FLNA/NME8/TUB/TUBA1A/WWTR1/AKAP4/CFAP52/NOTO/RFX4 10  
 GO:0031396 BP regulation of protein ubiquitination 3/1105 189/16241 0.999830022  
 1 0.801260072 PRICKLE1/MAGEA2/MAGEA2B 3  
 GO:0009141 BP nucleoside triphosphate metabolic process 8/1105 317/16241  
 0.999833345 1 0.801260072  
 ADCYAP1/ATP1A2/HTR2A/IGF1/NDUFC2-KCTD14/LDHC/MLXIPL/MYH4 8  
 GO:0000724 BP double-strand break repair via homologous recombination 1/1105  
 123/16241 0.999833554 1 0.801260072 MCMDC2 1  
 GO:0071103 BP DNA conformation change 5/1105 245/16241 0.999844908 1  
 0.801260072 HFM1/NAP1L2/NAP1L3/BANF2/SYCP3 5  
 GO:0000725 BP recombinational repair 1/1105 124/16241 0.999844965 1  
 0.801260072 MCMDC2 1  
 GO:0006338 BP chromatin remodeling 2/1105 161/16241 0.999856216 1  
 0.801260072 SMYD1/SYCP3 2  
 GO:0060271 BP cilium assembly 9/1105 344/16241 0.99986226 1 0.801260072  
 ARMC4/FLNA/NME8/TUBA1A/WWTR1/AKAP4/CFAP52/NOTO/RFX4 9  
 GO:0042770 BP signal transduction in response to DNA damage 1/1105 126/16241  
 0.999865496 1 0.801260072 HIC1 1  
 GO:0016458 BP gene silencing 4/1105 222/16241 0.999873164 1 0.801260072  
 APOBEC1/LIN28B/TERT/TRIM71 4  
 GO:0009108 BP coenzyme biosynthetic process 5/1105 251/16241 0.999889236 1  
 0.801260072 HTR2A/IDO2/IGF1/PTGIS/MLXIPL 5  
 GO:0018394 BP peptidyl-lysine acetylation 2/1105 165/16241 0.999889345 1  
 0.801260072 MYOCD/NAP1L2 2  
 GO:0050792 BP regulation of viral process 3/1105 196/16241 0.999889503 1  
 0.801260072 APOE/CSF1R/FCN1 3  
 GO:0031503 BP protein-containing complex localization 6/1105 277/16241 0.999892107  
 1 0.801260072 CACNG7/NETO1/NLGN1/RELN/SGCD/TUB 6  
 GO:0006402 BP mRNA catabolic process 9/1105 349/16241 0.999892405 1  
 0.801260072 CACNG7/DAZL/RBM24/VIM/VIP/APOBEC1/IGF2BP1/SCGB1A1/TRIM71 9

GO:2001252 BP positive regulation of chromosome organization 2/1105 166/16241  
0.999896368 1 0.801260072 NAP1L2/PRDM12 2

GO:1903050 BP regulation of proteolysis involved in cellular protein catabolic process 3/1105  
202/16241 0.99992376 1 0.801260072 APOE/MAP1A/PRICKLE1 3

GO:0006401 BP RNA catabolic process 10/1105 380/16241 0.999927473 1  
0.801260072  
CACNG7/DAZL/RBM24/VIM/VIP/APOBEC1/IGF2BP1/LIN28B/SCGB1A1/TRIM71 10

GO:0070585 BP protein localization to mitochondrion 1/1105 135/16241 0.999929039  
1 0.801260072 RNF186 1

GO:0009150 BP purine ribonucleotide metabolic process 15/1105 491/16241  
0.999930515 1 0.801260072  
ADCY2/ADCY5/ADCYAP1/ATP1A2/HTR2A/IGF1/NDUFC2-KCTD14/NPPC/NUDT10/NUDT11/G  
UCY2C/LDHC/MLXIPL/MYH4/SULT2A1 15

GO:0000819 BP sister chromatid segregation 2/1105 173/16241 0.999934575 1  
0.801260072 MEIKIN/PTTG2 2

GO:0090150 BP establishment of protein localization to membrane 7/1105 312/16241  
0.999937564 1 0.801260072 ITGB2/KCNB1/RAB31/REEP2/RTP5/ZDHHC11/ZDHHC11B  
7

GO:0033865 BP nucleoside bisphosphate metabolic process 1/1105 137/16241  
0.999938442 1 0.801260072 SULT2A1 1

GO:0033875 BP ribonucleoside bisphosphate metabolic process 1/1105 137/16241  
0.999938442 1 0.801260072 SULT2A1 1

GO:0034032 BP purine nucleoside bisphosphate metabolic process 1/1105 137/16241  
0.999938442 1 0.801260072 SULT2A1 1

GO:1903900 BP regulation of viral life cycle 1/1105 138/16241 0.999942666 1  
0.801260072 FCN1 1

GO:0010506 BP regulation of autophagy 7/1105 315/16241 0.999946778 1  
0.801260072 DCN/HSPB8/IL10RA/SOGA3/UCHL1/ATP6V1C2/DAPL1 7

GO:0006611 BP protein export from nucleus 2/1105 177/16241 0.999949733 1  
0.801260072 EGR2/RANBP3L 2

GO:0010821 BP regulation of mitochondrion organization 2/1105 177/16241  
0.999949733 1 0.801260072 DCN/IGF1 2

GO:0007059 BP chromosome segregation 6/1105 292/16241 0.999952518 1  
0.801260072 FMN2/HFM1/MEIKIN/PTTG2/BANF2/MCMDC2 6

GO:0071826 BP ribonucleoprotein complex subunit organization 4/1105 239/16241  
0.999953526 1 0.801260072 CELF2/RPL3L/TDRD5/VCX 4

GO:0043903 BP regulation of symbiosis, encompassing mutualism through parasitism  
3/1105 210/16241 0.999953639 1 0.801260072 APOE/CSF1R/FCN1 3

GO:0000723 BP telomere maintenance 1/1105 142/16241 0.999956858 1  
0.801260072 TERT 1

GO:0050906 BP detection of stimulus involved in sensory perception 14/1105 481/16241  
0.9999586 1 0.801260072  
COL11A1/CST2/CXCL12/HTR2A/KCNA1/KCNK4/OR2W3/OR56B1/PHF24/RTP5/ADGRV1/PRD  
M12/REEP6/TAS2R38 14

GO:0032200 BP telomere organization 1/1105 143/16241 0.999959819 1  
0.801260072 TERT1

GO:0000070 BP mitotic sister chromatid segregation 1/1105 144/16241 0.999962577  
1 0.801260072 PTTG2 1

GO:1903320 BP regulation of protein modification by small protein conjugation or removal  
3/1105 214/16241 0.999963886 1 0.801260072 PRICKLE1/MAGEA2/MAGEA2B  
3

GO:0016482 BP cytosolic transport 1/1105 145/16241 0.999965146 1 0.801260072  
MAGEL2 1

GO:0000209 BP protein polyubiquitination 6/1105 299/16241 0.999967772 1  
0.801260072 MAGEL2/RNF165/TRIM58/RNF183/RNF186/TRIM71 6

GO:1901991 BP negative regulation of mitotic cell cycle phase transition 3/1105  
217/16241 0.999970069 1 0.801260072 DACT1/FHL1/GPNMB 3

GO:0050657 BP nucleic acid transport 2/1105 187/16241 0.999974048 1  
0.801260072 QKI/IGF2BP1 2

GO:0050658 BP RNA transport 2/1105 187/16241 0.999974048 1 0.801260072  
QKI/IGF2BP1 2

GO:0040029 BP regulation of gene expression, epigenetic 5/1105 278/16241  
0.999976269 1 0.801260072 APOBEC1/CTCF/LIN28B/TERT/TRIM71 5

GO:0010389 BP regulation of G2/M transition of mitotic cell cycle 2/1105 189/16241  
0.999977271 1 0.801260072 FHL1/TUBA1A 2

GO:0051236 BP establishment of RNA localization 2/1105 190/16241 0.999978729 1  
0.801260072 QKI/IGF2BP1 2

GO:1901987 BP regulation of cell cycle phase transition 11/1105 428/16241 0.999978753  
1 0.801260072  
ADAMTS1/DACT1/FGF10/FHL1/GPNMB/KCNA5/TUBA1A/C10orf99/OVOL1/SIX3/TERT 11

GO:0006413 BP translational initiation 2/1105 191/16241 0.999980095 1  
0.801260072 C8orf88/DAZL 2

GO:0006403 BP RNA localization 3/1105 224/16241 0.999980717 1 0.801260072  
QKI/A1CF/IGF2BP1 3

GO:0051168 BP nuclear export 2/1105 192/16241 0.999981374 1 0.801260072  
EGR2/RANBP3L 2

GO:0000910 BP cytokinesis 1/1105 154/16241 0.999981626 1 0.801260072  
FMN2 1

GO:0022618 BP ribonucleoprotein complex assembly 3/1105 225/16241 0.999981893  
1 0.801260072 CELF2/RPL3L/VCX 3

GO:0048193 BP Golgi vesicle transport 8/1105 361/16241 0.999982898 1  
0.801260072 ANK2/GAS1/GRIA1/RAB31/CTAGE4/F2/FOLR1/GOLT1A 8

GO:0072331 BP signal transduction by p53 class mediator 4/1105 259/16241  
0.999986002 1 0.801260072 HIC1/PHLDA3/MAGEA2/MAGEA2B 4

GO:0007093 BP mitotic cell cycle checkpoint 1/1105 159/16241 0.999987128 1  
0.801260072 WNT9A 1

GO:0033044 BP regulation of chromosome organization 6/1105 316/16241  
0.999987562 1 0.801260072 MYOCD/NAP1L2/PTTG2/APOBEC1/CTCF/PRDM12 6

GO:0015931 BP nucleobase-containing compound transport 3/1105 234/16241  
0.999989744 1 0.801260072 QKI/IGF2BP1/SLC28A2 3

GO:0018205 BP peptidyl-lysine modification 8/1105 371/16241 0.999989962 1  
0.801260072 EGR2/MYOC/NAP1L2/SMYD1/CTCF/MAGEA2/MAGEA2B/PRDM12 8

GO:0006260 BP DNA replication 4/1105 265/16241 0.999990269 1 0.801260072  
FGF10/FGFR1/GLI2/MCMDC2 4

GO:1902749 BP regulation of cell cycle G2/M phase transition 2/1105 203/16241  
0.999991043 1 0.801260072 FHL1/TUBA1A 2

GO:0043414 BP macromolecule methylation 4/1105 269/16241 0.99999237 1  
0.801260072 SMYD1/CTCF/PRDM12/TDRD5 4

GO:0006302 BP double-strand break repair 2/1105 210/16241 0.999994388 1  
0.801260072 FMN2/MCMDC2 2

GO:1901796 BP regulation of signal transduction by p53 class mediator 1/1105  
173/16241 0.99999525 1 0.801260072 HIC1 1

GO:0045333 BP cellular respiration 1/1105 175/16241 0.999995881 1 0.801260072  
NDUFC2-KCTD14 1

GO:0006605 BP protein targeting 9/1105 413/16241 0.999995994 1 0.801260072  
AKAP12/ITGB2/KCNB1/LTBP2/NLGN1/RTP5/AGXT/ZDHHC11/ZDHHC11B 9

GO:0009593 BP detection of chemical stimulus 11/1105 463/16241 0.999996319 1  
0.801260072  
CASQ2/CST2/KCNMB1/OR2W3/OR56B1/P2RX2/RTP5/SSC5D/TGFB3/FOXA2/TAS2R38 11

GO:1901990 BP regulation of mitotic cell cycle phase transition 8/1105 399/16241  
0.999997801 1 0.801260072  
ADAMTS1/DACT1/FGF10/FHL1/GPNMB/KCNA5/TUBA1A/TERT 8

GO:0006310 BP DNA recombination 3/1105 259/16241 0.999997917 1  
0.801260072 HFM1/PTPRC/MCMDC2 3

GO:0007606 BP sensory perception of chemical stimulus 11/1105 476/16241  
0.99999811 1 0.801260072  
CST2/NCAM2/OR2W3/OR56B1/P2RX2/REEP2/RTP5/OBP2B/P2RX3/TAS2R38/TRPM5 11

GO:0016579 BP protein deubiquitination 3/1105 270/16241 0.999998974 1  
0.801260072 AR/CCNA1/UCLH1 3

GO:0000086 BP G2/M transition of mitotic cell cycle 2/1105 239/16241 0.999999201  
1 0.801260072 FHL1/TUBA1A 2

GO:0006914 BP autophagy 10/1105 478/16241 0.999999532 1 0.801260072  
DCN/HSPB8/IL10RA/LIX1/MAP1LC3C/SOGA3/SYNPO2/UCLH1/ATP6V1C2/DAPL1 10

GO:0061919 BP process utilizing autophagic mechanism 10/1105 478/16241  
0.999999532 1 0.801260072  
DCN/HSPB8/IL10RA/LIX1/MAP1LC3C/SOGA3/SYNPO2/UCLH1/ATP6V1C2/DAPL1 10

GO:0000075 BP cell cycle checkpoint 1/1105 207/16241 0.99999958 1  
0.801260072 WNT9A 1

GO:0070646 BP protein modification by small protein removal 3/1105 286/16241  
0.999999636 1 0.801260072 AR/CCNA1/UCLH1 3

GO:0044839 BP cell cycle G2/M phase transition 2/1105 255/16241 0.999999729 1  
0.801260072 FHL1/TUBA1A 2

GO:0006839 BP mitochondrial transport 1/1105 223/16241 0.999999866 1  
0.801260072 CAMK2A 1

GO:0016569 BP covalent chromatin modification 8/1105 452/16241 0.999999887 1  
0.801260072 MYOCD/NAP1L2/PRKCB/SMYD1/APOBEC1/CTCF/PADI3/PRDM12 8

GO:0042254 BP ribosome biogenesis 2/1105 274/16241 0.999999926 1  
0.801260072 RPL3L/VCX 2

GO:0016570 BP histone modification 7/1105 435/16241 0.999999938 1  
0.801260072 MYOCD/NAP1L2/PRKCB/SMYD1/CTCF/PADI3/PRDM12 7

GO:0043161 BP proteasome-mediated ubiquitin-dependent protein catabolic process  
6/1105 407/16241 0.999999939 1 0.801260072  
MAP1A/PRICKLE1/UCHL1/WWTR1/RNF186/TRIM71 6

GO:0010498 BP proteasomal protein catabolic process 7/1105 459/16241 0.999999985  
1 0.801260072 APOE/MAP1A/PRICKLE1/UCHL1/WWTR1/RNF186/TRIM71 7

GO:0007005 BP mitochondrion organization 7/1105 472/16241 0.999999993 1  
0.801260072 AKT3/ATCAY/CAMK2A/DCN/IGF1/MAP1LC3C/TERT 7

GO:0034470 BP ncRNA processing 3/1105 349/16241 0.999999994 1 0.801260072  
CT45A10/CT45A5/LIN28B 3

GO:0050907 BP detection of chemical stimulus involved in sensory perception 5/1105  
428/16241 0.999999997 1 0.801260072 CST2/OR2W3/OR56B1/RTP5/TAS2R38 5

GO:0000377 BP RNA splicing, via transesterification reactions with bulged adenosine as  
nucleophile 2/1105 332/16241 0.999999999 1 0.801260072 CELF2/RBM24 2

GO:0000398 BP mRNA splicing, via spliceosome 2/1105 332/16241 0.999999999 1  
0.801260072 CELF2/RBM24 2

GO:0007608 BP sensory perception of smell 4/1105 406/16241 0.999999999 1  
0.801260072 NCAM2/OR2W3/OR56B1/OBP2B 4

GO:0000375 BP RNA splicing, via transesterification reactions 2/1105 335/16241  
0.999999999 1 0.801260072 CELF2/RBM24 2

GO:0006397 BP mRNA processing 6/1105 482/16241 0.999999999 1 0.801260072  
CELF2/CPEB1/QKI/RBM24/A1CF/APOBEC1 6

GO:0008380 BP RNA splicing 4/1105 419/16241 0.999999999 1 0.801260072  
AHNAK2/CELF2/QKI/RBM24 4

GO:0050911 BP detection of chemical stimulus involved in sensory perception of smell  
2/1105 379/16241 1 1 0.801260072 OR2W3/OR56B1 2

GO:0022613 BP ribonucleoprotein complex biogenesis 3/1105 434/16241 1 1  
0.801260072 CELF2/RPL3L/VCX 3

GO:0006281 BP DNA repair 3/1105 497/16241 1 1 0.801260072  
FGF10/FMN2/MCMDC2 3

GO:0005201 MF extracellular matrix structural constituent 63/1066 162/16208  
7.58E-33 6.06E-30 4.98E-30  
ABI3BP/ADIPOQ/AEBP1/ASPN/BGN/CILP/COL10A1/COL11A1/COL14A1/COL15A1/COL19A1/  
COL1A1/COL1A2/COL25A1/COL3A1/COL4A3/COL4A4/COL5A1/COL6A1/COL6A2/COL6A3/COL8A  
1/COL8A2/COMP/DCN/DPT/EFEMP1/EFEMP2/ELN/EMILIN1/FBLN1/FBLN2/FBLN5/FBN1/FGL2/F  
N1/HMCN1/LAMA2/LTBP1/LTBP2/LUM/MFAP4/MFAP5/MGP/MMRN1/OGN/PODN/PRELP/PRG4/  
SPARC/SPON1/THBS1/THBS2/TNC/TNXB/VCAN/FGA/FGB/FGG/HAPLN1/MUC17/MUC4/TECTB

GO:0005539 MF glycosaminoglycan binding 69/1066 219/16208 2.81E-29 1.12E-26  
9.23E-27

ABI3BP/ADAMTS1/ADAMTS8/ANXA6/APOE/BGN/CCDC80/COL11A1/COL25A1/COL5A1/COMP/CRISPLD2/CTSG/CXCL13/DCN/DPYSL3/ELANE/EPYC/FBN1/FGF10/FGF2/FGF7/FGFR1/FN1/FSTL1/GPNMB/GREM2/LAYN/LTBP2/MPO/NRP2/PLA2G2D/PRELP/PTPRC/PTPRS/RSP01/RSP02/RSP03/SELP/SFRP1/SLIT2/SLIT3/SMOC2/SOD3/SPOCK3/SULF1/SUSD5/THBS1/THBS2/THBS4/TNXB/VCAN/VIT/APOA5/APOH/BMP7/CCL15/CEL/F2/FGFBP1/HAPLN1/HRG/PGLYRP3/PGLYRP4/REG1A/REG1B/REG3A/REG3G/SERPINA10 69

GO:0008201 MF heparin binding 51/1066 160/16208 3.41E-22 9.09E-20 7.47E-20

ABI3BP/ADAMTS1/ADAMTS8/APOE/CCDC80/COL11A1/COL25A1/COL5A1/COMP/CRISPLD2/CTSG/CXCL13/ELANE/FBN1/FGF10/FGF2/FGF7/FGFR1/FN1/FSTL1/GPNMB/GREM2/LTBP2/MPO/NRP2/PLA2G2D/PRELP/PTPRC/PTPRS/RSP01/RSP02/RSP03/SELP/SFRP1/SLIT2/SLIT3/SMOC2/SOD3/THBS1/THBS2/THBS4/TNXB/APOA5/APOH/BMP7/CCL15/CEL/F2/FGFBP1/HRG/SERPINA10 51

GO:1901681 MF sulfur compound binding 53/1066 238/16208 2.02E-15 4.04E-13  
3.32E-13

ABI3BP/ADAMTS1/ADAMTS8/ANXA6/APOE/CCDC80/COL11A1/COL25A1/COL5A1/COMP/CRISPLD2/CTSG/CXCL13/DPYSL3/ELANE/FBN1/FGF10/FGF2/FGF7/FGFR1/FN1/FSTL1/GPNMB/GREM2/LTBP2/MPO/NRP2/PLA2G2D/PRELP/PTPRC/PTPRS/RSP01/RSP02/RSP03/SELP/SFRP1/SLIT2/SLIT3/SMOC2/SOD3/THBS1/THBS2/THBS4/TNXB/APOA5/APOH/BMP7/CCL15/CEL/F2/FGFBP1/HRG/SERPINA10 53

GO:0048018 MF receptor ligand activity 72/1066 459/16208 3.8E-12 6.07E-10  
4.99E-10

ADCYAP1/ADIPOQ/C1QTNF4/CARTPT/CCL13/CCL14/CCL19/CCL21/CMTM3/CMTM5/CXCL12/CXCL13/CXCL9/DKK1/EFEMP1/EPHA7/FBN1/FGF10/FGF14/FGF2/FGF5/FGF7/FLRT2/GDF10/GDF5/GDF6/GPNMB/GREM1/GREM2/GRP/IGF1/IL12B/IL21/NGF/NPPC/NPY/NRG3/OGN/PENK/PNOC/RETN/SFRP2/SPX/TGFB3/THBS4/TNFSF8/VIP/WNT9A/WNT9B/APOA1/BMP7/C10orf99/CCL15/CCL20/DEFB4A/EPO/F2/FGF23/GAST/GUCA2A/IL17A/IL17F/IL22/IL36G/IL36RN/IL37/NPFF/REG1A/RETNLB/SAA2/SAA4/TTR 72

GO:0030020 MF extracellular matrix structural constituent conferring tensile strength 17/1066  
41/16208 2.39E-10 3.18E-08 2.61E-08

COL10A1/COL11A1/COL14A1/COL15A1/COL19A1/COL1A1/COL1A2/COL25A1/COL3A1/COL4A3/COL4A4/COL5A1/COL6A1/COL6A2/COL6A3/COL8A1/COL8A2 17

GO:0005178 MF integrin binding 28/1066 125/16208 7.54E-09 0.000000861  
0.000000708

ACTN2/ADAMTS8/COL3A1/COL4A3/COL5A1/COMP/CXCL12/EMILIN1/FBLN5/FBN1/FCER2/FGF2/FN1/GPNMB/IGF1/ITGB2/ITGBL1/JAM3/S1PR3/SFRP2/THBS1/THBS4/THY1/TIMP2/TNN/TNXB/VCAM1/CDH17 28

GO:0005518 MF collagen binding 18/1066 67/16208 0.000000197 0.0000185  
0.0000152

ABI3BP/AEBP1/ANTXR1/ASPN/COL14A1/COMP/DCN/DDR2/FN1/ITGA11/LUM/MRC2/PODNL/SPARC/SPARCL1/SPOCK1/SPOCK3/THBS1 18

GO:0030246 MF carbohydrate binding 41/1066 263/16208 0.000000208 0.0000185

0.0000152  
CD22/CHODL/CLC/CLEC10A/CLEC17A/CLEC1B/CLEC2L/CLEC4C/CLEC4G/CLEC6A/CLEC9A/CLE  
CL1/CNTN1/COLEC12/FCER2/FCN1/KLRC3/KLRC4-KLRK1/KRT1/LAYN/LGALS12/MAG/MRC1/MRC  
2/PRG4/SELP/SIGLEC1/SIGLEC10/SIGLEC6/SIGLEC8/VCAN/ITLN2/KLRG2/LGALS7B/REG1A/REG1B/  
REG3A/REG3G/SI/TINAG/ZG16 41  
GO:0001664 MF G protein-coupled receptor binding 41/1066 270/16208 0.000000428  
0.0000329 0.0000271  
ADCYAP1/AGTR1/CCL13/CCL14/CCL19/CCL21/CCR2/CXCL12/CXCL13/CXCL9/FCN1/FLNA/GN  
AO1/MYOC/NPY/PENK/PNOC/PTCH2/REEP2/ROR2/RSP01/RSP02/RSP03/RTP5/SFRP1/SHANK1/T  
AC1/TAC4/TUB/UCHL1/WNT9A/WNT9B/C10orf99/CCL15/CCL20/DEFB1/DEFB4A/KISS1/NPFF/PP  
P1R1B/S100A14 41  
GO:0030021 MF extracellular matrix structural constituent conferring compression resistance  
10/1066 22/16208 0.000000453 0.0000329 0.0000271  
ASPEN/BGN/DCN/LUM/OGN/PODN/PRELP/PRG4/VCAN/HAPLN1 10  
GO:0019838 MF growth factor binding 25/1066 130/16208 0.00000104 0.0000696  
0.0000572  
A2M/COL1A1/COL1A2/COL3A1/COL5A1/COL6A1/CXCL13/FGFR1/GHR/HTRA3/IGFBP4/IGFB  
P5/IGFBPL1/IL10RA/LRR32/LTBP1/LTBP2/NGFR/NRP2/NTRK2/PDGFRB/TGFB3/THBS1/FGFBP1/IL  
36RN 25  
GO:0043394 MF proteoglycan binding 12/1066 35/16208 0.00000125 0.0000767  
0.000063  
APOE/COL5A1/COMP/FN1/GPNMB/PLA2G2D/PTPRC/PTPRS/SLIT2/THBS1/TNC/HRG 12  
GO:0019955 MF cytokine binding 24/1066 127/16208 0.00000236 0.000134837  
0.000110847  
A2M/ACKR1/CCR2/CCR4/CCR7/CCR8/COMP/CSF1R/ELANE/GDF5/GHR/GREM1/GREM2/IL10  
RA/IL12B/IL31RA/LRR32/LTBP1/NRP2/TGFB3/THBS1/XCR1/IL17F/IL36RN24  
GO:0001653 MF peptide receptor activity 26/1066 149/16208 0.0000043 0.000226267  
0.00018601  
ADCYAP1R1/AGTR1/AGTR2/CCKAR/CCR2/CCR4/CCR7/CCR8/CMKLR1/EDNRA/FPR3/GLP2R/G  
RPR/HCTR1/MLNR/NPR3/NPY1R/NPY5R/SORCS1/SORCS2/SORCS3/TACR1/TACR2/VIPR2/XCR1/  
GUCY2C 26  
GO:0030414 MF peptidase inhibitor activity 29/1066 177/16208 0.00000453  
0.000226267 0.00018601  
A2M/COL4A3/COL6A3/CST2/CST5/HMSD/ITIH5/NGF/PI16/PZP/SERPINA3/SERPINE1/SERPIN  
F1/SERPING1/SPOCK1/SPOCK3/TIMP2/TIMP3/AMBP/CARD18/CSTL1/HRG/PI3/R3HDML/SERPINA  
10/SERPINB13/SPINK4/WFDC10A/WFDC12 29  
GO:0022839 MF ion gated channel activity 44/1066 329/16208 0.00000544  
0.000255864 0.000210341  
ANXA6/CACNA1G/CACNG7/CHRNA3/CHRNA6/CNGA3/CNR1/CYBB/GABRA5/GRIA1/GRIK3/  
GRIK5/HTR3A/JPH2/JPH4/KCNA1/KCNA2/KCNA4/KCNA5/KCNB1/KCNE4/KCNIP1/KCNJ5/KCNK2/K  
CNK3/KCNK4/KCNMA1/KCNMB1/KCNQ5/LRR38/NALCN/P2RX2/SCN11A/SCN2B/SCN7A/CLCA4/  
CNGB3/GABRA4/KCNK10/KCNV1/NOX1/P2RX3/TRPM5/ZACN 44  
GO:0008528 MF G protein-coupled peptide receptor activity 25/1066 143/16208  
0.00000631 0.000280178 0.000230329

ADCYAP1R1/AGTR1/AGTR2/CCKAR/CCR2/CCR4/CCR7/CCR8/CMKLR1/EDNRA/FPR3/GLP2R/G  
RPR/HCTR1/MLNR/NPR3/NPY1R/NPY5R/SORCS1/SORCS2/SORCS3/TACR1/TACR2/VIPR2/XCR1  
25

GO:0061134 MF peptidase regulator activity 32/1066 211/16208 0.00000797  
0.000335138 0.00027551

A2M/COL4A3/COL6A3/CST2/CST5/FBLN1/FN1/HMSD/ITIH5/NGF/PI16/PZP/SERPINA3/SERPI  
NE1/SERPINF1/SERPING1/SFRP2/SPOCK1/SPOCK3/TIMP2/TIMP3/AMBP/CARD18/CSTL1/HRG/PI3  
/R3HDML/SERPINA10/SERPINB13/SPINK4/WFDC10A/WFDC12 32

GO:0004714 MF transmembrane receptor protein tyrosine kinase activity 15/1066  
62/16208 0.0000084 0.000335703 0.000275974

ALK/AXL/CSF1R/DDR2/EFEMP1/EPHA3/EPHA5/EPHA6/EPHA7/FGFR1/FLT3/NRP2/NTRK2/PD  
GFRB/ROR2 15

GO:0022836 MF gated channel activity 44/1066 338/16208 0.0000109 0.000415512  
0.000341584

ANXA6/CACNA1G/CACNG7/CHRNA3/CHRNA6/CNGA3/CNR1/CYBB/GABRA5/GRIA1/GRIK3/  
GRIK5/HTR3A/JPH2/JPH4/KCNA1/KCNA2/KCNA4/KCNA5/KCNB1/KCNE4/KCNIP1/KCNJ5/KCNK2/K  
CNK3/KCNK4/KCNMA1/KCNMB1/KCNQ5/LRRC38/NALCN/P2RX2/SCN11A/SCN2B/SCN7A/CLCA4/  
CNGB3/GABRA4/KCNK10/KCNV1/NOX1/P2RX3/TRPM5/ZACN 44

GO:0061135 MF endopeptidase regulator activity 28/1066 176/16208 0.0000117  
0.000423664 0.000348286

A2M/COL4A3/COL6A3/CST2/CST5/HMSD/ITIH5/NGF/PZP/SERPINA3/SERPINE1/SERPINF1/SE  
RPING1/SFRP2/SPOCK1/SPOCK3/TIMP2/TIMP3/AMBP/CARD18/CSTL1/HRG/PI3/SERPINA10/SERP  
INB13/SPINK4/WFDC10A/WFDC12 28

GO:0015079 MF potassium ion transmembrane transporter activity 26/1066 158/16208  
0.0000128 0.000430252 0.000353701

ABCC9/ATP1A2/ATP1A4/GRIK3/GRIK5/KCNA1/KCNA2/KCNA4/KCNA5/KCNB1/KCNE4/KCNIP1  
/KCNJ5/KCNK2/KCNK3/KCNK4/KCNMA1/KCNMB1/KCNQ5/LRRC38/SLC12A3/FXYD4/KCNK10/KCN  
V1/SLC9A2/TRPM5 26

GO:0005125 MF cytokine activity 32/1066 216/16208 0.000013 0.000430252  
0.000353701

ADIPOQ/C1QTNF4/CCL13/CCL14/CCL19/CCL21/CMTM3/CMTM5/CXCL12/CXCL13/CXCL9/FG  
F2/GDF10/GDF5/GDF6/GREM1/GREM2/IL12B/IL21/TGFB3/TNFSF8/BMP7/C10orf99/CCL15/CCL2  
0/EPO/IL17A/IL17F/IL22/IL36G/IL36RN/IL37 32

GO:0005267 MF potassium channel activity 22/1066 122/16208 0.0000135  
0.000430252 0.000353701

ABCC9/GRIK3/GRIK5/KCNA1/KCNA2/KCNA4/KCNA5/KCNB1/KCNE4/KCNIP1/KCNJ5/KCNK2/K  
CNK3/KCNK4/KCNMA1/KCNMB1/KCNQ5/LRRC38/FXYD4/KCNK10/KCNV1/TRPM5 22

GO:0004866 MF endopeptidase inhibitor activity 27/1066 170/16208 0.0000171  
0.000526785 0.00043306

A2M/COL4A3/COL6A3/CST2/CST5/HMSD/ITIH5/NGF/PZP/SERPINA3/SERPINE1/SERPINF1/SE  
RPING1/SPOCK1/SPOCK3/TIMP2/TIMP3/AMBP/CARD18/CSTL1/HRG/PI3/SERPINA10/SERPINB13/  
SPINK4/WFDC10A/WFDC12 27

GO:0005261 MF cation channel activity 41/1066 314/16208 0.0000201 0.000594483  
0.000488713

ABCC9/ANXA6/CACNA1G/CACNG7/CHRNA3/CHRNA6/CNGA3/CNR1/GPM6A/GRIA1/GRIK3/  
 GRIK5/HTR3A/JPH2/JPH4/KCNA1/KCNA2/KCNA4/KCNA5/KCNB1/KCNE4/KCNIP1/KCNJ5/KCNK2/K  
 CNK3/KCNK4/KCNMA1/KCNMB1/KCNQ5/LRRC38/NALCN/P2RX2/SCN11A/SCN2B/SCN7A/CNGB3/  
 FXYP4/KCNK10/KCNV1/P2RX3/TRPM5 41  
 GO:0008329 MF signaling pattern recognition receptor activity 8/1066 20/16208  
 0.0000211 0.000600934 0.000494016  
 COLEC12/FCN1/TLR7/TLR8/TLR9/DMBT1/PGLYRP3/PGLYRP4 8  
 GO:0004867 MF serine-type endopeptidase inhibitor activity 18/1066 92/16208 0.0000259  
 0.00071271 0.000585905  
 A2M/COL6A3/HMSD/ITIH5/PZP/SERPINA3/SERPINE1/SERPINF1/SERPING1/SPOCK1/AMBP/H  
 RG/PI3/SERPINA10/SERPINB13/SPINK4/WFDC10A/WFDC12 18  
 GO:0048407 MF platelet-derived growth factor binding 6/1066 11/16208 0.0000277  
 0.000737063 0.000605925 COL1A1/COL1A2/COL3A1/COL5A1/COL6A1/PDGFRB 6  
 GO:0038187 MF pattern recognition receptor activity 8/1066 21/16208 0.0000321  
 0.00082636 0.000679335 COLEC12/FCN1/TLR7/TLR8/TLR9/DMBT1/PGLYRP3/PGLYRP4  
 8  
 GO:0005184 MF neuropeptide hormone activity 9/1066 27/16208 0.0000354  
 0.000883473 0.000726286 ADCYAP1/CARTPT/GRP/NPY/PENK/PNOC/SPX/VIP/NPFF 9  
 GO:0031406 MF carboxylic acid binding 28/1066 187/16208 0.0000365 0.000884101  
 0.000726802  
 ADIPOQ/CD22/DPYS/FABP4/FCN1/FOLR2/LAYN/MAG/PMP2/PTGDS/SELP/ST8SIA2/SUSD5/V  
 CAN/AGXT/DDC/FABP1/FABP2/FOLR1/HAPLN1/LCN12/OTC/PCK1/UGT1A1/UGT1A3/UGT1A7/UG  
 T1A8/UGT1A9 28  
 GO:0042379 MF chemokine receptor binding 14/1066 62/16208 0.0000385 0.000894613  
 0.000735443  
 CCL13/CCL14/CCL19/CCL21/CCR2/CXCL12/CXCL13/CXCL9/C10orf99/CCL15/CCL20/DEFB1/D  
 EFB4A/S100A14 14  
 GO:0019199 MF transmembrane receptor protein kinase activity 16/1066 78/16208  
 0.0000392 0.000894613 0.000735443  
 ALK/AXL/CSF1R/DDR2/EFEMP1/EPHA3/EPHA5/EPHA6/EPHA7/FGFR1/FLT3/LTBP1/NRP2/NT  
 RK2/PDGFRB/ROR2 16  
 GO:0033691 MF sialic acid binding 6/1066 12/16208 0.0000523 0.001159968  
 0.000953587 ADIPOQ/CD22/FCN1/MAG/SELP/ST8SIA2 6  
 GO:0019865 MF immunoglobulin binding 8/1066 23/16208 0.0000686 0.001482066  
 0.001218377 CD22/FCER1A/FCER2/FCGR2B/FCGR3A/MS4A1/AMBP/HRG 8  
 GO:0043177 MF organic acid binding 28/1066 199/16208 0.000111563 0.002345755  
 0.001928399  
 ADIPOQ/CD22/DPYS/FABP4/FCN1/FOLR2/LAYN/MAG/PMP2/PTGDS/SELP/ST8SIA2/SUSD5/V  
 CAN/AGXT/DDC/FABP1/FABP2/FOLR1/HAPLN1/LCN12/OTC/PCK1/UGT1A1/UGT1A3/UGT1A7/UG  
 T1A8/UGT1A9 28  
 GO:0099106 MF ion channel regulator activity 19/1066 112/16208 0.000120304  
 0.002464688 0.002026172  
 ABCC9/CACNG7/DPP6/FLNA/FXYD6/HPCAL4/KCNE4/KCNIP1/KCNMB1/LRRC38/NPY/NRXN2/  
 PLN/PRKCB/AMBP/FXYD4/KCNV1/PCSK9/PDZD3 19

GO:0070325 MF lipoprotein particle receptor binding 8/1066 25/162080.000134524  
0.002687122 0.00220903 APOE/DKK1/RELN/APOA1/APOA2/APOA5/APOC3/PCSK9 8

GO:0046873 MF metal ion transmembrane transporter activity 49/1066 433/16208  
0.000140063 0.002729518 0.002243883  
ABCC9/ANXA6/ATP1A2/ATP1A4/ATP2B2/CACNA1G/CACNG7/CNR1/GPM6A/GRIK3/GRIK5/JPH2/JPH4/KCNA1/KCNA2/KCNA4/KCNA5/KCNB1/KCNE4/KCNIP1/KCNJ5/KCNK2/KCNK3/KCNK4/KCNMA1/KCNMB1/KCNQ5/LRRC38/NALCN/NIPAL4/SCN11A/SCN2B/SCN7A/SLC12A3/SLC6A17/SLC6A2/SLC8A1/ATP2C2/FXYD4/KCNK10/KCNV1/SLC13A2/SLC17A4/SLC28A2/SLC30A10/SLC34A3/SLC6A7/SLC9A2/TRPM5 49

GO:0015077 MF monovalent inorganic cation transmembrane transporter activity 42/1066  
356/16208 0.000167659 0.003189508 0.002622032  
ABCC9/ATP1A2/ATP1A4/GRIK3/GRIK5/KCNA1/KCNA2/KCNA4/KCNA5/KCNB1/KCNE4/KCNIP1/KCNJ5/KCNK2/KCNK3/KCNK4/KCNMA1/KCNMB1/KCNQ5/LRRC38/NALCN/SCN11A/SCN2B/SCN7A/SLC12A3/SLC6A17/SLC6A2/SLC8A1/ATP2C2/ATP6V1C2/COX7B2/FXYD4/KCNK10/KCNV1/SLC13A2/SLC17A4/SLC28A2/SLC34A3/SLC45A2/SLC6A7/SLC9A2/TRPM5 42

GO:0005179 MF hormone activity 19/1066 115/16208 0.000172401 0.003203449  
0.002633492  
ADCYAP1/ADIPOQ/CARTPT/FBN1/GRP/IGF1/NPPC/NPY/PENK/PNOC/RETN/SPX/VIP/EPO/GAST/GUCA2A/NPFF/RETNLB/TTR 19

GO:0015267 MF channel activity 50/1066 449/16208 0.000178248 0.003236821  
0.002660926  
ABCC9/ANXA6/CACNA1G/CACNG7/CHRNA3/CHRNA6/CNGA3/CNR1/CYBB/GABRA5/GPM6A/GRIA1/GRIK3/GRIK5/HTR3A/JPH2/JPH4/KCNA1/KCNA2/KCNA4/KCNA5/KCNB1/KCNE4/KCNIP1/KCNJ5/KCNK2/KCNK3/KCNK4/KCNMA1/KCNMB1/KCNQ5/LRRC18/LRRC38/NALCN/P2RX2/SCN11A/SCN2B/SCN7A/AQP12A/AQP12B/CLCA4/CNGB3/FXYD4/GABRA4/KCNK10/KCNV1/NOX1/P2RX3/TRPM5/ZACN 50

GO:0022803 MF passive transmembrane transporter activity 50/1066 450/16208  
0.000188117 0.003340117 0.002745844  
ABCC9/ANXA6/CACNA1G/CACNG7/CHRNA3/CHRNA6/CNGA3/CNR1/CYBB/GABRA5/GPM6A/GRIA1/GRIK3/GRIK5/HTR3A/JPH2/JPH4/KCNA1/KCNA2/KCNA4/KCNA5/KCNB1/KCNE4/KCNIP1/KCNJ5/KCNK2/KCNK3/KCNK4/KCNMA1/KCNMB1/KCNQ5/LRRC18/LRRC38/NALCN/P2RX2/SCN11A/SCN2B/SCN7A/AQP12A/AQP12B/CLCA4/CNGB3/FXYD4/GABRA4/KCNK10/KCNV1/NOX1/P2RX3/TRPM5/ZACN 50

GO:0050840 MF extracellular matrix binding 12/1066 55/162080.000193042 0.003351732  
0.002755393  
BGN/COL11A1/DCN/ELN/FBLN2/SLIT2/SPARC/SPARCL1/SPOCK1/SPOCK3/SSC5D/THBS1 12

GO:0048020 MF CCR chemokine receptor binding 10/1066 40/162080.000200196  
0.003351732 0.002755393  
CCL13/CCL14/CCL19/CCL21/CCR2/CXCL13/CCL15/CCL20/DEFB1/DEFB4A 10

GO:0004857 MF enzyme inhibitor activity 42/1066 359/16208 0.000201356  
0.003351732 0.002755393  
A2M/COL4A3/COL6A3/CST2/CST5/HMSD/ITIH5/NGF/PI16/PLN/PZP/SERPINA3/SERPINE1/SERPINF1/SERPING1/SLIT2/SPOCK1/SPOCK3/TIMP2/TIMP3/AMBP/APOA1/APOA2/APOC3/CARD18/CSTL1/HRG/PI3/PPP1R14C/PPP1R14D/PPP1R1B/PPP1R27/R3HDM1/SCGB1A1/SERPINA10/SERPI

NB13/SPINK4/UGT1A1/UGT1A7/UGT1A8/WFDC10A/WFDC12 42

GO:0070492 MF oligosaccharide binding 6/1066 15/162080.000238455 0.003888284  
0.003196481 LGALS12/SELP/REG1A/REG1B/REG3A/REG3G 6

GO:0005216 MF ion channel activity 46/1066 410/16208 0.000269433 0.004305547  
0.003539505

ABCC9/ANXA6/CACNA1G/CACNG7/CHRNA3/CHRNA6/CNGA3/CNR1/GABRA5/GPM6A/GRIA  
1/GRIK3/GRIK5/HTR3A/JPH2/JPH4/KCNA1/KCNA2/KCNA4/KCNA5/KCNB1/KCNE4/KCNIP1/KCNJ5/  
KCNK2/KCNK3/KCNK4/KCNMA1/KCNMB1/KCNQ5/LRRC18/LRRC38/NALCN/P2RX2/SCN11A/SCN2  
B/SCN7A/CLCA4/CNGB3/FXYD4/GABRA4/KCNK10/KCNV1/P2RX3/TRPM5/ZACN 46

GO:0005501 MF retinoid binding 9/1066 35/162080.000330738 0.005181558  
0.004259657 PTGDS/ADH7/LCN12/RBP2/UGT1A1/UGT1A3/UGT1A7/UGT1A8/UGT1A9 9

GO:0008191 MF metalloendopeptidase inhibitor activity 6/1066 16/162080.000360372  
0.005332177 0.004383477 COL4A3/NGF/SPOCK1/SPOCK3/TIMP2/TIMP3 6

GO:0042834 MF peptidoglycan binding 6/1066 16/162080.000360372 0.005332177  
0.004383477 PGLYRP3/PGLYRP4/REG1A/REG1B/REG3A/REG3G6

GO:0043395 MF heparan sulfate proteoglycan binding 6/1066 16/162080.000360372  
0.005332177 0.004383477 APOE/COMP/PLA2G2D/PTPRC/PTPRS/HRG 6

GO:0005244 MF voltage-gated ion channel activity 26/1066 193/16208 0.000387433  
0.005527837 0.004544325

CACNA1G/CACNG7/CNR1/CYBB/KCNA1/KCNA2/KCNA4/KCNA5/KCNB1/KCNE4/KCNIP1/KCNJ  
5/KCNK2/KCNK3/KCNK4/KCNMA1/KCNQ5/LRRC38/NALCN/SCN11A/SCN2B/SCN7A/KCNK10/KCN  
V1/NOX1/TRPM5 26

GO:0022832 MF voltage-gated channel activity 26/1066 193/16208 0.000387433  
0.005527837 0.004544325

CACNA1G/CACNG7/CNR1/CYBB/KCNA1/KCNA2/KCNA4/KCNA5/KCNB1/KCNE4/KCNIP1/KCNJ  
5/KCNK2/KCNK3/KCNK4/KCNMA1/KCNQ5/LRRC38/NALCN/SCN11A/SCN2B/SCN7A/KCNK10/KCN  
V1/NOX1/TRPM5 26

GO:0097493 MF structural molecule activity conferring elasticity 5/1066 11/16208  
0.000403052 0.005649792 0.004644583 ELN/EMILIN1/FBLN2/FBLN5/FBN1 5

GO:0019840 MF isoprenoid binding 9/1066 36/162080.000415528 0.005724259  
0.0047058 PTGDS/ADH7/LCN12/RBP2/UGT1A1/UGT1A3/UGT1A7/UGT1A8/UGT1A9 9

GO:0022838 MF substrate-specific channel activity 46/1066 422/16208 0.000510499  
0.006913368 0.005683344

ABCC9/ANXA6/CACNA1G/CACNG7/CHRNA3/CHRNA6/CNGA3/CNR1/GABRA5/GPM6A/GRIA  
1/GRIK3/GRIK5/HTR3A/JPH2/JPH4/KCNA1/KCNA2/KCNA4/KCNA5/KCNB1/KCNE4/KCNIP1/KCNJ5/  
KCNK2/KCNK3/KCNK4/KCNMA1/KCNMB1/KCNQ5/LRRC18/LRRC38/NALCN/P2RX2/SCN11A/SCN2  
B/SCN7A/CLCA4/CNGB3/FXYD4/GABRA4/KCNK10/KCNV1/P2RX3/TRPM5/ZACN 46

GO:0008083 MF growth factor activity 22/1066 156/16208 0.000564232 0.007513687  
0.006176854

CXCL12/DKK1/EFEMP1/FGF10/FGF14/FGF2/FGF5/FGF7/GDF10/GDF5/GDF6/IGF1/IL12B/NG  
F/NRG3/OGN/TGFB3/THBS4/BMP7/F2/FGF23/REG1A 22

GO:0016247 MF channel regulator activity 20/1066 138/16208 0.000695027  
0.009103718 0.007483987

ABCC9/CACNG7/DPP6/FLNA/FXYD6/HPCAL4/KCNE4/KCNIP1/KCNMB1/LRRC38/NPY/NRXN2/

PLN/PRKCB/SCN2B/AMBP/FXYD4/KCNV1/PCSK9/PDZD3 20  
 GO:0008009 MF chemokine activity 10/1066 47/162080.000803825 0.010358967  
 0.008515902 CCL13/CCL14/CCL19/CCL21/CXCL12/CXCL13/CXCL9/C10orf99/CCL15/CCL20  
 10  
 GO:0001972 MF retinoic acid binding 6/1066 19/162080.001029406 0.013055485  
 0.010732656 LCN12/UGT1A1/UGT1A3/UGT1A7/UGT1A8/UGT1A9 6  
 GO:0001968 MF fibronectin binding 7/1066 26/162080.001134103 0.014158565  
 0.011639476 CCDC80/FBLN1/IGFBP5/MYOC/SFRP2/SSC5D/THBS1 7  
 GO:0004497 MF monooxygenase activity 15/1066 95/162080.001301284 0.015995786  
 0.013149819  
 CYP1B1/CYP7B1/FMO1/FMO2/MOXD1/PTGIS/AKR1C4/CYP2B6/CYP2C19/CYP2J2/CYP3A4/C  
 YP3A43/CYP4F2/CYP4F8/PAH15  
 GO:0020037 MF heme binding 18/1066 127/16208 0.001629823 0.019730737  
 0.016220249  
 CYBB/CYP1B1/CYP7B1/IDO2/MPO/NGB/PTGIS/TPO/AMBP/CYP2B6/CYP2C19/CYP2J2/CYP3A  
 4/CYP3A43/CYP4F2/CYP4F8/DUOX2/HRG 18  
 GO:0004181 MF metallopeptidase activity 7/1066 28/162080.001818881  
 0.021062119 0.017314751 AEBP1/CPO/CPXM1/CPXM2/CPZ/CPA2/CPN1 7  
 GO:0071813 MF lipoprotein particle binding 7/1066 28/162080.001818881 0.021062119  
 0.017314751 APOE/COLEC12/GPIHBP1/THBS1/APOA1/APOA2/PCSK9 7  
 GO:0071814 MF protein-lipid complex binding 7/1066 28/162080.001818881 0.021062119  
 0.017314751 APOE/COLEC12/GPIHBP1/THBS1/APOA1/APOA2/PCSK9 7  
 GO:0042056 MF chemoattractant activity 8/1066 36/162080.001972977 0.022520119  
 0.018513344 FGF10/FGF2/FGF7/GPNMB/CCL15/DEFB4A/SAA2/SAA4 8  
 GO:0050839 MF cell adhesion molecule binding 47/1066 465/16208 0.002186767  
 0.024608828 0.020230431  
 ACTN2/ADAMTS8/CALD1/CDH10/CDH11/CDH19/CDH2/COL3A1/COL4A3/COL5A1/COMP/CT  
 NNA3/CXCL12/EMILIN1/FBLN5/FBN1/FCER2/FGF2/FLNA/FN1/GPNMB/HMCN1/IGF1/ITGB2/ITGB  
 L1/JAM3/LRRC4C/NLGN1/NRXN2/NRXN3/NTNG1/S1PR3/SFRP2/TENM3/TENM4/THBS1/THBS4/T  
 HY1/TIMP2/TNN/TNXB/VCAM1/CDH17/FGA/FGB/FGG/OLFM4 47  
 GO:0033293 MF monocarboxylic acid binding 11/1066 63/162080.00247275 0.027440655  
 0.02255842  
 FABP4/PMP2/PTGDS/FABP1/FABP2/LCN12/UGT1A1/UGT1A3/UGT1A7/UGT1A8/UGT1A911  
 GO:0005126 MF cytokine receptor binding 31/1066 278/16208 0.002780267  
 0.02985503 0.02454323  
 CCL13/CCL14/CCL19/CCL21/CCR2/CXCL12/CXCL13/CXCL9/GDF10/GDF5/GDF6/GREM1/IL12  
 B/IL21/NGF/TGFB3/TLR9/TNFSF8/BMP7/C10orf99/CCL15/CCL20/DEFB1/DEFB4A/EPO/IL17F/IL22  
 /IL36G/IL36RN/IL37/S100A1431  
 GO:0016712 MF oxidoreductase activity, acting on paired donors, with incorporation or  
 reduction of molecular oxygen, reduced flavin or flavoprotein as one donor, and incorporation of  
 one atom of oxygen 7/1066 30/162080.002787224 0.02985503 0.02454323  
 CYP1B1/CYP2B6/CYP2C19/CYP2J2/CYP3A4/CYP3A43/CYP4F8 7  
 GO:0036122 MF BMP binding 4/1066 10/162080.002834873 0.02985503 0.02454323  
 COMP/GDF5/GREM1/GREM24

GO:0002020 MF protease binding 17/1066 123/16208 0.002839778 0.02985503  
0.02454323  
A2M/COL1A1/COL1A2/COL3A1/COMP/ELANE/FN1/PZP/SERPINE1/TIMP2/TIMP3/ALPI/CARD  
18/LCN2/MAGEA3/PDZD3/SERPINB13 17

GO:0120013 MF intermembrane lipid transfer activity 6/1066 23/162080.003053943  
0.031689616 0.026051407 APOE/APOA1/APOA2/APOA4/APOA5/MTTP 6

GO:0046906 MF tetrapyrrole binding 18/1066 135/16208 0.00323024 0.033089258  
0.027202025  
CYBB/CYP1B1/CYP7B1/IDO2/MPO/NGB/PTGIS/TPO/AMBP/CYP2B6/CYP2C19/CYP2J2/CYP3A  
4/CYP3A43/CYP4F2/CYP4F8/DUOX2/HRG 18

GO:0005109 MF frizzled binding 8/1066 39/162080.003367545 0.03394878  
0.027908621 MYOC/ROR2/RSPO1/RSPO2/RSPO3/SFRP1/WNT9A/WNT9B 8

GO:0071855 MF neuropeptide receptor binding 7/1066 31/162080.003399127  
0.03394878 0.027908621 ADCYAP1/GNAO1/NPY/SHANK1/TAC1/TAC4/KISS1 7

GO:0005496 MF steroid binding 14/1066 95/162080.003587803 0.035390802  
0.029094079  
ANXA6/APOE/AR/ATP1A2/HSD11B1/PMP2/APOA1/APOA2/APOA4/APOA5/APOC3/CYP3A4/  
UGT1A1/UGT1A8 14

GO:0019957 MF C-C chemokine binding 6/1066 24/162080.003848628 0.037500653  
0.030828546 ACKR1/CCR2/CCR4/CCR7/CCR8/XCR1 6

GO:0005249 MF voltage-gated potassium channel activity 13/1066 86/162080.003936393  
0.037893707 0.031151668  
KCNA1/KCNA2/KCNA4/KCNA5/KCNB1/KCNE4/KCNJ5/KCNK2/KCNK3/KCNMA1/KCNQ5/LRRC3  
8/KCNV1 13

GO:0005251 MF delayed rectifier potassium channel activity 7/1066 32/162080.004108215  
0.038617223 0.031746455 KCNA1/KCNA2/KCNA4/KCNA5/KCNB1/KCNE4/KCNQ5 7

GO:0019956 MF chemokine binding 7/1066 32/162080.004108215 0.038617223  
0.031746455 A2M/ACKR1/CCR2/CCR4/CCR7/CCR8/XCR1 7

GO:0015081 MF sodium ion transmembrane transporter activity 19/1066 149/16208  
0.004171152 0.038752912 0.031858003  
ATP1A2/ATP1A4/GRIK3/GRIK5/NALCN/SCN11A/SCN2B/SCN7A/SLC12A3/SLC6A17/SLC6A2/S  
LC8A1/SLC13A2/SLC17A4/SLC28A2/SLC34A3/SLC6A7/SLC9A2/TRPM5 19

GO:0005104 MF fibroblast growth factor receptor binding 6/1066 25/162080.004786694  
0.043960554 0.036139103 FGF10/FGF2/FGF5/FGF7/FLRT2/FGF23 6

GO:0017127 MF cholesterol transporter activity 5/1066 18/162080.005077633  
0.045584594 0.037474193 APOE/APOA1/APOA2/APOA4/APOA5 5

GO:0120020 MF intermembrane cholesterol transfer activity 5/1066 18/162080.005077633  
0.045584594 0.037474193 APOE/APOA1/APOA2/APOA4/APOA5 5

GO:0001637 MF G protein-coupled chemoattractant receptor activity 6/1066 26/16208  
0.005882471 0.051649387 0.04245994 CCR2/CCR4/CCR7/CCR8/CMKLR1/XCR1 6

GO:0004950 MF chemokine receptor activity 6/1066 26/162080.005882471 0.051649387  
0.04245994 CCR2/CCR4/CCR7/CCR8/CMKLR1/XCR1 6

GO:0046982 MF protein heterodimerization activity 41/1066 416/16208 0.006232296  
0.05412614 0.04449603

ADCY2/ADCY5/ADD2/AGTR1/AOC3/AXL/CEBPE/CFHR1/CXCL13/CYBB/FOXP2/HAND2/HEYL/I  
 L12B/ITGB2/JAM3/KCNB1/KRT1/NEFL/NPAS3/PVALB/SYT4/TBX18/TENM3/TENM4/TGFB3/TPM2/  
 APOA2/CREB3L3/MLXIPL/MTTP/NEUROD1/PGLYRP3/PGLYRP4/SCGB2A1/TTR/UGT1A1/UGT1A3/  
 UGT1A7/UGT1A8/UGT1A9 41  
 GO:0022840 MF leak channel activity 5/1066 19/162080.006523428 0.054865466  
 0.045103815 KCNK2/KCNK3/KCNK4/NALCN/KCNK10 5  
 GO:0022842 MF narrow pore channel activity 5/1066 19/162080.006523428 0.054865466  
 0.045103815 KCNK2/KCNK3/KCNK4/NALCN/KCNK10 5  
 GO:0120015 MF intermembrane sterol transfer activity 5/1066 19/162080.006523428  
 0.054865466 0.045103815 APOE/APOA1/APOA2/APOA4/APOA5 5  
 GO:0004713 MF protein tyrosine kinase activity 17/1066 134/16208 0.00684852  
 0.056999658 0.046858292  
 ALK/AXL/BLK/CSF1R/DDR2/EFEMP1/EPHA3/EPHA5/EPHA6/EPHA7/FGFR1/FLT3/NRP2/NTRK  
 2/PDGFRB/ROR2/SLA 17  
 GO:0008395 MF steroid hydroxylase activity 7/1066 36/162080.008104793 0.065795622  
 0.05408928 CYP1B1/CYP7B1/CYP2B6/CYP2C19/CYP2J2/CYP3A4/CYP3A43 7  
 GO:0008179 MF adenylate cyclase binding 4/1066 13/162080.008234402 0.065795622  
 0.05408928 ADCY2/ADCY5/ADCYAP1R1/AKAP12 4  
 GO:0016725 MF oxidoreductase activity, acting on CH or CH2 groups 4/1066 13/16208  
 0.008234402 0.065795622 0.05408928 AOX1/CYP3A4/CYP3A43/XDH4  
 GO:0030506 MF ankyrin binding 5/1066 20/162080.008234746 0.065795622  
 0.05408928 FLNC/PTPRC/SLC8A1/RHBG/RHCG 5  
 GO:0015276 MF ligand-gated ion channel activity 17/1066 138/16208 0.00912789  
 0.071501803 0.058780219  
 ANXA6/CHRNA3/CHRNA6/CNGA3/GABRA5/GRIA1/GRIK3/GRIK5/HTR3A/JPH2/JPH4/KCNJ5/  
 P2RX2/CNGB3/GABRA4/P2RX3/ZACN 17  
 GO:0022834 MF ligand-gated channel activity 17/1066 138/16208 0.00912789  
 0.071501803 0.058780219  
 ANXA6/CHRNA3/CHRNA6/CNGA3/GABRA5/GRIA1/GRIK3/GRIK5/HTR3A/JPH2/JPH4/KCNJ5/  
 P2RX2/CNGB3/GABRA4/P2RX3/ZACN 17  
 GO:0005230 MF extracellular ligand-gated ion channel activity 11/1066 75/16208  
 0.009611386 0.074558225 0.061292843  
 CHRNA3/CHRNA6/GABRA5/GRIA1/GRIK3/GRIK5/HTR3A/P2RX2/GABRA4/P2RX3/ZACN 11  
 GO:0004896 MF cytokine receptor activity 13/1066 96/162080.009988794 0.076740832  
 0.063087121  
 CCR2/CCR4/CCR7/CCR8/CMKLR1/FLT3/GFRA1/GFRA2/GHR/IL10RA/IL12B/IL31RA/XCR1 13  
 GO:0051861 MF glycolipid binding 5/1066 21/162080.010233689 0.077873496  
 0.064018262 CD1C/CLIP3/MAG/SELP/THY15  
 GO:0001540 MF amyloid-beta binding 11/1066 77/162080.01164306 0.087762311  
 0.072147661  
 APOE/BCHE/C1QA/COL25A1/CRYAB/FCGR2B/GRIA1/ITGB2/NGFR/NLGN1/APOA1 11  
 GO:0008188 MF neuropeptide receptor activity 8/1066 48/162080.012261258  
 0.091558369 0.075268325 GRPR/NPY1R/NPY5R/SORCS1/SORCS2/SORCS3/TACR1/TACR2

GO:0070851 MF growth factor receptor binding 16/1066 132/16208 0.012971244  
0.095963184 0.078889436  
EFEMP1/FGF10/FGF2/FGF5/FGF7/FLRT2/GREM1/IL12B/IL21/MS4A1/PDGFRB/TLR9/FGF23/IL36G/IL36RN/IL37 16

GO:0015485 MF cholesterol binding 8/1066 49/162080.013833236 0.100527454  
0.082641632 ANXA6/APOE/PMP2/APOA1/APOA2/APOA4/APOA5/APOC3 8

GO:0042562 MF hormone binding 13/1066 100/16208 0.013839825 0.100527454  
0.082641632  
ADCYAP1R1/AR/ATP1A2/CCKAR/CHRNA3/CHRNA6/GHR/GLP2R/HCRT1R/MLNR/NPR3/VIPR2/TTR13

GO:0008392 MF arachidonic acid epoxigenase activity 4/1066 15/162080.014150209  
0.100552033 0.082661839 CYP2B6/CYP2C19/CYP2J2/CYP4F2 4

GO:0015271 MF outward rectifier potassium channel activity 4/1066 15/162080.014150209  
0.100552033 0.082661839 KCNA2/KCNA5/KCNK2/KCNMA1 4

GO:0015020 MF glucuronosyltransferase activity 6/1066 31/162080.014220751  
0.100552033 0.082661839 EXTL1/UGT1A1/UGT1A3/UGT1A7/UGT1A8/UGT1A9 6

GO:0004180 MF carboxypeptidase activity 7/1066 40/162080.014415983 0.101038334  
0.083061617 AEBP1/CPO/CPXM1/CPXM2/CPZ/CPA2/CPN1 7

GO:0016493 MF C-C chemokine receptor activity 5/1066 23/162080.015176444  
0.105443294 0.086682847 CCR2/CCR4/CCR7/CCR8/XCR1 5

GO:0005272 MF sodium channel activity 7/1066 41/162080.016425479 0.113137566  
0.093008157 GRIK3/GRIK5/NALCN/SCN11A/SCN2B/SCN7A/TRPM5 7

GO:0008236 MF serine-type peptidase activity 19/1066 171/16208 0.017323299  
0.115363844 0.094838335  
C1R/C1S/CMA1/CTSG/DPP6/ELANE/GZMK/HTRA3/MMP2/PCSK1/PRSS23/RELN/F2/KLK12/KLK15/MMP3/PCSK9/PRSS1/PRSS3 19

GO:0015459 MF potassium channel regulator activity 8/1066 51/162080.017409542  
0.115363844 0.094838335 ABCC9/DPP6/FLNA/KCNE4/KCNIP1/KCNMB1/LRRC38/KCNV1 8

GO:0005149 MF interleukin-1 receptor binding 4/1066 16/162080.017903775  
0.115363844 0.094838335 TLR9/IL36G/IL36RN/IL374

GO:0008391 MF arachidonic acid monooxygenase activity 4/1066 16/162080.017903775  
0.115363844 0.094838335 CYP2B6/CYP2C19/CYP2J2/CYP4F2 4

GO:0022841 MF potassium ion leak channel activity 4/1066 16/162080.017903775  
0.115363844 0.094838335 KCNK2/KCNK3/KCNK4/KCNK10 4

GO:0030280 MF structural constituent of epidermis 4/1066 16/162080.017903775  
0.115363844 0.094838335 FLG/KRT1/PI3/SPRR2E 4

GO:0047498 MF calcium-dependent phospholipase A2 activity 4/1066 16/16208  
0.017903775 0.115363844 0.094838335 PLA2G2D/PLA2G2F/PLA2G4E/PLA2G4F 4

GO:0055102 MF lipase inhibitor activity 4/1066 16/162080.017903775 0.115363844  
0.094838335 APOA1/APOA2/APOC3/SCGB1A1 4

GO:0005504 MF fatty acid binding 6/1066 33/162080.019138992 0.122336438  
0.100570368 FABP4/PMP2/PTGDS/FABP1/FABP2/UGT1A86

GO:0004252 MF serine-type endopeptidase activity 17/1066 150/16208 0.019738964

0.125170095 0.102899861  
 C1R/C1S/CMA1/CTSG/ELANE/GZMK/HTRA3/MMP2/PCSK1/PRSS23/F2/KLK12/KLK15/MMP3  
 /PCSK9/PRSS1/PRSS3 17  
 GO:0099094 MF ligand-gated cation channel activity 13/1066 105/16208 0.020145345  
 0.126741189 0.104191426  
 CHRNA3/CHRNA6/CNGA3/GRIA1/GRIK3/GRIK5/HTR3A/JPH2/JPH4/KCNJ5/P2RX2/CNGB3/P2  
 RX3 13  
 GO:0022843 MF voltage-gated cation channel activity 16/1066 139/16208 0.020375718  
 0.127189053 0.104559606  
 CACNA1G/CACNG7/CNR1/KCNA1/KCNA2/KCNA4/KCNA5/KCNB1/KCNE4/KCNJ5/KCNK2/KCN  
 K3/KCNMA1/KCNQ5/LRRC38/KCNV1 16  
 GO:0017171 MF serine hydrolase activity 19/1066 175/16208 0.021569603 0.133597772  
 0.109828088  
 C1R/C1S/CMA1/CTSG/DPP6/ELANE/GZMK/HTRA3/MMP2/PCSK1/PRSS23/RELN/F2/KLK12/K  
 LK15/MMP3/PCSK9/PRSS1/PRSS3 19  
 GO:0005005 MF transmembrane-ephrin receptor activity 4/1066 17/16208 0.022220548  
 0.135528383 0.111415204 EPHA3/EPHA5/EPHA6/EPHA7 4  
 GO:0016755 MF transferase activity, transferring amino-acyl groups 4/1066 17/16208  
 0.022220548 0.135528383 0.111415204 F13A1/GGT5/GGT6/TGM3 4  
 GO:0070405 MF ammonium ion binding 10/1066 74/16208 0.022567848 0.136603869  
 0.11229934  
 BCHE/CHRNA3/CHRNA6/HTR2A/HTR3A/PCYT1B/APOA2/APOA4/APOA5/HTR2C 10  
 GO:0004955 MF prostaglandin receptor activity 3/1066 10/16208 0.02400979  
 0.138013108 0.113457847 PTGDR/PTGER3/PTGFR 3  
 GO:0016175 MF superoxide-generating NADPH oxidase activity 3/1066 10/16208  
 0.02400979 0.138013108 0.113457847 CYBB/DUOX2/NOX1 3  
 GO:0031005 MF filamin binding 3/1066 10/16208 0.02400979 0.138013108  
 0.113457847 DPYSL3/DPYSL4/SYNPO2 3  
 GO:0035374 MF chondroitin sulfate binding 3/1066 10/16208 0.02400979 0.138013108  
 0.113457847 ANXA6/DPYSL3/PTPRS 3  
 GO:0043176 MF amine binding 3/1066 10/16208 0.02400979 0.138013108 0.113457847  
 HTR2A/HTR3A/HTR2C 3  
 GO:0045236 MF CXCR chemokine receptor binding 3/1066 10/16208 0.02400979  
 0.138013108 0.113457847 CXCL12/CXCL13/CXCL9 3  
 GO:0051378 MF serotonin binding 3/1066 10/16208 0.02400979 0.138013108  
 0.113457847 HTR2A/HTR3A/HTR2C 3  
 GO:0005246 MF calcium channel regulator activity 7/1066 45/16208 0.02644646  
 0.149993681 0.12330684 CACNG7/HPCAL4/NPY/NRXN2/PLN/PRKCB/AMBP 7  
 GO:0001786 MF phosphatidylserine binding 8/1066 55/16208 0.026469473 0.149993681  
 0.12330684 ANXA6/AXL/GAP43/JPH2/SYT11/SYT4/SYT6/THBS1 8  
 GO:0001227 MF DNA-binding transcription repressor activity, RNA polymerase II-specific  
 24/1066 241/16208 0.027848003 0.156694047 0.128815079  
 AEBP1/EMX2/EN1/FOXD3/FOXP2/HEY1/HIC1/IRX1/NKX3-2/PRRX1/PURG/TBX18/ZEB2/ASCL  
 2/CDX2/EMX1/FEZF1/HOXB13/MLXIPL/NKX6-2/NOTO/NR2E1/OVOL1/SALL1 24

GO:0032934 MF sterol binding 8/1066 56/162080.029166203 0.162473961 0.133566632  
ANXA6/APOE/PMP2/APOA1/APOA2/APOA4/APOA5/APOC3 8

GO:0004623 MF phospholipase A2 activity 5/1066 27/162080.029325072 0.162473961  
0.133566632 PLA2G2D/PLA2G12B/PLA2G2F/PLA2G4E/PLA2G4F 5

GO:0008307 MF structural constituent of muscle 7/1066 46/162080.029485262  
0.162473961 0.133566632 ACTN2/MYH11/MYL3/MYL9/PDLIM3/SYNNM/TPM2 7

GO:0004954 MF prostanoid receptor activity 3/1066 11/162080.031429279 0.170829891  
0.140435876 PTGDR/PTGER3/PTGFR 3

GO:0030546 MF receptor activator activity 3/1066 11/162080.031429279 0.170829891  
0.140435876 ANGPT4/GREM1/NRG3 3

GO:0017147 MF Wnt-protein binding 6/1066 37/162080.032193303 0.172157704  
0.141527445 AXL/FRZB/ROR2/SFRP1/SFRP2/SFRP4 6

GO:0005003 MF ephrin receptor activity 4/1066 19/162080.03261055 0.172157704  
0.141527445 EPHA3/EPHA5/EPHA6/EPHA7 4

GO:0102567 MF phospholipase A2 activity (consuming 1,2-dipalmitoylphosphatidylcholine)  
4/1066 19/162080.03261055 0.172157704 0.141527445  
PLA2G2D/PLA2G2F/PLA2G4E/PLA2G4F 4

GO:0102568 MF phospholipase A2 activity consuming 1,2-dioleoylphosphatidylethanolamine)  
4/1066 19/162080.03261055 0.172157704 0.141527445  
PLA2G2D/PLA2G2F/PLA2G4E/PLA2G4F 4

GO:1904315 MF transmitter-gated ion channel activity involved in regulation of postsynaptic  
membrane potential 7/1066 47/162080.032750902 0.172157704 0.141527445  
CHRNA3/CHRNA6/GABRA5/GRIA1/GRIK3/GRIK5/GABRA4 7

GO:0016209 MF antioxidant activity 10/1066 79/162080.033805375 0.17551845  
0.144290248 APOE/MPO/SOD3/TPO/TXNDC2/APOA4/DUOX2/FABP1/GSTA1/IYD 10

GO:0030507 MF spectrin binding 5/1066 28/162080.033829589 0.17551845  
0.144290248 ADD2/ANK2/PTPRC/PTPRN/USH1G 5

GO:0048306 MF calcium-dependent protein binding 8/1066 58/162080.035114537  
0.181009773 0.148804556 A2M/ANXA6/CASQ2/SELP/STMN2/SYT6/TNNT3/DMBT1 8

GO:0017046 MF peptide hormone binding 7/1066 48/162080.036249134 0.18566063  
0.152627934 ADCYAP1R1/CCKAR/GHR/GLP2R/HCTR1/NPR3/VIPR2 7

GO:0001614 MF purinergic nucleotide receptor activity 4/1066 20/162080.038704501  
0.193280599 0.15889216 P2RX2/P2RY10/P2RY12/P2RX3 4

GO:0008373 MF sialyltransferase activity 4/1066 20/162080.038704501 0.193280599  
0.15889216 ST6GAL2/ST6GALNAC5/ST8SIA2/ST8SIA6 4

GO:0016502 MF nucleotide receptor activity 4/1066 20/162080.038704501 0.193280599  
0.15889216 P2RX2/P2RY10/P2RY12/P2RX3 4

GO:0050750 MF low-density lipoprotein particle receptor binding 4/1066 20/16208  
0.038704501 0.193280599 0.15889216 APOE/DKK1/APOA5/PCSK9 4

GO:0032036 MF myosin heavy chain binding 3/1066 12/162080.039902399 0.196802571  
0.161787503 AXL/MYL3/MYL9 3

GO:0097001 MF ceramide binding 3/1066 12/162080.039902399 0.196802571  
0.161787503 CLIP3/MAG/GLTPD2 3

GO:0099529 MF neurotransmitter receptor activity involved in regulation of postsynaptic

membrane potential 7/1066 50/162080.043963394 0.214673007 0.176478435  
 CHRNA3/CHRNA6/GABRA5/GRIA1/GRIK3/GRIK5/GABRA4 7  
 GO:0008519 MF ammonium transmembrane transporter activity 5/1066 30/16208  
 0.044063045 0.214673007 0.176478435 SLC18A3/SLC6A2/RHBG/RHCG/SLC25A48 5  
 GO:0001848 MF complement binding 4/1066 21/162080.045403515 0.215068923  
 0.17680391 CR1/CR2/ITGB2/VSIG4 4  
 GO:0005540 MF hyaluronic acid binding 4/1066 21/162080.045403515 0.215068923  
 0.17680391 LAYN/SUSD5/VCAN/HAPLN1 4  
 GO:0046625 MF sphingolipid binding 4/1066 21/162080.045403515 0.215068923  
 0.17680391 CLIP3/MAG/SELP/GLTPD2 4  
 GO:0022824 MF transmitter-gated ion channel activity 8/1066 61/162080.045490173  
 0.215068923 0.17680391  
 CHRNA3/CHRNA6/GABRA5/GRIA1/GRIK3/GRIK5/HTR3A/GABRA4 8  
 GO:0022835 MF transmitter-gated channel activity 8/1066 61/162080.045490173  
 0.215068923 0.17680391  
 CHRNA3/CHRNA6/GABRA5/GRIA1/GRIK3/GRIK5/HTR3A/GABRA4 8  
 GO:0038024 MF cargo receptor activity 10/1066 84/162080.048463889 0.226448231  
 0.186158614 COLEC12/FOLR2/ITGB2/MRC1/PRG4/SSC5D/DMBT1/FOLR1/TFR2/TINAG 10  
 GO:0072341 MF modified amino acid binding 10/1066 84/162080.048463889 0.226448231  
 0.186158614 ANXA6/AXL/FOLR2/GAP43/JPH2/SYT11/SYT4/SYT6/THBS1/FOLR1 10  
 GO:0039706 MF co-receptor binding 3/1066 13/162080.049402798 0.228166678  
 0.187571316 DKK1/WNT9B/TFR2 3  
 GO:0061783 MF peptidoglycan muralytic activity 3/1066 13/162080.049402798  
 0.228166678 0.187571316 LYZL4/PGLYRP3/PGLYRP4 3  
 GO:0015248 MF sterol transporter activity 5/1066 31/162080.049801948 0.228177857  
 0.187580505 APOE/APOA1/APOA2/APOA4/APOA5 5  
 GO:0015026 MF coreceptor activity 6/1066 41/162080.049976377 0.228177857  
 0.187580505 CCR8/FCRL1/LILRA4/NGFR/RGMA/ROR2 6  
 GO:0043178 MF alcohol binding 10/1066 85/162080.051837059 0.233563561  
 0.192007987 ANXA6/APOE/PMP2/ADH7/APOA1/APOA2/APOA4/APOA5/APOC3/RBP2 10  
 GO:0098960 MF postsynaptic neurotransmitter receptor activity 7/1066 52/16208  
 0.052661801 0.233563561 0.192007987  
 CHRNA3/CHRNA6/GABRA5/GRIA1/GRIK3/GRIK5/GABRA4 7  
 GO:0005212 MF structural constituent of eye lens 4/1066 22/162080.05270627  
 0.233563561 0.192007987 CRYAB/HSPB6/VIM/CRYBA2 4  
 GO:0005520 MF insulin-like growth factor binding 4/1066 22/162080.05270627  
 0.233563561 0.192007987 HTRA3/IGFBP4/IGFBP5/IGFBPL1 4  
 GO:0050431 MF transforming growth factor beta binding 4/1066 22/162080.05270627  
 0.233563561 0.192007987 LRRC32/LTBP1/TGFB3/THBS1 4  
 GO:0033218 MF amide binding 30/1066 335/16208 0.052909893 0.233563561  
 0.192007987  
 ADCYAP1R1/APOE/BCHE/C1QA/CCKAR/CD1C/CLIP3/CMA1/COL25A1/CRYAB/FCGR2B/FOLR2  
 /GHR/GLP2R/GPR1/GRIA1/GRPR/HCRT1/HLA-DPA1/HLA-DPB1/HLA-DQA1/ITGB2/MAG/NGFR/N  
 LGN1/NPR3/VIPR2/APOA1/FOLR1/GLTPD2 30

GO:0005506 MF iron ion binding 15/1066 146/16208 0.057054479 0.250475434  
0.205910903  
AOX1/CDO1/CYP1B1/CYP7B1/PTGIS/CYP2B6/CYP2C19/CYP2J2/CYP3A4/CYP3A43/CYP4F2/C  
YP4F8/LCN2/PAH/XDH 15

GO:0001162 MF RNA polymerase II intronic transcription regulatory region sequence-specific  
DNA binding 3/1066 14/162080.05989358 0.258675518 0.21265203  
EMX2/EMX1/NOTO3

GO:0008242 MF omega peptidase activity 3/1066 14/162080.05989358 0.258675518  
0.21265203 GGT5/UCHL1/GGT63

GO:0086008 MF voltage-gated potassium channel activity involved in cardiac muscle cell  
action potential repolarization 3/1066 14/162080.05989358 0.258675518 0.21265203  
KCNA5/KCNE4/KCNJ5 3

GO:0017134 MF fibroblast growth factor binding 4/1066 23/162080.060607286  
0.258958404 0.212884585 CXCL13/FGFR1/THBS1/FGFBP1 4

GO:0051371 MF muscle alpha-actinin binding 4/1066 23/162080.060607286 0.258958404  
0.212884585 LDB3/PALLD/PDLIM3/SYNPO2 4

GO:0015662 MF ATPase activity, coupled to transmembrane movement of ions,  
phosphorylative mechanism 5/1066 33/162080.062533882 0.265769 0.218483441  
ATP1A2/ATP1A4/ATP2B2/ATP2C2/ATP6V1C2 5

GO:0001228 MF DNA-binding transcription activator activity, RNA polymerase II-specific  
37/1066 436/16208 0.066622661 0.28164818 0.231537402  
AR/BARX1/CEBPE/EBF2/EGR2/GLI2/GLI3/HAND2/HEYL/MEOX2/MYOCN/NDN/RORB/SALL2/  
SIX2/SOX10/SPIB/TBX18/ZEB2/ATOH1/CDX1/CREB3L3/CRX/CTCF/DLX3/FOXH1/FOXN1/GRHL3/H  
OXC13/NEUROD1/NR1H2/NR2E1/OVOL1/RFX4/RFX6/SIX3/TLX1 37

GO:0001965 MF G-protein alpha-subunit binding 4/1066 24/162080.069097254  
0.290572135 0.238873608 HTR2A/RGS22/RGS4/ADGRV1 4

GO:0001846 MF opsonin binding 3/1066 15/162080.071329423 0.293710273  
0.24145341 CR1/ITGB2/VSIG4 3

GO:0004953 MF icosanoid receptor activity 3/1066 15/162080.071329423 0.293710273  
0.24145341 PTGDR/PTGER3/PTGFR 3

GO:0005523 MF tropomyosin binding 3/1066 15/162080.071329423 0.293710273  
0.24145341 CALD1/LMOD1/TNNT3 3

GO:0050664 MF oxidoreductase activity, acting on NAD(P)H, oxygen as acceptor 3/1066  
15/162080.071329423 0.293710273 0.24145341 CYBB/DUOX2/NOX1 3

GO:0042277 MF peptide binding 25/1066 279/16208 0.071681481 0.293710273  
0.24145341  
ADCYAP1R1/APOE/BCHE/C1QA/CCKAR/CD1C/CMA1/COL25A1/CRYAB/FCGR2B/GHR/GLP2R/  
GPR1/GRIA1/GRPR/HCRTR1/HLA-DPA1/HLA-DPB1/HLA-DQA1/ITGB2/NGFR/NLGN1/NPR3/VIPR2/  
APOA1 25

GO:0030594 MF neurotransmitter receptor activity 12/1066 115/16208 0.075269432  
0.305388776 0.251054076  
CHRM2/CHRNA3/CHRNA6/GABRA5/GRIA1/GRIK3/GRIK5/HTR2A/HTR3A/HTR7/GABRA4/HT  
R2C 12

GO:0016705 MF oxidoreductase activity, acting on paired donors, with incorporation or

reduction of molecular oxygen 15/1066 152/16208 0.075296106 0.305388776  
0.251054076  
CYP1B1/CYP7B1/FMO1/FMO2/MOXD1/PTGIS/AKR1C4/CYP2B6/CYP2C19/CYP2J2/CYP3A4/C  
YP3A43/CYP4F2/CYP4F8/PAH15  
GO:0030551 MF cyclic nucleotide binding 5/1066 35/16208 0.076928478 0.310433607  
0.255201331 BVES/CNGA3/POPDC2/CNBD2/CNGB3 5  
GO:0035586 MF purinergic receptor activity 4/1066 25/16208 0.078163371 0.313831827  
0.257994941 P2RX2/P2RY10/P2RY12/P2RX3 4  
GO:0004869 MF cysteine-type endopeptidase inhibitor activity 7/1066 57/16208  
0.078840493 0.31496777 0.258928777  
CST2/CST5/SPOCK1/CARD18/CSTL1/HRG/SERPINB13 7  
GO:0003779 MF actin binding 35/1066 417/16208 0.081907507 0.325592529  
0.267663182  
ACTN2/ADD2/ANTXR1/ANXA6/CALD1/CNN1/CTNNA3/FERMT2/FLNA/FLNC/FMN2/GAS7/KC  
NMA1/KLHL4/LDB3/LMOD1/MAP1A/MYH11/MYL3/MYLK/MYOZ2/PALLD/PDLIM3/SLC6A2/SNTG  
2/SORBS1/SYNE1/SYNPO2/TAGLN/TNNT3/TNS1/TPM2/WIPF1/MYH4/MYO1A 35  
GO:0030169 MF low-density lipoprotein particle binding 3/1066 16/16208 0.083658419  
0.330906321 0.272031545 COLEC12/THBS1/PCSK9 3  
GO:0097110 MF scaffold protein binding 7/1066 58/16208 0.084842095 0.333935142  
0.274521479 ADCY5/CACNA1G/KCNA5/NLGN1/SHANK1/VIM/KRT15 7  
GO:0031210 MF phosphatidylcholine binding 4/1066 26/16208 0.087789688 0.342165662  
0.281287626 PCYT1B/APOA2/APOA4/APOA5 4  
GO:0050997 MF quaternary ammonium group binding 4/1066 26/16208 0.087789688  
0.342165662 0.281287626 PCYT1B/APOA2/APOA4/APOA5 4  
GO:0008235 MF metalloexopeptidase activity 7/1066 59/16208 0.091097239 0.351626541  
0.289065229 AEBP1/CPO/CPXM1/CPXM2/CPZ/CPA2/CPN1 7  
GO:0098631 MF cell adhesion mediator activity 7/1066 59/16208 0.091097239  
0.351626541 0.289065229 DSCAML1/EMILIN1/ITGA11/LRRC4C/NFASC/NTNG1/PALLD 7  
GO:0051393 MF alpha-actinin binding 5/1066 37/16208 0.092949147 0.355999537  
0.292660182 KCNA5/LDB3/PALLD/PDLIM3/SYNPO2 5  
GO:0001618 MF virus receptor activity 8/1066 71/16208 0.093566837 0.355999537  
0.292660182 AXL/CLEC4G/CR1/CR2/HTR2A/MRC1/NCAM1/CLDN9 8  
GO:0104005 MF hijacked molecular function 8/1066 71/16208 0.093566837 0.355999537  
0.292660182 AXL/CLEC4G/CR1/CR2/HTR2A/MRC1/NCAM1/CLDN9 8  
GO:0001161 MF intronic transcription regulatory region sequence-specific DNA binding  
3/1066 17/16208 0.096823677 0.363202432 0.298581539 EMX2/EMX1/NOTO3  
GO:0030296 MF protein tyrosine kinase activator activity 3/1066 17/16208 0.096823677  
0.363202432 0.298581539 ANGPT4/GREM1/NRG3 3  
GO:0044213 MF intronic transcription regulatory region DNA binding 3/1066 17/16208  
0.096823677 0.363202432 0.298581539 EMX2/EMX1/NOTO3  
GO:0045499 MF chemorepellent activity 4/1066 27/16208 0.097957447 0.365738319  
0.300666242 EPHA7/FLRT2/NRG3/APOA1 4  
GO:0015370 MF solute:sodium symporter activity 8/1066 72/16208 0.099541788  
0.369925064 0.304108083

SLC12A3/SLC6A17/SLC6A2/SLC13A2/SLC17A4/SLC28A2/SLC34A3/SLC6A7 8

GO:0008237 MF metallopeptidase activity 16/1066 174/16208 0.109490575  
0.405013749 0.332953797  
ADAM21/ADAM33/ADAMTS1/ADAMTS2/ADAMTS8/AEBP1/CPO/CPXM1/CPXM2/CPZ/MMP2  
/CLCA4/CPA2/CPN1/MEP1A/MMP3 16

GO:0030547 MF receptor inhibitor activity 5/1066 39/162080.110533198 0.406986291  
0.334575385 AGTR2/DKK1/ADH7/IL36RN/PCSK9 5

GO:0042626 MF ATPase activity, coupled to transmembrane movement of substances 10/1066  
99/162080.115555473 0.421592798 0.346583105  
ABCA8/ABCA9/ABCB5/ABCC9/ATP1A2/ATP1A4/ATP2B2/ABCC2/ATP2C2/ATP6V1C2 10

GO:0043492 MF ATPase activity, coupled to movement of substances 10/1066 99/16208  
0.115555473 0.421592798 0.346583105  
ABCA8/ABCA9/ABCB5/ABCC9/ATP1A2/ATP1A4/ATP2B2/ABCC2/ATP2C2/ATP6V1C2 10

GO:0005319 MF lipid transporter activity 12/1066 125/16208 0.120260862 0.436765584  
0.359056352  
ABCA8/ABCA9/APOE/FABP4/AKR1C4/APOA1/APOA2/APOA4/APOA5/FABP1/GLTPD2/MTTP  
12

GO:0005200 MF structural constituent of cytoskeleton 10/1066 100/16208 0.121294649  
0.438526807 0.360504219  
ADD2/ANK2/DES/NEFL/SYNN/TUBA1A/VIM/KRT15/KRT20/KRT6B 10

GO:0004970 MF ionotropic glutamate receptor activity 3/1066 19/162080.125418612  
0.447363711 0.367768863 GRIA1/GRIK3/GRIK5 3

GO:0008483 MF transaminase activity 3/1066 19/162080.125418612 0.447363711  
0.367768863 GFPT2/AGXT/AGXT2 3

GO:0009975 MF cyclase activity 3/1066 19/162080.125418612 0.447363711  
0.367768863 ADCY2/ADCY5/GUCY2C 3

GO:0004016 MF adenylate cyclase activity 2/1066 10/162080.136961752 0.46766  
0.384454041 ADCY2/ADCY5 2

GO:0005388 MF calcium-transporting ATPase activity 2/1066 10/162080.136961752  
0.46766 0.384454041 ATP2B2/ATP2C2 2

GO:0008035 MF high-density lipoprotein particle binding 2/1066 10/162080.136961752  
0.46766 0.384454041 APOA1/APOA2 2

GO:0015378 MF sodium:chloride symporter activity 2/1066 10/162080.136961752  
0.46766 0.384454041 SLC12A3/SLC6A2 2

GO:0019203 MF carbohydrate phosphatase activity 2/1066 10/162080.136961752 0.46766  
0.384454041 FBP2/G6PC 2

GO:0019864 MF IgG binding 2/1066 10/162080.136961752 0.46766 0.384454041  
FCGR2B/FCGR3A 2

GO:0035197 MF siRNA binding 2/1066 10/162080.136961752 0.46766 0.384454041  
TLR7/TLR9 2

GO:0042301 MF phosphate ion binding 2/1066 10/162080.136961752 0.46766  
0.384454041 G6PC/OTC 2

GO:0046624 MF sphingolipid transporter activity 2/1066 10/162080.136961752 0.46766  
0.384454041 GLTPD2/MTTP 2

GO:0050308 MF sugar-phosphatase activity 2/1066 10/162080.136961752 0.46766  
0.384454041 FBP2/G6PC 2

GO:0005248 MF voltage-gated sodium channel activity 3/1066 20/162080.140721103  
0.476424411 0.39165909 SCN11A/SCN2B/SCN7A 3

GO:0016849 MF phosphorus-oxygen lyase activity 3/1066 20/162080.140721103  
0.476424411 0.39165909 ADCY2/ADCY5/GUCY2C 3

GO:0005231 MF excitatory extracellular ligand-gated ion channel activity 4/1066  
31/162080.143588197 0.48204609 0.396280561 CHRNA3/CHRNA6/P2RX2/P2RX3 4

GO:0048019 MF receptor antagonist activity 4/1066 31/162080.143588197 0.48204609  
0.396280561 AGTR2/DKK1/ADH7/IL36RN 4

GO:0042165 MF neurotransmitter binding 6/1066 55/162080.151277776 0.495626328  
0.407444607 BCHE/CHRNA3/CHRNA6/HTR2A/HTR3A/HTR2C 6

GO:0008238 MF exopeptidase activity 10/1066 105/16208 0.152263372 0.495626328  
0.407444607 AEBP1/CPO/CPXM1/CPXM2/CPZ/GGT5/UCHL1/CPA2/CPN1/GGT6 10

GO:0046332 MF SMAD binding 8/1066 80/162080.154655129 0.495626328 0.407444607  
COL1A2/COL3A1/FLNA/MYOC/D/RANBP3L/TGFB11/ZEB2/FOXH1 8

GO:0004993 MF G protein-coupled serotonin receptor activity 4/1066 32/16208  
0.156106668 0.495626328 0.407444607 CHRM2/HTR2A/HTR7/HTR2C 4

GO:0099589 MF serotonin receptor activity 4/1066 32/162080.156106668 0.495626328  
0.407444607 CHRM2/HTR2A/HTR7/HTR2C 4

GO:0016769 MF transferase activity, transferring nitrogenous groups 3/1066 21/16208  
0.156607367 0.495626328 0.407444607 GFPT2/AGXT/AGXT2 3

GO:0051428 MF peptide hormone receptor binding 3/1066 21/162080.156607367  
0.495626328 0.407444607 ADCYAP1/GNAO1/VIP 3

GO:0004865 MF protein serine/threonine phosphatase inhibitor activity 2/1066  
11/162080.160413413 0.495626328 0.407444607 PPP1R14C/PPP1R14D 2

GO:0005221 MF intracellular cyclic nucleotide activated cation channel activity 2/1066  
11/162080.160413413 0.495626328 0.407444607 CNGA3/CNGB3 2

GO:0005324 MF long-chain fatty acid transporter activity 2/1066 11/162080.160413413  
0.495626328 0.407444607 FABP4/FABP1 2

GO:0005391 MF sodium:potassium-exchanging ATPase activity 2/1066 11/16208  
0.160413413 0.495626328 0.407444607 ATP1A2/ATP1A4 2

GO:0005542 MF folic acid binding 2/1066 11/162080.160413413 0.495626328  
0.407444607 FOLR2/FOLR1 2

GO:0008503 MF benzodiazepine receptor activity 2/1066 11/162080.160413413  
0.495626328 0.407444607 GABRA5/GABRA4 2

GO:0008556 MF potassium-transporting ATPase activity 2/1066 11/162080.160413413  
0.495626328 0.407444607 ATP1A2/ATP1A4 2

GO:0015114 MF phosphate ion transmembrane transporter activity 2/1066 11/16208  
0.160413413 0.495626328 0.407444607 ADAMTS8/SLC34A32

GO:0015643 MF toxic substance binding 2/1066 11/162080.160413413 0.495626328  
0.407444607 DSG1/GUCY2C2

GO:0030955 MF potassium ion binding 2/1066 11/162080.160413413 0.495626328  
0.407444607 ATP1A2/KCNA4 2

GO:0043855 MF cyclic nucleotide-gated ion channel activity 2/1066 11/162080.160413413  
0.495626328 0.407444607 CNGA3/CNGB3 2

GO:0089720 MF caspase binding 2/1066 11/162080.160413413 0.495626328  
0.407444607 CARD18/MAGEA3 2

GO:1902282 MF voltage-gated potassium channel activity involved in ventricular cardiac  
muscle cell action potential repolarization 2/1066 11/162080.160413413 0.495626328  
0.407444607 KCNE4/KCNJ5 2

GO:0005507 MF copper ion binding 6/1066 56/162080.160659849 0.495626328  
0.407444607 AOC3/MOXD1/PRND/SOD3/APOA4/HEPHL1 6

GO:0005516 MF calmodulin binding 17/1066 199/16208 0.162208652 0.498479666  
0.40979028  
ADD2/AEBP1/ARPP21/ATP2B2/CALD1/CAMK2A/CNN1/GAP43/KCNQ5/MYH11/MYLK/NGFR/  
RGS4/SLC8A1/IQCF6/MYH4/MYO1A 17

GO:0015405 MF P-P-bond-hydrolysis-driven transmembrane transporter activity 10/1066  
107/16208 0.165668613 0.507161768 0.416927664  
ABCA8/ABCA9/ABCB5/ABCC9/ATP1A2/ATP1A4/ATP2B2/ABCC2/ATP2C2/ATP6V1C2 10

GO:0005217 MF intracellular ligand-gated ion channel activity 4/1066 33/16208  
0.169013259 0.515425932 0.42372147 CNGA3/JPH2/JPH4/CNGB3 4

GO:0035254 MF glutamate receptor binding 5/1066 45/162080.171719198 0.519688835  
0.427225918 CAMK2A/IGSF11/NETO1/SHANK1/SYNDIG1 5

GO:0015399 MF primary active transmembrane transporter activity 10/1066 108/16208  
0.172578256 0.519688835 0.427225918  
ABCA8/ABCA9/ABCB5/ABCC9/ATP1A2/ATP1A4/ATP2B2/ABCC2/ATP2C2/ATP6V1C2 10

GO:0005537 MF mannose binding 3/1066 22/162080.173012804 0.519688835  
0.427225918 CLEC17A/CLEC6A/MRC1 3

GO:0042605 MF peptide antigen binding 3/1066 22/162080.173012804 0.519688835  
0.427225918 HLA-DPA1/HLA-DPB1/HLA-DQA1 3

GO:0001530 MF lipopolysaccharide binding 4/1066 34/162080.182278362 0.542014622  
0.445579506 BPI/SELP/BPIFA2/F2 4

GO:0042805 MF actinin binding 5/1066 46/162080.182992632 0.542014622  
0.445579506 KCNA5/LDB3/PALLD/PDLIM3/SYNPO2 5

GO:0004032 MF alditol:NADP+ 1-oxidoreductase activity 2/1066 12/162080.184515616  
0.542014622 0.445579506 AKR1B10/AKR1C4 2

GO:0017154 MF semaphorin receptor activity 2/1066 12/162080.184515616 0.542014622  
0.445579506 NRP2/PLXNA4 2

GO:0031994 MF insulin-like growth factor I binding 2/1066 12/162080.184515616  
0.542014622 0.445579506 IGFBP4/IGFBP5 2

GO:0045295 MF gamma-catenin binding 2/1066 12/162080.184515616 0.542014622  
0.445579506 CDH2/DSG1 2

GO:0015464 MF acetylcholine receptor activity 3/1066 23/162080.189873631  
0.551669205 0.453516348 CHRM2/CHRNA3/CHRNA6 3

GO:0030552 MF cAMP binding 3/1066 23/162080.189873631 0.551669205 0.453516348  
BVES/POPDC2/CNBD2 3

GO:0070412 MF R-SMAD binding 3/1066 23/162080.189873631 0.551669205

0.453516348 MYOCD/ZEB2/FOXH1 3  
 GO:0008200 MF ion channel inhibitor activity 4/1066 35/162080.195871896 0.564987887  
 0.464465373 AMBP/KCNV1/PCSK9/PDZD3 4  
 GO:0017080 MF sodium channel regulator activity 4/1066 35/162080.195871896  
 0.564987887 0.464465373 FXYD6/SCN2B/FXYD4/PCSK9 4  
 GO:0001871 MF pattern binding 3/1066 24/162080.2071274 0.573976209  
 0.471854495 CLEC4G/PRG4/TINAG 3  
 GO:0004364 MF glutathione transferase activity 3/1066 24/162080.2071274  
 0.573976209 0.471854495 GSTA1/GSTA2/GSTA3 3  
 GO:0030247 MF polysaccharide binding 3/1066 24/162080.2071274 0.573976209  
 0.471854495 CLEC4G/PRG4/TINAG 3  
 GO:0042923 MF neuropeptide binding 3/1066 24/162080.2071274 0.573976209  
 0.471854495 ADCYAP1R1/GPR1/GRPR3  
 GO:0001608 MF G protein-coupled nucleotide receptor activity 2/1066 13/16208  
 0.209081583 0.573976209 0.471854495 P2RY10/P2RY12 2  
 GO:0004065 MF arylsulfatase activity 2/1066 13/162080.209081583 0.573976209  
 0.471854495 ARSI/SULF1 2  
 GO:0008553 MF proton-exporting ATPase activity, phosphorylative mechanism 2/1066  
 13/162080.209081583 0.573976209 0.471854495 ATP2C2/ATP6V1C2 2  
 GO:0015373 MF anion:sodium symporter activity 2/1066 13/162080.209081583  
 0.573976209 0.471854495 SLC12A3/SLC6A2 2  
 GO:0022851 MF GABA-gated chloride ion channel activity 2/1066 13/162080.209081583  
 0.573976209 0.471854495 GABRA5/GABRA4 2  
 GO:0036041 MF long-chain fatty acid binding 2/1066 13/162080.209081583 0.573976209  
 0.471854495 FABP4/FABP2 2  
 GO:0042043 MF neurexin family protein binding 2/1066 13/162080.209081583  
 0.573976209 0.471854495 NLGN1/CEL 2  
 GO:0045028 MF G protein-coupled purinergic nucleotide receptor activity 2/1066  
 13/162080.209081583 0.573976209 0.471854495 P2RY10/P2RY12 2  
 GO:0070330 MF aromatase activity 2/1066 13/162080.209081583 0.573976209  
 0.471854495 CYP3A43/CYP4F8 2  
 GO:0016248 MF channel inhibitor activity 4/1066 36/162080.209763521 0.573976209  
 0.471854495 AMBP/KCNV1/PCSK9/PDZD3 4  
 GO:0019825 MF oxygen binding 4/1066 36/162080.209763521 0.573976209  
 0.471854495 CYP1B1/NGB/CYP2C19/CYP3A4 4  
 GO:0030170 MF pyridoxal phosphate binding 5/1066 49/162080.218320075 0.593325646  
 0.487761284 GADL1/PYGM/AGXT/AGXT2/DDC 5  
 GO:0070279 MF vitamin B6 binding 5/1066 49/162080.218320075 0.593325646  
 0.487761284 GADL1/PYGM/AGXT/AGXT2/DDC 5  
 GO:0008327 MF methyl-CpG binding 3/1066 25/162080.224713403 0.60863054  
 0.500343135 CDX1/CDX2/HOXB13 3  
 GO:0015294 MF solute:cation symporter activity 9/1066 102/16208 0.227644898  
 0.614487411 0.505157953  
 SLC12A3/SLC6A17/SLC6A2/SLC13A2/SLC17A4/SLC28A2/SLC34A3/SLC45A2/SLC6A7 9

GO:0005044 MF scavenger receptor activity 5/1066 50/162080.230537998 0.614878466  
0.505479432 COLEC12/PRG4/SSC5D/DMBT1/TINAG 5

GO:0005080 MF protein kinase C binding 5/1066 50/162080.230537998 0.614878466  
0.505479432 DACT1/DACT3/LDB3/PRKCB/UGT1A7 5

GO:0098632 MF cell-cell adhesion mediator activity 5/1066 50/162080.230537998  
0.614878466 0.505479432 DSCAML1/LRRC4C/NFASC/NTNG1/PALLD 5

GO:0004089 MF carbonate dehydratase activity 2/1066 14/162080.23394625  
0.614878466 0.505479432 CA1/CA4 2

GO:0008020 MF G protein-coupled photoreceptor activity 2/1066 14/162080.23394625  
0.614878466 0.505479432 GPR88/RGR 2

GO:0016863 MF intramolecular oxidoreductase activity, transposing C=C bonds 2/1066  
14/162080.23394625 0.614878466 0.505479432 GSTA1/HSD3B1 2

GO:0045125 MF bioactive lipid receptor activity 2/1066 14/162080.23394625  
0.614878466 0.505479432 GPR174/S1PR3 2

GO:0060229 MF lipase activator activity 2/1066 14/162080.23394625 0.614878466  
0.505479432 APOA5/APOH 2

GO:0016709 MF oxidoreductase activity, acting on paired donors, with incorporation or  
reduction of molecular oxygen, NAD(P)H as one donor, and incorporation of one atom of oxygen  
4/1066 38/162080.238319573 0.624319144 0.513240426  
FMO1/FMO2/AKR1C4/CYP4F2 4

GO:0005328 MF neurotransmitter:sodium symporter activity 3/1066 26/162080.242573018  
0.626174517 0.514765692 SLC6A17/SLC6A2/SLC6A7 3

GO:0035925 MF mRNA 3'-UTR AU-rich region binding 3/1066 26/162080.242573018  
0.626174517 0.514765692 CPEB1/RBM24/APOBEC1 3

GO:0004601 MF peroxidase activity 5/1066 51/162080.242946308 0.626174517  
0.514765692 MPO/TPO/DUOX2/GSTA1/IYD 5

GO:0005160 MF transforming growth factor beta receptor binding 5/1066 51/16208  
0.242946308 0.626174517 0.514765692 GDF10/GDF5/GDF6/TGFB3/BMP7 5

GO:0019829 MF cation-transporting ATPase activity 5/1066 51/162080.242946308  
0.626174517 0.514765692 ATP1A2/ATP1A4/ATP2B2/ATP2C2/ATP6V1C2 5

GO:0099528 MF G protein-coupled neurotransmitter receptor activity 4/1066 39/16208  
0.25292373 0.644586961 0.529902198 CHRM2/HTR2A/HTR7/HTR2C 4

GO:0003823 MF antigen binding 5/1066 52/162080.255526467 0.644586961  
0.529902198 CD1C/HLA-DPA1/HLA-DPB1/HLA-DQA1/LILRB4 5

GO:0005544 MF calcium-dependent phospholipid binding 5/1066 52/162080.255526467  
0.644586961 0.529902198 ANXA6/SYT4/SYT6/PLA2G4E/PLA2G4F 5

GO:0008146 MF sulfotransferase activity 5/1066 52/162080.255526467 0.644586961  
0.529902198 CHST8/DSEL/CHST5/SULT1C3/SULT2A1 5

GO:0022853 MF active ion transmembrane transporter activity 5/1066 52/16208  
0.255526467 0.644586961 0.529902198 ATP1A2/ATP1A4/ATP2B2/ATP2C2/ATP6V1C2 5

GO:0042625 MF ATPase coupled ion transmembrane transporter activity 5/1066  
52/162080.255526467 0.644586961 0.529902198  
ATP1A2/ATP1A4/ATP2B2/ATP2C2/ATP6V1C2 5

GO:0010314 MF phosphatidylinositol-5-phosphate binding 2/1066 15/162080.258964223

0.644586961 0.529902198 JPH2/PHLDA3 2  
 GO:0015269 MF calcium-activated potassium channel activity 2/1066 15/16208  
 0.258964223 0.644586961 0.529902198 KCNMA1/KCNMB1 2  
 GO:0019215 MF intermediate filament binding 2/1066 15/16208 0.258964223  
 0.644586961 0.529902198 SYNM/VIM 2  
 GO:0019841 MF retinol binding 2/1066 15/16208 0.258964223 0.644586961 0.529902198  
 ADH7/RBP2 2  
 GO:0030553 MF cGMP binding 2/1066 15/16208 0.258964223 0.644586961 0.529902198  
 CNGA3/CNGB3 2  
 GO:0008066 MF glutamate receptor activity 3/1066 27/16208 0.260649965 0.644765703  
 0.530049138 GRIA1/GRIK3/GRIK5 3  
 GO:0080025 MF phosphatidylinositol-3,5-bisphosphate binding 3/1066 27/16208  
 0.260649965 0.644765703 0.530049138 CLVS2/JPH2/PHLDA3 3  
 GO:0005227 MF calcium activated cation channel activity 3/1066 28/16208 0.27889051  
 0.665461348 0.547062619 KCNMA1/KCNMB1/TRPM5 3  
 GO:0017091 MF AU-rich element binding 3/1066 28/16208 0.27889051 0.665461348  
 0.547062619 CPEB1/RBM24/APOBEC1 3  
 GO:0044325 MF ion channel binding 10/1066 122/16208 0.281595524 0.665461348  
 0.547062619 ABCC9/ACTN2/ANK2/FHL1/FLNA/KCNB1/KCNE4/LRRC38/SLC8A1/STAC 10  
 GO:0051015 MF actin filament binding 15/1066 192/16208 0.281900984 0.665461348  
 0.547062619  
 ACTN2/ADD2/ANTXR1/ANXA6/CTNNA3/FERMT2/FLNA/GAS7/MYH11/SYNE1/TAGLN/TPM2/  
 WIPF1/MYH4/MYO1A 15  
 GO:0004864 MF protein phosphatase inhibitor activity 4/1066 41/16208 0.282636616  
 0.665461348 0.547062619 PPP1R14C/PPP1R14D/PPP1R1B/PPP1R27 4  
 GO:0008013 MF beta-catenin binding 7/1066 81/16208 0.283132301 0.665461348  
 0.547062619 AR/CDH2/CTNNA3/DACT1/DACT3/GLI3/SALL1 7  
 GO:0004551 MF nucleotide diphosphatase activity 2/1066 16/16208 0.284007909  
 0.665461348 0.547062619 NUDT10/NUDT11 2  
 GO:0005159 MF insulin-like growth factor receptor binding 2/1066 16/16208 0.284007909  
 0.665461348 0.547062619 IGF1/REN2  
 GO:0005237 MF inhibitory extracellular ligand-gated ion channel activity 2/1066  
 16/16208 0.284007909 0.665461348 0.547062619 GABRA5/GABRA4 2  
 GO:0008093 MF cytoskeletal adaptor activity 2/1066 16/16208 0.284007909 0.665461348  
 0.547062619 MAP1A/ACTL82  
 GO:0008484 MF sulfuric ester hydrolase activity 2/1066 16/16208 0.284007909  
 0.665461348 0.547062619 ARSI/SULF1 2  
 GO:0009881 MF photoreceptor activity 2/1066 16/16208 0.284007909 0.665461348  
 0.547062619 GPR88/RGR 2  
 GO:0015377 MF cation:chloride symporter activity 2/1066 16/16208 0.284007909  
 0.665461348 0.547062619 SLC12A3/SLC6A2 2  
 GO:0016641 MF oxidoreductase activity, acting on the CH-NH2 group of donors, oxygen as  
 acceptor 2/1066 16/16208 0.284007909 0.665461348 0.547062619 AOC3/VCAM1 2  
 GO:0022848 MF acetylcholine-gated cation-selective channel activity 2/1066 16/16208

0.284007909 0.665461348 0.547062619 CHRNA3/CHRNA6 2  
 GO:0023026 MF MHC class II protein complex binding 2/1066 16/162080.284007909  
 0.665461348 0.547062619 HLA-DOA/MS4A1 2  
 GO:0031420 MF alkali metal ion binding 2/1066 16/162080.284007909 0.665461348  
 0.547062619 ATP1A2/KCNA4 2  
 GO:0071837 MF HMG box domain binding 2/1066 16/162080.284007909 0.665461348  
 0.547062619 EGR2/PRRX1 2  
 GO:0004620 MF phospholipase activity 8/1066 95/162080.286709535 0.669827247  
 0.550651739 EDNRA/PLA2G2D/PLD4/ASPG/PLA2G12B/PLA2G2F/PLA2G4E/PLA2G4F 8  
 GO:0016684 MF oxidoreductase activity, acting on peroxide as acceptor 5/1066  
 55/162080.29411342 0.685121348 0.563224716 MPO/TPO/DUOX2/GSTA1/IYD 5  
 GO:0033764 MF steroid dehydrogenase activity, acting on the CH-OH group of donors, NAD or  
 NADP as acceptor 3/1066 29/162080.297243616 0.686409392 0.564283592  
 HSD11B1/AKR1C4/HSD3B1 3  
 GO:0042287 MF MHC protein binding 3/1066 29/162080.297243616 0.686409392  
 0.564283592 FCRL6/KIR3DL2/KLRC4-KLRK13  
 GO:0043236 MF laminin binding 3/1066 29/162080.297243616 0.686409392  
 0.564283592 SLIT2/SSC5D/THBS1 3  
 GO:0005543 MF phospholipid binding 30/1066 411/16208 0.302127909 0.695677809  
 0.571902974  
 ACTN2/ANXA6/APOE/AXL/CLVS2/FERMT2/GAP43/JPH2/PCYT1B/PHLDA3/PLA2G2D/PSD/SN  
 AP91/SYT11/SYT4/SYT6/THBS1/THY1/APOA1/APOA2/APOA4/APOA5/APOC3/APOH/FABP1/GLTP  
 D2/OTC/PLA2G2F/PLA2G4E/PLA2G4F 30  
 GO:0003707 MF steroid hormone receptor activity 5/1066 56/162080.307197103  
 0.70329652 0.578166166 AR/RORB/RXRG/NR1I2/NR2E1 5  
 GO:0008227 MF G protein-coupled amine receptor activity 5/1066 56/162080.307197103  
 0.70329652 0.578166166 ADRB3/CHRM2/HTR2A/HTR7/HTR2C 5  
 GO:0042166 MF acetylcholine binding 2/1066 17/162080.308965807 0.7053248  
 0.579833575 CHRNA3/CHRNA6 2  
 GO:0016903 MF oxidoreductase activity, acting on the aldehyde or oxo group of donors  
 4/1066 43/162080.312832363 0.712116974 0.585417287  
 AOX1/ADH7/AKR1B10/AKR1C4 4  
 GO:0035255 MF ionotropic glutamate receptor binding 3/1066 30/162080.315661047  
 0.714484918 0.587363927 IGSF11/NETO1/SHANK1 3  
 GO:0050699 MF WW domain binding 3/1066 30/162080.315661047 0.714484918  
 0.587363927 TCEAL2/TCEAL5/TCEAL6 3  
 GO:0030674 MF protein binding, bridging 13/1066 169/16208 0.319969244  
 0.722190469 0.593698508  
 ANK2/COL11A1/COL14A1/COL19A1/COL1A2/COL8A2/FLRT2/MAP1A/NEFL/SLA/SORBS1/SY  
 NPO2/ACTL8 13  
 GO:0004222 MF metalloendopeptidase activity 8/1066 99/162080.326092418  
 0.733937583 0.603355579  
 ADAM21/ADAM33/ADAMTS1/ADAMTS2/ADAMTS8/MMP2/MEP1A/MMP3 8  
 GO:0019212 MF phosphatase inhibitor activity 4/1066 44/162080.328042976

0.734191423 0.603564255 PPP1R14C/PPP1R14D/PPP1R1B/PPP1R27 4  
 GO:0050681 MF androgen receptor binding 4/1066 44/162080.328042976 0.734191423  
 0.603564255 FOXP2/PRKCB/TGFB1I1/FOXH1 4  
 GO:0016722 MF oxidoreductase activity, oxidizing metal ions 2/1066 18/162080.333740945  
 0.744857583 0.612332695 CYBRD1/HEPHL1 2  
 GO:0016860 MF intramolecular oxidoreductase activity 4/1066 45/162080.343294077  
 0.764044477 0.628105861 PTGDS/PTGIS/GSTA1/HSD3B14  
 GO:0004622 MF lysophospholipase activity 2/1066 19/162080.358249454 0.790721862  
 0.650036811 ASPG/PLA2G4F 2  
 GO:0004890 MF GABA-A receptor activity 2/1066 19/162080.358249454 0.790721862  
 0.650036811 GABRA5/GABRA4 2  
 GO:0015296 MF anion:cation symporter activity 2/1066 19/162080.358249454  
 0.790721862 0.650036811 SLC12A3/SLC6A2 2  
 GO:0004175 MF endopeptidase activity 29/1066 410/16208 0.368972109 0.811827694  
 0.667387499  
 ADAM21/ADAM33/ADAMTS1/ADAMTS2/ADAMTS8/C1R/C1S/CLC/CMA1/CTSG/ELANE/GZM  
 K/HTRA3/MMP2/PCSK1/PRSS23/SFRP1/UCHL1/CAPN13/F2/KLK12/KLK15/MEP1A/MMP3/PCSK9/  
 PRSS1/PRSS3/REN/TINAG 29  
 GO:0016831 MF carboxy-lyase activity 3/1066 33/162080.37085996 0.811827694  
 0.667387499 GADL1/DDC/PCK1 3  
 GO:0061980 MF regulatory RNA binding 3/1066 33/162080.37085996 0.811827694  
 0.667387499 TLR7/TLR9/TRIM71 3  
 GO:0004879 MF nuclear receptor activity 4/1066 47/162080.373819645 0.813847128  
 0.669047636 AR/RORB/RXRG/NR1I2 4  
 GO:0098531 MF transcription factor activity, direct ligand regulated sequence-specific DNA  
 binding 4/1066 47/162080.373819645 0.813847128 0.669047636 AR/RORB/RXRG/NR1I2  
 4  
 GO:0004745 MF retinol dehydrogenase activity 2/1066 20/162080.382419271  
 0.819176937 0.673429167 ADH1B/ADH7 2  
 GO:0008106 MF alcohol dehydrogenase (NADP+) activity 2/1066 20/162080.382419271  
 0.819176937 0.673429167 AKR1B10/AKR1C4 2  
 GO:0016411 MF acylglycerol O-acyltransferase activity 2/1066 20/162080.382419271  
 0.819176937 0.673429167 MOGAT2/MOGAT3 2  
 GO:0016638 MF oxidoreductase activity, acting on the CH-NH2 group of donors 2/1066  
 20/162080.382419271 0.819176937 0.673429167 AOC3/VCAM1 2  
 GO:0051537 MF 2 iron, 2 sulfur cluster binding 2/1066 20/162080.382419271  
 0.819176937 0.673429167 AOX1/XDH 2  
 GO:0099095 MF ligand-gated anion channel activity 2/1066 20/162080.382419271  
 0.819176937 0.673429167 GABRA5/GABRA4 2  
 GO:0016229 MF steroid dehydrogenase activity 3/1066 34/162080.389109792  
 0.831280011 0.683378864 HSD11B1/AKR1C4/HSD3B1 3  
 GO:0016298 MF lipase activity 9/1066 120/16208 0.391769051 0.834729257  
 0.686214421 EDNRA/PLA2G2D/PLD4/ASPG/CEL/PLA2G12B/PLA2G2F/PLA2G4E/PLA2G4F

GO:0015085 MF calcium ion transmembrane transporter activity 10/1066 135/16208  
0.395936707 0.841365503 0.691669948  
ANXA6/ATP2B2/CACNA1G/CACNG7/CNR1/GPM6A/JPH2/JPH4/SLC8A1/ATP2C210

GO:0022804 MF active transmembrane transporter activity 24/1066 342/16208  
0.400931691 0.84971995 0.698537973  
ABCA8/ABCA9/ABCB5/ABCC9/ATP1A2/ATP1A4/ATP2B2/SLC12A3/SLC6A17/SLC6A2/SLC8A1/  
ABCC2/ATP2C2/ATP6V1C2/CDH17/SLC10A5/SLC13A2/SLC17A4/SLC26A3/SLC28A2/SLC34A3/SLC4  
5A2/SLC6A7/SLC9A2 24

GO:0051018 MF protein kinase A binding 4/1066 49/162080.404223491 0.854430077  
0.702410076 AKAP12/DACT1/DACT3/AKAP4 4

GO:0015278 MF calcium-release channel activity 2/1066 21/162080.406188945  
0.856245921 0.703902846 JPH2/JPH4 2

GO:0016504 MF peptidase activator activity 3/1066 35/162080.407225845 0.856245921  
0.703902846 FBLN1/FN1/SFRP2 3

GO:0052689 MF carboxylic ester hydrolase activity 9/1066 122/16208 0.410832632  
0.861562396 0.708273414  
BCHE/PLA2G2D/ASPG/CA1/CEL/PLA2G12B/PLA2G2F/PLA2G4E/PLA2G4F 9

GO:0042826 MF histone deacetylase binding 8/1066 108/16208 0.417146899  
0.872514064 0.717276564 DACT1/GLI3/HIC1/MYOC/MAGEA2/MAGEA2B/NR2E1/SIX3  
8

GO:0005158 MF insulin receptor binding 2/1066 22/162080.429506559 0.893686825  
0.734682273 IGF1/SORBS1 2

GO:0016917 MF GABA receptor activity 2/1066 22/162080.429506559 0.893686825  
0.734682273 GABRA5/GABRA4 2

GO:0005326 MF neurotransmitter transporter activity 4/1066 51/162080.434337664  
0.901391671 0.741016274 SLC18A3/SLC6A17/SLC6A2/SLC6A7 4

GO:0001102 MF RNA polymerase II activating transcription factor binding 4/1066  
52/162080.449238597 0.929900619 0.764452916 BEX1/EGR2/TBX18/NEUROD1 4

GO:0005547 MF phosphatidylinositol-3,4,5-trisphosphate binding 3/1066 38/16208  
0.46047312 0.950692566 0.781545565 FERMT2/JPH2/PHLDA3 3

GO:0015293 MF symporter activity 10/1066 143/16208 0.467793346 0.957932994  
0.787497778  
SLC12A3/SLC6A17/SLC6A2/SLC10A5/SLC13A2/SLC17A4/SLC28A2/SLC34A3/SLC45A2/SLC6A7  
10

GO:0005310 MF dicarboxylic acid transmembrane transporter activity 3/1066 39/16208  
0.477768903 0.957932994 0.787497778 ABCC2/SLC13A2/SLC26A3 3

GO:0030276 MF clathrin binding 4/1066 54/162080.478643083 0.957932994  
0.787497778 SNAP91/SYT11/SYT4/SYT6 4

GO:0016782 MF transferase activity, transferring sulfur-containing groups 5/1066  
69/162080.478763882 0.957932994 0.787497778  
CHST8/DSEL/CHST5/SULT1C3/SULT2A1 5

GO:0019842 MF vitamin binding 9/1066 130/16208 0.486607604 0.957932994  
0.787497778 FOLR2/GADL1/PYGM/ADH7/AGXT/AGXT2/DDC/FOLR1/RBP2 9

GO:0051087 MF chaperone binding 7/1066 100/16208 0.488886367 0.957932994

0.787497778 ATP1A2/DNAJB5/FN1/HSPB6/FGB/TERT/TSACC 7  
 GO:0030165 MF PDZ domain binding 6/1066 85/162080.490166695 0.957932994  
 0.787497778 ATP2B2/GRIA1/GRIK5/NLGN1/SNTG2/MUC17 6  
 GO:0017022 MF myosin binding 5/1066 70/162080.491568981 0.957932994  
 0.787497778 AXL/CALD1/MYL3/MYL9/MYOC 5  
 GO:0016597 MF amino acid binding 4/1066 55/162080.493115998 0.957932994  
 0.787497778 DPYS/AGXT/DDC/OTC 4  
 GO:0002162 MF dystroglycan binding 1/1066 10/162080.493647199 0.957932994  
 0.787497778 AGR3 1  
 GO:0005072 MF transforming growth factor beta receptor, cytoplasmic mediator activity  
 1/1066 10/162080.493647199 0.957932994 0.787497778 SMAD9 1  
 GO:0005351 MF carbohydrate:proton symporter activity 1/1066 10/162080.493647199  
 0.957932994 0.787497778 SLC45A2 1  
 GO:0008190 MF eukaryotic initiation factor 4E binding 1/1066 10/162080.493647199  
 0.957932994 0.787497778 C8orf88 1  
 GO:0010857 MF calcium-dependent protein kinase activity 1/1066 10/162080.493647199  
 0.957932994 0.787497778 CAMK2A 1  
 GO:0015651 MF quaternary ammonium group transmembrane transporter activity 1/1066  
 10/162080.493647199 0.957932994 0.787497778 SLC25A48 1  
 GO:0019531 MF oxalate transmembrane transporter activity 1/1066 10/162080.493647199  
 0.957932994 0.787497778 SLC26A3 1  
 GO:0019855 MF calcium channel inhibitor activity 1/1066 10/162080.493647199  
 0.957932994 0.787497778 AMBP 1  
 GO:0019911 MF structural constituent of myelin sheath 1/1066 10/162080.493647199  
 0.957932994 0.787497778 PLP11  
 GO:0043522 MF leucine zipper domain binding 1/1066 10/162080.493647199  
 0.957932994 0.787497778 CRX 1  
 GO:0045294 MF alpha-catenin binding 1/1066 10/162080.493647199 0.957932994  
 0.787497778 CDH2 1  
 GO:0070513 MF death domain binding 1/1066 10/162080.493647199 0.957932994  
 0.787497778 DAPL1 1  
 GO:0071723 MF lipopeptide binding 1/1066 10/162080.493647199 0.957932994  
 0.787497778 CD1C 1  
 GO:0099186 MF structural constituent of postsynapse 1/1066 10/162080.493647199  
 0.957932994 0.787497778 NEFL 1  
 GO:0004033 MF aldo-keto reductase (NADP) activity 2/1066 25/162080.496350763  
 0.957932994 0.787497778 AKR1B10/AKR1C4 2  
 GO:0015101 MF organic cation transmembrane transporter activity 2/1066 25/16208  
 0.496350763 0.957932994 0.787497778 SLC18A3/SLC25A48 2  
 GO:0023023 MF MHC protein complex binding 2/1066 25/162080.496350763  
 0.957932994 0.787497778 HLA-DOA/MS4A1 2  
 GO:0030371 MF translation repressor activity 2/1066 25/162080.496350763 0.957932994  
 0.787497778 CPEB1/TRIM71 2  
 GO:0015491 MF cation:cation antiporter activity 2/1066 26/162080.517498908

0.976912973 0.803100843 SLC8A1/SLC9A2 2  
 GO:0004859 MF phospholipase inhibitor activity 1/1066 11/162080.526970577  
 0.976912973 0.803100843 SCGB1A1 1  
 GO:0005035 MF death receptor activity 1/1066 11/162080.526970577 0.976912973  
 0.803100843 NGFR 1  
 GO:0005225 MF volume-sensitive anion channel activity 1/1066 11/162080.526970577  
 0.976912973 0.803100843 LRRC18 1  
 GO:0005522 MF profilin binding 1/1066 11/162080.526970577 0.976912973  
 0.803100843 WIPF1 1  
 GO:0015368 MF calcium:cation antiporter activity 1/1066 11/162080.526970577  
 0.976912973 0.803100843 SLC8A1 1  
 GO:0015386 MF potassium:proton antiporter activity 1/1066 11/162080.526970577  
 0.976912973 0.803100843 SLC9A2 1  
 GO:0016668 MF oxidoreductase activity, acting on a sulfur group of donors, NAD(P) as acceptor 1/1066 11/162080.526970577 0.976912973 0.803100843 TXNDC2 1  
 GO:0016813 MF hydrolase activity, acting on carbon-nitrogen (but not peptide) bonds, in linear amidines 1/1066 11/162080.526970577 0.976912973 0.803100843 PADI3 1  
 GO:0016868 MF intramolecular transferase activity, phosphotransferases 1/1066  
 11/162080.526970577 0.976912973 0.803100843 PGM5 1  
 GO:0017166 MF vinculin binding 1/1066 11/162080.526970577 0.976912973  
 0.803100843 SYNM 1  
 GO:0034713 MF type I transforming growth factor beta receptor binding 1/1066  
 11/162080.526970577 0.976912973 0.803100843 TGFB3 1  
 GO:0050786 MF RAGE receptor binding 1/1066 11/162080.526970577 0.976912973  
 0.803100843 S100A7 1  
 GO:0052650 MF NADP-retinol dehydrogenase activity 1/1066 11/162080.526970577  
 0.976912973 0.803100843 AKR1B10 1  
 GO:0070411 MF I-SMAD binding 1/1066 11/162080.526970577 0.976912973  
 0.803100843 TGFB11 1  
 GO:0070700 MF BMP receptor binding 1/1066 11/162080.526970577 0.976912973  
 0.803100843 BMP7 1  
 GO:1990825 MF sequence-specific mRNA binding 1/1066 11/162080.526970577  
 0.976912973 0.803100843 RBM24 1  
 GO:0045182 MF translation regulator activity 4/1066 58/162080.535456734 0.982211838  
 0.807456935 CPEB1/DAZL/IGF2BP1/TRIM71 4  
 GO:0016702 MF oxidoreductase activity, acting on single donors with incorporation of molecular oxygen, incorporation of two atoms of oxygen 2/1066 27/162080.538046824  
 0.982211838 0.807456935 CDO1/IDO2 2  
 GO:0046875 MF ephrin receptor binding 2/1066 27/162080.538046824 0.982211838  
 0.807456935 EPHA7/EFNA2 2  
 GO:0090079 MF translation regulator activity, nucleic acid binding 2/1066 27/16208  
 0.538046824 0.982211838 0.807456935 CPEB1/DAZL 2  
 GO:0099604 MF ligand-gated calcium channel activity 2/1066 27/162080.538046824  
 0.982211838 0.807456935 JPH2/JPH4 2

GO:0016810 MF hydrolase activity, acting on carbon-nitrogen (but not peptide) bonds 8/1066  
 121/16208 0.546262459 0.982211838 0.807456935  
 DPYS/APOBEC1/ASPG/GDA/PADI3/PGLYRP3/PGLYRP4/VNN3 8  
 GO:0003730 MF mRNA 3'-UTR binding 6/1066 90/16208 0.546778693 0.982211838  
 0.807456935 CPEB1/DAZL/PABPC5/RBM24/APOBEC1/IGF2BP1 6  
 GO:0003725 MF double-stranded RNA binding 5/1066 75/16208 0.553656951 0.982211838  
 0.807456935 TLR7/TLR8/VIM/ZFR2/MYH4 5  
 GO:0048029 MF monosaccharide binding 5/1066 75/16208 0.553656951 0.982211838  
 0.807456935 CLEC17A/CLEC6A/COLEC12/MRC1/SELP 5  
 GO:0005343 MF organic acid:sodium symporter activity 2/1066 28/16208 0.557981925  
 0.982211838 0.807456935 SLC13A2/SLC6A7 2  
 GO:0016701 MF oxidoreductase activity, acting on single donors with incorporation of  
 molecular oxygen 2/1066 28/16208 0.557981925 0.982211838 0.807456935 CDO1/IDO2  
 2  
 GO:0019706 MF protein-cysteine S-palmitoyltransferase activity 2/1066 28/16208  
 0.557981925 0.982211838 0.807456935 ZDHHC11/ZDHHC11B 2  
 GO:0019707 MF protein-cysteine S-acyltransferase activity 2/1066 28/16208 0.557981925  
 0.982211838 0.807456935 ZDHHC11/ZDHHC11B 2  
 GO:0004115 MF 3',5'-cyclic-AMP phosphodiesterase activity 1/1066 12/16208 0.558102847  
 0.982211838 0.807456935 PDE3A 1  
 GO:0004126 MF cytidine deaminase activity 1/1066 12/16208 0.558102847 0.982211838  
 0.807456935 APOBEC1 1  
 GO:0005172 MF vascular endothelial growth factor receptor binding 1/1066 12/16208  
 0.558102847 0.982211838 0.807456935 GREM1 1  
 GO:0005451 MF monovalent cation:proton antiporter activity 1/1066 12/16208  
 0.558102847 0.982211838 0.807456935 SLC9A2 1  
 GO:0015385 MF sodium:proton antiporter activity 1/1066 12/16208 0.558102847  
 0.982211838 0.807456935 SLC9A2 1  
 GO:0015926 MF glucosidase activity 1/1066 12/16208 0.558102847 0.982211838  
 0.807456935 SI 1  
 GO:0016857 MF racemase and epimerase activity, acting on carbohydrates and derivatives  
 1/1066 12/16208 0.558102847 0.982211838 0.807456935 DSEL1  
 GO:0017110 MF nucleoside-diphosphatase activity 1/1066 12/16208 0.558102847  
 0.982211838 0.807456935 ENTPD8 1  
 GO:0042975 MF peroxisome proliferator activated receptor binding 1/1066 12/16208  
 0.558102847 0.982211838 0.807456935 ASXL3 1  
 GO:0070410 MF co-SMAD binding 1/1066 12/16208 0.558102847 0.982211838  
 0.807456935 FOXH1 1  
 GO:0008374 MF O-acyltransferase activity 3/1066 44/16208 0.559951523 0.983299488  
 0.808351071 CHAT/MOGAT2/MOGAT3 3  
 GO:0048037 MF cofactor binding 31/1066 481/16208 0.574347852 0.989421407  
 0.81338378  
 AOC3/AOX1/CYBB/CYP1B1/CYP7B1/FMO1/FMO2/GADL1/IDO2/MPO/NGB/PTGIS/PYGM/TP  
 O/AGXT/AGXT2/AMBP/CYP2B6/CYP2C19/CYP2J2/CYP3A4/CYP3A43/CYP4F2/CYP4F8/DDC/DUOX2

/HRG/IYD/LCN2/NOX1/XDH 31

GO:0035035 MF histone acetyltransferase binding 2/1066 29/162080.577295874  
0.989421407 0.81338378 GLI3/MYOC2 2

GO:0036442 MF proton-exporting ATPase activity 2/1066 29/162080.577295874  
0.989421407 0.81338378 ATP2C2/ATP6V1C2 2

GO:0008253 MF 5'-nucleotidase activity 1/1066 13/162080.587187952 0.989421407  
0.81338378 NT5C1A 1

GO:0008271 MF secondary active sulfate transmembrane transporter activity 1/1066  
13/162080.587187952 0.989421407 0.81338378 SLC26A3 1

GO:0008417 MF fucosyltransferase activity 1/1066 13/162080.587187952 0.989421407  
0.81338378 FUT3 1

GO:0008494 MF translation activator activity 1/1066 13/162080.587187952 0.989421407  
0.81338378 DAZL 1

GO:0031404 MF chloride ion binding 1/1066 13/162080.587187952 0.989421407  
0.81338378 NPR3 1

GO:0042910 MF xenobiotic transmembrane transporter activity 1/1066 13/16208  
0.587187952 0.989421407 0.81338378 ABCC2 1

GO:0043495 MF protein membrane anchor 1/1066 13/162080.587187952 0.989421407  
0.81338378 SUN3 1

GO:0045159 MF myosin II binding 1/1066 13/162080.587187952 0.989421407  
0.81338378 MYL3 1

GO:0086080 MF protein binding involved in heterotypic cell-cell adhesion 1/1066  
13/162080.587187952 0.989421407 0.81338378 NFASC 1

GO:0030295 MF protein kinase activator activity 5/1066 78/162080.589064704  
0.989421407 0.81338378 ANGPT4/GREM1/NRG3/TCL1A/EPO 5

GO:0050660 MF flavin adenine dinucleotide binding 5/1066 78/162080.589064704  
0.989421407 0.81338378 AOX1/CYBB/FMO1/FMO2/XDH 5

GO:0005245 MF voltage-gated calcium channel activity 3/1066 46/162080.590557253  
0.989421407 0.81338378 CACNA1G/CACNG7/CNR1 3

GO:0019239 MF deaminase activity 2/1066 30/162080.595984076 0.989421407  
0.81338378 APOBEC1/GDA 2

GO:0043548 MF phosphatidylinositol 3-kinase binding 2/1066 30/162080.595984076  
0.989421407 0.81338378 AXL/PDGFRB 2

GO:0016757 MF transferase activity, transferring glycosyl groups 17/1066 268/16208  
0.597619867 0.989421407 0.81338378  
ART4/EXTL1/GXYLT2/HAS1/MGAT5B/PYGM/ST6GAL2/ST6GALNAC5/ST8SIA2/ST8SIA6/TMTC  
1/FUT3/UGT1A1/UGT1A3/UGT1A7/UGT1A8/UGT1A9 17

GO:0000980 MF RNA polymerase II distal enhancer sequence-specific DNA binding 6/1066  
95/162080.600408105 0.989421407 0.81338378 MEOX2/SOX10/SPIB/CDX1/CDX2/SIX3  
6

GO:0015103 MF inorganic anion transmembrane transporter activity 9/1066 143/16208  
0.603177319 0.989421407 0.81338378  
ADAMTS8/GABRA5/LRRC18/SLC12A3/SLC6A2/CLCA4/GABRA4/SLC26A3/SLC34A3 9

GO:0005548 MF phospholipid transporter activity 3/1066 47/162080.605334818

0.989421407 0.81338378 APOA1/GLTPD2/MTTP 3  
 GO:0008194 MF UDP-glycosyltransferase activity 9/1066 144/16208 0.611609076  
 0.989421407 0.81338378  
 EXTL1/GXYLT2/HAS1/MGAT5B/UGT1A1/UGT1A3/UGT1A7/UGT1A8/UGT1A9 9  
 GO:0015298 MF solute:cation antiporter activity 2/1066 31/162080.614045224  
 0.989421407 0.81338378 SLC8A1/SLC9A2 2  
 GO:0071949 MF FAD binding 2/1066 31/162080.614045224 0.989421407 0.81338378  
 AOX1/XDH 2  
 GO:0097718 MF disordered domain specific binding 2/1066 31/162080.614045224  
 0.989421407 0.81338378 FN1/KCNA1 2  
 GO:1904680 MF peptide transmembrane transporter activity 2/1066 31/162080.614045224  
 0.989421407 0.81338378 GPIHBP1/CDH17 2  
 GO:0000900 MF translation repressor activity, mRNA regulatory element binding 1/1066  
 14/162080.61436039 0.989421407 0.81338378 CPEB1 1  
 GO:0005095 MF GTPase inhibitor activity 1/1066 14/162080.61436039 0.989421407  
 0.81338378 SLIT2 1  
 GO:0005161 MF platelet-derived growth factor receptor binding 1/1066 14/16208  
 0.61436039 0.989421407 0.81338378 PDGFRB 1  
 GO:0005283 MF amino acid:sodium symporter activity 1/1066 14/162080.61436039  
 0.989421407 0.81338378 SLC6A7 1  
 GO:0005344 MF oxygen carrier activity 1/1066 14/162080.61436039 0.989421407  
 0.81338378 NGB 1  
 GO:0031432 MF titin binding 1/1066 14/162080.61436039 0.989421407 0.81338378  
 ACTN2 1  
 GO:0035497 MF cAMP response element binding 1/1066 14/162080.61436039  
 0.989421407 0.81338378 CREB3L3 1  
 GO:0044548 MF S100 protein binding 1/1066 14/162080.61436039 0.989421407  
 0.81338378 KCNK3 1  
 GO:0045504 MF dynein heavy chain binding 1/1066 14/162080.61436039 0.989421407  
 0.81338378 TRIM58 1  
 GO:0052742 MF phosphatidylinositol kinase activity 1/1066 14/162080.61436039  
 0.989421407 0.81338378 PI4K2B 1  
 GO:0097153 MF cysteine-type endopeptidase activity involved in apoptotic process 1/1066  
 14/162080.61436039 0.989421407 0.81338378 CLC 1  
 GO:1990381 MF ubiquitin-specific protease binding 1/1066 14/162080.61436039  
 0.989421407 0.81338378 PDZD3 1  
 GO:0016651 MF oxidoreductase activity, acting on NAD(P)H 6/1066 97/162080.620876298  
 0.989421407 0.81338378 CYBB/NDUFC2-KCTD14/TXNDC2/AKR1C4/DUOX2/NOX1 6  
 GO:0015108 MF chloride transmembrane transporter activity 6/1066 98/16208  
 0.630883255 0.989421407 0.81338378  
 GABRA5/SLC12A3/SLC6A2/CLCA4/GABRA4/SLC26A3 6  
 GO:0005154 MF epidermal growth factor receptor binding 2/1066 32/162080.631480888  
 0.989421407 0.81338378 EFEMP1/MS4A1 2  
 GO:0016417 MF S-acyltransferase activity 2/1066 32/162080.631480888 0.989421407

0.81338378 ZDHC11/ZDHC11B 2  
 GO:0031369 MF translation initiation factor binding 2/1066 32/162080.631480888  
 0.989421407 0.81338378 C8orf88/SYT11 2  
 GO:0016830 MF carbon-carbon lyase activity 3/1066 49/162080.633810293 0.989421407  
 0.81338378 GADL1/DDC/PCK1 3  
 GO:0001222 MF transcription corepressor binding 1/1066 15/162080.639745831  
 0.989421407 0.81338378 SIX3 1  
 GO:0005024 MF transforming growth factor beta-activated receptor activity 1/1066  
 15/162080.639745831 0.989421407 0.81338378 LTBP1 1  
 GO:0005545 MF 1-phosphatidylinositol binding 1/1066 15/162080.639745831  
 0.989421407 0.81338378 SNAP91 1  
 GO:0008252 MF nucleotidase activity 1/1066 15/162080.639745831 0.989421407  
 0.81338378 NT5C1A 1  
 GO:0008381 MF mechanosensitive ion channel activity 1/1066 15/162080.639745831  
 0.989421407 0.81338378 KCNK4 1  
 GO:0017160 MF Ral GTPase binding 1/1066 15/162080.639745831 0.989421407  
 0.81338378 FLNA 1  
 GO:0035173 MF histone kinase activity 1/1066 15/162080.639745831 0.989421407  
 0.81338378 PRKCB 1  
 GO:0043274 MF phospholipase binding 1/1066 15/162080.639745831 0.989421407  
 0.81338378 NEFL 1  
 GO:0048038 MF quinone binding 1/1066 15/162080.639745831 0.989421407  
 0.81338378 AOC3 1  
 GO:0050700 MF CARD domain binding 1/1066 15/162080.639745831 0.989421407  
 0.81338378 CARD18 1  
 GO:0016616 MF oxidoreductase activity, acting on the CH-OH group of donors, NAD or NADP  
 as acceptor 7/1066 116/16208 0.647473748 0.989421407 0.81338378  
 ADH1B/HSD11B1/ADH7/AKR1B10/AKR1C4/HSD3B1/LDHC 7  
 GO:0050661 MF NADP binding 3/1066 50/162080.647500743 0.989421407 0.81338378  
 FMO1/FMO2/NOX1 3  
 GO:0070888 MF E-box binding 3/1066 50/162080.647500743 0.989421407 0.81338378  
 HAND2/ASCL2/NEUROD1 3  
 GO:0016814 MF hydrolase activity, acting on carbon-nitrogen (but not peptide) bonds, in  
 cyclic amidines 2/1066 33/162080.648295142 0.989421407 0.81338378  
 APOBEC1/GDA 2  
 GO:0030374 MF nuclear receptor transcription coactivator activity 4/1066 67/16208  
 0.65053667 0.989421407 0.81338378 ACTN2/FGF2/PRKCB/NR1I2 4  
 GO:0019209 MF kinase activator activity 5/1066 84/162080.654968452 0.989421407  
 0.81338378 ANGPT4/GREM1/NRG3/TCL1A/EPO 5  
 GO:0033613 MF activating transcription factor binding 5/1066 84/162080.654968452  
 0.989421407 0.81338378 BEX1/EGR2/HAND2/TBX18/NEUROD1 5  
 GO:0051427 MF hormone receptor binding 11/1066 182/16208 0.657900173  
 0.989421407 0.81338378  
 ADCYAP1/FABP4/FLT3/FOXP2/GNAO1/NPPC/PRKCB/TGFB11/VIP/CRX/FOXH1 11

GO:0005546 MF phosphatidylinositol-4,5-bisphosphate binding 4/1066 68/16208  
 0.662079444 0.989421407 0.81338378 ACTN2/JPH2/PHLDA3/SNAP91 4  
 GO:0004675 MF transmembrane receptor protein serine/threonine kinase activity 1/1066  
 16/162080.663461692 0.989421407 0.81338378 LTBP1 1  
 GO:0004697 MF protein kinase C activity 1/1066 16/162080.663461692 0.989421407  
 0.81338378 PRKCB 1  
 GO:0005123 MF death receptor binding 1/1066 16/162080.663461692 0.989421407  
 0.81338378 NGF 1  
 GO:0005229 MF intracellular calcium activated chloride channel activity 1/1066  
 16/162080.663461692 0.989421407 0.81338378 CLCA4 1  
 GO:0005521 MF lamin binding 1/1066 16/162080.663461692 0.989421407 0.81338378  
 SYNE1 1  
 GO:0010181 MF FMN binding 1/1066 16/162080.663461692 0.989421407 0.81338378  
 IYD 1  
 GO:0015095 MF magnesium ion transmembrane transporter activity 1/1066 16/16208  
 0.663461692 0.989421407 0.81338378 NIPAL4 1  
 GO:0015116 MF sulfate transmembrane transporter activity 1/1066 16/162080.663461692  
 0.989421407 0.81338378 SLC26A3 1  
 GO:0016918 MF retinal binding 1/1066 16/162080.663461692 0.989421407 0.81338378  
 RBP2 1  
 GO:0022821 MF potassium ion antiporter activity 1/1066 16/162080.663461692  
 0.989421407 0.81338378 SLC9A2 1  
 GO:0030275 MF LRR domain binding 1/1066 16/162080.663461692 0.989421407  
 0.81338378 CRX 1  
 GO:0032794 MF GTPase activating protein binding 1/1066 16/162080.663461692  
 0.989421407 0.81338378 GNAO1 1  
 GO:0035259 MF glucocorticoid receptor binding 1/1066 16/162080.663461692  
 0.989421407 0.81338378 FLT3 1  
 GO:0050780 MF dopamine receptor binding 1/1066 16/162080.663461692 0.989421407  
 0.81338378 PPP1R1B 1  
 GO:0050811 MF GABA receptor binding 1/1066 16/162080.663461692 0.989421407  
 0.81338378 GABRA5 1  
 GO:0061778 MF intracellular chloride channel activity 1/1066 16/162080.663461692  
 0.989421407 0.81338378 CLCA4 1  
 GO:0098918 MF structural constituent of synapse 1/1066 16/162080.663461692  
 0.989421407 0.81338378 NEFL 1  
 GO:0036002 MF pre-mRNA binding 2/1066 34/162080.664494226 0.989421407  
 0.81338378 CELF2/RBM24 2  
 GO:0008022 MF protein C-terminus binding 11/1066 183/16208 0.664980345  
 0.989421407 0.81338378  
 CNGA3/FBLN1/FBLN5/FN1/HPICAL4/HSPB7/KCNK3/NEFL/SHANK1/PDZD3/TERT 11  
 GO:0005262 MF calcium channel activity 7/1066 119/16208 0.673787477 0.997829746  
 0.820296109 ANXA6/CACNA1G/CACNG7/CNR1/GPM6A/JPH2/JPH4 7  
 GO:0016620 MF oxidoreductase activity, acting on the aldehyde or oxo group of donors, NAD

or NADP as acceptor 2/1066 35/162080.680086249 0.997829746 0.820296109  
 AKR1B10/AKR1C4 2  
 GO:0042169 MF SH2 domain binding 2/1066 35/162080.680086249 0.997829746  
 0.820296109 FGFR1/SIGLEC10 2  
 GO:0015291 MF secondary active transmembrane transporter activity 14/1066 234/16208  
 0.68204036 0.997829746 0.820296109  
 SLC12A3/SLC6A17/SLC6A2/SLC8A1/CDH17/SLC10A5/SLC13A2/SLC17A4/SLC26A3/SLC28A2/  
 SLC34A3/SLC45A2/SLC6A7/SLC9A2 14  
 GO:0004198 MF calcium-dependent cysteine-type endopeptidase activity 1/1066  
 17/162080.685617685 0.997829746 0.820296109 CAPN13 1  
 GO:0004935 MF adrenergic receptor activity 1/1066 17/162080.685617685 0.997829746  
 0.820296109 ADRB3 1  
 GO:0005001 MF transmembrane receptor protein tyrosine phosphatase activity 1/1066  
 17/162080.685617685 0.997829746 0.820296109 PTPRC 1  
 GO:0015125 MF bile acid transmembrane transporter activity 1/1066 17/16208  
 0.685617685 0.997829746 0.820296109 AKR1C4 1  
 GO:0016854 MF racemase and epimerase activity 1/1066 17/162080.685617685  
 0.997829746 0.820296109 DSEL1  
 GO:0019198 MF transmembrane receptor protein phosphatase activity 1/1066 17/16208  
 0.685617685 0.997829746 0.820296109 PTPRC 1  
 GO:0034185 MF apolipoprotein binding 1/1066 17/162080.685617685 0.997829746  
 0.820296109 PCSK9 1  
 GO:0070064 MF proline-rich region binding 1/1066 17/162080.685617685 0.997829746  
 0.820296109 GHR 1  
 GO:0046915 MF transition metal ion transmembrane transporter activity 2/1066  
 36/162080.695080913 1 0.822080232 ATP2C2/SLC30A10 2  
 GO:0016765 MF transferase activity, transferring alkyl or aryl (other than methyl) groups  
 3/1066 54/162080.698582374 1 0.822080232 GSTA1/GSTA2/GSTA3 3  
 GO:0035258 MF steroid hormone receptor binding 5/1066 89/162080.704427206 1  
 0.822080232 FLT3/FOXP2/PRKCB/TGFB1I1/FOXH1 5  
 GO:0016811 MF hydrolase activity, acting on carbon-nitrogen (but not peptide) bonds, in  
 linear amides 4/1066 72/162080.70562052 1 0.822080232  
 ASPG/PGLYRP3/PGLYRP4/VNN3 4  
 GO:0019003 MF GDP binding 4/1066 72/162080.70562052 1 0.822080232  
 DIRAS1/MRAS/RAB31/PCK1 4  
 GO:0005416 MF amino acid:cation symporter activity 1/1066 18/162080.706316317 1  
 0.822080232 SLC6A7 1  
 GO:0031435 MF mitogen-activated protein kinase kinase kinase binding 1/1066  
 18/162080.706316317 1 0.822080232 ROR2 1  
 GO:0031690 MF adrenergic receptor binding 1/1066 18/162080.706316317 1  
 0.822080232 UCHL1 1  
 GO:0042288 MF MHC class I protein binding 1/1066 18/162080.706316317 1  
 0.822080232 KLRC4-KLRK1 1  
 GO:0070696 MF transmembrane receptor protein serine/threonine kinase binding 1/1066

18/162080.706316317 1 0.822080232 BMP7 1  
 GO:0032266 MF phosphatidylinositol-3-phosphate binding 2/1066 37/162080.709489269  
 1 0.822080232 JPH2/PHLDA3 2  
 GO:0043621 MF protein self-association 3/1066 55/162080.710436203 1 0.822080232  
 FLT3/AGXT/PCSK9 3  
 GO:0003727 MF single-stranded RNA binding 5/1066 90/162080.713700648 1  
 0.822080232 PABPC5/TLR7/TLR8/ZFR2/A1CF 5  
 GO:0016614 MF oxidoreductase activity, acting on CH-OH group of donors 7/1066  
 125/16208 0.722604204 1 0.822080232  
 ADH1B/HSD11B1/ADH7/AKR1B10/AKR1C4/HSD3B1/LDHC 7  
 GO:0019208 MF phosphatase regulator activity 5/1066 91/162080.722766577 1  
 0.822080232 ZEB2/PPP1R14C/PPP1R14D/PPP1R1B/PPP1R27 5  
 GO:0048487 MF beta-tubulin binding 2/1066 38/162080.723323499 1 0.822080232  
 SLC6A2/SYT11 2  
 GO:0005086 MF ARF guanyl-nucleotide exchange factor activity 1/1066 19/16208  
 0.725653365 1 0.822080232 PSD 1  
 GO:0005402 MF carbohydrate:cation symporter activity 1/1066 19/162080.725653365 1  
 0.822080232 SLC45A2 1  
 GO:0008320 MF protein transmembrane transporter activity 1/1066 19/162080.725653365  
 1 0.822080232 GPIHBP1 1  
 GO:0015106 MF bicarbonate transmembrane transporter activity 1/1066 19/16208  
 0.725653365 1 0.822080232 SLC26A3 1  
 GO:0015299 MF solute:proton antiporter activity 1/1066 19/162080.725653365 1  
 0.822080232 SLC9A2 1  
 GO:0031681 MF G-protein beta-subunit binding 1/1066 19/162080.725653365 1  
 0.822080232 GNMT1 1  
 GO:0031683 MF G-protein beta/gamma-subunit complex binding 1/1066 19/16208  
 0.725653365 1 0.822080232 GNAO1 1  
 GO:0070300 MF phosphatidic acid binding 1/1066 19/162080.725653365 1  
 0.822080232 JPH21  
 GO:0017124 MF SH3 domain binding 7/1066 126/16208 0.730234022 1  
 0.822080232 ARHGAP31/DPYSL3/GRIK5/PTTG2/QKI/SHANK1/WIPF1 7  
 GO:0060090 MF molecular adaptor activity 13/1066 226/16208 0.730995636 1  
 0.822080232  
 ANK2/COL11A1/COL14A1/COL19A1/COL1A2/COL8A2/FLRT2/MAP1A/NEFL/SLA/SORBS1/SY  
 NPO2/ACTL8 13  
 GO:0016409 MF palmitoyltransferase activity 2/1066 39/162080.736596721 1  
 0.822080232 ZDHHC11/ZDHHC11B 2  
 GO:0001091 MF RNA polymerase II basal transcription factor binding 1/1066 20/16208  
 0.743718317 1 0.822080232 AR 1  
 GO:0004602 MF glutathione peroxidase activity 1/1066 20/162080.743718317 1  
 0.822080232 GSTA1 1  
 GO:0004806 MF triglyceride lipase activity 1/1066 20/162080.743718317 1  
 0.822080232 CEL 1

GO:0005242 MF inward rectifier potassium channel activity 1/1066 20/162080.743718317  
1 0.822080232 KCNJ5 1

GO:1901338 MF catecholamine binding 1/1066 20/162080.743718317 1 0.822080232  
ADRB3 1

GO:0099516 MF ion antiporter activity 3/1066 58/162080.743839175 1 0.822080232  
SLC8A1/SLC26A3/SLC9A2 3

GO:0051117 MF ATPase binding 4/1066 76/162080.744942396 1 0.822080232  
ANK2/AR/PLN/FXYD4 4

GO:0035326 MF enhancer binding 7/1066 129/16208 0.752246814 1 0.822080232  
MEOX2/SOX10/SPIB/CDX1/CDX2/FOXH1/SIX3 7

GO:0019888 MF protein phosphatase regulator activity 4/1066 77/162080.754121035 1  
0.822080232 PPP1R14C/PPP1R14D/PPP1R1B/PPP1R27 4

GO:0030145 MF manganese ion binding 3/1066 59/162080.754267744 1 0.822080232  
ADCY2/MGAT5B/PCK1 3

GO:0008565 MF protein transporter activity 1/1066 21/162080.760594786 1  
0.822080232 GPIHBP1 1

GO:0019789 MF SUMO transferase activity 1/1066 21/162080.760594786 1  
0.822080232 EGR2 1

GO:0044769 MF ATPase activity, coupled to transmembrane movement of ions, rotational  
mechanism 1/1066 21/162080.760594786 1 0.822080232 ATP6V1C2 1

GO:0046961 MF proton-transporting ATPase activity, rotational mechanism 1/1066  
21/162080.760594786 1 0.822080232 ATP6V1C2 1

GO:0070034 MF telomerase RNA binding 1/1066 21/162080.760594786 1 0.822080232  
TERT1

GO:0016763 MF transferase activity, transferring pentosyl groups 2/1066 41/16208  
0.761516241 1 0.822080232 ART4/GXYLT2 2

GO:0019894 MF kinesin binding 2/1066 41/162080.761516241 1 0.822080232  
ATCAY/KCNA2 2

GO:0001158 MF enhancer sequence-specific DNA binding 6/1066 115/16208  
0.775717078 1 0.822080232 MEOX2/SOX10/SPIB/CDX1/CDX2/SIX3 6

GO:0000146 MF microfilament motor activity 1/1066 22/162080.776360892 1  
0.822080232 MYH4 1

GO:0003950 MF NAD+ ADP-ribosyltransferase activity 1/1066 22/162080.776360892 1  
0.822080232 ART4 1

GO:0017025 MF TBP-class protein binding 1/1066 22/162080.776360892 1  
0.822080232 CAND2 1

GO:0022884 MF macromolecule transmembrane transporter activity 1/1066 22/16208  
0.776360892 1 0.822080232 GPIHBP1 1

GO:0030159 MF receptor signaling complex scaffold activity 1/1066 22/162080.776360892  
1 0.822080232 SHANK1 1

GO:0030742 MF GTP-dependent protein binding 1/1066 22/162080.776360892 1  
0.822080232 MRAS 1

GO:0033038 MF bitter taste receptor activity 1/1066 22/162080.776360892 1  
0.822080232 TAS2R38 1

GO:0140103 MF catalytic activity, acting on a glycoprotein 1/1066 22/162080.776360892  
1 0.822080232 MGAT5B 1

GO:0001221 MF transcription cofactor binding 2/1066 43/162080.784365247 1  
0.822080232 SIX3/TERT 2

GO:1901505 MF carbohydrate derivative transmembrane transporter activity 2/1066  
43/162080.784365247 1 0.822080232 SLC17A4/SLC28A2 2

GO:0001223 MF transcription coactivator binding 1/1066 23/162080.791089626 1  
0.822080232 TERT1

GO:0004129 MF cytochrome-c oxidase activity 1/1066 23/162080.791089626 1  
0.822080232 COX7B2 1

GO:0008198 MF ferrous iron binding 1/1066 23/162080.791089626 1 0.822080232  
CDO1 1

GO:0015002 MF heme-copper terminal oxidase activity 1/1066 23/162080.791089626 1  
0.822080232 COX7B2 1

GO:0016676 MF oxidoreductase activity, acting on a heme group of donors, oxygen as  
acceptor 1/1066 23/162080.791089626 1 0.822080232 COX7B2 1

GO:0032813 MF tumor necrosis factor receptor superfamily binding 2/1066 44/16208  
0.795051615 1 0.822080232 NGF/TNFSF8 2

GO:1901618 MF organic hydroxy compound transmembrane transporter activity 2/1066  
44/162080.795051615 1 0.822080232 SLC6A2/AKR1C4 2

GO:0001085 MF RNA polymerase II transcription factor binding 8/1066 154/16208  
0.801600749 1 0.822080232 AR/BEX1/DACT1/EGR2/MYOC/TBX18/ZFPM2/NEUROD1  
8

GO:1902936 MF phosphatidylinositol bisphosphate binding 5/1066 101/16208  
0.802168185 1 0.822080232 ACTN2/CLVS2/JPH2/PHLDA3/SNAP91 5

GO:0016758 MF transferase activity, transferring hexosyl groups 11/1066 206/16208  
0.803158846 1 0.822080232  
EXTL1/HAS1/MGAT5B/PYGM/TMTC1/FUT3/UGT1A1/UGT1A3/UGT1A7/UGT1A8/UGT1A9  
11

GO:0003688 MF DNA replication origin binding 1/1066 24/162080.804849185 1  
0.822080232 MCMDC2 1

GO:0004190 MF aspartic-type endopeptidase activity 1/1066 24/162080.804849185 1  
0.822080232 REN 1

GO:0008143 MF poly(A) binding 1/1066 24/162080.804849185 1 0.822080232  
PABPC5 1

GO:0015295 MF solute:proton symporter activity 1/1066 24/162080.804849185 1  
0.822080232 SLC45A2 1

GO:0016675 MF oxidoreductase activity, acting on a heme group of donors 1/1066  
24/162080.804849185 1 0.822080232 COX7B2 1

GO:0033612 MF receptor serine/threonine kinase binding 1/1066 24/162080.804849185  
1 0.822080232 BMP7 1

GO:0042887 MF amide transmembrane transporter activity 2/1066 45/162080.805266711  
1 0.822080232 GPIHBP1/CDH17 2

GO:0048156 MF tau protein binding 2/1066 45/162080.805266711 1 0.822080232

APOE/MAP1A 2

GO:0030971 MF receptor tyrosine kinase binding 3/1066 65/162080.809812111 1  
0.822080232 ANGPT4/MYOC/NRG3 3

GO:0004715 MF non-membrane spanning protein tyrosine kinase activity 2/1066  
46/162080.815026232 1 0.822080232 BLK/SLA 2

GO:0016538 MF cyclin-dependent protein serine/threonine kinase regulator activity 2/1066  
46/162080.815026232 1 0.822080232 CCNA1/CNTD22

GO:0003785 MF actin monomer binding 1/1066 25/162080.817703286 1 0.822080232  
MYL3 1

GO:0048027 MF mRNA 5'-UTR binding 1/1066 25/162080.817703286 1 0.822080232  
IGF2BP1 1

GO:0070001 MF aspartic-type peptidase activity 1/1066 25/162080.817703286 1  
0.822080232 REN 1

GO:1990841 MF promoter-specific chromatin binding 2/1066 47/162080.82434585 1  
0.822080232 GLI2/SOX10 2

GO:0004435 MF phosphatidylinositol phospholipase C activity 1/1066 26/16208  
0.829711461 1 0.822080232 EDNRA 1

GO:0016866 MF intramolecular transferase activity 1/1066 26/162080.829711461 1  
0.822080232 PGM5 1

GO:0017075 MF syntaxin-1 binding 1/1066 26/162080.829711461 1 0.822080232  
SYT41

GO:0035198 MF miRNA binding 1/1066 26/162080.829711461 1 0.822080232  
TRIM71 1

GO:0043015 MF gamma-tubulin binding 1/1066 26/162080.829711461 1 0.822080232  
NDN1

GO:0070273 MF phosphatidylinositol-4-phosphate binding 1/1066 26/162080.829711461  
1 0.822080232 JPH21

GO:0005253 MF anion channel activity 4/1066 87/162080.832312045 1 0.822080232  
GABRA5/LRRC18/CLCA4/GABRA4 4

GO:0009055 MF electron transfer activity 5/1066 106/16208 0.834533251 1  
0.822080232 AOX1/CYBB/AKR1C4/COX7B2/XDH 5

GO:0000030 MF mannosyltransferase activity 1/1066 27/162080.840929331 1  
0.822080232 TMTC1 1

GO:0043325 MF phosphatidylinositol-3,4-bisphosphate binding 1/1066 27/16208  
0.840929331 1 0.822080232 PHLDA3 1

GO:0071889 MF 14-3-3 protein binding 1/1066 27/162080.840929331 1 0.822080232  
SYNPO2 1

GO:0000149 MF SNARE binding 5/1066 108/16208 0.846208653 1 0.822080232  
SNAP91/SYT11/SYT4/SYT6/TXLNB 5

GO:0015078 MF proton transmembrane transporter activity 5/1066 108/16208  
0.846208653 1 0.822080232 ATP2C2/ATP6V1C2/COX7B2/SLC45A2/SLC9A2 5

GO:0016836 MF hydro-lyase activity 2/1066 50/162080.849820353 1 0.822080232  
CA1/CA4 2

GO:0004114 MF 3',5'-cyclic-nucleotide phosphodiesterase activity 1/1066 28/16208

0.851408865 1 0.822080232 PDE3A 1  
 GO:0004629 MF phospholipase C activity 1/1066 28/162080.851408865 1 0.822080232  
 EDNR 1  
 GO:0004683 MF calmodulin-dependent protein kinase activity 1/1066 28/16208  
 0.851408865 1 0.822080232 CAMK2A 1  
 GO:0008527 MF taste receptor activity 1/1066 28/162080.851408865 1 0.822080232  
 TAS2R38 1  
 GO:0032947 MF protein-containing complex scaffold activity 1/1066 28/162080.851408865  
 1 0.822080232 SHANK1 1  
 GO:0043425 MF bHLH transcription factor binding 1/1066 28/162080.851408865 1  
 0.822080232 FOXH1 1  
 GO:0015238 MF drug transmembrane transporter activity 4/1066 91/162080.857203803  
 1 0.822080232 SLC18A3/SLC6A2/ABCC2/SLC6A7 4  
 GO:0004112 MF cyclic-nucleotide phosphodiesterase activity 1/1066 29/162080.861198615  
 1 0.822080232 PDE3A 1  
 GO:0043539 MF protein serine/threonine kinase activator activity 1/1066 29/16208  
 0.861198615 1 0.822080232 TCL1A 1  
 GO:0045505 MF dynein intermediate chain binding 1/1066 29/162080.861198615 1  
 0.822080232 TRIM58 1  
 GO:0005070 MF SH3/SH2 adaptor activity 2/1066 52/162080.864884789 1  
 0.822080232 SLA/SORBS1 2  
 GO:0005254 MF chloride channel activity 3/1066 73/162080.867041197 1 0.822080232  
 GABRA5/CLCA4/GABRA4 3  
 GO:0019887 MF protein kinase regulator activity 8/1066 168/16208 0.869902342 1  
 0.822080232 ANGPT4/CCNA1/GREM1/NRG3/TCL1A/CNTD2/EPO/PPP1R1B 8  
 GO:0005164 MF tumor necrosis factor receptor binding 1/1066 30/162080.870343944 1  
 0.822080232 TNFSF8 1  
 GO:0008266 MF poly(U) RNA binding 1/1066 30/162080.870343944 1 0.822080232  
 PABPC5 1  
 GO:0070717 MF poly-purine tract binding 1/1066 30/162080.870343944 1  
 0.822080232 PABPC5 1  
 GO:1901981 MF phosphatidylinositol phosphate binding 7/1066 150/16208  
 0.87094374 1 0.822080232 ACTN2/CLVS2/FERMT2/GAP43/JPH2/PHLDA3/SNAP917  
 GO:0008375 MF acetylglucosaminyltransferase activity 2/1066 53/162080.871885623 1  
 0.822080232 EXTL1/MGAT5B 2  
 GO:0016655 MF oxidoreductase activity, acting on NAD(P)H, quinone or similar compound as  
 acceptor 2/1066 53/162080.871885623 1 0.822080232 NDUFC2-KCTD14/AKR1C4 2  
 GO:0019905 MF syntaxin binding 3/1066 74/162080.873008872 1 0.822080232  
 SYT4/SYT6/TXLNB 3  
 GO:0008081 MF phosphoric diester hydrolase activity 4/1066 94/162080.873743723 1  
 0.822080232 EDNR/PDE3A/PLCXD3/PLD44  
 GO:0004197 MF cysteine-type endopeptidase activity 5/1066 114/16208 0.87720394  
 1 0.822080232 CLC/SFRP1/UCHL1/CAPN13/TINAG 5  
 GO:0016667 MF oxidoreductase activity, acting on a sulfur group of donors 2/1066

54/162080.878551133 1 0.822080232 MSRB3/TXNDC2 2  
 GO:0015175 MF neutral amino acid transmembrane transporter activity 1/1066  
 31/162080.878887234 1 0.822080232 SLC6A7 1  
 GO:0015301 MF anion:anion antiporter activity 1/1066 31/162080.878887234 1  
 0.822080232 SLC26A3 1  
 GO:0034061 MF DNA polymerase activity 1/1066 31/162080.878887234 1 0.822080232  
 TERT1  
 GO:0016853 MF isomerase activity 7/1066 152/16208 0.879288857 1 0.822080232  
 DSEL/PGM5/PTGDS/PTGIS/CYP2J2/GSTA1/HSD3B1 7  
 GO:0016829 MF lyase activity 8/1066 173/16208 0.889092669 1 0.822080232  
 ADCY2/ADCY5/GADL1/CA1/CA4/DDC/GUCY2C/PCK1 8  
 GO:0008187 MF poly-pyrimidine tract binding 1/1066 33/162080.894323489 1  
 0.822080232 PABPC5 1  
 GO:0043014 MF alpha-tubulin binding 1/1066 33/162080.894323489 1 0.822080232  
 SLC6A2 1  
 GO:0019903 MF protein phosphatase binding 6/1066 138/16208 0.897840288 1  
 0.822080232 CD22/CDH2/CSF1R/FCRL6/MYOZ2/REG1A 6  
 GO:0015144 MF carbohydrate transmembrane transporter activity 1/1066 35/16208  
 0.907793946 1 0.822080232 SLC45A2 1  
 GO:1901682 MF sulfur compound transmembrane transporter activity 1/1066 35/16208  
 0.907793946 1 0.822080232 SLC26A3 1  
 GO:0051536 MF iron-sulfur cluster binding 2/1066 60/162080.912247976 1  
 0.822080232 AOX1/XDH 2  
 GO:0051540 MF metal cluster binding 2/1066 60/162080.912247976 1 0.822080232  
 AOX1/XDH 2  
 GO:0042162 MF telomeric DNA binding 1/1066 36/162080.913871461 1 0.822080232  
 TERT1  
 GO:0015297 MF antiporter activity 3/1066 83/162080.916868124 1 0.822080232  
 SLC8A1/SLC26A3/SLC9A2 3  
 GO:0015036 MF disulfide oxidoreductase activity 1/1066 37/162080.919548744 1  
 0.822080232 TXNDC2 1  
 GO:0019902 MF phosphatase binding 8/1066 183/16208 0.920435827 1  
 0.822080232 CD22/CDH2/CSF1R/FCRL6/MYOZ2/SIGLEC10/PPP1R27/REG1A 8  
 GO:0060590 MF ATPase regulator activity 1/1066 38/162080.924852129 1 0.822080232  
 PLN 1  
 GO:0003713 MF transcription coactivator activity 15/1066 313/16208 0.924971693 1  
 0.822080232  
 ACTN2/FGF2/IL31RA/MYOC/PRKCB/PRRX1/SOX10/TGFB11/UTF1/WWTR1/ZFPM2/NEURO  
 D1/NR112/SIX3/VGLL1 15  
 GO:0061659 MF ubiquitin-like protein ligase activity 10/1066 224/16208 0.929221056  
 1 0.822080232  
 ASB2/EGR2/PDZD4/PDZRN4/RNF150/RNF165/TRIM58/RNF183/RNF186/TRIM71 10  
 GO:0003954 MF NADH dehydrogenase activity 1/1066 39/162080.929806219 1  
 0.822080232 NDUFC2-KCTD14 1

GO:0008137 MF NADH dehydrogenase (ubiquinone) activity 1/1066 39/162080.929806219  
 1 0.822080232 NDUFC2-KCTD14 1  
 GO:0008536 MF Ran GTPase binding 1/1066 39/162080.929806219 1 0.822080232  
 RANBP3L 1  
 GO:0018024 MF histone-lysine N-methyltransferase activity 1/1066 39/162080.929806219  
 1 0.822080232 SMYD1 1  
 GO:0050136 MF NADH dehydrogenase (quinone) activity 1/1066 39/162080.929806219  
 1 0.822080232 NDUFC2-KCTD14 1  
 GO:0005342 MF organic acid transmembrane transporter activity 6/1066 149/16208  
 0.932465496 1 0.822080232 ABCC2/AKR1C4/SLC13A2/SLC17A4/SLC26A3/SLC6A7 6  
 GO:0035257 MF nuclear hormone receptor binding 6/1066 149/16208 0.932465496 1  
 0.822080232 FLT3/FOXP2/PRKCB/TGFB1I1/CRX/FOXH1 6  
 GO:0046943 MF carboxylic acid transmembrane transporter activity 6/1066 149/16208  
 0.932465496 1 0.822080232 ABCC2/AKR1C4/SLC13A2/SLC17A4/SLC26A3/SLC6A7 6  
 GO:0001784 MF phosphotyrosine residue binding 1/1066 40/162080.934433999 1  
 0.822080232 SHD 1  
 GO:0051879 MF Hsp90 protein binding 1/1066 40/162080.934433999 1 0.822080232  
 UNC45B 1  
 GO:0031490 MF chromatin DNA binding 3/1066 88/162080.93478367 1 0.822080232  
 ATOH1/GRHL3/PRDM12 3  
 GO:1990782 MF protein tyrosine kinase binding 3/1066 89/162080.937909407 1  
 0.822080232 ANGPT4/MYOC/NRG3 3  
 GO:0048365 MF Rac GTPase binding 2/1066 67/162080.940441626 1 0.822080232  
 FLNA/NOX1 2  
 GO:0015932 MF nucleobase-containing compound transmembrane transporter activity  
 1/1066 42/162080.942795113 1 0.822080232 SLC28A2 1  
 GO:0016746 MF transferase activity, transferring acyl groups 11/1066 250/16208  
 0.943971019 1 0.822080232  
 CHAT/F13A1/GGT5/GGT6/GLYATL1/MOGAT2/MOGAT3/NAT2/TGM3/ZDHHC11/ZDHHC11B  
 11  
 GO:0031072 MF heat shock protein binding 4/1066 113/16208 0.944658989 1  
 0.822080232 ITGB2/UNC45B/APOA1/APOA2 4  
 GO:0019207 MF kinase regulator activity 8/1066 194/16208 0.945803676 1  
 0.822080232 ANGPT4/CCNA1/GREM1/NRG3/TCL1A/CNTD2/EPO/PPP1R1B 8  
 GO:0034062 MF 5'-3' RNA polymerase activity 1/1066 43/162080.946567252 1  
 0.822080232 TERT1  
 GO:0097747 MF RNA polymerase activity 1/1066 43/162080.946567252 1 0.822080232  
 TERT1  
 GO:0016835 MF carbon-oxygen lyase activity 2/1066 69/162080.946762556 1  
 0.822080232 CA1/CA4 2  
 GO:0061630 MF ubiquitin protein ligase activity 9/1066 215/16208 0.948992684 1  
 0.822080232 ASB2/PDZD4/PDZRN4/RNF150/RNF165/TRIM58/RNF183/RNF186/TRIM71  
 9  
 GO:0070491 MF repressing transcription factor binding 2/1066 70/162080.94967814 1

0.822080232 MAGEA2/MAGEA2B 2  
 GO:0003714 MF transcription corepressor activity 10/1066 235/16208 0.950541475 1  
 0.822080232  
 AEBP1/ELANE/HEYL/RUNX1T1/SMYD1/WWTR1/ZFPM2/CDX2/TCP10/TCP10L2 10  
 GO:0016741 MF transferase activity, transferring one-carbon groups 8/1066 197/16208  
 0.951346449 1 0.822080232  
 BHMT2/INMT/METTL24/PRDM8/SMYD1/OTC/PNMT/PRDM12 8  
 GO:0016279 MF protein-lysine N-methyltransferase activity 1/1066 47/16208 0.95932889  
 1 0.822080232 SMYD1 1  
 GO:0050662 MF coenzyme binding 12/1066 279/16208 0.959540168 1 0.822080232  
 AOX1/CYBB/FMO1/FMO2/GADL1/PYGM/AGXT/AGXT2/DDC/IYD/NOX1/XDH 12  
 GO:0016278 MF lysine N-methyltransferase activity 1/1066 48/16208 0.962011608 1  
 0.822080232 SMYD1 1  
 GO:0008509 MF anion transmembrane transporter activity 14/1066 320/16208  
 0.963738937 1 0.822080232  
 ADAMTS8/GABRA5/LRRC18/SLC12A3/SLC6A2/ABCC2/AKR1C4/CLCA4/GABRA4/SLC13A2/SLC  
 17A4/SLC26A3/SLC34A3/SLC6A7 14  
 GO:0008028 MF monocarboxylic acid transmembrane transporter activity 1/1066  
 49/16208 0.964517525 1 0.822080232 AKR1C4 1  
 GO:0008168 MF methyltransferase activity 7/1066 186/16208 0.96514783 1  
 0.822080232 BHMT2/INMT/METTL24/PRDM8/SMYD1/PNMT/PRDM12 7  
 GO:0042623 MF ATPase activity, coupled 11/1066 265/16208 0.965659074 1  
 0.822080232  
 ABCA8/ABCA9/ABCB5/ABCC9/ATP1A2/ATP1A4/ATP2B2/TNNT3/ABCC2/ATP2C2/ATP6V1C2  
 11  
 GO:0000049 MF tRNA binding 1/1066 50/16208 0.966858284 1 0.822080232 TERT1  
 GO:0015631 MF tubulin binding 14/1066 323/16208 0.966932451 1 0.822080232  
 CCDC69/CLIP3/CRYAB/DPYSL5/MAP1A/MAP1LC3C/NAV3/NDN/NME8/SLC6A2/STMN2/STM  
 N4/SYT11/STMND114  
 GO:0003729 MF mRNA binding 10/1066 248/16208 0.968281513 1 0.822080232  
 CELF2/CPEB1/DAZL/PABPC5/QKI/RBM24/RBPMS2/A1CF/APOBEC1/IGF2BP1 10  
 GO:0015179 MF L-amino acid transmembrane transporter activity 1/1066 51/16208  
 0.969044759 1 0.822080232 SLC6A7 1  
 GO:0045309 MF protein phosphorylated amino acid binding 1/1066 51/16208 0.969044759  
 1 0.822080232 SHD 1  
 GO:0035591 MF signaling adaptor activity 2/1066 79/16208 0.969874617 1  
 0.822080232 SLA/SORBS1 2  
 GO:0042054 MF histone methyltransferase activity 1/1066 52/16208 0.971087111 1  
 0.822080232 SMYD1 1  
 GO:0043022 MF ribosome binding 1/1066 52/16208 0.971087111 1 0.822080232  
 CPEB1 1  
 GO:0140104 MF molecular carrier activity 1/1066 52/16208 0.971087111 1  
 0.822080232 NGB 1  
 GO:0008170 MF N-methyltransferase activity 2/1066 80/16208 0.971561971 1

0.822080232 SMYD1/PNMT 2  
 GO:0016407 MF acetyltransferase activity 3/1066 107/16208 0.975069268 1  
 0.822080232 CHAT/MOGAT2/NAT2 3  
 GO:0051219 MF phosphoprotein binding 2/1066 83/16208 0.976094416 1 0.822080232  
 DPYS/SHD 2  
 GO:0001098 MF basal transcription machinery binding 1/1066 55/16208 0.976441265 1  
 0.822080232 AR 1  
 GO:0001099 MF basal RNA polymerase II transcription machinery binding 1/1066  
 55/16208 0.976441265 1 0.822080232 AR 1  
 GO:0008234 MF cysteine-type peptidase activity 6/1066 176/16208 0.977518386 1  
 0.822080232 CLC/PGPEP1L/SFRP1/UCHL1/CAPN13/TINAG 6  
 GO:0051287 MF NAD binding 1/1066 56/16208 0.977995998 1 0.822080232 AOX1  
 1  
 GO:0003774 MF motor activity 4/1066 134/16208 0.979346507 1 0.822080232  
 GPR88/MYH11/MYH4/MYO1A 4  
 GO:0004860 MF protein kinase inhibitor activity 1/1066 58/16208 0.98080468 1  
 0.822080232 PPP1R1B 1  
 GO:0004553 MF hydrolase activity, hydrolyzing O-glycosyl compounds 2/1066 87/16208  
 0.981063494 1 0.822080232 LYZL4/SI 2  
 GO:0051213 MF dioxygenase activity 2/1066 88/16208 0.982139769 1 0.822080232  
 CDO1/IDO2 2  
 GO:0019210 MF kinase inhibitor activity 1/1066 61/16208 0.984360544 1 0.822080232  
 PPP1R1B 1  
 GO:0000287 MF magnesium ion binding 7/1066 206/16208 0.98449907 1  
 0.822080232 ADCY2/ATP8B2/NT5C1A/PGM5/ALPI/ATP10B/PCK1 7  
 GO:0016779 MF nucleotidyltransferase activity 3/1066 117/16208 0.985279513 1  
 0.822080232 MAB21L1/PCYT1B/TERT 3  
 GO:0035091 MF phosphatidylinositol binding 8/1066 233/16208 0.987860843 1  
 0.822080232 ACTN2/CLVS2/FERMT2/GAP43/JPH2/PHLDA3/SNAP91/THY1 8  
 GO:0051082 MF unfolded protein binding 3/1066 121/16208 0.988116894 1  
 0.822080232 CRYAB/DNAJB5/HSPB6 3  
 GO:0004725 MF protein tyrosine phosphatase activity 2/1066 98/16208 0.990103233 1  
 0.822080232 PTPRC/PTPRS 2  
 GO:0019001 MF guanyl nucleotide binding 14/1066 361/16208 0.990493524 1  
 0.822080232  
 ANXA6/CNGA3/DIRAS1/EHD2/GNAO1/MAB21L1/MRAS/RAB31/RERGL/TUBA1A/CNGB3/GU  
 CY2C/PCK1/RHOV 14  
 GO:0032561 MF guanyl ribonucleotide binding 14/1066 361/16208 0.990493524 1  
 0.822080232  
 ANXA6/CNGA3/DIRAS1/EHD2/GNAO1/MAB21L1/MRAS/RAB31/RERGL/TUBA1A/CNGB3/GU  
 CY2C/PCK1/RHOV 14  
 GO:0008017 MF microtubule binding 8/1066 239/16208 0.990512287 1  
 0.822080232 CCDC69/CLIP3/CRYAB/DPYSL5/MAP1A/MAP1LC3C/NAV3/NME88  
 GO:0016747 MF transferase activity, transferring acyl groups other than amino-acyl groups

7/1066 219/16208 0.99108161 1 0.822080232  
 CHAT/GLYATL1/MOGAT2/MOGAT3/NAT2/ZDHHC11/ZDHHC11B 7  
 GO:0015171 MF amino acid transmembrane transporter activity 1/1066 71/16208  
 0.992101966 1 0.822080232 SLC6A7 1  
 GO:0016410 MF N-acyltransferase activity 2/1066 103/16208 0.992656735 1  
 0.822080232 GLYATL1/NAT2 2  
 GO:0043130 MF ubiquitin binding 1/1066 73/16208 0.993111008 1 0.822080232  
 UCHL1 1  
 GO:0008276 MF protein methyltransferase activity 1/1066 74/16208 0.993566147 1  
 0.822080232 SMYD1 1  
 GO:0008757 MF S-adenosylmethionine-dependent methyltransferase activity 3/1066  
 134/16208 0.994144092 1 0.822080232 INMT/SMYD1/PNMT 3  
 GO:0008514 MF organic anion transmembrane transporter activity 6/1066 207/16208  
 0.994353009 1 0.822080232 ABCC2/AKR1C4/SLC13A2/SLC17A4/SLC26A3/SLC6A7 6  
 GO:0003678 MF DNA helicase activity 1/1066 76/16208 0.994388276 1 0.822080232  
 HFM1 1  
 GO:0047485 MF protein N-terminus binding 2/1066 108/16208 0.99456191 1  
 0.822080232 DCN/TERT 2  
 GO:0016798 MF hydrolase activity, acting on glycosyl bonds 2/1066 110/16208  
 0.99517998 1 0.822080232 LYZL4/SI 2  
 GO:0005089 MF Rho guanyl-nucleotide exchange factor activity 1/1066 79/16208  
 0.995428909 1 0.822080232 ARHGEF25 1  
 GO:0005525 MF GTP binding 12/1066 342/16208 0.995618159 1 0.822080232  
 ANXA6/DIRAS1/EHD2/GNAO1/MAB21L1/MRAS/RAB31/RERGL/TUBA1A/GUCY2C/PCK1/RHO  
 V 12  
 GO:0008135 MF translation factor activity, RNA binding 1/1066 80/16208 0.995731022 1  
 0.822080232 CPEB1 1  
 GO:0032550 MF purine ribonucleoside binding 12/1066 346/16208 0.996243024 1  
 0.822080232  
 ANXA6/DIRAS1/EHD2/GNAO1/MAB21L1/MRAS/RAB31/RERGL/TUBA1A/GUCY2C/PCK1/RHO  
 V 12  
 GO:0001883 MF purine nucleoside binding 12/1066 349/16208 0.996655434 1  
 0.822080232  
 ANXA6/DIRAS1/EHD2/GNAO1/MAB21L1/MRAS/RAB31/RERGL/TUBA1A/GUCY2C/PCK1/RHO  
 V 12  
 GO:0032549 MF ribonucleoside binding 12/1066 350/16208 0.996783123 1  
 0.822080232  
 ANXA6/DIRAS1/EHD2/GNAO1/MAB21L1/MRAS/RAB31/RERGL/TUBA1A/GUCY2C/PCK1/RHO  
 V 12  
 GO:0016887 MF ATPase activity 12/1066 351/16208 0.996906194 1 0.822080232  
 ABCA8/ABCA9/ABCB5/ABCC9/ATP1A2/ATP1A4/ATP2B2/TNNT3/ABCC2/ATP2C2/ATP6V1C2/  
 MYH4 12  
 GO:0008080 MF N-acetyltransferase activity 1/1066 87/16208 0.997355164 1  
 0.822080232 NAT2 1

GO:0005549 MF odorant binding 1/1066 88/162080.997530054 1 0.822080232  
OBP2B 1

GO:0001882 MF nucleoside binding 12/1066 357/16208 0.997556006 1 0.822080232  
ANXA6/DIRAS1/EHD2/GNAO1/MAB21L1/MRAS/RAB31/RERGL/TUBA1A/GUCY2C/PCK1/RHO  
V 12

GO:0016874 MF ligase activity 2/1066 122/16208 0.997675887 1 0.822080232  
UCHL1/TLL2 2

GO:0003924 MF GTPase activity 9/1066 296/16208 0.997879198 1 0.822080232  
DIRAS1/GNAO1/MRAS/RAB31/RERGL/RGS4/TUBA1A/GNGT1/RHOV 9

GO:0043021 MF ribonucleoprotein complex binding 2/1066 126/16208 0.998181061  
1 0.822080232 CPEB1/APOBEC1 2

GO:0032182 MF ubiquitin-like protein binding 1/1066 93/162080.998245704 1  
0.822080232 UCHL1 1

GO:0045296 MF cadherin binding 9/1066 308/16208 0.998745622 1 0.822080232  
CALD1/CDH10/CDH11/CDH19/CDH2/CTNNA3/FLNA/CDH17/OLFM4 9

GO:0004843 MF thiol-dependent ubiquitin-specific protease activity 1/1066 102/16208  
0.999052607 1 0.822080232 UCHL1 1

GO:0016791 MF phosphatase activity 6/1066 250/16208 0.999290664 1  
0.822080232 NT5C1A/PTPRC/PTPRS/ALPI/FBP2/G6PC 6

GO:0003697 MF single-stranded DNA binding 1/1066 107/16208 0.999327315 1  
0.822080232 MCMDC2 1

GO:0036459 MF thiol-dependent ubiquitinyl hydrolase activity 1/1066 107/16208  
0.999327315 1 0.822080232 UCHL1 1

GO:0101005 MF ubiquitinyl hydrolase activity 1/1066 107/16208 0.999327315 1  
0.822080232 UCHL1 1

GO:0044389 MF ubiquitin-like protein ligase binding 8/1066 299/16208 0.999331521  
1 0.822080232 EGR2/MAP1LC3C/NGFR/PTPRN/SYT11/UCHL1/MAGEA2/MAGEA2B 8

GO:0017048 MF Rho GTPase binding 3/1066 174/16208 0.999393427 1  
0.822080232 ARHGEF25/FLNA/NOX1 3

GO:0042578 MF phosphoric ester hydrolase activity 10/1066 347/16208 0.999396902  
1 0.822080232 EDNRA/NT5C1A/PDE3A/PLCXD3/PLD4/PTPRC/PTPRS/ALPI/FBP2/G6PC  
10

GO:0031625 MF ubiquitin protein ligase binding 7/1066 282/16208 0.999514309 1  
0.822080232 EGR2/MAP1LC3C/NGFR/SYT11/UCHL1/MAGEA2/MAGEA2B 7

GO:0019783 MF ubiquitin-like protein-specific protease activity 1/1066 116/16208  
0.999636924 1 0.822080232 UCHL1 1

GO:0005085 MF guanyl-nucleotide exchange factor activity 4/1066 212/16208  
0.999655228 1 0.822080232 ARHGEF25/P2RY12/PSD/RASGEF1C 4

GO:0005096 MF GTPase activator activity 6/1066 267/16208 0.999699962 1  
0.822080232 ADGRB3/ARHGAP20/ARHGAP31/RANBP3L/RGS4/THY1 6

GO:0004842 MF ubiquitin-protein transferase activity 10/1066 366/16208 0.999742907  
1 0.822080232  
ASB2/MAGEL2/PDZD4/PDZRN4/RNF150/RNF165/TRIM58/RNF183/RNF186/TRIM71 10

GO:0042393 MF histone binding 3/1066 189/16208 0.999747783 1 0.822080232

NAP1L2/PRKCB/CTCF 3

GO:0019787 MF ubiquitin-like protein transferase activity 11/1066 391/16208  
0.999767079 1 0.822080232  
ASB2/EGR2/MAGEL2/PDZD4/PDZRN4/RNF150/RNF165/TRIM58/RNF183/RNF186/TRIM71  
11

GO:0030695 MF GTPase regulator activity 7/1066 298/16208 0.999779314 1  
0.822080232 ADGRB3/ARHGAP20/ARHGAP31/RANBP3L/RGS4/SLIT2/THY1 7

GO:0060589 MF nucleoside-triphosphatase regulator activity 8/1066 336/16208  
0.999886677 1 0.822080232  
ADGRB3/ARHGAP20/ARHGAP31/PLN/RANBP3L/RGS4/SLIT2/THY1 8

GO:0005088 MF Ras guanyl-nucleotide exchange factor activity 1/1066 136/16208  
0.999907891 1 0.822080232 ARHGEF25 1

GO:0140030 MF modification-dependent protein binding 1/1066 137/16208  
0.999914 1 0.822080232 ANK2 1

GO:0004721 MF phosphoprotein phosphatase activity 2/1066 177/16208 0.999925098  
1 0.822080232 PTPRC/PTPRS 2

GO:0003735 MF structural constituent of ribosome 1/1066 157/16208 0.999978223 1  
0.822080232 RPL3L 1

GO:0004386 MF helicase activity 1/1066 157/16208 0.999978223 1 0.822080232  
HFM1 1

GO:0140097 MF catalytic activity, acting on DNA 2/1066 201/16208 0.999983827 1  
0.822080232 HFM1/TERT 2

GO:0017137 MF Rab GTPase binding 1/1066 170/16208 0.99999109 1  
0.822080232 NGFR 1

GO:0004674 MF protein serine/threonine kinase activity 7/1066 426/16208  
0.999999756 1 0.822080232 AKT3/CAMK2A/DCLK1/LTBP1/MYLK/NRK/PRKCB 7

GO:0031267 MF small GTPase binding 6/1066 434/16208 0.999999971 1  
0.822080232 ADCYAP1R1/ARHGEF25/FLNA/NGFR/RANBP3L/NOX1 6

GO:0017016 MF Ras GTPase binding 5/1066 420/16208 0.999999989 1 0.822080232  
ARHGEF25/FLNA/NGFR/RANBP3L/NOX1 5

GO:0004984 MF olfactory receptor activity 2/1066 379/16208 1 1 0.822080232  
OR2W3/OR56B1 2

GO:0140098 MF catalytic activity, acting on RNA 1/1066 340/16208 1 1  
0.822080232 TERT1

GO:0062023 CC collagen-containing extracellular matrix 129/1182399/17056 4.7E-53  
2.44E-50 1.94E-50  
A2M/ABI3BP/ADAMTS1/ADAMTS2/ADAMTS8/ADIPOQ/AEBP1/ANGPTL2/ANXA6/APOE/ASP  
N/BGN/C1QA/C1QB/C1QC/CBLN1/CBLN4/CCDC80/CDH2/CILP/CLC/CMA1/COL10A1/COL11A1/C  
OL14A1/COL15A1/COL19A1/COL1A1/COL1A2/COL25A1/COL3A1/COL4A3/COL4A4/COL5A1/COL6  
A1/COL6A2/COL6A3/COL8A1/COL8A2/COMP/CTSG/CXCL12/DCN/DPT/EFEMP1/EFEMP2/ELANE/  
ELN/EMILIN1/F13A1/FBLN1/FBLN2/FBLN5/FBN1/FCN1/FGF10/FGL2/FLG/FN1/GDF10/GREM1/H  
MCN1/ITIH5/KRT1/LAMA2/LTBP1/LTBP2/LUM/MFAP4/MFAP5/MGP/MMP2/MMRN1/MXRA7/MY  
OC/NCAM1/NTN3/OGN/OMD/PODN/PRELP/PRG4/PZP/SDC3/SERPINA3/SERPINE1/SERPINF1/SER  
PING1/SFRP1/SFRP2/SMOC2/SOD3/SPARC/SPARCL1/SPON1/SSC5D/SULF1/TGFB11/TGFB3/THBS

1/THBS2/THBS4/TIMP2/TIMP3/TNC/TNR/TNXB/VCAN/VIT/AMBP/APOA1/APOA4/APOC3/APOH/B  
MP7/DEFA1/F2/FGA/FGB/FGG/HAPLN1/HRG/MUC17/ORM1/ORM2/PRSS1/S100A7/TINAG/ZG16  
129

GO:0044420 CC extracellular matrix component 21/1182 51/170565.84E-12 1.52E-09  
1.21E-09

COL11A1/COL14A1/COL15A1/COL1A1/COL1A2/COL3A1/COL4A3/COL4A4/COL5A1/COL8A1/  
ELN/EMILIN1/FBLN1/FBLN5/FBN1/LTBP1/LUM/MFAP4/MFAP5/TNC/TNR 21

GO:0009897 CC external side of plasma membrane 56/1182 313/17056 4.25E-11  
7.36E-09 5.86E-09

ANTXR1/ASTN1/CCR2/CCR4/CCR7/CCR8/CD1C/CXCL12/CXCL9/ENOX1/EPHA5/FCER2/FCGR2  
B/FCGR3A/FCN1/FCRL6/FOLR2/GFRA1/GFRA2/GHR/GPIHBP1/HEG1/IL12B/IL31RA/ITGB2/KCNJ5/  
KLRC4-KLRK1/MS4A1/NCAM1/NLGN1/P2RY12/PECAM1/PRND/PTPRC/SELP/SSC5D/THBS1/THY1/  
TLR8/VCAM1/XCR1/BTNL3/BTNL8/CA4/DMBT1/F2/FGA/FGB/FGG/FOLR1/HHLA2/IL17A/LY6G6C/  
MUC17/PCSK9/TFR2 56

GO:0005581 CC collagen trimer 26/1182 87/170569.37E-11 1.22E-08 9.69E-09

ADIPOQ/C1QA/C1QB/C1QC/COL10A1/COL11A1/COL14A1/COL15A1/COL19A1/COL1A1/COL  
1A2/COL25A1/COL3A1/COL4A3/COL4A4/COL5A1/COL6A1/COL6A2/COL6A3/COL8A1/COL8A2/CO  
LEC12/DCN/EMILIN1/FCN1/LUM 26

GO:0005788 CC endoplasmic reticulum lumen 52/1182 301/17056 7.74E-10  
8.05E-08 0.000000064

APOE/ARSL/BCHE/CASQ1/CASQ2/CDH2/CERCAM/CHRD1/COL10A1/COL11A1/COL14A1/CO  
L15A1/COL19A1/COL1A1/COL1A2/COL25A1/COL3A1/COL4A3/COL4A4/COL5A1/COL6A1/COL6A2  
/COL6A3/COL8A1/COL8A2/FBN1/FLT3/FMO1/FN1/FSTL1/IGFBP4/IGFBP5/IL12B/LTBP1/PENK/PRS  
S23/SPARCL1/SPON1/THBS1/TNC/VCAN/APOA1/APOA2/APOA4/APOA5/F2/FGA/FGF23/FGG/MT  
TP/PCSK9/SERPINA10 52

GO:0098552 CC side of membrane 71/1182 499/17056 4.84E-09 0.000000419  
0.000000334

ANTXR1/ASTN1/BLK/CCR2/CCR4/CCR7/CCR8/CD1C/CXCL12/CXCL9/ENOX1/EPHA5/FCER2/FC  
GR2B/FCGR3A/FCN1/FCRL6/FERMT2/FOLR2/GFRA1/GFRA2/GHR/GNAO1/GPIHBP1/HEG1/HLA-D  
PA1/HLA-DPB1/HLA-DQA1/HLA-DQA2/HLA-DQB2/IL12B/IL31RA/ITGB2/KCNIP1/KCNJ5/KLRC4-KLR  
K1/MS4A1/NCAM1/NLGN1/P2RY12/PECAM1/PGM5/PRND/PTPRC/SELP/SSC5D/STAC/THBS1/THY  
1/TLR8/VCAM1/XCR1/ATP2C2/BTNL3/BTNL8/CA4/DMBT1/DSG1/F2/FGA/FGB/FGG/FOLR1/GNGT  
1/HHLA2/IL17A/LY6G6C/MUC17/PCSK9/TFR2/TGM3 71

GO:0072562 CC blood microparticle 27/1182 112/17056 7.87E-09 0.000000584  
0.000000465

A2M/ACTG2/APOE/BCHE/C1QB/C1QC/C1R/C1S/CFHR1/F13A1/FN1/KRT1/PZP/SERPINA3/SE  
RPING1/AMBP/APOA1/APOA2/APOA4/F2/FGA/FGB/FGG/HRG/ORM1/ORM2/PRSS1 27

GO:0099240 CC intrinsic component of synaptic membrane 33/1182 161/17056  
1.43E-08 0.000000929 0.000000739

CACNG7/CADM3/CDH10/CDH2/CHRM2/CHRNA6/CNR1/CNTN1/EPHA7/FXYD6/GABRA5/GP  
M6A/GRIA1/GRIK5/HTR2A/HTR3A/KCNA1/KCNA2/LRFN5/LRRC4C/LRRTM1/NETO1/NLGN1/NRP2  
/NTNG1/PTPRS/SLC8A1/SLITRK3/SORCS3/SYT11/SYT6/GABRA4/P2RX3 33

GO:0099699 CC integral component of synaptic membrane 31/1182 149/17056  
0.000000027 0.00000156 0.00000124

CACNG7/CADM3/CDH10/CDH2/CHRM2/CHRNA6/CNR1/EPHA7/FXYD6/GABRA5/GPM6A/GRIA1/GRIK5/HTR2A/HTR3A/KCNA1/KCNA2/LRFN5/LRRC4C/LRRTM1/NETO1/NLGN1/NRP2/PTPRS/SLC8A1/SLITRK3/SORCS3/SYT11/SYT6/GABRA4/P2RX3 31

GO:0031091 CC platelet alpha granule 23/1182 90/170560.000000031 0.00000161  
0.00000128

A2M/ACTN2/F13A1/FN1/IGF1/ISLR/MMRN1/PCDH7/PECAM1/SELP/SERPINA3/SERPINE1/SERPING1/SPARC/TGFB3/THBS1/THBS2/FGA/FGB/FGG/HRG/ORM1/ORM2 23

GO:0005604 CC basement membrane 23/1182 93/170560.00000006 0.00000267  
0.00000212

ADAMTS1/CCDC80/COL15A1/COL4A3/COL4A4/COL5A1/COL8A1/COL8A2/EFEMP2/FBLN1/FBN1/FN1/HMCN1/LAMA2/NTN3/SERPINF1/SMOC2/SPARC/THBS2/THBS4/TIMP3/TNC/TINAG 23

GO:0031093 CC platelet alpha granule lumen 19/1182 66/170566.15E-08 0.00000267  
0.00000212

A2M/ACTN2/F13A1/FN1/IGF1/ISLR/MMRN1/SERPINA3/SERPINE1/SERPING1/SPARC/TGFB3/THBS1/FGA/FGB/FGG/HRG/ORM1/ORM2 19

GO:0042383 CC sarcolemma 28/1182 134/17056 0.000000114 0.00000457  
0.00000364

ABCC9/AHNAK2/ANK2/ATP1A2/BGN/BVES/CACNG7/CASQ1/CDH2/COL6A1/COL6A2/COL6A3/DES/FLNC/KCNB1/KCNJ5/LAMA2/PGM5/POPDC2/SGCD/SGCG/SLC8A1/SNTG2/STAC/SYNC/SYNM/TGFB3/VCAM1 28

GO:0044449 CC contractile fiber part 38/1182 219/17056 0.000000131 0.00000487  
0.00000387

ABCC9/ACTA2/ACTN2/AHNAK2/ANK2/ARHGEF25/CASQ1/CASQ2/CRYAB/DES/FERMT2/FLNA/FLNC/IGFN1/JPH2/KCNA5/LDB3/LMOD1/MMP2/MYH11/MYL3/MYL9/MYOZ2/PALD/PDLIM3/PECAM1/PGM5/SLC8A1/SMPX/SYNC/SYNE1/SYNM/SYNPO2/TNNT3/TPM2/AKAP4/FBP2/MYH4 38

GO:0043292 CC contractile fiber 39/1182 232/17056 0.000000213 0.00000738  
0.00000587

ABCC9/ACTA2/ACTN2/AHNAK2/ANK2/ARHGEF25/CALD1/CASQ1/CASQ2/CRYAB/DES/FERMT2/FLNA/FLNC/IGFN1/JPH2/KCNA5/LDB3/LMOD1/MMP2/MYH11/MYL3/MYL9/MYOZ2/PALD/PDLIM3/PECAM1/PGM5/SLC8A1/SMPX/SYNC/SYNE1/SYNM/SYNPO2/TNNT3/TPM2/AKAP4/FBP2/MYH4 39

GO:0098936 CC intrinsic component of postsynaptic membrane 25/1182 120/17056  
0.000000572 0.0000186 0.0000148

CACNG7/CDH10/CDH2/CHRM2/CHRNA6/CNTN1/EPHA7/FXYD6/GABRA5/GRIA1/GRIK5/HTR2A/HTR3A/KCNA1/LRFN5/LRRC4C/LRRTM1/NETO1/NLGN1/NRP2/PTPRS/SLC8A1/SLITRK3/SORCS3/GABRA4 25

GO:0099055 CC integral component of postsynaptic membrane 24/1182 115/17056  
0.000000927 0.0000284 0.0000226

CACNG7/CDH10/CDH2/CHRM2/CHRNA6/EPHA7/FXYD6/GABRA5/GRIA1/GRIK5/HTR2A/HTR3A/KCNA1/LRFN5/LRRC4C/LRRTM1/NETO1/NLGN1/NRP2/PTPRS/SLC8A1/SLITRK3/SORCS3/GABRA4 24

GO:0043025 CC neuronal cell body 63/1182 487/17056 0.00000113 0.0000325  
0.0000259

ADAM21/ADCYAP1/AKAP12/APOE/ASTN1/BRINP3/CACNG7/CCR2/CCR4/CD22/CHRM2/CHRNA3/CNGA3/CNKSR2/CRYAB/CYBB/DPYSL5/EPHA5/EPHA7/FLNA/GABRA5/GPM6A/GRIA1/GRIK3/GRIK5/HTR2A/HTR3A/KCNA1/KCNA2/KCNB1/KCNK2/KLHL14/MAP1A/NDN/NGB/P2RX2/PENK/PNOC/PTPRN/PTPRS/PVALB/ROR2/SERPINF1/SEZ6L/SLC6A2/STMN2/SYT4/TAC1/TGFB3/THY1/TIMP2/TNN/UCHL1/VIP/DDC/DDN/EFNA2/KISS1/NPFF/P2RX3/PPP1R1B/REG1A/TRPM5 63

GO:0030017 CC sarcomere 34/1182 202/17056 0.00000122 0.0000335  
0.0000266

ABCC9/ACTN2/AHNAK2/ANK2/ARHGEF25/CASQ1/CASQ2/CRYAB/DES/FERMT2/FLNA/FLNC/IGFN1/JPH2/KCNA5/LDB3/LMOD1/MMP2/MYL3/MYL9/MYOZ2/PALD/PDLIM3/PGM5/SLC8A1/SMPX/SYNC/SYNE1/SYNPO2/TNNT3/TPM2/AKAP4/FBP2/MYH4 34

GO:0030016 CC myofibril 36/1182 222/17056 0.0000015 0.0000389 0.0000309

ABCC9/ACTN2/AHNAK2/ANK2/ARHGEF25/CALD1/CASQ1/CASQ2/CRYAB/DES/FERMT2/FLNA/FLNC/IGFN1/JPH2/KCNA5/LDB3/LMOD1/MMP2/MYL3/MYL9/MYOZ2/PALD/PDLIM3/PGM5/SLC8A1/SMPX/SYNC/SYNE1/SYNM/SYNPO2/TNNT3/TPM2/AKAP4/FBP2/MYH4 36

GO:0098644 CC complex of collagen trimers 9/1182 19/17056 0.00000175 0.0000433  
0.0000345 COL11A1/COL1A1/COL1A2/COL3A1/COL4A3/COL4A4/COL5A1/COL8A1/LUM9

GO:0098889 CC intrinsic component of presynaptic membrane 19/1182 81/17056  
0.00000199 0.000047 0.0000374

CADM3/CDH10/CDH2/CHRM2/CHRNA6/CNR1/CNTN1/FXYD6/GABRA5/GPM6A/GRIK5/HTR2A/HTR3A/KCNA1/KCNA2/NTNG1/PTPRS/SYT11/P2RX3 19

GO:0005796 CC Golgi lumen 21/1182 99/17056 0.00000333 0.0000753 0.0000599

BGN/DCN/KERA/LUM/NGF/OGN/OMD/PRELP/SDC3/SOD3/VCAN/DEFA1/DEFB1/DEFB4A/F2/FGF23/MUC15/MUC17/MUC21/MUC4/ZG16 21

GO:0099056 CC integral component of presynaptic membrane 17/1182 72/17056  
0.00000619 0.000134193 0.000106757

CADM3/CDH10/CDH2/CHRM2/CHRNA6/CNR1/FXYD6/GABRA5/GPM6A/GRIK5/HTR2A/HTR3A/KCNA1/KCNA2/PTPRS/SYT11/P2RX3 17

GO:0042627 CC chylomicron 7/1182 13/17056 0.00000893 0.000185738 0.000147764  
APOE/APOA1/APOA2/APOA4/APOA5/APOC3/APOH 7

GO:0097060 CC synaptic membrane 54/1182 424/17056 0.0000103 0.000205976  
0.000163864

ACTN2/ANK2/ATP2B2/CACNG7/CADM3/CAMK2A/CBLN1/CDH10/CDH2/CHRM2/CHRNA3/CHRNA6/CNKSR2/CNR1/CNTN1/CPEB1/CRYAB/EPHA7/FXYD6/GABRA5/GPM6A/GRIA1/GRIK3/GRIK5/HTR2A/HTR3A/IL31RA/KCNA1/KCNA2/KCNB1/KCNMA1/KCTD8/LRFN5/LRRC4C/LRRTM1/NETO1/NLGN1/NRP2/NTNG1/PTPRS/SHANK1/SHISA8/SLC6A2/SLC8A1/SLITRK3/SNAP91/SORCS3/SYNDIG1/SYNE1/SYT11/SYT6/DDN/GABRA4/P2RX3 54

GO:0031674 CC I band 25/1182 142/17056 0.0000138 0.000265013 0.00021083

ACTN2/AHNAK2/ANK2/CASQ1/CASQ2/CRYAB/DES/FERMT2/FLNA/FLNC/IGFN1/JPH2/KCNA5/LDB3/MYL3/MYL9/MYOZ2/PALD/PDLIM3/PGM5/SLC8A1/SYNC/SYNPO2/AKAP4/FBP2 25

GO:0034705 CC potassium channel complex 19/1182 95/17056 0.0000234 0.000434003  
0.000345269

ABCC9/DPP6/GRIK3/GRIK5/KCNA1/KCNA2/KCNA4/KCNA5/KCNB1/KCNE4/KCNIP1/KCNJ5/KCNK2/KCNK4/KCNMA1/KCNMB1/KCNQ5/LRRC38/KCNV1 19

GO:0099060 CC integral component of postsynaptic specialization membrane 16/1182  
72/170560.0000261 0.000467491 0.000371911  
CACNG7/CDH10/CDH2/EPHA7/GABRA5/GRIA1/GRIK5/LRFN5/LRRC4C/LRRTM1/NETO1/NLG  
N1/PTPRS/SLITRK3/SORCS3/GABRA4 16

GO:0030018 CC Z disc 23/1182 131/17056 0.0000314 0.00054415 0.000432896  
ACTN2/AHNAK2/ANK2/CASQ1/CASQ2/CRYAB/DES/FLNA/FLNC/IGFN1/JPH2/KCNA5/LDB3/M  
YL9/MYOZ2/PALLD/PDLIM3/PGM5/SLC8A1/SYNC/SYNPO2/AKAP4/FBP2 23

GO:0005583 CC fibrillar collagen trimer 6/1182 11/170560.0000373 0.000598597  
0.000476212 COL11A1/COL1A1/COL1A2/COL3A1/COL5A1/LUM 6

GO:0098643 CC banded collagen fibril 6/1182 11/170560.0000373 0.000598597  
0.000476212 COL11A1/COL1A1/COL1A2/COL3A1/COL5A1/LUM 6

GO:0034364 CC high-density lipoprotein particle 9/1182 26/170560.000038 0.000598597  
0.000476212 APOE/APOA1/APOA2/APOA4/APOA5/APOC3/APOH/SAA2/SAA4 9

GO:0099634 CC postsynaptic specialization membrane 19/1182 99/170560.0000427  
0.000652958 0.000519458  
ACTN2/ATP2B2/CACNG7/CDH10/CDH2/CNKSR2/EPHA7/GABRA5/GRIA1/GRIK5/LRFN5/LRRC  
4C/LRRTM1/NETO1/NLGN1/PTPRS/SLITRK3/SORCS3/GABRA4 19

GO:0098948 CC intrinsic component of postsynaptic specialization membrane 16/1182  
75/170560.0000445 0.000656238 0.000522068  
CACNG7/CDH10/CDH2/EPHA7/GABRA5/GRIA1/GRIK5/LRFN5/LRRC4C/LRRTM1/NETO1/NLG  
N1/PTPRS/SLITRK3/SORCS3/GABRA4 16

GO:0043235 CC receptor complex 49/1182 393/17056 0.0000454 0.000656238  
0.000522068  
ADCYAP1R1/ADRB3/ALK/AXL/CACNG7/CHRNA3/CHRNA6/CR2/CSF1R/DDR2/EMILIN1/EPHA3  
/EPHA5/EPHA6/EPHA7/FGFR1/FLT3/GABRA5/GFRA1/GFRA2/GHR/GRIA1/GRIK3/GRIK5/HTR3A/IL  
12B/IL31RA/ITGA11/ITGAD/ITGB2/ITGBL1/KCTD8/NLGN1/NRP2/NTRK2/P2RX2/PDGFRB/PLXNA4/  
ROR2/SHANK1/SHISA8/SLITRK5/SORBS1/TLR7/ADGRV1/GABRA4/MTTP/P2RX3/TFR2 49

GO:0031225 CC anchored component of membrane 26/1182 164/17056 0.0000611  
0.000859137 0.000683484  
ART4/CNTN1/CPO/FOLR2/GAS1/GFRA1/GFRA2/GPIHBP1/LSAMP/NCAM1/NTM/NTNG1/PR  
ND/RGMA/THY1/ALPI/CA4/EFNA2/FOLR1/LY6G6C/LYPD8/RHBG/SPACA4/TECTB/TEX101/VNN3  
26

GO:0045211 CC postsynaptic membrane 41/1182 316/17056 0.0000767 0.001049928  
0.000835267  
ACTN2/ANK2/ATP2B2/CACNG7/CAMK2A/CBLN1/CDH10/CDH2/CHRM2/CHRNA3/CHRNA6/C  
NKSR2/CNTN1/CPEB1/EPHA7/FXYD6/GABRA5/GRIA1/GRIK3/GRIK5/HTR2A/HTR3A/KCNA1/KCNB  
1/KCNMA1/KCTD8/LRFN5/LRRC4C/LRRTM1/NETO1/NLGN1/NRP2/PTPRS/SHANK1/SHISA8/SLC8A  
1/SLITRK3/SORCS3/SYNDIG1/SYNE1/GABRA4 41

GO:1902495 CC transmembrane transporter complex 41/1182 317/17056 0.0000824  
0.001098336 0.000873778  
ABCC9/ATP1A2/ATP1A4/CACNA1G/CACNG7/CASQ2/CHRNA3/CHRNA6/CNGA3/DPP6/GABR  
A5/GRIA1/GRIK3/GRIK5/HTR3A/KCNA1/KCNA2/KCNA4/KCNA5/KCNB1/KCNE4/KCNIP1/KCNJ5/KC  
NK2/KCNK4/KCNMA1/KCNMB1/KCNQ5/LRRC18/LRRC38/NLGN1/PLN/SCN11A/SCN2B/SCN7A/SH  
ANK1/SHISA8/CNGB3/FXYD4/GABRA4/KCNV1 41

GO:1990351 CC transporter complex 41/1182 325/17056 0.000143065 0.00185985  
0.001479597  
ABCC9/ATP1A2/ATP1A4/CACNA1G/CACNG7/CASQ2/CHRNA3/CHRNA6/CNGA3/DPP6/GABR  
A5/GRIA1/GRIK3/GRIK5/HTR3A/KCNA1/KCNA2/KCNA4/KCNA5/KCNB1/KCNE4/KCNIP1/KCNJ5/KC  
NK2/KCNK4/KCNMA1/KCNMB1/KCNQ5/LRRC18/LRRC38/NLGN1/PLN/SCN11A/SCN2B/SCN7A/SH  
ANK1/SHISA8/CNGB3/FXYD4/GABRA4/KCNV1 41

GO:0034361 CC very-low-density lipoprotein particle 7/1182 19/170560.000181139  
0.002242671 0.001784149 APOE/APOA1/APOA2/APOA4/APOA5/APOC3/APOH 7

GO:0034385 CC triglyceride-rich plasma lipoprotein particle 7/1182 19/170560.000181139  
0.002242671 0.001784149 APOE/APOA1/APOA2/APOA4/APOA5/APOC3/APOH 7

GO:0034703 CC cation channel complex 30/1182 215/17056 0.000190939 0.002309031  
0.001836942  
ABCC9/CACNA1G/CACNG7/CASQ2/DPP6/GRIA1/GRIK3/GRIK5/HTR3A/KCNA1/KCNA2/KCNA  
4/KCNA5/KCNB1/KCNE4/KCNIP1/KCNJ5/KCNK2/KCNK4/KCNMA1/KCNMB1/KCNQ5/LRRC38/NLGN  
1/SCN11A/SCN2B/SCN7A/SHANK1/SHISA8/KCNV1 30

GO:0042613 CC MHC class II protein complex 6/1182 14/170560.000202357 0.002391486  
0.001902539 HLA-DOA/HLA-DPA1/HLA-DPB1/HLA-DQA1/HLA-DQA2/HLA-DQB2 6

GO:0042734 CC presynaptic membrane 24/1182 160/17056 0.000274367 0.003170468  
0.002522255  
CADM3/CDH10/CDH2/CHRM2/CHRNA6/CNR1/CNTN1/FXYD6/GABRA5/GPM6A/GRIK3/GRIK  
5/HTR2A/HTR3A/IL31RA/KCNA1/KCNA2/KCTD8/NTNG1/PTPRS/SLC6A2/SNAP91/SYT11/P2RX3  
24

GO:0044306 CC neuron projection terminus 21/1182 135/17056 0.000392382  
0.004435623 0.003528745  
ADCYAP1/ATCAY/CHRM2/GRIK3/GRIK5/KCNA1/KCNA2/KCNK2/NTRK2/PENK/PNOC/PRKCB/P  
TPRN/SCRG1/SLC18A3/SYT11/SYT4/TNN/UCHL1/NPFF/P2RX3 21

GO:0033267 CC axon part 44/1182 376/17056 0.000447196 0.004854621 0.003862077  
ADCYAP1/ANK2/BOC/CHRM2/CNGA3/CNR1/CRTAC1/DPYSL3/GAP43/GPM6A/GRIA1/GRIK3/  
GRIK5/KCNA1/KCNA2/KCNK2/LAMP5/LRRTM1/MAG/MAP1A/MYOC/NEFL/NFASC/NTRK2/PALLD/  
PCDH9/PENK/PNOC/PRKCB/PTPRN/SERPINF1/SLC18A3/SPOCK1/STMN2/STMN4/SYT11/THY1/TI  
MP2/TNN/UCHL1/IGF2BP1/NPFF/P2RX3/REG1A 44

GO:0098978 CC glutamatergic synapse 41/1182 343/17056 0.000448119 0.004854621  
0.003862077  
ACTN2/APOE/ATP2B2/CACNG7/CBLN1/CDH10/CDH11/CHRM2/CNKSR2/CNR1/EPHA7/FLNA  
/FXYD6/GPM6A/GRIA1/GRIK3/GRIK5/HTR2A/HTR3A/KCNA1/LRFN5/LRRC4C/LRRTM1/NETO1/NL  
GN1/NPTX1/NRG3/NRP2/NTNG1/PTPRS/SHANK1/SLC6A17/SLITRK2/SLITRK4/SORCS3/SPARC/SPA  
RCL1/SYT4/SYT6/TNR/PPP1R1B 41

GO:0044298 CC cell body membrane 8/1182 28/170560.000461911 0.004901915  
0.003899702 CD22/GABRA5/KCNA2/KCNB1/P2RY12/SLC6A2/THY1/REG1A 8

GO:0060205 CC cytoplasmic vesicle lumen 40/1182 334/17056 0.000503374  
0.005235088 0.004164757  
A2M/ACTN2/APOE/BPI/CRISPLD2/CTSG/ELANE/F13A1/FCN1/FN1/GRP/IGF1/ISLR/MMRN1/  
MPO/PCSK1/PENK/RETN/SERPINA3/SERPINE1/SERPING1/SPARC/TGFB3/THBS1/TIMP2/TIMP3/AP  
OA1/APOH/DEFA1/FGA/FGF/FGG/HRG/LCN2/OLFM4/ORM1/ORM2/S100A7/TTR/ZG16 40

GO:0046658 CC anchored component of plasma membrane 12/1182 58/170560.000526065  
0.005344402 0.004251721  
CNTN1/CPO/FOLR2/GAS1/GPIHBP1/NTNG1/PRND/THY1/CA4/FOLR1/RHBG/TEX101 12

GO:0031983 CC vesicle lumen 40/1182 335/17056 0.00053444 0.005344402  
0.004251721  
A2M/ACTN2/APOE/BPI/CRISPLD2/CTSG/ELANE/F13A1/FCN1/FN1/GRP/IGF1/ISLR/MMRN1/  
MPO/PCSK1/PENK/RETN/SERPINA3/SERPINE1/SERPING1/SPARC/TGFB3/THBS1/TIMP2/TIMP3/AP  
OA1/APOH/DEFA1/FGA/FGB/FGG/HRG/LCN2/OLFM4/ORM1/ORM2/S100A7/TTR/ZG16 40

GO:0034358 CC plasma lipoprotein particle 9/1182 36/170560.000609888 0.005872997  
0.004672243 APOE/APOA1/APOA2/APOA4/APOA5/APOC3/APOH/SAA2/SAA4 9

GO:1990777 CC lipoprotein particle 9/1182 36/170560.000609888 0.005872997  
0.004672243 APOE/APOA1/APOA2/APOA4/APOA5/APOC3/APOH/SAA2/SAA4 9

GO:0034774 CC secretory granule lumen 38/1182 317/17056 0.000674493 0.006377023  
0.005073219  
A2M/ACTN2/BPI/CRISPLD2/CTSG/ELANE/F13A1/FCN1/FN1/GRP/IGF1/ISLR/MMRN1/MPO/P  
CSK1/PENK/RETN/SERPINA3/SERPINE1/SERPING1/SPARC/TGFB3/THBS1/TIMP2/TIMP3/APOA1/A  
POH/DEFA1/FGA/FGB/FGG/HRG/LCN2/OLFM4/ORM1/ORM2/S100A7/TTR 38

GO:0008076 CC voltage-gated potassium channel complex 15/1182 86/170560.000770838  
0.00715778 0.005694347  
DPP6/KCNA1/KCNA2/KCNA4/KCNA5/KCNB1/KCNE4/KCNIP1/KCNJ5/KCNK2/KCNMA1/KCNMB  
1/KCNQ5/LRRC38/KCNV1 15

GO:0005614 CC interstitial matrix 5/1182 12/170560.000831494 0.007585556  
0.006034663 ABI3BP/CCDC80/SMOC2/TNC/VIT 5

GO:0032994 CC protein-lipid complex 9/1182 38/170560.000931691 0.008345006  
0.006638841 APOE/APOA1/APOA2/APOA4/APOA5/APOC3/APOH/SAA2/SAA4 9

GO:0150034 CC distal axon 34/1182 279/17056 0.000946837 0.008345006  
0.006638841  
ADCYAP1/BOC/CHRM2/CNR1/CRTAC1/DPYSL3/GAP43/GPM6A/GRIK3/GRIK5/KCNA1/KCNA2  
/KCNK2/LAMP5/LRRTM1/NEFL/NTRK2/PALLD/PCDH9/PENK/PNOC/PRKCB/PTPRN/SLC18A3/STM  
N2/STMN4/SYT11/THY1/TIMP2/TNN/IGF2BP1/NPFF/P2RX3/REG1A 34

GO:0034702 CC ion channel complex 35/1182 294/17056 0.001216656 0.010373915  
0.008252932  
ABCC9/CACNA1G/CACNG7/CASQ2/CHRNA3/CHRNA6/DPP6/GABRA5/GRIA1/GRIK3/GRIK5/H  
TR3A/KCNA1/KCNA2/KCNA4/KCNA5/KCNB1/KCNE4/KCNIP1/KCNJ5/KCNK2/KCNK4/KCNMA1/KCN  
MB1/KCNQ5/LRRC18/LRRC38/NLGN1/SCN11A/SCN2B/SCN7A/SHANK1/SHISA8/GABRA4/KCNV1  
35

GO:0098839 CC postsynaptic density membrane 13/1182 72/170560.00121694  
0.010373915 0.008252932  
ACTN2/ATP2B2/CACNG7/CNKSR2/EPHA7/GRIA1/GRIK5/LRFN5/LRRC4C/NETO1/PTPRS/SLITR  
K3/SORCS3 13

GO:0031362 CC anchored component of external side of plasma membrane 6/1182  
19/170560.001353724 0.011173591 0.008889112  
FOLR2/GPIHBP1/PRND/THY1/CA4/FOLR1 6

GO:0043034 CC costamere 6/1182 19/170560.001353724 0.011173591 0.008889112

AHNAK2/ANK2/FLNC/PGM5/SMPX/SYNM 6

GO:0032590 CC dendrite membrane 9/1182 40/170560.001379117 0.011205329  
0.008914361 GABRA5/GRIA1/KCNB1/LAMP5/SHISA8/THY1/DDN/GABRA4/REG1A 9

GO:0099061 CC integral component of postsynaptic density membrane 10/1182  
48/170560.00142579 0.011406318 0.009074257  
CACNG7/EPHA7/GRIA1/GRIK5/LRFN5/LRRC4C/NETO1/PTPRS/SLITRK3/SORCS3 10

GO:0043204 CC perikaryon 19/1182 132/17056 0.001870943 0.014740765  
0.011726965  
ADCYAP1/ASTN1/CCR2/CNGA3/CRYAB/GRIK3/GRIK5/KCNA1/KCNA2/KCNB1/NDN/NGB/PEN  
K/PTPRN/PTPRS/VIP/DDN/EFNA2/NPFF19

GO:0032809 CC neuronal cell body membrane 7/1182 27/170560.001957303  
0.015191005 0.012085152 CD22/GABRA5/KCNA2/KCNB1/SLC6A2/THY1/REG1A 7

GO:0044853 CC plasma membrane raft 16/1182 104/17056 0.002080559 0.015910161  
0.012657273  
ADCYAP1R1/ADD2/ATP1A2/BVES/CDH2/CHRNA3/EHD2/HTR2A/ITGB2/KCNA5/KCNMA1/MS  
4A1/P2RY12/PTGIS/ADTRP/MYO1A 16

GO:0043198 CC dendritic shaft 8/1182 35/170560.002268346 0.017073328 0.013582627  
FLNA/HTR2A/JPH4/KIRREL3/MAP1A/NLGN1/SLC8A1/SYNDIG1 8

GO:0099146 CC intrinsic component of postsynaptic density membrane 10/1182  
51/170560.002306106 0.017073328 0.013582627  
CACNG7/EPHA7/GRIA1/GRIK5/LRFN5/LRRC4C/NETO1/PTPRS/SLITRK3/SORCS3 10

GO:0098793 CC presynapse 50/1182 478/17056 0.002331166 0.017073328  
0.013582627  
ADCYAP1/ATP2B2/CADM3/CDH10/CDH2/CHAT/CHRM2/CHRNA6/CNR1/CNTN1/FXYD6/GAB  
RA5/GPM6A/GRIA1/GRIK3/GRIK5/HTR2A/HTR3A/IL31RA/KCNA1/KCNA2/KCNK2/KCTD8/LAMP5/  
NEFL/NGF/NLGN1/NRXN2/NTNG1/NTRK2/PENK/PNOC/PRKCB/PTPRN/PTPRS/SLC18A3/SLC6A17/  
SLC6A2/SNAP91/SV2B/SYNDIG1/SYT11/SYT4/SYT6/TNN/CEL/DDC/NPFF/P2RX3/SYNGR4 50

GO:0043679 CC axon terminus 17/1182 117/17056 0.002862986 0.020677119  
0.016449611  
ADCYAP1/CHRM2/GRIK3/GRIK5/KCNA1/KCNA2/KCNK2/NTRK2/PENK/PNOC/PRKCB/PTPRN/S  
LC18A3/SYT11/TNN/NPFF/P2RX3 17

GO:0042611 CC MHC protein complex 6/1182 22/170560.003111906 0.022167001  
0.017634882 HLA-DOA/HLA-DPA1/HLA-DPB1/HLA-DQA1/HLA-DQA2/HLA-DQB2 6

GO:0001527 CC microfibril 4/1182 10/170560.00343486 0.024136851 0.019201989  
FBN1/LTBP1/MFAP4/MFAP5 4

GO:0032589 CC neuron projection membrane 10/1182 56/170560.004696061 0.032559358  
0.025902485 GABRA5/GRIA1/KCNB1/LAMP5/SHISA8/THY1/ADGRV1/DDN/GABRA4/REG1A  
10

GO:0031233 CC intrinsic component of external side of plasma membrane 6/1182  
24/170560.004983768 0.034099468 0.027127714  
FOLR2/GPIHBP1/PRND/THY1/CA4/FOLR1 6

GO:0005775 CC vacuolar lumen 21/1182 167/17056 0.005786501 0.038576671  
0.030689538  
BGN/BPI/CTSG/DCN/ELANE/KERA/LUM/MPO/OGN/OMD/PDGFRB/PRELP/RETN/SDC3/SERPI

NA3/VCAN/DEFA1/ORM2/S100A7/SERPINB13/TTR 21  
 GO:0043197 CC dendritic spine 21/1182 167/17056 0.005786501 0.038576671  
 0.030689538  
 ACTN2/ATP1A2/CAMK2A/CRYAB/FCGR2B/GPM6A/GRIA1/KCNA4/LAMA2/NLGN1/NTRK2/PS  
 D/SHANK1/SHISA8/SLC8A1/SYNDIG1/SYT11/DDN/IGF2BP1/P2RX3/PPP1R1B 21  
 GO:0044291 CC cell-cell contact zone 11/1182 67/170560.006010327 0.039561643  
 0.031473129  
 ANK2/ATP1A2/CDH2/CTNNA3/DES/JAM3/KCNA5/PCDH9/PECAM1/PGM5/SLC8A1 11  
 GO:0098945 CC intrinsic component of presynaptic active zone membrane 5/1182  
 18/170560.006343671 0.041233864 0.032803458 CDH10/CDH2/GPM6A/NTNG1/SYT11  
 5  
 GO:0044309 CC neuron spine 21/1182 169/17056 0.006625331 0.042532987  
 0.033836971  
 ACTN2/ATP1A2/CAMK2A/CRYAB/FCGR2B/GPM6A/GRIA1/KCNA4/LAMA2/NLGN1/NTRK2/PS  
 D/SHANK1/SHISA8/SLC8A1/SYNDIG1/SYT11/DDN/IGF2BP1/P2RX3/PPP1R1B 21  
 GO:0060076 CC excitatory synapse 9/1182 50/170560.00678523 0.04302829  
 0.034231008 CADM3/CBLN1/IGSF11/LRRTM1/NETO1/NLGN1/SHANK1/SYNDIG1/SYT119  
 GO:0045177 CC apical part of cell 39/1182 374/17056 0.006988416 0.043782849  
 0.034831295  
 ANK2/CD300LG/CDH2/CPO/DDR2/FN1/GPIHBP1/KCNA1/KCNA5/KCNE4/KCNK2/KCNMA1/P2  
 RX2/PDGFBRB/SLC12A3/THY1/TLR9/VCAM1/ABCC2/CA4/CEACAM20/CLCA4/CYP4F2/DSG1/DUOX  
 2/DUOXA2/FABP1/FOLR1/KISS1/MUC17/MYO1A/PDZD3/REEP6/REN/RHCG/SI/SLC17A4/SLC26A3  
 /SLC34A3 39  
 GO:0032009 CC early phagosome 4/1182 12/170560.007239868 0.044818233  
 0.035654991 RAB31/SYT11/TLR7/TLR9 4  
 GO:0030669 CC clathrin-coated endocytic vesicle membrane 8/1182 42/170560.007401247  
 0.045278217 0.03602093  
 APOE/HLA-DPA1/HLA-DPB1/HLA-DQA1/HLA-DQA2/HLA-DQB2/ROR2/SLC18A3 8  
 GO:0098982 CC GABA-ergic synapse 11/1182 69/170560.007521393 0.04547819  
 0.036180018  
 ATP2B2/CDH10/CNR1/GABRA5/GAP43/LRFN5/LRRTM1/SLC6A17/SLITRK2/SLITRK3/GABRA4  
 11  
 GO:0030315 CC T-tubule 9/1182 51/170560.007745043 0.046292208 0.036827607  
 AHNAK2/ANK2/ATP1A2/CACNG7/CASQ1/KCNJ5/SLC8A1/STAC/TGFB3 9  
 GO:0016528 CC sarcoplasm 12/1182 79/170560.007927934 0.046846881 0.037268875  
 CASQ1/CASQ2/FLNC/JPH2/JPH4/MRVI1/PLN/SGCD/SPOCK1/THBS1/THBS4/XDH 12  
 GO:0045121 CC membrane raft 33/1182 307/17056 0.008050223 0.047035008  
 0.037418539  
 ADCY2/ADCYAP1R1/ADD2/ANK2/ATP1A2/BVES/CDH2/CHRNA3/CLIP3/CNR1/CNTN1/EHD2/H  
 TR2A/ITGB2/KCNA5/KCNMA1/MAG/MS4A1/P2RY12/PECAM1/PTGIS/PTPRC/SLC6A2/SORBS1/SU  
 LF1/THY1/TNR/TUBA1A/ADTRP/MYO1A/P2RX3/STOML3/TEX101 33  
 GO:0098857 CC membrane microdomain 33/1182 308/17056 0.008436442  
 0.048743884 0.038778029  
 ADCY2/ADCYAP1R1/ADD2/ANK2/ATP1A2/BVES/CDH2/CHRNA3/CLIP3/CNR1/CNTN1/EHD2/H

TR2A/ITGB2/KCNA5/KCNMA1/MAG/MS4A1/P2RY12/PECAM1/PTGIS/PTPRC/SLC6A2/SORBS1/SU  
 LF1/THY1/TNR/TUBA1A/ADTRP/MYO1A/P2RX3/STOML3/TEX101 33  
 GO:0016324 CC apical plasma membrane 33/1182 311/17056 0.009688129  
 0.055360739 0.044042045  
 ANK2/CD300LG/CDH2/CPO/DDR2/FN1/GPIHBP1/KCNA1/KCNA5/KCNE4/KCNK2/KCNMA1/P2  
 RX2/PDGFRB/SLC12A3/THY1/TLR9/ABCC2/CA4/CEACAM20/CLCA4/CYP4F2/DSG1/DUOX2/FOLR1  
 /KISS1/MUC17/MYO1A/RHCG/SLC17A4/SLC26A3/SLC34A3 33  
 GO:0036019 CC endolysosome 5/1182 20/170560.010227203 0.057805933 0.045987311  
 TLR7/TLR8/TLR9/HRG/PCSK9 5  
 GO:0098685 CC Schaffer collateral - CA1 synapse 12/1182 82/170560.010611226  
 0.059331586 0.047201039  
 AKAP12/CAMK2A/CDH11/EPHA7/LRRC4C/NEFL/NTNG1/PTPRS/SHANK1/SYT11/TNR/P2RX3  
 12  
 GO:0099572 CC postsynaptic specialization 35/1182 341/17056 0.01282716  
 0.070224974 0.055867236  
 ACTN2/ADD2/ATP2B2/CACNG7/CAMK2A/CDH10/CDH2/CHRNA3/CNKSR2/CPEB1/CRYAB/DC  
 LK1/EPHA7/GABRA5/GAP43/GRIA1/GRIK5/IGSF11/LRFN5/LRRC4C/LRRTM1/NETO1/NLGN1/NTRK  
 2/PSD/PTPRS/SHANK1/SHISA8/SLITRK3/SORCS2/SORCS3/SPOCK1/SYNDIG1/SYT11/GABRA4 35  
 GO:0036020 CC endolysosome membrane 4/1182 14/170560.013099659 0.070224974  
 0.055867236 TLR7/TLR8/TLR9/PCSK9 4  
 GO:0043083 CC synaptic cleft 4/1182 14/170560.013099659 0.070224974 0.055867236  
 ADGRB3/APOE/CBLN1/LAMA2 4  
 GO:0099059 CC integral component of presynaptic active zone membrane 4/1182  
 14/170560.013099659 0.070224974 0.055867236 CDH10/CDH2/GPM6A/SYT11 4  
 GO:0001533 CC cornified envelope 10/1182 65/170560.01346975 0.071472141  
 0.056859416 FLG/KRT1/DSG1/DSG4/PI3/SPRR2A/SPRR2D/SPRR2E/SPRR2F/SPRR2G 10  
 GO:0098589 CC membrane region 33/1182 320/17056 0.014387703 0.075571774  
 0.060120864  
 ADCY2/ADCYAP1R1/ADD2/ANK2/ATP1A2/BVES/CDH2/CHRNA3/CLIP3/CNR1/CNTN1/EHD2/H  
 TR2A/ITGB2/KCNA5/KCNMA1/MAG/MS4A1/P2RY12/PECAM1/PTGIS/PTPRC/SLC6A2/SORBS1/SU  
 LF1/THY1/TNR/TUBA1A/ADTRP/MYO1A/P2RX3/STOML3/TEX101 33  
 GO:0090533 CC cation-transporting ATPase complex 4/1182 15/170560.016900906  
 0.087884713 0.069916381 ATP1A2/ATP1A4/PLN/FXYD4 4  
 GO:0044304 CC main axon 10/1182 68/170560.018163734 0.093516253 0.074396533  
 ANK2/CNGA3/KCNA1/KCNA2/MAG/MAP1A/MYOC/NFASC/SPOCK1/THY1 10  
 GO:0034706 CC sodium channel complex 5/1182 23/170560.018683753 0.095250506  
 0.075776212 GRIK3/GRIK5/SCN11A/SCN2B/SCN7A 5  
 GO:0014704 CC intercalated disc 8/1182 50/170560.02068861 0.10444735  
 0.08309273 ANK2/ATP1A2/CDH2/CTNNA3/DES/KCNA5/PGM5/SLC8A1 8  
 GO:0098984 CC neuron to neuron synapse 34/1182 342/17056 0.021555892  
 0.10777946 0.085743579  
 ACTN2/ADD2/ATP2B2/CACNG7/CAMK2A/CDH2/CHRM2/CHRNA3/CNKSR2/CPEB1/CRYAB/D  
 CLK1/EPHA7/GAP43/GRIA1/GRIK5/IGSF11/LRFN5/LRRC4C/NETO1/NLGN1/NTRK2/PENK/PSD/PTP  
 RS/SHANK1/SHISA8/SLITRK3/SORCS2/SORCS3/SPOCK1/SYNDIG1/SYT11/P2RX334

GO:0016529 CC sarcoplasmic reticulum 10/1182 70/170560.021898757 0.108450986  
 0.086277809 CASQ1/CASQ2/JPH2/JPH4/MRVI1/PLN/SGCD/THBS1/THBS4/XDH 10  
 GO:0097386 CC glial cell projection 5/1182 24/170560.022289012 0.109342324  
 0.086986909 CNGA3/KCNK2/NFASC/SCN7A/SYT4 5  
 GO:0043195 CC terminal bouton 8/1182 51/170560.023096715 0.112245719  
 0.089296695 ADCYAP1/GRIK3/GRIK5/NTRK2/SLC18A3/SYT11/TNN/P2RX3 8  
 GO:0032279 CC asymmetric synapse 32/1182 322/17056 0.025299509 0.121812453  
 0.096907478  
 ACTN2/ADD2/ATP2B2/CACNG7/CAMK2A/CDH2/CHRM2/CHRNA3/CNKSR2/CPEB1/CRYAB/D  
 CLK1/EPHA7/GAP43/GRIA1/GRIK5/IGSF11/LRFN5/LRRC4C/NETO1/NLGN1/NTRK2/PSD/PTPRS/SH  
 ANK1/SHISA8/SLITRK3/SORCS2/SORCS3/SPOCK1/SYNDIG1/SYT11 32  
 GO:0098878 CC neurotransmitter receptor complex 8/1182 52/170560.025695227  
 0.122582735 0.097520273 CACNG7/GRIA1/GRIK3/GRIK5/HTR3A/NLGN1/SHANK1/SHISA8  
 8  
 GO:0031092 CC platelet alpha granule membrane 4/1182 17/170560.026391476  
 0.124759705 0.099252154 PCDH7/PECAM1/SELP/SPARC 4  
 GO:0005916 CC fascia adherens 3/1182 10/170560.027563609 0.129126817  
 0.102726395 CDH2/CTNNA3/DES 3  
 GO:0071556 CC integral component of lumenal side of endoplasmic reticulum membrane  
 5/1182 26/170560.030779464 0.141640012 0.112681224  
 HLA-DPA1/HLA-DPB1/HLA-DQA1/HLA-DQA2/HLA-DQB2 5  
 GO:0098553 CC lumenal side of endoplasmic reticulum membrane 5/1182 26/17056  
 0.030779464 0.141640012 0.112681224  
 HLA-DPA1/HLA-DPB1/HLA-DQA1/HLA-DQA2/HLA-DQB2 5  
 GO:0005859 CC muscle myosin complex 4/1182 18/170560.03211942 0.146509636  
 0.116555237 MYH11/MYL3/MYL9/MYH4 4  
 GO:0005901 CC caveola 10/1182 75/170560.033621903 0.152029476 0.120946526  
 ADCYAP1R1/ATP1A2/BVES/EHD2/HTR2A/KCNA5/KCNMA1/P2RY12/PTGIS/ADTRP 10  
 GO:0014069 CC postsynaptic density 31/1182 318/17056 0.034352573 0.153994294  
 0.12250963  
 ACTN2/ADD2/ATP2B2/CACNG7/CAMK2A/CDH2/CHRNA3/CNKSR2/CPEB1/CRYAB/DCLK1/EP  
 HA7/GAP43/GRIA1/GRIK5/IGSF11/LRFN5/LRRC4C/NETO1/NLGN1/NTRK2/PSD/PTPRS/SHANK1/S  
 HISA8/SLITRK3/SORCS2/SORCS3/SPOCK1/SYNDIG1/SYT11 31  
 GO:0043209 CC myelin sheath 7/1182 46/170560.037687596 0.167500429 0.13325439  
 GNAO1/JAM3/MAG/PLP1/PMP2/TUBA1A/GJC3 7  
 GO:0016010 CC dystrophin-associated glycoprotein complex 4/1182 19/170560.03851772  
 0.168312727 0.133900611 PGM5/SGCD/SGCG/SNTG2 4  
 GO:0090665 CC glycoprotein complex 4/1182 19/170560.03851772 0.168312727  
 0.133900611 PGM5/SGCD/SGCG/SNTG2 4  
 GO:0032432 CC actin filament bundle 9/1182 67/170560.040829608 0.176928303  
 0.140754703 CRYAB/FERMT2/LDB3/MYL9/MYLK/PDLIM3/PGM5/SORBS1/SYNPO2 9  
 GO:0031253 CC cell projection membrane 32/1182 337/17056 0.043498148  
 0.186934191 0.148714853  
 ANTXR1/BVES/CYBRD1/CYS1/EVC/EVC2/FERMT2/GABRA5/GAP43/GRIA1/KCNA2/KCNB1/LA

MP5/P2RY12/PLEKHO1/PSD/SCIMP/SHISA8/THY1/ABCC2/ADGRV1/CA4/CEACAM20/DDN/FOLR1/  
GABRA4/GNGT1/NOX1/PLA2G4F/REG1A/SLC26A3/SLC34A3 32

GO:0005890 CC sodium:potassium-exchanging ATPase complex 3/1182 12/17056  
0.045568122 0.189655853 0.150880061 ATP1A2/ATP1A4/FXYD4 3

GO:0033270 CC paranode region of axon 3/1182 12/170560.045568122 0.189655853  
0.150880061 KCNA1/MAG/NFASC 3

GO:0043194 CC axon initial segment 4/1182 20/170560.045590349 0.189655853  
0.150880061 ANK2/CNGA3/MAP1A/NFASC4

GO:0071682 CC endocytic vesicle lumen 4/1182 20/170560.045590349 0.189655853  
0.150880061 APOE/MPO/SPARC/APOA1 4

GO:0016342 CC catenin complex 5/1182 29/170560.046882225 0.191958715  
0.152712095 CDH10/CDH11/CDH19/CDH2/CDH17 5

GO:0048787 CC presynaptic active zone membrane 5/1182 29/170560.046882225  
0.191958715 0.152712095 CDH10/CDH2/GPM6A/NTNG1/SYT11 5

GO:0043202 CC lysosomal lumen 11/1182 92/170560.052951133 0.214996739  
0.171039916 BGN/DCN/KERA/LUM/OGN/OMD/PDGFRB/PRELP/SDC3/VCAN/SERPINB13  
11

GO:0098533 CC ATPase dependent transmembrane transport complex 4/1182 21/17056  
0.05333573 0.214996739 0.171039916 ATP1A2/ATP1A4/PLN/FXYD4 4

GO:0008328 CC ionotropic glutamate receptor complex 7/1182 50/170560.055541582  
0.221674438 0.176352336 CACNG7/GRIA1/GRIK3/GRIK5/NLGN1/SHANK1/SHISA8 7

GO:0032591 CC dendritic spine membrane 3/1182 13/170560.056271203 0.221674438  
0.176352336 GRIA1/SHISA8/DDN 3

GO:0043020 CC NADPH oxidase complex 3/1182 13/170560.056271203 0.221674438  
0.176352336 CYBB/DUOX2/NOX1 3

GO:0045334 CC clathrin-coated endocytic vesicle 8/1182 61/170560.058581118  
0.229038956 0.182211153  
APOE/HLA-DPA1/HLA-DPB1/HLA-DQA1/HLA-DQA2/HLA-DQB2/ROR2/SLC18A3 8

GO:0008305 CC integrin complex 5/1182 31/170560.059932834 0.232575175  
0.18502438 EMILIN1/ITGA11/ITGAD/ITGB2/ITGBL1 5

GO:0016460 CC myosin II complex 4/1182 22/170560.061747132 0.234368677  
0.186451195 MYH11/MYL3/MYL9/MYH4 4

GO:0097038 CC perinuclear endoplasmic reticulum 4/1182 22/170560.061747132  
0.234368677 0.186451195 CYBB/SYT6/MOGAT2/MOGAT3 4

GO:0097225 CC sperm midpiece 4/1182 22/170560.061747132 0.234368677  
0.186451195 TACR1/TACR2/DEFB1/SLC26A3 4

GO:0001725 CC stress fiber 8/1182 62/170560.063368285 0.235367915 0.187246135  
FERMT2/LDB3/MYL9/MYLK/PDLIM3/PGM5/SORBS1/SYNPO2 8

GO:0035580 CC specific granule lumen 8/1182 62/170560.063368285 0.235367915  
0.187246135 BPI/ELANE/RETN/TIMP2/LCN2/OLFM4/ORM1/ORM2 8

GO:0097517 CC contractile actin filament bundle 8/1182 62/170560.063368285  
0.235367915 0.187246135 FERMT2/LDB3/MYL9/MYLK/PDLIM3/PGM5/SORBS1/SYNPO2  
8

GO:0001518 CC voltage-gated sodium channel complex 3/1182 14/170560.068045261

0.248540186 0.19772529 SCN11A/SCN2B/SCN7A 3  
 GO:0042588 CC zymogen granule 3/1182 14/170560.068045261 0.248540186  
 0.19772529 DMBT1/REG1A/ZG16 3  
 GO:0031256 CC leading edge membrane 17/1182 166/17056 0.068348551 0.248540186  
 0.19772529  
 ANTXR1/FERMT2/GABRA5/GRIA1/KCNA2/KCNB1/LAMP5/PLEKHO1/PSD/SCIMP/SHISA8/THY  
 1/ADGRV1/DDN/GABRA4/PLA2G4F/REG1A 17  
 GO:0042641 CC actomyosin 9/1182 74/170560.069124823 0.249617415 0.198582275  
 FERMT2/LDB3/LURAP1/MYL9/MYLK/PDLIM3/PGM5/SORBS1/SYNPO2 9  
 GO:0005882 CC intermediate filament 20/1182 203/17056 0.070775525 0.252211065  
 0.200645645  
 DES/FLG/KRT1/KRT222/LMNTD1/NEFL/SYNC/SYNN/VIM/KRT12/KRT13/KRT15/KRT20/KRT4  
 /KRT6B/KRT78/KRTAP3-1/KRTAP4-1/KRTAP5-4/KRTAP5-5 20  
 GO:0044305 CC calyx of Held 4/1182 23/170560.070813107 0.252211065 0.200645645  
 KCNA1/KCNA2/KCNK2/PRKCB4  
 GO:0030426 CC growth cone 17/1182 167/17056 0.071425089 0.25266018  
 0.201002937  
 BOC/CNR1/CRTAC1/DPYSL3/GAP43/GPM6A/LAMP5/LRRTM1/NEFL/PALLD/PCDH9/STMN2/S  
 TMN4/THY1/TIMP2/IGF2BP1/REG1A 17  
 GO:0031594 CC neuromuscular junction 9/1182 76/170560.079011148 0.277606737  
 0.220849084 DES/EPHA7/LAMA2/NEFL/SPOCK1/SYNC/TUBA1A/EFNA2/SYNGR4 9  
 GO:0000137 CC Golgi cis cisterna 4/1182 24/170560.080517926 0.280215346  
 0.222924354 GOLGA8H/GOLGA8M/GOLGA8O/GOLT1A 4  
 GO:0033268 CC node of Ranvier 3/1182 15/170560.08083135 0.280215346  
 0.222924354 MYOC/NFASC/SPOCK1 3  
 GO:0098636 CC protein complex involved in cell adhesion 5/1182 34/170560.082979929  
 0.285758696 0.227334347 EMILIN1/ITGA11/ITGAD/ITGB2/ITGBL1 5  
 GO:0019897 CC extrinsic component of plasma membrane 16/1182 159/17056  
 0.084967124 0.290049631 0.230747986  
 BLK/CDH10/CDH11/CDH19/CDH2/CNKS2/FCN1/FERMT2/GNAO1/KCNIP1/SNAP91/STAC/C  
 DH17/GNGT1/PCSK9/TGM3 16  
 GO:0005911 CC cell-cell junction 39/1182 449/17056 0.085341526 0.290049631  
 0.230747986  
 ADCYAP1R1/ANK2/ATP1A2/BVES/CADM3/CDH10/CDH11/CDH19/CDH2/CLMP/CTNNA3/DES  
 /FLNA/FLRT2/FRMD6/HEG1/HEPACAM/HMCN1/IGSF11/JAM3/KCNA2/KCNA5/LDB3/LIMS2/NFAS  
 C/PCDH9/PCDHGA12/PDLIM3/PECAM1/PGM5/SLC8A1/SORBS1/ABCC2/CDH17/CLDN9/DSG1/DS  
 G4/GJC3/PDZD3 39  
 GO:0005913 CC cell-cell adherens junction 12/1182 112/17056 0.087157647  
 0.293962359 0.233860743  
 CDH10/CDH11/CDH19/CDH2/CTNNA3/DES/HMCN1/LDB3/PDLIM3/PGM5/SORBS1/CDH17  
 12  
 GO:0035578 CC azurophil granule lumen 10/1182 89/170560.087801609 0.293962359  
 0.233860743 BPI/CTSG/ELANE/MPO/RETN/SERPINA3/DEFA1/ORM2/S100A7/TTR 10  
 GO:0030427 CC site of polarized growth 17/1182 172/17056 0.088188708 0.293962359

0.233860743  
 BOC/CNR1/CRTAC1/DPYSL3/GAP43/GPM6A/LAMP5/LRRTM1/NEFL/PALLD/PCDH9/STMN2/STMN4/THY1/TIMP2/IGF2BP1/REG1A 17  
 GO:0045111 CC intermediate filament cytoskeleton 22/1182 238/17056 0.102373928  
 0.339072882 0.269748265  
 ADCY5/DES/FLG/KRT1/KRT222/LMNTD1/NEFL/SYNC/SYNN/VIM/KRT12/KRT13/KRT15/KRT20/KRT4/KRT6B/KRT78/KRTAP3-1/KRTAP4-1/KRTAP5-4/KRTAP5-5/NR1I2 22  
 GO:0012507 CC ER to Golgi transport vesicle membrane 7/1182 58/170560.104780584  
 0.344847493 0.274342236  
 GRIA1/HLA-DPA1/HLA-DPB1/HLA-DQA1/HLA-DQA2/HLA-DQB2/FOLR1 7  
 GO:0036126 CC sperm flagellum 9/1182 82/170560.113547713 0.37135101  
 0.295427018 DCDC2C/NME8/TACR1/TACR2/AKAP4/DEFB1/LYZL4/PMFBBP1/SLC26A3 9  
 GO:0033017 CC sarcoplasmic reticulum membrane 5/1182 38/170560.119905563  
 0.387592279 0.308347704 CASQ1/CASQ2/JPH2/JPH4/PLN 5  
 GO:0005791 CC rough endoplasmic reticulum 9/1182 83/170560.120004533 0.387592279  
 0.308347704 ADCYAP1R1/CYBB/EPHA5/MYOC/PTGDS/CA4/P2RX3/PCSK9/SCGB1A1 9  
 GO:0005884 CC actin filament 11/1182 108/17056 0.127945901 0.410690548  
 0.326723452  
 ACTN2/DPYSL3/FLNA/GAS7/LDB3/LMOD1/PALLD/PDLIM3/TPM2/WIPF1/MYO1A 11  
 GO:0098802 CC plasma membrane receptor complex 17/1182 183/17056 0.133315894  
 0.423292797 0.336749128  
 CACNG7/CHRNA3/CHRNA6/EMILIN1/GRIA1/GRIK3/GRIK5/HTR3A/ITGA11/ITGAD/ITGB2/ITGBL1/NLGN1/SHANK1/SHISA8/SORBS1/TFR2 17  
 GO:0032588 CC trans-Golgi network membrane 9/1182 85/170560.133500036  
 0.423292797 0.336749128  
 CLIP3/CLVS2/HLA-DPA1/HLA-DPB1/HLA-DQA1/HLA-DQA2/HLA-DQB2/PLD4/RAB31 9  
 GO:0031045 CC dense core granule 3/1182 19/170560.140719911 0.443480932  
 0.352809729 PENK/SPX/SYT4 3  
 GO:0005924 CC cell-substrate adherens junction 34/1182 405/17056 0.141620342  
 0.443629988 0.35292831  
 ACTN2/AKAP12/ANXA6/ARHGAP31/CDH2/CNN1/DDR2/FERMT2/FHL1/FLNA/FLNC/FLRT2/ITGA11/ITGB2/ITGBL1/LAYN/LIMS2/MRC2/NFASC/PALLD/PDGFRB/PGM5/PTPRC/SCARF2/SMPX/SORBS1/SYNPO2/TGFB1I1/THY1/TNC/TNS1/VIM/S100A7/TM4SF20 34  
 GO:0097729 CC 9+2 motile cilium 9/1182 87/170560.147750669 0.453805875  
 0.361023702 DCDC2C/NME8/TACR1/TACR2/AKAP4/DEFB1/LYZL4/PMFBBP1/SLC26A3 9  
 GO:0030658 CC transport vesicle membrane 18/1182 199/17056 0.149005365  
 0.453805875 0.361023702  
 GRIA1/HLA-DPA1/HLA-DPB1/HLA-DQA1/HLA-DQA2/HLA-DQB2/LAMP5/PTPRN/PTPRS/SLC18A3/SLC6A17/SV2B/SYT11/SYT4/SYT6/CA4/FOLR1/SYNGR4 18  
 GO:0032280 CC symmetric synapse 2/1182 10/170560.149232317 0.453805875  
 0.361023702 CHRM2/PENK 2  
 GO:0044224 CC juxtaparanode region of axon 2/1182 10/170560.149232317 0.453805875  
 0.361023702 KCNA1/KCNA2 2  
 GO:0098981 CC cholinergic synapse 2/1182 10/170560.149232317 0.453805875

0.361023702 CHRM2/NEFL 2  
 GO:0030055 CC cell-substrate junction 34/1182 408/17056 0.15138686 0.457681205  
 0.364106708  
 ACTN2/AKAP12/ANXA6/ARHGAP31/CDH2/CNN1/DDR2/FERMT2/FHL1/FLNA/FLNC/FLRT2/ITGA11/ITGB2/ITGBL1/LAYN/LIMS2/MRC2/NFASC/PALLD/PDGFRB/PGM5/PTPRC/SCARF2/SMPX/SORBS1/SYNPO2/TGFB1I1/THY1/TNC/TNS1/VIM/S100A7/TM4SF20 34  
 GO:0042827 CC platelet dense granule 3/1182 20/170560.157507481 0.473432891  
 0.376637907 SELP/TIMP3/APOH 3  
 GO:0031526 CC brush border membrane6/1182 53/170560.158855273 0.474739896  
 0.377677691 CYBRD1/ABCC2/CA4/FOLR1/SLC26A3/SLC34A3 6  
 GO:0030175 CC filopodium 10/1182 101/17056 0.161411814 0.479623676  
 0.381562965  
 ACTA2/ACTG2/ACTN2/ADGRA2/ANTXR1/GAP43/GPM6A/NLGN1/VCAM1/IGF2BP1 10  
 GO:0031941 CC filamentous actin 4/1182 31/170560.164325322 0.482763659  
 0.384060968 DPYSL3/LDB3/PDLIM3/MYO1A 4  
 GO:0097546 CC ciliary base 4/1182 31/170560.164325322 0.482763659 0.384060968  
 ARMC4/GLI2/GLI3/FAM183A 4  
 GO:0002116 CC semaphorin receptor complex 2/1182 11/170560.174398152  
 0.487564725 0.387880439 NRP2/PLXNA4 2  
 GO:0017146 CC NMDA selective glutamate receptor complex 2/1182 11/17056  
 0.174398152 0.487564725 0.387880439 NLGN1/SHANK1 2  
 GO:0034992 CC microtubule organizing center attachment site 2/1182 11/17056  
 0.174398152 0.487564725 0.387880439 SYNE1/SUN3 2  
 GO:0034993 CC meiotic nuclear membrane microtubule tethering complex 2/1182  
 11/170560.174398152 0.487564725 0.387880439 SYNE1/SUN3 2  
 GO:0042589 CC zymogen granule membrane 2/1182 11/170560.174398152 0.487564725  
 0.387880439 DMBT1/ZG16 2  
 GO:0043220 CC Schmidt-Lanterman incisure 2/1182 11/170560.174398152 0.487564725  
 0.387880439 JAM3/MAG 2  
 GO:0061827 CC sperm head 2/1182 11/170560.174398152 0.487564725 0.387880439  
 TACR1/TACR2 2  
 GO:0106083 CC nuclear membrane protein complex 2/1182 11/170560.174398152  
 0.487564725 0.387880439 SYNE1/SUN3 2  
 GO:0106094 CC nuclear membrane microtubule tethering complex 2/1182 11/17056  
 0.174398152 0.487564725 0.387880439 SYNE1/SUN3 2  
 GO:0005925 CC focal adhesion 33/1182 402/17056 0.176919422 0.491968447  
 0.391383805  
 ACTN2/AKAP12/ANXA6/ARHGAP31/CDH2/CNN1/DDR2/FERMT2/FHL1/FLNA/FLNC/FLRT2/ITGA11/ITGB2/ITGBL1/LAYN/LIMS2/MRC2/NFASC/PALLD/PDGFRB/PGM5/PTPRC/SCARF2/SORBS1/SYNPO2/TGFB1I1/THY1/TNC/TNS1/VIM/S100A7/TM4SF20 33  
 GO:0019898 CC extrinsic component of membrane 24/1182 284/17056 0.182225442  
 0.504027817 0.400977595  
 BLK/CDH10/CDH11/CDH19/CDH2/CNKSR2/EHD2/FCN1/FERMT2/GFRA1/GFRA2/GNAO1/KCNIP1/PSD/SNAP91/SOX10/STAC/SYT6/CDH17/DEFB1/DMBT1/GNGT1/PCSK9/TGM3 24

GO:0031258 CC lamellipodium membrane 3/1182 22/170560.192730856 0.527473923  
 0.419630064 ANTXR1/FERMT2/KCNA2 3  
 GO:0032982 CC myosin filament 3/1182 22/170560.192730856 0.527473923  
 0.419630064 ACTG2/MYH11/MYH4 3  
 GO:0045095 CC keratin filament 9/1182 93/170560.194712181 0.530106462  
 0.421724372 KRT1/KRT13/KRT4/KRT6B/KRT78/KRTAP3-1/KRTAP4-1/KRTAP5-4/KRTAP5-5  
 9  
 GO:0097449 CC astrocyte projection 2/1182 12/170560.200164158 0.539302394  
 0.429040163 KCNK2/SYT4 2  
 GO:0099144 CC anchored component of synaptic membrane 2/1182 12/17056  
 0.200164158 0.539302394 0.429040163 CNTN1/NTNG1 2  
 GO:0031252 CC cell leading edge 32/1182 395/17056 0.201523183 0.540165233  
 0.429726592  
 ACTA2/ACTG2/ANTXR1/ARHGAP31/CDH2/CTNNA3/DPYSL3/FERMT2/GABRA5/GRIA1/KCNA2  
 /KCNB1/LAMP5/LAYN/MYLK/PALLD/PLEKHO1/PSD/SCIMP/SHISA8/STMN2/THY1/VIM/WIPF1/AD  
 GRV1/DDN/DUOX2/DUOX2/GABRA4/IGF2BP1/PLA2G4F/REG1A 32  
 GO:0030285 CC integral component of synaptic vesicle membrane 4/1182 34/17056  
 0.207061969 0.552165251 0.439273166 PTPRS/SLC6A17/SYT11/SYT4 4  
 GO:0005769 CC early endosome 27/1182 331/17056 0.214583888 0.569304194  
 0.452907992  
 ACKR1/ANK2/AOC3/APOE/CACNG7/CD22/CLIP3/CLVS2/DKK1/EPHA3/GPNMB/GRIA1/LAMP  
 5/MAGEL2/NTRK2/RAB31/SORCS2/ST8SIA2/SYNDIG1/VCAM1/APOA1/APOA2/APOA4/APOC3/NO  
 X1/PCSK9/SLC30A10 27  
 GO:0031089 CC platelet dense granule lumen 2/1182 13/170560.226326513 0.591405964  
 0.470490979 TIMP3/APOH 2  
 GO:0034362 CC low-density lipoprotein particle 2/1182 13/170560.226326513  
 0.591405964 0.470490979 APOE/APOA1 2  
 GO:0099243 CC extrinsic component of synaptic membrane 2/1182 13/170560.226326513  
 0.591405964 0.470490979 CNKSR2/SNAP91 2  
 GO:0030666 CC endocytic vesicle membrane 14/1182 162/17056 0.233001482  
 0.605803854 0.481945171  
 APOE/CAMK2A/COLEC12/CYBB/GRIA1/HLA-DPA1/HLA-DPB1/HLA-DQA1/HLA-DQA2/HLA-DQ  
 B2/RAB31/ROR2/SLC18A3/DMBT1 14  
 GO:0098858 CC actin-based cell projection 17/1182 202/17056 0.236541995  
 0.611949439 0.48683427  
 ACTA2/ACTG2/ACTN2/ADGRA2/ANTXR1/AOC3/FMN2/GAP43/GPM6A/NFASC/NLGN1/PVALB  
 /VCAM1/ADGRV1/CEACAM20/IGF2BP1/MYO1A 17  
 GO:0005903 CC brush border 9/1182 98/170560.238064709 0.612839846 0.487542631  
 CYBRD1/ABCC2/CA4/FOLR1/MYO1A/PDZD3/SI/SLC26A3/SLC34A3 9  
 GO:0030133 CC transport vesicle 30/1182 378/17056 0.244456695 0.619846676  
 0.49311689  
 BGN/CRISPLD2/DPYSL3/GRIA1/HLA-DPA1/HLA-DPB1/HLA-DQA1/HLA-DQA2/HLA-DQB2/IGF1  
 /LAMP5/NGF/NPTX1/PCSK1/PENK/PTPRN/PTPRS/SLC18A3/SLC6A17/SNAP91/SPX/SV2B/SYT11/S  
 YT4/SYT6/CA4/DDC/FOLR1/SFTA2/SYNGR4 30

GO:0030139 CC endocytic vesicle 24/1182 297/17056 0.245065587 0.619846676  
0.49311689  
APOE/CAMK2A/COLEC12/CYBB/ELANE/GRIA1/HLA-DPA1/HLA-DPB1/HLA-DQA1/HLA-DQA2/  
HLA-DQB2/MPEG1/MPO/PLD4/RAB31/ROR2/SLC18A3/SPARC/SYT11/TLR7/TLR9/VIM/APOA1/D  
MBT1 24

GO:0030665 CC clathrin-coated vesicle membrane 10/1182 112/17056 0.248281063  
0.619846676 0.49311689  
APOE/CHRM2/HLA-DPA1/HLA-DPB1/HLA-DQA1/HLA-DQA2/HLA-DQB2/ROR2/SLC18A3/REE  
P6 10

GO:0030057 CC desmosome 3/1182 25/170560.248591382 0.619846676 0.49311689  
JAM3/DSG1/DSG4 3

GO:0005639 CC integral component of nuclear inner membrane 2/1182 14/17056  
0.252706722 0.619846676 0.49311689 P2RX2/P2RX3 2

GO:0031229 CC intrinsic component of nuclear inner membrane 2/1182 14/17056  
0.252706722 0.619846676 0.49311689 P2RX2/P2RX3 2

GO:0033162 CC melanosome membrane 2/1182 14/170560.252706722 0.619846676  
0.49311689 GPNMB/SLC45A2 2

GO:0043218 CC compact myelin 2/1182 14/170560.252706722 0.619846676  
0.49311689 JAM3/MAG 2

GO:0045009 CC chitosome 2/1182 14/170560.252706722 0.619846676 0.49311689  
GPNMB/SLC45A2 2

GO:0090741 CC pigment granule membrane 2/1182 14/170560.252706722 0.619846676  
0.49311689 GPNMB/SLC45A2 2

GO:0030134 CC COPII-coated ER to Golgi transport vesicle 8/1182 88/170560.26465739  
0.646111937 0.514012128  
GRIA1/HLA-DPA1/HLA-DPB1/HLA-DQA1/HLA-DQA2/HLA-DQB2/FOLR1/PCSK9 8

GO:0044453 CC nuclear membrane part 2/1182 15/170560.279149087 0.678306192  
0.539624156 P2RX2/P2RX3 2

GO:0045335 CC phagocytic vesicle 11/1182 129/17056 0.281768702 0.679527076  
0.540595427 CYBB/ELANE/MPEG1/MPO/PLD4/RAB31/SYT11/TLR7/TLR9/VIM/DMBT1 11

GO:0016459 CC myosin complex 6/1182 64/170560.282265093 0.679527076  
0.540595427 ACTG2/MYH11/MYL3/MYL9/MYH4/MYO1A 6

GO:0031672 CC A band 4/1182 39/170560.283914732 0.680348667 0.541249041  
ANK2/CRYAB/MYL3/SMPX 4

GO:0032281 CC AMPA glutamate receptor complex 3/1182 27/170560.287054165  
0.684716357 0.544723742 CACNG7/GRIA1/SHISA8 3

GO:0098688 CC parallel fiber to Purkinje cell synapse 2/1182 16/170560.305518411  
0.723090646 0.575252275 CADM3/CBLN1 2

GO:0031430 CC M band 3/1182 28/170560.306466282 0.723090646 0.575252275  
ANK2/CRYAB/SMPX3

GO:0015629 CC actin cytoskeleton 37/1182 488/17056 0.307313524 0.723090646  
0.575252275  
ACTA2/ACTG2/ACTN2/ADD2/CALD1/CDH2/CRYAB/DCDC2C/DDR2/DPYSL3/FERMT2/FLNA/F  
MN2/GAS7/KLHL14/LDB3/LMOD1/LURAP1/MYH11/MYL3/MYL9/MYLK/MYO22/PALLD/PDLIM3/P

GM5/PVALB/SORBS1/SYNPO2/TNNT3/TPM2/VCAM1/WIPF1/ACTL8/MYH4/MYO1A/USH1G 37  
 GO:0005892 CC acetylcholine-gated channel complex 2/1182 17/170560.33169791  
 0.770013004 0.612581196 CHRNA3/CHRNA6 2  
 GO:0031143 CC pseudopodium 2/1182 17/170560.33169791 0.770013004  
 0.612581196 ACTN2/LDB3 2  
 GO:0090723 CC growth cone part 2/1182 17/170560.33169791 0.770013004  
 0.612581196 GAP43/LAMP5 2  
 GO:0005865 CC striated muscle thin filament 3/1182 30/170560.34537627 0.798202935  
 0.635007598 LMOD1/TNNT3/TPM2 3  
 GO:0031527 CC filopodium membrane 2/1182 18/170560.357587308 0.819142732  
 0.651666181 ANTXR1/GAP43 2  
 GO:0099092 CC postsynaptic density, intracellular component 2/1182 18/17056  
 0.357587308 0.819142732 0.651666181 ACTN2/PSD 2  
 GO:0036379 CC myofilament 3/1182 31/170560.364774586 0.831942038 0.661848625  
 LMOD1/TNNT3/TPM2 3  
 GO:0101003 CC ficolin-1-rich granule membrane 5/1182 58/170560.375003979  
 0.851537419 0.677437663 CLEC4C/CR1/ITGB2/NFASC/DSG1 5  
 GO:1902711 CC GABA-A receptor complex 2/1182 19/170560.383101119 0.864583778  
 0.687816649 GABRA5/GABRA4 2  
 GO:0098686 CC hippocampal mossy fiber to CA3 synapse 3/1182 32/170560.384074717  
 0.864583778 0.687816649 EPHA7/GRIK5/P2RX3 3  
 GO:0031234 CC extrinsic component of cytoplasmic side of plasma membrane 7/1182  
 86/170560.38690461 0.867199989 0.689897967  
 BLK/FERMT2/GNAO1/KCNIP1/STAC/GNGT1/TGM3 7  
 GO:0030136 CC clathrin-coated vesicle 14/1182 183/17056 0.390492579 0.871485584  
 0.693307357  
 APOE/ASTN1/CHRM2/CLVS2/HLA-DPA1/HLA-DPB1/HLA-DQA1/HLA-DQA2/HLA-DQB2/ROR2/  
 SLC18A3/SNAP91/FOLR1/REEP6 14  
 GO:0030672 CC synaptic vesicle membrane 8/1182 101/17056 0.40109906  
 0.887538345 0.706078076 LAMP5/PTPRS/SLC6A17/SV2B/SYT11/SYT4/SYT6/SYNGR4 8  
 GO:0099501 CC exocytic vesicle membrane 8/1182 101/17056 0.40109906  
 0.887538345 0.706078076 LAMP5/PTPRS/SLC6A17/SV2B/SYT11/SYT4/SYT6/SYNGR4 8  
 GO:0030863 CC cortical cytoskeleton 9/1182 115/17056 0.402948859 0.887853419  
 0.706328732 ACTN2/CALD1/CDH2/DCDC2C/FLNA/GYPC/PVALB/WIPF1/MYO1A 9  
 GO:0097228 CC sperm principal piece 2/1182 20/170560.408167079 0.891793618  
 0.709463344 NME8/AKAP4 2  
 GO:1902710 CC GABA receptor complex 2/1182 20/170560.408167079 0.891793618  
 0.709463344 GABRA5/GABRA4 2  
 GO:0001917 CC photoreceptor inner segment 4/1182 47/170560.412233663 0.893172936  
 0.710560656 ADGRV1/GNGT1/REEP6/USH1G 4  
 GO:0098563 CC intrinsic component of synaptic vesicle membrane 4/1182 47/17056  
 0.412233663 0.893172936 0.710560656 PTPRS/SLC6A17/SYT11/SYT4 4  
 GO:0070382 CC exocytic vesicle 15/1182 200/17056 0.414028013 0.893338452  
 0.710692331

DPYSL3/GRIA1/IGF1/LAMP5/NGF/PENK/PTPRS/SLC6A17/SNAP91/SV2B/SYT11/SYT4/SYT6/D  
 DC/SYNGR4 15  
 GO:0030864 CC cortical actin cytoskeleton 7/1182 89/170560.421587598 0.903516782  
 0.718789667 ACTN2/CALD1/CDH2/DCDC2C/PVALB/WIPF1/MYO1A 7  
 GO:0005790 CC smooth endoplasmic reticulum 3/1182 34/170560.422220342  
 0.903516782 0.718789667 CASQ1/JPH4/HSD3B1 3  
 GO:0098862 CC cluster of actin-based cell projections 11/1182 146/17056 0.432227954  
 0.918436152 0.73065872  
 CYBRD1/PVALB/ABCC2/ADGRV1/CA4/FOLR1/MYO1A/PDZD3/SI/SLC26A3/SLC34A3 11  
 GO:0099091 CC postsynaptic specialization, intracellular component 2/1182 21/17056  
 0.432724725 0.918436152 0.73065872 ACTN2/PSD 2  
 GO:0070820 CC tertiary granule 12/1182 161/17056 0.440213072 0.930531697  
 0.74028129  
 CLEC4C/CR1/CYBB/FRMPD3/ITGB2/LAIR1/NFASC/TIMP2/DSG1/OLFM4/ORM1/PRSS3 12  
 GO:0031514 CC motile cilium 12/1182 162/17056 0.448814695 0.944873042  
 0.751690497  
 DCDC2C/GLI2/NME8/TACR1/TACR2/AKAP4/CFAP52/DEFB1/LDHC/LYZL4/PMFBP1/SLC26A3  
 12  
 GO:0009898 CC cytoplasmic side of plasma membrane 11/1182 149/17056 0.459234208  
 0.962910437 0.766040084  
 BLK/FERMT2/GNAO1/KCNIP1/PGM5/PTPRC/STAC/ATP2C2/DSG1/GNGT1/TGM3 11  
 GO:0055037 CC recycling endosome 12/1182 164/17056 0.465976601 0.973123826  
 0.774165311  
 ACKR1/ANK2/CD22/CLIP3/EHD2/GRIA1/LAMP5/SORCS2/ST8SIA2/SYT11/TUBA1A/SLC30A10  
 12  
 GO:0032154 CC cleavage furrow 4/1182 51/170560.475024711 0.985783006  
 0.784236278 HMCN1/HTR3A/MYLK/PSD 4  
 GO:0030660 CC Golgi-associated vesicle membrane 8/1182 108/17056 0.475829874  
 0.985783006 0.784236278  
 GRIA1/HLA-DPA1/HLA-DPB1/HLA-DQA1/HLA-DQA2/HLA-DQB2/SLC18A3/FOLR1 8  
 GO:0005766 CC primary lysosome 11/1182 152/17056 0.486054837 0.999005988  
 0.794755776 BPI/CTSG/ELANE/GLIPR1/MPO/RETN/SERPINA3/DEFA1/ORM2/S100A7/TTR  
 11  
 GO:0042582 CC azurophil granule 11/1182 152/17056 0.486054837 0.999005988  
 0.794755776 BPI/CTSG/ELANE/GLIPR1/MPO/RETN/SERPINA3/DEFA1/ORM2/S100A7/TTR  
 11  
 GO:0031901 CC early endosome membrane 10/1182 138/17056 0.489306077 1  
 0.795546559 CLIP3/CLVS2/DKK1/GPNMB/GRIA1/LAMP5/NTRK2/RAB31/SORCS2/SYNDIG1  
 10  
 GO:0032039 CC integrator complex 2/1182 24/170560.502894025 1 0.795546559  
 CT45A10/CT45A5 2  
 GO:0005902 CC microvillus 6/1182 82/170560.50649015 1 0.795546559  
 AOC3/FMN2/NFASC/VCAM1/CEACAM20/MYO1A6  
 GO:0002177 CC manchette 1/1182 10/170560.512464176 1 0.795546559

# RIMBP3B 1

GO:0031313 CC extrinsic component of endosome membrane 1/1182 10/17056  
0.512464176 1 0.795546559 PSD 1

GO:0032585 CC multivesicular body membrane 1/1182 10/170560.512464176 1  
0.795546559 CD300LG 1

GO:0097197 CC tetraspanin-enriched microdomain 1/1182 10/170560.512464176 1  
0.795546559 SCIMP 1

GO:0008021 CC synaptic vesicle 13/1182 184/17056 0.512774771 1 0.795546559  
GRIA1/LAMP5/NGF/PENK/PTPRS/SLC6A17/SNAP91/SV2B/SYT11/SYT4/SYT6/DDC/SYNGR4  
13

GO:0048786 CC presynaptic active zone 5/1182 69/170560.525829052 1 0.795546559  
CDH10/CDH2/GPM6A/NTNG1/SYT11 5

GO:1904724 CC tertiary granule lumen 4/1182 55/170560.535092101 1 0.795546559  
TIMP2/OLFM4/ORM1/PRSS3 4

GO:0030027 CC lamellipodium 13/1182 188/17056 0.544716367 1 0.795546559  
ACTA2/ACTG2/ANTXR1/ARHGAP31/CDH2/CTNNA3/DPYSL3/FERMT2/KCNA2/MYLK/PALLD/S  
TMN2/IGF2BP1 13

GO:0000782 CC telomere cap complex 1/1182 11/170560.546270778 1 0.795546559  
TERT1

GO:0000783 CC nuclear telomere cap complex 1/1182 11/170560.546270778 1  
0.795546559 TERT1

GO:0031094 CC platelet dense tubular network 1/1182 11/170560.546270778 1  
0.795546559 MRVI1 1

GO:0031680 CC G-protein beta/gamma-subunit complex 1/1182 11/170560.546270778  
1 0.795546559 GNGT1 1

GO:0033178 CC proton-transporting two-sector ATPase complex, catalytic domain 1/1182  
11/170560.546270778 1 0.795546559 ATP6V1C2 1

GO:0034663 CC endoplasmic reticulum chaperone complex 1/1182 11/170560.546270778  
1 0.795546559 UGT1A1 1

GO:0089717 CC spanning component of membrane 1/1182 11/170560.546270778 1  
0.795546559 NLGN1 1

GO:0001891 CC phagocytic cup 2/1182 26/170560.546445992 1 0.795546559  
RAB31/SYT11 2

GO:0005640 CC nuclear outer membrane 2/1182 26/170560.546445992 1  
0.795546559 NAV3/SYNE1 2

GO:0042581 CC specific granule 11/1182 159/17056 0.547295745 1 0.795546559  
BPI/CYBB/ELANE/ITGB2/LAIR1/RETN/TIMP2/LCN2/OLFM4/ORM1/ORM2 11

GO:0016328 CC lateral plasma membrane 4/1182 56/170560.549568202 1  
0.795546559 BVES/KCNB1/DSG1/MYO1A 4

GO:0070821 CC tertiary granule membrane 5/1182 71/170560.551663605 1  
0.795546559 CLEC4C/CYBB/FRMPD3/ITGB2/LAIR1 5

GO:0030667 CC secretory granule membrane 20/1182 292/17056 0.555405802 1  
0.795546559  
CLEC4C/CR1/CYBB/FRMPD3/GLIPR1/ITGB2/LAIR1/MOXD1/NFASC/PCDH7/PECAM1/PTPRC/R

AB31/SELP/SPARC/SYT4/CA4/DMBT1/DSG1/ZG16 20

GO:0030662 CC coated vesicle membrane 12/1182 175/17056 0.558173979 1  
0.795546559

APOE/CHRM2/GRIA1/HLA-DPA1/HLA-DPB1/HLA-DQA1/HLA-DQA2/HLA-DQB2/ROR2/SLC18  
A3/FOLR1/REEP6 12

GO:0005952 CC cAMP-dependent protein kinase complex 1/1182 12/170560.577735016  
1 0.795546559 AKAP4 1

GO:0030130 CC clathrin coat of trans-Golgi network vesicle 1/1182 12/170560.577735016  
1 0.795546559 SLC18A3 1

GO:0030877 CC beta-catenin destruction complex 1/1182 12/170560.577735016 1  
0.795546559 DACT1 1

GO:0042555 CC MCM complex 1/1182 12/170560.577735016 1 0.795546559  
MCMDC2 1

GO:0060198 CC clathrin-sculpted vesicle 1/1182 12/170560.577735016 1 0.795546559  
SLC18A3 1

GO:0098845 CC postsynaptic endosome 1/1182 12/170560.577735016 1 0.795546559  
PSD 1

GO:1990454 CC L-type voltage-gated calcium channel complex 1/1182 12/17056  
0.577735016 1 0.795546559 CACNG7 1

GO:1990909 CC Wnt signalosome 1/1182 12/170560.577735016 1 0.795546559  
ADGRA2 1

GO:0005834 CC heterotrimeric G-protein complex 2/1182 28/170560.587253573 1  
0.795546559 GNAO1/GNGT1 2

GO:0044295 CC axonal growth cone 2/1182 28/170560.587253573 1 0.795546559  
BOC/GPM6A 2

GO:0070069 CC cytochrome complex 2/1182 28/170560.587253573 1 0.795546559  
COX7B2/UGT1A1 2

GO:1905360 CC GTPase complex 2/1182 28/170560.587253573 1 0.795546559  
GNAO1/GNGT1 2

GO:0097223 CC sperm part 12/1182 179/17056 0.590230487 1 0.795546559  
DCDC2C/NME8/SV2B/TACR1/TACR2/AKAP4/DEFB1/LYZL4/PMFBP1/SLC26A3/SPACA4/TEX10  
1 12

GO:0032155 CC cell division site part 4/1182 59/170560.591514919 1 0.795546559  
HMCN1/HTR3A/MYLK/PSD 4

GO:0000800 CC lateral element 1/1182 13/170560.607019058 1 0.795546559  
SYCP3 1

GO:0001931 CC uropod 1/1182 13/170560.607019058 1 0.795546559 SCIMP 1

GO:0031254 CC cell trailing edge 1/1182 13/170560.607019058 1 0.795546559  
SCIMP 1

GO:0033391 CC chromatoid body 1/1182 13/170560.607019058 1 0.795546559  
TDRD5 1

GO:0098691 CC dopaminergic synapse 1/1182 13/170560.607019058 1 0.795546559  
CHRNA6 1

GO:0055038 CC recycling endosome membrane 5/1182 76/170560.613038672 1

0.795546559 CLIP3/EHD2/GRIA1/LAMP5/SORCS2 5  
 GO:0044448 CC cell cortex part 11/1182 167/17056 0.613724762 1 0.795546559  
 ACTN2/CALD1/CDH2/DCDC2C/FLNA/GYPC/PVALB/WIPF1/ACTL8/FABP1/MYO1A 11  
 GO:0002102 CC podosome 2/1182 30/170560.625270952 1 0.795546559  
 PALLD/VCAM1 2  
 GO:0010369 CC chromocenter 1/1182 14/170560.634273853 1 0.795546559 SALL1  
 1  
 GO:0012510 CC trans-Golgi network transport vesicle membrane 1/1182 14/17056  
 0.634273853 1 0.795546559 SLC18A3 1  
 GO:0030673 CC axolemma 1/1182 14/170560.634273853 1 0.795546559 THY1  
 1  
 GO:0099523 CC presynaptic cytosol 1/1182 14/170560.634273853 1 0.795546559  
 PRKCB 1  
 GO:0005801 CC cis-Golgi network 4/1182 63/170560.643687854 1 0.795546559  
 GOLGA8H/GOLGA8M/GOLGA8O/RNF183 4  
 GO:0098562 CC cytoplasmic side of membrane 11/1182 172/17056 0.652702589 1  
 0.795546559  
 BLK/FERMT2/GNAO1/KCNIP1/PGM5/PTPRC/STAC/ATP2C2/DSG1/GNGT1/TGM3 11  
 GO:0032153 CC cell division site 4/1182 64/170560.656022529 1 0.795546559  
 HMCN1/HTR3A/MYLK/PSD 4  
 GO:0030122 CC AP-2 adaptor complex 1/1182 15/170560.659639908 1 0.795546559  
 SLC18A3 1  
 GO:0042575 CC DNA polymerase complex 1/1182 15/170560.659639908 1  
 0.795546559 TERT1  
 GO:0071437 CC invadopodium 1/1182 15/170560.659639908 1 0.795546559 NOX1  
 1  
 GO:0009925 CC basal plasma membrane 2/1182 33/170560.677112225 1 0.795546559  
 P2RY12/MYO1A 2  
 GO:0045178 CC basal part of cell 3/1182 50/170560.682908468 1 0.795546559  
 P2RY12/MYO1A/REG1A 3  
 GO:0016471 CC vacuolar proton-transporting V-type ATPase complex 1/1182 16/17056  
 0.683248008 1 0.795546559 ATP6V1C2 1  
 GO:0030128 CC clathrin coat of endocytic vesicle 1/1182 16/170560.683248008 1  
 0.795546559 SLC18A3 1  
 GO:0030479 CC actin cortical patch 1/1182 16/170560.683248008 1 0.795546559  
 WIPF1 1  
 GO:0033643 CC host cell part 1/1182 16/170560.683248008 1 0.795546559 AXL 1  
 GO:0045277 CC respiratory chain complex IV 1/1182 16/170560.683248008 1  
 0.795546559 COX7B2 1  
 GO:0061645 CC endocytic patch 1/1182 16/170560.683248008 1 0.795546559  
 WIPF1 1  
 GO:0005858 CC axonemal dynein complex 1/1182 17/170560.705219889 1  
 0.795546559 NME8 1  
 GO:0032433 CC filopodium tip 1/1182 17/170560.705219889 1 0.795546559 NLGN1

1

GO:0060077 CC inhibitory synapse 1/1182 17/170560.705219889 1 0.795546559  
 SYT11 1

GO:0097440 CC apical dendrite 1/1182 17/170560.705219889 1 0.795546559  
 FLNA 1

GO:0001772 CC immunological synapse 2/1182 35/170560.708318643 1 0.795546559  
 CD37/SCIMP 2

GO:0005938 CC cell cortex 18/1182 289/17056 0.715326352 1 0.795546559  
 ACTN2/AKAP12/CALD1/CDH2/DCDC2C/FERMT2/FLNA/FMN2/GYPC/HMCN1/PDZD4/PVALB/  
 WIPF1/ACTL8/FABP1/FGB/MYO1A/RHOV 18

GO:0005765 CC lysosomal membrane 21/1182 335/17056 0.715723827 1  
 0.795546559  
 ANXA6/COL6A1/CYBRD1/GLIPR1/GNB4/HLA-DOA/HLA-DPA1/HLA-DPB1/HLA-DQA1/HLA-DQ  
 A2/HLA-DQB2/LAMP5/LAPTM5/TLR7/TLR8/TLR9/ATP6V1C2/PCSK9/PLA2G4E/PLA2G4F/RNF183  
 21

GO:0032580 CC Golgi cisterna membrane 5/1182 86/170560.719751823 1  
 0.795546559 GOLGA8H/GOLGA8M/GOLGA8O/ST6GAL2/FUT3 5

GO:0005637 CC nuclear inner membrane 3/1182 53/170560.720668009 1  
 0.795546559 P2RX2/P2RX3/SUN3 3

GO:0098852 CC lytic vacuole membrane 21/1182 336/17056 0.720699428 1  
 0.795546559  
 ANXA6/COL6A1/CYBRD1/GLIPR1/GNB4/HLA-DOA/HLA-DPA1/HLA-DPB1/HLA-DQA1/HLA-DQ  
 A2/HLA-DQB2/LAMP5/LAPTM5/TLR7/TLR8/TLR9/ATP6V1C2/PCSK9/PLA2G4E/PLA2G4F/RNF183  
 21

GO:0005721 CC pericentric heterochromatin 1/1182 18/170560.725668864 1  
 0.795546559 IKZF1 1

GO:0016323 CC basolateral plasma membrane 13/1182 216/17056 0.740304563 1  
 0.795546559  
 ANK2/CD300LG/CDH2/GPIHBP1/P2RY12/TLR9/CDH16/CDH17/FOLR1/MTTP/MYO1A/RHBG/  
 RHCG 13

GO:0043296 CC apical junction complex 8/1182 137/17056 0.741090144 1  
 0.795546559 ADCYAP1R1/BVES/CLMP/FRMD6/JAM3/SORBS1/CLDN9/PDZD3 8

GO:0030904 CC retromer complex 1/1182 19/170560.744700406 1 0.795546559  
 MAGEL2 1

GO:0043186 CC P granule 1/1182 19/170560.744700406 1 0.795546559 TDRD5 1

GO:0045495 CC pole plasm 1/1182 19/170560.744700406 1 0.795546559 TDRD5  
 1

GO:0060293 CC germ plasm 1/1182 19/170560.744700406 1 0.795546559 TDRD5  
 1

GO:0005795 CC Golgi stack 8/1182 140/17056 0.762351356 1 0.795546559  
 CLIP3/GOLGA8H/GOLGA8M/GOLGA8O/ST6GAL2/SULF1/FUT3/GOLT1A 8

GO:0005697 CC telomerase holoenzyme complex 1/1182 20/170560.762412686 1  
 0.795546559 TERT1

GO:0030132 CC clathrin coat of coated pit 1/1182 20/170560.762412686 1

0.795546559 SLC18A3 1  
 GO:0005802 CC trans-Golgi network 13/1182 220/17056 0.7631331 1  
 0.795546559  
 CLIP3/CLVS2/HLA-DPA1/HLA-DPB1/HLA-DQA1/HLA-DQA2/HLA-DQB2/PI4K2B/PLD4/RAB31/  
 CA4/CHST5/GOLT1A 13  
 GO:1904115 CC axon cytoplasm 3/1182 57/170560.765444152 1 0.795546559  
 MAP1A/NEFL/UCHL1 3  
 GO:0005922 CC connexin complex 1/1182 21/170560.778897084 1 0.795546559  
 GJC31  
 GO:0101031 CC chaperone complex1/1182 21/170560.778897084 1 0.795546559  
 HSPB8 1  
 GO:0031985 CC Golgi cisterna 6/1182 110/17056 0.782481091 1 0.795546559  
 GOLGA8H/GOLGA8M/GOLGA8O/ST6GAL2/FUT3/GOLT1A 6  
 GO:0005891 CC voltage-gated calcium channel complex2/1182 41/170560.787081807 1  
 0.795546559 CACNA1G/CACNG7 2  
 GO:0010008 CC endosome membrane 28/1182 461/17056 0.793659919 1  
 0.795546559  
 ANTXR1/ANXA6/CD1C/CD300LG/CLIP3/CLVS2/DKK1/EHD2/GPNMB/GRIA1/HLA-DOA/HLA-D  
 PA1/HLA-DPB1/HLA-DQA1/HLA-DQA2/HLA-DQB2/LAMP5/MRC1/NTRK2/PSD/RAB31/SORCS2/SY  
 NDIG1/TLR7/TLR8/TLR9/PCSK9/RHOV 28  
 GO:0046930 CC pore complex 1/1182 22/170560.794238654 1 0.795546559 C7 1  
 GO:0000307 CC cyclin-dependent protein kinase holoenzyme complex 2/1182 42/17056  
 0.798220856 1 0.795546559 CCNA1/CNTD2  
 GO:0016235 CC aggresome 2/1182 42/170560.798220856 1 0.795546559  
 HSPB7/KLHL14 2  
 GO:0099738 CC cell cortex region 2/1182 42/170560.798220856 1 0.795546559  
 ACTL8/FABP1 2  
 GO:0000780 CC condensed nuclear chromosome, centromeric region 1/1182 23/17056  
 0.808516564 1 0.795546559 MEIKIN 1  
 GO:0031528 CC microvillus membrane 1/1182 23/170560.808516564 1 0.795546559  
 CEACAM20 1  
 GO:0097381 CC photoreceptor disc membrane 1/1182 23/170560.808516564 1  
 0.795546559 GNGT1 1  
 GO:0031312 CC extrinsic component of organelle membrane 2/1182 43/17056  
 0.808840201 1 0.795546559 PSD/SOX10 2  
 GO:0034704 CC calcium channel complex 3/1182 62/170560.81300256 1  
 0.795546559 CACNA1G/CACNG7/CASQ2 3  
 GO:0030135 CC coated vesicle 16/1182 279/17056 0.817756508 1 0.795546559  
 APOE/ASTN1/CHRM2/CLVS2/GRIA1/HLA-DPA1/HLA-DPB1/HLA-DQA1/HLA-DQA2/HLA-DQB2  
 /ROR2/SLC18A3/SNAP91/FOLR1/PCSK9/REEP6 16  
 GO:0101002 CC ficolin-1-rich granule 10/1182 182/17056 0.818049624 1  
 0.795546559 CLEC4C/CR1/CRISPLD2/FCN1/FGL2/ITGB2/KRT1/NFASC/TIMP2/DSG110  
 GO:0099522 CC region of cytosol 1/1182 24/170560.8218045 1 0.795546559  
 PRKCB 1

GO:1904949 CC ATPase complex 5/1182 99/170560.824572662 1 0.795546559  
ATP1A2/ATP1A4/EN1/PLN/FXYD4 5

GO:0030118 CC clathrin coat 2/1182 45/170560.828593576 1 0.795546559  
KCNQ5/SLC18A3 2

GO:0097542 CC ciliary tip 2/1182 45/170560.828593576 1 0.795546559 GLI2/GLI3  
2

GO:0010494 CC cytoplasmic stress granule 3/1182 64/170560.829604972 1  
0.795546559 CTSG/PABPC5/IGF2BP1 3

GO:0033176 CC proton-transporting V-type ATPase complex 1/1182 25/170560.83417105  
1 0.795546559 ATP6V1C2 1

GO:0070971 CC endoplasmic reticulum exit site 1/1182 25/170560.83417105 1  
0.795546559 CTAGE4 1

GO:0017053 CC transcriptional repressor complex 4/1182 83/170560.835763668 1  
0.795546559 ELANE/GLI3/TBX18/CDX2 4

GO:0005881 CC cytoplasmic microtubule 3/1182 65/170560.837421343 1 0.795546559  
CLMP/REEP2/TUBA1A 3

GO:0120111 CC neuron projection cytoplasm 4/1182 84/170560.842540478 1  
0.795546559 GRIK3/MAP1A/NEFL/UCHL1 4

GO:0005798 CC Golgi-associated vesicle 9/1182 171/17056 0.845673767 1  
0.795546559  
GRIA1/HLA-DPA1/HLA-DPB1/HLA-DQA1/HLA-DQA2/HLA-DQB2/SLC18A3/FOLR1/PCSK9 9

GO:0033116 CC endoplasmic reticulum-Golgi intermediate compartment membrane 3/1182  
68/170560.859037411 1 0.795546559 GRIA1/LAMP5/FOLR1 3

GO:0099568 CC cytoplasmic region 28/1182 482/17056 0.859729464 1 0.795546559  
ACTN2/AKAP12/ARMC4/CALD1/CDH2/DCDC2C/FERMT2/FLNA/FMN2/GLI2/GLI3/GRIK3/GYP  
C/HMCN1/ITGB2/MAP1A/NEFL/NME8/PDZD4/PVALB/UCHL1/WIPF1/ACTL8/CFAP52/FABP1/FGB/  
MYO1A/RHOV 28

GO:0042470 CC melanosome 5/1182 105/17056 0.860954896 1 0.795546559  
ANXA6/GPNMB/MYH11/SERPINF1/SLC45A25

GO:0048770 CC pigment granule 5/1182 105/17056 0.860954896 1 0.795546559  
ANXA6/GPNMB/MYH11/SERPINF1/SLC45A25

GO:0032420 CC stereocilium 2/1182 49/170560.86266802 1 0.795546559  
PVALB/ADGRV1 2

GO:0034707 CC chloride channel complex 2/1182 49/170560.86266802 1  
0.795546559 GABRA5/GABRA4 2

GO:0016469 CC proton-transporting two-sector ATPase complex 1/1182 28/17056  
0.866358976 1 0.795546559 ATP6V1C2 1

GO:0030125 CC clathrin vesicle coat 1/1182 28/170560.866358976 1 0.795546559  
SLC18A3 1

GO:0030131 CC clathrin adaptor complex 1/1182 28/170560.866358976 1  
0.795546559 SLC18A3 1

GO:1990752 CC microtubule end 1/1182 28/170560.866358976 1 0.795546559  
NAV3 1

GO:0060170 CC ciliary membrane 4/1182 88/170560.867335056 1 0.795546559

CYS1/EVC/EVC2/GNGT1 4

GO:0005774 CC vacuolar membrane 22/1182 390/17056 0.869407863 1  
0.795546559  
ANXA6/COL6A1/CYBRD1/GLIPR1/GNB4/HLA-DOA/HLA-DPA1/HLA-DPB1/HLA-DQA1/HLA-DQ  
A2/HLA-DQB2/LAMP5/LAPTM5/MAP1LC3C/TLR7/TLR8/TLR9/ATP6V1C2/PCSK9/PLA2G4E/PLA2G  
4F/RNF183 22

GO:0030176 CC integral component of endoplasmic reticulum membrane 7/1182  
143/17056 0.874177 1 0.795546559  
HLA-DPA1/HLA-DPB1/HLA-DQA1/HLA-DQA2/HLA-DQB2/G6PC/RNF183 7

GO:0090568 CC nuclear transcriptional repressor complex 1/1182 29/170560.875635679  
1 0.795546559 TBX18 1

GO:0016363 CC nuclear matrix 5/1182 108/17056 0.87663759 1 0.795546559  
RUNX1T1/SORBS1/SPARC/TGFB1I1/VIM 5

GO:0005782 CC peroxisomal matrix 2/1182 51/170560.877270523 1 0.795546559  
AGXT/FABP1 2

GO:0031907 CC microbody lumen 2/1182 51/170560.877270523 1 0.795546559  
AGXT/FABP1 2

GO:0005720 CC nuclear heterochromatin 1/1182 30/170560.884268945 1  
0.795546559 IKZF1 1

GO:0030140 CC trans-Golgi network transport vesicle 1/1182 30/170560.884268945 1  
0.795546559 SLC18A3 1

GO:0030670 CC phagocytic vesicle membrane 3/1182 73/170560.889488775 1  
0.795546559 CYBB/RAB31/DMBT1 3

GO:0005921 CC gap junction 1/1182 31/170560.892303369 1 0.795546559 GJC31

GO:0080008 CC Cul4-RING E3 ubiquitin ligase complex 1/1182 31/170560.892303369 1  
0.795546559 DCAF12L2 1

GO:0032421 CC stereocilium bundle 2/1182 54/170560.896504014 1 0.795546559  
PVALB/ADGRV1 2

GO:0032839 CC dendrite cytoplasm 1/1182 32/170560.899780457 1 0.795546559  
GRIK3 1

GO:0031227 CC intrinsic component of endoplasmic reticulum membrane 7/1182  
150/17056 0.902167318 1 0.795546559  
HLA-DPA1/HLA-DPB1/HLA-DQA1/HLA-DQA2/HLA-DQB2/G6PC/RNF183 7

GO:0000421 CC autophagosome membrane 1/1182 33/170560.906738839 1  
0.795546559 MAP1LC3C 1

GO:0036464 CC cytoplasmic ribonucleoprotein granule 10/1182 205/17056 0.909411161  
1 0.795546559  
CPEB1/CTSG/GHR/MAP1LC3C/PABPC5/SYNE1/TUBA1A/IGF2BP1/TDRD5/TRIM71 10

GO:0005930 CC axoneme 5/1182 116/17056 0.911272774 1 0.795546559  
ARMC4/GLI2/GLI3/NME8/CFAP52 5

GO:0031904 CC endosome lumen 1/1182 34/170560.913214472 1 0.795546559  
IL12B 1

GO:0051233 CC spindle midzone 1/1182 34/170560.913214472 1 0.795546559  
CCDC69 1

GO:0097014 CC ciliary plasm 5/1182 117/17056 0.914939707 1 0.795546559  
 ARMC4/GLI2/GLI3/NME8/CFAP52 5

GO:1990204 CC oxidoreductase complex 4/1182 99/170560.918908936 1 0.795546559  
 CYBB/NDUFC2-KCTD14/DUOX2/NOX1 4

GO:0032391 CC photoreceptor connecting cilium 1/1182 36/170560.92484903 1  
 0.795546559 USH1G 1

GO:0000932 CC P-body 3/1182 81/170560.926099998 1 0.795546559  
 CPEB1/SYNE1/TRIM71 3

GO:0005923 CC bicellular tight junction 5/1182 121/17056 0.928305698 1  
 0.795546559 ADCYAP1R1/BVES/CLMP/JAM3/CLDN9 5

GO:0044447 CC axoneme part 1/1182 37/170560.930068093 1 0.795546559 NME8  
 1

GO:0005793 CC endoplasmic reticulum-Golgi intermediate compartment 5/1182  
 122/17056 0.931340694 1 0.795546559 FN1/GRIA1/LAMP5/CA4/FOLR1 5

GO:0031970 CC organelle envelope lumen 3/1182 84/170560.936685614 1  
 0.795546559 BCHE/MYOC/HSD3B1 3

GO:1904813 CC ficolin-1-rich granule lumen 5/1182 124/17056 0.937068622 1  
 0.795546559 CRISPLD2/FCN1/FGL2/KRT1/TIMP2 5

GO:0035770 CC ribonucleoprotein granule 10/1182 216/17056 0.937150753 1  
 0.795546559  
 CPEB1/CTSG/GHR/MAP1LC3C/PABPC5/SYNE1/TUBA1A/IGF2BP1/TDRD5/TRIM71 10

GO:0031228 CC intrinsic component of Golgi membrane 2/1182 63/170560.93864334  
 1 0.795546559 SYT4/CHST5 2

GO:0000795 CC synaptonemal complex 1/1182 39/170560.939444831 1 0.795546559  
 SYCP3 1

GO:0099086 CC synaptonemal structure 1/1182 39/170560.939444831 1 0.795546559  
 SYCP3 1

GO:0070160 CC tight junction 5/1182 125/17056 0.939768665 1 0.795546559  
 ADCYAP1R1/BVES/CLMP/JAM3/CLDN9 5

GO:0001669 CC acrosomal vesicle 4/1182 106/17056 0.941558387 1 0.795546559  
 SV2B/LYZL4/SPACA4/TEX101 4

GO:0032838 CC plasma membrane bounded cell projection cytoplasm 9/1182 201/17056  
 0.943277008 1 0.795546559  
 ARMC4/GLI2/GLI3/GRIK3/MAP1A/NEFL/NME8/UCLH1/CFAP52 9

GO:0009295 CC nucleoid 1/1182 40/170560.94365099 1 0.795546559 TERT1

GO:0042645 CC mitochondrial nucleoid 1/1182 40/170560.94365099 1 0.795546559  
 TERT1

GO:1902911 CC protein kinase complex 4/1182 107/17056 0.944275784 1  
 0.795546559 CCNA1/SORBS1/CNTD2/TRIM40 4

GO:1902554 CC serine/threonine protein kinase complex 3/1182 87/170560.945854691  
 1 0.795546559 CCNA1/CNTD2/TRIM40 3

GO:0005747 CC mitochondrial respiratory chain complex I 1/1182 42/170560.951207765  
 1 0.795546559 NDUFC2-KCTD14 1

GO:0030964 CC NADH dehydrogenase complex 1/1182 42/170560.951207765 1

0.795546559 NDUFC2-KCTD14 1  
 GO:0045271 CC respiratory chain complex I 1/1182 42/170560.951207765 1  
 0.795546559 NDUFC2-KCTD14 1  
 GO:0034399 CC nuclear periphery 5/1182 130/17056 0.951765933 1 0.795546559  
 RUNX1T1/SORBS1/SPARC/TGFB1I1/VIM 5  
 GO:0035579 CC specific granule membrane 3/1182 90/170560.953776445 1  
 0.795546559 CYBB/ITGB2/LAIR1 3  
 GO:0030119 CC AP-type membrane coat adaptor complex 1/1182 43/170560.954597469  
 1 0.795546559 SLC18A3 1  
 GO:0032587 CC ruffle membrane 3/1182 91/170560.956166795 1 0.795546559  
 PLEKHO1/PSD/PLA2G4F 3  
 GO:0005905 CC clathrin-coated pit 2/1182 69/170560.957051298 1 0.795546559  
 SLC18A3/SNAP91 2  
 GO:0000794 CC condensed nuclear chromosome 3/1182 93/170560.960604189 1  
 0.795546559 MEIKIN/CDX2/SYCP3 3  
 GO:0000792 CC heterochromatin 2/1182 71/170560.961913707 1 0.795546559  
 IKZF1/SALL1 2  
 GO:0005844 CC polysome 2/1182 71/170560.961913707 1 0.795546559 DAZL/VIM  
 2  
 GO:0098803 CC respiratory chain complex 2/1182 71/170560.961913707 1  
 0.795546559 NDUFC2-KCTD14/COX7B2 2  
 GO:0031519 CC PcG protein complex 1/1182 46/170560.963418906 1 0.795546559  
 ASXL3 1  
 GO:0005771 CC multivesicular body 1/1182 48/170560.968326341 1 0.795546559  
 CD300LG 1  
 GO:0008023 CC transcription elongation factor complex 1/1182 48/170560.968326341 1  
 0.795546559 AFF3 1  
 GO:0016605 CC PML body 3/1182 98/170560.969920564 1 0.795546559  
 MAGEA2/MAGEA2B/TERT 3  
 GO:0005746 CC mitochondrial respiratory chain 2/1182 75/170560.970100553 1  
 0.795546559 NDUFC2-KCTD14/COX7B2 2  
 GO:0005758 CC mitochondrial intermembrane space 2/1182 76/170560.971865453 1  
 0.795546559 MYOC/HSD3B1 2  
 GO:0030286 CC dynein complex 1/1182 51/170560.974482022 1 0.795546559  
 NME8 1  
 GO:0005811 CC lipid droplet 2/1182 80/170560.977970901 1 0.795546559  
 FABP4/PLIN4 2  
 GO:0016234 CC inclusion body 2/1182 80/170560.977970901 1 0.795546559  
 HSPB7/KLHL14 2  
 GO:0001726 CC ruffle 6/1182 168/17056 0.978601145 1 0.795546559  
 LAYN/PALLD/PLEKHO1/PSD/WIPF1/PLA2G4F 6  
 GO:0005777 CC peroxisome 4/1182 129/17056 0.981312181 1 0.795546559  
 VIM/AGXT/FABP1/XDH 4  
 GO:0042579 CC microbody 4/1182 129/17056 0.981312181 1 0.795546559

VIM/AGXT/FABP1/XDH 4

GO:0070469 CC respiratory chain 2/1182 83/170560.981686647 1 0.795546559  
NDUFC2-KCTD14/COX7B2 2

GO:0015030 CC Cajal body 1/1182 56/170560.982201306 1 0.795546559 HSPB7  
1

GO:0030120 CC vesicle coat 1/1182 56/170560.982201306 1 0.795546559 SLC18A3  
1

GO:0097733 CC photoreceptor cell cilium 3/1182 108/17056 0.98266802 1  
0.795546559 CNGB3/GNGT1/USH1G 3

GO:0035577 CC azurophil granule membrane 1/1182 57/170560.983438839 1  
0.795546559 GLIPR1 1

GO:0001750 CC photoreceptor outer segment 2/1182 85/170560.983817813 1  
0.795546559 CNGB3/GNGT1 2

GO:0097731 CC 9+0 non-motile cilium 3/1182 110/17056 0.984503802 1  
0.795546559 CNGB3/GNGT1/USH1G 3

GO:0030173 CC integral component of Golgi membrane 1/1182 58/170560.984590394  
1 0.795546559 SYT41

GO:0045171 CC intercellular bridge 1/1182 59/170560.985661941 1 0.795546559  
EHD2 1

GO:0005776 CC autophagosome 2/1182 87/170560.985707124 1 0.795546559  
MAP1LC3C/PEG3 2

GO:0022625 CC cytosolic large ribosomal subunit 1/1182 60/170560.986659034 1  
0.795546559 RPL3L 1

GO:0035869 CC ciliary transition zone 1/1182 62/170560.988450175 1 0.795546559  
USH1G 1

GO:0031301 CC integral component of organelle membrane 7/1182 202/17056  
0.988458996 1 0.795546559 CNR1/P2RX2/PTPRS/SLC6A17/SYT11/SYT4/P2RX3 7

GO:0090575 CC RNA polymerase II transcription factor complex 5/1182 161/17056  
0.988906549 1 0.795546559 RXRG/ASCL2/FOXH1/NEUROD1/NR1I2 5

GO:0099023 CC tethering complex 1/1182 63/170560.989253511 1 0.795546559  
SYNPO2 1

GO:0031300 CC intrinsic component of organelle membrane 8/1182 225/17056  
0.989792498 1 0.795546559 CNR1/P2RX2/PTPRS/SLC6A17/SYT11/SYT4/CHST5/P2RX3  
8

GO:0030117 CC membrane coat 2/1182 93/170560.990175425 1 0.795546559  
KCNQ5/SLC18A3 2

GO:0048475 CC coated membrane 2/1182 93/170560.990175425 1 0.795546559  
KCNQ5/SLC18A3 2

GO:0032592 CC integral component of mitochondrial membrane 1/1182 67/17056  
0.991945988 1 0.795546559 CNR1 1

GO:0036064 CC ciliary basal body 3/1182 122/17056 0.992167386 1 0.795546559  
EVC/CFAP52/USH1G 3

GO:0098573 CC intrinsic component of mitochondrial membrane 1/1182 68/17056  
0.992506342 1 0.795546559 CNR1 1

GO:0044438 CC microbody part 2/1182 98/170560.992829864 1 0.795546559  
 AGXT/FABP1 2

GO:0044439 CC peroxisomal part 2/1182 98/170560.992829864 1 0.795546559  
 AGXT/FABP1 2

GO:0031902 CC late endosome membrane 3/1182 125/17056 0.993412868 1  
 0.795546559 ANXA6/CD300LG/LAMP5 3

GO:0018995 CC host 1/1182 71/170560.993964304 1 0.795546559 AXL 1

GO:0043657 CC host cell 1/1182 71/170560.993964304 1 0.795546559 AXL 1

GO:0031965 CC nuclear membrane 10/1182 279/17056 0.994393818 1 0.795546559  
 CMTM3/MRGPRF/NAV3/P2RX2/PRICKLE1/PRICKLE2/PTGDS/SYNE1/P2RX3/SUN3 10

GO:0044441 CC ciliary part 18/1182 432/17056 0.994482101 1 0.795546559  
 ARMC4/CYS1/EVC/EVC2/GLI2/GLI3/NME8/TACR1/TACR2/AKAP4/CFAP52/CNGB3/DEFB1/FA  
 M183A/GNGT1/PMFBP1/SLC26A3/USH1G 18

GO:0005667 CC transcription factor complex 14/1182 360/17056 0.995055391 1  
 0.795546559  
 BEX1/HAND2/RXRG/SIX2/SMAD9/WWTR1/ASCL2/FOXH1/HOXA11/HOXB13/MLXIPL/NEURO  
 D1/NR1I2/SIX3 14

GO:0070603 CC SWI/SNF superfamily-type complex 1/1182 74/170560.995138799 1  
 0.795546559 EN1 1

GO:0044215 CC other organism 1/1182 75/170560.995477154 1 0.795546559 AXL  
 1

GO:0044216 CC other organism cell 1/1182 75/170560.995477154 1 0.795546559 AXL  
 1

GO:0044217 CC other organism part 1/1182 75/170560.995477154 1 0.795546559  
 AXL 1

GO:0032993 CC protein-DNA complex 2/1182 110/17056 0.996661031 1  
 0.795546559 HOXA11/TERT 2

GO:0097730 CC non-motile cilium 3/1182 140/17056 0.997266503 1 0.795546559  
 CNGB3/GNGT1/USH1G 3

GO:0031968 CC organelle outer membrane 5/1182 190/17056 0.99749823 1  
 0.795546559 CNR1/MYOC/NAV3/SOX10/SYNE1 5

GO:0019867 CC outer membrane 5/1182 192/17056 0.997749878 1 0.795546559  
 CNR1/MYOC/NAV3/SOX10/SYNE1 5

GO:0005643 CC nuclear pore 1/1182 86/170560.997955269 1 0.795546559  
 RANBP3L 1

GO:0005635 CC nuclear envelope 17/1182 442/17056 0.998064089 1 0.795546559  
 BCHE/CMTM3/CYBB/LMNTD1/MRGPRF/NAV3/P2RX2/PRICKLE1/PRICKLE2/PTGDS/PTGER3/  
 RANBP3L/SYNE1/GOLT1A/P2RX3/SCGB1A1/SUN3 17

GO:0000790 CC nuclear chromatin 10/1182 306/17056 0.998263694 1 0.795546559  
 AR/ASXL3/EN1/FOXD3/HAND2/IKZF1/MYOC/PHOX2A/ZEB2/FOXH1 10

GO:0044798 CC nuclear transcription factor complex 5/1182 199/17056 0.998452014  
 1 0.795546559 RXRG/ASCL2/FOXH1/NEUROD1/NR1I2 5

GO:0005875 CC microtubule associated complex 3/1182 150/17056 0.998496216 1  
 0.795546559 MAP1A/NME8/ACTL8 3

GO:0000777 CC condensed chromosome kinetochore 1/1182 96/170560.999006878 1  
0.795546559 MEIKIN 1

GO:0044455 CC mitochondrial membrane part 4/1182 184/17056 0.99907593 1  
0.795546559 CNR1/NDUFC2-KCTD14/SOX10/COX7B2 4

GO:0000784 CC nuclear chromosome, telomeric region 1/1182 98/170560.999140486 1  
0.795546559 TERT1

GO:0098800 CC inner mitochondrial membrane protein complex 1/1182 99/17056  
0.999200395 1 0.795546559 NDUFC2-KCTD14 1

GO:0005814 CC centriole 2/1182 134/17056 0.99929647 1 0.795546559  
TCP10/TCP10L2 2

GO:0005741 CC mitochondrial outer membrane 3/1182 167/17056 0.99946498 1  
0.795546559 CNR1/MYOC/SOX10 3

GO:0000779 CC condensed chromosome, centromeric region 1/1182 107/17056  
0.999551477 1 0.795546559 MEIKIN 1

GO:0022626 CC cytosolic ribosome 1/1182 107/17056 0.999551477 1 0.795546559  
RPL3L 1

GO:0030880 CC RNA polymerase complex 1/1182 107/17056 0.999551477 1  
0.795546559 TERT1

GO:0000775 CC chromosome, centromeric region 3/1182 180/17056 0.999760365 1  
0.795546559 IKZF1/MEIKIN/SYCP3 3

GO:0015934 CC large ribosomal subunit 1/1182 117/17056 0.999782355 1  
0.795546559 RPL3L 1

GO:0005770 CC late endosome 5/1182 244/17056 0.999872959 1 0.795546559  
ANXA6/CD300LG/IL12B/LAMP5/PCSK9 5

GO:0000776 CC kinetochore 1/1182 126/17056 0.999886512 1 0.795546559  
MEIKIN 1

GO:0001650 CC fibrillar center 1/1182 128/17056 0.999901806 1 0.795546559  
YBX2 1

GO:0061695 CC transferase complex, transferring phosphorus-containing groups 5/1182  
252/17056 0.999919748 1 0.795546559 CCNA1/SORBS1/CNTD2/TERT/TRIM40 5

GO:0000781 CC chromosome, telomeric region 1/1182 131/17056 0.999920973 1  
0.795546559 TERT1

GO:0000793 CC condensed chromosome 3/1182 203/17056 0.999943458 1  
0.795546559 MEIKIN/CDX2/SYCP3 3

GO:0000785 CC chromatin 13/1182 454/17056 0.999964436 1 0.795546559  
AR/ASXL3/EN1/FOXD3/HAND2/HIC1/IKZF1/MYOC/PHOX2A/SOX10/ZEB2/FOXH1/SALL1 13

GO:0044450 CC microtubule organizing center part 2/1182 179/17056 0.999964748  
1 0.795546559 TCP10/TCP10L2 2

GO:0031461 CC cullin-RING ubiquitin ligase complex 1/1182 152/17056 0.999982738  
1 0.795546559 DCAF12L2 1

GO:0044445 CC cytosolic part 3/1182 230/17056 0.999989943 1 0.795546559  
PRKCB/RPL3L/TRIM40 3

GO:0000922 CC spindle pole 1/1182 160/17056 0.999990335 1 0.795546559  
RASSF10 1

GO:0030496 CC midbody 1/1182 162/17056 0.99999164 1 0.795546559 CCDC69  
1

GO:0044454 CC nuclear chromosome part 13/1182 492/17056 0.999994371 1  
0.795546559  
AR/ASXL3/EN1/FOXD3/HAND2/IKZF1/MEIKIN/MYOC/PHOX2A/ZEB2/FOXH1/SYCP3/TERT  
13

GO:0044452 CC nucleolar part 1/1182 171/17056 0.999995649 1 0.795546559  
YBX2 1

GO:0005874 CC microtubule 9/1182 406/17056 0.999996096 1 0.795546559  
CLMP/DCDC2C/MAP1A/MAP1LC3C/NAV3/REEP2/ROR2/SLC8A1/TUBA1A 9

GO:0016607 CC nuclear speck 8/1182 382/17056 0.999996213 1 0.795546559  
AR/FNDC1/GLI2/GLI3/MEOX2/SNURF/SERPINB13/TERT 8

GO:0098687 CC chromosomal region 5/1182 307/17056 0.999996897 1  
0.795546559 IKZF1/MEIKIN/SALL1/SYCP3/TERT 5

GO:0044391 CC ribosomal subunit 1/1182 184/17056 0.999998307 1 0.795546559  
RPL3L 1

GO:0019866 CC organelle inner membrane 9/1182 472/17056 0.9999999 1  
0.795546559  
MYOC/NDUFC2-KCTD14/P2RX2/COX7B2/HSD3B1/OTC/P2RX3/SLC25A48/SUN39

GO:0005840 CC ribosome 1/1182 223/17056 0.999999901 1 0.795546559 RPL3L  
1

GO:0098798 CC mitochondrial protein complex 1/1182 223/17056 0.999999901 1  
0.795546559 NDUFC2-KCTD14 1

GO:0000151 CC ubiquitin ligase complex 2/1182 272/17056 0.99999994 1  
0.795546559 ASB2/DCAF12L2 2

GO:0005743 CC mitochondrial inner membrane 6/1182 418/17056 0.99999998 1  
0.795546559 MYOC/NDUFC2-KCTD14/COX7B2/HSD3B1/OTC/SLC25A48 6

GO:0005819 CC spindle 3/1182 335/17056 0.99999999 1 0.795546559  
CCDC69/FMN2/RASSF103

GO:0005759 CC mitochondrial matrix 6/1182 445/17056 0.999999996 1  
0.795546559 CASQ1/PABPC5/AGXT/AGXT2/OTC/TERT 6

GO:0005813 CC centrosome 5/1182 491/17056 1 1 0.795546559  
CCDC8/NDN/SORBS1/ACTL8/CTAG2 5

Table-S7: The relative scores of c2.KEGG.gene sets in distinct GNAI2 immune microenvironment modification patterns by GSVA analysis

|                |          |                                              |                                   |                              |              |              |
|----------------|----------|----------------------------------------------|-----------------------------------|------------------------------|--------------|--------------|
| Sample         | Patterns | PPAR_SIGNALING_PATHWAY                       | BASE_EXCISION_REPAIR              |                              |              |              |
|                |          | NUCLEOTIDE_EXCISION_REPAIR                   | MISMATCH_REPAIR                   | MAPK_SIGNALING_PATHWAY       |              |              |
|                |          | CYTOKINE_CYTOKINE_RECEPTOR_INTERACTION       | CHEMOKINE_SIGNALING_PATHWAY       |                              |              |              |
|                |          | APOPTOSIS                                    | WNT_SIGNALING_PATHWAY             | TGF_BETA_SIGNALING_PATHWAY   |              |              |
|                |          | FOCAL_ADHESION                               | ECM_RECEPTOR_INTERACTION          | CELL_ADHESION_MOLECULES_CAMS |              |              |
|                |          | ANTIGEN_PROCESSING_AND_PRESENTATION          |                                   |                              |              |              |
|                |          | TOLL_LIKE_RECEPTOR_SIGNALING_PATHWAY         |                                   |                              |              |              |
|                |          | NOD_LIKE_RECEPTOR_SIGNALING_PATHWAY          |                                   |                              |              |              |
|                |          | NATURAL_KILLER_CELL_MEDIATED_CYTOTOXICITY    |                                   |                              |              |              |
|                |          | T_CELL_RECEPTOR_SIGNALING_PATHWAY            | B_CELL_RECEPTOR_SIGNALING_PATHWAY |                              |              |              |
|                |          | INTESTINAL_IMMUNE_NETWORK_FOR_IGA_PRODUCTION | PATHWAYS_IN_CANCER                | GLIOMA                       |              |              |
|                |          | BASAL_CELL_CARCINOMA                         | MELANOMA                          | ALLOGRAFT_REJECTION          |              |              |
|                |          | GRAFT_VERSUS_HOST_DISEASE                    |                                   |                              |              |              |
| TCGA-3M-AB46   | A        | -0.023291614                                 | 0.18884909                        | 0.257758438                  | 0.417469772  |              |
|                |          | -0.307917672                                 | -0.156700692                      | -0.250231149                 | -0.3750103   | -0.239951944 |
|                |          | -0.330202733                                 | -0.241993871                      | -0.399054228                 | -0.278264277 | -0.280623113 |
|                |          | -0.380622832                                 | -0.376193445                      | -0.465296673                 | -0.291207159 | -0.248891396 |
|                |          | -0.081486739                                 | -0.267818488                      | -0.343071694                 | -0.430332097 |              |
| TCGA-B7-5818A  |          | -0.064886498                                 | 0.352975274                       | 0.337664557                  | 0.353139334  | -0.008221142 |
|                |          | 0.177960319                                  | 0.153400241                       | 0.139021304                  | -0.205783617 | -0.151355812 |
|                |          | 0.010217995                                  | 0.118413703                       | 0.483236683                  | 0.246059306  | 0.262275113  |
|                |          | 0.23890175                                   | 0.210664348                       | 0.395902772                  | -0.003004014 | -0.020955373 |
|                |          | -0.099672551                                 | 0.595570847                       | 0.602839283                  |              | -0.325383574 |
| TCGA-B7-A5TI B |          | 0.1228767                                    | 0.098462889                       | 0.356793649                  | 0.129980343  | 0.013742865  |
|                |          | -0.129063504                                 | 0.016652164                       | 0.147113226                  | -0.095088585 | 0.003286981  |
|                |          | 0.382849076                                  | -0.013310497                      | -0.312644957                 | -0.062293462 | -0.141082581 |
|                |          | -0.002736014                                 | 0.03284759                        | -0.284745841                 | 0.037644522  | 0.159720665  |
|                |          | 0.100379961                                  | -0.482933288                      | -0.409801962                 |              | -0.255540747 |
| TCGA-B7-A5TJ A |          | 0.370940542                                  | 0.053671059                       | -0.224159007                 | -0.305291766 | -0.170434895 |
|                |          | -0.338149876                                 | -0.317385839                      | -0.259781328                 | 0.160138768  | -0.027930891 |
|                |          | -0.134729977                                 | -0.297940913                      | -0.434868347                 | -0.32848397  | -0.394901543 |
|                |          | -0.337437339                                 | -0.274636847                      | -0.54463117                  | -0.100741758 | -0.108775005 |
|                |          | -0.170088238                                 | -0.593601759                      | -0.587999669                 |              | 0.308419683  |
| TCGA-B7-A5TKB  |          | 0.013059899                                  | -0.087157373                      | 0.322690397                  | 0.254056516  | 0.114283597  |
|                |          | 0.461769149                                  | 0.378290378                       | 0.280478786                  | -0.164378267 | 0.193082595  |
|                |          | 0.39395248                                   | 0.438399725                       | 0.598101865                  | 0.38024088   | 0.338233245  |
|                |          | 0.274064581                                  | 0.210800115                       | 0.524682837                  | 0.050307952  | -0.110977119 |
|                |          | 0.07299731                                   | 0.772488553                       | 0.767997231                  |              | -0.379652295 |
| TCGA-B7-A5TN   | B        | -0.240824893                                 | 0.078591766                       | -0.189575287                 | -0.408441122 | 0.036251745  |
|                |          | -0.108255042                                 | -0.162237291                      | -0.017629506                 | 0.135006204  | 0.127217232  |
|                |          | 0.384528819                                  | 0.041781796                       | 0.120012259                  | 0.007714894  | 0.041371989  |
|                |          |                                              |                                   |                              |              | -0.193091214 |

|               |              |              |              |              |              |              |
|---------------|--------------|--------------|--------------|--------------|--------------|--------------|
|               | -0.111869501 | -0.219064576 | -0.008077232 | 0.078825831  | -0.056245127 | 0.337645629  |
|               | 0.078590191  | 0.318830372  | 0.062699338  |              |              |              |
| TCGA-BR-6452B | -0.112527996 | 0.322297012  | 0.422035436  | 0.073166059  | 0.093026843  |              |
|               | -0.027726384 | 0.167846802  | 0.45837296   | 0.254966297  | 0.194279152  | 0.121625649  |
|               | -0.176477848 | -0.292304734 | 0.197441447  | 0.321371764  | 0.302136159  | 0.272870361  |
|               | 0.344982702  | 0.328101811  | -0.240641312 | 0.241697553  | 0.292371145  | 0.108306834  |
|               | 0.16313258   | -0.317610231 | -0.060374722 |              |              |              |
| TCGA-BR-6453A | 0.46727438   | -0.331744043 | -0.541258646 | -0.587302755 | 0.067338819  |              |
|               | 0.408024628  | 0.32301723   | 0.017704837  | -0.053210888 | -0.162373866 | -0.102868709 |
|               | -0.119251353 | 0.503393263  | 0.28941431   | 0.139472337  | 0.093040191  | 0.221750691  |
|               | 0.185580916  | 0.297843859  | 0.708695581  | -0.102311328 | -0.089136922 | 0.069708262  |
|               | -0.067082933 | 0.654738765  | 0.632071604  |              |              |              |
| TCGA-BR-6455B | -0.08654779  | 0.476038505  | 0.569022802  | 0.669735555  | -0.016847996 |              |
|               | -0.085191826 | 0.011307208  | 0.292573243  | 0.102372007  | 0.041328417  | -0.139807689 |
|               | -0.285889135 | 0.057270572  | 0.344149253  | 0.225321736  | 0.227944491  | 0.10659394   |
|               | 0.267085327  | 0.237182712  | -0.038511729 | 0.109802909  | 0.03239582   | -0.08387404  |
|               | 0.131900608  | 0.109571725  | 0.244030552  |              |              |              |
| TCGA-BR-6456B | -0.051949158 | -0.084177359 | 0.06370585   | 0.208339474  | 0.332207861  |              |
|               | 0.128409089  | 0.222158081  | 0.277351789  | 0.286720669  | 0.37806436   | 0.410342993  |
|               | 0.332474703  | 0.241378792  | -0.165560928 | 0.318327977  | 0.254104644  | 0.135966762  |
|               | 0.401248505  | 0.441983796  | 0.127263465  | 0.33595167   | 0.345529626  | 0.348673821  |
|               | 0.225762747  | 0.079585816  | -0.12362791  |              |              |              |
| TCGA-BR-6457B | 0.531556724  | -0.544823563 | -0.652887193 | -0.695827006 | 0.220687043  |              |
|               | 0.295373308  | 0.23372766   | -0.062992064 | 0.148067042  | 0.261487674  | 0.270629106  |
|               | 0.374872646  | 0.513294096  | 0.249963094  | -0.032421684 | -0.270613727 | 0.246243539  |
|               | 0.097721467  | 0.175661811  | 0.552207872  | 0.136593579  | 0.13702309   | 0.454164447  |
|               | 0.284912269  | 0.382535142  | 0.43555952   |              |              |              |
| TCGA-BR-6458B | 0.282533051  | -0.244128876 | -0.473455862 | -0.225737713 | 0.083132514  |              |
|               | 0.244779966  | 0.193435094  | 0.036136645  | 0.052200002  | 0.191121466  | -0.075605173 |
|               | -0.116558815 | 0.380066881  | 0.417340249  | 0.195244505  | -0.040347195 | 0.324209823  |
|               | 0.29930076   | 0.250158112  | 0.588165145  | 0.109782226  | 0.09197274   | 0.163312936  |
|               | 0.336245703  | 0.624497889  | 0.669887725  |              |              |              |
| TCGA-BR-6563B | 0.263327398  | -0.598085851 | -0.614233386 | -0.708041969 | 0.082347135  |              |
|               | 0.445578966  | 0.335543578  | -0.031382702 | 0.017057378  | 0.161436491  | 0.227859334  |
|               | 0.404082199  | 0.581939372  | 0.215337171  | 0.075125383  | -0.143216787 | 0.265801149  |
|               | 0.188886197  | 0.166387983  | 0.719286404  | -0.020415519 | -0.093984135 | 0.3012214    |
|               | 0.129712625  | 0.648836532  | 0.564858825  |              |              |              |
| TCGA-BR-6564B | 0.438405792  | -0.569547289 | -0.585792578 | -0.669315031 | 0.2422378    |              |
|               | 0.25914651   | 0.21508868   | -0.14161646  | 0.125371616  | 0.248304533  | 0.277131028  |
|               | 0.301834042  | 0.444992382  | 0.172396849  | 0.103722448  | -0.235243954 | 0.096389306  |
|               | 0.053319553  | 0.14989181   | 0.521925747  | 0.034983054  | 0.098127664  | 0.368709011  |
|               | 0.09531553   | 0.482229812  | 0.373710009  |              |              |              |
| TCGA-BR-6565B | 0.020333195  | 0.583202728  | 0.278080886  | 0.639367284  | 0.096796808  |              |
|               | -0.058165015 | 0.158959091  | 0.06624431   | 0.188710399  | 0.0000703    | 0.140556238  |

|               |              |              |              |              |              |              |
|---------------|--------------|--------------|--------------|--------------|--------------|--------------|
|               | -0.118084553 | 0.315056927  | 0.49887087   | 0.228674936  | 0.268940019  | 0.089743089  |
|               | 0.324509373  | 0.31551563   | 0.297587299  | 0.065433465  | -0.028906274 | 0.031139672  |
|               | -0.172149396 | 0.50074658   | 0.483485306  |              |              |              |
| TCGA-BR-6705B | 0.191923811  | -0.267908614 | -0.4760091   | -0.579363561 | 0.234112338  |              |
|               | 0.184510735  | 0.006564142  | -0.05999852  | 0.164238409  | 0.339524185  | 0.397539063  |
|               | 0.570378555  | 0.332303201  | -0.233704484 | 0.025192299  | -0.206103619 | -0.070985731 |
|               | -0.034995444 | -0.013558364 | -0.046048671 | 0.151373174  | 0.244687402  | 0.421012785  |
|               | 0.294215797  | -0.113236853 | -0.256461581 |              |              |              |
| TCGA-BR-6707A | -0.092618181 | 0.468934503  | 0.349685736  | 0.448591543  | -0.18074339  |              |
|               | 0.241508046  | 0.162665524  | -0.023340722 | -0.29928003  | -0.23124678  | -0.329083206 |
|               | -0.257384876 | 0.203285159  | 0.475553921  | -0.029644415 | -0.119261571 | 0.202017637  |
|               | 0.059406717  | -0.062376287 | 0.475640277  | -0.150020581 | -0.179962571 | -0.141208999 |
|               | 0.055994502  | 0.617131449  | 0.596627461  |              |              |              |
| TCGA-BR-6709B | -0.271434002 | -0.142908414 | 0.092797161  | -0.162440522 | 0.048370068  |              |
|               | 0.354728972  | 0.349763967  | 0.178691013  | 0.095211246  | 0.034338918  | 0.258817346  |
|               | 0.270561041  | 0.349858619  | 0.540622509  | 0.325880516  | 0.290181008  | 0.452785495  |
|               | 0.3571068    | 0.279695485  | 0.543052646  | 0.166699116  | 0.214811013  | 0.078223701  |
|               | 0.208804233  | 0.655086891  | 0.630248749  |              |              |              |
| TCGA-BR-6801A | 0.110677843  | -0.188192845 | -0.400363282 | -0.420119649 | -0.112455821 |              |
|               | -0.03210288  | -0.246120802 | -0.233656424 | 0.085545918  | 0.081076387  | 0.183666389  |
|               | 0.34272945   | -0.050983884 | -0.085219562 | -0.147165309 | -0.26152283  | -0.045030183 |
|               | -0.314616248 | -0.255800009 | -0.305743936 | -0.022927788 | -0.118360541 | 0.341843878  |
|               | 0.104557764  | -0.314621546 | -0.330926845 |              |              |              |
| TCGA-BR-6802A | 0.271742158  | 0.037888023  | -0.155770758 | -0.340932132 | -0.23015623  |              |
|               | 0.315402153  | 0.004451929  | -0.133080245 | -0.309121333 | -0.088276978 | -0.298772219 |
|               | -0.266013957 | 0.305493273  | 0.454233612  | -0.061130991 | -0.138321389 | 0.257597664  |
|               | -0.138921409 | -0.233077528 | 0.521799213  | -0.270973674 | -0.363904563 | -0.268268764 |
|               | -0.178941731 | 0.621823572  | 0.651063705  |              |              |              |
| TCGA-BR-6803B | 0.057417991  | -0.446450167 | -0.481621965 | -0.57191074  | 0.215113703  |              |
|               | 0.270741267  | 0.205038177  | -0.146681437 | 0.156443389  | 0.282389654  | 0.304813227  |
|               | 0.359402376  | 0.390020267  | 0.108840941  | 0.059613195  | -0.180594889 | 0.021496126  |
|               | 0.064556827  | 0.05004236   | 0.459540129  | 0.135345362  | 0.129885112  | 0.372918881  |
|               | 0.218524784  | 0.358237155  | 0.329771695  |              |              |              |
| TCGA-BR-6852A | 0.204790075  | 0.034089804  | -0.40402282  | -0.475295817 | -0.002894338 |              |
|               | 0.476266669  | 0.365926971  | 0.252790931  | -0.275246904 | -0.118164506 | -0.19930781  |
|               | -0.172789906 | 0.398665174  | 0.586748098  | 0.447333595  | 0.318247304  | 0.523167807  |
|               | 0.30302287   | 0.270219427  | 0.665485731  | -0.083675329 | -0.107552853 | -0.265029648 |
|               | 0.098195517  | 0.727624899  | 0.734300499  |              |              |              |
| TCGA-BR-7196B | 0.115793069  | -0.023738561 | 0.060038067  | -0.070638037 | 0.303042202  |              |
|               | 0.334121781  | 0.343328514  | 0.336069081  | 0.192712529  | 0.36334753   | 0.401228972  |
|               | 0.515861145  | 0.455221423  | 0.403441052  | 0.340004443  | 0.335645168  | 0.301008258  |
|               | 0.326085653  | 0.316801902  | 0.450275135  | 0.343572838  | 0.303310617  | 0.367057952  |
|               | 0.341819244  | 0.573190172  | 0.570350767  |              |              |              |
| TCGA-BR-7197A | -0.103374215 | 0.010705296  | 0.143230687  | 0.222305876  | -0.104919539 |              |

|               |              |              |              |              |              |              |
|---------------|--------------|--------------|--------------|--------------|--------------|--------------|
|               | -0.451465202 | -0.40667206  | -0.248824905 | 0.191628115  | -0.029257419 | -0.119822071 |
|               | -0.123738293 | -0.372404845 | -0.546577685 | -0.412208688 | -0.478863419 | -0.399463312 |
|               | -0.38142251  | -0.256756418 | -0.628672343 | -0.093535838 | -0.072800404 | 0.233119423  |
|               | -0.010378696 | -0.714878855 | -0.774564606 |              |              |              |
| TCGA-BR-7704B | 0.258739423  | -0.139915815 | -0.053715041 | -0.552371167 | 0.185384467  |              |
|               | 0.135404376  | 0.057274426  | -0.092791582 | 0.014693902  | -0.053609123 | -0.06566628  |
|               | -0.141746256 | 0.246616881  | 0.238026933  | -0.002592604 | -0.033948996 | 0.024651156  |
|               | 0.027759839  | -0.16102245  | 0.425237849  | -0.158684051 | -0.19357443  | 0.112061987  |
|               | -0.171314588 | 0.488343496  | 0.392933736  |              |              |              |
| TCGA-BR-7707A | -0.20864326  | 0.628402193  | 0.49955603   | 0.434133186  | -0.036873465 |              |
|               | 0.108152003  | 0.132841374  | 0.281482981  | -0.071219666 | -0.114292594 | 0.000872975  |
|               | 0.002780665  | -0.188338818 | 0.370424485  | 0.031231501  | 0.214025282  | 0.269933765  |
|               | -0.00572347  | -0.076301026 | -0.256939356 | 0.044218157  | -0.064727899 | -0.105811725 |
|               | -0.053545041 | -0.058747538 | 0.354442079  |              |              |              |
| TCGA-BR-7715A | 0.115005064  | -0.313261725 | -0.366856378 | -0.34032053  | -0.001311986 |              |
|               | 0.269149716  | 0.069143833  | -0.290636146 | -0.198085203 | -0.062049995 | -0.282270243 |
|               | -0.151480512 | 0.24309007   | -0.13220925  | -0.066080147 | -0.182994659 | 0.029888044  |
|               | -0.10688144  | -0.023083144 | 0.36586924   | -0.157333767 | -0.272601108 | 0.100542492  |
|               | 0.108485159  | 0.364914951  | 0.208041792  |              |              |              |
| TCGA-BR-7716B | 0.353951655  | -0.013343729 | -0.355867656 | -0.236534065 | 0.134457214  |              |
|               | 0.206558811  | 0.283835133  | 0.253146024  | 0.034687056  | 0.031795116  | 0.005321907  |
|               | -0.235927762 | 0.373440864  | 0.356892697  | 0.282807937  | 0.097417382  | 0.210036956  |
|               | 0.303494577  | 0.254740601  | 0.510479298  | 0.112860132  | 0.016071948  | 0.068274024  |
|               | -0.020821622 | 0.539086171  | 0.456141681  |              |              |              |
| TCGA-BR-7717A | 0.192535131  | 0.117454308  | -0.310851584 | -0.346814675 | -0.006009947 |              |
|               | 0.338836114  | -0.007456751 | -0.312083628 | -0.203684157 | -0.160620666 | -0.189789144 |
|               | -0.14469599  | 0.31156889   | 0.216904611  | -0.165204278 | -0.099845667 | 0.09302448   |
|               | -0.244984986 | -0.044911551 | 0.487594739  | -0.230814524 | -0.19892156  | -0.196215051 |
|               | 0.091908746  | 0.413007365  | 0.436012762  |              |              |              |
| TCGA-BR-7722A | 0.121634517  | -0.213775645 | -0.388124067 | -0.48552663  | 0.005187258  |              |
|               | 0.071253108  | -0.114801113 | 0.011216231  | -0.13326407  | -0.19139863  | 0.052559567  |
|               | 0.171373082  | 0.089045042  | -0.171064482 | -0.196564502 | -0.222300439 | -0.195508859 |
|               | -0.085893141 | -0.081836981 | 0.373990877  | -0.113397253 | -0.302746707 | -0.025723831 |
|               | -0.193750557 | 0.395466286  | 0.253298106  |              |              |              |
| TCGA-BR-7723B | -0.140411403 | 0.322466469  | 0.218548754  | 0.340022528  | 0.068604549  |              |
|               | -0.229160664 | -0.08229418  | -0.342675167 | 0.251261116  | 0.304887408  | 0.026514498  |
|               | 0.045534052  | 0.013561932  | -0.088669598 | -0.217129879 | -0.334704233 | -0.143626875 |
|               | 0.170093035  | -0.098735867 | -0.310280513 | 0.140639947  | 0.218379824  | 0.271546447  |
|               | 0.291454222  | -0.416492865 | -0.38697927  |              |              |              |
| TCGA-BR-7901B | 0.288072364  | -0.296662305 | -0.383835513 | -0.413876964 | 0.216896659  |              |
|               | 0.319380425  | 0.228866983  | 0.143689834  | 0.137849249  | 0.193419125  | 0.360719447  |
|               | 0.428782847  | 0.387684755  | 0.056755205  | 0.211612238  | 0.205698079  | 0.104924644  |
|               | 0.077887796  | 0.160537189  | 0.203537486  | 0.156819151  | 0.022897179  | 0.125112775  |
|               | 0.049864099  | 0.26193842   | 0.286819835  |              |              |              |

|               |              |              |              |              |              |
|---------------|--------------|--------------|--------------|--------------|--------------|
| TCGA-BR-7957B | -0.147713909 | -0.242016309 | 0.192900362  | -0.085503675 | 0.217486335  |
|               | -0.118037825 | 0.035402629  | 0.179215869  | 0.316186052  | 0.400810088  |
|               | 0.424442646  | 0.156675303  | -0.388807703 | -0.044589182 | -0.091829527 |
|               | -0.024728389 | -0.015328409 | -0.430434143 | 0.362235496  | 0.442216689  |
|               | 0.410128669  | -0.567446916 | -0.568961563 |              |              |
| TCGA-BR-7958B | -0.313354217 | 0.211730053  | 0.360850381  | 0.566916372  | 0.088609811  |
|               | 0.460234089  | 0.449948649  | 0.286173539  | -0.074943569 | 0.169756808  |
|               | 0.227907479  | 0.462407327  | 0.6290306    | 0.437606716  | 0.443838547  |
|               | 0.458991571  | 0.360810864  | 0.625300494  | 0.267778382  | 0.305048023  |
|               | 0.176726986  | 0.74562344   | 0.75540481   |              | -0.180694995 |
| TCGA-BR-7959B | -0.035105076 | -0.413497624 | -0.216383127 | -0.424298834 | 0.258025463  |
|               | -0.061121854 | -0.144627043 | 0.087159637  | 0.334918864  | 0.49399375   |
|               | 0.386376815  | 0.205079601  | -0.389878085 | 0.143459269  | -0.2212763   |
|               | -0.117397163 | -0.038175979 | -0.403767597 | 0.291855386  | 0.230550579  |
|               | 0.330546165  | -0.4730032   | -0.496240743 |              | 0.362101437  |
| TCGA-BR-8058B | -0.022260512 | -0.060443562 | -0.139460827 | -0.082859499 | 0.049803141  |
|               | 0.390815529  | 0.353717193  | 0.434329851  | 0.090636949  | 0.23613287   |
|               | 0.283976205  | 0.480359909  | 0.417120072  | 0.376386403  | 0.145542501  |
|               | 0.43196988   | 0.457828484  | 0.635648346  | 0.274813735  | 0.238633347  |
|               | 0.22172862   | 0.571390654  | 0.507410125  |              | 0.191300202  |
| TCGA-BR-8059B | -0.077495485 | -0.286541604 | -0.064836244 | -0.105194119 | 0.050598752  |
|               | -0.012210222 | -0.202136253 | 0.045043085  | 0.126023775  | 0.218394574  |
|               | 0.569861349  | -0.140718001 | -0.503675024 | -0.179752635 | -0.157531135 |
|               | -0.341408387 | -0.296958874 | -0.371076437 | 0.158582838  | 0.029062716  |
|               | 0.246255142  | -0.583647506 | -0.493034545 |              | 0.111728556  |
| TCGA-BR-8060B | 0.123781013  | -0.582049888 | -0.554032052 | -0.611607362 | 0.174203123  |
|               | 0.203752632  | 0.103479303  | -0.321727045 | 0.021601761  | 0.164369601  |
|               | 0.101957855  | 0.07640281   | -0.01961433  | -0.047486904 | -0.10848656  |
|               | -0.139973754 | -0.134040578 | 0.127365628  | -0.068329194 | -0.055885604 |
|               | 0.214456397  | 0.009062495  | 0.076006468  |              | 0.102183861  |
| TCGA-BR-8077A | 0.233721987  | -0.049449549 | -0.176439867 | -0.224470869 | -0.186195259 |
|               | 0.327032414  | 0.139433581  | -0.343147418 | -0.267006451 | -0.136059249 |
|               | -0.194051418 | 0.242852528  | 0.192216411  | -0.006711381 | 0.135434167  |
|               | -0.029158113 | -0.251473144 | 0.406617838  | -0.176495216 | -0.403473304 |
|               | -0.05135068  | 0.45791807   | 0.449666031  |              | -0.087094803 |
| TCGA-BR-8080B | -0.233388543 | -0.190839863 | -0.178914685 | -0.064596249 | 0.174098443  |
|               | 0.335447616  | 0.313891441  | 0.150482555  | 0.225319531  | 0.315168825  |
|               | 0.371435395  | 0.396044365  | 0.038716862  | 0.165973255  | 0.265176144  |
|               | 0.195373502  | 0.289053203  | 0.294987871  | 0.221907366  | 0.0985517    |
|               | 0.206513054  | 0.067171978  | 0.232182564  |              | 0.224970688  |
| TCGA-BR-8081B | 0.278717628  | 0.246578297  | 0.158687009  | 0.142271156  | 0.183694473  |
|               | 0.421918248  | 0.320924338  | 0.336536993  | -0.100971726 | 0.120438311  |
|               | 0.137324198  | 0.395626558  | 0.475248414  | 0.490608725  | 0.412601481  |
|               | 0.41860632   | 0.470506103  | 0.646998417  | 0.132183331  | 0.193234156  |
|               |              |              |              |              | -0.241495568 |

|               |              |              |              |              |              |              |
|---------------|--------------|--------------|--------------|--------------|--------------|--------------|
|               | 0.282240165  | 0.574458464  | 0.556549165  |              |              |              |
| TCGA-BR-8284B | -0.200858648 | 0.099397786  | 0.141256727  | 0.133865358  | 0.040782655  |              |
|               | 0.276755578  | 0.319845789  | 0.358434891  | -0.003449954 | 0.239389207  | 0.221972975  |
|               | 0.161625102  | 0.285787619  | 0.379790649  | 0.298013405  | 0.086217422  | 0.358028161  |
|               | 0.388311529  | 0.270105283  | 0.45277729   | 0.145432055  | 0.110263908  | -0.118499143 |
|               | 0.277528699  | 0.23740729   | 0.258294103  |              |              |              |
| TCGA-BR-8286B | -0.114191662 | 0.389744977  | 0.409621781  | 0.584285756  | -0.1321248   |              |
|               | -0.055955007 | -0.146075406 | 0.188514799  | -0.127463554 | -0.10900891  | -0.15181315  |
|               | -0.106089324 | -0.05641741  | -0.043701094 | -0.024072382 | -0.060664191 | 0.069922658  |
|               | -0.191336945 | -0.25507491  | -0.41859868  | 0.040261169  | -0.038398941 | -0.213208747 |
|               | 0.244320876  | -0.22105571  | -0.218303053 |              |              |              |
| TCGA-BR-8289B | 0.014802768  | 0.116946671  | 0.112587713  | -0.355067376 | -0.141623397 |              |
|               | -0.386401427 | -0.404160812 | -0.225145784 | -0.029249843 | -0.125886528 | -0.183552158 |
|               | -0.059162999 | -0.371852239 | -0.329555778 | -0.34815937  | -0.44165141  | -0.391470119 |
|               | -0.388965611 | -0.283656772 | -0.579526215 | -0.154344164 | -0.130256527 | -0.20624345  |
|               | 0.023891687  | -0.671001181 | -0.687425466 |              |              |              |
| TCGA-BR-8291B | 0.155332365  | -0.466930086 | -0.361654769 | -0.574049084 | 0.196901427  |              |
|               | 0.261344769  | 0.211801902  | 0.188133885  | 0.124385181  | 0.19137065   | 0.369317889  |
|               | 0.43117621   | 0.39613269   | 0.06946035   | 0.127103228  | 0.19480338   | 0.242095675  |
|               | 0.275260041  | 0.280843032  | 0.45409607   | 0.243085178  | 0.247699248  | 0.231559702  |
|               | 0.239211639  | 0.18076369   | 0.183858061  |              |              |              |
| TCGA-BR-8295A | 0.067112275  | 0.081879194  | 0.138443431  | 0.351820014  | -0.254207142 |              |
|               | -0.390702193 | -0.481917723 | -0.48368855  | -0.170967559 | -0.078725623 | -0.350759965 |
|               | -0.295183301 | -0.43125444  | -0.377453545 | -0.4533525   | -0.570557743 | -0.363005621 |
|               | -0.477181599 | -0.434036606 | -0.556396256 | -0.274227573 | -0.244916805 | -0.123436583 |
|               | -0.223595494 | -0.694920097 | -0.69322284  |              |              |              |
| TCGA-BR-8296B | -0.411887481 | -0.325250844 | -0.388068549 | -0.306390413 | -0.040501657 |              |
|               | 0.172656937  | 0.028608444  | 0.022020577  | -0.230759221 | -0.258403689 | -0.091439721 |
|               | 0.122122916  | 0.262135084  | 0.010502156  | 0.104053792  | -0.24113293  | 0.164706933  |
|               | 0.122880225  | 0.230135927  | 0.407043366  | -0.066258207 | -0.146700304 | -0.137289215 |
|               | 0.037139279  | 0.319339963  | 0.241939516  |              |              |              |
| TCGA-BR-8297B | -0.081953804 | -0.376098096 | -0.067274209 | -0.22135323  | 0.116058622  |              |
|               | -0.242672224 | -0.126563595 | -0.142045151 | 0.183290971  | 0.307161263  | 0.237621719  |
|               | 0.138381791  | 0.016700805  | -0.383297513 | -0.252471103 | -0.403697718 | -0.286759456 |
|               | -0.296174214 | -0.16833512  | -0.241727962 | 0.039219268  | 0.190286286  | 0.105865658  |
|               | 0.23994074   | -0.413228295 | -0.496725123 |              |              |              |
| TCGA-BR-8361A | -0.374091279 | 0.463871255  | 0.327398185  | 0.342544419  | -0.143785575 |              |
|               | -0.14906373  | -0.00986717  | 0.158865409  | -0.009907479 | -0.106338514 | -0.14941711  |
|               | -0.392355278 | -0.200345144 | 0.438033952  | 0.080510752  | 0.043221244  | 0.186970648  |
|               | 0.23207102   | 0.128270394  | 0.060392368  | -0.030490226 | -0.119143763 | -0.201579522 |
|               | 0.001099418  | 0.18027933   | 0.261784203  |              |              |              |
| TCGA-BR-8364B | -0.11584701  | -0.602461602 | -0.390121757 | -0.569092386 | 0.287659008  |              |
|               | 0.062120558  | 0.124648021  | 0.239226587  | 0.308965883  | 0.410867208  | 0.464208936  |
|               | 0.482822395  | 0.383116597  | -0.297918035 | 0.184105674  | 0.017501996  | 0.052014218  |

|               |              |              |              |              |              |              |
|---------------|--------------|--------------|--------------|--------------|--------------|--------------|
|               | 0.232031066  | 0.296832982  | 0.01511463   | 0.225279368  | 0.238783245  | 0.355119111  |
|               | 0.267778501  | -0.155653027 | -0.205505143 |              |              |              |
| TCGA-BR-8365B | -0.134428894 | -0.590294173 | -0.344416613 | -0.604861544 | 0.306313324  |              |
|               | 0.039408004  | 0.072626864  | 0.046928122  | 0.334910241  | 0.331586137  | 0.37896207   |
|               | 0.239847687  | 0.142199393  | -0.330627832 | 0.087647861  | -0.183710734 | -0.132842742 |
|               | 0.101683662  | 0.042532507  | 0.142163323  | 0.222934887  | 0.235492682  | 0.418857967  |
|               | 0.311277189  | -0.097536659 | -0.242441798 |              |              |              |
| TCGA-BR-8366B | -0.13547967  | -0.366103536 | -0.017114905 | -0.226975332 | 0.165894032  |              |
|               | 0.474724833  | 0.390812466  | 0.265448178  | 0.047329538  | 0.183091365  | 0.322536172  |
|               | 0.48999094   | 0.474108772  | 0.495266548  | 0.461310873  | 0.214282091  | 0.520977384  |
|               | 0.430149069  | 0.343755637  | 0.614222518  | 0.236390308  | 0.106349957  | 0.133963542  |
|               | 0.279474278  | 0.66210006   | 0.704795777  |              |              |              |
| TCGA-BR-8367B | 0.185086826  | -0.419200985 | -0.305763399 | -0.388510207 | 0.131652677  |              |
|               | -0.301682301 | -0.079697883 | 0.174588362  | 0.271758873  | 0.332295364  | 0.287034902  |
|               | 0.128930008  | -0.108051418 | -0.418792656 | -0.130547596 | -0.310484569 | -0.210800139 |
|               | -0.055107498 | 0.011571723  | -0.357818363 | 0.198282147  | 0.311640048  | 0.325098116  |
|               | 0.290277797  | -0.552801277 | -0.587909349 |              |              |              |
| TCGA-BR-8368A | 0.029232618  | 0.492477941  | 0.282857284  | 0.231116521  | -0.158052774 |              |
|               | -0.243072815 | -0.115394859 | -0.02748978  | -0.210235536 | -0.254613205 | -0.361052241 |
|               | -0.515421786 | -0.392532115 | 0.022644957  | -0.170439007 | -0.119004917 | 0.087326761  |
|               | 0.048415052  | -0.098198204 | -0.228387104 | -0.193641205 | -0.249007977 | -0.327980076 |
|               | -0.219751993 | -0.1846141   | -0.226853481 |              |              |              |
| TCGA-BR-8369B | 0.166189292  | -0.413665494 | -0.229229554 | -0.512301272 | -0.027941516 |              |
|               | -0.366281932 | -0.396273082 | -0.241374064 | -0.02131098  | -0.106137782 | 0.101017421  |
|               | 0.14168036   | -0.375993519 | -0.470809367 | -0.235585222 | -0.368000996 | -0.318900572 |
|               | -0.303888437 | -0.231079677 | -0.521367589 | -0.202008901 | -0.156753762 | -0.199407188 |
|               | -0.071417984 | -0.684853577 | -0.753801761 |              |              |              |
| TCGA-BR-8371B | -0.082217472 | -0.517837092 | -0.258258017 | -0.48897556  | 0.054460268  |              |
|               | -0.123241361 | -0.016379444 | -0.254576915 | 0.009253508  | -0.031835547 | 0.130908859  |
|               | 0.066491934  | 0.117844713  | -0.413141876 | -0.296810474 | -0.372448983 | -0.298682521 |
|               | -0.125616031 | 0.055233665  | 0.231885624  | -0.16757573  | -0.074808145 | -0.043942632 |
|               | 0.073320944  | -0.074599894 | -0.400544557 |              |              |              |
| TCGA-BR-8372A | -0.064262337 | 0.550681825  | 0.466555399  | 0.382657314  | -0.185383674 |              |
|               | 0.025116928  | -0.133937702 | 0.220059736  | -0.215952507 | -0.167919421 | -0.385915524 |
|               | -0.591225541 | -0.028372462 | 0.504186062  | 0.256517127  | 0.1898747    | 0.217980309  |
|               | 0.072480544  | -0.030948306 | 0.356477145  | -0.221596686 | -0.232223014 | -0.399727394 |
|               | -0.20108977  | 0.572481903  | 0.578660854  |              |              |              |
| TCGA-BR-8373B | 0.211794205  | -0.387298578 | -0.239998634 | -0.429934687 | 0.275727021  |              |
|               | -0.153881799 | 0.067643689  | 0.343649874  | 0.350806589  | 0.375500186  | 0.207670882  |
|               | 0.223242075  | -0.077266597 | -0.446165095 | 0.104648049  | 0.119701788  | -0.13970691  |
|               | 0.274519993  | 0.237921666  | -0.490199539 | 0.323554117  | 0.279210747  | 0.384382227  |
|               | 0.283586908  | -0.557378817 | -0.584471454 |              |              |              |
| TCGA-BR-8380B | 0.185462253  | -0.414414181 | -0.158894436 | -0.360205459 | 0.236367389  |              |
|               | -0.299936946 | -0.099155696 | -0.027547875 | 0.294995559  | 0.244184284  | 0.339136705  |

|               |              |              |              |              |              |              |
|---------------|--------------|--------------|--------------|--------------|--------------|--------------|
|               | 0.329072111  | 0.058543742  | -0.443603006 | -0.126473123 | -0.311217155 | -0.321016725 |
|               | -0.070466966 | -0.036754246 | -0.29717826  | 0.147126567  | 0.314267604  | 0.296602871  |
|               | 0.219488104  | -0.538140119 | -0.565933535 |              |              |              |
| TCGA-BR-8381B | -0.250343267 | -0.112547513 | 0.018621445  | 0.420001442  | -0.120181755 |              |
|               | 0.392176802  | 0.256224074  | 0.113092811  | -0.128562615 | 0.024330681  | -0.151231317 |
|               | 0.031143826  | 0.356655398  | 0.53010055   | 0.286378976  | 0.237473639  | 0.314398088  |
|               | 0.189493748  | 0.154831485  | 0.524805667  | 0.028563127  | -0.127431045 | -0.009727051 |
|               | 0.037261924  | 0.667885946  | 0.68361033   |              |              |              |
| TCGA-BR-8382B | -0.229052757 | 0.050503461  | -0.136982745 | -0.313990744 | -0.011867763 |              |
|               | 0.259975793  | 0.169432752  | 0.246255506  | 0.045989123  | 0.036774813  | 0.136514859  |
|               | 0.255234946  | 0.276028877  | 0.543352882  | 0.241027281  | 0.322526983  | 0.368187928  |
|               | -0.133311721 | -0.082664419 | 0.314104599  | 0.059229978  | -0.202545723 | 0.091085353  |
|               | -0.146505761 | 0.621568905  | 0.702244239  |              |              |              |
| TCGA-BR-8384B | -0.045628922 | -0.590978359 | -0.364933553 | -0.615124141 | 0.292271255  |              |
|               | 0.014063333  | 0.14645609   | 0.15776512   | 0.335858175  | 0.366758728  | 0.387038714  |
|               | 0.344664849  | 0.270271138  | -0.348466732 | 0.053696052  | -0.14486502  | 0.003842205  |
|               | 0.182708685  | 0.168085711  | -0.049255583 | 0.18903758   | 0.257167333  | 0.352765346  |
|               | 0.208211903  | -0.12106096  | -0.334695619 |              |              |              |
| TCGA-BR-8483A | -0.131396308 | 0.197846344  | -0.16261519  | 0.135433418  | -0.147888187 |              |
|               | -0.333910202 | -0.413415164 | -0.385589713 | -0.006209425 | -0.21816742  | -0.280325802 |
|               | -0.191547048 | -0.377620834 | -0.355834901 | -0.365529185 | -0.329576986 | -0.376851122 |
|               | -0.44120218  | -0.459298427 | -0.523162685 | -0.219990305 | -0.338630558 | 0.188138047  |
|               | -0.297302184 | -0.556901077 | -0.513628997 |              |              |              |
| TCGA-BR-8484B | 0.036978815  | 0.025350845  | 0.061851912  | 0.124763124  | 0.082049847  |              |
|               | 0.18951747   | 0.301244616  | 0.343853982  | 0.081730146  | -0.083597975 | -0.145072701 |
|               | -0.30702855  | 0.284800764  | 0.379238233  | 0.3439646    | 0.255934157  | 0.236131961  |
|               | 0.461415477  | 0.331801812  | 0.532816538  | 0.108900246  | 0.134070695  | -0.038644693 |
|               | 0.02051924   | 0.575221281  | 0.480512779  |              |              |              |
| TCGA-BR-8485B | 0.176714268  | -0.162135835 | -0.150147786 | -0.179931062 | 0.074772905  |              |
|               | -0.098029643 | 0.030388907  | -0.047951482 | 0.24091648   | 0.328072196  | 0.2422487    |
|               | 0.230863084  | 0.172717519  | -0.107128821 | -0.063886292 | 0.102787925  | 0.010730522  |
|               | 0.300345763  | 0.142128474  | -0.226539653 | 0.180000309  | 0.289546874  | 0.282542421  |
|               | 0.092985313  | -0.309515315 | -0.070618197 |              |              |              |
| TCGA-BR-8486B | 0.289876975  | -0.171484169 | -0.270438785 | 0.233060791  | 0.124254483  |              |
|               | 0.246733168  | 0.248726357  | 0.231783274  | 0.100748015  | 0.014962165  | 0.299262958  |
|               | 0.225875674  | 0.316086855  | -0.157979501 | 0.099767977  | 0.023696845  | 0.160994849  |
|               | 0.246951594  | 0.281854579  | 0.322033574  | 0.119986997  | 0.092714165  | 0.18754991   |
|               | 0.007462835  | 0.284606673  | 0.13931967   |              |              |              |
| TCGA-BR-8487A | -0.0154589   | 0.229017546  | 0.212560752  | 0.317976405  | -0.279932728 |              |
|               | 0.009309072  | -0.163210576 | -0.055361198 | -0.356983112 | -0.335624721 | -0.340285067 |
|               | -0.304249937 | -0.163191302 | 0.238599489  | -0.024249432 | -0.021262351 | 0.07582722   |
|               | -0.270175325 | -0.214436408 | 0.373948928  | -0.328925219 | -0.403358063 | -0.445455137 |
|               | -0.270295591 | 0.463815728  | 0.495463933  |              |              |              |
| TCGA-BR-8588B | 0.061834877  | -0.326365111 | -0.235228069 | -0.144217269 | 0.054075091  |              |

|               |              |              |              |              |              |              |
|---------------|--------------|--------------|--------------|--------------|--------------|--------------|
|               | 0.295082744  | 0.34590922   | 0.078747258  | 0.115937308  | 0.172046293  | 0.297901077  |
|               | 0.3748659    | 0.410765621  | 0.302236019  | 0.049803315  | 0.224536643  | 0.225384561  |
|               | 0.083452836  | 0.255226503  | 0.408357595  | 0.110814448  | 0.129516198  | 0.189141343  |
|               | 0.092881662  | 0.353076481  | 0.364274548  |              |              |              |
| TCGA-BR-8589A | -0.087197465 | 0.31072398   | 0.463058234  | 0.603145552  | -0.149060556 |              |
|               | 0.150074362  | 0.208309751  | 0.316429637  | -0.184418236 | -0.198276024 | -0.371226848 |
|               | -0.585576593 | 0.056697431  | 0.576058199  | 0.389287802  | 0.294213793  | 0.388610131  |
|               | 0.347718016  | 0.192592809  | 0.453821817  | -0.108296784 | 0.0386363    | -0.322824107 |
|               | -0.094393482 | 0.58386785   | 0.591199083  |              |              |              |
| TCGA-BR-8590B | 0.219459129  | -0.33397575  | -0.319514602 | -0.398021391 | 0.097051371  |              |
|               | -0.058015859 | 0.039642363  | 0.206751343  | 0.223063898  | 0.236610478  | 0.300812792  |
|               | 0.403509026  | 0.314682105  | -0.196498128 | 0.122467363  | -0.118284063 | -0.064577031 |
|               | 0.186383325  | 0.27745698   | 0.01879239   | 0.23442774   | 0.069833844  | 0.336205444  |
|               | 0.164518518  | -0.207015438 | -0.338289042 |              |              |              |
| TCGA-BR-8591B | -0.071264875 | 0.317950665  | 0.331318343  | 0.191164555  | -0.023903545 |              |
|               | 0.153323136  | 0.187796994  | 0.426404973  | -0.011904627 | 0.208058102  | 0.177984121  |
|               | 0.180096219  | 0.044151166  | 0.295448703  | 0.265176652  | 0.323556113  | 0.308488904  |
|               | 0.219234801  | 0.254407227  | 0.239170913  | 0.156271328  | 0.10727974   | -0.196422778 |
|               | 0.059773207  | 0.326902718  | 0.465673146  |              |              |              |
| TCGA-BR-8592B | 0.356598163  | -0.571219082 | -0.408593284 | -0.574033718 | 0.292945958  |              |
|               | 0.002138633  | 0.106619368  | -0.025265089 | 0.25230569   | 0.297201875  | 0.340901451  |
|               | 0.280198518  | 0.198380596  | -0.395439364 | -0.041030024 | -0.279333242 | -0.087068835 |
|               | 0.102504927  | 0.263930095  | 0.123149449  | 0.15049963   | 0.310706069  | 0.384622304  |
|               | 0.238055442  | -0.286270002 | -0.380485554 |              |              |              |
| TCGA-BR-8677B | 0.063409046  | -0.123998571 | 0.152432069  | -0.035423194 | 0.19738059   |              |
|               | 0.29787602   | 0.242026275  | 0.391967908  | 0.017872348  | 0.235454879  | 0.311595794  |
|               | 0.226222417  | 0.349018424  | 0.313746208  | 0.289721388  | 0.395268397  | 0.281691074  |
|               | 0.291577931  | 0.122731616  | 0.275453103  | 0.142214129  | 0.169205415  | 0.026484722  |
|               | 0.234771988  | 0.478177314  | 0.42937901   |              |              |              |
| TCGA-BR-8678B | -0.434532607 | 0.420157182  | 0.485075383  | 0.410405333  | 0.008676572  |              |
|               | -0.407489225 | -0.227356097 | -0.180984999 | 0.282790576  | 0.294558767  | -0.116577071 |
|               | -0.263467841 | -0.430486904 | -0.198401104 | -0.07646418  | -0.178864623 | -0.113711855 |
|               | 0.012450589  | -0.151097123 | -0.605619844 | 0.109732233  | 0.306377032  | 0.11699141   |
|               | 0.268515796  | -0.521830558 | -0.495500557 |              |              |              |
| TCGA-BR-8680A | 0.000297983  | 0.444633657  | 0.42994534   | 0.566710491  | -0.196929288 |              |
|               | -0.495663081 | -0.380343411 | -0.088528599 | 0.060616667  | -0.158690592 | -0.228551176 |
|               | -0.37072255  | -0.592581819 | -0.442955589 | -0.201795899 | -0.424848212 | -0.282929925 |
|               | -0.286812915 | -0.052517427 | -0.693299246 | -0.126056549 | -0.109079551 | 0.009559128  |
|               | -0.138472238 | -0.748484524 | -0.726491717 |              |              |              |
| TCGA-BR-8682B | 0.313728707  | -0.531367779 | -0.537261661 | -0.672800641 | 0.269336835  |              |
|               | 0.026023921  | 0.189208657  | 0.218392565  | 0.241533513  | 0.296752505  | 0.360692271  |
|               | 0.293710407  | 0.251634719  | -0.249546174 | 0.117709603  | -0.055121177 | 0.168200063  |
|               | 0.229422686  | 0.326242192  | -0.057511467 | 0.20384064   | 0.360990689  | 0.143231064  |
|               | 0.227044525  | -0.184693588 | -0.2915819   |              |              |              |

|                |              |              |              |              |              |
|----------------|--------------|--------------|--------------|--------------|--------------|
| TCGA-BR-8683B  | -0.234466996 | -0.47971894  | -0.163290777 | -0.221659989 | 0.222282627  |
|                | -0.097545192 | 0.062159786  | 0.243743225  | 0.288451819  | 0.314393537  |
|                | 0.213676809  | 0.058884108  | -0.224248101 | 0.080405203  | 0.175075225  |
|                | 0.351913874  | 0.294205847  | -0.335441557 | 0.230458522  | 0.358819125  |
|                | 0.19356713   | -0.131898417 | -0.330386755 |              | 0.161830768  |
| TCGA-BR-8686B  | -0.00681099  | -0.221410984 | 0.016670285  | 0.032002825  | 0.226397113  |
|                | 0.109687744  | 0.304629296  | 0.258144894  | 0.070565188  | -0.062867583 |
|                | 0.145783574  | 0.291635256  | 0.198080025  | 0.215620882  | 0.285905704  |
|                | 0.294190202  | 0.330696229  | 0.338863002  | 0.146355097  | 0.201548768  |
|                | 0.168405254  | 0.401353698  | 0.456637695  |              | 0.083775351  |
| TCGA-BR-8687B  | 0.050056457  | -0.352134742 | -0.488749667 | -0.444727684 | 0.051512806  |
|                | -0.305817218 | -0.301078497 | -0.097312008 | 0.137413719  | -0.023645541 |
|                | 0.02169374   | -0.303646711 | -0.309279458 | -0.353200963 | -0.322334994 |
|                | -0.29190257  | -0.323743225 | -0.409719941 | 0.030572351  | 0.019393667  |
|                | 0.289425039  | -0.503034958 | -0.492948218 |              | 0.23977975   |
| TCGA-BR-8690A  | 0.166620283  | -0.27483501  | -0.233682112 | -0.103842165 | -0.114567293 |
|                | 0.196557392  | -0.074713704 | -0.440393957 | -0.163216162 | -0.316770743 |
|                | -0.053630472 | 0.304668624  | 0.404736582  | -0.161540221 | -0.140741703 |
|                | -0.200579024 | -0.187214981 | 0.374995331  | -0.178975363 | -0.428028558 |
|                | -0.071492353 | 0.533099227  | 0.512267795  |              | 0.147250888  |
| TCGA-BR-A44TB  | -0.185987176 | -0.404414916 | -0.399431638 | -0.521039295 | 0.104503393  |
|                | 0.252612421  | 0.156915466  | -0.211331309 | -0.096686423 | -0.118759219 |
|                | -0.002730343 | 0.381483502  | 0.107176932  | 0.02805863   | -0.109904293 |
|                | 0.230032655  | 0.239653809  | 0.571838656  | -0.14508919  | -0.157891106 |
|                | -0.062278819 | 0.579299664  | 0.530325812  |              | 0.098534938  |
| TCGA-BR-A4CSA  | 0.076238353  | -0.061893084 | -0.22033183  | -0.087384358 | -0.235797725 |
|                | 0.15985311   | -0.183031854 | -0.25159054  | -0.265783257 | -0.281553739 |
|                | 0.228800435  | -0.074602287 | -0.220976975 | -0.176725831 | 0.072710876  |
|                | -0.417768658 | -0.414396472 | -0.221904534 | -0.301890291 | -0.262215806 |
|                | -0.121496682 | 0.102062005  | 0.179374123  |              | -0.115970438 |
| TCGA-BR-A4IV B | 0.059056493  | -0.644298964 | -0.380870959 | -0.60914971  | 0.248558939  |
|                | 0.13065224   | 0.093839094  | -0.158355964 | 0.13040231   | 0.320984922  |
|                | 0.415297832  | 0.039928795  | -0.360469109 | -0.137662122 | 0.023515055  |
|                | -0.190475469 | -0.161750467 | -0.160147855 | 0.053336297  | 0.068141578  |
|                | 0.155816099  | -0.40121848  | -0.320153612 |              | 0.106385955  |
| TCGA-BR-A4J4 A | -0.242365455 | -0.110196277 | 0.497566303  | 0.443867461  | 0.014709442  |
|                | 0.021187854  | -0.099907456 | 0.088884684  | -0.001401607 | 0.099213115  |
|                | 0.197310866  | 0.119341113  | 0.309294049  | 0.068815657  | -0.01764665  |
|                | -0.124455389 | 0.093972007  | -0.09988007  | 0.077342451  | 0.230214762  |
|                | 0.238900121  | 0.088850057  | 0.363978882  |              | -0.257875847 |
| TCGA-BR-A4J5 B | 0.060462129  | -0.564550245 | -0.431013516 | -0.556337184 | 0.067405704  |
|                | 0.228428488  | 0.148874819  | -0.092938315 | 0.179505953  | 0.313240671  |
|                | 0.556246318  | 0.27164355   | -0.333936514 | -0.238436029 | -0.044366101 |
|                | -0.177338738 | -0.071511533 | -0.026711169 | 0.064533946  | -0.034952146 |
|                |              |              |              |              | 0.395982845  |

|                |              |              |              |              |              |
|----------------|--------------|--------------|--------------|--------------|--------------|
|                | 0.037232014  | -0.309937419 | -0.352459187 |              |              |
| TCGA-BR-A4J6 A | -0.169038312 | -0.267590063 | -0.197851401 | -0.434905982 | -0.170172951 |
|                | -0.12122246  | -0.362933926 | -0.348320007 | -0.072940391 | -0.166824016 |
|                | -0.066694681 | -0.042910639 | -0.182622757 | -0.399474903 | -0.292469663 |
|                | -0.483609198 | -0.432243117 | -0.09264915  | -0.247201094 | -0.298911367 |
|                | 0.240628258  |              |              |              |              |
|                | -0.083852081 | -0.011160279 | -0.205716409 |              |              |
| TCGA-BR-A4J7 B | -0.270827433 | -0.567758926 | -0.445562113 | -0.617440333 | 0.006582144  |
|                | 0.207451818  | 0.09240899   | -0.171802428 | -0.018355965 | 0.087509661  |
|                | 0.012748163  |              |              |              |              |
|                | 0.113949165  | 0.320745223  | 0.142243376  | -0.051243125 | 0.036768167  |
|                | 0.185741768  |              |              |              |              |
|                | -0.058611609 | -0.258405608 | 0.405795791  | -0.170069702 | -0.286011501 |
|                | 0.168865614  |              |              |              |              |
|                | -0.064046802 | 0.55954877   | 0.559568041  |              |              |
| TCGA-BR-A4J8 B | 0.002161136  | -0.246500279 | -0.417377474 | -0.489825963 | -0.112549455 |
|                | -0.097349096 | -0.277709137 | -0.421596241 | -0.172546963 | 0.00516472   |
|                | -0.01820131  |              |              |              |              |
|                | 0.308641668  | 0.107525789  | -0.211205938 | -0.355474499 | -0.468916482 |
|                | -0.286670059 |              |              |              |              |
|                | -0.474504427 | -0.42571254  | -0.270080174 | -0.183645576 | -0.171075693 |
|                | 0.175900429  |              |              |              |              |
|                | -0.113371132 | 0.05780671   | -0.051130193 |              |              |
| TCGA-BR-A4J9 B | -0.184344354 | -0.621901961 | -0.403073134 | -0.624243114 | 0.174227174  |
|                | 0.002442831  | 0.045578956  | -0.301985594 | 0.075185275  | 0.165310343  |
|                | 0.285048198  |              |              |              |              |
|                | 0.338272993  | 0.176162568  | -0.429024871 | -0.216966207 | -0.329563305 |
|                | -0.267094351 |              |              |              |              |
|                | -0.148188281 | -0.088480143 | 0.184411583  | -0.057787121 | 0.063465564  |
|                | 0.175044364  |              |              |              |              |
|                | 0.080860489  | -0.268146889 | -0.366169704 |              |              |
| TCGA-BR-A4PFA  | -0.03662252  | 0.345116423  | 0.32673839   | 0.501230344  | -0.106866902 |
|                | -0.106755819 | 0.139351166  | 0.199636015  | -0.021391073 | -0.117731235 |
|                | -0.185926531 |              |              |              |              |
|                | -0.425030798 | -0.034241028 | 0.38867096   | 0.283817888  | 0.315779526  |
|                | 0.260993929  |              |              |              |              |
|                | 0.279778829  | 0.244343203  | 0.093155226  | 0.028437176  | 0.231605313  |
|                | -0.213034878 |              |              |              |              |
|                | -0.070984919 | 0.335699795  | 0.282760808  |              |              |
| TCGA-CD-5798B  | -0.155085215 | -0.32679674  | -0.403939184 | -0.577058547 | 0.151985816  |
|                | 0.258844503  | 0.204017571  | -0.042485442 | 0.167351988  | 0.285350802  |
|                | 0.418829477  |              |              |              |              |
|                | 0.552574692  | 0.385517288  | 0.000484293  | 0.09421069   | 0.016297887  |
|                | 0.050887177  |              |              |              |              |
|                | -0.174600024 | 0.014432899  | 0.164660568  | 0.128672618  | 0.033834218  |
|                | 0.123323879  |              |              |              |              |
|                | 0.222742336  | 0.254648288  | 0.229156083  |              |              |
| TCGA-CD-5799A  | 0.316245929  | 0.439191439  | 0.126452346  | 0.186277956  | -0.183089778 |
|                | -0.215632315 | -0.186041841 | -0.035161644 | -0.102865833 | -0.115641184 |
|                | -0.039474988 |              |              |              |              |
|                | 0.053738205  | -0.321722611 | -0.236978432 | -0.181657562 | -0.116438981 |
|                | -0.359241405 |              |              |              |              |
|                | -0.384118674 | -0.347384488 | -0.453759185 | -0.122921698 | -0.111433712 |
|                | -0.08311361  |              |              |              |              |
|                | -0.073234311 | -0.568038234 | -0.468054508 |              |              |
| TCGA-CD-5800A  | 0.192315397  | 0.351348835  | 0.152278049  | 0.23867582   | -0.240985082 |
|                | -0.337784947 | -0.269500921 | -0.459718816 | -0.222098661 | -0.326531847 |
|                | -0.295980438 |              |              |              |              |
|                | -0.273001647 | -0.311325483 | -0.189958396 | -0.380273307 | -0.434992254 |
|                | -0.361957889 |              |              |              |              |
|                | -0.373927838 | -0.333050087 | -0.409902534 | -0.242873513 | -0.333443713 |
|                | 0.071592028  |              |              |              |              |
|                | -0.333836208 | -0.387691623 | -0.487132455 |              |              |
| TCGA-CD-5801A  | -0.197967393 | 0.166679271  | 0.154432661  | 0.379260877  | -0.176676656 |
|                | 0.298830006  | 0.084945058  | 0.073476209  | -0.163978935 | -0.309766029 |
|                | -0.260345461 |              |              |              |              |
|                | -0.229699633 | 0.371461818  | 0.507159761  | 0.219579048  | -0.013151458 |
|                | 0.273334787  |              |              |              |              |

|               |              |              |              |              |              |              |
|---------------|--------------|--------------|--------------|--------------|--------------|--------------|
|               | 0.068208117  | -0.014621554 | 0.579727483  | -0.082623719 | -0.11933345  | 0.12878048   |
|               | 0.006400066  | 0.785774698  | 0.808973034  |              |              |              |
| TCGA-CD-5803B | -0.202227142 | -0.171866241 | -0.222112834 | -0.340259461 | 0.197124838  |              |
|               | 0.395601048  | 0.349135294  | 0.15671142   | 0.146852282  | 0.189251806  | 0.38225228   |
|               | 0.465476256  | 0.517117347  | 0.411304794  | 0.343974483  | 0.187889582  | 0.365366797  |
|               | 0.46884143   | 0.480150515  | 0.598998288  | 0.306630232  | 0.136763534  | 0.349434603  |
|               | 0.169637618  | 0.682450348  | 0.556822722  |              |              |              |
| TCGA-CD-5804B | 0.348124496  | 0.146003564  | -0.388018826 | -0.179021706 | -0.060601758 |              |
|               | 0.19697571   | 0.063780915  | -0.083898767 | -0.237064062 | -0.186016695 | 0.127788151  |
|               | 0.340473914  | 0.265635535  | 0.125775909  | -0.053343564 | -0.02946402  | -0.070779802 |
|               | -0.273127812 | -0.138194553 | 0.14468789   | -0.146782971 | -0.33970858  | 0.027543299  |
|               | -0.13391299  | 0.210246837  | 0.202040998  |              |              |              |
| TCGA-CD-5813B | 0.102457829  | -0.211513669 | -0.406773173 | -0.348619626 | 0.161698073  |              |
|               | 0.368194159  | 0.325144305  | -0.080379261 | 0.085517943  | 0.131337908  | 0.254300626  |
|               | 0.349407384  | 0.485797269  | 0.317330496  | 0.27929872   | 0.050434376  | 0.198531241  |
|               | 0.192666223  | 0.261447203  | 0.546458539  | 0.136890933  | 0.173193355  | 0.328083521  |
|               | 0.261393993  | 0.516162406  | 0.519714573  |              |              |              |
| TCGA-CD-8524B | -0.05115923  | -0.200124577 | -0.351296483 | -0.443867889 | -0.013146602 |              |
|               | -0.066588246 | -0.134019631 | -0.068366508 | 0.022036351  | 0.134327548  | 0.249596946  |
|               | 0.381644289  | -0.016531984 | -0.198779634 | -0.064936785 | -0.149800715 | -0.100596919 |
|               | -0.099904039 | -0.157407403 | -0.172693085 | 0.067353668  | -0.15882921  | 0.061547159  |
|               | -0.011073401 | -0.334159226 | -0.288816449 |              |              |              |
| TCGA-CD-8525A | -0.019777244 | 0.364288409  | -0.167467891 | -0.149576197 | -0.183364513 |              |
|               | 0.309546906  | 0.031401403  | -0.238162171 | -0.160481251 | -0.341450187 | -0.246173188 |
|               | 0.124266846  | 0.250057749  | 0.394268641  | -0.054653155 | 0.185118314  | 0.079421425  |
|               | -0.272764036 | -0.222374223 | 0.452633261  | -0.223720471 | -0.376714784 | 0.005954222  |
|               | -0.316021658 | 0.499036236  | 0.4869405    |              |              |              |
| TCGA-CD-8526B | -0.282494982 | 0.110502915  | 0.047744794  | 0.164261344  | -0.093954833 |              |
|               | -0.172638813 | -0.156760597 | -0.331146805 | -0.057433105 | -0.215403679 | -0.227888496 |
|               | -0.278548503 | -0.194435541 | -0.390758989 | -0.294144373 | -0.233181057 | -0.260002546 |
|               | -0.19593099  | -0.243765209 | -0.407382409 | -0.052636025 | -0.1592276   | 0.129701703  |
|               | 0.003328913  | -0.480116888 | -0.483362047 |              |              |              |
| TCGA-CD-8527A | -0.060370445 | 0.242294168  | -0.191986942 | -0.092904191 | -0.132300144 |              |
|               | -0.338906381 | -0.322933436 | -0.44586158  | -0.12510141  | -0.327054001 | -0.325317302 |
|               | -0.276457107 | -0.263343799 | 0.093717305  | -0.30292387  | -0.191014157 | -0.237313496 |
|               | -0.37719365  | -0.339171981 | -0.40113355  | -0.301782191 | -0.290877165 | -0.101372661 |
|               | -0.212600305 | -0.042993995 | -0.13260236  |              |              |              |
| TCGA-CD-8528A | 0.004110021  | 0.487665844  | 0.389339932  | 0.492459525  | -0.054216751 |              |
|               | -0.342840016 | -0.147488915 | 0.152626522  | 0.040670076  | -0.02496081  | 0.019899445  |
|               | -0.109365253 | -0.385783383 | -0.100759723 | 0.065819598  | -0.065239962 | -0.033275645 |
|               | -0.005495739 | 0.021183443  | -0.535305282 | 0.042925546  | -0.00800085  | -0.110267061 |
|               | -0.026841814 | -0.587596961 | -0.491736993 |              |              |              |
| TCGA-CD-8529B | 0.188295596  | -0.301150423 | -0.364845237 | -0.435603985 | 0.192165673  |              |
|               | 0.370141208  | 0.406625014  | 0.299664729  | 0.061816806  | 0.151152325  | 0.284729634  |

|               |              |              |              |              |              |              |
|---------------|--------------|--------------|--------------|--------------|--------------|--------------|
|               | 0.348824519  | 0.507795164  | 0.451889227  | 0.314950541  | 0.29255629   | 0.422632625  |
|               | 0.380676939  | 0.516574258  | 0.572371958  | 0.162112982  | 0.270791425  | 0.187968736  |
|               | 0.086862406  | 0.519365677  | 0.470182058  |              |              |              |
| TCGA-CD-8530B | -0.054917936 | -0.444904592 | -0.468861694 | -0.482170232 | 0.065272767  |              |
|               | 0.153676155  | 0.005219282  | -0.087475529 | -0.042049709 | 0.229238886  | 0.233816776  |
|               | 0.35682339   | 0.080202134  | -0.372630171 | -0.105132052 | -0.056967183 | -0.059956457 |
|               | -0.271751655 | -0.183600824 | -0.251891624 | 0.013472641  | -0.124867043 | 0.229529552  |
|               | 0.130528368  | -0.484289264 | -0.49506652  |              |              |              |
| TCGA-CD-8531A | -0.296696191 | 0.498135455  | 0.488335283  | 0.632819291  | -0.008870268 |              |
|               | -0.178936177 | 0.139710034  | 0.29059292   | -0.073809051 | -0.25055281  | 0.014143487  |
|               | -0.331028592 | 0.025675116  | 0.352566543  | 0.209003134  | 0.271699498  | 0.095955288  |
|               | 0.247491594  | 0.494395837  | 0.445212459  | -0.106694863 | 0.271870693  | -0.390363613 |
|               | 0.092903656  | 0.510343636  | 0.428975283  |              |              |              |
| TCGA-CD-8532B | 0.160861109  | 0.192111888  | -0.142313765 | 0.032502321  | 0.114163433  |              |
|               | 0.332538262  | 0.188916133  | 0.363842138  | -0.079139867 | 0.1232419    | -0.091864828 |
|               | -0.160584645 | 0.298116755  | 0.276474536  | 0.259838583  | -0.077140702 | 0.215138327  |
|               | 0.30100808   | 0.340175941  | 0.573983856  | 0.066050168  | 0.095040476  | -0.119213474 |
|               | 0.141247725  | 0.46634507   | 0.419200256  |              |              |              |
| TCGA-CD-8533B | -0.27638281  | 0.294232466  | 0.279939403  | 0.66406662   | -0.191187741 |              |
|               | -0.484100177 | -0.419285673 | -0.307560215 | 0.120302601  | -0.015576865 | -0.255292313 |
|               | -0.378047914 | -0.509806096 | -0.526991986 | -0.304432352 | -0.458364661 | -0.491767395 |
|               | -0.370382663 | -0.343175691 | -0.681271348 | -0.195835802 | 0.026819366  | -0.02531577  |
|               | -0.119635812 | -0.732889069 | -0.783817845 |              |              |              |
| TCGA-CD-8534A | -0.037664105 | -0.209526636 | -0.359981177 | -0.192451298 | -0.165292595 |              |
|               | -0.086777453 | -0.183976263 | -0.174294401 | -0.118820192 | -0.164891401 | -0.202386844 |
|               | -0.272530844 | 0.027020226  | -0.112821293 | -0.219002682 | -0.251334178 | -0.093613558 |
|               | -0.273468345 | -0.289574307 | 0.093819552  | -0.187023181 | 0.000588793  | -0.085717326 |
|               | 0.015465817  | 0.158648342  | -0.139219878 |              |              |              |
| TCGA-CD-8535A | -0.330465221 | 0.180538258  | 0.419297494  | 0.535911798  | -0.214288423 |              |
|               | -0.487918046 | -0.469379897 | -0.123842549 | 0.110486518  | 0.068678214  | -0.243156946 |
|               | -0.373439069 | -0.500349196 | -0.419406708 | -0.29635383  | -0.438495711 | -0.264466921 |
|               | -0.262099659 | -0.227017188 | -0.604595733 | -0.086853565 | -0.021407607 | -0.04869763  |
|               | -0.057878297 | -0.636398253 | -0.715554702 |              |              |              |
| TCGA-CD-A486  | B            | 0.00325038   | -0.163181314 | -0.308228265 | -0.443281226 |              |
|               | -0.126702972 | -0.001221519 | -0.275774726 | -0.417190937 | -0.131747376 | -0.276805631 |
|               | -0.29624823  | -0.025408236 | -0.058744813 | 0.203812442  | -0.21207014  | -0.091043575 |
|               | -0.31950712  | -0.358318806 | -0.360884288 | 0.299344727  | -0.225364474 | -0.381248315 |
|               | 0.089607963  | -0.344601787 | 0.439577975  | 0.26479852   |              |              |
| TCGA-CD-A489  | B            | -0.319635864 | -0.469894488 | -0.278614648 | -0.549637754 | 0.094948476  |
|               | 0.030315824  | -0.081528716 | -0.072500303 | 0.100035321  | 0.227929821  | 0.255099651  |
|               | 0.315832841  | 0.257795294  | -0.166445975 | -0.17921822  | -0.286191265 | 0.051222884  |
|               | -0.176569958 | -0.079744096 | -0.039739038 | 0.011065272  | -0.057546892 | 0.232470122  |
|               | 0.104491042  | -0.034229105 | -0.087872824 |              |              |              |
| TCGA-CD-A48A  | A            | -0.009020872 | -0.259352259 | -0.383879238 | -0.243287096 |              |

|               |   |              |              |              |              |              |              |
|---------------|---|--------------|--------------|--------------|--------------|--------------|--------------|
|               |   | -0.233649725 | -0.265858104 | -0.356176389 | -0.550035924 | -0.325926992 | -0.268434747 |
|               |   | -0.400940952 | -0.284530825 | -0.287002225 | -0.239456676 | -0.448265679 | -0.50026427  |
|               |   | -0.280136146 | -0.42230529  | -0.437850053 | -0.36065808  | -0.365619209 | -0.428182154 |
|               |   | -0.20100187  | -0.221254924 | -0.257237617 | -0.287632609 |              |              |
| TCGA-CD-A48C  | B | 0.2695406    | 0.263535504  | -0.03637519  | 0.163595993  |              |              |
|               |   | -0.069919602 | 0.114110826  | -0.094264504 | -0.095394313 | -0.036571566 | 0.054723949  |
|               |   | 0.00637618   | 0.218553403  | -0.105171585 | -0.29171016  | -0.100210708 | 0.098337223  |
|               |   | -0.177749803 | -0.176337782 | -0.239517066 | -0.262151328 | -0.031430953 | -0.118899883 |
|               |   | 0.118934224  | 0.153250893  | -0.375743318 | -0.378963888 |              |              |
| TCGA-CD-A4MG  | A | 0.053431919  | 0.223512543  | -0.065466023 | 0.307181358  |              |              |
|               |   | -0.286001874 | 0.094172694  | -0.085022418 | -0.338091698 | -0.189156357 | -0.358770875 |
|               |   | -0.133411092 | 0.214353276  | -0.064853501 | -0.219435969 | -0.30558135  | -0.22352334  |
|               |   | -0.194417199 | -0.429661539 | -0.24391419  | 0.228728451  | -0.259007289 | -0.213848756 |
|               |   | -0.106636759 | -0.03178864  | -0.345789884 | -0.273967914 |              |              |
| TCGA-CD-A4MH  | A | -0.005433119 | -0.194105859 | -0.087833966 | 0.029164573  |              |              |
|               |   | -0.162391835 | 0.09748446   | -0.092647401 | -0.320948872 | -0.148528075 | -0.100272914 |
|               |   | -0.269877865 | -0.154405788 | -0.146143076 | -0.319075506 | -0.276312045 | -0.111136521 |
|               |   | -0.269988865 | -0.181632516 | -0.166270012 | -0.047040536 | -0.209171808 | -0.17472748  |
|               |   | 0.125997272  | -0.118944728 | -0.116796736 | -0.252234894 |              |              |
| TCGA-CG-4437B |   | -0.01631994  | 0.411124425  | 0.216848262  | 0.193559735  | 0.103360966  |              |
|               |   | 0.299037326  | 0.168260858  | 0.217959224  | -0.076493349 | -0.029030887 | 0.111952426  |
|               |   | 0.182104672  | 0.332390733  | 0.633729992  | 0.317883079  | 0.240301197  | 0.312069614  |
|               |   | 0.187528213  | 0.298087945  | 0.555380393  | 0.100078071  | -0.023909471 | -0.054807492 |
|               |   | 0.168259706  | 0.691732041  | 0.666182884  |              |              |              |
| TCGA-CG-4441B |   | -0.10285072  | 0.37114846   | 0.125001088  | 0.237485349  | 0.262894464  |              |
|               |   | 0.147269609  | 0.149632165  | 0.399675923  | 0.104930708  | 0.199422793  | 0.184946232  |
|               |   | 0.131583782  | -0.067872301 | -0.10650538  | 0.248688128  | 0.272825684  | 0.230142887  |
|               |   | 0.307826678  | 0.338560393  | -0.040831624 | 0.272926042  | 0.214846133  | 0.303913132  |
|               |   | 0.283514264  | -0.059765812 | 0.110058248  |              |              |              |
| TCGA-CG-5717A |   | 0.043733697  | -0.360059353 | -0.292092665 | -0.435416883 | 0.309603582  |              |
|               |   | 0.257404495  | 0.198619057  | 0.241885934  | 0.236258619  | 0.117784493  | -0.026278302 |
|               |   | -0.260846979 | 0.185870926  | 0.080722188  | 0.401125923  | 0.232125393  | 0.26254193   |
|               |   | 0.425335354  | 0.450994613  | 0.152080865  | 0.194861333  | 0.221849193  | 0.227932619  |
|               |   | 0.216494836  | 0.284556956  | 0.223370464  |              |              |              |
| TCGA-CG-5718A |   | 0.10346866   | 0.346533964  | -0.119061571 | 0.219625633  | -0.004160113 |              |
|               |   | 0.314201285  | 0.181593497  | -0.070255561 | -0.134966732 | -0.249518966 | -0.138065352 |
|               |   | -0.087939133 | 0.233143564  | 0.278519306  | 0.081365783  | 0.155443869  | 0.071791392  |
|               |   | -0.039059197 | -0.073772199 | 0.408891851  | -0.03095698  | -0.167768685 | 0.104841818  |
|               |   | -0.151528951 | 0.382230157  | 0.439988171  |              |              |              |
| TCGA-CG-5719B |   | 0.090628561  | -0.135467013 | -0.2509713   | -0.446164987 | 0.125445426  |              |
|               |   | 0.269303157  | 0.06954406   | -0.010401099 | 0.088070039  | 0.130385454  | 0.370499329  |
|               |   | 0.575909476  | 0.368999946  | 0.058370531  | -0.049915628 | -0.124242325 | 0.064732272  |
|               |   | -0.163408696 | -0.005391218 | 0.183475778  | 0.095181585  | 0.014286717  | 0.294959897  |
|               |   | 0.184151904  | 0.104485489  | 0.150005659  |              |              |              |

|               |              |              |              |              |              |
|---------------|--------------|--------------|--------------|--------------|--------------|
| TCGA-CG-5720A | 0.533353784  | -0.044077222 | -0.459610472 | -0.403118466 | 0.007444461  |
|               | 0.379174365  | 0.334474125  | 0.247386029  | -0.121229057 | -0.21166292  |
|               | -0.212772795 | 0.387941159  | 0.329116011  | 0.246340207  | -0.012497488 |
|               | 0.172793166  | 0.288221747  | 0.613949194  | 0.012412059  | 0.053574414  |
|               | 0.132646079  | 0.594606454  | 0.537485555  |              | -0.026742055 |
| TCGA-CG-5721A | -0.295038476 | 0.318583665  | 0.25818907   | 0.066875278  | 0.05147345   |
|               | 0.430253169  | 0.345562137  | 0.435061009  | -0.186403643 | -0.174927964 |
|               | -0.164966087 | 0.411600821  | 0.620978676  | 0.50069242   | 0.395599969  |
|               | 0.405136418  | 0.377388169  | 0.57260804   | 0.053310432  | 0.066583815  |
|               | -0.054197498 | 0.769856811  | 0.786187335  |              | -0.204896313 |
| TCGA-CG-5722A | 0.156286749  | -0.13875571  | -0.296162284 | -0.159376984 | 0.184091057  |
|               | 0.375157144  | 0.2551591    | 0.258483785  | -0.053397597 | 0.027145352  |
|               | -0.102079731 | 0.444300884  | 0.435948186  | 0.241774644  | 0.089364118  |
|               | 0.253003789  | 0.237176403  | 0.628043996  | 0.09266046   | 0.076776349  |
|               | 0.225519394  | 0.683870208  | 0.667593807  |              | 0.187118942  |
| TCGA-CG-5723A | -0.057124988 | 0.248059538  | 0.20552151   | 0.053357011  | 0.058153474  |
|               | 0.416272749  | 0.248375189  | 0.161801912  | -0.200727055 | -0.082479402 |
|               | -0.327879445 | 0.280029517  | 0.586349642  | 0.353438918  | 0.445260727  |
|               | 0.136275209  | 0.082547587  | 0.51073721   | -0.020640151 | -0.142837433 |
|               | 0.06044567   | 0.712838898  | 0.725764508  |              | -0.148315856 |
| TCGA-CG-5724A | -0.08250117  | 0.449498673  | 0.287953039  | 0.378258455  | -0.060466685 |
|               | 0.050238177  | -0.096715551 | -0.06070339  | -0.093946159 | -0.184057781 |
|               | 0.001149362  | -0.101412311 | 0.300954307  | 0.122154665  | 0.228233667  |
|               | -0.086995348 | -0.018962202 | -0.053066866 | -0.007284085 | -0.067550974 |
|               | 0.060835574  | 0.253317467  | 0.337043149  |              | -0.162203167 |
| TCGA-CG-5725A | -0.290410417 | 0.443261698  | 0.269385101  | 0.408510702  | -0.148835177 |
|               | -0.374054438 | -0.383872861 | -0.214989074 | 0.191347522  | -0.035825147 |
|               | -0.212893    | -0.306624876 | -0.336281641 | -0.262792093 | -0.285838227 |
|               | -0.24354751  | -0.347746259 | -0.529048705 | -0.031338247 | -0.164954809 |
|               | 0.204497312  | -0.5366631   | -0.555854522 |              | 0.384842807  |
| TCGA-CG-5726A | 0.159001015  | 0.615219114  | 0.363059405  | 0.231175245  | -0.148966718 |
|               | -0.354143104 | -0.239657596 | 0.179433097  | -0.063067476 | -0.092842136 |
|               | -0.457587016 | -0.306871206 | 0.072857499  | -0.121718253 | -0.214126096 |
|               | -0.207261747 | -0.121015178 | -0.210684048 | -0.068658215 | -0.108872647 |
|               | -0.106675261 | -0.100481301 | -0.239640196 |              | -0.296242645 |
| TCGA-CG-5732A | 0.367567892  | -0.062646943 | -0.444736026 | -0.414282856 | -0.126524207 |
|               | 0.294370999  | 0.167121739  | 0.104932033  | -0.137675194 | -0.208395133 |
|               | -0.416549967 | 0.249851767  | 0.503517252  | 0.00193624   | 0.033109878  |
|               | 0.074627197  | 0.16603211   | 0.616437171  | -0.165029535 | -0.322703111 |
|               | -0.263289658 | 0.644592651  | 0.623901914  |              | 0.078349376  |
| TCGA-D7-5577A | -0.038860144 | 0.40617931   | 0.458444575  | 0.427862661  | -0.074725187 |
|               | 0.336031648  | 0.206298371  | 0.165484582  | -0.131368857 | -0.056341721 |
|               | -0.042466508 | 0.246642047  | 0.644950148  | 0.362831104  | 0.287324906  |
|               | 0.203139214  | 0.193431747  | 0.403082723  | 0.07224233   | -0.013311113 |
|               |              |              |              |              | -0.228315711 |

|               |              |              |              |              |              |              |
|---------------|--------------|--------------|--------------|--------------|--------------|--------------|
|               | -0.003226602 | 0.715402993  | 0.686220148  |              |              |              |
| TCGA-D7-5578B | 0.277259956  | 0.357830083  | -0.148550539 | 0.123331272  | 0.040737787  |              |
|               | 0.316957826  | 0.264298603  | 0.037277015  | 0.048518772  | 0.006665801  | -0.033870445 |
|               | -0.206143381 | 0.231996323  | 0.281799499  | 0.137752192  | 0.153729837  | 0.115015562  |
|               | 0.116436086  | 0.182787911  | 0.442961253  | 0.105102562  | 0.158721469  | 0.271647462  |
|               | 0.229040985  | 0.471673598  | 0.425651219  |              |              |              |
| TCGA-D7-6519A | -0.38184318  | 0.150512909  | 0.020790767  | -0.290108755 | -0.061172106 |              |
|               | -0.30089674  | -0.254477886 | 0.041769808  | -0.021842964 | -0.000435141 | -0.118547357 |
|               | -0.107070428 | -0.271438588 | -0.172054145 | -0.152478614 | -0.204286909 | 0.022244908  |
|               | -0.208115192 | -0.200154286 | -0.455306692 | -0.002673814 | -0.004721915 | 0.180185498  |
|               | 0.06157848   | -0.445336435 | -0.305646754 |              |              |              |
| TCGA-D7-6520B | 0.10925145   | -0.00394765  | -0.259931997 | -0.287490675 | 0.034255595  |              |
|               | -0.069668853 | -0.090570939 | 0.127515883  | 0.094082101  | 0.180391244  | 0.213214734  |
|               | 0.1535991    | 0.026166881  | 0.03152049   | 0.148790686  | 0.055787912  | -0.12850554  |
|               | -0.065954352 | -0.048717195 | -0.357444581 | 0.092786346  | -0.020689487 | 0.308399969  |
|               | -0.048835472 | -0.141488287 | -0.217455251 |              |              |              |
| TCGA-D7-6521B | 0.139293224  | -0.337006754 | -0.430162339 | -0.398343352 | 0.105402726  |              |
|               | 0.382361146  | 0.292164722  | 0.140614678  | -0.077450678 | 0.248781201  | 0.284302211  |
|               | 0.391449041  | 0.490811978  | 0.143547943  | 0.258198517  | 0.06050148   | 0.206173334  |
|               | 0.254748539  | 0.316506941  | 0.476739785  | 0.07398159   | 0.041030911  | -0.000669484 |
|               | 0.142918776  | 0.325843084  | 0.325678595  |              |              |              |
| TCGA-D7-6522B | 0.28411155   | -0.129955148 | -0.451527394 | -0.463902897 | 0.189444778  |              |
|               | 0.502313719  | 0.402385839  | 0.232229671  | 0.033591668  | 0.071134455  | 0.225461154  |
|               | 0.242836866  | 0.567149881  | 0.44371041   | 0.400535023  | 0.302000464  | 0.399231862  |
|               | 0.374866236  | 0.391575752  | 0.697321271  | 0.154078735  | 0.068662381  | 0.321603543  |
|               | 0.141181987  | 0.734362765  | 0.691606661  |              |              |              |
| TCGA-D7-6524B | 0.134343049  | -0.12232245  | -0.431062066 | -0.576963021 | 0.271539426  |              |
|               | 0.354575957  | 0.405405521  | 0.50465005   | 0.22446982   | 0.344534186  | 0.440191008  |
|               | 0.507849348  | 0.283666767  | -0.189552026 | 0.371491497  | 0.498541583  | 0.15337017   |
|               | 0.278845492  | 0.334126295  | 0.050972765  | 0.350305517  | 0.300798862  | 0.320787099  |
|               | 0.170389733  | -0.038643342 | -0.010503651 |              |              |              |
| TCGA-D7-6525B | -0.400800026 | 0.255209863  | 0.278876939  | 0.412166097  | 0.048891765  |              |
|               | 0.043786377  | -0.098290749 | 0.105186147  | -0.016248535 | 0.047019097  | 0.193851206  |
|               | 0.219234895  | -0.071803323 | 0.314662888  | 0.182738799  | 0.275303677  | 0.060219921  |
|               | -0.119730315 | -0.168547415 | -0.251100903 | 0.08125533   | 0.054337544  | -0.141379116 |
|               | 0.06384899   | -0.007624563 | 0.064074812  |              |              |              |
| TCGA-D7-6526A | 0.109963506  | 0.376444108  | 0.292473901  | 0.283521697  | -0.060854489 |              |
|               | -0.28473827  | -0.24584709  | -0.08555289  | 0.082416568  | -0.163527934 | -0.169331272 |
|               | -0.264387315 | -0.406132691 | -0.405706221 | -0.100796883 | -0.173979885 | -0.398445153 |
|               | -0.204336656 | -0.118244541 | -0.5049783   | 0.004452473  | -0.229008213 | 0.155164263  |
|               | -0.26126221  | -0.582568734 | -0.548314262 |              |              |              |
| TCGA-D7-6527A | 0.14889322   | 0.161203657  | -0.330243418 | -0.076074915 | -0.124429688 |              |
|               | 0.155517793  | -0.028397793 | -0.160769387 | -0.165519294 | -0.096717019 | -0.160229284 |
|               | -0.172860231 | 0.091560999  | -0.17773803  | -0.163063769 | -0.304379447 | -0.197713772 |

|               |              |              |              |              |              |              |
|---------------|--------------|--------------|--------------|--------------|--------------|--------------|
|               | -0.128511825 | -0.20649953  | 0.035101057  | -0.056266058 | -0.236789155 | 0.230027397  |
|               | -0.079354666 | -0.231008731 | -0.296763146 |              |              |              |
| TCGA-D7-6528A | -0.179800764 | 0.434326093  | 0.367010772  | 0.481502332  | -0.129911447 |              |
|               | -0.330615862 | -0.352435274 | -0.065559577 | -0.05559273  | -0.230045854 | -0.259585053 |
|               | -0.446074199 | -0.402036409 | 0.177147424  | -0.101655857 | -0.153479544 | -0.158734506 |
|               | -0.220824996 | -0.191957456 | -0.434109813 | -0.111446433 | -0.135132679 | -0.283262932 |
|               | -0.224546407 | -0.140404896 | -0.147029348 |              |              |              |
| TCGA-D7-6815B | 0.412830971  | 0.264367393  | 0.16701763   | 0.344173939  | -0.056752996 |              |
|               | -0.334181674 | -0.132317356 | 0.01356483   | 0.138492998  | -0.027913298 | 0.020098152  |
|               | -0.20440384  | -0.20331531  | -0.229930862 | -0.153731421 | -0.203111252 | -0.151010705 |
|               | 0.004894988  | 0.04876557   | -0.329395316 | 0.06963449   | 0.015128259  | 0.19356401   |
|               | -0.179901715 | -0.314488456 | -0.405470766 |              |              |              |
| TCGA-D7-6818B | 0.037813729  | -0.109129514 | -0.136366635 | -0.072474573 | 0.025809804  |              |
|               | -0.031883453 | 0.162024861  | -0.255037822 | -0.063420455 | -0.107762414 | 0.152643346  |
|               | 0.228543578  | 0.237834376  | 0.140751622  | 0.167000987  | -0.027855693 | -0.081198582 |
|               | -0.157593859 | 0.112708555  | 0.05071971   | -0.016168768 | 0.029211626  | -0.025271271 |
|               | -0.020528871 | -0.050841377 | -0.128138372 |              |              |              |
| TCGA-D7-6822B | -0.246678867 | 0.095567981  | 0.417977253  | 0.401913022  | -0.138432469 |              |
|               | -0.290866747 | -0.26801504  | -0.121207574 | 0.14934251   | 0.171684363  | -0.113131029 |
|               | -0.102715773 | -0.143366131 | -0.074941429 | 0.054132565  | -0.05878844  | -0.014380831 |
|               | -0.034672017 | -0.082381788 | -0.58323789  | 0.109138819  | 0.112318863  | 0.3064907    |
|               | 0.040970015  | -0.171003492 | -0.13640359  |              |              |              |
| TCGA-D7-8570B | -0.159613747 | -0.101092921 | -0.234762275 | 0.285209472  | -0.080709654 |              |
|               | 0.35748379   | 0.279982613  | 0.14877128   | -0.21467794  | -0.29261538  | 0.032583393  |
|               | 0.297788018  | 0.495758243  | 0.62073566   | 0.392084518  | 0.229441872  | 0.436223638  |
|               | 0.352736015  | 0.357479338  | 0.628253454  | 0.027973916  | 0.235166478  | -0.216512568 |
|               | 0.014665688  | 0.714639586  | 0.714137866  |              |              |              |
| TCGA-D7-8572B | -0.056131889 | 0.163066906  | -0.068794829 | 0.068483045  | 0.128697611  |              |
|               | -0.022135143 | 0.032937399  | 0.009034974  | 0.134746338  | 0.18433354   | 0.146414851  |
|               | 0.242613646  | -0.021656623 | -0.373672723 | 0.116361611  | 0.093513402  | -0.096407275 |
|               | 0.176556464  | 0.055485395  | -0.372564499 | 0.196767138  | -0.052096489 | 0.238871624  |
|               | 0.216582588  | -0.46145157  | -0.412547582 |              |              |              |
| TCGA-D7-8573A | -0.213701513 | 0.406973545  | 0.529337107  | 0.579320421  | -0.117017252 |              |
|               | -0.198639991 | -0.211002481 | -0.030072109 | -0.064404676 | -0.174733888 | -0.178890033 |
|               | -0.310091949 | -0.338689868 | 0.04848575   | -0.061631402 | -0.267344463 | -0.114263905 |
|               | -0.146390716 | -0.145482694 | -0.327906722 | -0.034532232 | 0.072020426  | -0.26994333  |
|               | 0.02479069   | -0.247737816 | -0.228579828 |              |              |              |
| TCGA-D7-8574B | -0.153534305 | -0.468112376 | -0.410081372 | -0.510033641 | 0.109690324  |              |
|               | 0.229738505  | 0.297221013  | 0.135924493  | 0.112016123  | 0.134612605  | 0.144191419  |
|               | 0.09891518   | 0.39410473   | -0.099912625 | 0.255088046  | 0.073905739  | 0.278031906  |
|               | 0.382023665  | 0.431882574  | 0.589136381  | 0.051683476  | 0.229912608  | 0.286515378  |
|               | 0.113102091  | 0.42982897   | 0.317106239  |              |              |              |
| TCGA-D7-8575A | -0.037096444 | -0.373022119 | -0.364654813 | -0.318527441 | 0.16540412   |              |
|               | 0.018526505  | 0.057657073  | 0.247157193  | 0.070997139  | 0.124989102  | -0.018773775 |

|               |   |              |              |              |              |              |              |
|---------------|---|--------------|--------------|--------------|--------------|--------------|--------------|
|               |   | -0.285682147 | -0.064922134 | -0.2603951   | 0.324271248  | 0.289027259  | 0.057728554  |
|               |   | 0.245982413  | 0.351099037  | 0.202269266  | 0.150236409  | 0.248031667  | 0.11873436   |
|               |   | 0.170156567  | -0.121389414 | -0.312299745 |              |              |              |
| TCGA-D7-8576B |   | 0.353411105  | 0.385766357  | -0.034776733 | -0.170170821 | -0.104309231 |              |
|               |   | -0.314472243 | -0.199631089 | 0.278650147  | 0.053832894  | -0.153980458 | -0.090968592 |
|               |   | -0.209148502 | -0.256046671 | -0.131952703 | 0.053823759  | -0.076589248 | -0.335961246 |
|               |   | -0.151379936 | -0.015280226 | -0.189343189 | -0.01510702  | -0.050872315 | -0.024948927 |
|               |   | -0.017318928 | -0.430250207 | -0.60081623  |              |              |              |
| TCGA-D7-8578B |   | 0.197535629  | -0.452912814 | -0.501427898 | -0.537281701 | 0.228258606  |              |
|               |   | 0.095178839  | -0.00994234  | 0.07354373   | 0.226444428  | 0.315601133  | 0.408129918  |
|               |   | 0.485082821  | 0.216353577  | -0.385980842 | 0.058916061  | -0.122636621 | -0.119386052 |
|               |   | 0.091313238  | 0.157885467  | -0.150259015 | 0.246876854  | 0.192664739  | 0.383809439  |
|               |   | 0.320351393  | -0.290392253 | -0.442488589 |              |              |              |
| TCGA-D7-8579B |   | 0.078984716  | -0.626175182 | -0.487513399 | -0.650294228 | 0.260098901  |              |
|               |   | 0.256562158  | 0.320859701  | 0.435803446  | 0.216281318  | 0.239893977  | 0.391626929  |
|               |   | 0.386928282  | 0.215151664  | -0.456638387 | 0.181484358  | 0.26065703   | 0.0573502    |
|               |   | 0.082796009  | 0.248322161  | 0.044380056  | 0.156845328  | 0.122551886  | 0.176326213  |
|               |   | 0.002416972  | -0.391542896 | -0.387861628 |              |              |              |
| TCGA-D7-A4YU  | B | -0.352983153 | 0.334193845  | 0.429218836  | 0.499747566  | 0.047578513  |              |
|               |   | 0.222719566  | 0.313041121  | 0.338090737  | 0.033993512  | 0.02910179   | 0.103262886  |
|               |   | -0.089294389 | 0.368446756  | 0.370264061  | 0.350108184  | 0.293805873  | 0.308189665  |
|               |   | 0.471489675  | 0.41254887   | 0.418071445  | 0.107412628  | 0.120503831  | -0.169553599 |
|               |   | 0.062901236  | 0.631404255  | 0.498515449  |              |              |              |
| TCGA-D7-A4YX  | A | -0.242591154 | 0.398464941  | 0.576546786  | 0.614151028  |              |              |
|               |   | -0.031087637 | 0.069018052  | 0.078178827  | 0.401198608  | -0.09181947  | -0.176919472 |
|               |   | -0.104672551 | -0.251710635 | -0.044587412 | 0.530435384  | 0.373063819  | 0.283963181  |
|               |   | 0.318735003  | 0.26451233   | 0.144792369  | 0.278556074  | 0.040717301  | 0.244845057  |
|               |   | -0.354130148 | 0.048678115  | 0.521447595  | 0.50711487   |              |              |
| TCGA-D7-A4Z0B |   | 0.263326501  | -0.666353272 | -0.577582395 | -0.730753783 | 0.237453823  |              |
|               |   | 0.446123626  | 0.373346373  | 0.284225564  | 0.076238858  | 0.170124841  | 0.29053731   |
|               |   | 0.350517937  | 0.385845057  | -0.194794106 | 0.101386259  | 0.318277772  | 0.233933113  |
|               |   | 0.287973373  | 0.353613271  | 0.401289065  | 0.183456404  | 0.063952105  | 0.270799714  |
|               |   | 0.162387249  | 0.183422344  | -0.005776885 |              |              |              |
| TCGA-D7-A6EV  | A | -0.225653099 | 0.615649236  | 0.451001933  | 0.385568009  |              |              |
|               |   | -0.089976939 | -0.31648273  | -0.163040884 | 0.268882298  | -0.139435434 | -0.20172718  |
|               |   | -0.189049341 | -0.302249081 | -0.53997457  | -0.338046035 | -0.157344234 | 0.311501089  |
|               |   | -0.290879894 | -0.021306508 | -0.133113216 | -0.438687782 | -0.029512136 | -0.088109004 |
|               |   | -0.308888108 | -0.248880982 | -0.558319766 | -0.591586288 |              |              |
| TCGA-D7-A6EX  | A | -0.332758302 | 0.196850141  | -0.042410097 | -0.001583082 | -0.07793887  |              |
|               |   | -0.339187792 | -0.368060826 | -0.418599458 | 0.087882199  | -0.015905322 | -0.276016602 |
|               |   | -0.170111958 | -0.374583218 | -0.505005715 | -0.468102992 | -0.509325994 | -0.319641828 |
|               |   | -0.339035889 | -0.446799886 | -0.487568783 | -0.175353706 | -0.100320117 | 0.059440179  |
|               |   | -0.037326917 | -0.620180044 | -0.65044492  |              |              |              |
| TCGA-D7-A6EYB |   | -0.295686911 | 0.412874741  | 0.313390807  | 0.23969411   | 0.100602748  |              |

|                |              |              |              |              |              |              |
|----------------|--------------|--------------|--------------|--------------|--------------|--------------|
|                | 0.331383998  | 0.360611063  | 0.415637797  | 0.082955742  | 0.088613845  | 0.073948182  |
|                | -0.026605333 | 0.380142807  | 0.537520751  | 0.374228954  | 0.36068796   | 0.467111732  |
|                | 0.429854157  | 0.480042446  | 0.603450941  | 0.207267793  | 0.055371099  | 0.219736814  |
|                | 0.02037491   | 0.693930769  | 0.693878193  |              |              |              |
| TCGA-D7-A6EZB  | -0.220444882 | 0.491424918  | 0.665018914  | 0.70785515   | -0.095184119 |              |
|                | 0.157329228  | 0.171491111  | 0.305010306  | -0.016084403 | -0.089447356 | -0.155844988 |
|                | -0.210817656 | 0.108414312  | 0.596575783  | 0.374022698  | 0.419559061  | 0.264236709  |
|                | 0.214208334  | 0.121889089  | 0.440974477  | 0.01184736   | 0.047105157  | -0.15645173  |
|                | 0.011712226  | 0.647354905  | 0.628310998  |              |              |              |
| TCGA-D7-A6F0A  | 0.090204496  | 0.369028805  | 0.197950592  | 0.481555058  | -0.219907521 |              |
|                | -0.264444668 | -0.199580226 | -0.380404533 | -0.275377553 | -0.112341306 | -0.248540259 |
|                | -0.190728111 | -0.182895886 | -0.075993302 | -0.307110271 | -0.126255012 | -0.170988564 |
|                | -0.073033838 | -0.293295443 | -0.240012375 | -0.118963019 | -0.156777667 | -0.156749194 |
|                | -0.114505051 | -0.155748128 | -0.31618858  |              |              |              |
| TCGA-D7-A6F2A  | -0.086719612 | -0.004792875 | -0.311700312 | -0.064237488 | -0.049906041 |              |
|                | 0.06755666   | 0.071356508  | -0.143413852 | 0.116665842  | -0.288826882 | -0.271587    |
|                | -0.201244654 | 0.183828296  | 0.302933194  | -0.078840546 | -0.12819725  | 0.04204555   |
|                | 0.031877197  | -0.003216884 | 0.329734549  | -0.128967596 | -0.084461379 | 0.269932475  |
|                | -0.298413154 | 0.415200238  | 0.324132882  |              |              |              |
| TCGA-D7-A747   | B            | -0.050922484 | -0.639677367 | -0.421851345 | -0.578677619 | 0.123383014  |
|                | 0.080905112  | 0.046261174  | -0.21750344  | 0.097022908  | 0.202988282  | 0.140777838  |
|                | 0.218008589  | 0.082549133  | -0.082142925 | 0.038496004  | -0.317702175 | 0.012754857  |
|                | -0.156984418 | 0.005125666  | 0.22634071   | -0.094163957 | -0.001744038 | 0.176197753  |
|                | 0.040873907  | -0.0861207   | -0.218355145 |              |              |              |
| TCGA-D7-A748   | B            | 0.391521258  | -0.657382917 | -0.495438372 | -0.640385719 | 0.017411028  |
|                | 0.457422458  | 0.324662694  | -0.093865676 | -0.133844602 | 0.243228578  | 0.271749333  |
|                | 0.466807165  | 0.468347747  | 0.299951213  | 0.225727712  | 0.226424019  | 0.223432782  |
|                | -0.057938559 | 0.21665766   | 0.508759485  | 0.080157278  | -0.178364278 | 0.192783182  |
|                | 0.112145163  | 0.575335124  | 0.529538275  |              |              |              |
| TCGA-EQ-8122B  | 0.131346833  | 0.139409468  | 0.077854299  | 0.217758011  | 0.009402419  |              |
|                | -0.287395339 | -0.130342999 | -0.045665135 | 0.192188072  | 0.010174599  | 0.205575849  |
|                | 0.238572991  | -0.407661601 | -0.497393552 | -0.158303795 | 0.109196819  | -0.327928815 |
|                | -0.217755824 | -0.167879098 | -0.634573871 | 0.106917062  | -0.124999761 | 0.159321986  |
|                | -0.167138143 | -0.737427691 | -0.703287453 |              |              |              |
| TCGA-F1-6177 A | 0.024811158  | 0.49068637   | 0.416987731  | 0.419381901  | -0.028058559 |              |
|                | -0.266015478 | -0.093304544 | 0.14531321   | -0.178425199 | -0.258469436 | -0.173179963 |
|                | -0.352860913 | -0.320247313 | 0.101325749  | 0.153089454  | 0.080498335  | -0.074329158 |
|                | 0.04810272   | -0.146183963 | -0.293556929 | -0.131624413 | 0.107131407  | -0.391100395 |
|                | -0.022884212 | -0.196544009 | 0.160283981  |              |              |              |
| TCGA-F1-6874 B | 0.195369111  | -0.227834324 | -0.179534304 | -0.26053477  | 0.231703605  |              |
|                | 0.195678765  | 0.203570396  | 0.400114721  | -0.091615285 | 0.092001628  | 0.216916014  |
|                | 0.163244938  | 0.11735373   | 0.198596419  | 0.354277991  | 0.368345623  | 0.361279389  |
|                | 0.324895623  | 0.266710326  | 0.156742556  | 0.139097508  | 0.316748503  | -0.217995141 |
|                | 0.244522324  | 0.128754744  | 0.275002177  |              |              |              |

|                |              |              |              |              |              |
|----------------|--------------|--------------|--------------|--------------|--------------|
| TCGA-F1-6875 A | -0.25585531  | 0.54083737   | 0.323864176  | 0.262655284  | -0.053743831 |
|                | -0.435352351 | -0.379885118 | -0.086756727 | 0.090516785  | 0.183500695  |
|                | -0.310945377 | -0.385602585 | -0.492548465 | -0.153993999 | -0.004104253 |
|                | -0.151538882 | -0.356156299 | -0.633712644 | -0.067934872 | 0.001435971  |
|                | 0.047567603  | -0.681053577 | -0.679429936 |              | -0.183590737 |
| TCGA-F1-A448 B | -0.03137972  | -0.419153362 | -0.337818989 | -0.493876076 | 0.208170366  |
|                | 0.454845138  | 0.328706148  | 0.226132162  | 0.04474146   | 0.244706325  |
|                | 0.391778479  | 0.366195608  | 0.069330557  | 0.163231336  | 0.30215454   |
|                | 0.133434962  | 0.256320523  | 0.434010332  | 0.16451091   | 0.100715856  |
|                | 0.202250535  | 0.18548412   | 0.339233834  |              | 0.22951882   |
| TCGA-F1-A72CB  | -0.218779761 | 0.279056172  | 0.112379508  | 0.171689516  | -0.00145365  |
|                | 0.099515594  | -0.029099672 | -0.058069681 | -0.049698955 | 0.225349222  |
|                | 0.293599417  | 0.266060367  | 0.230127191  | 0.055931067  | 0.143804071  |
|                | -0.046198705 | 0.020742401  | 0.343851467  | -0.045204462 | -0.181186096 |
|                | -0.045770273 | 0.350300663  | 0.294141703  |              | -0.12441012  |
| TCGA-FP-7735 B | 0.188596077  | -0.479767415 | -0.268711814 | -0.554287147 | 0.040025617  |
|                | -0.137052099 | -0.134343551 | -0.199428523 | 0.022314006  | -0.15289675  |
|                | 0.200087639  | 0.164021732  | 0.112357476  | -0.257312739 | -0.280646769 |
|                | -0.278544135 | -0.298132504 | -0.024530118 | -0.145016946 | 0.045547347  |
|                | 0.024642091  | -0.067603514 | 0.023297145  |              | -0.117428576 |
| TCGA-FP-7829 B | 0.013998386  | -0.437175819 | 0.096823923  | -0.300501876 | 0.14102998   |
|                | -0.434553651 | -0.208383831 | -0.053315282 | 0.253368324  | 0.197430704  |
|                | 0.160484396  | -0.328794038 | -0.452088278 | -0.097022052 | -0.355695839 |
|                | -0.254490869 | -0.141247982 | -0.645459398 | 0.047086299  | 0.282384801  |
|                | 0.123492806  | -0.746401449 | -0.756219261 |              | -0.049010748 |
| TCGA-FP-7916 B | -0.257675347 | -0.43802384  | 0.004294273  | -0.045672185 | 0.135781767  |
|                | 0.432858894  | 0.348423537  | 0.402509515  | 0.155542843  | 0.324572384  |
|                | 0.28427078   | 0.5259662    | 0.489152165  | 0.382372008  | 0.284144083  |
|                | 0.421663974  | 0.467917328  | 0.637223361  | 0.229693666  | 0.22302571   |
|                | 0.092699967  | 0.717771605  | 0.679339339  |              | 0.166086196  |
| TCGA-FP-7998 B | -0.328646347 | -0.386992626 | 0.105578596  | 0.188969326  | 0.201987315  |
|                | 0.361568432  | 0.394740698  | 0.454318665  | 0.093216598  | 0.130758642  |
|                | 0.377219032  | 0.483256919  | 0.564428762  | 0.484477697  | 0.361723715  |
|                | 0.50565909   | 0.443516362  | 0.571782371  | 0.268319718  | 0.294324364  |
|                | 0.313246592  | 0.716330732  | 0.643302848  |              | -0.079187206 |
| TCGA-FP-8099 B | -0.198395895 | 0.264791563  | 0.138247965  | 0.095337052  | 0.018067844  |
|                | -0.223418238 | -0.287827979 | -0.101460897 | 0.02912699   | 0.088358266  |
|                | -0.14361431  | -0.108215603 | 0.235542927  | -0.029388683 | -0.157451323 |
|                | -0.166048171 | 0.01427422   | 0.100605508  | 0.00114872   | 0.00965131   |
|                | -0.020264958 | -0.00637512  | -0.078420638 |              | -0.091061344 |
| TCGA-FP-8209 B | -0.289400207 | -0.610488341 | -0.370076668 | -0.611722063 | 0.364368751  |
|                | 0.218762017  | 0.304761608  | 0.301113156  | 0.343258722  | 0.298969044  |
|                | 0.396487228  | 0.399655195  | -0.219593371 | 0.234080419  | 0.08671736   |
|                | 0.418954356  | 0.47797133   | 0.354615306  | 0.216731909  | 0.373336775  |
|                |              |              |              |              | 0.354564363  |

|                |              |              |              |              |              |              |
|----------------|--------------|--------------|--------------|--------------|--------------|--------------|
|                | 0.340618114  | 0.145351563  | -0.052004795 |              |              |              |
| TCGA-FP-8210 B | -0.177881432 | -0.433732512 | -0.397114742 | -0.589624695 | 0.218066237  |              |
|                | 0.314098403  | 0.360283586  | 0.280553501  | 0.272091506  | 0.372024606  | 0.359497114  |
|                | 0.288729599  | 0.402869202  | -0.070257175 | 0.252517727  | -0.000272005 | 0.309546348  |
|                | 0.345231924  | 0.377029977  | 0.479516823  | 0.216742467  | 0.192656849  | 0.399656821  |
|                | 0.213570962  | 0.44112559   | 0.364561198  |              |              |              |
| TCGA-FP-8211 A | -0.095028438 | 0.314832547  | -0.098284034 | 0.216830331  | -0.131797984 |              |
|                | 0.037098984  | -0.222706944 | 0.00674805   | 0.003861992  | -0.250036818 | -0.249222001 |
|                | -0.185227331 | 0.057357167  | 0.217733544  | -0.062681244 | -0.232924438 | 0.157596129  |
|                | -0.037752459 | -0.110856513 | 0.037987882  | -0.093053077 | -0.28384791  | -0.069040103 |
|                | -0.27288401  | 0.334586847  | 0.202792469  |              |              |              |
| TCGA-FP-8631 B | -0.098249174 | -0.26011952  | -0.283705528 | -0.135442625 | -0.122512104 |              |
|                | -0.372972888 | -0.447376893 | -0.266563885 | -0.203540687 | -0.261756951 | -0.149003361 |
|                | 0.085876674  | -0.423933691 | -0.390501825 | -0.299035348 | -0.231718844 | -0.381828274 |
|                | -0.383551962 | -0.272748754 | -0.523358639 | -0.248698096 | -0.261341547 | -0.217429054 |
|                | -0.10455963  | -0.642770334 | -0.687166958 |              |              |              |
| TCGA-FP-A4BF B | -0.046527516 | -0.449445669 | -0.159854566 | -0.066390403 | -0.103589619 |              |
|                | 0.402331646  | 0.107690271  | -0.307986752 | -0.272109501 | -0.046369717 | 0.003681512  |
|                | 0.199549383  | 0.374564872  | 0.537299284  | 0.166132732  | 0.194046427  | 0.294399737  |
|                | 0.036280057  | -0.06044016  | 0.518540338  | -0.102220545 | -0.325170281 | -0.054498402 |
|                | -0.035263097 | 0.610954572  | 0.63019674   |              |              |              |
| TCGA-FP-A8CXA  | 0.446665325  | 0.110642679  | -0.088433135 | 0.026795746  | -0.210807894 |              |
|                | -0.154714631 | -0.080814544 | -0.032500427 | -0.211675976 | -0.194363798 | -0.158167953 |
|                | -0.244974756 | -0.194330556 | -0.205759965 | -0.127158762 | -0.130291442 | -0.137834985 |
|                | -0.143693327 | -0.181383866 | -0.158969033 | -0.181393927 | -0.103845762 | -0.365402957 |
|                | -0.196180324 | -0.153286305 | -0.214316752 |              |              |              |
| TCGA-FP-A9TM   | A            | -0.252544778 | 0.189897258  | 0.006495424  | 0.33387881   |              |
|                | -0.142852234 | -0.057696983 | 0.08385011   | 0.157574572  | -0.104204756 | -0.300529022 |
|                | -0.284987571 | -0.428994159 | -0.048891727 | -0.27291998  | -0.104259159 | -0.069255345 |
|                | 0.07060875   | 0.266382397  | 0.363926014  | 0.469011432  | -0.131183213 | 0.056074554  |
|                | -0.361385272 | -0.176649303 | 0.281128943  | -0.131850234 |              |              |
| TCGA-HF-7132 B | -0.003942254 | 0.2124728    | -0.107930564 | -0.119895557 | 0.01358156   |              |
|                | 0.24888383   | 0.401720091  | 0.392839916  | 0.15322907   | 0.211982356  | 0.090781623  |
|                | -0.127115996 | 0.261681522  | -0.03379129  | 0.283282662  | 0.261848741  | 0.364512607  |
|                | 0.470454667  | 0.521681288  | 0.468033789  | 0.128916577  | 0.348804737  | -0.00445812  |
|                | 0.117939515  | 0.317788125  | 0.269865676  |              |              |              |
| TCGA-HF-7133 B | 0.065296392  | 0.398972978  | 0.197222093  | 0.30913138   | 0.144738453  |              |
|                | 0.247366394  | 0.233399161  | 0.216923233  | 0.038131813  | 0.246829408  | 0.123387364  |
|                | 0.096678055  | 0.129847892  | 0.255892657  | 0.297867758  | 0.37504101   | 0.21621349   |
|                | 0.277527101  | 0.251050241  | 0.309560939  | 0.241037075  | 0.200442351  | 0.018477712  |
|                | 0.210427654  | 0.443230054  | 0.260154621  |              |              |              |
| TCGA-HF-7134 A | -0.033647664 | 0.376838422  | 0.170061009  | 0.34972013   | 0.098833187  |              |
|                | -0.068432873 | 0.047146804  | 0.356976762  | 0.108757094  | 0.18258604   | 0.070985619  |
|                | -0.125784966 | -0.138939197 | -0.104155139 | 0.238994365  | -0.043853319 | 0.085144929  |

|                |   |              |              |              |              |              |              |
|----------------|---|--------------|--------------|--------------|--------------|--------------|--------------|
|                |   | 0.15976165   | 0.291734574  | -0.27356113  | 0.17594177   | 0.208605275  | -0.16234529  |
|                |   | 0.04780118   | -0.407759384 | -0.248116604 |              |              |              |
| TCGA-HF-A5NB   | A | -0.031720226 | 0.287918252  | 0.204729484  | 0.047728028  |              |              |
|                |   | -0.006375553 | -0.342748361 | -0.190519599 | 0.08966448   | -0.045206706 | -0.284415068 |
|                |   | -0.166265798 | -0.386060491 | -0.341740438 | 0.138766339  | -0.021568412 | 0.005315178  |
|                |   | 0.009249283  | 0.105573151  | -0.053538074 | -0.085356284 | -0.127150186 | -0.20115428  |
|                |   | -0.338350175 | -0.259095244 | -0.301912415 | -0.182831076 |              |              |
| TCGA-HJ-7597 A |   | -0.40686163  | 0.134658126  | -0.167256666 | -0.314566746 | 0.092872476  |              |
|                |   | -0.018683861 | -0.134340555 | 0.135104838  | 0.006420621  | -0.004576768 | -0.119506744 |
|                |   | -0.260856642 | -0.399272608 | 0.011694641  | 0.172115262  | -0.097256628 | 0.292021435  |
|                |   | 0.138559601  | 0.087139556  | -0.389463914 | 0.02277021   | -0.175870493 | -0.10957621  |
|                |   | -0.093587867 | -0.506931579 | -0.312053626 |              |              |              |
| TCGA-HU-8238   | A | 0.537575426  | -0.342256205 | -0.516799692 | -0.622718103 |              |              |
|                |   | -0.066252076 | 0.13579028   | 0.121474745  | 0.067199561  | -0.167988337 | -0.224090408 |
|                |   | -0.233467552 | -0.240071882 | 0.123782897  | 0.045650954  | 0.036100883  | -0.058985331 |
|                |   | 0.145075279  | -0.114112529 | 0.05264109   | 0.195792579  | -0.12481558  | -0.096180583 |
|                |   | -0.205598527 | -0.168214416 | 0.015369539  | 0.09917341   |              |              |
| TCGA-HU-8244   | A | 0.17548308   | 0.29836915   | 0.049587782  | 0.348459507  |              |              |
|                |   | -0.303915496 | -0.365860823 | -0.410883306 | -0.183404491 | -0.137373211 | -0.285543595 |
|                |   | -0.446291775 | -0.527022131 | -0.459042521 | -0.16810592  | -0.264288877 | -0.33866087  |
|                |   | -0.262118986 | -0.413665598 | -0.410212565 | -0.437244963 | -0.266507757 | -0.248319969 |
|                |   | -0.230853845 | -0.334464915 | -0.422890192 | -0.417928925 |              |              |
| TCGA-HU-8249   | A | -0.229339526 | 0.338100944  | 0.290786025  | 0.478033786  |              |              |
|                |   | -0.181176732 | 0.131775312  | -0.114182273 | -0.176003211 | -0.041054678 | -0.230481228 |
|                |   | -0.354645084 | -0.307051826 | -0.180026187 | 0.005480815  | 0.082467179  | 0.181223276  |
|                |   | 0.059806709  | 0.015682059  | -0.156695595 | -0.182433219 | -0.097111892 | -0.233103669 |
|                |   | 0.120128137  | 0.00783849   | -0.209128299 | -0.158265103 |              |              |
| TCGA-HU-8602   | A | -0.286898206 | 0.435912327  | 0.499905458  | 0.344446102  | 0.078065475  |              |
|                |   | 0.062851902  | 0.291963212  | 0.476195396  | -0.01420538  | 0.097493769  | 0.053862371  |
|                |   | -0.219109344 | -0.258465711 | 0.28813579   | 0.42249024   | 0.418748101  | 0.300407781  |
|                |   | 0.390642546  | 0.404905924  | 0.104818962  | 0.156664765  | 0.15981369   | -0.3490813   |
|                |   | 0.194915109  | 0.142326276  | 0.268091918  |              |              |              |
| TCGA-HU-8604   | B | 0.063750811  | 0.332131022  | 0.434364933  | 0.492163907  | 0.043206917  |              |
|                |   | 0.40703789   | 0.281990676  | 0.086358595  | -0.167935659 | 0.031056789  | -0.046531866 |
|                |   | 0.041609035  | 0.294214896  | 0.478204009  | 0.34623837   | 0.337194009  | 0.388774612  |
|                |   | 0.28716621   | 0.191284097  | 0.533818407  | 0.070237315  | -0.060706637 | 0.121491825  |
|                |   | 0.25935159   | 0.584125148  | 0.602106778  |              |              |              |
| TCGA-HU-8608   | A | -0.18164088  | 0.241561316  | 0.45117509   | 0.563479471  | 0.06212345   |              |
|                |   | 0.412499198  | 0.405109677  | 0.492791804  | -0.118196248 | -0.083928716 | 0.037742901  |
|                |   | -0.027971939 | 0.301650929  | 0.581013236  | 0.5092417    | 0.52330813   | 0.452610233  |
|                |   | 0.466933595  | 0.411522372  | 0.577587906  | 0.183890124  | 0.171962031  | -0.252887089 |
|                |   | 0.012527425  | 0.664508404  | 0.659489224  |              |              |              |
| TCGA-HU-8610   | B | 0.146306646  | -0.279678947 | -0.241636716 | -0.437855731 | 0.02402299   |              |
|                |   | 0.393528631  | 0.360905533  | 0.367674469  | 0.026009224  | 0.164006456  | 0.308299969  |

|              |   |              |              |              |              |              |              |
|--------------|---|--------------|--------------|--------------|--------------|--------------|--------------|
|              |   | 0.267230171  | 0.143111407  | -0.017459788 | 0.315084836  | 0.443498242  | 0.251003106  |
|              |   | 0.40239706   | 0.307538979  | 0.311321132  | 0.191390675  | 0.182384756  | 0.083801813  |
|              |   | -0.096876141 | 0.304138639  | 0.434234189  |              |              |              |
| TCGA-HU-A4G2 | A | -0.033472436 | 0.220562564  | 0.439227958  | 0.582608712  |              |              |
|              |   | -0.277255372 | 0.092523553  | -0.060154858 | 0.011604942  | -0.355891431 | -0.201357242 |
|              |   | -0.202967992 | -0.044641638 | -0.077421025 | 0.342265524  | -0.228738702 | -0.118794951 |
|              |   | -0.029400055 | -0.301909721 | -0.381547439 | 0.204202479  | -0.180298295 | -0.068487091 |
|              |   | -0.416669111 | -0.01753107  | 0.336900777  | 0.484202691  |              |              |
| TCGA-HU-A4G3 | A | 0.243476573  | -0.647211332 | -0.473285494 | -0.613158874 | 0.120235371  |              |
|              |   | -0.329356759 | -0.264564693 | -0.235804537 | 0.107241012  | 0.097436014  | 0.216001292  |
|              |   | 0.233426246  | -0.257949974 | -0.511043071 | -0.33673598  | -0.359019093 | -0.377543628 |
|              |   | -0.38857458  | -0.366423039 | -0.463431403 | -0.122372034 | 0.098313703  | -0.087739391 |
|              |   | 0.072006996  | -0.596162687 | -0.629057155 |              |              |              |
| TCGA-HU-A4G8 | A | -0.32024721  | 0.580823559  | 0.356009479  | 0.413780875  | -0.16353924  |              |
|              |   | -0.115008577 | 0.036895995  | 0.182353869  | -0.051260364 | -0.178894122 | -0.246253467 |
|              |   | -0.357342813 | -0.157321815 | 0.406683991  | 0.186078121  | 0.248945381  | 0.107858385  |
|              |   | 0.096148582  | 0.204322134  | 0.42494818   | -0.092525952 | -0.050084546 | -0.324380187 |
|              |   | -0.275213232 | 0.43199045   | 0.417015873  |              |              |              |
| TCGA-HU-A4GC | A | 0.247227669  | -0.50708978  | -0.260100264 | -0.460456011 | 0.013531467  |              |
|              |   | -0.271206742 | -0.253090573 | -0.350339969 | -0.02106784  | 0.142261881  | 0.012241899  |
|              |   | 0.00829256   | -0.164379086 | -0.421968266 | -0.332775557 | -0.384375802 | -0.377512384 |
|              |   | -0.439474097 | -0.469674127 | -0.358587663 | -0.235255024 | -0.174447172 | -0.213174864 |
|              |   | -0.019259457 | -0.429459107 | -0.488550521 |              |              |              |
| TCGA-HU-A4GD | A | -0.083895741 | -0.25053376  | -0.262637675 | -0.224352749 |              |              |
|              |   | -0.308951629 | -0.09249278  | -0.411648129 | -0.460500286 | -0.351967196 | -0.415286247 |
|              |   | -0.474610877 | -0.397100216 | -0.43075669  | -0.194834041 | -0.270230845 | -0.365473344 |
|              |   | -0.24707181  | -0.466235045 | -0.480890061 | -0.514862847 | -0.362602473 | -0.460377241 |
|              |   | -0.113352953 | -0.269086793 | -0.496381872 | -0.488806172 |              |              |
| TCGA-HU-A4GF | A | -0.016896508 | 0.283553051  | 0.175225493  | 0.508211548  |              |              |
|              |   | -0.105638513 | -0.147438059 | -0.041282184 | 0.110326521  | -0.013335736 | -0.218395007 |
|              |   | -0.308910579 | -0.429326124 | -0.186123502 | 0.053064595  | -0.05598607  | 0.073526495  |
|              |   | 0.033744432  | -0.021157615 | -0.157933228 | -0.317570661 | -0.105084428 | -0.143391297 |
|              |   | -0.256740679 | -0.301908831 | -0.13605165  | 0.046687907  |              |              |
| TCGA-HU-A4GH | A | 0.214013807  | -0.472732848 | -0.206762048 | -0.477618076 | 0.028422098  |              |
|              |   | -0.215334431 | -0.189664296 | -0.268569793 | 0.027719367  | 0.07102892   | -0.029326157 |
|              |   | -0.083219681 | -0.370945596 | -0.411071803 | -0.208670149 | -0.334101534 | -0.280262187 |
|              |   | -0.384781123 | -0.334759599 | -0.393117232 | -0.196712161 | -0.078239344 | -0.153266085 |
|              |   | -0.177899206 | -0.583148486 | -0.572611178 |              |              |              |
| TCGA-HU-A4GJ | A | -0.278244881 | 0.116354158  | -0.002749979 | 0.258020066  | 0.041605239  |              |
|              |   | 0.263624917  | 0.27603982   | 0.028479222  | -0.071229314 | -0.093863097 | -0.255971229 |
|              |   | -0.375500381 | 0.301438242  | 0.275784881  | 0.286974068  | 0.164980456  | 0.360430076  |
|              |   | 0.445030408  | 0.490434751  | 0.627809526  | -0.119931947 | -0.073686142 | -0.136967081 |
|              |   | -0.199076038 | 0.683599234  | 0.589599724  |              |              |              |
| TCGA-HU-A4GP | A | 0.19402675   | -0.561922443 | -0.372064658 | -0.442112424 | 0.221919827  |              |

-0.265629858 -0.092217002 -0.225880111 0.220061459 0.177186605 0.207556573  
 0.098844378 -0.138591976 -0.49709719 -0.19300657 -0.262257648 -0.425505188  
 -0.288402705 -0.195326818 -0.404835188 -0.051244607 0.03693047 0.069650826  
 0.112316813 -0.571393834 -0.613918646  
 TCGA-HU-A4GQ B -0.008878032 -0.032177753 0.290453993 0.278223938 -0.06706246  
 -0.088955011 -0.238226753 -0.221780811 0.052556135 0.027421959 -0.016668562  
 0.191832591 0.101152392 0.327625961 -0.050621884 0.017740891 -0.160613488  
 -0.326393863 -0.347158653 -0.013896965 -0.092296319 -0.124245709 -0.159460763  
 -0.063050104 0.058806221 0.228643346  
 TCGA-HU-A4GT A 0.278391907 0.461728606 0.301678818 0.359812165  
 -0.203500224 -0.202893568 -0.171166922 -0.072704733 -0.057950179 -0.226754558  
 -0.309122975 -0.430885722 -0.392686301 -0.071749509 -0.165642276 0.029052181  
 -0.175253752 -0.224592058 -0.238790253 -0.166928282 -0.152480032 -0.074041219  
 -0.165239614 -0.206353519 -0.252993678 -0.100119033  
 TCGA-HU-A4GU A -0.067734586 0.406406274 0.463814998 0.391647977  
 -0.263978002 -0.315229115 -0.332655213 -0.119817001 0.011151936 -0.213074232  
 -0.27320548 -0.372400802 -0.439369665 -0.296601967 -0.062515929 -0.099312755  
 -0.167012898 -0.077143964 -0.211433358 -0.508658724 -0.164997676 -0.161905166  
 -0.209836331 -0.382614481 -0.536516395 -0.519268957  
 TCGA-HU-A4GX A -0.245875027 0.175319808 0.117532605 0.272777496  
 -0.231794898 0.158001553 -0.028387249 -0.103062281 -0.276965043 -0.356860966  
 -0.420359904 -0.496912083 0.047344824 0.438799835 0.105522608 -0.057483249  
 0.275947226 0.014482834 -0.100603503 0.515402043 -0.306543618 -0.317568284  
 -0.243286884 -0.201884722 0.673425108 0.646977447  
 TCGA-HU-A4GY B -0.043828354 -0.545710937 -0.291457282 -0.514756475 0.17242851  
 -0.051857203 0.024899417 -0.124731731 0.074392498 0.098835627 0.081350721  
 0.07538208 0.166360832 -0.204021544 -0.078276094 -0.143475272 -0.108473456  
 -0.013407046 -0.016522925 0.133274331 -0.069720414 0.004462056 0.173150966  
 0.101412153 -0.023307941 -0.288674058  
 TCGA-HU-A4H0 A -0.297359604 0.512852038 0.615880126 0.664627062  
 -0.086754656 0.002214278 0.064084067 0.336432288 -0.056063087 -0.146654813  
 -0.242853971 -0.354384448 -0.000574337 0.56380831 0.16654488 0.215979686  
 0.269041766 0.317389617 0.251609561 0.483647013 0.045448335 0.247316239  
 -0.241831168 0.005452688 0.70253512 0.649019305  
 TCGA-HU-A4H2 A -0.054429753 0.111661035 -0.05699794 0.209917155  
 -0.076886363 0.031208741 -0.051670775 0.070494824 -0.109748564 -0.263378077  
 -0.286043861 -0.1345635 -0.193681889 0.085265252 -0.243020161 0.152490933  
 -0.051076118 -0.205314898 -0.228320893 0.043749493 -0.109294815 -0.192662143  
 -0.069825214 -0.193335135 0.018089112 0.264966355  
 TCGA-HU-A4H3 A -0.084032107 0.342682558 0.396317656 0.153152239 0.036021828  
 -0.073502605 -0.113498902 -0.035009486 -0.093698015 -0.001390326 -0.115023937  
 -0.035742453 -0.276753568 -0.017925816 -0.039727145 0.246415899 0.137942048  
 -0.06654645 -0.15705088 -0.350774381 -0.021858594 -0.257015364 -0.025786638  
 -0.190916941 -0.365104299 -0.105417598

TCGA-HU-A4H4 A -0.372735774 0.445073706 0.346395136 0.336522588  
-0.208531437 0.284205277 0.200792955 0.242653009 -0.265084783 -0.315354071  
-0.254513818 -0.239271473 0.075693708 0.52082761 0.234938182 0.362310891  
0.341006438 0.181278493 0.156529365 0.433541992 -0.212058264 -0.209308436  
-0.470311467 -0.36457391 0.666390002 0.660792477

TCGA-HU-A4H5 A -0.251614256 0.159030636 0.354401325 0.176942662  
-0.227269584 -0.275020449 -0.211741252 -0.079706966 -0.062545833 -0.24983668  
-0.312191928 -0.325045666 -0.292287853 -0.206354599 -0.210030494 -0.147068695  
-0.214687156 -0.220966755 -0.303572845 -0.353801577 -0.142652104 -0.242587511  
-0.139245177 -0.130381608 -0.359224172 -0.404278442

TCGA-HU-A4H6 A 0.089840647 -0.215633373 0.072827714 0.116892256 -0.17140388  
0.324065383 0.118319808 -0.128369064 -0.164525445 -0.254690999 -0.228333717  
-0.126862741 0.259729119 0.000751997 -0.103126994 0.10792969 0.061250528  
-0.217347818 0.016286439 0.28828161 -0.110204982 -0.28505153 -0.11015793  
-0.184291258 0.116365226 0.266546707

TCGA-HU-A4H8 A -0.011479519 0.288417949 0.357445797 0.294073736  
-0.203904815 -0.328225862 -0.303444528 0.227611837 -0.128563371 0.032042557  
-0.337324453 -0.460613281 -0.216925991 0.325037897 -0.026173256 0.031505453  
-0.061342232 -0.112851338 -0.146125793 0.063336329 -0.084978269 -0.100288084  
-0.328866264 -0.155424467 0.363421386 0.367025295

TCGA-HU-A4HB B 0.339754947 -0.616288433 -0.362213925 -0.526832989 0.187424289  
-0.053286987 0.080735324 -0.151318518 0.17443009 0.085490136 0.113477155  
0.044756652 0.085002713 -0.233384408 -0.091856342 -0.13595782 -0.128554914  
-0.013515968 0.027574157 0.289672422 -0.090232517 0.015786678 -0.021087217  
-0.032593673 0.042842937 -0.225688931

TCGA-HU-A4HD A 0.098573432 0.169871872 -0.013037063 0.035813442  
-0.173900106 -0.173016059 -0.180862263 -0.338170596 -0.113625705 -0.103335669  
-0.144245472 0.000658873 -0.226433219 -0.50824669 -0.318705525 -0.168195017  
-0.293268373 -0.181583213 -0.247412629 -0.439453682 -0.086959483 -0.229894921  
-0.049232477 -0.040171467 -0.544977804 -0.56609352

TCGA-IN-7806 A 0.248688692 -0.195393111 -0.177559886 -0.532820011 0.038946129  
-0.459480652 -0.282467217 -0.062085631 0.228146213 -0.177990456 -0.270521039  
-0.443851146 -0.446108967 -0.463749139 -0.218359413 -0.329143932 -0.329474041  
-0.222203568 -0.063033256 -0.537338004 -0.034383994 -0.003768204 0.068864674  
-0.138813991 -0.545640081 -0.583529378

TCGA-IN-7808 A -0.304404083 -0.186371405 -0.161460624 -0.134857752 -0.0335831  
0.248428366 0.187480482 -0.174545067 -0.185899694 -0.277076794 -0.351038131  
-0.368146955 0.244002179 0.126245474 0.170020594 -0.009258557 0.30033317  
0.324569323 0.311177405 0.602853668 -0.174540768 -0.092380469 0.053799249  
-0.209310449 0.58815892 0.550018843

TCGA-IN-8462 A 0.22106286 -0.518159399 -0.309920775 -0.5765638 0.1467491  
-0.109476473 -0.201255337 -0.066788189 0.145978555 -0.032049392 -0.149045003  
-0.158098298 -0.248969508 -0.444119179 0.001822687 -0.216131427 -0.200142545  
-0.09269751 -0.043598826 -0.403383639 0.005168692 -0.035127681 0.08757846

|                |              |              |              |              |              |
|----------------|--------------|--------------|--------------|--------------|--------------|
|                | 0.083522023  | -0.377200196 | -0.382174192 |              |              |
| TCGA-IN-8663 A | -0.099301259 | -0.116114724 | 0.440124379  | 0.108043159  | 0.00187074   |
|                | -0.436208343 | -0.308643176 | 0.010552609  | 0.19033677   | -0.04905193  |
|                | -0.30712743  | -0.456620481 | -0.510148891 | -0.123966107 | -0.077070015 |
|                | -0.18336043  | -0.110007904 | -0.696362871 | 0.034741647  | 0.218171711  |
|                | 0.122673759  | -0.69209918  | -0.671250771 |              | -0.086351402 |
| TCGA-IN-A6RI A | 0.27407697   | 0.398701042  | 0.262321594  | 0.315845367  | -0.253516579 |
|                | -0.369300538 | -0.309360777 | -0.075443213 | -0.163931309 | -0.334069797 |
|                | -0.471073039 | -0.449665702 | -0.130333825 | -0.319824117 | -0.215953795 |
|                | -0.359103056 | -0.338138664 | -0.336368549 | -0.241038394 | -0.234388973 |
|                | -0.226697105 | -0.393606251 | -0.438035074 |              | -0.351200009 |
| TCGA-IN-A6RJ A | 0.156040761  | -0.365601766 | 0.009125781  | -0.289396316 | -0.103756767 |
|                | -0.156262378 | -0.217002111 | -0.268847025 | 0.050594907  | -0.115253986 |
|                | -0.370580154 | -0.30608194  | -0.221807788 | 0.001398397  | -0.176523169 |
|                | -0.242807778 | -0.208287858 | -0.351848818 | -0.046283503 | -0.001510096 |
|                | -0.066663441 | -0.380681783 | -0.41495193  |              | 0.190263207  |
| TCGA-IN-A6RL A | 0.201781447  | -0.052581961 | -0.239108528 | -0.329265064 | -0.085893366 |
|                | -0.176515484 | -0.21106524  | -0.067458514 | -0.080361647 | -0.05361392  |
|                | -0.302136803 | -0.194933997 | -0.107428934 | -0.157032664 | -0.175401152 |
|                | -0.282556383 | -0.204021249 | -0.218309296 | -0.078439869 | -0.045034389 |
|                | 0.037622442  | -0.336313128 | -0.386034683 |              | -0.324899314 |
| TCGA-IN-A6RRA  | -0.093638053 | -0.308250979 | -0.3886591   | -0.448809111 | -0.102519274 |
|                | -0.111297685 | -0.315380571 | -0.243964542 | -0.308580805 | -0.36531335  |
|                | -0.276870253 | -0.360868738 | -0.114227596 | -0.134987363 | -0.272089977 |
|                | -0.304539489 | -0.401994814 | -0.420029415 | -0.268398259 | -0.229313642 |
|                | -0.058701709 | -0.480873167 | -0.330063067 |              | -0.359632948 |
| TCGA-IN-A6RS A | 0.069263344  | -0.158009116 | 0.167238176  | 0.304293864  | -0.132031402 |
|                | 0.165114117  | 0.037884632  | 0.018526199  | 0.00737236   | -0.3362606   |
|                | -0.196613763 | -0.050117431 | 0.434566287  | 0.00386921   | -0.15626485  |
|                | 0.030579024  | 0.103745222  | 0.088917424  | 0.273843295  | 0.32759382   |
|                | -0.237112411 | 0.431839592  | 0.402876842  | 0.033333914  | -0.247884574 |
| TCGA-IN-A7NRA  | 0.101366344  | -0.277671587 | -0.218531129 | -0.28949538  | -0.056353219 |
|                | 0.057649952  | -0.028102107 | -0.322637458 | 0.076672852  | -0.058218799 |
|                | -0.010346299 | 0.27899952   | -0.319422124 | -0.187948517 | -0.129804549 |
|                | -0.13737645  | -0.073134926 | 0.097399508  | -0.05489552  | -0.120539455 |
|                | -0.044092946 | -0.087704661 | -0.188994703 | -0.019952821 | 0.131638993  |
| TCGA-IN-A7NTB  | -0.369402749 | 0.313379615  | 0.468656634  | 0.398597265  | -0.008240138 |
|                | -0.227082773 | -0.209653519 | 0.01096079   | 0.221723373  | 0.039316065  |
|                | -0.024350378 | -0.365826713 | -0.278796225 | 0.035219524  | -0.160676872 |
|                | -0.104026134 | -0.125294965 | -0.540354973 | 0.299312815  | -0.160676872 |
|                | 0.003988272  | -0.582208757 | -0.505065895 | 0.188461219  | 0.125464779  |
| TCGA-IN-A7NU A | -0.204644636 | -0.324971397 | 0.094658966  | -0.423544546 |              |
|                | -0.043546731 | 0.276478104  | 0.05493833   | -0.080005779 | -0.097230842 |
|                | 0.076635302  | 0.193924619  | 0.299620667  | -0.01460014  | -0.120751071 |
|                |              |              | 0.314719813  |              | 0.193879261  |

|                |              |              |              |              |              |              |
|----------------|--------------|--------------|--------------|--------------|--------------|--------------|
|                | 0.178555672  | -0.049835843 | -0.139222165 | 0.341247139  | -0.030892457 | -0.086412355 |
|                | 0.024534921  | 0.091161398  | 0.532972859  | 0.531634705  |              |              |
| TCGA-IN-AB1VA  | 0.193186965  | -0.395504783 | -0.214078311 | -0.456180307 | 0.0539358    |              |
|                | -0.383041009 | -0.249201392 | -0.095010599 | 0.244126211  | -0.027719122 | -0.092225377 |
|                | -0.208279726 | -0.34983177  | -0.438907705 | -0.160708788 | -0.256401945 | -0.269143708 |
|                | -0.082533769 | -0.043786135 | -0.535805299 | 0.004846148  | 0.157955234  | 0.115893873  |
|                | -0.005839638 | -0.533960548 | -0.582064091 |              |              |              |
| TCGA-IN-AB1XA  | -0.045438315 | -0.405934348 | 0.05915236   | -0.259869928 | 0.094962993  |              |
|                | -0.133597346 | -0.058629104 | 0.078528808  | 0.205498752  | -0.006118381 | -0.158515157 |
|                | -0.330397239 | -0.385966857 | -0.470471037 | 0.127704297  | 0.163492377  | -0.06609033  |
|                | 0.067214085  | 0.105318231  | -0.48029885  | 0.086322024  | 0.235873427  | 0.129772079  |
|                | 0.193969557  | -0.534885817 | -0.521113985 |              |              |              |
| TCGA-IP-7968 B | 0.25350293   | -0.477503708 | -0.222384432 | -0.56841866  | 0.257863582  |              |
|                | -0.053372817 | 0.016575505  | 0.089890159  | 0.397386127  | 0.171053725  | 0.29942257   |
|                | 0.140286102  | 0.05064988   | -0.298229054 | 0.000588559  | 0.03030763   | -0.010583058 |
|                | 0.159571259  | 0.210627175  | -0.242923024 | 0.273541024  | 0.339161842  | 0.233056748  |
|                | 0.287895265  | -0.4017951   | -0.378208293 |              |              |              |
| TCGA-KB-A6F7A  | -0.010007592 | 0.478666598  | 0.219763983  | 0.35362916   | -0.138011745 |              |
|                | -0.116836802 | 0.049088692  | -0.190777528 | -0.238346416 | -0.185830323 | -0.354867867 |
|                | -0.453435476 | -0.179943406 | 0.080116983  | -0.007706839 | 0.174245435  | -0.004625183 |
|                | 0.026177687  | -0.081113463 | -0.011554148 | -0.180998107 | -0.255321157 | -0.287584308 |
|                | -0.306803347 | -0.088354609 | 0.055642824  |              |              |              |
| TCGA-KB-A93G B | -0.121867284 | -0.457280618 | -0.334919675 | -0.429689212 | 0.329180374  |              |
|                | 0.282104297  | 0.356349559  | 0.284233445  | 0.134727778  | 0.416255491  | 0.455072393  |
|                | 0.556898658  | 0.118490133  | -0.306033974 | 0.385750589  | 0.424908042  | 0.116932425  |
|                | 0.21362949   | 0.278779652  | -0.165012731 | 0.260455169  | 0.403162414  | 0.046970088  |
|                | 0.343139459  | -0.363746687 | -0.093786325 |              |              |              |
| TCGA-KB-A93H A | 0.196153402  | 0.446913848  | 0.298447904  | 0.446061475  |              |              |
|                | -0.314539082 | -0.288328251 | -0.362327545 | -0.317485413 | -0.32908059  | -0.355319142 |
|                | -0.440469239 | -0.419678192 | -0.392242784 | -0.225959649 | -0.246227214 | -0.168292184 |
|                | -0.325369037 | -0.318293814 | -0.406657397 | -0.32732561  | -0.369591706 | -0.375563745 |
|                | -0.418411327 | -0.407026326 | -0.21459368  | -0.384576277 |              |              |
| TCGA-KB-A93J A | -0.096207388 | 0.177251443  | 0.329340057  | 0.370902516  | -0.176071399 |              |
|                | -0.196910853 | 0.062138337  | 0.093211925  | -0.153410828 | -0.206037184 | -0.266312299 |
|                | -0.374130719 | -0.12325826  | 0.437728793  | 0.233568649  | 0.059266507  | 0.235840929  |
|                | 0.267343784  | 0.176028916  | 0.161418565  | -0.166555439 | -0.044274515 | -0.400940017 |
|                | -0.3088746   | 0.313921321  | 0.374414855  |              |              |              |
| TCGA-MX-A5UG B | 0.090622051  | -0.497184713 | -0.331329891 | -0.502181726 | 0.304749743  |              |
|                | 0.340178324  | 0.426959318  | 0.318238103  | 0.31930041   | 0.402245525  | 0.443952486  |
|                | 0.531812959  | 0.436611933  | -0.20456066  | 0.306875801  | 0.169783113  | 0.350820095  |
|                | 0.498157561  | 0.537154457  | 0.437247894  | 0.313781395  | 0.326126304  | 0.473204533  |
|                | 0.196295691  | 0.295603434  | 0.276154288  |              |              |              |
| TCGA-MX-A5UJ B | 0.40129489   | 0.290706223  | 0.037445944  | -0.349565147 |              |              |
|                | -0.114300212 | -0.089561645 | -0.065812089 | -0.160539951 | -0.131481557 | 0.119094569  |

-0.003398736 0.188927086 -0.230157449 -0.389395733 -0.214323895 -0.079669879  
 -0.280157344 -0.381696534 -0.238960392 -0.227390241 -0.156594029 -0.267550141  
 -0.080248383 -0.178784774 -0.428313075 -0.486473064  
 TCGA-MX-A663 B 0.474124425 -0.247567748 -0.129623863 -0.053105941 0.133926864  
 -0.191016152 -0.167516033 -0.421891011 0.132068824 0.378845526 0.296325953  
 0.301345595 -0.039787626 -0.582399373 -0.35849494 -0.371483856 -0.437865976  
 -0.332543517 -0.308625887 -0.427800257 0.077864456 0.051347771 0.410050695  
 0.291510833 -0.557063238 -0.550401544  
 TCGA-MX-A666 A 0.022851336 0.253893333 -0.06235938 0.320111048  
 -0.138538798 -0.351436005 -0.230653204 -0.309314099 -0.114493942 -0.199411563  
 -0.326270515 -0.286140314 -0.24474889 -0.470765102 -0.394105545 -0.309834513  
 -0.32863007 -0.216195381 0.031518272 -0.408608948 -0.145860924 -0.11613391  
 0.04419062 -0.151591246 -0.619641496 -0.637045067  
 TCGA-R5-A7O7 A 0.104266506 -0.043722181 -0.370191354 -0.206624147 -0.10882352  
 0.250374851 -0.083848783 -0.290198978 -0.236431143 -0.295664356 -0.143597013  
 0.093106317 -0.120037029 -0.158354102 -0.276350965 -0.047584364 -0.19876971  
 -0.233003871 -0.330269804 0.111027011 -0.187380241 -0.238203042 -0.023195489  
 0.05268372 -0.344145685 -0.220532712  
 TCGA-R5-A7ZFA -0.223851124 0.288756991 0.462882907 0.57799518 -0.220773584  
 -0.283811316 -0.313919475 -0.252450019 -0.085889874 -0.216725013 -0.349355909  
 -0.434283454 -0.419531195 -0.172740124 -0.180705641 0.021655983 -0.302641688  
 -0.350248839 -0.32648839 -0.496916319 -0.201757791 -0.285778589 -0.081768498  
 -0.179630454 -0.349557189 -0.319141927  
 TCGA-R5-A7ZRA 0.300601351 0.329742785 0.135606341 0.345029684 -0.295960189  
 0.023531957 -0.049714318 -0.17305089 -0.334170299 -0.393685103 -0.308230776  
 -0.344643285 -0.253017727 -0.009775953 -0.252001065 -0.285133221 -0.232823031  
 -0.260850241 -0.260758841 -0.096229152 -0.273446875 -0.269618902 -0.368237941  
 -0.296040255 -0.055698873 -0.179343308  
 TCGA-R5-A805A 0.24193844 -0.54740417 -0.526296011 -0.405046177 0.170102465  
 0.473810329 0.356626428 0.285031326 -0.11108993 0.140825118 0.314203993  
 0.468611036 0.328616489 0.193126311 0.395976891 0.420285665 0.368049084  
 0.175969358 0.240274876 0.287718768 0.219213059 0.119421905 -0.003030615  
 0.258368112 0.287449852 0.363199457  
 TCGA-RD-A7BS B 0.041673614 -0.541647493 -0.444743019 -0.565321717 0.007206144  
 0.313178405 -0.118255006 -0.311820275 -0.138435771 -0.0000675 -0.111467114  
 0.103636392 0.099251694 0.147641847 -0.018952584 0.036845412 0.095329654  
 -0.305207336 -0.172340095 0.004935032 -0.124732284 -0.310761361 0.085237232  
 0.019002928 -0.081749641 0.05859763  
 TCGA-RD-A7BT A 0.14235254 0.460349587 0.543060018 0.570376143  
 -0.290879594 -0.274946312 -0.300219349 -0.22204108 -0.116501638 -0.211206576  
 -0.403068837 -0.542279542 -0.308190868 -0.178010837 -0.238816529 -0.121543697  
 -0.230765994 -0.122510412 -0.282438238 -0.397497209 -0.252418965 -0.125566677  
 -0.418270138 -0.291194169 -0.331768406 -0.283409736  
 TCGA-RD-A7BW B -0.22626256 -0.678386633 -0.405345039 -0.587231789 0.100364434

|              |              |              |              |              |              |
|--------------|--------------|--------------|--------------|--------------|--------------|
| 0.215218005  | 0.094435712  | -0.279878346 | 0.025053218  | 0.222069476  | 0.211106402  |
| 0.28531575   | 0.295236336  | 0.271874414  | 0.184376765  | 0.025407626  | 0.182134355  |
| 0.066359693  | -0.147197871 | 0.24202017   | -0.093937946 | -0.157550843 | 0.099378731  |
| -0.005402444 | 0.402439806  | 0.262530211  |              |              |              |
| TCGA-RD-A7C1 | A            | 0.072220588  | 0.008929938  | 0.110186892  | 0.137612794  |
| -0.288869594 | 0.278838281  | -0.056691733 | -0.2738808   | -0.326622056 | -0.308916807 |
| -0.349431753 | -0.178633275 | -0.088514187 | 0.165678805  | -0.04875667  | -0.167625684 |
| 0.104691278  | -0.290545372 | -0.447280448 | 0.218845137  | -0.28193138  | -0.337155626 |
| -0.217789019 | -0.087086491 | 0.35896519   | 0.400271062  |              |              |
| TCGA-RD-A8MV | A            | 0.029838561  | -0.001538762 | -0.300854269 | -0.097064946 |
| -0.101703327 | 0.463587067  | 0.364230933  | 0.279004807  | -0.155048323 | -0.178279216 |
| -0.172553694 | -0.233064403 | 0.412654446  | 0.542028129  | 0.363881885  | 0.491230591  |
| 0.432795906  | 0.300340034  | 0.394542765  | 0.645201435  | -0.016767929 | -0.118057772 |
| -0.196852384 | -0.100539302 | 0.73164621   | 0.750838885  |              |              |
| TCGA-RD-A8MW | B            | 0.075860958  | -0.289316791 | -0.319968529 | -0.458904507 |
| 0.045815514  | 0.415695849  | 0.294132912  | -0.202322692 | -0.147573057 | -0.076448262 |
| 0.137350932  | 0.369919875  | 0.447594307  | 0.232597147  | 0.188535412  | 0.318812784  |
| 0.236581989  | 0.182479517  | 0.072068604  | 0.479600095  | -0.008715441 | -0.03670689  |
| -0.005584329 | 0.149965667  | 0.5277246    | 0.484515548  |              |              |
| TCGA-RD-A8N0 | B            | -0.154253521 | -0.584956094 | -0.443991138 | -0.513391404 |
| 0.040512625  | 0.395690939  | 0.249813607  | -0.178317323 | -0.167102054 | 0.155531169  |
| -0.064599873 | 0.068383322  | 0.421435161  | 0.205834974  | 0.03332128   | -0.057275961 |
| 0.259792571  | 0.209523775  | 0.249032384  | 0.601829525  | -0.113019014 | -0.146527531 |
| 0.027975629  | 0.103226071  | 0.558867833  | 0.53013817   |              |              |
| TCGA-RD-A8N1 | B            | -0.119680731 | 0.003998146  | -0.123850582 | 0.050012839  |
| 0.011204912  | 0.223842028  | 0.312417891  | 0.132119363  | -0.035099414 | -0.255606299 |
| -0.038446424 | 0.066405221  | 0.401976068  | 0.411292671  | 0.282243986  | 0.358347575  |
| 0.343298707  | 0.43005222   | 0.371168612  | 0.630828078  | -0.013434942 | -0.078386256 |
| 0.13834539   | -0.13954534  | 0.717292755  | 0.720026974  |              |              |
| TCGA-RD-A8N2 | B            | -0.148614504 | -0.647932689 | -0.343433053 | -0.58119354  |
| 0.212475621  | -0.024102838 | 0.11433464   | -0.169561535 | 0.263331273  | 0.201148723  |
| 0.344680708  | 0.385273999  | 0.098461589  | -0.291913773 | -0.132015524 | -0.213761606 |
| -0.177254053 | -0.109617628 | -0.129538776 | -0.030001189 | 0.046315337  | 0.157535945  |
| 0.201279252  | 0.149174631  | -0.119577041 | -0.361848992 |              |              |
| TCGA-RD-A8N4 | B            | 0.021226475  | -0.601225837 | -0.293676244 | -0.584129439 |
| 0.172265084  | -0.111072296 | 0.057696693  | -0.228771877 | 0.095893308  | -0.057203761 |
| 0.138787897  | 0.119753075  | 0.097920496  | -0.25953068  | -0.094694385 | -0.1258431   |
| -0.221292957 | -0.029197359 | -0.147150144 | 0.026408742  | -0.130492315 | 0.106740161  |
| -0.066304067 | 0.013226682  | 0.000718978  | -0.147359164 |              |              |
| TCGA-RD-A8N5 | B            | 0.041776165  | -0.421043413 | -0.242130943 | -0.331615194 |
| 0.185439429  | 0.290202297  | 0.151526999  | 0.037994576  | -0.080777538 | 0.07915065   |
| 0.292837813  | 0.48798465   | 0.157624296  | -0.22696704  | 0.188186951  | 0.377877529  |
| 0.140386137  | -0.299042407 | -0.116049485 | -0.179593631 | 0.127217503  | 0.130997813  |
| 0.056020524  | 0.292037381  | -0.100268101 | -0.024563554 |              |              |

TCGA-RD-A8N6 B 0.130689701 -0.344575583 -0.129574663 -0.280298341  
-0.075986241 -0.370013802 -0.340035521 -0.450623769 0.081031929 -0.00345407  
-0.148994974 -0.163837109 -0.384164573 -0.497391501 -0.345835159 -0.382780258  
-0.399551011 -0.382011615 -0.43445325 -0.587911667 -0.126825808 0.009096933  
0.166658226 0.044332428 -0.673791935 -0.710313261

TCGA-RD-A8N9 B -0.131311608 -0.488957496 -0.346834361 -0.314500055 0.071054153  
0.295027757 0.170383334 -0.146511947 0.006180037 0.255450708 0.258155201  
0.522022293 0.34087786 0.241644057 0.049236863 0.040294727 0.067398214  
-0.00262003 -0.018630197 0.289221472 0.081551259 -0.147849735 0.222197045  
-0.004827403 0.29110153 0.281053311

TCGA-RD-A8NB B -0.219728632 0.185067721 0.309243039 -0.069639272 0.144556428  
0.122999514 0.303658951 0.369095704 0.189827441 0.35044555 0.140398298  
0.021693734 0.300036201 0.479390552 0.345162437 0.40130576 0.392633429  
0.321326284 0.361846829 0.304686549 0.185705736 0.138107282 0.038786557  
-0.08138087 0.522601821 0.632133283

TCGA-SW-A7EB A 0.403236471 -0.110319901 -0.318653599 -0.193201143 -0.12488886  
0.050436755 -0.097523164 -0.491962347 -0.176042315 0.01455969 -0.268679025  
-0.172830836 0.106235645 -0.306244741 -0.37480085 -0.267446535 -0.228751325  
-0.150103782 -0.263406435 0.055286959 -0.158897718 -0.152161706 0.204856455  
-0.077907243 -0.26265946 -0.150050608

TCGA-VQ-A8DT A 0.332868943 0.081289209 0.09412078 0.233026596 -0.24027128  
-0.205354472 -0.332556081 -0.224402306 -0.275333077 -0.284212007 -0.383824906  
-0.365066407 -0.373663413 -0.029534552 -0.303421588 -0.272197797 -0.176994864  
-0.392373897 -0.405817953 -0.473818781 -0.278573489 -0.321121069 -0.27148078  
-0.182839295 -0.378628809 -0.23710656

TCGA-VQ-A8DU A -0.073744665 -0.292560114 -0.162404692 -0.180422221  
-0.261841126 0.022276887 -0.271360818 -0.373990708 -0.223790396 -0.204473379  
-0.319303458 0.047057354 -0.207464513 -0.129133427 -0.23799601 -0.252481347  
-0.260792726 -0.402596172 -0.446616829 -0.261196412 -0.266580299 -0.41414956  
0.178173245 -0.201174551 -0.349249635 -0.341229539

TCGA-VQ-A8DV A 0.306035642 -0.143333255 0.137524017 0.227839771  
-0.267681663 -0.214936869 -0.30902465 -0.451514926 -0.193949865 -0.165049214  
-0.259127479 -0.192099369 -0.404678777 -0.469797098 -0.463149946 -0.366780459  
-0.394481196 -0.493091927 -0.484533461 -0.62002611 -0.307093641 -0.238383245  
-0.294046679 -0.138853968 -0.69388847 -0.636231803

TCGA-VQ-A8DZ A 0.19015555 0.17379563 -0.122501822 0.03927911  
-0.269845537 -0.165690612 -0.29745946 -0.334840082 -0.192391449 -0.097983324  
-0.142045771 0.045867815 -0.342362162 -0.339653711 -0.264549559 -0.163604708  
-0.259384045 -0.316612463 -0.37444435 -0.49374288 -0.163475034 -0.282533335  
-0.212138988 -0.248426888 -0.528159294 -0.513589622

TCGA-VQ-A8EO A 0.091700336 0.175221696 0.1676652 0.181628868  
-0.114834148 -0.116113238 0.036583043 0.158275713 -0.077855314 -0.247424472  
-0.25301673 -0.35123346 -0.232395345 -0.054756316 -0.082419236 0.085921679  
-0.109902018 -0.015065888 -0.018599821 -0.12233918 -0.129132465 -0.090429914

-0.256171639 -0.072833621 -0.270835162 -0.350268043  
 TCGA-VQ-A8E2    B    -0.322690417 -0.205338491 0.115926036 -0.026979141  
 -0.082571751 -0.409713892 -0.332019047 -0.498277207 0.096338087 0.269749437  
 -0.112060025 -0.000455752 -0.284128502 -0.404370101 -0.46181945 -0.403134659  
 -0.396445918 -0.244253834 -0.423342379 -0.629604747 0.025422699 -0.003202959  
 0.425748855 0.242031009 -0.480047719 -0.474157735  
 TCGA-VQ-A8E3    A    -0.415776196 0.334590502 0.338874523 0.306699794  
 -0.259118161 -0.166821281 -0.174403037 -0.193767785 -0.171909781 -0.344392236  
 -0.295487332 -0.415189813 -0.265817971 0.42612551 0.008054436 -0.102729059  
 0.239291878 -0.046174722 -0.214512738 0.225905597 -0.208503295 -0.213539396  
 -0.228025862 -0.206920427 0.293189081 0.460807111  
 TCGA-VQ-A8P2    A    0.064129268 0.395641163 0.374008325 0.327534333  
 -0.160653249 -0.407028654 -0.320528524 -0.042230817 0.016452307 -0.271828407  
 -0.25132949 -0.364969158 -0.478641494 -0.429697815 -0.334415461 -0.284857703  
 -0.298049209 -0.235289427 -0.273422951 -0.52357698 -0.127474273 -0.088128893  
 -0.06377845 -0.123945992 -0.668695838 -0.596260212  
 TCGA-VQ-A8P3    A    -0.066011019 -0.160638776 0.106345158 0.120340731  
 -0.050373492 -0.046418533 -0.266105014 -0.236581247 -0.208341616 -0.025016804  
 0.062832623 0.287288446 0.121873018 0.428532245 -0.375770304 -0.091075479  
 0.028257769 -0.363533234 -0.416712795 -0.067075115 -0.042771695 -0.210047173  
 -0.092342939 0.037430094 0.236170233 0.482212048  
 TCGA-VQ-A8P5    B    -0.310494035 0.283655598 0.278837059 0.401458708 -0.22867555  
 -0.154024531 -0.356400111 -0.319179419 -0.277491617 -0.410863163 -0.210120764  
 0.092312682 -0.275480759 0.210428332 -0.077290132 -0.326792126 -0.126813383  
 -0.417389575 -0.441074865 -0.393764462 -0.22907104 -0.374420425 -0.090990932  
 -0.219349023 -0.43249894 -0.26068533  
 TCGA-VQ-A8P8    B    0.173319702 -0.366271351 -0.412716035 -0.389924218 0.040696641  
 0.172432821 0.177926395 0.062452454 0.03441034 0.091136883 0.157700103  
 0.232857485 0.295594443 -0.169835201 -0.211984448 -0.138446519 0.167671333  
 0.018665012 0.241620058 0.377337931 0.084153972 0.042695007 0.219349402  
 0.13614024 0.081183461 -0.005106971  
 TCGA-VQ-A8PB    A    0.089267482 0.42148183 0.534171719 0.666427936  
 -0.069635236 -0.069075342 -0.031281609 0.164162366 0.023171241 0.112195437  
 0.0789028 0.016532166 -0.367533224 -0.287475429 -0.000942328 0.139253727  
 0.104754516 0.078647287 -0.004113326 -0.515914829 0.096409254 0.145203746  
 -0.274351315 0.014676567 -0.512779536 -0.348337719  
 TCGA-VQ-A8PC    B    -0.06613838 -0.256022829 -0.323174135 -0.08203541 0.08605028  
 -0.018085485 0.200679669 0.188414227 0.156150331 0.144579985 0.064787144  
 -0.02020262 0.141125774 -0.138558587 0.090141085 -0.07341228 0.047786005  
 0.165758152 0.385790028 0.259311852 0.204736167 0.250411183 0.085572156  
 0.115025327 -0.301592904 -0.307428549  
 TCGA-VQ-A8PD    B    0.170729209 -0.408700597 -0.448265837 -0.381480682 0.154018275  
 0.345819934 0.413778721 0.337642555 0.161727222 0.107866746 0.301395252  
 0.386155026 0.401412441 0.178336543 0.300641311 0.164473911 0.420295187

|               |   |              |              |              |              |              |              |
|---------------|---|--------------|--------------|--------------|--------------|--------------|--------------|
|               |   | 0.448115356  | 0.467525509  | 0.450546302  | 0.246412725  | 0.214346039  | 0.389023442  |
|               |   | 0.021445368  | 0.480767641  | 0.464741934  |              |              |              |
| TCGA-VQ-A8PE  | A | -0.185319617 | 0.243375827  | 0.352902662  | 0.282830497  |              |              |
|               |   | -0.021915383 | -0.042489746 | -0.018518917 | -0.17148349  | -0.078428123 | 0.043782654  |
|               |   | -0.118068816 | -0.263164528 | -0.218250062 | -0.183294155 | -0.027278402 | 0.151745593  |
|               |   | -0.120825338 | 0.095001406  | -0.030734662 | -0.254659941 | -0.035182998 | -0.118773873 |
|               |   | -0.126212593 | -0.258131143 | -0.184914701 | -0.162156685 |              |              |
| TCGA-VQ-A8PF  | B | -0.148612051 | 0.171922704  | 0.27056999   | 0.426454599  | 0.032329668  |              |
|               |   | 0.424371357  | 0.412905366  | 0.3712391    | -0.111419928 | -0.033761786 | 0.197865309  |
|               |   | 0.302991864  | 0.445893094  | 0.615729742  | 0.45486883   | 0.374316675  | 0.401155465  |
|               |   | 0.414358879  | 0.335844155  | 0.605153974  | 0.211256632  | 0.239453756  | 0.005612683  |
|               |   | 0.109428165  | 0.750071054  | 0.788214605  |              |              |              |
| TCGA-VQ-A8PH  | A | -0.128304222 | 0.333636654  | 0.04248333   | 0.40891478   |              |              |
|               |   | -0.269965651 | -0.169102589 | -0.167982482 | -0.417794126 | -0.267087489 | -0.271505233 |
|               |   | -0.370995642 | -0.502111053 | -0.308213664 | -0.261015151 | -0.378430593 | -0.238806309 |
|               |   | -0.316435369 | -0.162609301 | -0.284552708 | -0.337807314 | -0.258755158 | -0.195656502 |
|               |   | -0.073689253 | -0.26651089  | -0.3581049   | -0.38305618  |              |              |
| TCGA-VQ-A8PJA |   | 0.100070957  | 0.283472208  | -0.061369462 | -0.092167097 | -0.190404986 |              |
|               |   | -0.327535112 | -0.353384059 | -0.229472428 | 0.008549307  | -0.130286486 | -0.153430309 |
|               |   | -0.02882185  | -0.427058055 | -0.456608288 | -0.270568501 | -0.246639049 | -0.317471574 |
|               |   | -0.241642322 | -0.320646775 | -0.598516798 | -0.139435901 | -0.300203293 | -0.155867883 |
|               |   | -0.234885198 | -0.62495816  | -0.6897162   |              |              |              |
| TCGA-VQ-A8PK  | B | -0.107571103 | 0.366981947  | 0.115353632  | 0.244037803  | 0.091853812  |              |
|               |   | -0.219038193 | -0.2423796   | -0.049850527 | -0.057408251 | -0.251345153 | 0.079433803  |
|               |   | 0.134576454  | -0.231404128 | 0.208173835  | 0.118677805  | 0.093095445  | 0.145268987  |
|               |   | 0.022329873  | -0.04375571  | -0.306490001 | -0.03176768  | 0.070684237  | -0.185459507 |
|               |   | -0.212624198 | -0.024864259 | 0.198272465  |              |              |              |
| TCGA-VQ-A8PM  | B | 0.231458202  | -0.467663518 | -0.451544171 | -0.405726388 |              |              |
|               |   | -0.026145687 | 0.288134617  | 0.194790206  | -0.081395455 | -0.154989634 | -0.051253686 |
|               |   | 0.104741841  | 0.303958323  | 0.341499011  | 0.132941416  | 0.021642172  | -0.129311331 |
|               |   | 0.240809168  | 0.178929367  | 0.1745071    | 0.507370547  | -0.040437185 | -0.103703664 |
|               |   | -0.050175925 | -0.050013348 | 0.355947347  | 0.366749428  |              |              |
| TCGA-VQ-A8PO  | A | -0.014369819 | 0.569996077  | 0.330365933  | 0.38117514   |              |              |
|               |   | -0.014175758 | 0.105466668  | 0.146463541  | 0.25836729   | -0.072120146 | -0.261271253 |
|               |   | 0.011584127  | -0.185030727 | -0.066221356 | 0.449297083  | 0.315391213  | 0.289348011  |
|               |   | 0.261356959  | 0.384238485  | 0.364759471  | 0.413901984  | -0.034725104 | 0.01732757   |
|               |   | -0.176076415 | -0.261604484 | 0.468821689  | 0.554269369  |              |              |
| TCGA-VQ-A8PP  | B | -0.139710418 | 0.237286642  | 0.298148048  | -0.067579985 | 0.088320279  |              |
|               |   | -0.142090518 | -0.008776057 | 0.308091626  | 0.327845829  | 0.339905935  | 0.272985366  |
|               |   | 0.212308047  | -0.114327696 | -0.114962893 | 0.289401582  | 0.195622588  | 0.16771594   |
|               |   | 0.367378645  | 0.31591718   | -0.088809061 | 0.286809916  | 0.259334895  | 0.210678226  |
|               |   | 0.163355063  | -0.292443342 | -0.233395296 |              |              |              |
| TCGA-VQ-A8PQ  | B | -0.286274049 | -0.33594979  | -0.136528895 | -0.18934747  | 0.181114919  |              |
|               |   | 0.181265869  | 0.297313486  | 0.305670024  | 0.08425869   | 0.100971849  | 0.094075357  |

|              |   |              |              |              |              |              |              |
|--------------|---|--------------|--------------|--------------|--------------|--------------|--------------|
|              |   | -0.041127619 | 0.333508703  | 0.038169465  | 0.303043237  | -0.009732795 | 0.403774652  |
|              |   | 0.484203786  | 0.559497374  | 0.515213899  | 0.054639089  | 0.138539266  | 0.114652223  |
|              |   | -0.047675789 | 0.508205562  | 0.455189325  |              |              |              |
| TCGA-VQ-A8PU | A | 0.07805173   | 0.323765515  | 0.05928874   | 0.394486222  |              |              |
|              |   | -0.007392828 | -0.219717118 | -0.230613258 | 0.173032478  | -0.175088786 | -0.291704172 |
|              |   | -0.140716919 | -0.252578623 | -0.434133795 | -0.323993673 | -0.127661575 | -0.157969536 |
|              |   | -0.188248758 | -0.145428628 | -0.082090157 | -0.387834329 | -0.122364931 | 0.019376764  |
|              |   | -0.301989623 | -0.221164915 | -0.4540087   | -0.496844367 |              |              |
| TCGA-VQ-A8PX | A | -0.013004184 | 0.227910265  | 0.129114366  | -0.077877731 | -0.15478543  |              |
|              |   | -0.19477864  | -0.034109605 | 0.21926374   | -0.110921002 | -0.294320137 | -0.357512103 |
|              |   | -0.518692705 | -0.251582228 | 0.028793444  | 0.029269767  | 0.018612356  | -0.160819779 |
|              |   | 0.066313323  | 0.041454943  | 0.111500316  | -0.103454501 | -0.117054901 | -0.244790325 |
|              |   | -0.273817006 | 0.159789635  | -0.031288922 |              |              |              |
| TCGA-VQ-A91A | B | -0.09466262  | 0.013761969  | -0.082607352 | 0.384288876  | 0.102552269  |              |
|              |   | 0.129508466  | 0.203151278  | 0.22586019   | 0.00354101   | 0.30911825   | 0.439405898  |
|              |   | 0.554817675  | -0.060671157 | -0.291277474 | 0.282588948  | 0.416872748  | -0.069198943 |
|              |   | -0.166556269 | 0.032663589  | -0.39274062  | 0.207127608  | 0.302412607  | -0.01918443  |
|              |   | 0.192856149  | -0.53353241  | -0.361399864 |              |              |              |
| TCGA-VQ-A91D | B | -0.025461907 | 0.229689814  | 0.249004284  | 0.059952479  | 0.022754506  |              |
|              |   | -0.151643008 | -0.153817463 | 0.054661603  | -0.108010843 | 0.146332991  | 0.010346644  |
|              |   | 0.074874141  | -0.259252214 | 0.373751738  | 0.242214736  | 0.232719331  | 0.303985042  |
|              |   | -0.044120096 | 0.004477505  | -0.316846411 | 0.123793897  | 0.076787517  | -0.101553753 |
|              |   | 0.022254033  | 0.065392199  | 0.359090593  |              |              |              |
| TCGA-VQ-A91E | A | 0.07302797   | 0.401405591  | 0.240213712  | 0.409999872  |              |              |
|              |   | -0.040236964 | -0.24652072  | 0.031056844  | 0.281215932  | 0.04092352   | -0.041958145 |
|              |   | -0.177891296 | -0.384231158 | -0.281639682 | 0.199316834  | 0.069462152  | -0.056003677 |
|              |   | 0.16078702   | 0.21691665   | 0.281761561  | 0.088705808  | -0.01997674  | 0.11214329   |
|              |   | -0.199304825 | -0.154544824 | -0.087139027 | 0.14987993   |              |              |
| TCGA-VQ-A91K | B | -0.09595164  | 0.18717933   | -0.103007805 | -0.269159749 | 0.117596152  |              |
|              |   | -0.134654188 | 0.05684968   | 0.336820269  | 0.102876712  | 0.054170479  | 0.134107206  |
|              |   | 0.003234876  | 0.020576262  | 0.183859048  | 0.22515706   | 0.197876494  | 0.191084831  |
|              |   | 0.324826054  | 0.312959     | -0.228172727 | 0.120272789  | 0.069712139  | -0.089503538 |
|              |   | -0.079432997 | 0.081268024  | -0.184140261 |              |              |              |
| TCGA-VQ-A91N | A | 0.183745393  | 0.426720345  | 0.244899959  | 0.578819683  |              |              |
|              |   | -0.044399884 | -0.392450645 | -0.256236047 | 0.125705587  | 0.086392844  | -0.192209343 |
|              |   | -0.164371025 | -0.30933458  | -0.385717015 | -0.182752821 | -0.165501503 | -0.225167232 |
|              |   | -0.018877736 | -0.056821372 | -0.005697782 | -0.51146135  | 0.042724891  | 0.10579235   |
|              |   | 0.013863761  | -0.12083779  | -0.52995302  | -0.516559288 |              |              |
| TCGA-VQ-A91Q | B | -0.377481809 | -0.128656242 | -0.140062247 | -0.011063441 | 0.143542097  |              |
|              |   | -0.241172233 | -0.287348503 | -0.119299052 | 0.236029996  | 0.252548547  | 0.185084006  |
|              |   | 0.390895885  | -0.253773543 | -0.256392279 | -0.29485444  | -0.171629079 | -0.252448502 |
|              |   | -0.060934652 | -0.150960719 | -0.452292502 | 0.242986452  | 0.132955326  | 0.353173547  |
|              |   | 0.232552365  | -0.394962993 | -0.453217082 |              |              |              |
| TCGA-VQ-A91S | A | -0.096124604 | 0.313902558  | 0.306439494  | 0.366737434  | 0.027520033  |              |

|              |   |              |              |              |              |              |              |
|--------------|---|--------------|--------------|--------------|--------------|--------------|--------------|
|              |   | -0.166150277 | 0.072351984  | 0.23160668   | 0.08819987   | -0.120831734 | -0.064620391 |
|              |   | -0.376534032 | -0.197827354 | -0.133050059 | 0.054196994  | 0.023649091  | -0.011742615 |
|              |   | 0.244053458  | 0.12639816   | -0.452429399 | 0.0878463    | 0.059043314  | -0.007554139 |
|              |   | -0.12273983  | -0.449556116 | -0.332840682 |              |              |              |
| TCGA-VQ-A91U | A | 0.011216201  | 0.116656124  | 0.137465826  | 0.300041671  |              |              |
|              |   | -0.151761806 | -0.070593776 | 0.099168137  | -0.056368089 | -0.065803027 | -0.279561298 |
|              |   | -0.088398985 | -0.176775509 | 0.069550628  | 0.367506221  | -0.005637973 | 0.245895479  |
|              |   | 0.091232528  | 0.187660951  | 0.056238533  | 0.292097109  | -0.150629012 | -0.062581069 |
|              |   | -0.248036143 | -0.336321364 | 0.429689992  | 0.511154074  |              |              |
| TCGA-VQ-A91V | A | 0.059928987  | 0.079106761  | 0.13511163   | 0.061335703  |              |              |
|              |   | -0.187250823 | -0.428593034 | -0.293774412 | -0.049169345 | -0.070861023 | -0.226691534 |
|              |   | -0.282079119 | -0.401492101 | -0.41622908  | -0.236612154 | -0.208959738 | -0.12971952  |
|              |   | -0.202204674 | -0.279935784 | -0.160175231 | -0.620108927 | -0.120388079 | -0.090591893 |
|              |   | -0.253708558 | -0.131217653 | -0.641226946 | -0.596036599 |              |              |
| TCGA-VQ-A91X | A | 0.101839611  | 0.222810192  | 0.380335275  | 0.374998233  |              |              |
|              |   | -0.277651276 | -0.395140339 | -0.397215337 | -0.287213051 | -0.152798582 | -0.32562293  |
|              |   | -0.44182904  | -0.539501663 | -0.497378027 | -0.259097866 | -0.291560065 | -0.308943257 |
|              |   | -0.33814355  | -0.326940693 | -0.269217131 | -0.565620427 | -0.26415443  | -0.266797559 |
|              |   | -0.24308442  | -0.322322428 | -0.588806432 | -0.540097987 |              |              |
| TCGA-VQ-A91Y | B | -0.197819395 | -0.337572497 | -0.107991322 | -0.252928735 | 0.190217092  |              |
|              |   | 0.140362095  | 0.214460381  | 0.05502913   | 0.296448313  | 0.256275247  | 0.396320138  |
|              |   | 0.508968811  | 0.355269636  | 0.185765351  | 0.25326886   | 0.185241299  | 0.168241416  |
|              |   | 0.334293117  | 0.168727987  | 0.332923044  | 0.240305545  | 0.203631556  | 0.29653298   |
|              |   | 0.049352751  | 0.430734532  | 0.28541256   |              |              |              |
| TCGA-VQ-A91Z | A | -0.052067557 | 0.397381508  | 0.331884075  | 0.398370975  |              |              |
|              |   | -0.110274007 | -0.480274745 | -0.409023869 | -0.366425984 | 0.214026391  | -0.121124657 |
|              |   | -0.340339381 | -0.297486491 | -0.543154257 | -0.475424544 | -0.309137427 | -0.173042627 |
|              |   | -0.388233855 | -0.210905583 | -0.376546867 | -0.655076608 | -0.007387263 | -0.074764284 |
|              |   | 0.259599368  | -0.094658075 | -0.710468896 | -0.751623682 |              |              |
| TCGA-VQ-A922 | B | -0.276968557 | 0.144362911  | 0.080636964  | -0.006180212 | 0.115022967  |              |
|              |   | -0.316496696 | -0.187543151 | -0.332666914 | 0.125879486  | 0.282932126  | 0.249660826  |
|              |   | 0.338064671  | -0.366856817 | -0.553468806 | -0.30509446  | -0.177944031 | -0.340914602 |
|              |   | -0.090201919 | -0.107265184 | -0.647068605 | 0.219022028  | 0.284435889  | 0.396986794  |
|              |   | 0.207582229  | -0.74360199  | -0.657876235 |              |              |              |
| TCGA-VQ-A923 | B | -0.347255277 | 0.322919488  | 0.418169733  | 0.601524298  | 0.110953441  |              |
|              |   | 0.25378278   | 0.354619591  | 0.232020499  | -0.143664471 | -0.030959501 | 0.03395784   |
|              |   | -0.0411069   | 0.328237849  | 0.287952439  | 0.355323085  | 0.343108077  | 0.275187068  |
|              |   | 0.43179348   | 0.331288221  | 0.44925543   | 0.102973978  | -0.00897419  | 0.004981238  |
|              |   | -0.162524134 | 0.553984556  | 0.445881525  |              |              |              |
| TCGA-VQ-A924 | B | -0.030707249 | 0.453729641  | 0.450685758  | 0.360840532  |              |              |
|              |   | -0.001981514 | -0.186236193 | -0.078276338 | 0.134673555  | 0.10325913   | -0.012431006 |
|              |   | 0.033452381  | -0.052088237 | -0.297835931 | 0.308243129  | 0.073309336  | 0.175362412  |
|              |   | 0.129909237  | 0.202119944  | 0.105551299  | -0.350393343 | 0.104460919  | 0.150030435  |
|              |   | -0.041265122 | -0.04509696  | -0.219631065 | 0.054992983  |              |              |

TCGA-VQ-A925 A 0.267304904 -0.155522869 -0.295014453 -0.087109898 0.020421751  
-0.288771459 -0.229885826 -0.043709335 -0.150235761 -0.281470657 -0.216944282  
-0.254589471 -0.35926216 -0.336722587 -0.292472248 -0.231102798 -0.257475748  
-0.122194024 -0.154025079 -0.539454411 -0.081869069 -0.136206346 -0.018137917  
-0.114433102 -0.531307963 -0.507540702

TCGA-VQ-A927 A 0.356336978 -0.260194727 -0.379726293 -0.342627277  
-0.040168618 0.010145249 0.084302125 0.057022522 0.013779377 -0.116679279  
0.227417315 0.293723012 -0.151319709 -0.293254452 -0.066435317 -0.047259913  
0.057855178 -0.139913921 -0.01521858 -0.122236173 0.037081048 0.146928965  
0.142493214 0.045210758 -0.390293057 -0.305595473

TCGA-VQ-A928 B -0.263019799 0.2673499 -0.134305937 0.138518704 0.09694652  
-0.134840371 -0.185552529 -0.039337834 0.046388735 0.267073692 0.175830854  
0.371191883 -0.100484606 -0.100352306 -0.111806999 -0.004349432 -0.242922841  
-0.187235648 -0.2020639 -0.282898866 0.177909871 0.11663209 0.252714194  
0.100601117 -0.151215999 -0.025734485

TCGA-VQ-A92D A 0.017026166 0.042037344 0.21280766 0.43007617 0.02911894  
-0.307563634 -0.297229717 0.170660785 0.025932344 0.08290678 0.141099555  
0.129731591 -0.372454933 -0.285984274 0.005719199 -0.050551673 -0.101840177  
-0.214690267 -0.183495974 -0.673386596 0.121429469 0.057896637 0.024179135  
-0.16414573 -0.568977296 -0.474725701

TCGA-VQ-A94O A -0.0448466 0.317687487 0.308276772 0.549689794  
-0.203258724 -0.196572747 -0.109325739 -0.304775803 0.032722154 0.098698141  
-0.221722615 -0.195673482 -0.283379867 -0.365330762 -0.231816855 -0.088202185  
-0.281219277 -0.061276924 -0.291273329 -0.420649358 -0.021289186 -0.083579779  
0.072148106 -0.14707461 -0.471245993 -0.478628952

TCGA-VQ-A94P B 0.039412949 -0.636588397 -0.372867878 -0.496444542 0.270444469  
0.10147816 0.160992177 -0.128944642 0.196173537 0.240802068 0.30383592  
0.297330011 0.257787934 -0.071652167 0.076838116 0.115271913 -0.052258121  
0.075081597 -0.018568779 0.140730527 0.057553008 0.116824503 0.178670781  
0.101421363 0.065016586 0.104712429

TCGA-VQ-A94R B -0.027150584 0.035566281 0.171404346 0.338834015 0.003315637  
-0.253757176 -0.123247075 -0.329344594 0.094996788 0.11742059 -0.046109507  
0.007581279 -0.143703721 -0.207614376 -0.222839609 -0.323828721 -0.256649362  
-0.088176962 -0.278773295 -0.17195628 0.005234959 0.146730819 0.296555628  
0.034637026 -0.184595616 -0.382879732

TCGA-VQ-A94T A -0.207876314 0.40277139 0.444808263 0.530112694  
-0.097490641 -0.371852777 -0.329674101 -0.087289031 0.019202117 -0.029042556  
-0.033889798 -0.12519409 -0.471673751 -0.174328289 -0.304693505 -0.197327172  
-0.161768392 -0.275447112 -0.191620843 -0.574926608 -0.028873428 0.054182723  
-0.287230129 -0.000971998 -0.687205409 -0.587513249

TCGA-VQ-A94U B -0.192661707 0.237656341 0.14645291 0.457579692  
-0.116811522 -0.388378402 -0.346263076 -0.314349535 -0.156670647 -0.224623176  
-0.18700093 0.00881534 -0.33889266 -0.489919617 -0.401724342 -0.262859947  
-0.409521608 -0.462023051 -0.421471813 -0.515891728 -0.214213214 -0.244591926

|              |   |              |              |              |              |              |
|--------------|---|--------------|--------------|--------------|--------------|--------------|
|              |   | 0.059248742  | -0.280395343 | -0.600581548 | -0.634767035 |              |
| TCGA-VQ-AA64 | B | -0.311554189 | 0.01892474   | 0.085661101  | 0.104989657  |              |
|              |   | -0.064459528 | -0.395642963 | -0.357250992 | -0.273978439 | 0.044359272  |
|              |   | 0.207081668  | 0.380491352  | -0.336923472 | -0.40824634  | -0.316199265 |
|              |   | -0.353554065 | -0.293681879 | -0.26077582  | -0.582388524 | -0.055626915 |
|              |   | -0.036092934 | -0.125612521 | -0.580615625 | -0.600708913 |              |
| TCGA-VQ-AA68 | A | -0.082920136 | 0.389295278  | 0.190798453  | 0.406981953  | 0.082690751  |
|              |   | -0.053047964 | -0.036704346 | 0.276541497  | 0.117526765  | 0.208331648  |
|              |   | -0.138715104 | 0.004164953  | 0.321418714  | 0.146279594  | -0.06746942  |
|              |   | 0.294458521  | 0.331009205  | 0.008694493  | 0.13417219   | 0.154207272  |
|              |   | 0.024625032  | 0.271895536  | 0.333397452  |              | -0.254695449 |
| TCGA-VQ-AA69 | A | -0.310507162 | 0.385886512  | 0.527978358  | 0.608986177  | 0.049962365  |
|              |   | -0.357664704 | -0.026713156 | 0.054547601  | 0.163139766  | 0.044222463  |
|              |   | -0.369420267 | -0.319740105 | 0.225868698  | 0.137520664  | -0.084311074 |
|              |   | 0.307575327  | 0.137049221  | -0.378574429 | 0.07916756   | 0.392554595  |
|              |   | 0.140579487  | -0.193306004 | -0.087226488 |              | -0.211984055 |
| TCGA-VQ-AA6A | A | -0.116246506 | 0.318085709  | 0.148715542  | 0.249658874  |              |
|              |   | -0.041795895 | -0.407444957 | -0.299651848 | 0.062412551  | -0.108140947 |
|              |   | -0.056226118 | -0.177608702 | -0.427909585 | -0.397976737 | -0.101161555 |
|              |   | -0.327524542 | -0.051219427 | -0.163189751 | -0.565514922 | -0.032503016 |
|              |   | -0.230128832 | -0.046926154 | -0.679913789 | -0.655229588 | 0.095340853  |
| TCGA-VQ-AA6D | A | -0.013494259 | 0.203489499  | 0.398119128  | 0.281192722  |              |
|              |   | -0.183527599 | -0.31879226  | -0.329505335 | -0.178066202 | -0.203001007 |
|              |   | -0.332436109 | -0.35131688  | -0.549347169 | -0.329589732 | -0.122832546 |
|              |   | -0.348104631 | -0.236361762 | -0.291591073 | -0.53535106  | 0.144919225  |
|              |   | -0.297124397 | -0.387029504 | -0.61079084  | -0.647526191 | -0.196587124 |
| TCGA-VQ-AA6F | A | -0.106304046 | 0.101074426  | -0.127556814 | 0.161203107  | 0.032609986  |
|              |   | 0.23524957   | 0.125909249  | 0.042942196  | -0.066760272 | -0.044884447 |
|              |   | 0.016719142  | 0.225220951  | 0.325791402  | 0.122776527  | -0.021330086 |
|              |   | 0.136654378  | 0.288820214  | 0.499200676  | 0.181983423  | 0.157824794  |
|              |   | 0.065529832  | 0.381950255  | 0.411038391  | 0.130734386  | -0.1648633   |
| TCGA-VQ-AA6G | A | 0.088907341  | -0.123379421 | -0.109112065 | -0.178996078 | 0.165672139  |
|              |   | -0.020149127 | 0.048005451  | 0.354350603  | 0.05576358   | 0.112064451  |
|              |   | -0.1158128   | -0.155863094 | 0.07746825   | 0.132819271  | 0.206214895  |
|              |   | 0.126683962  | 0.162763892  | 0.132819271  | 0.251831893  | 0.092766612  |
|              |   | -0.039911537 | -0.185862252 | -0.224201036 | 0.116934936  | -0.296819407 |
| TCGA-VQ-AA6J | B | 0.0108568    | 0.414476104  | 0.106416461  | 0.539620567  |              |
|              |   | -0.150614674 | 0.155718307  | 0.214081272  | 0.107317137  | -0.118591953 |
|              |   | -0.128009945 | -0.097922819 | 0.102851726  | 0.285853208  | -0.261973539 |
|              |   | 0.253800259  | 0.326042132  | 0.304849382  | 0.092369386  | 0.075404262  |
|              |   | -0.341205179 | -0.227909104 | 0.593768184  | -0.093568261 | 0.063295472  |
| TCGA-VQ-AA6K | B | -0.246348223 | 0.163804161  | 0.175614473  | 0.126566056  | -0.14586585  |
|              |   | -0.15841612  | -0.158085047 | -0.369943241 | -0.113930351 | -0.170841935 |
|              |   | 0.094502534  | -0.180753975 | -0.002938951 | -0.148332502 | -0.05828068  |
|              |   |              |              |              | -0.101744259 | -0.09990515  |

-0.124493991 -0.208219308 -0.277503431 -0.075934788 0.105058477 -0.150371138  
0.004759228 -0.224039145 -0.184093348  
TCGA-ZA-A8F6B 0.319404069 -0.497796974 -0.468933872 -0.547478752 0.182517889  
-0.012315467 0.084322638 0.205664682 0.028732556 0.058817137 0.278832254  
0.302762312 0.230808291 -0.198534828 0.070366053 -0.018594486 -0.029708219  
-0.110496521 0.092250909 -0.162839924 -0.047648255 0.117629162 -0.060030477  
-0.037866155 -0.088341776 -0.244041374  
TCGA-ZQ-A9CR B 0.138754718 -0.120081161 -0.231559909 0.05272027  
-0.071892061 0.391314699 0.137893649 -0.137804243 -0.234726915 -0.137499266  
0.193466212 0.498937333 0.298871779 0.322867622 -0.087346712 0.262543007  
0.162713139 -0.129331274 -0.19409009 0.299074371 -0.050601451 -0.113848816  
-0.142396851 0.060742257 0.437106454 0.540464775
